# Supplementary material for: miR-200c-3p, miR-222-5p, and miR-512-3p Constitute a Biomarker Signature of Sorafenib Effectiveness in Advanced Hepatocellular Carcinoma
Source: MDPI journal article supplement (doi:10.3390/cells11172673), 2022-08-28
Supplement: s1 [file s1]

## SUPPLEMENTARY MATERIAL

### **miR-200c-3p, miR-222-5p and miR-512-3p constitute a biomarker signature of Sorafenib effectiveness in advanced hepatocellular carcinoma**

Patricia de la Cruz-Ojeda<sup>1,2,3</sup>, Tobias Schmid<sup>4</sup>, Loreto Boix<sup>2,5</sup>, Manuela Moreno<sup>6</sup>, Víctor Sapena<sup>5</sup>, Juan M. Praena-Fernández<sup>7</sup>, Francisco J. Castell<sup>8</sup>, Juan Manuel Falcón-Pérez<sup>2,9</sup>, María Reig<sup>2,5</sup>, Bernhard Brüne<sup>4,10,11,12</sup>, Miguel A. Gómez-Bravo<sup>6</sup>, Alvaro Giraldez<sup>13</sup>, Jordi Bruix<sup>2,5</sup>, María T. Ferrer<sup>13</sup>, Jordi Muntané<sup>1,2,3,\*</sup>

<sup>1</sup>Institute of Biomedicine of Seville (IBiS), Hospital University “Virgen del Rocío”/CSIC/University of Seville, Seville, 41013, Spain

<sup>2</sup>Networked Biomedical Research Center Hepatic and Digestive Diseases (CIBEREHD)

<sup>3</sup>Department of Medical Physiology and Biophysics, University of Seville, Seville, 41004, Spain

<sup>4</sup>Institute of Biochemistry I, Faculty of Medicine, Goethe-University Frankfurt, Frankfurt, 60528, Germany

<sup>5</sup>BCLC Group, Liver Unit, Hospital Clinic, University of Barcelona, IDIBAPS, CIBEREHD, Barcelona, 08036, Spain

<sup>6</sup>Department of General Surgery, Hospital University “Virgen del Rocío”/CSIC/University of Seville/IBiS, Seville, 41013, Spain

<sup>7</sup>Department of Statistics and Operations Research, University of Granada, Granada, 18011, Spain

<sup>8</sup>Department of Radiology, Hospital University “Virgen del Rocío”/CSIC/University of Seville/IBiS, Seville, 41013, Spain

<sup>9</sup>Exosomes Lab, CIC bioGUNE, Derio, 48160, Spain

<sup>10</sup>German Cancer Consortium (DKTK), Partner Site Frankfurt, Frankfurt, 60528, Germany

<sup>11</sup>Frankfurt Cancer Institute, Goethe-University Frankfurt, Frankfurt, 60528, Germany

<sup>12</sup>Fraunhofer Institute for Translational Medicine and Pharmacology ITMP, Frankfurt, 60528, Germany

<sup>13</sup>Unit for the Clinical Management of Digestive Diseases, Hospital University “Virgen del Rocío”/CSIC/University of Seville/IBiS, Seville, 41013, Spain

\*Correspondence: [jmuntane-ibis@us.es](mailto:jmuntane-ibis@us.es); Tel. +34-955923122; Fax. +34-955923002

**A**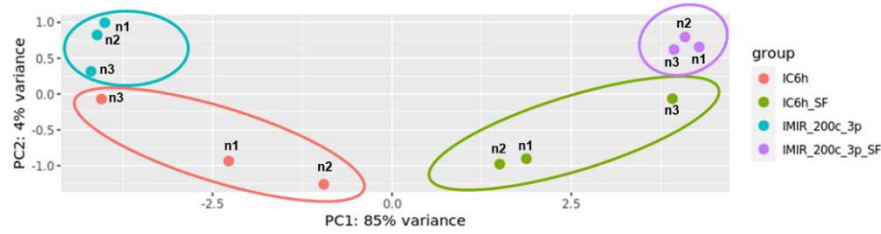**B**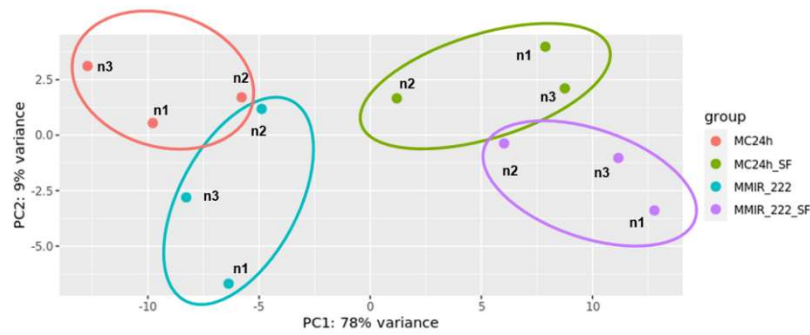**C**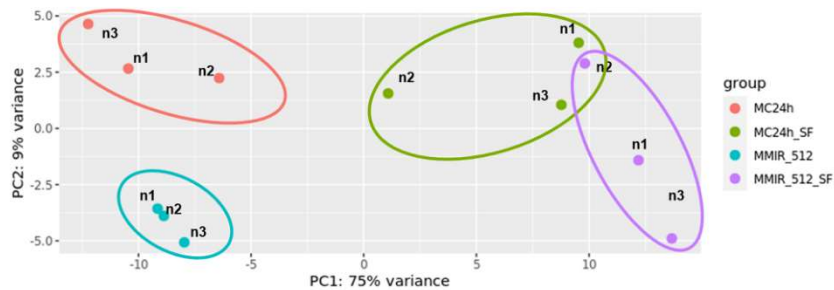

**Figure S1. Principal component analysis (PCA) of RNA-Seq data. (A)** PCA analysis of differentially expressed genes ( $p\text{-adj}<0.05$ ) in miR-200c-3p inhibitor and control transfected cells, treated with Sorafenib. **(B)** PCA analysis of differentially expressed genes ( $p\text{-adj}<0.05$ ) in miR-222-5p and control transfected cells, treated with Sorafenib. **(C)** PCA analysis of differentially expressed genes ( $p\text{-adj}<0.05$ ) in miR-512-3p mimic and control transfected cells, treated with Sorafenib.

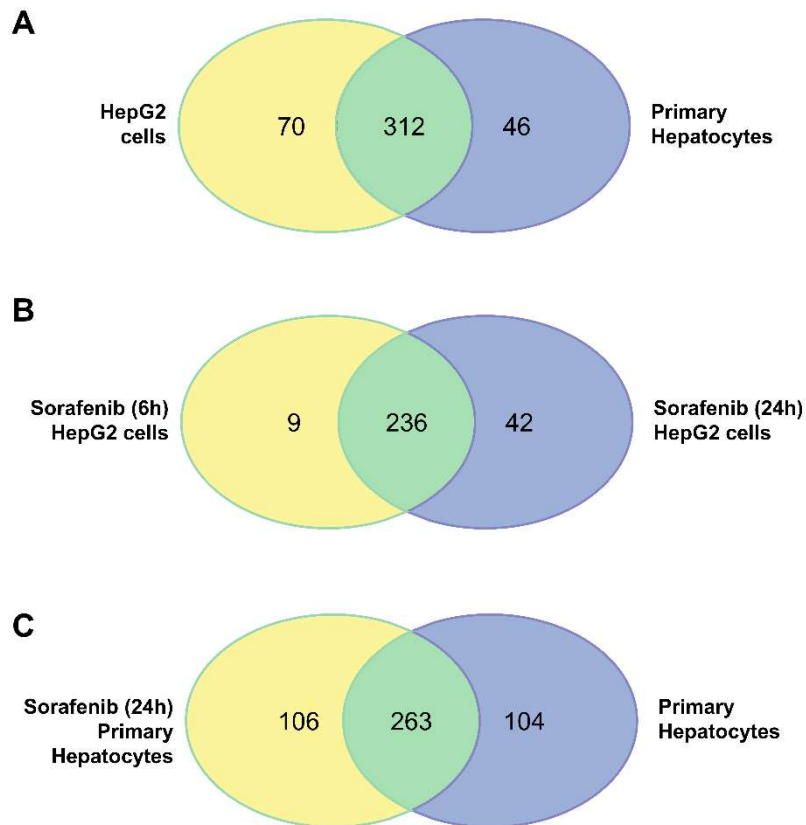

**Figure S2.** Venn analysis of microarray data. **(A)** Comparison of HepG2 cells and primary human hepatocytes. **(B)** Comparison of miRNAs in HepG2 cells treated with Sorafenib for 6 and 24 h. **(C)** miRNAs induced by Sorafenib (24 h) in primary hepatocytes, compared to non-treated cells.

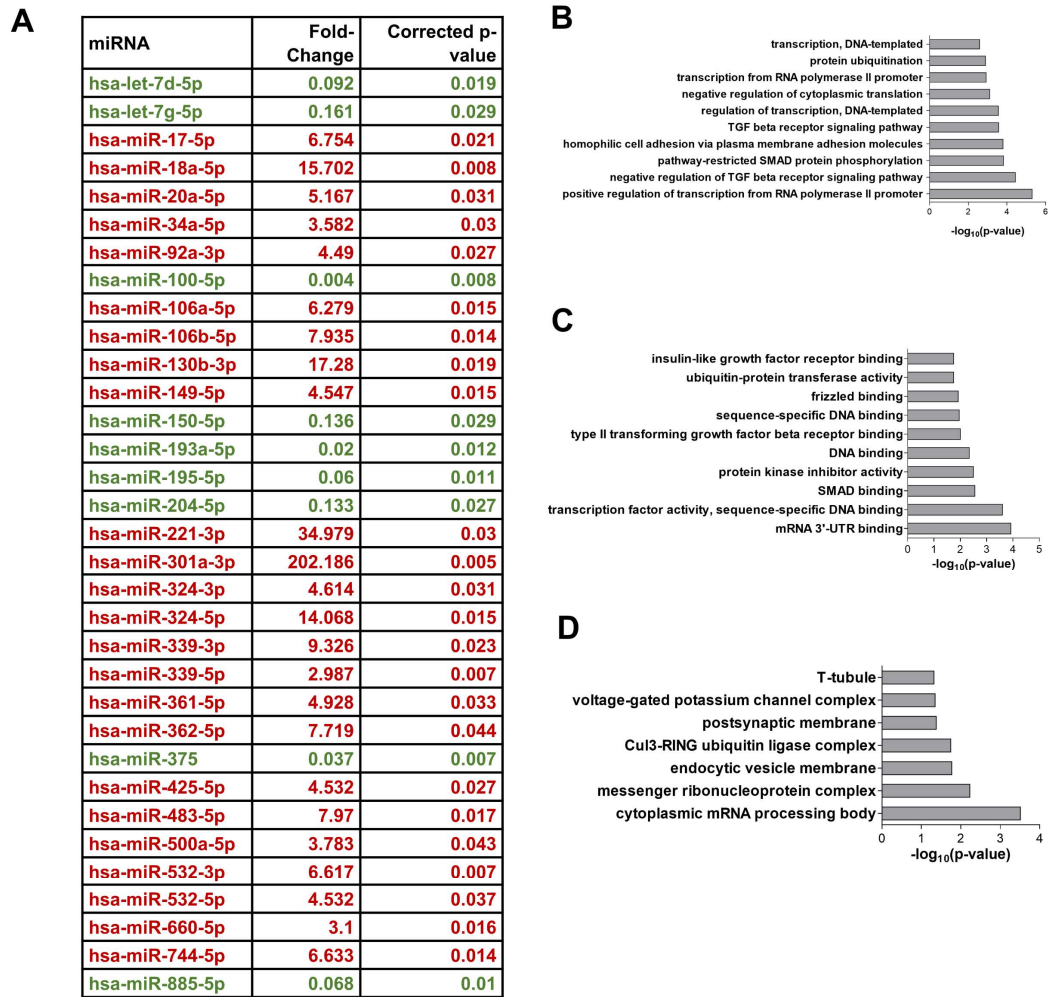

**Figure S3.** miRNA expression in HepG2 cells, compared to primary hepatocytes. **(A)** Summary Table of significant differentially expressed miRNAs in tumor cells, showing fold-change and corrected p-value. Up-regulated miRNAs are shown in red and down-regulated miRNAs are shown in green. **(B-D)** Top 10 gene ontology (GO) terms biological process, molecular function and cellular component significantly enriched in miRNA targets, respectively.

**A**

| miRNA           | Fold-Change | p-value |
|-----------------|-------------|---------|
| hsa-miR-29c-3p  | 3.076       | 0.009   |
| hsa-miR-376a-3p | 0.405       | 0.042   |
| hsa-miR-671-3p  | 4.779       | 0.036   |

**B**

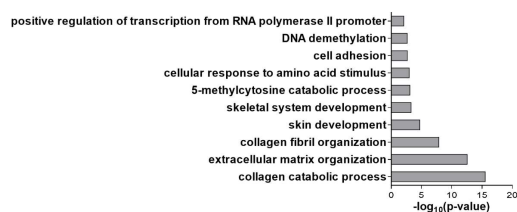

**C**

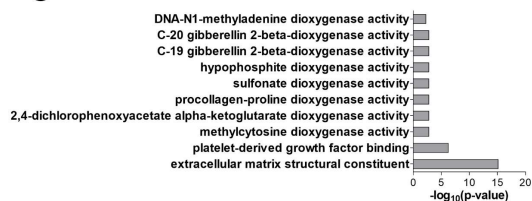

**D**

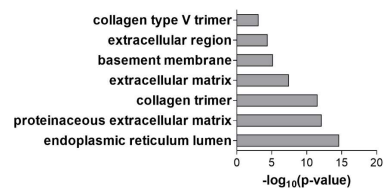

**Figure S4.** miRNA expression profile in Sorafenib treated primary hepatocytes. **(A)** Summary Table of significant differentially expressed miRNAs after Sorafenib treatment, showing fold-change and p-value. Up-regulated miRNAs are shown in red and down-regulated miRNAs are shown in green. **(B-D)** Top 10 gene ontology (GO) terms biological process, molecular function and cellular component significantly enriched in miRNA targets, respectively.

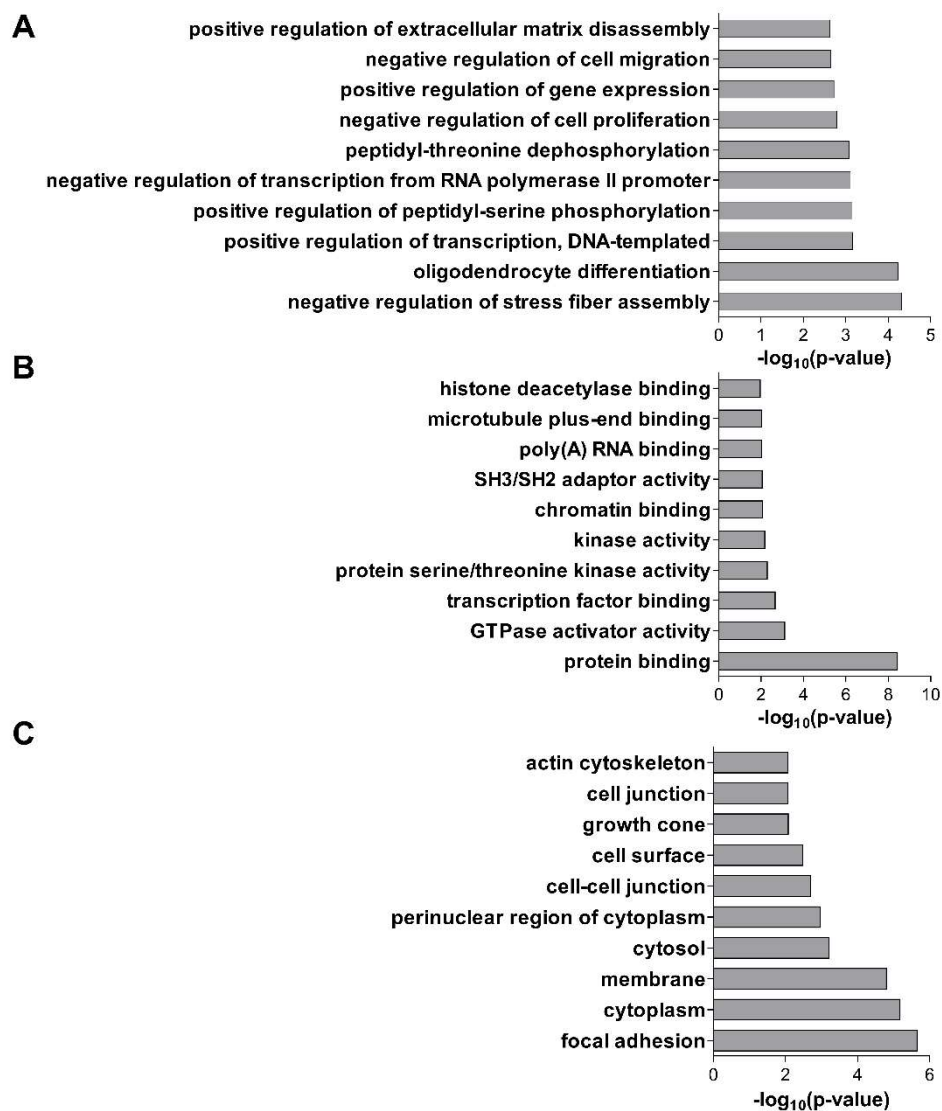

**Figure S5.** (A-C) Top 10 gene ontology (GO) biological process, molecular function and cellular component terms significantly enriched in targets of miRNAs differentially expressed at 6 h of Sorafenib treatment, respectively.

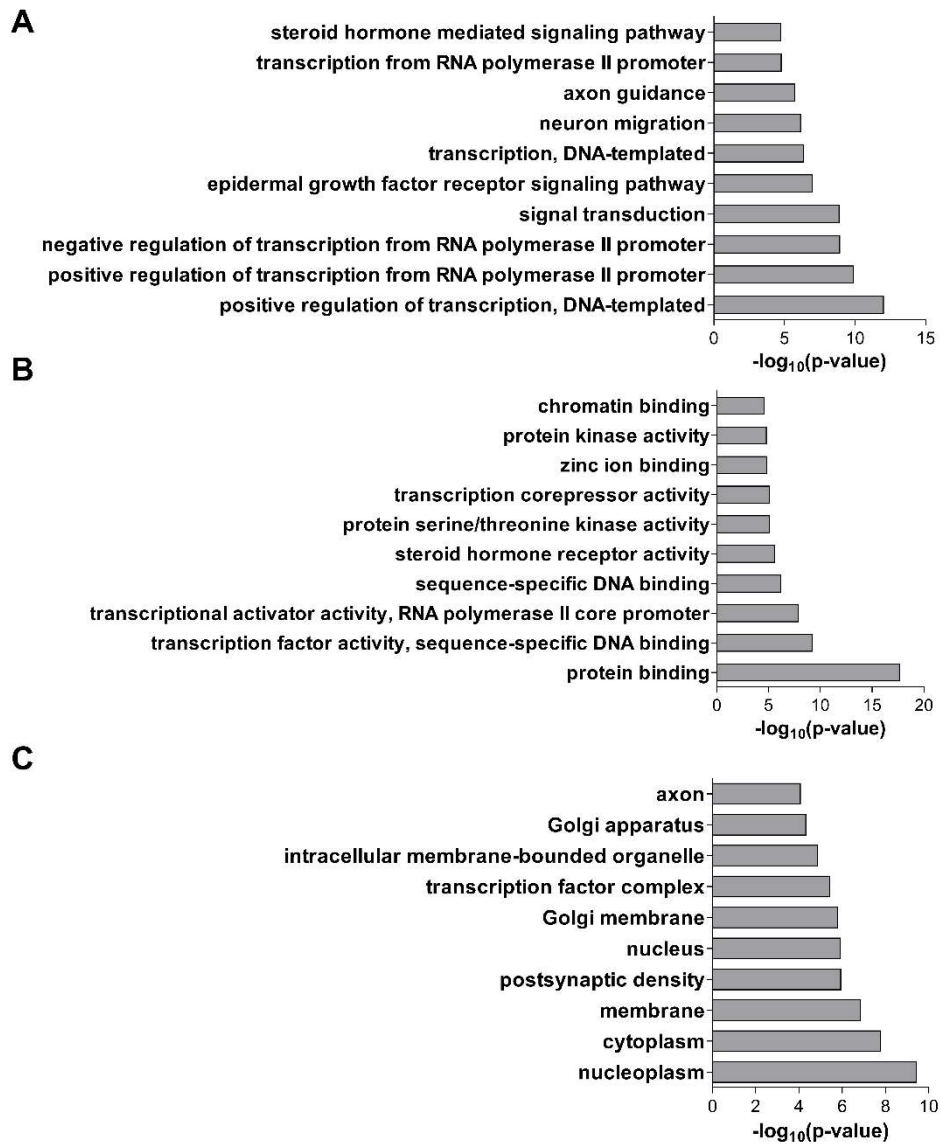

**Figure S6.** (A-C) Top 10 gene ontology (GO) biological process, molecular function and cellular component terms significantly enriched in targets of miRNAs differentially expressed at 24 h of Sorafenib treatment, respectively.

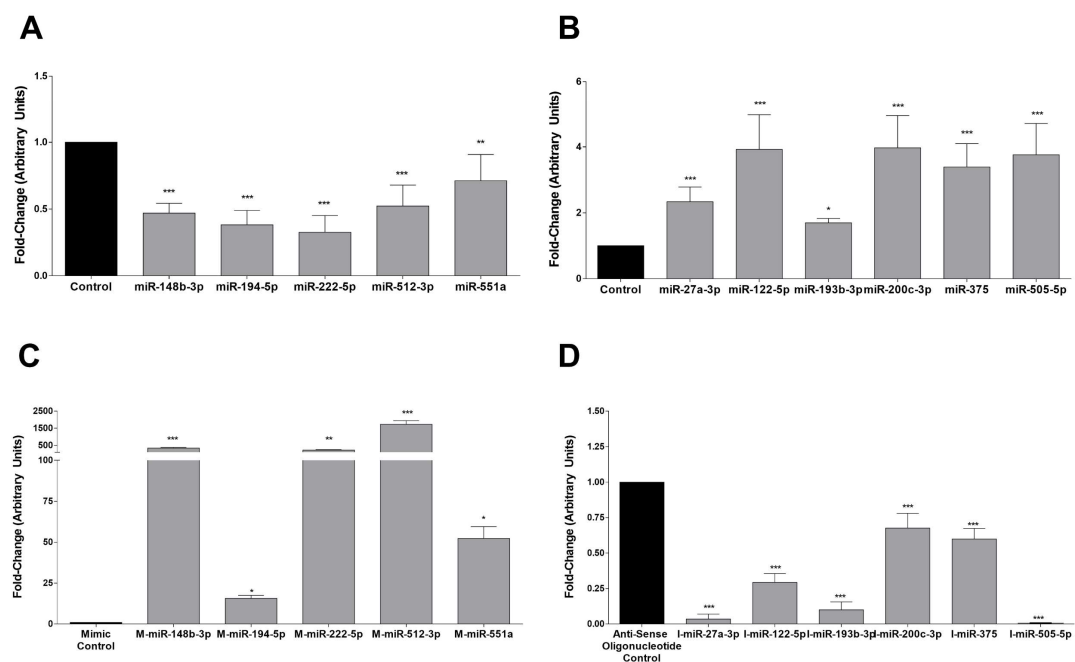

**Figure S7.** miRNA validation. **(A)** q-PCR validation of down-regulated miRNAs in Sorafenib treated HepG2 cells. **(B)** q-PCR validation of upregulated miRNAs in Sorafenib treated HepG2 cells. **(C)** miRNA expression values after miRNA mimics of down-regulated miRNAs. **(D)** miRNA expression values after miRNA inhibition of up-regulated miRNAs. \*  $p \leq 0.05$  \*\*  $p \leq 0.01$ , and \*\*\*  $p \leq 0.001$  between control and miRNA tested.



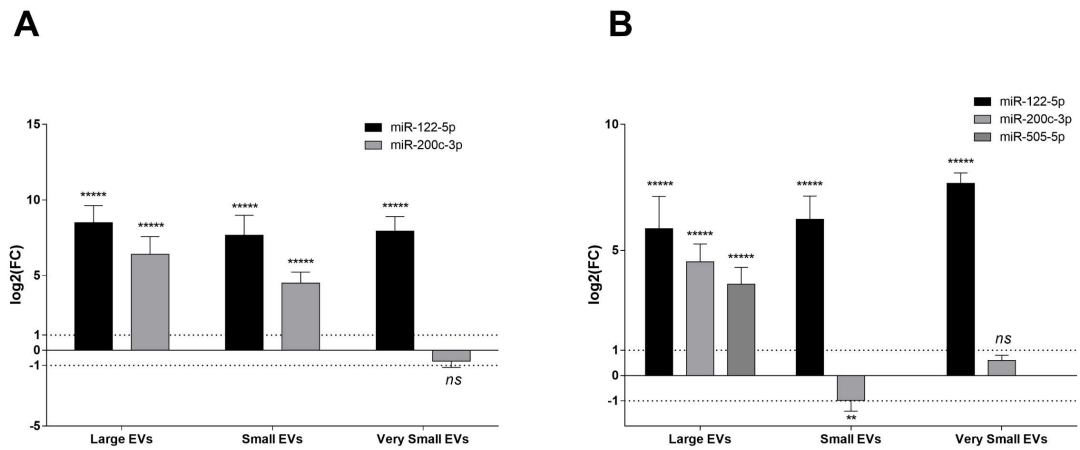

**Figure S8.** miRNA expression values in extracellular vesicles (EVs) compared to cellular content at 6 h. **(A)** miRNA expression in Large, Small and Very Small EVs related to intracellular content in control cells (6 h). **(B)** miRNA expression in Large, Small and Very Small EVs related to intracellular content in Sorafenib treated cells (6 h). Ns, non-significant; \*\*  $p \leq 0.01$ , and \*\*\*  $p \leq 0.0001$  between the miRNA expression in the EVs fractions compared to cellular levels.

**A**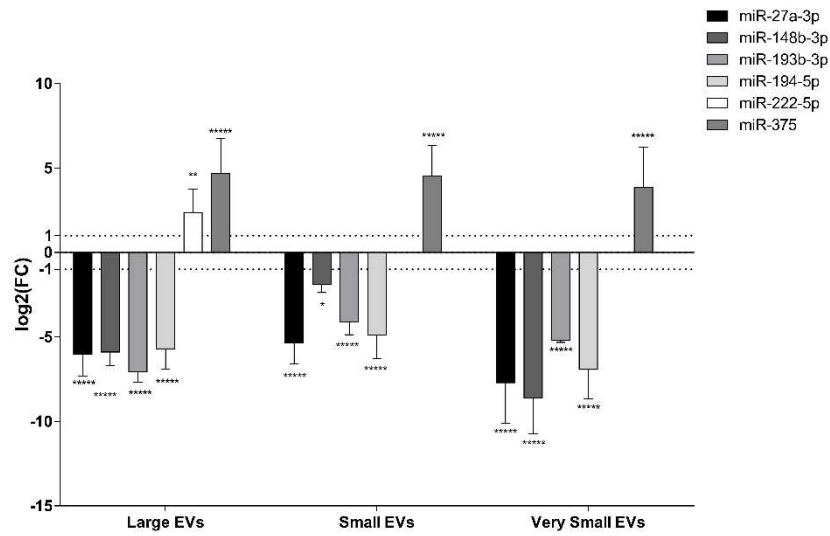**B**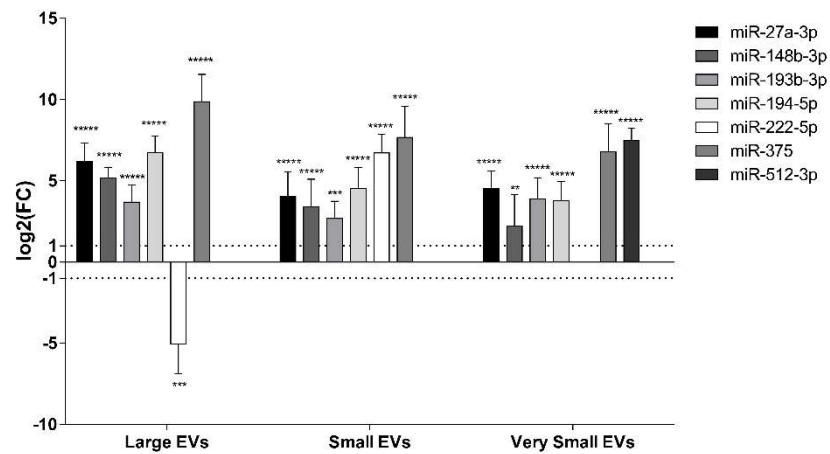

**Figure S9.** miRNA expression values in extracellular vesicles (EVs) compared to cellular content at 24 h. **(A)** miRNA expression in Large, Small and Very Small EVs related to intracellular content in control cells (24 h). **(B)** miRNA expression in Large, Small and Very Small EVs related to intracellular content in Sorafenib treated cells (24 h). \*  $p \leq 0.05$ , \*\*  $p \leq 0.01$ , \*\*\*  $p \leq 0.001$ , and \*\*\*\*  $p \leq 0.0001$  between the miRNA expression in the EVs fractions compared to cellular levels.

**Table S1.** Comparison of demographic and epidemiologic data of the study cohort (n=36), and the validation cohort (n=81).

|                                                            | <b>Study Cohort<br/>(n=36)</b> | <b>Validation Cohort<br/>(n=81)</b> |
|------------------------------------------------------------|--------------------------------|-------------------------------------|
| <b>Age, median [25th; 75th]</b>                            | 67.1 [56.8; 73.9]              | 64.1 [54.4; 70.3]                   |
| <b>Male, % (n)</b>                                         | 83.3 (30)                      | 85.2 (69)                           |
| <b>Exitus, % (n)</b>                                       | 66.7 (24)                      | 95.1 (77)                           |
| <b>Survival (months), median [25th; 75th]</b>              | 10.4 [6.1; 20.6]               | 11.4 [6.9; 20.1]                    |
| <b>BCLC Stage, % (n)</b>                                   |                                |                                     |
| B                                                          | 25.0 (9)                       | 41.9 (34)                           |
| C                                                          | 75.0 (27)                      | 58.0 (47)                           |
| <b>Cirrhosis Stage, % (n)</b>                              |                                |                                     |
| Child-Pugh Class A                                         | 63.9 (23)                      | 81.5 (66)                           |
| Child-Pugh Class B                                         | 16.7 (6)                       | 14.8 (12)                           |
| Non-cirrhotic liver                                        | 19.4 (7)                       | 3.7 (3)                             |
| <b>Length of Sorafenib treatment, median [25th; 75th]</b>  | 5.5 [4.0; 9.0]                 | 6.7 [3.0; 10.3]                     |
| <b>Extrahepatic Metastasis, %(n)</b>                       | 36.1 (13)                      | 23.5 (19)                           |
| <b>Portal vein invasion, % (n)</b>                         | 44.4 (16)                      | 38.3 (31)                           |
| <b>Total Bilirubin median (mg/dL), [25th; 75th]</b>        | 0.9 [0.5; 1.2]                 | 1.1 [0.7; 1.6]                      |
| <b>Alanine aminotransferase (U/L), median [25th; 75th]</b> | 36.0 [23.0; 65.0]              | 66.0 [46.0; 109.5]                  |

|                                                                  |                      |                      |
|------------------------------------------------------------------|----------------------|----------------------|
| <b>Aspartate aminotransferase<br/>(U/L), median [25th; 75th]</b> | 51.0 [35.0; 67.0]    | 71.5 [48.5; 109.0]   |
| <b>Alkaline phosphatase (U/L),<br/>median [25th; 75th]</b>       | 141.0 [85.3; 193.5]  | 320.0 [227.5; 459.0] |
| <b>Gamma-glutamyl transferase<br/>(U/L), median [25th; 75th]</b> | 153.0 [63.0; 234.0]  | 161.5 [83.5; 280.5]  |
| <b>Albumin (g/dL), median [25th;<br/>75th]</b>                   | 4.0 [3.6; 4.3]       | 3.8 [3.6; 4.2]       |
| <b>Alfa-fetoprotein (ng/mL),<br/>median [25th; 75th]</b>         | 215.5 [19.3; 1462.0] | 26.0 [6.0; 233]      |

**Table S2.** miRNA target prediction according to TargetScan and miRDB databases. UniProt entry ID, gene name and description are provided.

| Database   | miRNA                             | UniProt entry | Gene Name | Description                                                                                                                                                                                        |
|------------|-----------------------------------|---------------|-----------|----------------------------------------------------------------------------------------------------------------------------------------------------------------------------------------------------|
| TargetScan | miR-122-5p<br>Upregulated 6 hours | O60241        | ADGRB2    | Adhesion G protein-coupled receptor B2 (Brain-specific angiogenesis inhibitor 2)                                                                                                                   |
|            |                                   | P04075        | ALDOA     | Fructose-bisphosphate aldolase A (EC 4.1.2.13) (Lung cancer antigen NY-LU-1) (Muscle-type aldolase)                                                                                                |
|            |                                   | Q8IX12        | CCAR1     | Cell division cycle and apoptosis regulator protein 1 (Cell cycle and apoptosis regulatory protein 1) (CARP-1) (Death inducer with SAP domain)                                                     |
|            |                                   | P51959        | CCNG1     | Cyclin-G1 (Cyclin-G)                                                                                                                                                                               |
|            |                                   | Q9NPF0        | CD320     | CD320 antigen (8D6 antigen) (FDC-signaling molecule 8D6) (FDC-SM-8D6) (Transcobalamin receptor) (TCblR) (CD antigen CD320)                                                                         |
|            |                                   | O00299        | CLIC1     | Chloride intracellular channel protein 1 (Chloride channel ABP) (Nuclear chloride ion channel 27) (NCC27) (Regulatory nuclear chloride ion channel protein) (hRNCC)                                |
|            |                                   | Q9Y696        | CLIC4     | Chloride intracellular channel protein 4 (Intracellular chloride ion channel protein p64H1)                                                                                                        |
|            |                                   | P29762        | CRABP1    | Cellular retinoic acid-binding protein 1 (Cellular retinoic acid-binding protein I) (CRABP-I)                                                                                                      |
|            |                                   | O95476        | CTDNEP1   | CTD nuclear envelope phosphatase 1 (EC 3.1.3.16) (Serine/threonine-protein phosphatase dullard)                                                                                                    |
|            |                                   | Q13115        | DUSP4     | Dual specificity protein phosphatase 4 (EC 3.1.3.16) (EC 3.1.3.48) (Dual specificity protein phosphatase hVH2) (Mitogen-activated protein kinase phosphatase 2) (MAP kinase phosphatase 2) (MKP-2) |
|            |                                   | P01588        | EPO       | Erythropoietin (Epoetin)                                                                                                                                                                           |

|  |        |        |                                                                                                                                                                                                                                                                                                                                                                                                                                                            |
|--|--------|--------|------------------------------------------------------------------------------------------------------------------------------------------------------------------------------------------------------------------------------------------------------------------------------------------------------------------------------------------------------------------------------------------------------------------------------------------------------------|
|  | P11678 | EPX    | Eosinophil peroxidase (EPO) (EC 1.11.1.7) [Cleaved into: Eosinophil peroxidase light chain; Eosinophil peroxidase heavy chain]                                                                                                                                                                                                                                                                                                                             |
|  | Q01167 | FOXK2  | Forkhead box protein K2 (G/T-mismatch specific binding protein) (nGTBP) (Interleukin enhancer-binding factor 1)                                                                                                                                                                                                                                                                                                                                            |
|  | Q9BWH2 | FUNDC2 | FUN14 domain-containing protein 2 (Cervical cancer proto-oncogene 3 protein) (HCC-3) (Hepatitis C virus core-binding protein 6)                                                                                                                                                                                                                                                                                                                            |
|  | Q9BUM1 | G6PC3  | Glucose-6-phosphatase 3 (G-6-Pase 3) (G6Pase 3) (EC 3.1.3.9) (Glucose-6-phosphatase beta) (G6Pase-beta) (Ubiquitous glucose-6-phosphatase catalytic subunit-related protein)                                                                                                                                                                                                                                                                               |
|  | Q9NSI5 | IGSF5  | Immunoglobulin superfamily member 5 (IgSF5) (Junctional adhesion molecule 4) (JAM-4)                                                                                                                                                                                                                                                                                                                                                                       |
|  | P48740 | MASP1  | Mannan-binding lectin serine protease 1 (EC 3.4.21.-) (Complement factor MASP-3) (Complement-activating component of Ra-reactive factor) (Mannose-binding lectin-associated serine protease 1) (MASP-1) (Mannose-binding protein-associated serine protease) (Ra-reactive factor serine protease p100) (RaRF) (Serine protease 5) [Cleaved into: Mannan-binding lectin serine protease 1 heavy chain; Mannan-binding lectin serine protease 1 light chain] |
|  | Q86XE3 | MICU3  | Calcium uptake protein 3, mitochondrial (EF-hand domain-containing family member A2)                                                                                                                                                                                                                                                                                                                                                                       |
|  | Q9BSH3 | NICN1  | Nicolin-1 (NPCEDRG) (Tubulin polyglutamylase complex subunit 5) (PGs5)                                                                                                                                                                                                                                                                                                                                                                                     |
|  | P55786 | NPEPPS | Puromycin-sensitive aminopeptidase (PSA) (EC 3.4.11.14) (Cytosol alanyl aminopeptidase) (AAP-S)                                                                                                                                                                                                                                                                                                                                                            |
|  | P13674 | P4HA1  | Prolyl 4-hydroxylase subunit alpha-1 (4-PH alpha-1) (EC 1.14.11.2) (Procollagen-proline,2-oxoglutarate-4-dioxygenase subunit alpha-1)                                                                                                                                                                                                                                                                                                                      |

|  |  |        |          |                                                                                                                                                                                                                                                                                  |
|--|--|--------|----------|----------------------------------------------------------------------------------------------------------------------------------------------------------------------------------------------------------------------------------------------------------------------------------|
|  |  | Q16654 | PDK4     | [Pyruvate dehydrogenase (acetyl-transferring)] kinase isozyme 4, mitochondrial (EC 2.7.11.2) (Pyruvate dehydrogenase kinase isoform 4)                                                                                                                                           |
|  |  | Q96S52 | PIGS     | GPI transamidase component PIG-S (Phosphatidylinositol-glycan biosynthesis class S protein)                                                                                                                                                                                      |
|  |  | Q96CS7 | PLEKHB2  | Pleckstrin homology domain-containing family B member 2 (PH domain-containing family B member 2) (Evectin-2)                                                                                                                                                                     |
|  |  | O75569 | PRKRA    | Interferon-inducible double-stranded RNA-dependent protein kinase activator A (PKR-associated protein X) (PKR-associating protein X) (Protein activator of the interferon-induced protein kinase) (Protein kinase, interferon-inducible double-stranded RNA-dependent activator) |
|  |  | P82980 | RBP5     | Retinol-binding protein 5 (Cellular retinol-binding protein III) (CRBP-III) (HRBPiso)                                                                                                                                                                                            |
|  |  | O00287 | RFXAP    | Regulatory factor X-associated protein (RFX-associated protein) (RFX DNA-binding complex 36 kDa subunit)                                                                                                                                                                         |
|  |  | Q86UR5 | RIMS1    | Regulating synaptic membrane exocytosis protein 1 (Rab-3-interacting molecule 1) (RIM 1) (Rab-3-interacting protein 2)                                                                                                                                                           |
|  |  | Q15758 | SLC1A5   | Neutral amino acid transporter B(0) (ATB(0)) (Baboon M7 virus receptor) (RD114/simian type D retrovirus receptor) (Sodium-dependent neutral amino acid transporter type 2) (Solute carrier family 1 member 5)                                                                    |
|  |  | Q6PIV7 | SLC25A34 | Solute carrier family 25 member 34                                                                                                                                                                                                                                               |
|  |  | Q9HAB3 | SLC52A2  | Solute carrier family 52, riboflavin transporter, member 2 (Porcine endogenous retrovirus A receptor 1) (PERV-A receptor 1) (Protein GPR172A) (Riboflavin transporter 3) (hRFT3)                                                                                                 |

|       |  |        |            |                                                                                                                                                                                                                                                                                       |
|-------|--|--------|------------|---------------------------------------------------------------------------------------------------------------------------------------------------------------------------------------------------------------------------------------------------------------------------------------|
|       |  | P30825 | SLC7A1     | High affinity cationic amino acid transporter 1 (CAT-1) (CAT1) (Ecotropic retroviral leukemia receptor homolog) (Ecotropic retrovirus receptor homolog) (Solute carrier family 7 member 1) (System Y+ basic amino acid transporter)                                                   |
|       |  | Q9H4F1 | ST6GALNAC4 | Alpha-N-acetyl-neuraminy1-2,3-beta-galactosyl-1,3-N-acetyl-galactosaminide alpha-2,6-sialyltransferase (EC 2.4.99.7) (NeuAc-alpha-2,3-Gal-beta-1,3-GalNAc-alpha-2,6-sialyltransferase) (ST6GalNAc IV) (ST6GalNAcIV) (Sialyltransferase 3C) (SIAT3-C) (Sialyltransferase 7D) (SIAT7-D) |
| miRDB |  | Q16650 | TBR1       | T-box brain protein 1 (T-brain-1) (TBR-1) (TES-56)                                                                                                                                                                                                                                    |
|       |  | Q17R98 | ZNF827     | Zinc finger protein 827                                                                                                                                                                                                                                                               |
|       |  | Q8NFV4 | ABHD11     | abhydrolase domain containing 11                                                                                                                                                                                                                                                      |
|       |  | O14672 | ADAM10     | ADAM metallopeptidase domain 10                                                                                                                                                                                                                                                       |
|       |  | O60241 | ADGRB2     | adhesion G protein-coupled receptor B2                                                                                                                                                                                                                                                |
|       |  | P30520 | ADSS       | adenylosuccinate synthase                                                                                                                                                                                                                                                             |
|       |  | Q8N6S4 | ANKRD13C   | ankyrin repeat domain 13C                                                                                                                                                                                                                                                             |
|       |  | Q9Y6D6 | ARFGEF1    | ADP ribosylation factor guanine nucleotide exchange factor 1                                                                                                                                                                                                                          |
|       |  | P55201 | BRPF1      | bromodomain and PHD finger containing 1                                                                                                                                                                                                                                               |
|       |  | Q5BKX5 | C19orf54   | chromosome 19 open reading frame 54                                                                                                                                                                                                                                                   |
|       |  | Q9NYP8 | C21orf62   | chromosome 21 open reading frame 62                                                                                                                                                                                                                                                   |
|       |  | Q9NS85 | CA10       | carbonic anhydrase 10                                                                                                                                                                                                                                                                 |
|       |  | Q7Z3E2 | CCDC186    | coiled-coil domain containing 186                                                                                                                                                                                                                                                     |
|       |  | P51959 | CCNG1      | cyclin G1                                                                                                                                                                                                                                                                             |
|       |  | Q9NPF0 | CD320      | CD320 molecule                                                                                                                                                                                                                                                                        |
|       |  | P29965 | CD40LG     | CD40 ligand                                                                                                                                                                                                                                                                           |
|       |  | Q9Y696 | CLIC4      | chloride intracellular channel 4                                                                                                                                                                                                                                                      |
|       |  | Q9NZA1 | CLIC5      | chloride intracellular channel 5                                                                                                                                                                                                                                                      |
|       |  | Q9BZB8 | CPEB1      | cytoplasmic polyadenylation element binding protein 1                                                                                                                                                                                                                                 |



|  |        |         |                                                                 |
|--|--------|---------|-----------------------------------------------------------------|
|  | O75390 | CS      | citrate synthase                                                |
|  | O95476 | CTDNEP1 | CTD nuclear envelope phosphatase 1                              |
|  | Q9UI47 | CTNNA3  | catenin alpha 3                                                 |
|  | P39880 | CUX1    | cut like homeobox 1                                             |
|  | Q6UW02 | CYP20A1 | cytochrome P450 family 20 subfamily A member 1                  |
|  | Q16832 | DDR2    | discoidin domain receptor tyrosine kinase 2                     |
|  | Q9UPY3 | DICER1  | dicer 1, ribonuclease III                                       |
|  | Q9P225 | DNAH2   | dynein axonemal heavy chain 2                                   |
|  | Q5T9C2 | FAM102A | family with sequence similarity 102 member A                    |
|  | Q13451 | FKBP5   | FKBP prolyl isomerase 5                                         |
|  | O75369 | FLNB    | filamin B                                                       |
|  | Q9BWH2 | FUNDC2  | FUN14 domain containing 2                                       |
|  | P11413 | G6PD    | glucose-6-phosphate dehydrogenase                               |
|  | P34903 | GABRA3  | gamma-aminobutyric acid type A receptor alpha3 subunit          |
|  | Q10472 | GALNT1  | polypeptide N-acetylgalactosaminyltransferase 1                 |
|  | Q9Y2X7 | GIT1    | GIT ArfGAP 1                                                    |
|  | Q8TDQ7 | GNPDA2  | glucosamine-6-phosphate deaminase 2                             |
|  | P30550 | GRPR    | gastrin releasing peptide receptor                              |
|  | P13807 | GYS1    | glycogen synthase 1                                             |
|  | Q5T447 | HECTD3  | HECT domain E3 ubiquitin protein ligase 3                       |
|  | Q9P2P5 | HECW2   | HECT, C2 and WW domain containing E3 ubiquitin protein ligase 2 |
|  | Q00839 | HNRNPU  | heterogeneous nuclear ribonucleoprotein U                       |
|  | Q9NSI5 | IGSF5   | immunoglobulin superfamily member 5                             |
|  | Q9UGI6 | KCNN3   | potassium calcium-activated channel subfamily N member 3        |
|  | P52732 | KIF11   | kinesin family member 11                                        |
|  | P11047 | LAMC1   | laminin subunit gamma 1                                         |
|  | Q12852 | MAP3K12 | mitogen-activated protein kinase kinase kinase 12               |
|  | Q03112 | MECOM   | MDS1 and EVI1 complex locus                                     |

|        |          |                                                         |
|--------|----------|---------------------------------------------------------|
| Q86XE3 | MICU3    | mitochondrial calcium uptake family member 3            |
| Q8TD10 | MIPOL1   | mirror-image polydactyly 1                              |
| Q9UJG1 | MOSPD1   | motile sperm domain containing 1                        |
| B2RTY4 | MYO9A    | myosin IXA                                              |
| Q8IZQ8 | MYOCD    | myocardin                                               |
| Q96MY1 | NOL4L    | nucleolar protein 4 like                                |
| Q16625 | OCLN     | occludin                                                |
| P13674 | P4HA1    | prolyl 4-hydroxylase subunit alpha 1                    |
| Q16654 | PKD4     | pyruvate dehydrogenase kinase 4                         |
| P48426 | PIP4K2A  | phosphatidylinositol-5-phosphate 4-kinase type 2 alpha  |
| P14618 | PKM      | pyruvate kinase M1/2                                    |
| Q96HE9 | PRR11    | proline rich 11                                         |
| O95758 | PTBP3    | polypyrimidine tract binding protein 3                  |
| Q3YEC7 | RABL6    | RAB, member RAS oncogene family like 6                  |
| Q86VV4 | RANBP3L  | RAN binding protein 3 like                              |
| Q8IY67 | RAVER1   | ribonucleoprotein, PTB binding 1                        |
| P28749 | RBL1     | RB transcriptional corepressor like 1                   |
| Q6ZSC3 | RBM43    | RNA binding motif protein 43                            |
| A0AV96 | RBM47    | RNA binding motif protein 47                            |
| Q15434 | RBMS2    | RNA binding motif single stranded interacting protein 2 |
| Q9BRL7 | SEC22C   | SEC22 homolog C, vesicle trafficking protein            |
| Q92854 | SEMA4D   | semaphorin 4D                                           |
| P58004 | SESN2    | sestrin 2                                               |
| Q149N8 | SHPRH    | SNF2 histone linker PHD RING helicase                   |
| Q6PIV7 | SLC25A34 | solute carrier family 25 member 34                      |
| Q2Y0W8 | SLC4A8   | solute carrier family 4 member 8                        |
| Q9HAB3 | SLC52A2  | solute carrier family 52 member 2                       |
| P30825 | SLC7A1   | solute carrier family 7 member 1                        |
| Q8TBB6 | SLC7A14  | solute carrier family 7 member 14                       |

|            |                                         |        |          |                                                                                                                                                      |
|------------|-----------------------------------------|--------|----------|------------------------------------------------------------------------------------------------------------------------------------------------------|
|            |                                         | Q9H2Y9 | SLCO5A1  | solute carrier organic anion transporter family member 5A1                                                                                           |
|            |                                         | Q96GM5 | SMARCD1  | SWI/SNF related, matrix associated, actin dependent regulator of chromatin, subfamily d, member 1                                                    |
|            |                                         | Q8IYR2 | SMYD4    | SET and MYND domain containing 4                                                                                                                     |
|            |                                         | O43597 | SPRY2    | sprouty RTK signaling antagonist 2                                                                                                                   |
|            |                                         | Q93045 | STMN2    | stathmin 2                                                                                                                                           |
|            |                                         | Q4KMP7 | TBC1D10B | TBC1 domain family member 10B                                                                                                                        |
|            |                                         | Q9NU19 | TBC1D22B | TBC1 domain family member 22B                                                                                                                        |
|            |                                         | Q16650 | TBR1     | T-box, brain 1                                                                                                                                       |
|            |                                         | Q8WVM0 | TFB1M    | transcription factor B1, mitochondrial                                                                                                               |
|            |                                         | Q7Z4N2 | TRPM1    | transient receptor potential cation channel subfamily M member 1                                                                                     |
|            |                                         | Q9UHF7 | TRPS1    | transcriptional repressor GATA binding 1                                                                                                             |
|            |                                         | Q9BQE3 | TUBA1C   | tubulin alpha 1c                                                                                                                                     |
|            |                                         | O94888 | UBXN7    | UBX domain protein 7                                                                                                                                 |
|            |                                         | Q15836 | VAMP3    | vesicle associated membrane protein 3                                                                                                                |
|            |                                         | O94967 | WDR47    | WD repeat domain 47                                                                                                                                  |
|            |                                         | O14771 | ZNF213   | zinc finger protein 213                                                                                                                              |
|            |                                         | Q17R98 | ZNF827   | zinc finger protein 827                                                                                                                              |
|            |                                         | Q86W11 | ZSCAN30  | zinc finger and SCAN domain containing 30                                                                                                            |
| TargetScan | miR-148-3p<br>Downregulated 24<br>hours | Q9HCK5 | AGO4     | Protein argonaute-4 (Argonaute4) (hAgo4) (Argonaute RISC catalytic component 4) (Eukaryotic translation initiation factor 2C 4) (eIF-2C 4) (eIF2C 4) |
|            |                                         | O75027 | ABCB7    | ATP-binding cassette sub-family B member 7, mitochondrial (ATP-binding cassette transporter 7) (ABC transporter 7 protein)                           |
|            |                                         | P28288 | ABCD3    | ATP-binding cassette sub-family D member 3 (70 kDa peroxisomal membrane protein) (PMP70)                                                             |

|  |  |        |         |                                                                                                                                                                                                                                        |
|--|--|--------|---------|----------------------------------------------------------------------------------------------------------------------------------------------------------------------------------------------------------------------------------------|
|  |  | Q04771 | ACVR1   | Activin receptor type-1 (EC 2.7.11.30) (Activin receptor type I) (ACTR-I) (Activin receptor-like kinase 2) (ALK-2) (Serine/threonine-protein kinase receptor R1) (SKR1) (TGF-B superfamily receptor type I) (TSR-I)                    |
|  |  | Q9UNA0 | ADAMTS5 | A disintegrin and metalloproteinase with thrombospondin motifs 5 (ADAM-TS 5) (ADAM-TS5) (ADAMTS-5) (EC 3.4.24.-) (A disintegrin and metalloproteinase with thrombospondin motifs 11) (ADAM-TS 11) (ADAMTS-11) (ADMP-2) (Aggrecanase-2) |
|  |  | O60242 | ADGRB3  | Adhesion G protein-coupled receptor B3 (Brain-specific angiogenesis inhibitor 3)                                                                                                                                                       |
|  |  | P52594 | AGFG1   | Arf-GAP domain and FG repeat-containing protein 1 (HIV-1 Rev-binding protein) (Nucleoporin-like protein RIP) (Rev-interacting protein) (Rev/Rex activation domain-binding protein)                                                     |
|  |  | Q5TGY3 | AHDC1   | AT-hook DNA-binding motif-containing protein 1                                                                                                                                                                                         |
|  |  | P53367 | ARFIP1  | Arfaptin-1 (ADP-ribosylation factor-interacting protein 1)                                                                                                                                                                             |
|  |  | Q9NVJ2 | ARL8B   | ADP-ribosylation factor-like protein 8B (ADP-ribosylation factor-like protein 10C) (Novel small G protein indispensable for equal chromosome segregation 1)                                                                            |
|  |  | Q96B67 | ARRDC3  | Arrestin domain-containing protein 3 (TBP-2-like inducible membrane protein) (TLIMP)                                                                                                                                                   |
|  |  | P23634 | ATP2B4  | Plasma membrane calcium-transporting ATPase 4 (PMCA4) (EC 7.2.2.10) (Matrix-remodeling-associated protein 1) (Plasma membrane calcium ATPase isoform 4) (Plasma membrane calcium pump isoform 4)                                       |

|  |  |        |         |                                                                                                                                                                                                                                                                                                                                                                                                                                                       |
|--|--|--------|---------|-------------------------------------------------------------------------------------------------------------------------------------------------------------------------------------------------------------------------------------------------------------------------------------------------------------------------------------------------------------------------------------------------------------------------------------------------------|
|  |  | O75787 | ATP6AP2 | Renin receptor (ATPase H(+)-transporting lysosomal accessory protein 2) (ATPase H(+)-transporting lysosomal-interacting protein 2) (ER-localized type I transmembrane adaptor) (Embryonic liver differentiation factor 10) (N14F) (Renin/prorenin receptor) (Vacuolar ATP synthase membrane sector-associated protein M8-9) (ATP6M8-9) (V-ATPase M8.9 subunit) [Cleaved into: Renin receptor N-terminal fragment; Renin receptor C-terminal fragment] |
|  |  | O43286 | B4GALT5 | Beta-1,4-galactosyltransferase 5 (Beta-1,4-GalTase 5) (Beta4Gal-T5) (b4Gal-T5) (EC 2.4.1.-) (Beta-1,4-GalT II) (Glucosylceramide beta-1,4-galactosyltransferase) (EC 2.4.1.274) (Lactosylceramide synthase) (LacCer synthase) (UDP-Gal:beta-GlcNAc beta-1,4-galactosyltransferase 5) (UDP-galactose:beta-N-acetylglucosamine beta-1,4-galactosyltransferase 5)                                                                                        |
|  |  | Q9UBX8 | B4GALT6 | Beta-1,4-galactosyltransferase 6 (Beta-1,4-GalTase 6) (Beta4Gal-T6) (b4Gal-T6) (EC 2.4.1.-) (Glucosylceramide beta-1,4-galactosyltransferase) (EC 2.4.1.274) (Lactosylceramide synthase) (LacCer synthase) (UDP-Gal:beta-GlcNAc beta-1,4-galactosyltransferase 6) (UDP-Gal:glucosylceramide beta-1,4-galactosyltransferase) (UDP-galactose:beta-N-acetylglucosamine beta-1,4-galactosyltransferase 6)                                                 |
|  |  | Q9NY43 | BARHL2  | BarH-like 2 homeobox protein                                                                                                                                                                                                                                                                                                                                                                                                                          |
|  |  | Q9C0J9 | BHLHE41 | Protein BEX3 (Brain-expressed X-linked protein 3) (Nerve growth factor receptor-associated protein 1) (Ovarian granulosa cell 13.0 kDa protein HGR74) (p75NTR-associated cell death executor)                                                                                                                                                                                                                                                         |
|  |  | Q9H694 | BICC1   | Class E basic helix-loop-helix protein 41 (bHLHe41) (Class B basic helix-loop-helix protein 3) (bHLHb3) (Differentially expressed in chondrocytes protein 2) (hDEC2) (Enhancer-of-split and hairy-related protein 1) (SHARP-1)                                                                                                                                                                                                                        |

|       |        |          |                                                                                                                                                                                                     |
|-------|--------|----------|-----------------------------------------------------------------------------------------------------------------------------------------------------------------------------------------------------|
|       | O14981 | BTAF1    | Protein bicaudal C homolog 1 (Bic-C)                                                                                                                                                                |
|       | Q9Y2F9 | BTBD3    | TATA-binding protein-associated factor 172 (EC 3.6.4.-) (ATP-dependent helicase BTAF1) (B-TFIID transcription factor-associated 170 kDa subunit) (TAF(II)170) (TBP-associated factor 172) (TAF-172) |
| miRDB | Q9UL18 | AGO1     | argonaute RISC catalytic component 1                                                                                                                                                                |
|       | Q9HCK5 | AGO4     | argonaute RISC catalytic component 4                                                                                                                                                                |
|       | Q9UNA3 | A4GNT    | alpha-1,4-N-acetylglucosaminyltransferase                                                                                                                                                           |
|       | O95477 | ABCA1    | ATP binding cassette subfamily A member 1                                                                                                                                                           |
|       | O75027 | ABCB7    | ATP binding cassette subfamily B member 7                                                                                                                                                           |
|       | P28288 | ABCD3    | ATP binding cassette subfamily D member 3                                                                                                                                                           |
|       | Q04771 | ACVR1    | activin A receptor type 1                                                                                                                                                                           |
|       | O14672 | ADAM10   | ADAM metallopeptidase domain 10                                                                                                                                                                     |
|       | P78536 | ADAM17   | ADAM metallopeptidase domain 17                                                                                                                                                                     |
|       | Q9P0K1 | ADAM22   | ADAM metallopeptidase domain 22                                                                                                                                                                     |
|       | O75077 | ADAM23   | ADAM metallopeptidase domain 23                                                                                                                                                                     |
|       | Q8TE58 | ADAMTS15 | ADAM metallopeptidase with thrombospondin type 1 motif 15                                                                                                                                           |
|       | Q8TE59 | ADAMTS19 | ADAM metallopeptidase with thrombospondin type 1 motif 19                                                                                                                                           |
|       | Q08462 | ADCY2    | adenylate cyclase 2                                                                                                                                                                                 |
|       | O60242 | ADGRB3   | adhesion G protein-coupled receptor B3                                                                                                                                                              |
|       | Q8IZF2 | ADGRF5   | adhesion G protein-coupled receptor F5                                                                                                                                                              |
|       | P52594 | AGFG1    | ArfGAP with FG repeats 1                                                                                                                                                                            |
|       | Q5TGY3 | AHDC1    | AT-hook DNA binding motif containing 1                                                                                                                                                              |
|       | Q92667 | AKAP1    | A-kinase anchoring protein 1                                                                                                                                                                        |
|       | Q13740 | ALCAM    | activated leukocyte cell adhesion molecule                                                                                                                                                          |
|       | Q5VTE6 | ANGEL2   | angel homolog 2                                                                                                                                                                                     |
|       | P09525 | ANXA4    | annexin A4                                                                                                                                                                                          |
|       | Q9UPM8 | AP4E1    | adaptor related protein complex 4 subunit epsilon 1                                                                                                                                                 |
|       | P18085 | ARF4     | ADP ribosylation factor 4                                                                                                                                                                           |

|        |          |                                                                                    |
|--------|----------|------------------------------------------------------------------------------------|
| P53367 | ARFIP1   | ADP ribosylation factor interacting protein 1                                      |
| Q5T5U3 | ARHGAP21 | Rho GTPase activating protein 21                                                   |
| Q9NZN5 | ARHGEF12 | Rho guanine nucleotide exchange factor 12                                          |
| Q15041 | ARL6IP1  | ADP ribosylation factor like GTPase 6 interacting protein 1                        |
| Q9NVJ2 | ARL8B    | ADP ribosylation factor like GTPase 8B                                             |
| Q96B67 | ARRDC3   | arrestin domain containing 3                                                       |
| Q6ZNE5 | ATG14    | autophagy related 14                                                               |
| P98196 | ATP11A   | ATPase phospholipid transporting 11A                                               |
| P23634 | ATP2B4   | ATPase plasma membrane Ca <sup>2+</sup> transporting 4                             |
| P51164 | ATP4B    | ATPase H <sup>+</sup> /K <sup>+</sup> transporting subunit beta                    |
| O75787 | ATP6AP2  | ATPase H <sup>+</sup> transporting accessory protein 2                             |
| Q9Y2Q0 | ATP8A1   | ATPase phospholipid transporting 8A1                                               |
| P54253 | ATXN1    | ataxin 1                                                                           |
| Q9ULK2 | ATXN7L1  | ataxin 7 like 1                                                                    |
| O43286 | B4GALT5  | beta-1,4-galactosyltransferase 5                                                   |
| Q9UBX8 | B4GALT6  | beta-1,4-galactosyltransferase 6                                                   |
| Q9BYV9 | BACH2    | BTB domain and CNC homolog 2                                                       |
| Q9UIF8 | BAZ2B    | bromodomain adjacent to zinc finger domain 2B                                      |
| O43521 | BCL2L11  | BCL2 like 11                                                                       |
| Q9H694 | BICC1    | BicC family RNA binding protein 1                                                  |
| P12645 | BMP3     | bone morphogenetic protein 3                                                       |
| P55201 | BRPF1    | bromodomain and PHD finger containing 1                                            |
| O14981 | BTAF1    | B-TFIID TATA-box binding protein associated factor 1                               |
| Q9BSF8 | BTBD10   | BTB domain containing 10                                                           |
| Q9Y2F9 | BTBD3    | BTB domain containing 3                                                            |
| Q96B23 | C18orf25 | chromosome 18 open reading frame 25                                                |
| Q9NS00 | C1GALT1  | core 1 synthase, glycoprotein-N-acetylgalactosamine 3-beta-galactosyltransferase 1 |
| Q96GV9 | C5orf30  | chromosome 5 open reading frame 30                                                 |

|  |        |         |                                                                  |
|--|--------|---------|------------------------------------------------------------------|
|  | Q86V35 | CABP7   | calcium binding protein 7                                        |
|  | Q9BY67 | CADM1   | cell adhesion molecule 1                                         |
|  | Q08AD1 | CAMSAP2 | calmodulin regulated spectrin associated protein family member 2 |
|  | Q86VP6 | CAND1   | cullin associated and neddylation dissociated 1                  |
|  | P27824 | CANX    | calnexin                                                         |
|  | Q86V15 | CASZ1   | castor zinc finger 1                                             |
|  | Q13191 | CBLB    | Cbl proto-oncogene B                                             |
|  | Q75N03 | CBLL1   | Cbl proto-oncogene like 1                                        |
|  | Q6ZP82 | CCDC141 | coiled-coil domain containing 141                                |
|  | Q16204 | CCDC6   | coiled-coil domain containing 6                                  |
|  | P32239 | CCKBR   | cholecystokinin B receptor                                       |
|  | P40227 | CCT6A   | chaperonin containing TCP1 subunit 6A                            |
|  | P21854 | CD72    | CD72 molecule                                                    |
|  | Q9UNH5 | CDC14A  | cell division cycle 14A                                          |
|  | Q9HBT6 | CDH20   | cadherin 20                                                      |
|  | Q9BWU1 | CDK19   | cyclin dependent kinase 19                                       |
|  | Q15078 | CDK5R1  | cyclin dependent kinase 5 regulatory subunit 1                   |
|  | O76039 | CDKL5   | cyclin dependent kinase like 5                                   |
|  | P46527 | CDKN1B  | cyclin dependent kinase inhibitor 1B                             |
|  | Q92903 | CDS1    | CDP-diacylglycerol synthase 1                                    |
|  | Q9NYQ6 | CELSR1  | cadherin EGF LAG seven-pass G-type receptor 1                    |
|  | Q53EZ4 | CEP55   | centrosomal protein 55                                           |
|  | Q6ZMG9 | CERS6   | ceramide synthase 6                                              |
|  | Q9Y281 | CFL2    | cofilin 2                                                        |
|  | Q9P2D1 | CHD7    | chromodomain helicase DNA binding protein 7                      |
|  | O15111 | CHUK    | conserved helix-loop-helix ubiquitous kinase                     |
|  | P33076 | CIITA   | class II major histocompatibility complex transactivator         |
|  | P51797 | CLCN6   | chloride voltage-gated channel 6                                 |



|        |          |                                                              |
|--------|----------|--------------------------------------------------------------|
| P09496 | CLTA     | clathrin light chain A                                       |
| Q8IWV2 | CNTN4    | contactin 4                                                  |
| Q96NU0 | CNTNAP3B | contactin associated protein like 3B                         |
| P02462 | COL4A1   | collagen type IV alpha 1 chain                               |
| O75390 | CS       | citrate synthase                                             |
| P09603 | CSF1     | colony stimulating factor 1                                  |
| P10619 | CTSA     | cathepsin A                                                  |
| Q93034 | CUL5     | cullin 5                                                     |
| Q7L1T6 | CYB5R4   | cytochrome b5 reductase 4                                    |
| O43739 | CYTH3    | cytohesin 3                                                  |
| Q8IU60 | DCP2     | decapping mRNA 2                                             |
| P26196 | DDX6     | DEAD-box helicase 6                                          |
| Q5VZ89 | DENND4C  | DENN domain containing 4C                                    |
| Q9UPY3 | DICER1   | dicer 1, ribonuclease III                                    |
| Q15700 | DLG2     | discs large MAGUK scaffold protein 2                         |
| Q9Y485 | DMXL1    | Dmx like 1                                                   |
| P26358 | DNMT1    | DNA methyltransferase 1                                      |
| Q96HP0 | DOCK6    | dedicator of cytokinesis 6                                   |
| P28562 | DUSP1    | dual specificity phosphatase 1                               |
| Q92630 | DYRK2    | dual specificity tyrosine phosphorylation regulated kinase 2 |
| Q96AV8 | E2F7     | E2F transcription factor 7                                   |
| P52799 | EFNB2    | ephrin B2                                                    |
| Q12926 | ELAVL2   | ELAV like RNA binding protein 2                              |
| P26378 | ELAVL4   | ELAV like RNA binding protein 4                              |
| Q5NDL2 | EOGT     | EGF domain specific O-linked N-acetylglucosamine transferase |
| Q99814 | EPAS1    | endothelial PAS domain protein 1                             |
| O95278 | EPM2A    | EPM2A, laforin glucan phosphatase                            |
| O95208 | EPN2     | epsin 2                                                      |
| P42566 | EPS15    | epidermal growth factor receptor pathway substrate 15        |

|  |        |         |                                                     |
|--|--------|---------|-----------------------------------------------------|
|  | P21860 | ERBB3   | erb-b2 receptor tyrosine kinase 3                   |
|  | Q9UJM3 | ERRFI1  | ERBB receptor feedback inhibitor 1                  |
|  | P03372 | ESR1    | estrogen receptor 1                                 |
|  | P62508 | ESRRG   | estrogen related receptor gamma                     |
|  | Q99504 | EYA3    | EYA transcriptional coactivator and phosphatase 3   |
|  | P13726 | F3      | coagulation factor III, tissue factor               |
|  | Q969W3 | FAM104A | family with sequence similarity 104 member A        |
|  | Q3B820 | FAM161A | FAM161A, centrosomal protein                        |
|  | A1KXE4 | FAM168B | family with sequence similarity 168 member B        |
|  | Q9H0X4 | FAM234A | family with sequence similarity 234 member A        |
|  | Q8N2R8 | FAM43A  | family with sequence similarity 43 member A         |
|  | P35555 | FBN1    | fibrillin 1                                         |
|  | Q9UHY8 | FEZ2    | fasciculation and elongation protein zeta 2         |
|  | Q06787 | FMR1    | fragile X mental retardation 1                      |
|  | Q12946 | FOXF1   | forkhead box F1                                     |
|  | P51114 | FXR1    | FMR1 autosomal homolog 1                            |
|  | P24522 | GADD45A | growth arrest and DNA damage inducible alpha        |
|  | P17677 | GAP43   | growth associated protein 43                        |
|  | Q86SX6 | GLRX5   | glutaredoxin 5                                      |
|  | P60983 | GMFB    | glia maturation factor beta                         |
|  | Q9UKJ3 | GPATCH8 | G-patch domain containing 8                         |
|  | Q9NPB8 | GPCPD1  | glycerophosphocholine phosphodiesterase 1           |
|  | P51674 | GPM6A   | glycoprotein M6A                                    |
|  | Q8N3F9 | GPR137C | G protein-coupled receptor 137C                     |
|  | Q8NFJ5 | GPRC5A  | G protein-coupled receptor class C group 5 member A |
|  | O43424 | GRID2   | glutamate ionotropic receptor delta type subunit 2  |
|  | P32780 | GTF2H1  | general transcription factor IIH subunit 1          |
|  | O75367 | H2AFY   | H2A histone family member Y                         |
|  | Q9Y450 | HBS1L   | HBS1 like translational GTPase                      |

|  |        |          |                                                                 |
|--|--------|----------|-----------------------------------------------------------------|
|  | Q9P2P5 | HECW2    | HECT, C2 and WW domain containing E3 ubiquitin protein ligase 2 |
|  | Q86YM7 | HOMER1   | homer scaffold protein 1                                        |
|  | P31273 | HOXC8    | homeobox C8                                                     |
|  | P24593 | IGFBP5   | insulin like growth factor binding protein 5                    |
|  | P40933 | IL15     | interleukin 15                                                  |
|  | Q9H160 | ING2     | inhibitor of growth family member 2                             |
|  | P09529 | INHBB    | inhibin subunit beta B                                          |
|  | Q9ULG1 | INO80    | INO80 complex subunit                                           |
|  | B1AKI9 | ISM1     | isthmin 1                                                       |
|  | P08648 | ITGA5    | integrin subunit alpha 5                                        |
|  | Q13797 | ITGA9    | integrin subunit alpha 9                                        |
|  | P26012 | ITGB8    | integrin subunit beta 8                                         |
|  | Q13572 | ITPK1    | inositol-tetrakisphosphate 1-kinase                             |
|  | Q9NZM3 | ITSN2    | intersectin 2                                                   |
|  | Q92833 | JARID2   | jumonji and AT-rich interaction domain containing 2             |
|  | Q8N9B5 | JMY      | junction mediating and regulatory protein, p53 cofactor         |
|  | O95251 | KAT7     | lysine acetyltransferase 7                                      |
|  | Q68DU8 | KCTD16   | potassium channel tetramerization domain containing 16          |
|  | Q6ZMT4 | KDM7A    | lysine demethylase 7A                                           |
|  | Q92628 | KIAA0232 | KIAA0232                                                        |
|  | Q5T5P2 | KIAA1217 | KIAA1217                                                        |
|  | Q15058 | KIF14    | kinesin family member 14                                        |
|  | O43474 | KLF4     | Kruppel like factor 4                                           |
|  | Q13887 | KLF5     | Kruppel like factor 5                                           |
|  | Q99612 | KLF6     | Kruppel like factor 6                                           |
|  | Q03164 | KMT2A    | lysine methyltransferase 2A                                     |
|  | Q01546 | KRT76    | keratin 76                                                      |
|  | Q14739 | LBR      | lamin B receptor                                                |

|        |          |                                                          |
|--------|----------|----------------------------------------------------------|
| P01130 | LDLR     | low density lipoprotein receptor                         |
| O95214 | LEPROTL1 | leptin receptor overlapping transcript like 1            |
| P38571 | LIPA     | lipase A, lysosomal acid type                            |
| Q8IWU2 | LMTK2    | lemur tyrosine kinase 2                                  |
| P98164 | LRP2     | LDL receptor related protein 2                           |
| Q15345 | LRRC41   | leucine rich repeat containing 41                        |
| Q14766 | LTBP1    | latent transforming growth factor beta binding protein 1 |
| Q8IV50 | LYSMD2   | LysM domain containing 2                                 |
| Q9Y5Q3 | MAFB     | MAF bZIP transcription factor B                          |
| O15525 | MAFG     | MAF bZIP transcription factor G                          |
| Q02750 | MAP2K1   | mitogen-activated protein kinase kinase 1                |
| Q9Y6R4 | MAP3K4   | mitogen-activated protein kinase kinase kinase 4         |
| P80192 | MAP3K9   | mitogen-activated protein kinase kinase kinase 9         |
| Q9P1T7 | MDFIC    | MyoD family inhibitor domain containing                  |
| Q86YW9 | MED12L   | mediator complex subunit 12 like                         |
| P50222 | MEOX2    | mesenchyme homeobox 2                                    |
| Q8N108 | MIER1    | MIER1 transcriptional regulator                          |
| O75030 | MITF     | melanocyte inducing transcription factor                 |
| P55197 | MLLT10   | MLLT10, histone lysine methyltransferase DOT1L cofactor  |
| P55198 | MLLT6    | MLLT6, PHD finger containing                             |
| Q15546 | MMD      | monocyte to macrophage differentiation associated        |
| P09238 | MMP10    | matrix metalloproteinase 10                              |
| P45452 | MMP13    | matrix metalloproteinase 13                              |
| P51511 | MMP15    | matrix metalloproteinase 15                              |
| Q99583 | MNT      | MAX network transcriptional repressor                    |
| Q9UJG1 | MOSPD1   | motile sperm domain containing 1                         |
| P40238 | MPL      | MPL proto-oncogene, thrombopoietin receptor              |
| O14807 | MRAS     | muscle RAS oncogene homolog                              |
| Q96LB0 | MRGPRX3  | MAS related GPR family member X3                         |

|        |         |                                            |
|--------|---------|--------------------------------------------|
| Q9Y4B5 | MTCL1   | microtubule crosslinking factor 1          |
| Q9NXD2 | MTMR10  | myotubularin related protein 10            |
| Q8NCE2 | MTMR14  | myotubularin related protein 14            |
| Q96QG7 | MTMR9   | myotubularin related protein 9             |
| Q05195 | MXD1    | MAX dimerization protein 1                 |
| Q8WUY8 | NAT14   | N-acetyltransferase 14 (putative)          |
| Q9NZQ3 | NCKIPSD | NCK interacting protein with SH3 domain    |
| Q15788 | NCOA1   | nuclear receptor coactivator 1             |
| Q96JN8 | NEURL4  | neuralized E3 ubiquitin protein ligase 4   |
| O94916 | NFAT5   | nuclear factor of activated T cells 5      |
| Q6T4R5 | NHS     | NHS actin remodeling regulator             |
| Q9Y5B8 | NME7    | NME/NM23 family member 7                   |
| Q13253 | NOG     | noggin                                     |
| O94818 | NOL4    | nucleolar protein 4                        |
| Q96MY1 | NOL4L   | nucleolar protein 4 like                   |
| Q8NDH3 | NPEPL1  | aminopeptidase like 1                      |
| Q9Y639 | NPTN    | neuroplastin                               |
| Q15818 | NPTX1   | neuronal pentraxin 1                       |
| Q86WQ0 | NR2C2AP | nuclear receptor 2C2 associated protein    |
| Q7Z6K4 | NRARP   | NOTCH regulated ankyrin repeat protein     |
| O14786 | NRP1    | neuropilin 1                               |
| Q9H0P0 | NT5C3A  | 5'-nucleotidase, cytosolic IIIA            |
| Q9BXB4 | OSBPL11 | oxysterol binding protein like 11          |
| Q01804 | OTUD4   | OTU deubiquitinase 4                       |
| Q14123 | PDE1C   | phosphodiesterase 1C                       |
| Q9H792 | PEAK1   | pseudopodium enriched atypical kinase 1    |
| O15173 | PGRMC2  | progesterone receptor membrane component 2 |
| O75167 | PHACTR2 | phosphatase and actin regulator 2          |
| Q9BVI0 | PHF20   | PHD finger protein 20                      |

|  |        |          |                                                                          |
|--|--------|----------|--------------------------------------------------------------------------|
|  | Q92576 | PHF3     | PHD finger protein 3                                                     |
|  | P37287 | PIGA     | phosphatidylinositol glycan anchor biosynthesis class A                  |
|  | Q96S52 | PIGS     | phosphatidylinositol glycan anchor biosynthesis class S                  |
|  | O00443 | PIK3C2A  | phosphatidylinositol-4-phosphate 3-kinase catalytic subunit type 2 alpha |
|  | Q9BZ72 | PITPNM2  | phosphatidylinositol transfer protein membrane associated 2              |
|  | Q9Y263 | PLAA     | phospholipase A2 activating protein                                      |
|  | Q8IY17 | PNPLA6   | patatin like phospholipase domain containing 6                           |
|  | P20265 | POU3F2   | POU class 3 homeobox 2                                                   |
|  | Q96QC0 | PPP1R10  | protein phosphatase 1 regulatory subunit 10                              |
|  | Q96SB3 | PPP1R9B  | protein phosphatase 1 regulatory subunit 9B                              |
|  | Q9UPN7 | PPP6R1   | protein phosphatase 6 regulatory subunit 1                               |
|  | Q7Z3G6 | PRICKLE2 | prickle planar cell polarity protein 2                                   |
|  | Q13131 | PRKAA1   | protein kinase AMP-activated catalytic subunit alpha 1                   |
|  | Q9UGJ0 | PRKAG2   | protein kinase AMP-activated non-catalytic subunit gamma 2               |
|  | Q05513 | PRKCZ    | protein kinase C zeta                                                    |
|  | P04156 | PRNP     | prion protein                                                            |
|  | Q15185 | PTGES3   | prostaglandin E synthase 3                                               |
|  | Q96PU8 | QKI      | QKI, KH domain containing RNA binding                                    |
|  | P61106 | RAB14    | RAB14, member RAS oncogene family                                        |
|  | P0DI83 | RAB34    | RAB34, member RAS oncogene family                                        |
|  | Q15311 | RALBP1   | ralA binding protein 1                                                   |
|  | P46060 | RANGAP1  | Ran GTPase activating protein 1                                          |
|  | Q8NHQ8 | RASSF8   | Ras association domain family member 8                                   |
|  | Q9BX46 | RBM24    | RNA binding motif protein 24                                             |
|  | Q5TC82 | RC3H1    | ring finger and CCCH-type domains 1                                      |
|  | Q2KHR2 | RFX7     | regulatory factor X7                                                     |
|  | Q96B86 | RGMA     | repulsive guidance molecule BMP co-receptor a                            |
|  | Q6R327 | RICTOR   | RPTOR independent companion of MTOR complex 2                            |

|  |            |           |                                                        |
|--|------------|-----------|--------------------------------------------------------|
|  | Q9H871     | RMND5A    | required for meiotic nuclear division 5 homolog A      |
|  | Q5W0B1     | RNF219    | ring finger protein 219                                |
|  | Q9H0F5     | RNF38     | ring finger protein 38                                 |
|  | Q9Y6N7     | ROBO1     | roundabout guidance receptor 1                         |
|  | Q9HCK4     | ROBO2     | roundabout guidance receptor 2                         |
|  | Q13464     | ROCK1     | Rho associated coiled-coil containing protein kinase 1 |
|  | O75582     | RPS6KA5   | ribosomal protein S6 kinase A5                         |
|  | Q9NQC3     | RTN4      | reticulon 4                                            |
|  | Q13950     | RUNX2     | runt related transcription factor 2                    |
|  | P21453     | S1PR1     | sphingosine-1-phosphate receptor 1                     |
|  | Q86WG5     | SBF2      | SET binding factor 2                                   |
|  | Q15858     | SCN9A     | sodium voltage-gated channel alpha subunit 9           |
|  | Q93073     | SECISBP2L | SECIS binding protein 2 like                           |
|  | P58004     | SESN2     | sestrin 2                                              |
|  | P58005     | SESN3     | sestrin 3                                              |
|  | Q86VW0     | SESTD1    | SEC14 and spectrin domain containing 1                 |
|  | Q16585     | SGCB      | sarcoglycan beta                                       |
|  | P57059     | SIK1      | salt inducible kinase 1                                |
|  | A0A0B4J2F2 | SIK1B     | salt inducible kinase 1B (putative)                    |
|  | Q9NRC8     | SIRT7     | sirtuin 7                                              |
|  | Q9UIU6     | SIX4      | SIX homeobox 4                                         |
|  | Q1XH10     | SKIDA1    | SKI/DACH domain containing 1                           |
|  | O15403     | SLC16A6   | solute carrier family 16 member 6                      |
|  | Q9HC58     | SLC24A3   | solute carrier family 24 member 3                      |
|  | Q96H78     | SLC25A44  | solute carrier family 25 member 44                     |
|  | O43511     | SLC26A4   | solute carrier family 26 member 4                      |
|  | P11166     | SLC2A1    | solute carrier family 2 member 1                       |
|  | P52788     | SMS       | spermine synthase                                      |
|  | O60641     | SNAP91    | synaptosome associated protein 91                      |

|  |        |          |                                                                       |
|--|--------|----------|-----------------------------------------------------------------------|
|  | O75324 | SNN      | stannin                                                               |
|  | Q96L92 | SNX27    | sorting nexin family member 27                                        |
|  | Q07890 | SOS2     | SOS Ras/Rho guanine nucleotide exchange factor 2                      |
|  | Q68D10 | SPTY2D1  | SPT2 chromatin protein domain containing 1                            |
|  | Q05519 | SRSF11   | serine and arginine rich splicing factor 11                           |
|  | P43307 | SSR1     | signal sequence receptor subunit 1                                    |
|  | Q9Y3M8 | STARD13  | StAR related lipid transfer domain containing 13                      |
|  | Q9P2F5 | STOX2    | storkhead box 2                                                       |
|  | O43426 | SYNJ1    | synaptojanin 1                                                        |
|  | Q7Z422 | SZRD1    | SUZ RNA binding domain containing 1                                   |
|  | Q9C0D5 | TANC1    | tetratricopeptide repeat, ankyrin repeat and coiled-coil containing 1 |
|  | O95759 | TBC1D8   | TBC1 domain family member 8                                           |
|  | Q9BZK7 | TBL1XR1  | transducin beta like 1 X-linked receptor 1                            |
|  | Q02763 | TEK      | TEK receptor tyrosine kinase                                          |
|  | Q6PIY7 | TENT2    | terminal nucleotidyltransferase 2                                     |
|  | P02786 | TFRC     | transferrin receptor                                                  |
|  | P01135 | TGFA     | transforming growth factor alpha                                      |
|  | P61812 | TGFB2    | transforming growth factor beta 2                                     |
|  | Q9GZN2 | TGIF2    | TGFB induced factor homeobox 2                                        |
|  | O43493 | TGOLN2   | trans-golgi network protein 2                                         |
|  | Q9Y3B3 | TMED7    | transmembrane p24 trafficking protein 7                               |
|  | Q8WVE7 | TMEM170A | transmembrane protein 170A                                            |
|  | Q2M3C6 | TMEM266  | transmembrane protein 266                                             |
|  | Q969K7 | TMEM54   | transmembrane protein 54                                              |
|  | Q5T3F8 | TMEM63B  | transmembrane protein 63B                                             |
|  | Q9NQ34 | TMEM9B   | TMEM9 domain family member B                                          |
|  | Q8NDV7 | TNRC6A   | trinucleotide repeat containing 6A                                    |
|  | Q9HCJ0 | TNRC6C   | trinucleotide repeat containing 6C                                    |



|  |        |         |                                                                             |
|--|--------|---------|-----------------------------------------------------------------------------|
|  | O94826 | TOMM70  | translocase of outer mitochondrial membrane 70                              |
|  | O60296 | TRAK2   | trafficking kinesin protein 2                                               |
|  | Q8IWR1 | TRIM59  | tripartite motif containing 59                                              |
|  | Q9H3M7 | TXNIP   | thioredoxin interacting protein                                             |
|  | Q14157 | UBAP2L  | ubiquitin associated protein 2 like                                         |
|  | P61077 | UBE2D3  | ubiquitin conjugating enzyme E2 D3                                          |
|  | O95155 | UBE4B   | ubiquitination factor E4B                                                   |
|  | P55916 | UCP3    | uncoupling protein 3                                                        |
|  | Q8TAS1 | UHMK1   | U2AF homology motif kinase 1                                                |
|  | Q70CQ4 | USP31   | ubiquitin specific peptidase 31                                             |
|  | Q8NFA0 | USP32   | ubiquitin specific peptidase 32                                             |
|  | Q8TEY7 | USP33   | ubiquitin specific peptidase 33                                             |
|  | Q86UV5 | USP48   | ubiquitin specific peptidase 48                                             |
|  | Q96GC9 | VMP1    | vacuole membrane protein 1                                                  |
|  | Q8NEZ2 | VPS37A  | VPS37A, ESCRT-I subunit                                                     |
|  | Q86XK7 | VSIG1   | V-set and immunoglobulin domain containing 1                                |
|  | Q6ZS81 | WDFY4   | WDFY family member 4                                                        |
|  | Q8TBZ3 | WDR20   | WD repeat domain 20                                                         |
|  | O94967 | WDR47   | WD repeat domain 47                                                         |
|  | P04628 | WNT1    | Wnt family member 1                                                         |
|  | O00744 | WNT10B  | Wnt family member 10B                                                       |
|  | Q9C0E2 | XPO4    | exportin 4                                                                  |
|  | Q9H6S0 | YTHDC2  | YTH domain containing 2                                                     |
|  | P31946 | YWHAB   | tyrosine 3-monooxygenase/tryptophan 5-monooxygenase activation protein beta |
|  | Q99592 | ZBTB18  | zinc finger and BTB domain containing 18                                    |
|  | Q9C0B9 | ZCCHC2  | zinc finger CCHC-type containing 2                                          |
|  | Q8IUH5 | ZDHHC17 | zinc finger DHHC-type containing 17                                         |
|  | Q8IYP9 | ZDHHC23 | zinc finger DHHC-type containing 23                                         |

|            |                                       |        |          |                                                                                                                                                                                                                                                                                                                                                       |
|------------|---------------------------------------|--------|----------|-------------------------------------------------------------------------------------------------------------------------------------------------------------------------------------------------------------------------------------------------------------------------------------------------------------------------------------------------------|
| TargetScan |                                       | Q9NXF8 | ZDHHC7   | zinc finger DHHC-type containing 7                                                                                                                                                                                                                                                                                                                    |
|            |                                       | Q68DK2 | ZFYVE26  | zinc finger FYVE-type containing 26                                                                                                                                                                                                                                                                                                                   |
|            |                                       | Q7Z570 | ZNF804A  | zinc finger protein 804A                                                                                                                                                                                                                                                                                                                              |
|            |                                       | O75541 | ZNF821   | zinc finger protein 821                                                                                                                                                                                                                                                                                                                               |
|            |                                       | Q8ND25 | ZNRF1    | zinc and ring finger 1                                                                                                                                                                                                                                                                                                                                |
|            | miR-193-3p<br>Upregulated 24<br>hours | Q8IZ07 | ANKRD13A | Ankyrin repeat domain-containing protein 13A (Protein KE03)                                                                                                                                                                                                                                                                                           |
|            |                                       | Q96CW1 | AP2M1    | AP-2 complex subunit mu (AP-2 mu chain) (Adaptin-mu2) (Adaptor protein complex AP-2 subunit mu) (Adaptor-related protein complex 2 subunit mu) (Clathrin assembly protein complex 2 mu medium chain) (Clathrin coat assembly protein AP50) (Clathrin coat-associated protein AP50) (HA2 50 kDa subunit) (Plasma membrane adaptor AP-2 50 kDa protein) |
|            |                                       | Q14CB8 | ARHGAP19 | Rho GTPase-activating protein 19 (Rho-type GTPase-activating protein 19)                                                                                                                                                                                                                                                                              |
|            |                                       | Q9NZN5 | ARHGEF12 | Rho guanine nucleotide exchange factor 12 (Leukemia-associated RhoGEF)                                                                                                                                                                                                                                                                                |
|            |                                       | P0DP23 | CALM1    | Calmodulin-1                                                                                                                                                                                                                                                                                                                                          |
|            |                                       | O95931 | CBX7     | Chromobox protein homolog 7                                                                                                                                                                                                                                                                                                                           |
|            |                                       | P24385 | CCND1    | G1/S-specific cyclin-D1                                                                                                                                                                                                                                                                                                                               |
|            |                                       | O94985 | CLSTN1   | Calsyntenin-1                                                                                                                                                                                                                                                                                                                                         |
|            |                                       | P62633 | CNBP     | CCHC-type zinc finger nucleic acid binding protein                                                                                                                                                                                                                                                                                                    |
|            |                                       | Q9ULM6 | CNOT6    | CCR4-NOT transcription complex subunit 6                                                                                                                                                                                                                                                                                                              |
|            |                                       | Q05D32 | CTDSPL2  | CTD small phosphatase-like protein 2                                                                                                                                                                                                                                                                                                                  |
|            |                                       | Q15303 | ERBB4    | Receptor tyrosine-protein kinase erbB-4                                                                                                                                                                                                                                                                                                               |
|            |                                       | Q96KN4 | FAM84A   | Protein LRATD1                                                                                                                                                                                                                                                                                                                                        |
|            |                                       | Q9C0D6 | FHDC1    | FH2 domain-containing protein 1 (Inverted formin-1)                                                                                                                                                                                                                                                                                                   |
|            |                                       | Q01543 | FLI1     | Friend leukemia integration 1 transcription factor (Proto-oncogene Fli-1) (Transcription factor ERGB)                                                                                                                                                                                                                                                 |

|  |        |            |                                                                                                                                            |
|--|--------|------------|--------------------------------------------------------------------------------------------------------------------------------------------|
|  | P42694 | HELZ       | Probable helicase with zinc finger domain (EC 3.6.4.-) (Down-regulated in human cancers protein)                                           |
|  | P35453 | HOXD13     | Homeobox protein Hox-D13 (Homeobox protein Hox-4l)                                                                                         |
|  | Q8NFM7 | IL17RD     | Interleukin-17 receptor D (IL-17 receptor D) (IL-17RD) (IL17Rhom) (Interleukin-17 receptor-like protein) (Sef homolog) (hSef)              |
|  | Q8WYH8 | ING5       | Inhibitor of growth protein 5                                                                                                              |
|  | P63252 | KCNJ2      | Inward rectifier potassium channel 2                                                                                                       |
|  | P01116 | KRAS       | GTPase KRas                                                                                                                                |
|  | Q07820 | MCL1       | Induced myeloid leukemia cell differentiation protein Mcl-1 (Bcl-2-like protein 3) (Bcl2-L-3) (Bcl-2-related protein EAT/mcl1) (mcl1/EAT)  |
|  | P51513 | NOVA1      | RNA-binding protein Nova-1                                                                                                                 |
|  | P46459 | NSF        | Vesicle-fusing ATPase                                                                                                                      |
|  | O75914 | PAK3       | Serine/threonine-protein kinase PAK 3                                                                                                      |
|  | O96013 | PAK4       | Serine/threonine-protein kinase PAK 4 (EC 2.7.11.1) (p21-activated kinase 4) (PAK-4)                                                       |
|  | Q6DJT9 | PLAG1      | Zinc finger protein PLAG1                                                                                                                  |
|  | O60486 | PLXNC1     | Plexin-C1                                                                                                                                  |
|  | Q13362 | PPP2R5C    | Serine/threonine-protein phosphatase 2A 56 kDa regulatory subunit gamma isoform                                                            |
|  | Q06455 | RUNX1T1    | Protein CBFA2T1                                                                                                                            |
|  | Q3KNW5 | SLC10A6    | Solute carrier family 10 member 6                                                                                                          |
|  | Q9UGH3 | SLC23A2    | Solute carrier family 23 member 2                                                                                                          |
|  | Q01130 | SRSF2      | Serine/arginine-rich splicing factor 2                                                                                                     |
|  | Q9BVH7 | ST6GALNAC5 | Alpha-N-acetylgalactosaminide alpha-2,6-sialyltransferase                                                                                  |
|  | P15884 | TCF4       | Transcription factor 7-like 2 (HMG box transcription factor 4) (T-cell-specific transcription factor 4) (T-cell factor 4) (TCF-4) (hTCF-4) |

|       |  |        |          |                                                                         |
|-------|--|--------|----------|-------------------------------------------------------------------------|
| miRDB |  | Q9NZI7 | UBP1     | Upstream-binding protein 1 (Transcription factor LBP-1)                 |
|       |  | Q6UXN9 | WDR82    | WD repeat-containing protein 82 (Protein TMEM113) (Swd2)                |
|       |  | Q2M2I8 | AAK1     | AP2 associated kinase 1                                                 |
|       |  | Q9NUT2 | ABCB8    | ATP binding cassette subfamily B member 8                               |
|       |  | Q9NYB9 | ABI2     | abl interactor 2                                                        |
|       |  | P78563 | ADARB1   | adenosine deaminase, RNA specific B1                                    |
|       |  | P48960 | ADGRE5   | adhesion G protein-coupled receptor E5                                  |
|       |  | Q13155 | AIMP2    | aminoacyl tRNA synthetase complex interacting multifunctional protein 2 |
|       |  | Q96IF1 | AJUBA    | ajuba LIM protein                                                       |
|       |  | Q96CW1 | AP2M1    | adaptor related protein complex 2 subunit mu 1                          |
|       |  | O15033 | AREL1    | apoptosis resistant E3 ubiquitin protein ligase 1                       |
|       |  | Q9NZN5 | ARHGEF12 | Rho guanine nucleotide exchange factor 12                               |
|       |  | Q5U623 | ATF7IP2  | activating transcription factor 7 interacting protein 2                 |
|       |  | Q9BY67 | CADM1    | cell adhesion molecule 1                                                |
|       |  | Q8N187 | CARF     | calcium responsive transcription factor                                 |
|       |  | O95931 | CBX7     | chromobox 7                                                             |
|       |  | Q8IWP9 | CCDC28A  | coiled-coil domain containing 28A                                       |
|       |  | P24385 | CCND1    | cyclin D1                                                               |
|       |  | O15516 | CLOCK    | clock circadian regulator                                               |
|       |  | Q00610 | CLTC     | clathrin heavy chain                                                    |
|       |  | Q9ULM6 | CNOT6    | CCR4-NOT transcription complex subunit 6                                |
|       |  | Q8IUR6 | CREBRF   | CREB3 regulatory factor                                                 |
|       |  | Q9BWK5 | CYREN    | cell cycle regulator of NHEJ                                            |
|       |  | P61962 | DCAF7    | DDB1 and CUL4 associated factor 7                                       |
|       |  | Q8TDJ6 | DMXL2    | Dmx like 2                                                              |
|       |  | Q8WXU2 | DNAAF4   | dynein axonemal assembly factor 4                                       |
|       |  | Q5JPH6 | EARS2    | glutamyl-tRNA synthetase 2, mitochondrial                               |
|       |  | P54756 | EPHA5    | EPH receptor A5                                                         |

|        |          |                                                         |
|--------|----------|---------------------------------------------------------|
| Q15303 | ERBB4    | erb-b2 receptor tyrosine kinase 4                       |
| P14921 | ETS1     | ETS proto-oncogene 1, transcription factor              |
| P50549 | ETV1     | ETS variant 1                                           |
| Q6V0I7 | FAT4     | FAT atypical cadherin 4                                 |
| Q9C0D6 | FHDC1    | FH2 domain containing 1                                 |
| Q01543 | FLI1     | Fli-1 proto-oncogene, ETS transcription factor          |
| Q99678 | GPR20    | G protein-coupled receptor 20                           |
| Q9ULI3 | HEG1     | heart development protein with EGF like domains 1       |
| Q1KMD3 | HNRNPUL2 | heterogeneous nuclear ribonucleoprotein U like 2        |
| P35453 | HOXD13   | homeobox D13                                            |
| P24593 | IGFBP5   | insulin like growth factor binding protein 5            |
| Q8NFM7 | IL17RD   | interleukin 17 receptor D                               |
| Q53TQ3 | INO80D   | INO80 complex subunit D                                 |
| P63252 | KCNJ2    | potassium voltage-gated channel subfamily J member 2    |
| P10721 | KIT      | KIT proto-oncogene receptor tyrosine kinase             |
| P01116 | KRAS     | KRAS proto-oncogene, GTPase                             |
| P11047 | LAMC1    | laminin subunit gamma 1                                 |
| Q13753 | LAMC2    | laminin subunit gamma 2                                 |
| O75096 | LRP4     | LDL receptor related protein 4                          |
| Q9NU23 | LYRM2    | LYR motif containing 2                                  |
| P53779 | MAPK10   | mitogen-activated protein kinase 10                     |
| Q9Y4F3 | MARF1    | meiosis regulator and mRNA stability factor 1           |
| Q6P1R3 | MSANTD2  | Myb/SANT DNA binding domain containing 2                |
| Q8IVL0 | NAV3     | neuron navigator 3                                      |
| P35240 | NF2      | neurofibromin 2                                         |
| P21589 | NT5E     | 5'-nucleotidase ecto                                    |
| Q99650 | OSMR     | oncostatin M receptor                                   |
| Q93086 | P2RX5    | purinergic receptor P2X 5                               |
| P37287 | PIGA     | phosphatidylinositol glycan anchor biosynthesis class A |

|        |            |                                                                             |
|--------|------------|-----------------------------------------------------------------------------|
| Q6DJT9 | PLAG1      | PLAG1 zinc finger                                                           |
| P00749 | PLAU       | plasminogen activator, urokinase                                            |
| Q4KWH8 | PLCH1      | phospholipase C eta 1                                                       |
| O60486 | PLXNC1     | plexin C1                                                                   |
| Q8TEU7 | RAPGEF6    | Rap guanine nucleotide exchange factor 6                                    |
| Q96E39 | RBMXL1     | RBMX like 1                                                                 |
| Q96B86 | RGMA       | repulsive guidance molecule BMP co-receptor a                               |
| P62070 | RRAS2      | RAS related 2                                                               |
| Q06455 | RUNX1T1    | RUNX1 translocation partner 1                                               |
| Q8IUQ4 | SIAH1      | siah E3 ubiquitin protein ligase 1                                          |
| Q3KNW5 | SLC10A6    | solute carrier family 10 member 6                                           |
| O15403 | SLC16A6    | solute carrier family 16 member 6                                           |
| Q07890 | SOS2       | SOS Ras/Rho guanine nucleotide exchange factor 2                            |
| Q01130 | SRSF2      | serine and arginine rich splicing factor 2                                  |
| Q9BVH7 | ST6GALNAC5 | ST6 N-acetylgalactosaminide alpha-2,6-sialyltransferase 5                   |
| Q7L7X3 | TAOK1      | TAO kinase 1                                                                |
| Q6NXT6 | TAPT1      | transmembrane anterior posterior transformation 1                           |
| Q03167 | TGFBR3     | transforming growth factor beta receptor 3                                  |
| Q9Y5J9 | TIMM8B     | translocase of inner mitochondrial membrane 8 homolog B                     |
| Q92574 | TSC1       | TSC complex subunit 1                                                       |
| Q9NZI7 | UBP1       | upstream binding protein 1                                                  |
| Q96BW1 | UPRT       | uracil phosphoribosyltransferase homolog                                    |
| Q70EK8 | USP53      | ubiquitin specific peptidase 53                                             |
| Q9GZP7 | VN1R1      | vomer nasal 1 receptor 1                                                    |
| Q6UXN9 | WDR82      | WD repeat domain 82                                                         |
| P63104 | YWHAZ      | tyrosine 3-monooxygenase/tryptophan 5-monooxygenase activation protein zeta |
| P24278 | ZBTB25     | zinc finger and BTB domain containing 25                                    |
| Q9HA38 | ZMAT3      | zinc finger matrin-type 3                                                   |

|            |                                         |        |          |                                                                                                                                    |
|------------|-----------------------------------------|--------|----------|------------------------------------------------------------------------------------------------------------------------------------|
|            |                                         | Q5T7W0 | ZNF618   | zinc finger protein 618                                                                                                            |
| TargetScan | miR-194-5p<br>Downregulated 24<br>hours | Q9Y281 | CFL2     | Centromere protein L (CENP-L) (Interphase centromere complex protein 33)                                                           |
|            |                                         | Q8TD26 | CHD6     | Chromodomain-helicase-DNA-binding protein 6 (CHD-6) (EC 3.6.4.12) (ATP-dependent helicase CHD6) (Radiation-induced gene B protein) |
|            |                                         | Q52LR7 | EPC2     | Enhancer of polycomb homolog 2                                                                                                     |
|            |                                         | Q53TX7 | FLJ20373 | Uncharacterized protein FLJ20373                                                                                                   |
|            |                                         | Q8NBR6 | MINDY2   | Ubiquitin carboxyl-terminal hydrolase MINDY-2 (EC 3.4.19.12) (Deubiquitinating enzyme MINDY-2) (Protein FAM63B)                    |
|            |                                         | Q9Y266 | NUDC     | Nuclear migration protein nudC (Nuclear distribution protein C homolog)                                                            |
|            |                                         | Q9ULI1 | NWD2     | NACHT and WD repeat domain-containing protein 2 (Leucine-rich repeat and WD repeat-containing protein KIAA1239)                    |
|            |                                         | Q9BPZ3 | PAIP2    | Polyadenylate-binding protein-interacting protein 2                                                                                |
|            |                                         | P10644 | PRKAR1A  | cAMP-dependent protein kinase type II-alpha regulatory subunit                                                                     |
|            |                                         | Q15382 | RHEB     | GTP-binding protein Rheb                                                                                                           |
|            |                                         | P61956 | SUMO2    | SUZ domain-containing protein 1 (Putative MAPK-activating protein PM18/PM20/PM22)                                                  |
| miRDB      |                                         | Q9NRK6 | ABCB10   | ATP binding cassette subfamily B member 10                                                                                         |
|            |                                         | Q9H3P7 | ACBD3    | acyl-CoA binding domain containing 3                                                                                               |
|            |                                         | P22303 | ACHE     | acetylcholinesterase (Cartwright blood group)                                                                                      |
|            |                                         | Q13705 | ACVR2B   | activin A receptor type 2B                                                                                                         |
|            |                                         | O95841 | ANGPTL1  | angiopoietin like 1                                                                                                                |
|            |                                         | Q5T5U3 | ARHGAP21 | Rho GTPase activating protein 21                                                                                                   |
|            |                                         | Q68CP9 | ARID2    | AT-rich interaction domain 2                                                                                                       |
|            |                                         | P98194 | ATP2C1   | ATPase secretory pathway Ca2+ transporting 1                                                                                       |
|            |                                         | Q9UI12 | ATP6V1H  | ATPase H+ transporting V1 subunit H                                                                                                |

|  |        |          |                                                              |
|--|--------|----------|--------------------------------------------------------------|
|  | P12694 | BCKDHA   | branched chain keto acid dehydrogenase E1, alpha polypeptide |
|  | Q8TD16 | BICD2    | BICD cargo adaptor 2                                         |
|  | Q12982 | BNIP2    | BCL2 interacting protein 2                                   |
|  | Q5PSV4 | BRMS1L   | BRMS1 like transcriptional repressor                         |
|  | Q9P203 | BTBD7    | BTB domain containing 7                                      |
|  | Q96B23 | C18orf25 | chromosome 18 open reading frame 25                          |
|  | Q8TCD1 | C18orf32 | chromosome 18 open reading frame 32                          |
|  | Q9NYK6 | C21orf91 | chromosome 21 open reading frame 91                          |
|  | Q6ZTY9 | C7orf65  | chromosome 7 open reading frame 65                           |
|  | Q9BY67 | CADM1    | cell adhesion molecule 1                                     |
|  | Q9BXY5 | CAPS2    | calcyphosine 2                                               |
|  | O14936 | CASK     | calcium/calmodulin dependent serine protein kinase           |
|  | O94921 | CDK14    | cyclin dependent kinase 14                                   |
|  | Q5SW79 | CEP170   | centrosomal protein 170                                      |
|  | O14646 | CHD1     | chromodomain helicase DNA binding protein 1                  |
|  | Q14839 | CHD4     | chromodomain helicase DNA binding protein 4                  |
|  | Q8TD26 | CHD6     | chromodomain helicase DNA binding protein 6                  |
|  | Q9UHD1 | CHORDC1  | cysteine and histidine rich domain containing 1              |
|  | Q9C0C6 | CIPC     | CLOCK interacting pacemaker                                  |
|  | P51795 | CLCN5    | chloride voltage-gated channel 5                             |
|  | Q6UVW9 | CLEC2A   | C-type lectin domain family 2 member A                       |
|  | Q3B7I2 | CNPY1    | canopy FGF signaling regulator 1                             |
|  | P21554 | CNR1     | cannabinoid receptor 1                                       |
|  | A4D0V7 | CPED1    | cadherin like and PC-esterase domain containing 1            |
|  | Q05D32 | CTDSPL2  | CTD small phosphatase like 2                                 |
|  | Q13620 | CUL4B    | cullin 4B                                                    |
|  | P19876 | CXCL3    | C-X-C motif chemokine ligand 3                               |
|  | Q9UI36 | DACH1    | dachshund family transcription factor 1                      |
|  | Q9NRI5 | DISC1    | DISC1 scaffold protein                                       |



|  |        |          |                                                               |
|--|--------|----------|---------------------------------------------------------------|
|  | Q8NF50 | DOCK8    | dedicator of cytokinesis 8                                    |
|  | Q6XUX3 | DSTYK    | dual serine/threonine and tyrosine protein kinase             |
|  | Q13627 | DYRK1A   | dual specificity tyrosine phosphorylation regulated kinase 1A |
|  | Q6PJG2 | ELMSAN1  | ELM2 and Myb/SANT domain containing 1                         |
|  | Q9ULC0 | EMCN     | endomucin                                                     |
|  | Q52LR7 | EPC2     | enhancer of polycomb homolog 2                                |
|  | P54756 | EPHA5    | EPH receptor A5                                               |
|  | P11308 | ERG      | ETS transcription factor ERG                                  |
|  | Q96RQ1 | ERGIC2   | ERGIC and golgi 2                                             |
|  | Q86UK5 | EVC2     | EvC ciliary complex subunit 2                                 |
|  | Q9Y6X4 | FAM169A  | family with sequence similarity 169 member A                  |
|  | Q969H0 | FBXW7    | F-box and WD repeat domain containing 7                       |
|  | P02671 | FGA      | fibrinogen alpha chain                                        |
|  | Q01543 | FLI1     | Fli-1 proto-oncogene, ETS transcription factor                |
|  | O00358 | FOXE1    | forkhead box E1                                               |
|  | O60353 | FZD6     | frizzled class receptor 6                                     |
|  | Q5T7V8 | GORAB    | golgin, RAB6 interacting                                      |
|  | P00505 | GOT2     | glutamic-oxaloacetic transaminase 2                           |
|  | Q9NW75 | GPATCH2  | G-patch domain containing 2                                   |
|  | Q9NWQ4 | GPATCH2L | G-patch domain containing 2 like                              |
|  | Q6ISB3 | GRHL2    | grainyhead like transcription factor 2                        |
|  | P46976 | GYG1     | glycogenin 1                                                  |
|  | Q99075 | HBEGF    | heparin binding EGF like growth factor                        |
|  | Q5U5R9 | HECTD2   | HECT domain E3 ubiquitin protein ligase 2                     |
|  | Q9UM44 | HHLA2    | HERV-H LTR-associating 2                                      |
|  | P35680 | HNF1B    | HNF1 homeobox B                                               |
|  | Q86VS8 | HOOK3    | hook microtubule tethering protein 3                          |
|  | O95757 | HSPA4L   | heat shock protein family A (Hsp70) member 4 like             |
|  | P08069 | IGF1R    | insulin like growth factor 1 receptor                         |

|  |        |          |                                                                    |
|--|--------|----------|--------------------------------------------------------------------|
|  | Q5DX21 | IGSF11   | immunoglobulin superfamily member 11                               |
|  | P27987 | ITPKB    | inositol-trisphosphate 3-kinase B                                  |
|  | Q15811 | ITSN1    | intersectin 1                                                      |
|  | Q9Y6Y0 | IVNS1ABP | influenza virus NS1A binding protein                               |
|  | Q6IE81 | JADE1    | jade family PHD finger 1                                           |
|  | Q8N5Z5 | KCTD17   | potassium channel tetramerization domain containing 17             |
|  | P29375 | KDM5A    | lysine demethylase 5A                                              |
|  | Q5VWX1 | KHDRBS2  | KH RNA binding domain containing, signal transduction associated 2 |
|  | Q9ULL0 | KIAA1210 | KIAA1210                                                           |
|  | Q9Y4X4 | KLF12    | Kruppel like factor 12                                             |
|  | Q8NEZ4 | KMT2C    | lysine methyltransferase 2C                                        |
|  | Q9NQR1 | KMT5A    | lysine methyltransferase 5A                                        |
|  | Q7Z3Z0 | KRT25    | keratin 25                                                         |
|  | P13473 | LAMP2    | lysosomal associated membrane protein 2                            |
|  | Q96JN0 | LCOR     | ligand dependent nuclear receptor corepressor                      |
|  | Q52LA3 | LIN52    | lin-52 DREAM MuvB core complex component                           |
|  | Q9NUP9 | LIN7C    | lin-7 homolog C, crumbs cell polarity complex component            |
|  | Q7L985 | LINGO2   | leucine rich repeat and Ig domain containing 2                     |
|  | O60711 | LPXN     | leupaxin                                                           |
|  | Q5VUJ6 | LRCH2    | leucine rich repeats and calponin homology domain containing 2     |
|  | Q32MZ4 | LRRFIP1  | LRR binding FLII interacting protein 1                             |
|  | Q13449 | LSAMP    | limbic system associated membrane protein                          |
|  | O95232 | LUC7L3   | LUC7 like 3 pre-mRNA splicing factor                               |
|  | Q8IV03 | LURAP1L  | leucine rich adaptor protein 1 like                                |
|  | P07948 | LYN      | LYN proto-oncogene, Src family tyrosine kinase                     |
|  | P11137 | MAP2     | microtubule associated protein 2                                   |
|  | Q16819 | MEP1A    | meprin A subunit alpha                                             |

|        |           |                                                                          |
|--------|-----------|--------------------------------------------------------------------------|
| P50579 | METAP2    | methionyl aminopeptidase 2                                               |
| Q9UM21 | MGAT4A    | alpha-1,3-mannosyl-glycoprotein 4-beta-N-acetylglucosaminyltransferase A |
| Q9NPA3 | MID1IP1   | MID1 interacting protein 1                                               |
| Q8NBR6 | MINDY2    | MINDY lysine 48 deubiquitinase 2                                         |
| Q9HD23 | MRS2      | magnesium transporter MRS2                                               |
| Q9Y217 | MTMR6     | myotubularin related protein 6                                           |
| O43312 | MTSS1     | MTSS1, I-BAR domain containing                                           |
| Q9GZZ1 | NAA50     | N(alpha)-acetyltransferase 50, NatE catalytic subunit                    |
| Q13765 | NACA      | nascent polypeptide associated complex subunit alpha                     |
| O14524 | NEMP1     | nuclear envelope integral membrane protein 1                             |
| O94916 | NFAT5     | nuclear factor of activated T cells 5                                    |
| Q9BS92 | NIPSNAP3B | nipsnap homolog 3B                                                       |
| P08949 | NMB       | neuromedin B                                                             |
| Q9NPD7 | NRN1      | neuritin 1                                                               |
| Q9Y2I2 | NTNG1     | netrin G1                                                                |
| Q9Y266 | NUDC      | nuclear distribution C, dynein complex regulator                         |
| Q9BZD4 | NUF2      | NDC80 kinetochore complex component NUF2                                 |
| Q9ULI1 | NWD2      | NACHT and WD repeat domain containing 2                                  |
| O95948 | ONECUT2   | one cut homeobox 2                                                       |
| Q9H255 | OR51E2    | olfactory receptor family 51 subfamily E member 2                        |
| Q9BXB4 | OSBPL11   | oxysterol binding protein like 11                                        |
| Q9BZF1 | OSBPL8    | oxysterol binding protein like 8                                         |
| Q86WC4 | OSTM1     | osteoclastogenesis associated transmembrane protein 1                    |
| Q96BN8 | OTULIN    | OTU deubiquitinase with linear linkage specificity                       |
| Q9BPZ3 | PAIP2     | poly(A) binding protein interacting protein 2                            |
| Q9NVD7 | PARVA     | parvin alpha                                                             |
| P11177 | PDHB      | pyruvate dehydrogenase E1 beta subunit                                   |
| Q15120 | PDK3      | pyruvate dehydrogenase kinase 3                                          |

|        |          |                                                             |
|--------|----------|-------------------------------------------------------------|
| Q9BRX2 | PELO     | pelota mRNA surveillance and ribosome rescue factor         |
| Q8WV24 | PHLDA1   | pleckstrin homology like domain family A member 1           |
| O60346 | PHLPP1   | PH domain and leucine rich repeat protein phosphatase 1     |
| Q9BZ72 | PITPNM2  | phosphatidylinositol transfer protein membrane associated 2 |
| O43164 | PJA2     | praja ring finger ubiquitin ligase 2                        |
| Q86W92 | PPFIBP1  | PPFIA binding protein 1                                     |
| Q08209 | PPP3CA   | protein phosphatase 3 catalytic subunit alpha               |
| Q8NI37 | PPTC7    | PTC7 protein phosphatase homolog                            |
| Q7Z3G6 | PRICKLE2 | prickle planar cell polarity protein 2                      |
| Q05209 | PTPN12   | protein tyrosine phosphatase, non-receptor type 12          |
| P17706 | PTPN2    | protein tyrosine phosphatase, non-receptor type 2           |
| Q4JDL3 | PTPN20   | protein tyrosine phosphatase, non-receptor type 20          |
| Q96PU8 | QKI      | QKI, KH domain containing RNA binding                       |
| Q9BZG1 | RAB38    | RAB38, member RAS oncogene family                           |
| P57729 | RAB3B    | RAB3B, member RAS oncogene family                           |
| Q7Z5J4 | RAI1     | retinoic acid induced 1                                     |
| P61224 | RAP1B    | RAP1B, member of RAS oncogene family                        |
| O60673 | REV3L    | REV3 like, DNA directed polymerase zeta catalytic subunit   |
| Q15382 | RHEB     | Ras homolog, mTORC1 binding                                 |
| Q96EQ8 | RNF125   | ring finger protein 125                                     |
| Q8TC41 | RNF217   | ring finger protein 217                                     |
| O60942 | RNGTT    | RNA guanylyltransferase and 5'-phosphatase                  |
| Q6PCB5 | RSBN1L   | round spermatid basic protein 1 like                        |
| Q96T23 | RSF1     | remodeling and spacing factor 1                             |
| Q8WXA3 | RUFY2    | RUN and FYVE domain containing 2                            |
| P19793 | RXRA     | retinoid X receptor alpha                                   |
| Q9NSC2 | SALL1    | spalt like transcription factor 1                           |
| Q9UPU9 | SAMD4A   | sterile alpha motif domain containing 4A                    |
| Q01826 | SATB1    | SATB homeobox 1                                             |

|  |        |          |                                               |
|--|--------|----------|-----------------------------------------------|
|  | P31431 | SDC4     | syndecan 4                                    |
|  | O95487 | SEC24B   | SEC24 homolog B, COPII coat complex component |
|  | P49903 | SEPHS1   | selenophosphate synthetase 1                  |
|  | Q9C0A6 | SETD5    | SET domain containing 5                       |
|  | Q96HF1 | SFRP2    | secreted frizzled related protein 2           |
|  | Q9BWM7 | SFXN3    | sideroflexin 3                                |
|  | O43556 | SGCE     | sarcoglycan epsilon                           |
|  | Q0GE19 | SLC10A7  | solute carrier family 10 member 7             |
|  | P55011 | SLC12A2  | solute carrier family 12 member 2             |
|  | Q9UHW9 | SLC12A6  | solute carrier family 12 member 6             |
|  | P43003 | SLC1A3   | solute carrier family 1 member 3              |
|  | O95847 | SLC25A27 | solute carrier family 25 member 27            |
|  | O00337 | SLC28A1  | solute carrier family 28 member 1             |
|  | Q9Y6M5 | SLC30A1  | solute carrier family 30 member 1             |
|  | Q01650 | SLC7A5   | solute carrier family 7 member 5              |
|  | Q9H2G2 | SLK      | STE20 like kinase                             |
|  | H3BMG3 | SMKR1    | small lysine rich protein 1                   |
|  | O60641 | SNAP91   | synaptosome associated protein 91             |
|  | P35711 | SOX5     | SRY-box 5                                     |
|  | Q7Z699 | SPRED1   | sprouty related EVH1 domain containing 1      |
|  | Q68D10 | SPTY2D1  | SPT2 chromatin protein domain containing 1    |
|  | Q76I76 | SSH2     | slingshot protein phosphatase 2               |
|  | Q9NUL3 | STAU2    | staufen double-stranded RNA binding protein 2 |
|  | Q8NFT2 | STEAP2   | STEAP2 metalloredutase                        |
|  | Q9UMX1 | SUFU     | SUFU negative regulator of hedgehog signaling |
|  | P61956 | SUMO2    | small ubiquitin-like modifier 2               |
|  | O00268 | TAF4     | TATA-box binding protein associated factor 4  |
|  | Q7L7X3 | TAOK1    | TAO kinase 1                                  |
|  | Q3YBR2 | TBRG1    | transforming growth factor beta regulator 1   |

|            |                                       |        |         |                                                                                                |
|------------|---------------------------------------|--------|---------|------------------------------------------------------------------------------------------------|
|            |                                       | Q96EI5 | TCEAL4  | transcription elongation factor A like 4                                                       |
|            |                                       | Q96IP4 | TENT5A  | terminal nucleotidyltransferase 5A                                                             |
|            |                                       | Q9HC24 | TMBIM4  | transmembrane BAX inhibitor motif containing 4                                                 |
|            |                                       | Q9Y3A6 | TMED5   | transmembrane p24 trafficking protein 5                                                        |
|            |                                       | Q6UXF1 | TMEM108 | transmembrane protein 108                                                                      |
|            |                                       | P36406 | TRIM23  | tripartite motif containing 23                                                                 |
|            |                                       | O60635 | TSPAN1  | tetraspanin 1                                                                                  |
|            |                                       | P41732 | TSPAN7  | tetraspanin 7                                                                                  |
|            |                                       | Q86TV6 | TTC7B   | tetratricopeptide repeat domain 7B                                                             |
|            |                                       | O15042 | U2SURP  | U2 snRNP associated SURP domain containing                                                     |
|            |                                       | Q9H0E7 | USP44   | ubiquitin specific peptidase 44                                                                |
|            |                                       | Q92738 | USP6NL  | USP6 N-terminal like                                                                           |
|            |                                       | Q7Z5K2 | WAPL    | WAPL cohesin release factor                                                                    |
|            |                                       | Q9Y2I8 | WDR37   | WD repeat domain 37                                                                            |
|            |                                       | Q9H0M0 | WWP1    | WW domain containing E3 ubiquitin protein ligase 1                                             |
|            |                                       | Q9NQH7 | XPNPEP3 | X-prolyl aminopeptidase 3                                                                      |
|            |                                       | P46937 | YAP1    | Yes associated protein 1                                                                       |
|            |                                       | Q9BYJ9 | YTHDF1  | YTH N6-methyladenosine RNA binding protein 1                                                   |
|            |                                       | O76080 | ZFAND5  | zinc finger AN1-type containing 5                                                              |
|            |                                       | Q15911 | ZFHX3   | zinc finger homeobox 3                                                                         |
|            |                                       | Q86UP3 | ZFHX4   | zinc finger homeobox 4                                                                         |
|            |                                       | Q92618 | ZNF516  | zinc finger protein 516                                                                        |
|            |                                       | Q9HCE3 | ZNF532  | zinc finger protein 532                                                                        |
|            |                                       | Q8N8J6 | ZNF615  | zinc finger protein 615                                                                        |
|            |                                       | Q9NQZ8 | ZNF71   | zinc finger protein 71                                                                         |
| TargetScan | miR-200c-3p<br>Upregulated 6<br>hours | Q9BUR5 | APOO    | MICOS complex subunit MIC26 (Apolipoprotein O) (MICOS complex subunit MIC23) (Protein FAM121B) |
|            |                                       | Q86WC4 | OSTM1   | Osteopetrosis-associated transmembrane protein 1 (Chloride channel 7 beta subunit)             |

|       |  |                |          |                                                                                                                                           |
|-------|--|----------------|----------|-------------------------------------------------------------------------------------------------------------------------------------------|
| miRDB |  | Q9BPZ3         | PAIP2    | Polyadenylate-binding protein-interacting protein 2 (PABP-interacting protein 2) (PAIP-2) (Poly(A)-binding protein-interacting protein 2) |
|       |  | Q9NQ94         | A1CF     | APOBEC1 complementation factor                                                                                                            |
|       |  | Q8NER5         | ACVR1C   | activin A receptor type 1C                                                                                                                |
|       |  | O15072         | ADAMTS3  | ADAM metalloproteinase with thrombospondin type 1 motif 3                                                                                 |
|       |  | P00325         | ADH1B    | alcohol dehydrogenase 1B (class I), beta polypeptide                                                                                      |
|       |  | Q86V24         | ADIPOR2  | adiponectin receptor 2                                                                                                                    |
|       |  | P51826         | AFF3     | AF4/FMR2 family member 3                                                                                                                  |
|       |  | P52594         | AGFG1    | ArfGAP with FG repeats 1                                                                                                                  |
|       |  | O43687, Q9P0M2 | AKAP7    | A-kinase anchoring protein 7                                                                                                              |
|       |  | P00352         | ALDH1A1  | aldehyde dehydrogenase 1 family member A1                                                                                                 |
|       |  | Q9UKV5         | AMFR     | autocrine motility factor receptor                                                                                                        |
|       |  | Q12955         | ANK3     | ankyrin 3                                                                                                                                 |
|       |  | Q6AI12         | ANKRD40  | ankyrin repeat domain 40                                                                                                                  |
|       |  | Q8N8A2         | ANKRD44  | ankyrin repeat domain 44                                                                                                                  |
|       |  | P56377         | AP1S2    | adaptor related protein complex 1 subunit sigma 2                                                                                         |
|       |  | Q9BUR5         | APOO     | apolipoprotein O                                                                                                                          |
|       |  | Q9P2F6         | ARHGAP20 | Rho GTPase activating protein 20                                                                                                          |
|       |  | O43182         | ARHGAP6  | Rho GTPase activating protein 6                                                                                                           |
|       |  | Q4LE39         | ARID4B   | AT-rich interaction domain 4B                                                                                                             |
|       |  | Q9Y4X5         | ARIH1    | ariadne RBR E3 ubiquitin protein ligase 1                                                                                                 |
|       |  | Q9Y2Y0         | ARL2BP   | ADP ribosylation factor like GTPase 2 binding protein                                                                                     |
|       |  | Q9Y689         | ARL5A    | ADP ribosylation factor like GTPase 5A                                                                                                    |
|       |  | Q13510         | ASAP1    | ArfGAP with SH3 domain, ankyrin repeat and PH domain 1                                                                                    |
|       |  | Q9ULI0         | ATAD2B   | ATPase family, AAA domain containing 2B                                                                                                   |
|       |  | Q8NHH9         | ATL2     | atlastin GTPase 2                                                                                                                         |
|       |  | Q8NB49         | ATP11C   | ATPase phospholipid transporting 11C                                                                                                      |
|       |  | P06576         | ATP5F1B  | ATP synthase F1 subunit beta                                                                                                              |

|  |        |          |                                                                                      |
|--|--------|----------|--------------------------------------------------------------------------------------|
|  | Q9Y487 | ATP6V0A2 | ATPase H <sup>+</sup> transporting V0 subunit a2                                     |
|  | P54253 | ATXN1    | ataxin 1                                                                             |
|  | Q6Y288 | B3GLCT   | beta 3-glucosyltransferase                                                           |
|  | Q9NY97 | B3GNT2   | UDP-GlcNAc:betaGal beta-1,3-N-acetylglucosaminyltransferase 2                        |
|  | O43505 | B4GAT1   | beta-1,4-glucuronyltransferase 1                                                     |
|  | Q92560 | BAP1     | BRCA1 associated protein 1                                                           |
|  | Q9C0K0 | BCL11B   | BCL11B, BAF complex component                                                        |
|  | A6H8Y1 | BDP1     | B double prime 1, subunit of RNA polymerase III transcription initiation factor IIIB |
|  | Q9H694 | BICC1    | BicC family RNA binding protein 1                                                    |
|  | P62952 | BLCAP    | BLCAP, apoptosis inducing factor                                                     |
|  | Q6ZN30 | BNC2     | basenuclin 2                                                                         |
|  | Q6RI45 | BRWD3    | bromodomain and WD repeat domain containing 3                                        |
|  | Q6NUJ2 | C11orf87 | chromosome 11 open reading frame 87                                                  |
|  | C9JLR9 | C11orf95 | chromosome 11 open reading frame 95                                                  |
|  | Q14CZ0 | C16orf72 | chromosome 16 open reading frame 72                                                  |
|  | Q9Y376 | CAB39    | calcium binding protein 39                                                           |
|  | Q08AD1 | CAMSAP2  | calmodulin regulated spectrin associated protein family member 2                     |
|  | P41180 | CASR     | calcium sensing receptor                                                             |
|  | Q86V15 | CASZ1    | castor zinc finger 1                                                                 |
|  | P22681 | CBL      | Cbl proto-oncogene                                                                   |
|  | O00257 | CBX4     | chromobox 4                                                                          |
|  | Q9NQR7 | CCDC177  | coiled-coil domain containing 177                                                    |
|  | Q8N4S0 | CCDC82   | coiled-coil domain containing 82                                                     |
|  | O96020 | CCNE2    | cyclin E2                                                                            |
|  | Q5T5M9 | CCNJ     | cyclin J                                                                             |
|  | Q8N7R7 | CCNYL1   | cyclin Y like 1                                                                      |



|  |        |          |                                                         |
|--|--------|----------|---------------------------------------------------------|
|  | P55287 | CDH11    | cadherin 11                                             |
|  | Q9HBT6 | CDH20    | cadherin 20                                             |
|  | Q00537 | CDK17    | cyclin dependent kinase 17                              |
|  | Q9Y232 | CDYL     | chromodomain Y like                                     |
|  | Q8N8U2 | CDYL2    | chromodomain Y like 2                                   |
|  | Q9BXF3 | CECR2    | CECR2, histone acetyl-lysine reader                     |
|  | Q5VT06 | CEP350   | centrosomal protein 350                                 |
|  | Q9BYV8 | CEP41    | centrosomal protein 41                                  |
|  | Q5SZL2 | CEP85L   | centrosomal protein 85 like                             |
|  | Q8IW35 | CEP97    | centrosomal protein 97                                  |
|  | Q9Y281 | CFL2     | cofilin 2                                               |
|  | Q9NZZ3 | CHMP5    | charged multivesicular body protein 5                   |
|  | P52757 | CHN2     | chimerin 2                                              |
|  | Q9BU40 | CHRD1    | chordin like 1                                          |
|  | P08172 | CHRM2    | cholinergic receptor muscarinic 2                       |
|  | Q15825 | CHRNA6   | cholinergic receptor nicotinic alpha 6 subunit          |
|  | Q86X52 | CHSY1    | chondroitin sulfate synthase 1                          |
|  | Q07065 | CKAP4    | cytoskeleton associated protein 4                       |
|  | Q7Z460 | CLASP1   | cytoplasmic linker associated protein 1                 |
|  | O75122 | CLASP2   | cytoplasmic linker associated protein 2                 |
|  | Q9Y696 | CLIC4    | chloride intracellular channel 4                        |
|  | P30622 | CLIP1    | CAP-Gly domain containing linker protein 1              |
|  | Q5SYC1 | CLVS2    | clavesin 2                                              |
|  | Q8N9A8 | CNEP1R1  | CTD nuclear envelope phosphatase 1 regulatory subunit 1 |
|  | Q6P9H4 | CNKS3    | CNKS3 family member 3                                   |
|  | Q9ULM6 | CNOT6    | CCR4-NOT transcription complex subunit 6                |
|  | Q92600 | CNOT9    | CCR4-NOT transcription complex subunit 9                |
|  | Q12860 | CNTN1    | contactin 1                                             |
|  | Q9Y5P4 | COL4A3BP | collagen type IV alpha 3 binding protein                |

|  |        |         |                                                       |
|--|--------|---------|-------------------------------------------------------|
|  | Q99627 | COPS8   | COP9 signalosome subunit 8                            |
|  | Q9ULV4 | CORO1C  | coronin 1C                                            |
|  | A4D0V7 | CPED1   | cadherin like and PC-esterase domain containing 1     |
|  | P06850 | CRH     | corticotropin releasing hormone                       |
|  | P46109 | CRKL    | CRK like proto-oncogene, adaptor protein              |
|  | O75718 | CRTAP   | cartilage associated protein                          |
|  | Q7Z407 | CSMD3   | CUB and Sushi multiple domains 3                      |
|  | Q9Y6M4 | CSNK1G3 | casein kinase 1 gamma 3                               |
|  | Q05D32 | CTDSPL2 | CTD small phosphatase like 2                          |
|  | P39880 | CUX1    | cut like homeobox 1                                   |
|  | Q15438 | CYTH1   | cytohesin 1                                           |
|  | O43739 | CYTH3   | cytohesin 3                                           |
|  | Q9UI36 | DACH1   | dachshund family transcription factor 1               |
|  | Q96PD2 | DCBLD2  | discoidin, CUB and LCCL domain containing 2           |
|  | Q9BTE7 | DCUN1D5 | defective in cullin neddylation 1 domain containing 5 |
|  | Q96D03 | DDIT4L  | DNA damage inducible transcript 4 like                |
|  | Q6P3S1 | DENND1B | DENN domain containing 1B                             |
|  | Q6IQ26 | DENND5A | DENN domain containing 5A                             |
|  | Q6ZUT9 | DENND5B | DENN domain containing 5B                             |
|  | Q6ICB0 | DESI1   | desumoylating isopeptidase 1                          |
|  | P23743 | DGKA    | diacylglycerol kinase alpha                           |
|  | Q86XP1 | DGKH    | diacylglycerol kinase eta                             |
|  | Q155Q3 | DIXDC1  | DIX domain containing 1                               |
|  | P63167 | DLC1    | DLC1 Rho GTPase activating protein                    |
|  | P51530 | DNA2    | DNA replication helicase/nuclease 2                   |
|  | Q8TBM8 | DNAJB14 | DnaJ heat shock protein family (Hsp40) member B14     |
|  | O75953 | DNAJB5  | DnaJ heat shock protein family (Hsp40) member B5      |
|  | Q9UBS3 | DNAJB9  | DnaJ heat shock protein family (Hsp40) member B9      |
|  | Q13217 | DNAJC3  | DnaJ heat shock protein family (Hsp40) member C3      |

|  |        |         |                                                             |
|--|--------|---------|-------------------------------------------------------------|
|  | Q9UBC3 | DNMT3B  | DNA methyltransferase 3 beta                                |
|  | Q7L8W6 | DPH6    | diphthamine biosynthesis 6                                  |
|  | Q2PZI1 | DPY19L1 | dpy-19 like C-mannosyltransferase 1                         |
|  | Q6ZPD9 | DPY19L3 | dpy-19 like C-mannosyltransferase 3                         |
|  | Q9Y4J8 | DTNA    | dystrobrevin alpha                                          |
|  | P28562 | DUSP1   | dual specificity phosphatase 1                              |
|  | Q86YF9 | DZIP1   | DAZ interacting zinc finger protein 1                       |
|  | Q9BZQ6 | EDEM3   | ER degradation enhancing alpha-mannosidase like protein 3   |
|  | P52799 | EFNB2   | ephrin B2                                                   |
|  | Q9GZT9 | EGLN1   | egl-9 family hypoxia inducible factor 1                     |
|  | Q13144 | EIF2B5  | eukaryotic translation initiation factor 2B subunit epsilon |
|  | O60573 | EIF4E2  | eukaryotic translation initiation factor 4E family member 2 |
|  | Q12926 | ELAVL2  | ELAV like RNA binding protein 2                             |
|  | P41970 | ELK3    | ELK3, ETS transcription factor                              |
|  | P28324 | ELK4    | ELK4, ETS transcription factor                              |
|  | O00472 | ELL2    | elongation factor for RNA polymerase II 2                   |
|  | Q8IZ81 | ELMOD2  | ELMO domain containing 2                                    |
|  | Q15369 | ELOC    | elongin C                                                   |
|  | A6NNW6 | ENO4    | enolase 4                                                   |
|  | Q12929 | EPS8    | epidermal growth factor receptor pathway substrate 8        |
|  | P11308 | ERG     | ETS transcription factor ERG                                |
|  | A6NGS2 | ERICH4  | glutamate rich 4                                            |
|  | Q9UJM3 | ERRFI1  | ERBB receptor feedback inhibitor 1                          |
|  | P62508 | ESRRG   | estrogen related receptor gamma                             |
|  | P14921 | ETS1    | ETS proto-oncogene 1, transcription factor                  |
|  | O60447 | EVI5    | ecotropic viral integration site 5                          |
|  | Q9NVH0 | EXD2    | exonuclease 3'-5' domain containing 2                       |
|  | Q9Y2C4 | EXOG    | exo/endonuclease G                                          |
|  | Q9BPY3 | FAM118B | family with sequence similarity 118 member B                |

|  |        |         |                                                        |
|--|--------|---------|--------------------------------------------------------|
|  | Q6P4D5 | FAM122C | family with sequence similarity 122C                   |
|  | Q8IXS8 | FAM126B | family with sequence similarity 126 member B           |
|  | Q96M60 | FAM227B | family with sequence similarity 227 member B           |
|  | Q9UBU6 | FAM8A1  | family with sequence similarity 8 member A1            |
|  | Q9Y4F1 | FARP1   | FERM, ARH/RhoGEF and pleckstrin domain protein 1       |
|  | Q8TDW7 | FAT3    | FAT atypical cadherin 3                                |
|  | Q8TB52 | FBXO30  | F-box protein 30                                       |
|  | Q7Z6M2 | FBXO33  | F-box protein 33                                       |
|  | Q969H0 | FBXW7   | F-box and WD repeat domain containing 7                |
|  | Q96AC1 | FERMT2  | fermitin family member 2                               |
|  | Q9UHY8 | FEZ2    | fasciculation and elongation protein zeta 2            |
|  | Q13642 | FHL1    | four and a half LIM domains 1                          |
|  | Q5HY92 | FIGN    | fidgetin, microtubule severing factor                  |
|  | A6NMB9 | FIGNL2  | fidgetin like 2                                        |
|  | Q01543 | FLI1    | Fli-1 proto-oncogene, ETS transcription factor         |
|  | Q13045 | FLII    | FLII, actin remodeling protein                         |
|  | P02751 | FN1     | fibronectin 1                                          |
|  | Q53EP0 | FNDC3B  | fibronectin type III domain containing 3B              |
|  | Q12946 | FOXF1   | forkhead box F1                                        |
|  | P55316 | FOXG1   | forkhead box G1                                        |
|  | P32314 | FOXN2   | forkhead box N2                                        |
|  | Q9Y2L6 | FRMD4B  | FERM domain containing 4B                              |
|  | Q96NE9 | FRMD6   | FERM domain containing 6                               |
|  | Q16658 | FSCN1   | fascin actin-bundling protein 1                        |
|  | Q9BXM9 | FSD1L   | fibronectin type III and SPRY domain containing 1 like |
|  | Q12841 | FSTL1   | folliculin like 1                                      |
|  | O75899 | GABBR2  | gamma-aminobutyric acid type B receptor subunit 2      |
|  | Q86XJ1 | GAS2L3  | growth arrest specific 2 like 3                        |
|  | P43694 | GATA4   | GATA binding protein 4                                 |

|        |         |                                                          |
|--------|---------|----------------------------------------------------------|
| P55040 | GEM     | GTP binding protein overexpressed in skeletal muscle     |
| Q14161 | GIT2    | GIT ArfGAP 2                                             |
| P36383 | GJC1    | gap junction protein gamma 1                             |
| Q86VQ1 | GLCCI1  | glucocorticoid induced 1                                 |
| P10071 | GLI3    | GLI family zinc finger 3                                 |
| P50148 | GNAQ    | G protein subunit alpha q                                |
| Q92805 | GOLGA1  | golgin A1                                                |
| Q7Z5G4 | GOLGA7  | golgin A7                                                |
| Q9UKJ3 | GPATCH8 | G-patch domain containing 8                              |
| P51674 | GPM6A   | glycoprotein M6A                                         |
| Q5T848 | GPR158  | G protein-coupled receptor 158                           |
| Q86V85 | GPR180  | G protein-coupled receptor 180                           |
| Q96D09 | GPRASP2 | G protein-coupled receptor associated sorting protein 2  |
| O15217 | GSTA4   | glutathione S-transferase alpha 4                        |
| Q9UKN8 | GTF3C4  | general transcription factor IIIC subunit 4              |
| A4D1E9 | GTPBP10 | GTP binding protein 10                                   |
| Q02108 | GUCY1A1 | guanylate cyclase 1 soluble subunit alpha 1              |
| Q4G148 | GXYLT1  | glucoside xylosyltransferase 1                           |
| Q9UKV0 | HDAC9   | histone deacetylase 9                                    |
| Q9H0R4 | HDHD2   | haloacid dehalogenase like hydrolase domain containing 2 |
| Q5U5R9 | HECTD2  | HECT domain E3 ubiquitin protein ligase 2                |
| Q86Z02 | HIPK1   | homeodomain interacting protein kinase 1                 |
| Q9H422 | HIPK3   | homeodomain interacting protein kinase 3                 |
| Q6NT76 | HMBOX1  | homeobox containing 1                                    |
| O15347 | HMGB3   | high mobility group box 3                                |
| Q14103 | HNRNPD  | heterogeneous nuclear ribonucleoprotein D                |
| Q9UJC3 | HOOK1   | hook microtubule tethering protein 1                     |
| Q86VS8 | HOOK3   | hook microtubule tethering protein 3                     |
| Q7LGA3 | HS2ST1  | heparan sulfate 2-O-sulfotransferase 1                   |

|  |        |          |                                                                    |
|--|--------|----------|--------------------------------------------------------------------|
|  | O14792 | HS3ST1   | heparan sulfate-glucosamine 3-sulfotransferase 1                   |
|  | Q9Y663 | HS3ST3A1 | heparan sulfate-glucosamine 3-sulfotransferase 3A1                 |
|  | P48723 | HSPA13   | heat shock protein family A (Hsp70) member 13                      |
|  | Q5VY09 | IER5     | immediate early response 5                                         |
|  | P11717 | IGF2R    | insulin like growth factor 2 receptor                              |
|  | Q6WRI0 | IGSF10   | immunoglobulin superfamily member 10                               |
|  | Q9UKS7 | IKZF2    | IKAROS family zinc finger 2                                        |
|  | Q96T52 | IMMP2L   | inner mitochondrial membrane peptidase subunit 2                   |
|  | Q96T92 | INSM2    | INSM transcriptional repressor 2                                   |
|  | Q75QN2 | INTS8    | integrator complex subunit 8                                       |
|  | O95373 | IPO7     | importin 7                                                         |
|  | P56199 | ITGA1    | integrin subunit alpha 1                                           |
|  | Q96AA8 | JAKMIP2  | janus kinase and microtubule interacting protein 2                 |
|  | Q86VZ6 | JAZF1    | JAZF zinc finger 1                                                 |
|  | Q9P266 | JCAD     | junctional cadherin 5 associated                                   |
|  | Q9P055 | JKAMP    | JNK1/MAPK8 associated membrane protein                             |
|  | P05412 | JUN      | Jun proto-oncogene, AP-1 transcription factor subunit              |
|  | Q63ZY3 | KANK2    | KN motif and ankyrin repeat domains 2                              |
|  | Q9NZV8 | KCND2    | potassium voltage-gated channel subfamily D member 2               |
|  | O43525 | KCNQ3    | potassium voltage-gated channel subfamily Q member 3               |
|  | Q6ZWB6 | KCTD8    | potassium channel tetramerization domain containing 8              |
|  | Q6UW63 | KDELC1   | KDEL motif containing 1                                            |
|  | Q6ZMT4 | KDM7A    | lysine demethylase 7A                                              |
|  | P35968 | KDR      | kinase insert domain receptor                                      |
|  | Q07666 | KHDRBS1  | KH RNA binding domain containing, signal transduction associated 1 |
|  | O15063 | KIAA0355 | KIAA0355                                                           |
|  | Q15058 | KIF14    | kinesin family member 14                                           |
|  | O43474 | KLF4     | Kruppel like factor 4                                              |

|  |        |        |                                                         |
|--|--------|--------|---------------------------------------------------------|
|  | Q99612 | KLF6   | Kruppel like factor 6                                   |
|  | Q6KB66 | KRT80  | keratin 80                                              |
|  | Q16719 | KYNU   | kynureninase                                            |
|  | Q14739 | LBR    | lamin B receptor                                        |
|  | P48357 | LEPR   | leptin receptor                                         |
|  | Q9Y693 | LHFPL6 | LHFPL tetraspan subfamily member 6                      |
|  | O14910 | LIN7A  | lin-7 homolog A, crumbs cell polarity complex component |
|  | P28300 | LOX    | lysyl oxidase                                           |
|  | Q07954 | LRP1   | LDL receptor related protein 1                          |
|  | Q9NZR2 | LRP1B  | LDL receptor related protein 1B                         |
|  | Q8IWT6 | LRRC8A | leucine rich repeat containing 8 VRAC subunit A         |
|  | P11137 | MAP2   | microtubule associated protein 2                        |
|  | Q13233 | MAP3K1 | mitogen-activated protein kinase kinase kinase 1        |
|  | Q8IVH8 | MAP4K3 | mitogen-activated protein kinase kinase kinase kinase 3 |
|  | O95819 | MAP4K4 | mitogen-activated protein kinase kinase kinase kinase 4 |
|  | Q9Y4K4 | MAP4K5 | mitogen-activated protein kinase kinase kinase kinase 5 |
|  | Q13164 | MAPK7  | mitogen-activated protein kinase 7                      |
|  | Q15691 | MAPRE1 | microtubule associated protein RP/EB family member 1    |
|  | O60337 | MARCH6 | membrane associated ring-CH-type finger 6               |
|  | P29966 | MARCKS | myristoylated alanine rich protein kinase C substrate   |
|  | Q9Y4F3 | MARF1  | meiosis regulator and mRNA stability factor 1           |
|  | P43243 | MATR3  | matrin 3                                                |
|  | Q5VZF2 | MBNL2  | muscleblind like splicing regulator 2                   |
|  | Q9NUK0 | MBNL3  | muscleblind like splicing regulator 3                   |
|  | Q6ZWT7 | MBOAT2 | membrane bound O-acyltransferase domain containing 2    |
|  | Q8NI22 | MCFD2  | multiple coagulation factor deficiency 2                |
|  | Q9UHV7 | MED13  | mediator complex subunit 13                             |
|  | Q86XN8 | MEX3D  | mex-3 RNA binding family member D                       |
|  | Q13361 | MFAP5  | microfibril associated protein 5                        |

|  |        |         |                                                                             |
|--|--------|---------|-----------------------------------------------------------------------------|
|  | Q10469 | MGAT2   | mannosyl (alpha-1,6-)-glycoprotein beta-1,2-N-acetylglucosaminyltransferase |
|  | Q86YT6 | MIB1    | mindbomb E3 ubiquitin protein ligase 1                                      |
|  | Q9NQG6 | MIEF1   | mitochondrial elongation factor 1                                           |
|  | Q8NBR6 | MINDY2  | MINDY lysine 48 deubiquitinase 2                                            |
|  | Q15546 | MMD     | monocyte to macrophage differentiation associated                           |
|  | Q8NHV5 | MOSMO   | modulator of smoothened                                                     |
|  | O75970 | MPDZ    | multiple PDZ domain crumbs cell polarity complex component                  |
|  | Q6WCQ1 | MPRIP   | myosin phosphatase Rho interacting protein                                  |
|  | Q9HCI7 | MSL2    | MSL complex subunit 2                                                       |
|  | P26038 | MSN     | moesin                                                                      |
|  | Q9Y483 | MTF2    | metal response element binding transcription factor 2                       |
|  | Q765P7 | MTSS1L  | MTSS1L, I-BAR domain containing                                             |
|  | P10242 | MYB     | MYB proto-oncogene, transcription factor                                    |
|  | P0CAP1 | MYZAP   | myocardial zonula adherens protein                                          |
|  | Q13506 | NAB1    | NGFI-A binding protein 1                                                    |
|  | Q8WY41 | NANOS1  | nanos C2HC-type zinc finger 1                                               |
|  | Q96NT1 | NAP1L5  | nucleosome assembly protein 1 like 5                                        |
|  | Q14596 | NBR1    | NBR1, autophagy cargo receptor                                              |
|  | O43639 | NCK2    | NCK adaptor protein 2                                                       |
|  | Q15596 | NCOA2   | nuclear receptor coactivator 2                                              |
|  | P62166 | NCS1    | neuronal calcium sensor 1                                                   |
|  | Q96NY8 | NECTIN4 | nectin cell adhesion molecule 4                                             |
|  | Q8NHV4 | NEDD1   | neural precursor cell expressed, developmentally down-regulated 1           |
|  | Q12857 | NFIA    | nuclear factor I A                                                          |
|  | Q13253 | NOG     | noggin                                                                      |
|  | P46531 | NOTCH1  | notch 1                                                                     |
|  | P51513 | NOVA1   | NOVA alternative splicing regulator 1                                       |



|  |        |         |                                                                              |
|--|--------|---------|------------------------------------------------------------------------------|
|  | Q9UNW9 | NOVA2   | NOVA alternative splicing regulator 2                                        |
|  | O15118 | NPC1    | NPC intracellular cholesterol transporter 1                                  |
|  | P06748 | NPM1    | nucleophosmin 1                                                              |
|  | P04150 | NR3C1   | nuclear receptor subfamily 3 group C member 1                                |
|  | O00482 | NR5A2   | nuclear receptor subfamily 5 group A member 2                                |
|  | Q9UHY1 | NRBP1   | nuclear receptor binding protein 1                                           |
|  | Q02297 | NRG1    | neuregulin 1                                                                 |
|  | P20783 | NTF3    | neurotrophin 3                                                               |
|  | Q16620 | NTRK2   | neurotrophic receptor tyrosine kinase 2                                      |
|  | Q9NZJ9 | NUDT4   | nudix hydrolase 4                                                            |
|  | Q7Z417 | NUFIP2  | nuclear FMR1 interacting protein 2                                           |
|  | Q6ZVC0 | NYAP1   | neuronal tyrosine phosphorylated phosphoinositide-3-kinase adaptor 1         |
|  | Q16625 | OCLN    | occludin                                                                     |
|  | Q9BXB4 | OSBPL11 | oxysterol binding protein like 11                                            |
|  | Q86WC4 | OSTM1   | osteoclastogenesis associated transmembrane protein 1                        |
|  | Q01804 | OTUD4   | OTU deubiquitinase 4                                                         |
|  | Q8N573 | OXR1    | oxidation resistance 1                                                       |
|  | Q9NWQ8 | PAG1    | phosphoprotein membrane anchor with glycosphingolipid microdomains 1         |
|  | Q8TAB3 | PCDH19  | protocadherin 19                                                             |
|  | Q15004 | PCLAF   | PCNA clamp associated factor                                                 |
|  | Q96MG8 | PCMTD1  | protein-L-isoaspartate (D-aspartate) O-methyltransferase domain containing 1 |
|  | Q8N165 | PDIK1L  | PDLIM1 interacting kinase 1 like                                             |
|  | Q9NTI5 | PDS5B   | PDS5 cohesin associated factor B                                             |
|  | Q6PCE3 | PGM2L1  | phosphoglucomutase 2 like 1                                                  |
|  | Q96KR7 | PHACTR3 | phosphatase and actin regulator 3                                            |
|  | P78562 | PHEX    | phosphate regulating endopeptidase homolog X-linked                          |

|  |        |         |                                                                        |
|--|--------|---------|------------------------------------------------------------------------|
|  | Q96EK2 | PHF21B  | PHD finger protein 21B                                                 |
|  | Q8N3S3 | PHTF2   | putative homeodomain transcription factor 2                            |
|  | Q8TCG2 | PI4K2B  | phosphatidylinositol 4-kinase type 2 beta                              |
|  | Q9UBF8 | PI4KB   | phosphatidylinositol 4-kinase beta                                     |
|  | Q13492 | PICALM  | phosphatidylinositol binding clathrin assembly protein                 |
|  | P42336 | PIK3CA  | phosphatidylinositol-4,5-bisphosphate 3-kinase catalytic subunit alpha |
|  | Q9Y2I7 | PIKFYVE | phosphoinositide kinase, FYVE-type zinc finger containing              |
|  | Q9P1W9 | PIM2    | Pim-2 proto-oncogene, serine/threonine kinase                          |
|  | Q9BZ71 | PITPNM3 | PITPNM family member 3                                                 |
|  | P98161 | PKD1    | polycystin 1, transient receptor potential channel interacting         |
|  | P61925 | PKIA    | cAMP-dependent protein kinase inhibitor alpha                          |
|  | Q15111 | PLCL1   | phospholipase C like 1 (inactive)                                      |
|  | O14495 | PLPP3   | phospholipid phosphatase 3                                             |
|  | Q7Z2D5 | PLPPR4  | phospholipid phosphatase related 4                                     |
|  | O60486 | PLXNC1  | plexin C1                                                              |
|  | Q13794 | PMAIP1  | phorbol-12-myristate-13-acetate-induced protein 1                      |
|  | Q9UBT6 | POLK    | DNA polymerase kappa                                                   |
|  | Q13136 | PPFIA1  | PTPRF interacting protein alpha 1                                      |
|  | Q8NEY8 | PPHLN1  | periphilin 1                                                           |
|  | O75688 | PPM1B   | protein phosphatase, Mg <sup>2+</sup> /Mn <sup>2+</sup> dependent 1B   |
|  | Q8WY54 | PPM1E   | protein phosphatase, Mg <sup>2+</sup> /Mn <sup>2+</sup> dependent 1E   |
|  | P49593 | PPM1F   | protein phosphatase, Mg <sup>2+</sup> /Mn <sup>2+</sup> dependent 1F   |
|  | Q96QC0 | PPP1R10 | protein phosphatase 1 regulatory subunit 10                            |
|  | Q6NYC8 | PPP1R18 | protein phosphatase 1 regulatory subunit 18                            |
|  | Q9ULJ8 | PPP1R9A | protein phosphatase 1 regulatory subunit 9A                            |
|  | Q96SB3 | PPP1R9B | protein phosphatase 1 regulatory subunit 9B                            |
|  | P30154 | PPP2R1B | protein phosphatase 2 scaffold subunit Abeta                           |
|  | Q16537 | PPP2R5E | protein phosphatase 2 regulatory subunit B'epsilon                     |

|        |           |                                                             |
|--------|-----------|-------------------------------------------------------------|
| Q9NY27 | PPP4R2    | protein phosphatase 4 regulatory subunit 2                  |
| O75626 | PRDM1     | PR/SET domain 1                                             |
| Q9HAZ2 | PRDM16    | PR/SET domain 16                                            |
| P22694 | PRKACB    | protein kinase cAMP-activated catalytic subunit beta        |
| Q13976 | PRKG1     | protein kinase cGMP-dependent 1                             |
| Q9HC23 | PROK2     | prokineticin 2                                              |
| Q2VWP7 | PRTG      | protogenin                                                  |
| Q9Y617 | PSAT1     | phosphoserine aminotransferase 1                            |
| O75475 | PSIP1     | PC4 and SFRS1 interacting protein 1                         |
| Q7Z6K3 | PTAR1     | protein prenyltransferase alpha subunit repeat containing 1 |
| O95758 | PTBP3     | polypyrimidine tract binding protein 3                      |
| P12272 | PTHLH     | parathyroid hormone like hormone                            |
| Q05209 | PTPN12    | protein tyrosine phosphatase, non-receptor type 12          |
| Q15678 | PTPN14    | protein tyrosine phosphatase, non-receptor type 14          |
| Q16825 | PTPN21    | protein tyrosine phosphatase, non-receptor type 21          |
| P23471 | PTPRZ1    | protein tyrosine phosphatase, receptor type Z1              |
| Q8TB72 | PUM2      | pumilio RNA binding family member 2                         |
| Q96PU8 | QKI       | QKI, KH domain containing RNA binding                       |
| Q7L804 | RAB11FIP2 | RAB11 family interacting protein 2                          |
| Q9UL25 | RAB21     | RAB21, member RAS oncogene family                           |
| Q6VN20 | RANBP10   | RAN binding protein 10                                      |
| Q96S59 | RANBP9    | RAN binding protein 9                                       |
| P61224 | RAP1B     | RAP1B, member of RAS oncogene family                        |
| Q9Y3L5 | RAP2C     | RAP2C, member of RAS oncogene family                        |
| Q15283 | RASA2     | RAS p21 protein activator 2                                 |
| Q8NHQ8 | RASSF8    | Ras association domain family member 8                      |
| O43251 | RBFOX2    | RNA binding fox-1 homolog 2                                 |
| A6NFN3 | RBFOX3    | RNA binding fox-1 homolog 3                                 |
| Q9H1K0 | RBSN      | rabenosyn, RAB effector                                     |

|  |        |         |                                                            |
|--|--------|---------|------------------------------------------------------------|
|  | Q8IZV5 | RDH10   | retinol dehydrogenase 10                                   |
|  | P35241 | RDX     | radixin                                                    |
|  | O95980 | RECK    | reversion inducing cysteine rich protein with kazal motifs |
|  | Q9H902 | REEP1   | receptor accessory protein 1                               |
|  | Q9NZL6 | RGL1    | ral guanine nucleotide dissociation stimulator like 1      |
|  | Q4ADV7 | RIC1    | RIC1 homolog, RAB6A GEF complex partner 1                  |
|  | Q9UQ26 | RIMS2   | regulating synaptic membrane exocytosis 2                  |
|  | O43353 | RIPK2   | receptor interacting serine/threonine kinase 2             |
|  | P61587 | RND3    | Rho family GTPase 3                                        |
|  | Q9NV58 | RNF19A  | ring finger protein 19A, RBR E3 ubiquitin protein ligase   |
|  | Q99496 | RNF2    | ring finger protein 2                                      |
|  | P10155 | RO60    | Ro60, Y RNA binding protein                                |
|  | O75116 | ROCK2   | Rho associated coiled-coil containing protein kinase 2     |
|  | P51812 | RPS6KA3 | ribosomal protein S6 kinase A3                             |
|  | P23443 | RPS6KB1 | ribosomal protein S6 kinase B1                             |
|  | Q9Y3B9 | RRP15   | ribosomal RNA processing 15 homolog                        |
|  | Q92541 | RTF1    | RTF1 homolog, Paf1/RNA polymerase II complex component     |
|  | Q8IZC4 | RTKN2   | rhotekin 2                                                 |
|  | Q8N2Y8 | RUSC2   | RUN and SH3 domain containing 2                            |
|  | Q96BU1 | S100PBP | S100P binding protein                                      |
|  | Q8IVN8 | SBSPON  | somatomedin B and thrombospondin type 1 domain containing  |
|  | Q8N9R8 | SCAI    | suppressor of cancer cell invasion                         |
|  | O15126 | SCAMP1  | secretory carrier membrane protein 1                       |
|  | O00767 | SCD     | stearoyl-CoA desaturase                                    |
|  | Q14524 | SCN5A   | sodium voltage-gated channel alpha subunit 5               |
|  | Q9UQD0 | SCN8A   | sodium voltage-gated channel alpha subunit 8               |
|  | Q9NQ03 | SCRT2   | scratch family transcriptional repressor 2                 |
|  | P34741 | SDC2    | syndecan 2                                                 |
|  | Q15436 | SEC23A  | Sec23 homolog A, coat complex II component                 |

|        |           |                                                       |
|--------|-----------|-------------------------------------------------------|
| Q93073 | SECISBP2L | SECIS binding protein 2 like                          |
| Q13275 | SEMA3F    | semaphorin 3F                                         |
| Q8NFY4 | SEMA6D    | semaphorin 6D                                         |
| Q9NRX5 | SERINC1   | serine incorporator 1                                 |
| Q99574 | SERPINI1  | serpin family I member 1                              |
| Q9Y6P5 | SESN1     | sestrin 1                                             |
| P58005 | SESN3     | sestrin 3                                             |
| Q9H9B4 | SFXN1     | sideroflexin 1                                        |
| O43556 | SGCE      | sarcoglycan epsilon                                   |
| Q9BQI5 | SGIP1     | SH3 domain GRB2 like endophilin interacting protein 1 |
| Q9BRV8 | SIKE1     | suppressor of IKBKE 1                                 |
| Q15475 | SIX1      | SIX homeobox 1                                        |
| Q13336 | SLC14A1   | solute carrier family 14 member 1 (Kidd blood group)  |
| P43004 | SLC1A2    | solute carrier family 1 member 2                      |
| Q8NFF2 | SLC24A4   | solute carrier family 24 member 4                     |
| Q96CQ1 | SLC25A36  | solute carrier family 25 member 36                    |
| Q8NEW0 | SLC30A7   | solute carrier family 30 member 7                     |
| Q969S0 | SLC35B4   | solute carrier family 35 member B4                    |
| P0CK97 | SLC35E2A  | solute carrier family 35 member E2A                   |
| P0CK96 | SLC35E2B  | solute carrier family 35 member E2B                   |
| Q15043 | SLC39A14  | solute carrier family 39 member 14                    |
| Q9Y6M7 | SLC4A7    | solute carrier family 4 member 7                      |
| P30531 | SLC6A1    | solute carrier family 6 member 1                      |
| P48066 | SLC6A11   | solute carrier family 6 member 11                     |
| Q8IX21 | SLF2      | SMC5-SMC6 complex localization factor 2               |
| O94813 | SLIT2     | slit guidance ligand 2                                |
| Q96PX8 | SLITRK1   | SLIT and NTRK like family member 1                    |
| Q9H2G2 | SLK       | STE20 like kinase                                     |

|  |        |         |                                                                                                   |
|--|--------|---------|---------------------------------------------------------------------------------------------------|
|  | Q96GM5 | SMARCD1 | SWI/SNF related, matrix associated, actin dependent regulator of chromatin, subfamily d, member 1 |
|  | P08579 | SNRPB2  | small nuclear ribonucleoprotein polypeptide B2                                                    |
|  | P57768 | SNX16   | sorting nexin 16                                                                                  |
|  | P48431 | SOX2    | SRY-box 2                                                                                         |
|  | O60271 | SPAG9   | sperm associated antigen 9                                                                        |
|  | Q7Z6B7 | SRGAP1  | SLIT-ROBO Rho GTPase activating protein 1                                                         |
|  | P30626 | SRI     | sorcini                                                                                           |
|  | Q13043 | STK4    | serine/threonine kinase 4                                                                         |
|  | Q9C0K7 | STRADB  | STE20 related adaptor beta                                                                        |
|  | O43815 | STRN    | striatin                                                                                          |
|  | Q8IWU6 | SULF1   | sulfatase 1                                                                                       |
|  | O60279 | SUSD5   | sushi domain containing 5                                                                         |
|  | Q15022 | SUZ12   | SUZ12, polycomb repressive complex 2 subunit                                                      |
|  | Q6ZW31 | SYDE1   | synapse defective Rho GTPase homolog 1                                                            |
|  | O43426 | SYNJ1   | synaptojanin 1                                                                                    |
|  | Q86TM6 | SYVN1   | synoviolin 1                                                                                      |
|  | Q16514 | TAF12   | TATA-box binding protein associated factor 12                                                     |
|  | Q03519 | TAP2    | transporter 2, ATP binding cassette subfamily B member                                            |
|  | O60347 | TBC1D12 | TBC1 domain family member 12                                                                      |
|  | O75347 | TBCA    | tubulin folding cofactor A                                                                        |
|  | Q9UHD2 | TBK1    | TANK binding kinase 1                                                                             |
|  | Q9BZK7 | TBL1XR1 | transducin beta like 1 X-linked receptor 1                                                        |
|  | O95935 | TBX18   | T-box 18                                                                                          |
|  | Q8N3R3 | TCAIM   | T cell activation inhibitor, mitochondrial                                                        |
|  | Q8NDF8 | TENT4B  | terminal nucleotidyltransferase 4B                                                                |
|  | P05549 | TFAP2A  | transcription factor AP-2 alpha                                                                   |
|  | Q9NVV9 | THAP1   | THAP domain containing 1                                                                          |
|  | Q9H0W7 | THAP2   | THAP domain containing 2                                                                          |

|  |        |          |                                                                        |
|--|--------|----------|------------------------------------------------------------------------|
|  | P16035 | TIMP2    | TIMP metalloproteinase inhibitor 2                                     |
|  | Q9Y490 | TLN1     | talin 1                                                                |
|  | Q9Y4G6 | TLN2     | talin 2                                                                |
|  | Q9UIK5 | TMEFF2   | transmembrane protein with EGF like and two follistatin like domains 2 |
|  | Q6ZRR5 | TMEM136  | transmembrane protein 136                                              |
|  | Q86X19 | TMEM17   | transmembrane protein 17                                               |
|  | Q9NYL9 | TMOD3    | tropomodulin 3                                                         |
|  | Q9H1E5 | TMX4     | thioredoxin related transmembrane protein 4                            |
|  | P50616 | TOB1     | transducer of ERBB2, 1                                                 |
|  | Q9Y4F4 | TOGARAM1 | TOG array regulator of axonemal microtubules 1                         |
|  | Q9Y2L5 | TRAPPC8  | trafficking protein particle complex 8                                 |
|  | Q9UKU6 | TRHDE    | thyrotropin releasing hormone degrading enzyme                         |
|  | P36406 | TRIM23   | tripartite motif containing 23                                         |
|  | Q9UPN9 | TRIM33   | tripartite motif containing 33                                         |
|  | Q9P272 | TRMT9B   | tRNA methyltransferase 9B (putative)                                   |
|  | Q15714 | TSC22D1  | TSC22 domain family member 1                                           |
|  | O75157 | TSC22D2  | TSC22 domain family member 2                                           |
|  | Q9BXA7 | TSSK1B   | testis specific serine kinase 1B                                       |
|  | P07437 | TUBB     | tubulin beta class I                                                   |
|  | Q712K3 | UBE2R2   | ubiquitin conjugating enzyme E2 R2                                     |
|  | Q96B02 | UBE2W    | ubiquitin conjugating enzyme E2 W                                      |
|  | Q6BDS2 | UHRF1BP1 | UHRF1 binding protein 1                                                |
|  | Q8IYT8 | ULK2     | unc-51 like autophagy activating kinase 2                              |
|  | Q9UHP3 | USP25    | ubiquitin specific peptidase 25                                        |
|  | A6NNY8 | USP27X   | ubiquitin specific peptidase 27 X-linked                               |
|  | Q92738 | USP6NL   | USP6 N-terminal like                                                   |
|  | Q7L8A9 | VASH1    | vasohibin 1                                                            |
|  | Q86V25 | VASH2    | vasohibin 2                                                            |

|  |        |         |                                                                              |
|--|--------|---------|------------------------------------------------------------------------------|
|  | Q9HCJ6 | VAT1L   | vesicle amine transport 1 like                                               |
|  | P15692 | VEGFA   | vascular endothelial growth factor A                                         |
|  | P98155 | VLDLR   | very low density lipoprotein receptor                                        |
|  | Q7Z5K2 | WAPL    | WAPL cohesin release factor                                                  |
|  | Q92558 | WASF1   | WAS protein family member 1                                                  |
|  | Q9UPY6 | WASF3   | WAS protein family member 3                                                  |
|  | Q6UXN9 | WDR82   | WD repeat domain 82                                                          |
|  | O43516 | WIPF1   | WAS/WASL interacting protein family member 1                                 |
|  | Q9UBV4 | WNT16   | Wnt family member 16                                                         |
|  | Q9ULE0 | WWC3    | WWC family member 3                                                          |
|  | Q5GH76 | XKR4    | XK related 4                                                                 |
|  | Q9H6D3 | XKR8    | XK related 8                                                                 |
|  | Q96QA6 | YPEL2   | yippee like 2                                                                |
|  | P31946 | YWHAB   | tyrosine 3-monooxygenase/tryptophan 5-monooxygenase activation protein beta  |
|  | P61981 | YWHAG   | tyrosine 3-monooxygenase/tryptophan 5-monooxygenase activation protein gamma |
|  | Q96DT7 | ZBTB10  | zinc finger and BTB domain containing 10                                     |
|  | Q8NAP3 | ZBTB38  | zinc finger and BTB domain containing 38                                     |
|  | Q9UPT8 | ZC3H4   | zinc finger CCCH-type containing 4                                           |
|  | P61129 | ZC3H6   | zinc finger CCCH-type containing 6                                           |
|  | Q8N2G6 | ZCCHC24 | zinc finger CCHC-type containing 24                                          |
|  | Q8IVQ6 | ZDHHC21 | zinc finger DHHC-type containing 21                                          |
|  | P37275 | ZEB1    | zinc finger E-box binding homeobox 1                                         |
|  | O60315 | ZEB2    | zinc finger E-box binding homeobox 2                                         |
|  | Q6FIF0 | ZFAND6  | zinc finger AN1-type containing 6                                            |
|  | Q8WW38 | ZFPM2   | zinc finger protein, FOG family member 2                                     |
|  | P17010 | ZFX     | zinc finger protein X-linked                                                 |
|  | Q15776 | ZKSCAN8 | zinc finger with KRAB and SCAN domains 8                                     |



|            |                                         |            |         |                                                                                                                                                                                                                                                                                                                        |
|------------|-----------------------------------------|------------|---------|------------------------------------------------------------------------------------------------------------------------------------------------------------------------------------------------------------------------------------------------------------------------------------------------------------------------|
|            |                                         | Q9HA38     | ZMAT3   | zinc finger matrin-type 3                                                                                                                                                                                                                                                                                              |
|            |                                         | P52739     | ZNF131  | zinc finger protein 131                                                                                                                                                                                                                                                                                                |
|            |                                         | O75362     | ZNF217  | zinc finger protein 217                                                                                                                                                                                                                                                                                                |
|            |                                         | Q9NZL3     | ZNF224  | zinc finger protein 224                                                                                                                                                                                                                                                                                                |
|            |                                         | Q5BKZ1     | ZNF326  | zinc finger protein 326                                                                                                                                                                                                                                                                                                |
|            |                                         | Q9HCE3     | ZNF532  | zinc finger protein 532                                                                                                                                                                                                                                                                                                |
|            |                                         | Q9Y462     | ZNF711  | zinc finger protein 711                                                                                                                                                                                                                                                                                                |
|            |                                         | Q9H7M6     | ZSWIM4  | zinc finger SWIM-type containing 4                                                                                                                                                                                                                                                                                     |
|            |                                         | Q9C0D3     | ZYG11B  | zyg-11 family member B, cell cycle regulator                                                                                                                                                                                                                                                                           |
|            |                                         | A0A024R3P9 | ACBD3   | Acyl-Coenzyme A binding domain containing 3, isoform CRA_a                                                                                                                                                                                                                                                             |
| TargetScan | miR-222-5p<br>Downregulated 24<br>hours | Q99996     | AKAP9   | A-kinase anchor protein 9 (AKAP-9) (A-kinase anchor protein 350 kDa) (AKAP 350) (hgAKAP 350) (A-kinase anchor protein 450 kDa) (AKAP 450) (AKAP 120-like protein) (Centrosome- and Golgi-localized PKN-associated protein) (CG-NAP) (Protein hyperion) (Protein kinase A-anchoring protein 9) (PRKA9) (Protein yotiao) |
|            |                                         | P51648     | ALDH3A2 | Aldehyde dehydrogenase family 3 member A2 (EC 1.2.1.3) (EC 1.2.1.94) (Aldehyde dehydrogenase 10) (Fatty aldehyde dehydrogenase) (Microsomal aldehyde dehydrogenase)                                                                                                                                                    |
|            |                                         | Q86XS5     | ANGPTL5 | Angiopoietin-related protein 5 (Angiopoietin-like protein 5)                                                                                                                                                                                                                                                           |
|            |                                         | A6NGH8     | ANKRD61 | Ankyrin repeat domain-containing protein 61                                                                                                                                                                                                                                                                            |
|            |                                         | P02749     | APOH    | Beta-2-glycoprotein 1 (APC inhibitor) (Activated protein C-binding protein) (Anticardiolipin cofactor) (Apolipoprotein H) (Apo-H) (Beta-2-glycoprotein I) (B2GPI) (Beta(2)GPI)                                                                                                                                         |
|            |                                         |            |         |                                                                                                                                                                                                                                                                                                                        |

|  |        |         |                                                                                                                                                                                                                                                                                 |
|--|--------|---------|---------------------------------------------------------------------------------------------------------------------------------------------------------------------------------------------------------------------------------------------------------------------------------|
|  | P24539 | ATP5F1  | ATP synthase F(0) complex subunit C3, mitochondrial (ATP synthase lipid-binding protein) (ATP synthase membrane subunit c locus 3) (ATP synthase proteolipid P3) (ATP synthase proton-transporting mitochondrial F(0) complex subunit C3) (ATPase protein 9) (ATPase subunit c) |
|  | Q9BXK5 | BCL2L13 | Bcl-2-like protein 13 (Bcl2-L-13) (Bcl-rambo) (Protein Mil1)                                                                                                                                                                                                                    |
|  | Q9Y5K6 | CD2AP   | Cyclin-G1 (Cyclin-G)                                                                                                                                                                                                                                                            |
|  | Q49AH0 | CDNF    | CDKN2A-interacting protein (Collaborator of ARF)                                                                                                                                                                                                                                |
|  | Q8N0S6 | CENPL   | CENPB DNA-binding domain-containing protein 1                                                                                                                                                                                                                                   |
|  | Q9Y281 | CFL2    | Cofilin-2 (Cofilin, muscle isoform)                                                                                                                                                                                                                                             |
|  | P20309 | CHRM3   | Serine/threonine-protein kinase Chk2 (EC 2.7.11.1) (CHK2 checkpoint homolog) (Cds1 homolog) (Hucds1) (hCds1) (Checkpoint kinase 2)                                                                                                                                              |
|  | P61024 | CKS1B   | Cytoskeleton-associated protein 4 (63-kDa cytoskeleton-linking membrane protein) (Climp-63) (p63)                                                                                                                                                                               |
|  | Q8IUQ0 | CLVS1   | Calsyntenin-1 (Alcadein-alpha) (Alc-alpha) (Alzheimer-related cadherin-like protein) (Non-classical cadherin XB31alpha) [Cleaved into: Soluble Alc-alpha (SAlc-alpha); CTF1-alpha (C-terminal fragment 1-alpha)]                                                                |
|  | A4D2H0 | CTAGE15 | cTAGE family member 15                                                                                                                                                                                                                                                          |
|  | Q86UF2 | CTAGE6  | cTAGE family member 6                                                                                                                                                                                                                                                           |
|  | O14625 | CXCL11  | C-X-C motif chemokine 11                                                                                                                                                                                                                                                        |
|  | Q6ZMK1 | CYHR1   | Cysteine and histidine-rich protein 1                                                                                                                                                                                                                                           |
|  | O95786 | DDX58   | Antiviral innate immune response receptor RIG-I                                                                                                                                                                                                                                 |
|  | Q8WUY9 | DEPDC1B | DEP domain-containing protein 1B                                                                                                                                                                                                                                                |
|  | Q9NYP3 | DONSON  | Protein downstream neighbor of Son (B17)                                                                                                                                                                                                                                        |
|  | Q92784 | DPF3    | Zinc finger protein DPF3                                                                                                                                                                                                                                                        |
|  | Q7L2H7 | EIF3M   | Eukaryotic translation initiation factor 3 subunit M                                                                                                                                                                                                                            |
|  | Q6IPR1 | ETFRF1  | electron transfer flavoprotein regulatory factor 1                                                                                                                                                                                                                              |

|  |        |        |                                                                                                                                                                                                                                                                                                                                                                                            |
|--|--------|--------|--------------------------------------------------------------------------------------------------------------------------------------------------------------------------------------------------------------------------------------------------------------------------------------------------------------------------------------------------------------------------------------------|
|  | O60447 | EVI5   | Ecotropic viral integration site 5 protein homolog                                                                                                                                                                                                                                                                                                                                         |
|  | O43320 | FGF16  | Fibroblast growth factor 16 (FGF-16)                                                                                                                                                                                                                                                                                                                                                       |
|  | P21781 | FGF7   | Fibroblast growth factor 7 (FGF-7) (Heparin-binding growth factor 7) (HBGF-7) (Keratinocyte growth factor)                                                                                                                                                                                                                                                                                 |
|  | P14867 | GABRA1 | Gamma-aminobutyric acid receptor subunit alpha-1 (GABA(A) receptor subunit alpha-1)                                                                                                                                                                                                                                                                                                        |
|  | Q9UG22 | GIMAP2 | GTPase IMAF family member 2 (Immunity-associated protein 2) (hIMAP2)                                                                                                                                                                                                                                                                                                                       |
|  | Q03113 | GNA12  | Guanine nucleotide-binding protein subunit alpha-12 (G alpha-12) (G-protein subunit alpha-12)                                                                                                                                                                                                                                                                                              |
|  | Q3T906 | GNPTAB | N-acetylglucosamine-1-phosphotransferase subunits alpha/beta (EC 2.7.8.17) (GlcNAc-1-phosphotransferase subunits alpha/beta) (Stealth protein GNPTAB) (UDP-N-acetylglucosamine-1-phosphotransferase subunits alpha/beta) [Cleaved into: N-acetylglucosamine-1-phosphotransferase subunit alpha; N-acetylglucosamine-1-phosphotransferase subunit beta]                                     |
|  | O95249 | GOSR1  | Golgi SNAP receptor complex member 1 (28 kDa Golgi SNARE protein) (28 kDa cis-Golgi SNARE p28) (GOS-28)                                                                                                                                                                                                                                                                                    |
|  | Q53EU6 | GPAT3  | Glycerol-3-phosphate acyltransferase 3 (GPAT-3) (EC 2.3.1.15) (1-acyl-sn-glycerol-3-phosphate O-acyltransferase 10) (AGPAT 10) (1-acyl-sn-glycerol-3-phosphate O-acyltransferase 9) (1-AGPAT 9) (EC 2.3.1.51) (Acyl-CoA:glycerol-3-phosphate acyltransferase 3) (hGPAT3) (Lung cancer metastasis-associated protein 1) (Lysophosphatidic acid acyltransferase theta) (LPAAT-theta) (MAG-1) |
|  | Q9NYM4 | GPR83  | Probable G-protein coupled receptor 83 (G-protein coupled receptor 72)                                                                                                                                                                                                                                                                                                                     |
|  | Q6UWX4 | HHIPL2 | HHIP-like protein 2                                                                                                                                                                                                                                                                                                                                                                        |

|        |           |                                                                                                                                                                                                                                       |
|--------|-----------|---------------------------------------------------------------------------------------------------------------------------------------------------------------------------------------------------------------------------------------|
| P01889 | HLA-B     | HLA class I histocompatibility antigen, B alpha chain (Human leukocyte antigen B) (HLA-B)                                                                                                                                             |
| Q8IZT8 | HS3ST5    | Heparan sulfate glucosamine 3-O-sulfotransferase 5 (EC 2.8.2.23) (Heparan sulfate D-glucosaminyl 3-O-sulfotransferase 5) (3-OST-5) (Heparan sulfate 3-O-sulfotransferase 5) (h3-OST-5)                                                |
| Q3SXM5 | HSDL1     | Inactive hydroxysteroid dehydrogenase-like protein 1 (Short chain dehydrogenase/reductase family 12C member 3)                                                                                                                        |
| Q02363 | ID2       | DNA-binding protein inhibitor ID-2 (Class B basic helix-loop-helix protein 26) (bHLHb26) (Inhibitor of DNA binding 2) (Inhibitor of differentiation 2)                                                                                |
| O95239 | KIF4A     | Chromosome-associated kinesin KIF4A                                                                                                                                                                                                   |
| Q3LI77 | KRTAP13-4 | Keratin-associated protein 5-3 (Keratin-associated protein 5-9) (Keratin-associated protein 5.3) (Keratin-associated protein 5.9) (UHS KerB-like) (Ultrahigh sulfur keratin-associated protein 5.3)                                   |
| A6NK58 | LIPT2     | Putative lipoyltransferase 2, mitochondrial (EC 2.3.1.181) (Lipoate-protein ligase B) (Lipoyl/octanoyl transferase) (Octanoyl-[acyl-carrier-protein]-protein N-octanoyltransferase)                                                   |
| Q8TAP4 | LMO3      | LIM domain only protein 3 (LMO-3) (Neuronal-specific transcription factor DAT1) (Rhombotin-3)                                                                                                                                         |
| Q5VT66 | MARC1     | Mitochondrial amidoxime-reducing component 1 (mARC1) (EC 1.7.-.-) (Molybdenum cofactor sulfuryase C-terminal domain-containing protein 1) (MOSC domain-containing protein 1) (Moco sulfuryase C-terminal domain-containing protein 1) |
| P11226 | MBL2      | Mannose-binding protein C (MBP-C) (Collectin-1) (MBP1) (Mannan-binding protein) (Mannose-binding lectin)                                                                                                                              |
| Q96LB0 | MRGPRX3   | Mas-related G-protein coupled receptor member X3 (Sensory neuron-specific G-protein coupled receptor 1/2)                                                                                                                             |

|  |  |        |         |                                                                                                                                                                                                                                                                         |
|--|--|--------|---------|-------------------------------------------------------------------------------------------------------------------------------------------------------------------------------------------------------------------------------------------------------------------------|
|  |  | Q9NX20 | MRPL16  | 39S ribosomal protein L16, mitochondrial (L16mt) (MRP-L16) (Mitochondrial large ribosomal subunit protein uL16m)                                                                                                                                                        |
|  |  | P13995 | MTHFD2  | Bifunctional methylenetetrahydrofolate dehydrogenase/cyclohydrolase, mitochondrial [Includes: NAD-dependent methylenetetrahydrofolate dehydrogenase (EC 1.5.1.15); Methenyltetrahydrofolate cyclohydrolase (EC 3.5.4.9)]                                                |
|  |  | Q9UBE8 | NLK     | Neuropilin and tolloid-like protein 1 (Brain-specific transmembrane protein containing 2 CUB and 1 LDL-receptor class A domains protein 1)                                                                                                                              |
|  |  | Q9BZ95 | NSD3    | Histone-lysine N-methyltransferase NSD3 (EC 2.1.1.-) (Nuclear SET domain-containing protein 3) (Protein whistle) (WHSC1-like 1 isoform 9 with methyltransferase activity to lysine) (Wolf-Hirschhorn syndrome candidate 1-like protein 1) (WHSC1-like protein 1)        |
|  |  | P49757 | NUMB    | Protein numb homolog (h-Numb) (Protein S171)                                                                                                                                                                                                                            |
|  |  | Q9P0S3 | ORMDL1  | ORM1-like protein 1 (Adoplin-1)                                                                                                                                                                                                                                         |
|  |  | Q96FC7 | PHYHIPL | Phosphoinositide 3-kinase regulatory subunit 5 (PI3-kinase regulatory subunit 5) (PI3-kinase p101 subunit) (Phosphatidylinositol 4,5-bisphosphate 3-kinase regulatory subunit) (PtdIns-3-kinase regulatory subunit) (Protein FOAP-2) (PtdIns-3-kinase p101) (p101-PI3K) |
|  |  | Q12796 | PNRC1   | Protein O-glucosyltransferase 1 (EC 2.4.1.-) (CAP10-like 46 kDa protein) (hCLP46) (KTEL motif-containing protein 1) (Myelodysplastic syndromes relative protein) (O-glucosyltransferase Rumi homolog) (hRumi) (Protein O-xylosyltransferase POGLUT1) (EC 2.4.2.26)      |
|  |  | Q8WVI7 | PPP1R1C | Protein phosphatase 1 regulatory subunit 1C                                                                                                                                                                                                                             |
|  |  | Q96BW5 | PTER    | Phosphotriesterase-related protein                                                                                                                                                                                                                                      |
|  |  | Q9H0N0 | RAB6C   | Ras-related protein Rab-6C                                                                                                                                                                                                                                              |

|  |        |          |                                                                                                                                                       |
|--|--------|----------|-------------------------------------------------------------------------------------------------------------------------------------------------------|
|  | O60896 | RAMP3    | Receptor activity-modifying protein 3                                                                                                                 |
|  | P10114 | RAP2A    | Ras-related protein Rap-2a                                                                                                                            |
|  | P06400 | RB1      | Retinoblastoma-associated protein                                                                                                                     |
|  | Q8WVD5 | RNF141   | RING finger protein 141                                                                                                                               |
|  | Q9H6T3 | RPAP3    | RNA polymerase II-associated protein 3                                                                                                                |
|  | O00767 | SCD      | Stearoyl-CoA desaturase                                                                                                                               |
|  | P49908 | SELENOP  | Selenoprotein P                                                                                                                                       |
|  | P07093 | SERPINE2 | Glia-derived nexin                                                                                                                                    |
|  | Q8NCS7 | SLC44A5  | Choline transporter-like protein 5                                                                                                                    |
|  | Q8TCU3 | SLC7A13  | Solute carrier family 7 member 13                                                                                                                     |
|  | A7E240 | SLC8A3   | SLC8A3 protein                                                                                                                                        |
|  | Q6IEE8 | SLFN12L  | Schlafen family member 12-like                                                                                                                        |
|  | Q9BQ49 | SMIM7    | Small integral membrane protein 7                                                                                                                     |
|  | O14508 | SOCS2    | Suppressor of cytokine signaling 2                                                                                                                    |
|  | P0C7L1 | SPINK8   | Serine protease inhibitor Kazal-type 8                                                                                                                |
|  | O95793 | STAU1    | Double-stranded RNA-binding protein Staufen homolog 1                                                                                                 |
|  | Q9ULQ0 | STRIP2   | Striatin-interacting protein 2                                                                                                                        |
|  | Q96NH3 | TBC1D32  | Protein broad-minded                                                                                                                                  |
|  | Q0IIM8 | TBC1D8B  | TBC1 domain family member 8B                                                                                                                          |
|  | Q96QE5 | TEFM     | Transcription elongation factor, mitochondrial                                                                                                        |
|  | O14948 | TFEC     | Transcription factor EC (TFE-C) (Class E basic helix-loop-helix protein 34) (bHLHe34) (Transcription factor EC-like) (hTFEC-L)                        |
|  | Q9NUM4 | TMEM106B | Transmembrane protein 106B                                                                                                                            |
|  | Q9NS68 | TNFRSF19 | Tumor necrosis factor receptor superfamily member 19 (TRADE) (Toxicity and JNK inducer)                                                               |
|  | P50591 | TNFSF10  | Tumor necrosis factor ligand superfamily member 10 (Apo-2 ligand) (Apo-2L) (TNF-related apoptosis-inducing ligand) (Protein TRAIL) (CD antigen CD253) |

|       |        |          |                                                                                                                                                                        |
|-------|--------|----------|------------------------------------------------------------------------------------------------------------------------------------------------------------------------|
| miRDB | P62995 | TRA2B    | Transformer-2 protein homolog beta (TRA-2 beta) (TRA2-beta) (hTRA2-beta) (Splicing factor, arginine/serine-rich 10) (Transformer-2 protein homolog B)                  |
|       | Q6PF06 | TRMT10B  | tRNA methyltransferase 10 homolog B (EC 2.1.1.221) (RNA (guanine-9-)-methyltransferase domain-containing protein 3) (tRNA (guanine(9)-N(1))-methyltransferase TRMT10B) |
|       | Q9BVS5 | TRMT61B  | tRNA (adenine(58)-N(1))-methyltransferase, mitochondrial (EC 2.1.1.220) (mRNA methyladenosine-N(1)-methyltransferase) (EC 2.1.1.-)                                     |
|       | Q8IYU4 | UBQLNL   | Ubiquilin-like protein                                                                                                                                                 |
|       | Q96BW1 | UPRT     | Uracil phosphoribosyltransferase homolog                                                                                                                               |
|       | Q8IUA0 | WFDC8    | WAP four-disulfide core domain protein 8 (Putative protease inhibitor WAP8)                                                                                            |
|       | Q14593 | ZNF273   | Zinc finger protein 273 (Zinc finger protein HZF9)                                                                                                                     |
|       | P35789 | ZNF93    | Zinc finger protein 93 (Zinc finger protein 505) (Zinc finger protein HTF34)                                                                                           |
|       | Q62005 | Zp1      | Zona pellucida sperm-binding protein 1 (Zona pellucida glycoprotein 1) (Zp-1) [Cleaved into: Processed zona pellucida sperm-binding protein 1]                         |
|       | Q15019 | SEPT2    | septin 2                                                                                                                                                               |
|       | O94929 | ABLIM3   | actin binding LIM protein family member 3                                                                                                                              |
|       | O15072 | ADAMTS3  | ADAM metallopeptidase with thrombospondin type 1 motif 3                                                                                                               |
|       | P82987 | ADAMTSL3 | ADAMTS like 3                                                                                                                                                          |
|       | Q09666 | AHNAK    | AHNAK nucleoprotein                                                                                                                                                    |
|       | Q9UIJ7 | AK3      | adenylate kinase 3                                                                                                                                                     |
|       | Q99996 | AKAP9    | A-kinase anchoring protein 9                                                                                                                                           |
|       | P51648 | ALDH3A2  | aldehyde dehydrogenase 3 family member A2                                                                                                                              |
|       | Q9H161 | ALX4     | ALX homeobox 4                                                                                                                                                         |
|       | Q86XS5 | ANGPTL5  | angiopoietin like 5                                                                                                                                                    |

|        |           |                                                             |
|--------|-----------|-------------------------------------------------------------|
| O75179 | ANKRD17   | ankyrin repeat domain 17                                    |
| Q8N8A2 | ANKRD44   | ankyrin repeat domain 44                                    |
| Q86W74 | ANKRD46   | ankyrin repeat domain 46                                    |
| Q9BZZ5 | API5      | apoptosis inhibitor 5                                       |
| P02749 | APOH      | apolipoprotein H                                            |
| Q15041 | ARL6IP1   | ADP ribosylation factor like GTPase 6 interacting protein 1 |
| Q8N6S5 | ARL6IP6   | ADP ribosylation factor like GTPase 6 interacting protein 6 |
| P15848 | ARSB      | arylsulfatase B                                             |
| Q12797 | ATAD1     | ATPase family, AAA domain containing 1                      |
| P48201 | ATP5MC3   | ATP synthase membrane subunit c locus 3                     |
| Q8NEY4 | ATP6V1C2  | ATPase H <sup>+</sup> transporting V1 subunit C2            |
| Q9H7T9 | AUNIP     | aurora kinase A and ninein interacting protein              |
| O75815 | BCAR3     | BCAR3, NSP family adaptor protein                           |
| Q9NYF8 | BCLAF1    | BCL2 associated transcription factor 1                      |
| A8MU93 | C17orf100 | chromosome 17 open reading frame 100                        |
| Q8IXQ3 | C9orf40   | chromosome 9 open reading frame 40                          |
| Q05682 | CALD1     | caldesmon 1                                                 |
| Q9Y6Q1 | CAPN6     | calpain 6                                                   |
| Q14444 | CAPRIN1   | cell cycle associated protein 1                             |
| A6NKD9 | CCDC85C   | coiled-coil domain containing 85C                           |
| Q3V6T2 | CCDC88A   | coiled-coil domain containing 88A                           |
| Q9Y5K6 | CD2AP     | CD2 associated protein                                      |
| Q9HCU4 | CELSR2    | cadherin EGF LAG seven-pass G-type receptor 2               |
| Q5SZL2 | CEP85L    | centrosomal protein 85 like                                 |
| Q9Y281 | CFL2      | cofilin 2                                                   |
| Q70JA7 | CHSY3     | chondroitin sulfate synthase 3                              |
| P21554 | CNR1      | cannabinoid receptor 1                                      |
| Q99715 | COL12A1   | collagen type XII alpha 1 chain                             |
| Q92793 | CREBBP    | CREB binding protein                                        |



|  |        |         |                                                           |
|--|--------|---------|-----------------------------------------------------------|
|  | Q13617 | CUL2    | cullin 2                                                  |
|  | P11511 | CYP19A1 | cytochrome P450 family 19 subfamily A member 1            |
|  | Q9NX09 | DDIT4   | DNA damage inducible transcript 4                         |
|  | O95786 | DDX58   | DExH/H-box helicase 58                                    |
|  | Q8WUY9 | DEPDC1B | DEP domain containing 1B                                  |
|  | Q86Y56 | DNAAF5  | dynein axonemal assembly factor 5                         |
|  | Q96M86 | DNHD1   | dynein heavy chain domain 1                               |
|  | O94769 | ECM2    | extracellular matrix protein 2                            |
|  | Q92611 | EDEM1   | ER degradation enhancing alpha-mannosidase like protein 1 |
|  | Q96C19 | EFHD2   | EF-hand domain family member D2                           |
|  | Q8N766 | EMC1    | ER membrane protein complex subunit 1                     |
|  | Q09472 | EP300   | E1A binding protein p300                                  |
|  | P54756 | EPHA5   | EPH receptor A5                                           |
|  | Q8IV48 | ERI1    | exoribonuclease 1                                         |
|  | O60447 | EVI5    | ecotropic viral integration site 5                        |
|  | Q9BXW9 | FANCD2  | FA complementation group D2                               |
|  | Q96IG2 | FBXL20  | F-box and leucine rich repeat protein 20                  |
|  | P10109 | FDX1    | ferredoxin 1                                              |
|  | P09038 | FGF2    | fibroblast growth factor 2                                |
|  | P21781 | FGF7    | fibroblast growth factor 7                                |
|  | Q5TBA9 | FRY     | FRY microtubule binding protein                           |
|  | A1L4K1 | FSD2    | fibronectin type III and SPRY domain containing 2         |
|  | P51114 | FXR1    | FMR1 autosomal homolog 1                                  |
|  | Q9UN86 | G3BP2   | G3BP stress granule assembly factor 2                     |
|  | Q9NQR9 | G6PC2   | glucose-6-phosphatase catalytic subunit 2                 |
|  | Q86SF2 | GALNT7  | polypeptide N-acetylgalactosaminyltransferase 7           |
|  | Q02742 | GCNT1   | glucosaminyl (N-acetyl) transferase 1                     |
|  | Q9UG22 | GIMAP2  | GTPase, IMAP family member 2                              |
|  | Q03113 | GNA12   | G protein subunit alpha 12                                |

|  |        |          |                                                                     |
|--|--------|----------|---------------------------------------------------------------------|
|  | Q3T906 | GNPTAB   | N-acetylglucosamine-1-phosphate transferase subunits alpha and beta |
|  | O00461 | GOLIM4   | golgi integral membrane protein 4                                   |
|  | Q8N3F9 | GPR137C  | G protein-coupled receptor 137C                                     |
|  | Q9NYM4 | GPR83    | G protein-coupled receptor 83                                       |
|  | P52655 | GTF2A1   | general transcription factor IIA subunit 1                          |
|  | P33402 | GUCY1A2  | guanylate cyclase 1 soluble subunit alpha 2                         |
|  | O14792 | HS2ST1   | heparan sulfate 2-O-sulfotransferase 1                              |
|  | Q8IZT8 | HS3ST5   | heparan sulfate-glucosamine 3-sulfotransferase 5                    |
|  | Q4G112 | HSF5     | heat shock transcription factor 5                                   |
|  | P11021 | HSPA5    | heat shock protein family A (Hsp70) member 5                        |
|  | Q9ULR0 | ISY1     | ISY1 splicing factor homolog                                        |
|  | P26006 | ITGA3    | integrin subunit alpha 3                                            |
|  | P23229 | ITGA6    | integrin subunit alpha 6                                            |
|  | Q13572 | ITPK1    | inositol-tetrakisphosphate 1-kinase                                 |
|  | Q9H079 | KATNBL1  | katanin regulatory subunit B1 like 1                                |
|  | O15550 | KDM6A    | lysine demethylase 6A                                               |
|  | Q9UH77 | KLHL3    | kelch like family member 3                                          |
|  | A6PVL3 | KNCN     | kinocilin                                                           |
|  | Q6ZN17 | LIN28B   | lin-28 homolog B                                                    |
|  | Q6P1M3 | LLGL2    | LLGL scribble cell polarity complex component 2                     |
|  | Q99677 | LPAR4    | lysophosphatidic acid receptor 4                                    |
|  | P98164 | LRP2     | LDL receptor related protein 2                                      |
|  | O43300 | LRRTM2   | leucine rich repeat transmembrane neuronal 2                        |
|  | Q9NU23 | LYRM2    | LYR motif containing 2                                              |
|  | Q99683 | MAP3K5   | mitogen-activated protein kinase kinase kinase 5                    |
|  | P49137 | MAPKAPK2 | mitogen-activated protein kinase-activated protein kinase 2         |
|  | O95243 | MBD4     | methyl-CpG binding domain 4, DNA glycosylase                        |

|        |         |                                                                                                      |
|--------|---------|------------------------------------------------------------------------------------------------------|
| P13995 | MTHFD2  | methylenetetrahydrofolate dehydrogenase (NADP+ dependent) 2, methenyltetrahydrofolate cyclohydrolase |
| Q96BF6 | NACC2   | NACC family member 2                                                                                 |
| Q15788 | NCOA1   | nuclear receptor coactivator 1                                                                       |
| O95139 | NDUFB6  | NADH:ubiquinone oxidoreductase subunit B6                                                            |
| Q92692 | NECTIN2 | nectin cell adhesion molecule 2                                                                      |
| Q9UBE8 | NLK     | nemo like kinase                                                                                     |
| Q9Y5X4 | NR2E3   | nuclear receptor subfamily 2 group E member 3                                                        |
| Q02297 | NRG1    | neuregulin 1                                                                                         |
| Q7Z417 | NUFIP2  | nuclear FMR1 interacting protein 2                                                                   |
| P61970 | NUTF2   | nuclear transport factor 2                                                                           |
| Q9ULI1 | NWD2    | NACHT and WD repeat domain containing 2                                                              |
| Q9P0S3 | ORMDL1  | ORMDL sphingolipid biosynthesis regulator 1                                                          |
| Q8N6M0 | OTUD6B  | OTU domain containing 6B                                                                             |
| O96013 | PAK4    | p21 (RAC1) activated kinase 4                                                                        |
| Q96IZ0 | PAWR    | pro-apoptotic WT1 regulator                                                                          |
| O14917 | PCDH17  | protocadherin 17                                                                                     |
| O60245 | PCDH7   | protocadherin 7                                                                                      |
| Q86SE9 | PCGF5   | polycomb group ring finger 5                                                                         |
| Q07343 | PDE4B   | phosphodiesterase 4B                                                                                 |
| Q29RF7 | PDS5A   | PDS5 cohesin associated factor A                                                                     |
| Q96FC7 | PHYHIPL | phytanoyl-CoA 2-hydroxylase interacting protein like                                                 |
| P37287 | PIGA    | phosphatidylinositol glycan anchor biosynthesis class A                                              |
| O14495 | PLPP3   | phospholipid phosphatase 3                                                                           |
| Q12796 | PNRC1   | proline rich nuclear receptor coactivator 1                                                          |
| Q15165 | PON2    | paraoxonase 2                                                                                        |
| Q8N3J5 | PPM1K   | protein phosphatase, Mg <sup>2+</sup> /Mn <sup>2+</sup> dependent 1K                                 |
| P63151 | PPP2R2A | protein phosphatase 2 regulatory subunit Balpha                                                      |
| Q16537 | PPP2R5E | protein phosphatase 2 regulatory subunit B'epsilon                                                   |

|  |        |          |                                                                        |
|--|--------|----------|------------------------------------------------------------------------|
|  | P51817 | PRKX     | protein kinase X-linked                                                |
|  | P11464 | PSG1     | pregnancy specific beta-1-glycoprotein 1                               |
|  | Q96BW5 | PTER     | phosphotriesterase related                                             |
|  | P26045 | PTPN3    | protein tyrosine phosphatase, non-receptor type 3                      |
|  | Q96AH8 | RABEP1   | rabaptin, RAB GTPase binding effector protein 1                        |
|  | Q2PPJ7 | RALGAPA2 | Ral GTPase activating protein catalytic alpha subunit 2                |
|  | Q86X27 | RALGPS2  | Ral GEF with PH domain and SH3 binding motif 2                         |
|  | P10114 | RAP2A    | RAP2A, member of RAS oncogene family                                   |
|  | P06400 | RB1      | RB transcriptional corepressor 1                                       |
|  | Q06330 | RBPJ     | recombination signal binding protein for immunoglobulin kappa J region |
|  | P48380 | RFX3     | regulatory factor X3                                                   |
|  | Q5EBL4 | RILPL1   | Rab interacting lysosomal protein like 1                               |
|  | O60942 | RNGTT    | RNA guanylyltransferase and 5'-phosphatase                             |
|  | Q01973 | ROCK2    | Rho associated coiled-coil containing protein kinase 2                 |
|  | Q9H6T3 | RPAP3    | RNA polymerase II associated protein 3                                 |
|  | Q01196 | RUNX1    | runt related transcription factor 1                                    |
|  | Q99590 | SCAF11   | SR-related CTD associated factor 11                                    |
|  | O00767 | SCD      | stearoyl-CoA desaturase                                                |
|  | P34741 | SDC2     | syndecan 2                                                             |
|  | Q96JE7 | SEC16B   | SEC16 homolog B, endoplasmic reticulum export factor                   |
|  | Q99442 | SEC62    | SEC62 homolog, preprotein translocation factor                         |
|  | Q14563 | SEMA3A   | semaphorin 3A                                                          |
|  | P07093 | SERPINE2 | serpin family E member 2                                               |
|  | P58005 | SESN3    | sestrin 3                                                              |
|  | Q86VW0 | SESTD1   | SEC14 and spectrin domain containing 1                                 |
|  | Q9BYW2 | SETD2    | SET domain containing 2, histone lysine methyltransferase              |
|  | Q8IWX5 | SGPP2    | sphingosine-1-phosphate phosphatase 2                                  |
|  | Q9Y371 | SH3GLB1  | SH3 domain containing GRB2 like, endophilin B1                         |

|  |        |          |                                                        |
|--|--------|----------|--------------------------------------------------------|
|  | Q9NP50 | SINHCAF  | SIN3-HDAC complex associated factor                    |
|  | Q9UHW9 | SLC12A6  | solute carrier family 12 member 6                      |
|  | Q9UI40 | SLC24A2  | solute carrier family 24 member 2                      |
|  | Q9ULF5 | SLC39A10 | solute carrier family 39 member 10                     |
|  | Q9Y6M7 | SLC4A7   | solute carrier family 4 member 7                       |
|  | P30825 | SLC7A1   | solute carrier family 7 member 1                       |
|  | Q8TCU3 | SLC7A13  | solute carrier family 7 member 13                      |
|  | Q9H5Y7 | SLITRK6  | SLIT and NTRK like family member 6                     |
|  | P0C7L1 | SPINK8   | serine peptidase inhibitor, Kazal type 8 (putative)    |
|  | O95793 | STAU1    | staufen double-stranded RNA binding protein 1          |
|  | Q9ULQ0 | STRIP2   | striatin interacting protein 2                         |
|  | Q9H2B2 | SYT4     | synaptotagmin 4                                        |
|  | Q9NYJ8 | TAB2     | TGF-beta activated kinase 1 (MAP3K7) binding protein 2 |
|  | Q7L7X3 | TAOK1    | TAO kinase 1                                           |
|  | Q8WVE7 | TMEM170A | transmembrane protein 170A                             |
|  | Q0P6H9 | TMEM62   | transmembrane protein 62                               |
|  | Q9NS68 | TNFRSF19 | TNF receptor superfamily member 19                     |
|  | P50591 | TNFSF10  | TNF superfamily member 10                              |
|  | O94811 | TPPP     | tubulin polymerization promoting protein               |
|  | P62995 | TRA2B    | transformer 2 beta homolog                             |
|  | Q8TDR0 | TRAF3IP1 | TRAF3 interacting protein 1                            |
|  | Q9C040 | TRIM2    | tripartite motif containing 2                          |
|  | Q6ZMU5 | TRIM72   | tripartite motif containing 72                         |
|  | Q15643 | TRIP11   | thyroid hormone receptor interactor 11                 |
|  | Q8NG11 | TSPAN14  | tetraspanin 14                                         |
|  | Q9Y385 | UBE2J1   | ubiquitin conjugating enzyme E2 J1                     |
|  | Q8N2C7 | UNC80    | unc-80 homolog, NALCN channel complex subunit          |
|  | Q96BW1 | UPRT     | uracil phosphoribosyltransferase homolog               |
|  | P14927 | UQCRB    | ubiquinol-cytochrome c reductase binding protein       |

|            |                                       |        |              |                                                                                                                                                                                                                             |
|------------|---------------------------------------|--------|--------------|-----------------------------------------------------------------------------------------------------------------------------------------------------------------------------------------------------------------------------|
| TargetScan |                                       | Q86T82 | USP37        | ubiquitin specific peptidase 37                                                                                                                                                                                             |
|            |                                       | Q8IUA0 | WFDC8        | WAP four-disulfide core domain 8                                                                                                                                                                                            |
|            |                                       | Q9H4A3 | WNK1         | WNK lysine deficient protein kinase 1                                                                                                                                                                                       |
|            |                                       | Q9HC78 | ZBTB20       | zinc finger and BTB domain containing 20                                                                                                                                                                                    |
|            |                                       | Q9P1Z0 | ZBTB4        | zinc finger and BTB domain containing 4                                                                                                                                                                                     |
|            |                                       | O43298 | ZBTB43       | zinc finger and BTB domain containing 43                                                                                                                                                                                    |
|            |                                       | Q96EF9 | ZHX1-C8orf76 | ZHX1-C8orf76 readthrough                                                                                                                                                                                                    |
|            |                                       | O75362 | ZNF217       | zinc finger protein 217                                                                                                                                                                                                     |
|            |                                       | Q96SE7 | ZNF347       | zinc finger protein 347                                                                                                                                                                                                     |
|            |                                       | Q8NDX6 | ZNF740       | zinc finger protein 740                                                                                                                                                                                                     |
|            |                                       | A8MX4  | ZNF99        | zinc finger protein 99                                                                                                                                                                                                      |
|            |                                       | Q6PCB6 | ABHD17C      | Alpha/beta hydrolase domain-containing protein 17C (Abhydrolase domain-containing protein 17C) (EC 3.1.2.22)                                                                                                                |
|            | miR-27a-3p<br>Upregulated 24<br>hours | P62736 | ACTA2        | Actin, aortic smooth muscle (Alpha-actin-2) (Cell growth-inhibiting gene 46 protein) [Cleaved into: Actin, aortic smooth muscle, intermediate form]                                                                         |
|            |                                       | P29275 | ADORA2B      | Adenosine receptor A2b                                                                                                                                                                                                      |
|            |                                       | Q9UHB7 | AFF4         | AF4/FMR2 family member 4 (ALL1-fused gene from chromosome 5q31 protein) (Protein AF-5q31) (Major CDK9 elongation factor-associated protein)                                                                                 |
|            |                                       | Q9H9L7 | AKIRIN1      | Akirin-1                                                                                                                                                                                                                    |
|            |                                       | P61204 | ARF3         | ADP-ribosylation factor 3                                                                                                                                                                                                   |
|            |                                       | P48201 | ATP5G3       | ATP synthase F(0) complex subunit B1, mitochondrial (ATP synthase peripheral stalk-membrane subunit b) (ATP synthase proton-transporting mitochondrial F(0) complex subunit B1) (ATP synthase subunit b) (ATPase subunit b) |
|            |                                       | Q9NPZ5 | B3GAT2       | Galactosylgalactosylxylosylprotein 3-beta-glucuronosyltransferase 2 (EC 2.4.1.135) (Beta-1,3-glucuronosyltransferase 2) (GlcAT-D) (UDP-                                                                                     |

|        |          |                                                                                                                                                                                                                                                                                                                                                                                                                                                    |
|--------|----------|----------------------------------------------------------------------------------------------------------------------------------------------------------------------------------------------------------------------------------------------------------------------------------------------------------------------------------------------------------------------------------------------------------------------------------------------------|
|        |          | glucuronosyltransferase S) (GlcAT-S) (Glucuronosyltransferase S)                                                                                                                                                                                                                                                                                                                                                                                   |
| Q8NFL0 | B3GNT7   | UDP-GlcNAc:betaGal beta-1,3-N-acetylglucosaminyltransferase 7 (BGnT-7) (Beta-1,3-Gn-T7) (Beta-1,3-N-acetylglucosaminyltransferase 7) (Beta3Gn-T7) (EC 2.4.1.-)                                                                                                                                                                                                                                                                                     |
| O60512 | B4GALT3  | Beta-1,4-galactosyltransferase 3 (Beta-1,4-GalTase 3) (Beta4Gal-T3) (b4Gal-T3) (EC 2.4.1.-) (Beta-N-acetylglucosaminylglycolipid beta-1,4-galactosyltransferase) (Beta-N-acetylglucosaminylglycopeptide beta-1,4-galactosyltransferase) (EC 2.4.1.38) (N-acetyllactosamine synthase) (EC 2.4.1.90) (Nal synthase) (UDP-Gal:beta-GlcNAc beta-1,4-galactosyltransferase 3) (UDP-galactose:beta-N-acetylglucosamine beta-1,4-galactosyltransferase 3) |
| P20749 | BCL3     | B-cell lymphoma 3 protein (BCL-3) (Proto-oncogene BCL3)                                                                                                                                                                                                                                                                                                                                                                                            |
| P78543 | BTG2     | Protein BTG2 (BTG family member 2) (NGF-inducible anti-proliferative protein PC3)                                                                                                                                                                                                                                                                                                                                                                  |
| Q9NS85 | CA10     | Carbonic anhydrase-related protein 10 (Carbonic anhydrase-related protein X) (CA-RP X) (CARP X) (Cerebral protein 15)                                                                                                                                                                                                                                                                                                                              |
| Q8IZS8 | CACNA2D3 | Voltage-dependent calcium channel subunit alpha-2/delta-3                                                                                                                                                                                                                                                                                                                                                                                          |
| P51959 | CCNG1    | G1/S-specific cyclin-D1 (B-cell lymphoma 1 protein) (BCL-1) (BCL-1 oncogene) (PRAD1 oncogene)                                                                                                                                                                                                                                                                                                                                                      |
| Q9H305 | CDIP1    | Cell death-inducing p53-target protein 1                                                                                                                                                                                                                                                                                                                                                                                                           |
| Q92903 | CDS1     | Phosphatidate cytidyltransferase 1                                                                                                                                                                                                                                                                                                                                                                                                                 |
| Q07065 | CKAP4    | Cytoskeleton-associated protein 4                                                                                                                                                                                                                                                                                                                                                                                                                  |
| Q16740 | CLPP     | ATP-dependent Clp protease proteolytic subunit, mitochondrial                                                                                                                                                                                                                                                                                                                                                                                      |
| Q15417 | CNN3     | Calponin-3                                                                                                                                                                                                                                                                                                                                                                                                                                         |
| Q9UIV1 | CNOT7    | CCR4-NOT transcription complex subunit 7                                                                                                                                                                                                                                                                                                                                                                                                           |

|  |        |          |                                                                                                                                                                                                                                       |
|--|--------|----------|---------------------------------------------------------------------------------------------------------------------------------------------------------------------------------------------------------------------------------------|
|  | Q8NE35 | CPEB3    | Cytoplasmic polyadenylation element-binding protein 3                                                                                                                                                                                 |
|  | Q8IUR6 | CREBRF   | CREB3 regulatory factor                                                                                                                                                                                                               |
|  | Q92564 | DCUN1D4  | DCN1-like protein 4                                                                                                                                                                                                                   |
|  | D3DT02 | EPB41L4A | Erythrocyte membrane protein band 4.1 like 4A, isoform CRA_a                                                                                                                                                                          |
|  | O95677 | EYA4     | Eyes absent homolog 4                                                                                                                                                                                                                 |
|  | Q5BKY9 | FAM133B  | Protein FAM133B                                                                                                                                                                                                                       |
|  | Q8NB25 | FAM184A  | Protein FAM184A                                                                                                                                                                                                                       |
|  | Q96PV7 | FAM193B  | Protein FAM193B                                                                                                                                                                                                                       |
|  | Q96KN1 | FAM84B   | Protein LRATD2                                                                                                                                                                                                                        |
|  | Q9UK96 | FBXO10   | F-box only protein 10                                                                                                                                                                                                                 |
|  | Q969H0 | FBXW7    | F-box/WD repeat-containing protein 7 (Archipelago homolog) (hAgo) (F-box and WD-40 domain-containing protein 7) (F-box protein FBX30) (SEL-10) (hCdc4)                                                                                |
|  | Q9NZU0 | FLRT3    | Leucine-rich repeat transmembrane protein FLRT3 (Fibronectin-like domain-containing leucine-rich transmembrane protein 3)                                                                                                             |
|  | Q13480 | GAB1     | GRB2-associated-binding protein 1 (GRB2-associated binder 1) (Growth factor receptor bound protein 2-associated protein 1)                                                                                                            |
|  | Q86SF2 | GALNT7   | N-acetylgalactosaminyltransferase 7 (EC 2.4.1.41) (Polypeptide GalNAc transferase 7) (GalNAc-T7) (pp-GaNTase 7) (Protein-UDP acetylgalactosaminyltransferase 7) (UDP-GalNAc:polypeptide N-acetylgalactosaminyltransferase 7)          |
|  | O43716 | GATC     | Glutamyl-tRNA(Gln) amidotransferase subunit C, mitochondrial (Glu-AdT subunit C) (EC 6.3.5.-) (Protein 15E1.2)                                                                                                                        |
|  | Q8IWJ2 | GCC2     | GRIP and coiled-coil domain-containing protein 2 (185 kDa Golgi coiled-coil protein) (GCC185) (CLL-associated antigen KW-11) (CTCL tumor antigen se1-1) (Ran-binding protein 2-like 4) (RanBP2L4) (Renal carcinoma antigen NY-REN-53) |



|  |  |        |          |                                                                                                                                                                                                                                      |
|--|--|--------|----------|--------------------------------------------------------------------------------------------------------------------------------------------------------------------------------------------------------------------------------------|
|  |  | O94808 | GFPT2    | Glutamine--fructose-6-phosphate aminotransferase [isomerizing] 2 (EC 2.6.1.16) (D-fructose-6-phosphate amidotransferase 2) (Glutamine:fructose-6-phosphate amidotransferase 2) (GFAT 2) (GFAT2) (Hexosephosphate aminotransferase 2) |
|  |  | P15586 | GNS      | N-acetylglucosamine-6-sulfatase (EC 3.1.6.14) (Glucosamine-6-sulfatase) (G6S)                                                                                                                                                        |
|  |  | Q8NBj4 | GOLM1    | Golgi membrane protein 1 (Golgi membrane protein GP73) (Golgi phosphoprotein 2)                                                                                                                                                      |
|  |  | O14653 | GOSR2    | Golgi SNAP receptor complex member 2 (27 kDa Golgi SNARE protein) (Membrin)                                                                                                                                                          |
|  |  | Q9HCL2 | GPAM     | Glycerol-3-phosphate acyltransferase 1, mitochondrial (GPAT-1) (EC 2.3.1.15)                                                                                                                                                         |
|  |  | Q9NWQ4 | GPATCH2L | G patch domain-containing protein 2-like                                                                                                                                                                                             |
|  |  | P62993 | GRB2     | Growth factor receptor-bound protein 2 (Adapter protein GRB2) (Protein Ash) (SH2/SH3 adapter GRB2)                                                                                                                                   |
|  |  | O15399 | GRIN2D   | Glutamate receptor ionotropic, NMDA 2D (GluN2D) (EB11) (Glutamate [NMDA] receptor subunit epsilon-4) (N-methyl D-aspartate receptor subtype 2D) (NMDAR2D) (NR2D)                                                                     |
|  |  | Q4G148 | GXYLT1   | Glucoside xylosyltransferase 1 (EC 2.4.2.42) (Glycosyltransferase 8 domain-containing protein 3)                                                                                                                                     |
|  |  | Q99075 | HBEGF    | Proheparin-binding EGF-like growth factor [Cleaved into: Heparin-binding EGF-like growth factor (HB-EGF) (HBEGF) (Diphtheria toxin receptor) (DT-R)]                                                                                 |
|  |  | P31260 | HOXA10   | Homeobox protein Hox-A10 (Homeobox protein Hox-1.8) (Homeobox protein Hox-1H) (PL)                                                                                                                                                   |
|  |  | P20719 | HOXA5    | Homeobox protein Hox-A5 (Homeobox protein Hox-1C)                                                                                                                                                                                    |
|  |  | P17481 | HOXB8    | Homeobox protein Hox-B8 (Homeobox protein Hox-2.4) (Homeobox protein Hox-2D)                                                                                                                                                         |

|  |  |        |          |                                                                                                                                                                                                                                                                                                                                           |
|--|--|--------|----------|-------------------------------------------------------------------------------------------------------------------------------------------------------------------------------------------------------------------------------------------------------------------------------------------------------------------------------------------|
|  |  | Q02535 | ID3      | DNA-binding protein inhibitor ID-3 (Class B basic helix-loop-helix protein 25) (bHLHb25) (Helix-loop-helix protein HEIR-1) (ID-like protein inhibitor HLH 1R21) (Inhibitor of DNA binding 3) (Inhibitor of differentiation 3)                                                                                                             |
|  |  | Q8WYH8 | ING5     | Inhibitor of growth protein 5 (p28ING5)                                                                                                                                                                                                                                                                                                   |
|  |  | Q9H8E8 | KAT14    | Potassium voltage-gated channel subfamily A member 4 (HPCN2) (Voltage-gated K(+) channel HuKII) (Voltage-gated potassium channel HBK4) (Voltage-gated potassium channel HK1) (Voltage-gated potassium channel subunit Kv1.4)                                                                                                              |
|  |  | P22459 | KCNA4    | Inward rectifier potassium channel 2 (Cardiac inward rectifier potassium channel) (Inward rectifier K(+) channel Kir2.1) (IRK-1) (hIRK1) (Potassium channel, inwardly rectifying subfamily J member 2)                                                                                                                                    |
|  |  | Q2LD37 | KIAA1109 | Chromosome-associated kinesin KIF4A (Chromokinesin-A)                                                                                                                                                                                                                                                                                     |
|  |  | P21583 | KITLG    | GTPase KRas (K-Ras 2) (Ki-Ras) (c-K-ras) (c-Ki-ras) [Cleaved into: GTPase KRas, N-terminally processed]                                                                                                                                                                                                                                   |
|  |  | P53667 | LIMK1    | LIM domain kinase 1 (LIMK-1) (EC 2.7.11.1)                                                                                                                                                                                                                                                                                                |
|  |  | Q17RB8 | LONRF1   | LON peptidase N-terminal domain and RING finger protein 1 (RING finger protein 191)                                                                                                                                                                                                                                                       |
|  |  | Q16539 | MAPK14   | Mitogen-activated protein kinase 14 (MAP kinase 14) (MAPK 14) (EC 2.7.11.24) (Cytokine suppressive anti-inflammatory drug-binding protein) (CSAID-binding protein) (CSBP) (MAP kinase MXI2) (MAX-interacting protein 2) (Mitogen-activated protein kinase p38 alpha) (MAP kinase p38 alpha) (Stress-activated protein kinase 2a) (SAPK2a) |
|  |  | O15232 | MATN3    | Matrilin-3                                                                                                                                                                                                                                                                                                                                |
|  |  | Q8NA29 | MFSD2A   | Sodium-dependent lysophosphatidylcholine symporter 1 (NLS1) (Sodium-dependent LPC symporter 1) (Major facilitator superfamily domain-containing protein 2A)                                                                                                                                                                               |

|  |        |         |                                                                                                                                                                                                                                                                       |
|--|--------|---------|-----------------------------------------------------------------------------------------------------------------------------------------------------------------------------------------------------------------------------------------------------------------------|
|  | Q7Z3K6 | MIER3   | Mesoderm induction early response protein 3 (Mi-er3)                                                                                                                                                                                                                  |
|  | Q15546 | MMD     | Monocyte to macrophage differentiation factor (Progestin and adipoQ receptor family member 11) (Progestin and adipoQ receptor family member XI)                                                                                                                       |
|  | Q96AH0 | NABP1   | SOSS complex subunit B2 (Nucleic acid-binding protein 1) (Oligonucleotide/oligosaccharide-binding fold-containing protein 2A) (Sensor of single-strand DNA complex subunit B2) (Sensor of ssDNA subunit B2) (SOSS-B2) (Single-stranded DNA-binding protein 2) (hSSB2) |
|  | Q8NI08 | NCOA7   | Nuclear receptor coactivator 7 (140 kDa estrogen receptor-associated protein) (Estrogen nuclear receptor coactivator 1)                                                                                                                                               |
|  | P46934 | NEDD4   | E3 ubiquitin-protein ligase NEDD4 (EC 2.3.2.26) (Cell proliferation-inducing gene 53 protein) (HECT-type E3 ubiquitin transferase NEDD4) (Neural precursor cell expressed developmentally down-regulated protein 4) (NEDD-4)                                          |
|  | Q8TDF5 | NETO1   | Neuropilin and tolloid-like protein 1                                                                                                                                                                                                                                 |
|  | Q14991 | NGFRAP1 | NGFRAP1                                                                                                                                                                                                                                                               |
|  | P51513 | NOVA1   | RNA-binding protein Nova-1                                                                                                                                                                                                                                            |
|  | P24468 | NR2F2   | COUP transcription factor 2                                                                                                                                                                                                                                           |
|  | P10588 | NR2F6   | Nuclear receptor subfamily 2 group F member 6 (V-erbA-related protein 2) (EAR-2)                                                                                                                                                                                      |
|  | O60462 | NRP2    | Neuropilin-2 (Vascular endothelial cell growth factor 165 receptor 2)                                                                                                                                                                                                 |
|  | O95948 | ONECUT2 | One cut domain family member 2 (Hepatocyte nuclear factor 6-beta) (HNF-6-beta) (One cut homeobox 2) (Transcription factor ONECUT-2) (OC-2)                                                                                                                            |
|  | Q9BPZ3 | PAIP2   | Polyadenylate-binding protein-interacting protein 2 (PABP-interacting protein 2) (PAIP-2) (Poly(A)-binding protein-interacting protein 2)                                                                                                                             |

|        |         |                                                              |
|--------|---------|--------------------------------------------------------------|
| Q8TE04 | PANK1   | Pantothenate kinase 1                                        |
| Q9HC56 | PCDH9   | Protocadherin-9                                              |
| Q9NP56 | PDE7B   | cAMP-specific 3',5'-cyclic phosphodiesterase 7B              |
| Q14554 | PDIA5   | Protein disulfide-isomerase A5                               |
| Q9NTI5 | PDS5B   | Sister chromatid cohesion protein PDS5 homolog B             |
| P35232 | PHB     | Prohibitin                                                   |
| P61925 | PKIA    | cAMP-dependent protein kinase inhibitor alpha                |
| Q9UPR0 | PLCL2   | Inactive phospholipase C-like protein 2                      |
| Q9ULM0 | PLEKHH1 | Pleckstrin homology domain-containing family H member 1      |
| Q9NYY3 | PLK2    | Serine/threonine-protein kinase PLK2                         |
| Q8NBL1 | POGLUT1 | Protein O-glucosyltransferase 1                              |
| P37231 | PPARG   | Peroxisome proliferator-activated receptor gamma             |
| P30405 | PPIF    | Peptidyl-prolyl cis-trans isomerase F, mitochondrial         |
| Q9NY27 | PPP4R2  | Serine/threonine-protein phosphatase 4 regulatory subunit 2  |
| P51817 | PRKX    | cAMP-dependent protein kinase catalytic subunit PRKX         |
| P79522 | PRR3    | Proline-rich protein 3                                       |
| Q8WXF1 | PSPC1   | Paraspeckle component 1                                      |
| P49023 | PXN     | Paxillin                                                     |
| Q9UJF2 | RASAL2  | Ras GTPase-activating protein nGAP                           |
| Q6ZRY4 | RBPM52  | RNA-binding protein with multiple splicing 2                 |
| Q14206 | RCAN2   | Calcipressin-2                                               |
| P78509 | RELN    | Reelin                                                       |
| Q99666 | RGPD5   | RANBP2-like and GRIP domain-containing protein 5/6           |
| Q9UGC6 | RGS17   | Regulator of G-protein signaling 17                          |
| Q9Y4F9 | RIPOR2  | Rho family-interacting cell polarization regulator 2         |
| Q8WU17 | RNF139  | E3 ubiquitin-protein ligase RNF139                           |
| Q01973 | ROR1    | Inactive tyrosine-protein kinase transmembrane receptor ROR1 |
| O75582 | RPS6KA5 | Ribosomal protein S6 kinase alpha-5                          |
| Q92766 | RREB1   | Ras-responsive element-binding protein 1                     |

|  |        |            |                                                                                                                                                                                                   |
|--|--------|------------|---------------------------------------------------------------------------------------------------------------------------------------------------------------------------------------------------|
|  | Q01196 | RUNX1      | Runt-related transcription factor 1                                                                                                                                                               |
|  | Q96IW7 | SEC22A     | Vesicle-trafficking protein SEC22a                                                                                                                                                                |
|  | Q96NB2 | SFXN2      | Sideroflexin-2                                                                                                                                                                                    |
|  | Q8TF71 | SLC16A10   | Monocarboxylate transporter 10                                                                                                                                                                    |
|  | Q8N1S5 | SLC39A11   | Zinc transporter ZIP11                                                                                                                                                                            |
|  | P30531 | SLC6A1     | Sodium- and chloride-dependent GABA transporter 1                                                                                                                                                 |
|  | Q96PX8 | SLITRK1    | SLIT and NTRK-like protein 1                                                                                                                                                                      |
|  | O15198 | SMAD9      | Mothers against decapentaplegic homolog 9                                                                                                                                                         |
|  | P60880 | SNAP25     | Synaptosomal-associated protein 25                                                                                                                                                                |
|  | Q9UMY4 | SNX12      | Sorting nexin-12                                                                                                                                                                                  |
|  | O43597 | SPRY2      | Protein sprouty homolog 2                                                                                                                                                                         |
|  | P12931 | SRC        | Proto-oncogene tyrosine-protein kinase Src (EC 2.7.10.2) (Proto-oncogene c-Src) (pp60c-src) (p60-Src)                                                                                             |
|  | Q8NDV1 | ST6GALNAC3 | Alpha-N-acetylgalactosaminide alpha-2,6-sialyltransferase 5 (EC 2.4.99.-) (GD1 alpha synthase) (GalNAc alpha-2,6-sialyltransferase V) (ST6GalNAc V) (ST6GalNAcV) (Sialyltransferase 7E) (SIAT7-E) |
|  | Q8WWQ8 | STAB2      | Stabilin-2                                                                                                                                                                                        |
|  | Q7Z422 | SZRD1      | SUZ domain-containing protein 1                                                                                                                                                                   |
|  | Q96FV9 | THOC1      | THO complex subunit 1 (Tho1) (Nuclear matrix protein p84) (p84N5) (hTREX84)                                                                                                                       |
|  | O94876 | TMCC1      | Transmembrane and coiled-coil domains protein 1                                                                                                                                                   |
|  | P63313 | TMSB10     | Thymosin beta-10                                                                                                                                                                                  |
|  | Q92973 | TNPO1      | Transportin-1 (Importin beta-2) (Karyopherin beta-2) (M9 region interaction protein) (MIP)                                                                                                        |
|  | O15417 | TNRC18     | Trinucleotide repeat-containing gene 18 protein (Long CAG trinucleotide repeat-containing gene 79 protein)                                                                                        |

|  |  |        |        |                                                                                                                                                                                                                                                                                                                                                                         |
|--|--|--------|--------|-------------------------------------------------------------------------------------------------------------------------------------------------------------------------------------------------------------------------------------------------------------------------------------------------------------------------------------------------------------------------|
|  |  | P36406 | TRIM23 | E3 ubiquitin-protein ligase TRIM23 (EC 2.3.2.27) (ADP-ribosylation factor domain-containing protein 1) (GTP-binding protein ARD-1) (RING finger protein 46) (RING-type E3 ubiquitin transferase TRIM23) (Tripartite motif-containing protein 23)                                                                                                                        |
|  |  | Q16222 | UAP1   | UDP-N-acetylhexosamine pyrophosphorylase (Antigen X) (AGX) (Sperm-associated antigen 2) [Includes: UDP-N-acetylgalactosamine pyrophosphorylase (EC 2.7.7.83) (AGX-1); UDP-N-acetylglucosamine pyrophosphorylase (EC 2.7.7.23) (AGX-2)]                                                                                                                                  |
|  |  | P51668 | UBE2D1 | Ubiquitin-conjugating enzyme E2 D1 (EC 2.3.2.23) ((E3-independent) E2 ubiquitin-conjugating enzyme D1) (EC 2.3.2.24) (E2 ubiquitin-conjugating enzyme D1) (Stimulator of Fe transport) (SFT) (UBC4/5 homolog) (UbcH5) (Ubiquitin carrier protein D1) (Ubiquitin-conjugating enzyme E2(17)KB 1) (Ubiquitin-conjugating enzyme E2-17 kDa 1) (Ubiquitin-protein ligase D1) |
|  |  | Q5JXB2 | UBE2NL | Putative ubiquitin-conjugating enzyme E2 N-like (Epididymis tissue protein Li 174)                                                                                                                                                                                                                                                                                      |
|  |  | Q13404 | UBE2V1 | Ubiquitin-conjugating enzyme E2 variant 1 (UEV-1) (CROC-1) (TRAF6-regulated IKK activator 1 beta Uev1A)                                                                                                                                                                                                                                                                 |
|  |  | Q9H9P5 | UNKL   | Putative E3 ubiquitin-protein ligase UNKL (EC 2.3.2.-) (RING finger protein unkempt-like) (Zinc finger CCCH domain-containing protein 5-like)                                                                                                                                                                                                                           |
|  |  | P62068 | USP46  | Ubiquitin carboxyl-terminal hydrolase 46 (EC 3.4.19.12) (Deubiquitinating enzyme 46) (Ubiquitin thioesterase 46) (Ubiquitin-specific-processing protease 46)                                                                                                                                                                                                            |
|  |  | P49767 | VEGFC  | Vascular endothelial growth factor C (VEGF-C) (Flt4 ligand) (Flt4-L) (Vascular endothelial growth factor-related protein) (VRP)                                                                                                                                                                                                                                         |

|       |  |        |          |                                                                        |
|-------|--|--------|----------|------------------------------------------------------------------------|
|       |  | B2RUY7 | VWC2L    | von Willebrand factor C domain-containing protein 2-like (Brorin-like) |
|       |  | Q8NCN2 | ZBTB34   | Zinc finger and BTB domain-containing protein 34                       |
| miRDB |  | Q5TC79 | ZBTB37   | Zinc finger and BTB domain-containing protein 37                       |
|       |  | Q9H6B1 | ZNF385D  | Zinc finger protein 385D (Zinc finger protein 659)                     |
|       |  | Q9ULD9 | ZNF608   | Zinc finger protein 608 (Renal carcinoma antigen NY-REN-36)            |
|       |  | O95477 | ABCA1    | ATP binding cassette subfamily A member 1                              |
|       |  | Q9NP78 | ABCB9    | ATP binding cassette subfamily B member 9                              |
|       |  | Q5VST6 | ABHD17B  | abhydrolase domain containing 17B                                      |
|       |  | Q6PCB6 | ABHD17C  | abhydrolase domain containing 17C                                      |
|       |  | Q9BV23 | ABHD6    | abhydrolase domain containing 6                                        |
|       |  | Q9NYB9 | ABL2     | ABL proto-oncogene 2, non-receptor tyrosine kinase                     |
|       |  | P62736 | ACTA2    | actin, alpha 2, smooth muscle, aorta                                   |
|       |  | Q8NER5 | ACVR1C   | activin A receptor type 1C                                             |
|       |  | Q9H324 | ADAMTS10 | ADAM metalloproteinase with thrombospondin type 1 motif 10             |
|       |  | Q8N6G6 | ADAMTSL1 | ADAMTS like 1                                                          |
|       |  | P82987 | ADAMTSL3 | ADAMTS like 3                                                          |
|       |  | O43306 | ADCY6    | adenylate cyclase 6                                                    |
|       |  | Q8IWK6 | ADGRA3   | adhesion G protein-coupled receptor A3                                 |
|       |  | P29275 | ADORA2B  | adenosine A2b receptor                                                 |
|       |  | Q8N556 | AFAP1    | actin filament associated protein 1                                    |
|       |  | Q9UHB7 | AFF4     | AF4/FMR2 family member 4                                               |
|       |  | P52594 | AGFG1    | ArfGAP with FG repeats 1                                               |
|       |  | O00468 | AGRN     | agrin                                                                  |
|       |  | Q719I0 | AHSA2P   | activator of HSP90 ATPase homolog 2, pseudogene                        |
|       |  | P27144 | AK4      | adenylate kinase 4                                                     |
|       |  | Q9H9L7 | AKIRIN1  | akirin 1                                                               |
|       |  | Q53H80 | AKIRIN2  | akirin 2                                                               |
|       |  | P51649 | ALDH5A1  | aldehyde dehydrogenase 5 family member A1                              |

|  |        |          |                                                                     |
|--|--------|----------|---------------------------------------------------------------------|
|  | Q9H6U8 | ALG9     | ALG9, alpha-1,2-mannosyltransferase                                 |
|  | P17707 | AMD1     | adenosylmethionine decarboxylase 1                                  |
|  | Q01432 | AMPD3    | adenosine monophosphate deaminase 3                                 |
|  | P16157 | ANK1     | ankyrin 1                                                           |
|  | Q92625 | ANKS1A   | ankyrin repeat and sterile alpha motif domain containing 1A         |
|  | Q6UXV4 | APOOL    | apolipoprotein O like                                               |
|  | Q92624 | APPBP2   | amyloid beta precursor protein binding protein 2                    |
|  | Q8NBQ7 | AQP11    | aquaporin 11                                                        |
|  | P61204 | ARF3     | ADP ribosylation factor 3                                           |
|  | Q9Y6D6 | ARFGEF1  | ADP ribosylation factor guanine nucleotide exchange factor 1        |
|  | A7KAX9 | ARHGAP32 | Rho GTPase activating protein 32                                    |
|  | Q96DR7 | ARHGEF26 | Rho guanine nucleotide exchange factor 26                           |
|  | Q14155 | ARHGEF7  | Rho guanine nucleotide exchange factor 7                            |
|  | P56559 | ARL4C    | ADP ribosylation factor like GTPase 4C                              |
|  | Q8IUR7 | ARMC8    | armadillo repeat containing 8                                       |
|  | Q8NCT1 | ARRDC4   | arrestin domain containing 4                                        |
|  | Q96QS3 | ARX      | aristaless related homeobox                                         |
|  | Q13510 | ASAH1    | N-acylsphingosine amidohydrolase 1                                  |
|  | Q9ULH1 | ASPH     | aspartate beta-hydroxylase                                          |
|  | Q8NBU5 | ATAD2B   | ATPase family, AAA domain containing 2B                             |
|  | Q8NB49 | ATP11C   | ATPase phospholipid transporting 11C                                |
|  | P50993 | ATP1A2   | ATPase Na <sup>+</sup> /K <sup>+</sup> transporting subunit alpha 2 |
|  | P20020 | ATP2B1   | ATPase plasma membrane Ca <sup>2+</sup> transporting 1              |
|  | Q8NFL0 | B3GNT7   | UDP-GlcNAc:betaGal beta-1,3-N-acetylglucosaminyltransferase 7       |
|  | O60512 | B4GALT3  | beta-1,4-galactosyltransferase 3                                    |
|  | Q6ZU67 | BEND4    | BEN domain containing 4                                             |
|  | O76090 | BEST1    | bestrophin 1                                                        |
|  | Q00994 | BEX3     | brain expressed X-linked 3                                          |



|        |           |                                                               |
|--------|-----------|---------------------------------------------------------------|
| Q9H694 | BICC1     | BicC family RNA binding protein 1                             |
| P12645 | BMP3      | bone morphogenetic protein 3                                  |
| Q12982 | BNIP2     | BCL2 interacting protein 2                                    |
| Q12983 | BNIP3     | BCL2 interacting protein 3                                    |
| Q9ULD4 | BRPF3     | bromodomain and PHD finger containing 3                       |
| Q6RI45 | BRWD3     | bromodomain and WD repeat domain containing 3                 |
| P62324 | BTG1      | BTG anti-proliferation factor 1                               |
| P78543 | BTG2      | BTG anti-proliferation factor 2                               |
| O00193 | C11orf58  | chromosome 11 open reading frame 58                           |
| Q8N6N3 | C1orf52   | chromosome 1 open reading frame 52                            |
| Q5TEA3 | C20orf194 | chromosome 20 open reading frame 194                          |
| Q9Y426 | C2CD2     | C2 calcium dependent domain containing 2                      |
| Q9NS85 | CA10      | carbonic anhydrase 10                                         |
| Q8IZS8 | CACNA2D3  | calcium voltage-gated channel auxiliary subunit alpha2delta 3 |
| Q9Y698 | CACNG2    | calcium voltage-gated channel auxiliary subunit gamma 2       |
| Q05682 | CALD1     | caldesmon 1                                                   |
| Q8IU85 | CAMK1D    | calcium/calmodulin dependent protein kinase ID                |
| Q9Y6Y1 | CAMTA1    | calmodulin binding transcription activator 1                  |
| Q86VP6 | CAND1     | cullin associated and neddylation dissociated 1               |
| O75808 | CAPN15    | calpain 15                                                    |
| O75081 | CBFA2T3   | CBFA2/RUNX1 translocation partner 3                           |
| Q13191 | CBLB      | Cbl proto-oncogene B                                          |
| Q9BUN5 | CCDC28B   | coiled-coil domain containing 28B                             |
| Q9BSQ5 | CCM2      | CCM2 scaffold protein                                         |
| O95388 | CCN4      | cellular communication network factor 4                       |
| P24863 | CCNC      | cyclin C                                                      |
| P51959 | CCNG1     | cyclin G1                                                     |
| Q5T5M9 | CCNJ      | cyclin J                                                      |
| O75909 | CCNK      | cyclin K                                                      |

|        |          |                                             |
|--------|----------|---------------------------------------------|
| O60583 | CCNT2    | cyclin T2                                   |
| Q8ND76 | CCNY     | cyclin Y                                    |
| Q9UKI2 | CDC42EP3 | CDC42 effector protein 3                    |
| P55287 | CDH11    | cadherin 11                                 |
| P33151 | CDH5     | cadherin 5                                  |
| Q9H305 | CDIP1    | cell death inducing p53 target 1            |
| Q07002 | CDK18    | cyclin dependent kinase 18                  |
| Q01850 | CDR2     | cerebellar degeneration related protein 2   |
| Q92903 | CDS1     | CDP-diacylglycerol synthase 1               |
| Q9BXF3 | CECR2    | CECR2, histone acetyl-lysine reader         |
| O95319 | CELF2    | CUGBP Elav-like family member 2             |
| Q8WUJ3 | CEMIP    | cell migration inducing hyaluronidase 1     |
| Q66GS9 | CEP135   | centrosomal protein 135                     |
| O14647 | CHD2     | chromodomain helicase DNA binding protein 2 |
| Q9P2D1 | CHD7     | chromodomain helicase DNA binding protein 7 |
| P35790 | CHKA     | choline kinase alpha                        |
| O00533 | CHL1     | cell adhesion molecule L1 like              |
| Q9C0C6 | CIPC     | CLOCK interacting pacemaker                 |
| Q07065 | CKAP4    | cytoskeleton associated protein 4           |
| P51790 | CLCN3    | chloride voltage-gated channel 3            |
| P51795 | CLCN5    | chloride voltage-gated channel 5            |
| P49760 | CLK2     | CDC like kinase 2                           |
| Q9H4D0 | CLSTN2   | calsyntenin 2                               |
| Q99788 | CMKLR1   | chemerin chemokine-like receptor 1          |
| Q15417 | CNN3     | calponin 3                                  |
| P83436 | COG7     | component of oligomeric golgi complex 7     |
| Q14993 | COL19A1  | collagen type XIX alpha 1 chain             |
| Q96P44 | COL21A1  | collagen type XXI alpha 1 chain             |
| Q9Y6Z7 | COLEC10  | collectin subfamily member 10               |

|        |          |                                                               |
|--------|----------|---------------------------------------------------------------|
| Q8IYK4 | COLGALT2 | collagen beta(1-O)galactosyltransferase 2                     |
| P61923 | COPZ1    | coatamer protein complex subunit zeta 1                       |
| Q9BRF8 | CPPED1   | calcineurin like phosphoesterase domain containing 1          |
| P16220 | CREB1    | cAMP responsive element binding protein 1                     |
| Q8IUR6 | CREBRF   | CREB3 regulatory factor                                       |
| P09603 | CSF1     | colony stimulating factor 1                                   |
| Q16527 | CSRP2    | cysteine and glycine rich protein 2                           |
| P32929 | CTH      | cystathionine gamma-lyase                                     |
| Q7Z7A3 | CTU1     | cytosolic thiouridylase subunit 1                             |
| Q9NYL5 | CYP39A1  | cytochrome P450 family 39 subfamily A member 1                |
| Q5T6F0 | DCAF12   | DDB1 and CUL4 associated factor 12                            |
| P61962 | DCAF7    | DDB1 and CUL4 associated factor 7                             |
| Q9NPI6 | DCP1A    | decapping mRNA 1A                                             |
| Q92564 | DCUN1D4  | defective in cullin neddylation 1 domain containing 4         |
| P17844 | DDX5     | DEAD-box helicase 5                                           |
| Q8N2C3 | DEPDC4   | DEP domain containing 4                                       |
| Q5T7M9 | DIPK1A   | divergent protein kinase domain 1A                            |
| Q9UBU2 | DKK2     | dickkopf WNT signaling pathway inhibitor 2                    |
| Q9NR61 | DLL4     | delta like canonical Notch ligand 4                           |
| O75165 | DNAJC13  | DnaJ heat shock protein family (Hsp40) member C13             |
| Q9NZQ0 | DNAJC27  | DnaJ heat shock protein family (Hsp40) member C27             |
| Q8TEK3 | DOT1L    | DOT1 like histone lysine methyltransferase                    |
| Q9Y4J8 | DTNA     | dystrobrevin alpha                                            |
| Q8TCX1 | DYNC2LI1 | dynein cytoplasmic 2 light intermediate chain 1               |
| Q96FJ2 | DYNLL2   | dynein light chain LC8-type 2                                 |
| Q13627 | DYRK1A   | dual specificity tyrosine phosphorylation regulated kinase 1A |
| Q96AV8 | E2F7     | E2F transcription factor 7                                    |
| P0DPD6 | ECE2     | endothelin converting enzyme 2                                |
| Q9UNE0 | EDAR     | ectodysplasin A receptor                                      |

|  |        |                |                                                                                |
|--|--------|----------------|--------------------------------------------------------------------------------|
|  | Q9BZQ6 | EDEM3          | ER degradation enhancing alpha-mannosidase like protein 3                      |
|  | Q3B7T1 | EDRF1          | erythroid differentiation regulatory factor 1                                  |
|  | P0DPD8 | EEF1AKMT4-ECE2 | EEF1AKMT4-ECE2 readthrough                                                     |
|  | P52799 | EFNB2          | ephrin B2                                                                      |
|  | P00533 | EGFR           | epidermal growth factor receptor                                               |
|  | Q9NZC4 | EHF            | ETS homologous factor                                                          |
|  | Q9GZV4 | EIF5A2         | eukaryotic translation initiation factor 5A2                                   |
|  | Q12926 | ELAVL2         | ELAV like RNA binding protein 2                                                |
|  | Q5R3F8 | ELFN2          | extracellular leucine rich repeat and fibronectin type III domain containing 2 |
|  | P19622 | EN2            | engrailed homeobox 2                                                           |
|  | P21128 | ENDOU          | endonuclease, poly(U) specific                                                 |
|  | P11171 | EPB41          | erythrocyte membrane protein band 4.1                                          |
|  | Q9HCS5 | EPB41L4A       | erythrocyte membrane protein band 4.1 like 4A                                  |
|  | Q12929 | EPS8           | epidermal growth factor receptor pathway substrate 8                           |
|  | P11308 | ERG            | ETS transcription factor ERG                                                   |
|  | Q5RHP9 | ERICH3         | glutamate rich 3                                                               |
|  | Q99502 | EYA1           | EYA transcriptional coactivator and phosphatase 1                              |
|  | O95677 | EYA4           | EYA transcriptional coactivator and phosphatase 4                              |
|  | Q5T9C2 | FAM102A        | family with sequence similarity 102 member A                                   |
|  | Q9BYI3 | FAM126A        | family with sequence similarity 126 member A                                   |
|  | Q5BKY9 | FAM133B        | family with sequence similarity 133 member B                                   |
|  | Q5VUB5 | FAM171A1       | family with sequence similarity 171 member A1                                  |
|  | Q8NB25 | FAM184A        | family with sequence similarity 184 member A                                   |
|  | Q9NX38 | FAM206A        | family with sequence similarity 206 member A                                   |
|  | Q9NTX9 | FAM217B        | family with sequence similarity 217 member B                                   |
|  | Q5HYJ3 | FAM76B         | family with sequence similarity 76 member B                                    |
|  | Q5JUQ0 | FAM78A         | family with sequence similarity 78 member A                                    |

|  |        |         |                                                        |
|--|--------|---------|--------------------------------------------------------|
|  | Q9UBX5 | FBLN5   | fibulin 5                                              |
|  | Q9UK96 | FBXO10  | F-box protein 10                                       |
|  | Q9NWN3 | FBXO34  | F-box protein 34                                       |
|  | P0C2W1 | FBXO45  | F-box protein 45                                       |
|  | Q969H0 | FBXW7   | F-box and WD repeat domain containing 7                |
|  | Q96LA6 | FCRL1   | Fc receptor like 1                                     |
|  | Q96LA5 | FCRL2   | Fc receptor like 2                                     |
|  | Q6ZV73 | FGD6    | FYVE, RhoGEF and PH domain containing 6                |
|  | P21781 | FGF7    | fibroblast growth factor 7                             |
|  | Q9NZU0 | FLRT3   | fibronectin leucine rich transmembrane protein 3       |
|  | P02751 | FN1     | fibronectin 1                                          |
|  | P53539 | FOSB    | FosB proto-oncogene, AP-1 transcription factor subunit |
|  | P55318 | FOXA3   | forkhead box A3                                        |
|  | Q12778 | FOXO1   | forkhead box O1                                        |
|  | O43524 | FOXO3   | forkhead box O3                                        |
|  | Q8IVH2 | FOXP4   | forkhead box P4                                        |
|  | Q96NE9 | FRMD6   | FERM domain containing 6                               |
|  | O43559 | FRS3    | fibroblast growth factor receptor substrate 3          |
|  | Q96I24 | FUBP3   | far upstream element binding protein 3                 |
|  | Q9ULV1 | FZD4    | frizzled class receptor 4                              |
|  | Q13480 | GAB1    | GRB2 associated binding protein 1                      |
|  | Q14435 | GALNT3  | polypeptide N-acetylgalactosaminyltransferase 3        |
|  | Q86SF2 | GALNT7  | polypeptide N-acetylgalactosaminyltransferase 7        |
|  | Q9H706 | GAREM1  | GRB2 associated regulator of MAPK1 subtype 1           |
|  | P23769 | GATA2   | GATA binding protein 2                                 |
|  | P23771 | GATA3   | GATA binding protein 3                                 |
|  | Q92908 | GATA6   | GATA binding protein 6                                 |
|  | Q86YP4 | GATAD2A | GATA zinc finger domain containing 2A                  |
|  | O43716 | GATC    | glutamyl-tRNA amidotransferase subunit C               |

|  |        |         |                                                          |
|--|--------|---------|----------------------------------------------------------|
|  | Q8IWJ2 | GCC2    | GRIP and coiled-coil domain containing 2                 |
|  | P55040 | GEM     | GTP binding protein overexpressed in skeletal muscle     |
|  | O94808 | GFPT2   | glutamine-fructose-6-phosphate transaminase 2            |
|  | P23416 | GLRA2   | glycine receptor alpha 2                                 |
|  | Q9NZD2 | GLTP    | glycolipid transfer protein                              |
|  | Q9UBI6 | GNG12   | G protein subunit gamma 12                               |
|  | P15586 | GNS     | glucosamine (N-acetyl)-6-sulfatase                       |
|  | Q92805 | GOLGA1  | golgin A1                                                |
|  | Q8NBj4 | GOLM1   | golgi membrane protein 1                                 |
|  | Q9HCL2 | GPAM    | glycerol-3-phosphate acyltransferase, mitochondrial      |
|  | P43304 | GPD2    | glycerol-3-phosphate dehydrogenase 2                     |
|  | P46095 | GPR6    | G protein-coupled receptor 6                             |
|  | Q8TD30 | GPT2    | glutamic--pyruvic transaminase 2                         |
|  | Q3KR37 | GRAMD1B | GRAM domain containing 1B                                |
|  | P62993 | GRB2    | growth factor receptor bound protein 2                   |
|  | P42263 | GRIA3   | glutamate ionotropic receptor AMPA type subunit 3        |
|  | P48058 | GRIA4   | glutamate ionotropic receptor AMPA type subunit 4        |
|  | O15399 | GRIN2D  | glutamate ionotropic receptor NMDA type subunit 2D       |
|  | P41594 | GRM5    | glutamate metabotropic receptor 5                        |
|  | P15170 | GSPT1   | G1 to S phase transition 1                               |
|  | Q4G148 | GXYLT1  | glucoside xylosyltransferase 1                           |
|  | P10915 | HAPLN1  | hyaluronan and proteoglycan link protein 1               |
|  | Q99075 | HBEGF   | heparin binding EGF like growth factor                   |
|  | Q9H0R4 | HDHD2   | haloacid dehalogenase like hydrolase domain containing 2 |
|  | Q9ULI3 | HEG1    | heart development protein with EGF like domains 1        |
|  | Q14526 | HIC1    | HIC ZBTB transcriptional repressor 1                     |
|  | O00291 | HIP1    | huntingtin interacting protein 1                         |
|  | Q9H2X6 | HIPK2   | homeodomain interacting protein kinase 2                 |

|  |        |          |                                                                |
|--|--------|----------|----------------------------------------------------------------|
|  | Q5T1R4 | HIVEP3   | human immunodeficiency virus type I enhancer binding protein 3 |
|  | P04035 | HMGCR    | 3-hydroxy-3-methylglutaryl-CoA reductase                       |
|  | P31260 | HOXA10   | homeobox A10                                                   |
|  | P20719 | HOXA5    | homeobox A5                                                    |
|  | P09630 | HOXC6    | homeobox C6                                                    |
|  | Q7LGA3 | HS2ST1   | heparan sulfate 2-O-sulfotransferase 1                         |
|  | Q53GQ0 | HSD17B12 | hydroxysteroid 17-beta dehydrogenase 12                        |
|  | Q3SXM5 | HSDL1    | hydroxysteroid dehydrogenase like 1                            |
|  | P10809 | HSPD1    | heat shock protein family D (Hsp60) member 1                   |
|  | Q92598 | HSPH1    | heat shock protein family H (Hsp110) member 1                  |
|  | Q9Y4L1 | HYOU1    | hypoxia up-regulated 1                                         |
|  | P47928 | ID4      | inhibitor of DNA binding 4, HLH protein                        |
|  | Q9UKS7 | IKZF2    | IKAROS family zinc finger 2                                    |
|  | Q16352 | INA      | internexin neuronal intermediate filament protein alpha        |
|  | Q8WYH8 | ING5     | inhibitor of growth family member 5                            |
|  | Q53TQ3 | INO80D   | INO80 complex subunit D                                        |
|  | P49441 | INPP1    | inositol polyphosphate-1-phosphatase                           |
|  | Q15735 | INPP5J   | inositol polyphosphate-5-phosphatase J                         |
|  | Q96T92 | INSM2    | INSM transcriptional repressor 2                               |
|  | P06213 | INSR     | insulin receptor                                               |
|  | Q8NFU5 | IPMK     | inositol polyphosphate multikinase                             |
|  | Q15306 | IRF4     | interferon regulatory factor 4                                 |
|  | P61371 | ISL1     | ISL LIM homeobox 1                                             |
|  | P08648 | ITGA5    | integrin subunit alpha 5                                       |
|  | P53708 | ITGA8    | integrin subunit alpha 8                                       |
|  | Q9NZM3 | ITSN2    | intersectin 2                                                  |
|  | Q92831 | KAT2B    | lysine acetyltransferase 2B                                    |
|  | Q8NFY9 | KBTBD8   | kelch repeat and BTB domain containing 8                       |

|  |        |           |                                                          |
|--|--------|-----------|----------------------------------------------------------|
|  | Q9P0J7 | KCMF1     | potassium channel modulatory factor 1                    |
|  | P22459 | KCNA4     | potassium voltage-gated channel subfamily A member 4     |
|  | P48549 | KCNJ3     | potassium voltage-gated channel subfamily J member 3     |
|  | O95069 | KCNK2     | potassium two pore domain channel subfamily K member 2   |
|  | Q13303 | KCNK5     | potassium two pore domain channel subfamily K member 5   |
|  | O95279 | KCNN3     | potassium calcium-activated channel subfamily N member 3 |
|  | Q9BQ13 | KCTD14    | potassium channel tetramerization domain containing 14   |
|  | Q6ZWB6 | KCTD8     | potassium channel tetramerization domain containing 8    |
|  | Q9Y4C1 | KDM3A     | lysine demethylase 3A                                    |
|  | Q6ZMT4 | KDM7A     | lysine demethylase 7A                                    |
|  | Q92945 | KHSRP     | KH-type splicing regulatory protein                      |
|  | Q8IZA0 | KIAA0319L | KIAA0319 like                                            |
|  | Q2LD37 | KIAA1109  | KIAA1109                                                 |
|  | Q6NV74 | KIAA1211L | KIAA1211 like                                            |
|  | P21583 | KITLG     | KIT ligand                                               |
|  | P57682 | KLF3      | Kruppel like factor 3                                    |
|  | Q96CT2 | KLHL29    | kelch like family member 29                              |
|  | Q9H511 | KLHL31    | kelch like family member 31                              |
|  | Q8NEZ4 | KMT2C     | lysine methyltransferase 2C                              |
|  | Q9NQR1 | KMT5A     | lysine methyltransferase 5A                              |
|  | Q4FZB7 | KMT5B     | lysine methyltransferase 5B                              |
|  | O00505 | KPNA3     | karyopherin subunit alpha 3                              |
|  | Q14974 | KPNB1     | karyopherin subunit beta 1                               |
|  | Q71RC2 | LARP4     | La ribonucleoprotein domain family member 4              |
|  | Q96JN0 | LCOR      | ligand dependent nuclear receptor corepressor            |
|  | P42702 | LIFR      | LIF receptor alpha                                       |
|  | P53667 | LIMK1     | LIM domain kinase 1                                      |
|  | A6NK58 | LIPT2     | lipoyl(octanoyl) transferase 2                           |
|  | Q99732 | LITAF     | lipopolysaccharide induced TNF factor                    |



|  |        |        |                                                                          |
|--|--------|--------|--------------------------------------------------------------------------|
|  | Q86WA8 | LONP2  | lon peptidase 2, peroxisomal                                             |
|  | Q17RB8 | LONRF1 | LON peptidase N-terminal domain and ring finger 1                        |
|  | P28300 | LOX    | lysyl oxidase                                                            |
|  | P43657 | LPAR6  | lysophosphatidic acid receptor 6                                         |
|  | Q8NF37 | LPCAT1 | lysophosphatidylcholine acyltransferase 1                                |
|  | Q14693 | LPIN1  | lipin 1                                                                  |
|  | Q7Z3D4 | LYSMD3 | LysM domain containing 3                                                 |
|  | Q5TCQ9 | MAGI3  | membrane associated guanylate kinase, WW and PDZ domain containing 3     |
|  | P46821 | MAP1B  | microtubule associated protein 1B                                        |
|  | P45985 | MAP2K4 | mitogen-activated protein kinase kinase 4                                |
|  | O14733 | MAP2K7 | mitogen-activated protein kinase kinase 7                                |
|  | Q9Y6R4 | MAP3K4 | mitogen-activated protein kinase kinase kinase 4                         |
|  | Q16539 | MAPK14 | mitogen-activated protein kinase 14                                      |
|  | Q5VT66 | MARC1  | mitochondrial amidoxime reducing component 1                             |
|  | Q9P0L2 | MARK1  | microtubule affinity regulating kinase 1                                 |
|  | O15232 | MATN3  | matrilin 3                                                               |
|  | Q05BQ5 | MBTD1  | mbt domain containing 1                                                  |
|  | O15151 | MDM4   | MDM4, p53 regulator                                                      |
|  | Q9NU22 | MDN1   | midasin AAA ATPase 1                                                     |
|  | Q86YW9 | MED12L | mediator complex subunit 12 like                                         |
|  | O60244 | MED14  | mediator complex subunit 14                                              |
|  | Q9UM21 | MGAT4A | alpha-1,3-mannosyl-glycoprotein 4-beta-N-acetylglucosaminyltransferase A |
|  | Q8N344 | MIER2  | MIER family member 2                                                     |
|  | Q7Z3K6 | MIER3  | MIER family member 3                                                     |
|  | Q7L4E1 | MIGA2  | mitoguardin 2                                                            |
|  | Q9UL63 | MKLN1  | muskelin 1                                                               |
|  | Q9HBH9 | MKNK2  | MAP kinase interacting serine/threonine kinase 2                         |

|  |        |               |                                                                                                |
|--|--------|---------------|------------------------------------------------------------------------------------------------|
|  | Q15546 | MMD           | monocyte to macrophage differentiation associated                                              |
|  | O95396 | MOCS3         | molybdenum cofactor synthesis 3                                                                |
|  | O60783 | MRPS14        | mitochondrial ribosomal protein S14                                                            |
|  | Q9GZW8 | MS4A7         | membrane spanning 4-domains A7                                                                 |
|  | Q68DK7 | MSL1          | MSL complex subunit 1                                                                          |
|  | Q9NYA4 | MTMR4         | myotubularin related protein 4                                                                 |
|  | Q8N3F0 | MTURN         | maturin, neural progenitor differentiation regulator homolog                                   |
|  | P35580 | MYH10         | myosin heavy chain 10                                                                          |
|  | Q01538 | MYT1          | myelin transcription factor 1                                                                  |
|  | Q96AH0 | NABP1         | nucleic acid binding protein 1                                                                 |
|  | Q8IVL1 | NAV2          | neuron navigator 2                                                                             |
|  | P61601 | NCALD         | neurocalcin delta                                                                              |
|  | P13591 | NCAM1         | neural cell adhesion molecule 1                                                                |
|  | Q9HCD5 | NCOA5         | nuclear receptor coactivator 5                                                                 |
|  | Q8NI08 | NCOA7         | nuclear receptor coactivator 7                                                                 |
|  | E9PQ53 | NDUFC2-KCTD14 | NDUFC2-KCTD14 readthrough                                                                      |
|  | O43181 | NDUFS4        | NADH:ubiquinone oxidoreductase subunit S4                                                      |
|  | Q8N987 | NECAB1        | N-terminal EF-hand calcium binding protein 1                                                   |
|  | Q8NC96 | NECAP1        | NECAP endocytosis associated 1                                                                 |
|  | P46934 | NEDD4         | neural precursor cell expressed, developmentally down-regulated 4, E3 ubiquitin protein ligase |
|  | Q9HC98 | NEK6          | NIMA related kinase 6                                                                          |
|  | A6NFY4 | NEMP2         | nuclear envelope integral membrane protein 2                                                   |
|  | Q8TDF5 | NETO1         | neuropilin and tolloid like 1                                                                  |
|  | A8MQ27 | NEURL1B       | neuralized E3 ubiquitin protein ligase 1B                                                      |
|  | Q96JN8 | NEURL4        | neuralized E3 ubiquitin protein ligase 4                                                       |
|  | P21359 | NF1           | neurofibromin 1                                                                                |
|  | P08138 | NGFR          | nerve growth factor receptor                                                                   |
|  | Q02577 | NHLH2         | nescient helix-loop-helix 2                                                                    |

|  |        |         |                                                    |
|--|--------|---------|----------------------------------------------------|
|  | Q0D2K0 | NIPAL4  | NIPA like domain containing 4                      |
|  | Q4KMZ8 | NKAIN1  | sodium/potassium transporting ATPase interacting 1 |
|  | P51513 | NOVA1   | NOVA alternative splicing regulator 1              |
|  | Q8IXF0 | NPAS3   | neuronal PAS domain protein 3                      |
|  | P55786 | NPEPPS  | aminopeptidase puromycin sensitive                 |
|  | Q9Y639 | NPTN    | neuroplastin                                       |
|  | Q14995 | NR1D2   | nuclear receptor subfamily 1 group D member 2      |
|  | P49116 | NR2C2   | nuclear receptor subfamily 2 group C member 2      |
|  | P24468 | NR2F2   | nuclear receptor subfamily 2 group F member 2      |
|  | P10588 | NR2F6   | nuclear receptor subfamily 2 group F member 6      |
|  | P04150 | NR3C1   | nuclear receptor subfamily 3 group C member 1      |
|  | O00482 | NR5A2   | nuclear receptor subfamily 5 group A member 2      |
|  | Q7Z6K4 | NRARP   | NOTCH regulated ankyrin repeat protein             |
|  | Q96F24 | NRBF2   | nuclear receptor binding factor 2                  |
|  | Q16612 | NREP    | neuronal regeneration related protein              |
|  | Q7Z2Y5 | NRK     | Nik related kinase                                 |
|  | O60462 | NRP2    | neuropilin 2                                       |
|  | Q96L73 | NSD1    | nuclear receptor binding SET domain protein 1      |
|  | Q8TEM1 | NUP210  | nucleoporin 210                                    |
|  | Q9UBU9 | NXF1    | nuclear RNA export factor 1                        |
|  | Q9NPJ8 | NXT2    | nuclear transport factor 2 like export factor 2    |
|  | Q86UD1 | OAF     | out at first homolog                               |
|  | O60502 | OGA     | O-GlcNAcase                                        |
|  | O95948 | ONECUT2 | one cut homeobox 2                                 |
|  | Q96BN8 | OTULIN  | OTU deubiquitinase with linear linkage specificity |
|  | P32243 | OTX2    | orthodenticle homeobox 2                           |
|  | Q9BPZ3 | PAIP2   | poly(A) binding protein interacting protein 2      |
|  | Q9ULR5 | PAIP2B  | poly(A) binding protein interacting protein 2B     |
|  | Q8IXS6 | PALM2   | paralemmin 2                                       |

|  |        |        |                                                                        |
|--|--------|--------|------------------------------------------------------------------------|
|  | Q8TE04 | PANK1  | pantothenate kinase 1                                                  |
|  | Q6ZVX9 | PAQR9  | progesterin and adipoQ receptor family member 9                        |
|  | Q9BYG5 | PARD6B | par-6 family cell polarity regulator beta                              |
|  | Q9HBE1 | PATZ1  | POZ/BTB and AT hook containing zinc finger 1                           |
|  | P55771 | PAX9   | paired box 9                                                           |
|  | Q9HC56 | PCDH9  | protocadherin 9                                                        |
|  | Q9Y6V0 | PCLO   | piccolo presynaptic cytomatrix protein                                 |
|  | Q96RV3 | PCNX1  | pecanex 1                                                              |
|  | Q9Y233 | PDE10A | phosphodiesterase 10A                                                  |
|  | Q13370 | PDE3B  | phosphodiesterase 3B                                                   |
|  | Q9NP56 | PDE7B  | phosphodiesterase 7B                                                   |
|  | O00330 | PDHX   | pyruvate dehydrogenase complex component X                             |
|  | Q14554 | PDIA5  | protein disulfide isomerase family A member 5                          |
|  | Q16654 | PDK4   | pyruvate dehydrogenase kinase 4                                        |
|  | O15530 | PDPK1  | 3-phosphoinositide dependent protein kinase 1                          |
|  | Q9NTI5 | PDS5B  | PDS5 cohesin associated factor B                                       |
|  | Q9H792 | PEAK1  | pseudopodium enriched atypical kinase 1                                |
|  | Q86TG7 | PEG10  | paternally expressed 10                                                |
|  | Q9HAT8 | PELI2  | pellino E3 ubiquitin protein ligase family member 2                    |
|  | P02776 | PF4    | platelet factor 4                                                      |
|  | P10720 | PF4V1  | platelet factor 4 variant 1                                            |
|  | P35232 | PHB    | prohibitin                                                             |
|  | Q6ZVD8 | PHLPP2 | PH domain and leucine rich repeat protein phosphatase 2                |
|  | P42336 | PIK3CA | phosphatidylinositol-4,5-bisphosphate 3-kinase catalytic subunit alpha |
|  | P61925 | PKIA   | cAMP-dependent protein kinase inhibitor alpha                          |
|  | Q6DJT9 | PLAG1  | PLAG1 zinc finger                                                      |
|  | Q4KWH8 | PLCH1  | phospholipase C eta 1                                                  |
|  | Q9UPR0 | PLCL2  | phospholipase C like 2                                                 |

|  |        |         |                                                          |
|--|--------|---------|----------------------------------------------------------|
|  | Q9HAU0 | PLEKHA5 | pleckstrin homology domain containing A5                 |
|  | Q9ULM0 | PLEKHH1 | pleckstrin homology, MyTH4 and FERM domain containing H1 |
|  | Q9NW61 | PLEKHJ1 | pleckstrin homology domain containing J1                 |
|  | Q9NYY3 | PLK2    | polo like kinase 2                                       |
|  | O14495 | PLPP3   | phospholipid phosphatase 3                               |
|  | Q8TBJ4 | PLPPR1  | phospholipid phosphatase related 1                       |
|  | Q9Y4D7 | PLXND1  | plexin D1                                                |
|  | Q8TF01 | PNISR   | PNN interacting serine and arginine rich protein         |
|  | Q8N490 | PNKD    | PNKD, MBL domain containing                              |
|  | Q6ZV29 | PNPLA7  | patatin like phospholipase domain containing 7           |
|  | Q8NBL1 | POGLUT1 | protein O-glucosyltransferase 1                          |
|  | Q9UKI9 | POU2F3  | POU class 2 homeobox 3                                   |
|  | P20265 | POU3F2  | POU class 3 homeobox 2                                   |
|  | P37231 | PPARG   | peroxisome proliferator activated receptor gamma         |
|  | P30405 | PPIF    | peptidylprolyl isomerase F                               |
|  | P36873 | PPP1CC  | protein phosphatase 1 catalytic subunit gamma            |
|  | Q9NY27 | PPP4R2  | protein phosphatase 4 regulatory subunit 2               |
|  | P54646 | PRKAA2  | protein kinase AMP-activated catalytic subunit alpha 2   |
|  | P05771 | PRKCB   | protein kinase C beta                                    |
|  | Q13976 | PRKG1   | protein kinase cGMP-dependent 1                          |
|  | P51817 | PRKX    | protein kinase X-linked                                  |
|  | P16471 | PRLR    | prolactin receptor                                       |
|  | Q9NR22 | PRMT8   | protein arginine methyltransferase 8                     |
|  | P79522 | PRR3    | proline rich 3                                           |
|  | P49768 | PSEN1   | presenilin 1                                             |
|  | P25786 | PSMA1   | proteasome subunit alpha 1                               |
|  | Q8WXF1 | PSPC1   | paraspeckle component 1                                  |
|  | Q13635 | PTCH1   | patched 1                                                |
|  | Q13258 | PTGDR   | prostaglandin D2 receptor                                |

|        |           |                                                                 |
|--------|-----------|-----------------------------------------------------------------|
| P43115 | PTGER3    | prostaglandin E receptor 3                                      |
| Q96PU8 | QKI       | QKI, KH domain containing RNA binding                           |
| Q6WKZ4 | RAB11FIP1 | RAB11 family interacting protein 1                              |
| Q2PPJ7 | RALGAPA2  | Ral GTPase activating protein catalytic alpha subunit 2         |
| P10114 | RAP2A     | RAP2A, member of RAS oncogene family                            |
| Q9Y4G8 | RAPGEF2   | Rap guanine nucleotide exchange factor 2                        |
| Q70E73 | RAPH1     | Ras association (RalGDS/AF-6) and pleckstrin homology domains 1 |
| P10276 | RARA      | retinoic acid receptor alpha                                    |
| Q86WH2 | RASSF3    | Ras association domain family member 3                          |
| Q6ZRY4 | RBPM5     | RNA binding protein, mRNA processing factor 2                   |
| Q5TC82 | RC3H1     | ring finger and CCCH-type domains 1                             |
| Q14206 | RCAN2     | regulator of calcineurin 2                                      |
| Q8NDN9 | RCBTB1    | RCC1 and BTB domain containing protein 1                        |
| Q9P2K3 | RCOR3     | REST corepressor 3                                              |
| P78509 | RELN      | reelin                                                          |
| Q96D71 | REPS1     | RALBP1 associated Eps domain containing 1                       |
| O15211 | RGL2      | ral guanine nucleotide dissociation stimulator like 2           |
| Q7Z3J3 | RGPD4     | RANBP2-like and GRIP domain containing 4                        |
| Q99666 | RGPD5     | RANBP2-like and GRIP domain containing 5                        |
| Q99666 | RGPD6     | RANBP2-like and GRIP domain containing 6                        |
| O14715 | RGPD8     | RANBP2-like and GRIP domain containing 8                        |
| P57771 | RGS8      | regulator of G protein signaling 8                              |
| Q9Y4F9 | RIPOR2    | RHO family interacting cell polarization regulator 2            |
| Q9H871 | RMND5A    | required for meiotic nuclear division 5 homolog A               |
| Q8WU17 | RNF139    | ring finger protein 139                                         |
| Q8WVD5 | RNF141    | ring finger protein 141                                         |
| Q8N6D2 | RNF182    | ring finger protein 182                                         |
| Q9H0F5 | RNF38     | ring finger protein 38                                          |

|  |        |          |                                                       |
|--|--------|----------|-------------------------------------------------------|
|  | O76064 | RNF8     | ring finger protein 8                                 |
|  | O60942 | RNGTT    | RNA guanylyltransferase and 5'-phosphatase            |
|  | P10155 | RO60     | Ro60, Y RNA binding protein                           |
|  | Q01973 | ROR1     | receptor tyrosine kinase like orphan receptor 1       |
|  | Q68CZ1 | RPGRIP1L | RPGRIP1 like                                          |
|  | P04844 | RPN2     | ribophorin II                                         |
|  | O75582 | RPS6KA5  | ribosomal protein S6 kinase A5                        |
|  | P23443 | RPS6KB1  | ribosomal protein S6 kinase B1                        |
|  | Q92766 | RREB1    | ras responsive element binding protein 1              |
|  | Q6PCB5 | RSBN1L   | round spermatid basic protein 1 like                  |
|  | Q9BXY4 | RSPO3    | R-spondin 3                                           |
|  | Q7L099 | RUFY3    | RUN and FYVE domain containing 3                      |
|  | Q01196 | RUNX1    | runt related transcription factor 1                   |
|  | Q8N488 | RYBP     | RING1 and YY1 binding protein                         |
|  | Q9UPW6 | SATB2    | SATB homeobox 2                                       |
|  | Q86WG5 | SBF2     | SET binding factor 2                                  |
|  | Q99590 | SCAF11   | SR-related CTD associated factor 11                   |
|  | Q8N9R8 | SCAI     | suppressor of cancer cell invasion                    |
|  | P35498 | SCN1A    | sodium voltage-gated channel alpha subunit 1          |
|  | Q99442 | SEC62    | SEC62 homolog, preprotein translocation factor        |
|  | Q96EE3 | SEH1L    | SEH1 like nucleoporin                                 |
|  | Q9H2E6 | SEMA6A   | semaphorin 6A                                         |
|  | Q8NFY4 | SEMA6D   | semaphorin 6D                                         |
|  | O75326 | SEMA7A   | semaphorin 7A (John Milton Hagen blood group)         |
|  | Q8NC51 | SERBP1   | SERPINE1 mRNA binding protein 1                       |
|  | Q9C0A6 | SETD5    | SET domain containing 5                               |
|  | Q8N474 | SFRP1    | secreted frizzled related protein 1                   |
|  | Q12872 | SFSWAP   | splicing factor SWAP                                  |
|  | Q9BQI5 | SGIP1    | SH3 domain GRB2 like endophilin interacting protein 1 |

|            |          |                                                            |
|------------|----------|------------------------------------------------------------|
| Q99963     | SH3GL3   | SH3 domain containing GRB2 like 3, endophilin A3           |
| Q6S5L8     | SHC4     | SHC adaptor protein 4                                      |
| Q5VZ18     | SHE      | Src homology 2 domain containing E                         |
| P57059     | SIK1     | salt inducible kinase 1                                    |
| A0A0B4J2F2 | SIK1B    | salt inducible kinase 1B (putative)                        |
| Q15475     | SIX1     | SIX homeobox 1                                             |
| Q8WWT9     | SLC13A3  | solute carrier family 13 member 3                          |
| A1A5C7     | SLC22A23 | solute carrier family 22 member 23                         |
| O60721     | SLC24A1  | solute carrier family 24 member 1                          |
| Q8NFF2     | SLC24A4  | solute carrier family 24 member 4                          |
| P16260     | SLC25A16 | solute carrier family 25 member 16                         |
| Q6KCM7     | SLC25A25 | solute carrier family 25 member 25                         |
| Q8NEW0     | SLC30A7  | solute carrier family 30 member 7                          |
| Q9Y2D2     | SLC35A3  | solute carrier family 35 member A3                         |
| Q5T1Q4     | SLC35F1  | solute carrier family 35 member F1                         |
| A4IF30     | SLC35F4  | solute carrier family 35 member F4                         |
| Q8N1S5     | SLC39A11 | solute carrier family 39 member 11                         |
| Q9GZV3     | SLC5A7   | solute carrier family 5 member 7                           |
| P30531     | SLC6A1   | solute carrier family 6 member 1                           |
| Q9UPY5     | SLC7A11  | solute carrier family 7 member 11                          |
| P52569     | SLC7A2   | solute carrier family 7 member 2                           |
| Q6AI14     | SLC9A4   | solute carrier family 9 member A4                          |
| Q96T83     | SLC9A7   | solute carrier family 9 member A7                          |
| Q4ZJI4     | SLC9B1   | solute carrier family 9 member B1                          |
| Q9H2Y9     | SLCO5A1  | solute carrier organic anion transporter family member 5A1 |
| Q08AF3     | SLFN5    | schlafen family member 5                                   |
| O94813     | SLIT2    | slit guidance ligand 2                                     |
| Q96PX8     | SLITRK1  | SLIT and NTRK like family member 1                         |
| Q13485     | SMAD4    | SMAD family member 4                                       |



|        |            |                                                           |
|--------|------------|-----------------------------------------------------------|
| Q99717 | SMAD5      | SMAD family member 5                                      |
| O15198 | SMAD9      | SMAD family member 9                                      |
| Q9H3U7 | SMOC2      | SPARC related modular calcium binding 2                   |
| P60880 | SNAP25     | synaptosome associated protein 25                         |
| O75324 | SNN        | stannin                                                   |
| Q8WVK2 | SNRNP27    | small nuclear ribonucleoprotein U4/U6.U5 subunit 27       |
| Q9Y5X0 | SNX10      | sorting nexin 10                                          |
| O94964 | SOGA1      | suppressor of glucose, autophagy associated 1             |
| Q92673 | SORL1      | sortilin related receptor 1                               |
| Q07889 | SOS1       | SOS Ras/Rac guanine nucleotide exchange factor 1          |
| Q2M3V2 | SOWAHA     | sosondowah ankyrin repeat domain family member A          |
| P35716 | SOX11      | SRY-box 11                                                |
| Q9BT81 | SOX7       | SRY-box 7                                                 |
| Q96N96 | SPATA13    | spermatogenesis associated 13                             |
| O43597 | SPRY2      | sprouty RTK signaling antagonist 2                        |
| O15270 | SPTLC2     | serine palmitoyltransferase long chain base subunit 2     |
| O75044 | SRGAP2     | SLIT-ROBO Rho GTPase activating protein 2                 |
| Q86TD4 | SRL        | sarcalumenin                                              |
| P09132 | SRP19      | signal recognition particle 19                            |
| O75177 | SS18L1     | SS18L1, nBAF chromatin remodeling complex subunit         |
| Q8WYL5 | SSH1       | slingshot protein phosphatase 1                           |
| Q9Y5Y6 | ST14       | suppression of tumorigenicity 14                          |
| Q9Y274 | ST3GAL6    | ST3 beta-galactoside alpha-2,3-sialyltransferase 6        |
| Q8NDV1 | ST6GALNAC3 | ST6 N-acetylgalactosaminide alpha-2,6-sialyltransferase 3 |
| Q8WWQ8 | STAB2      | stabilin 2                                                |
| Q99469 | STAC       | SH3 and cysteine rich domain                              |
| Q8WVM7 | STAG1      | stromal antigen 1                                         |
| Q9UEW8 | STK39      | serine/threonine kinase 39                                |
| Q93045 | STMN2      | stathmin 2                                                |

|        |          |                                                         |
|--------|----------|---------------------------------------------------------|
| O14662 | STX16    | syntaxin 16                                             |
| Q6J9G0 | STYK1    | serine/threonine/tyrosine kinase 1                      |
| Q9UBS9 | SUCO     | SUN domain containing ossification factor               |
| O43426 | SYNJ1    | synaptojanin 1                                          |
| Q9UMZ2 | SYNRG    | synergin gamma                                          |
| Q7Z422 | SZRD1    | SUZ RNA binding domain containing 1                     |
| Q8N5C8 | TAB3     | TGF-beta activated kinase 1 (MAP3K7) binding protein 3  |
| O75529 | TAF5L    | TATA-box binding protein associated factor 5 like       |
| Q6NXT6 | TAPT1    | transmembrane anterior posterior transformation 1       |
| Q16650 | TBR1     | T-box, brain 1                                          |
| Q9NR00 | TCIM     | transcriptional and immune response regulator           |
| P28347 | TEAD1    | TEA domain transcription factor 1                       |
| Q8NHR7 | TERB2    | telomere repeat binding bouquet formation protein 2     |
| Q8NFU7 | TET1     | tet methylcytosine dioxygenase 1                        |
| Q92481 | TFAP2B   | transcription factor AP-2 beta                          |
| Q03167 | TGFBR3   | transforming growth factor beta receptor 3              |
| P10828 | THRB     | thyroid hormone receptor beta                           |
| Q7Z2Z1 | TICRR    | TOPBP1 interacting checkpoint and replication regulator |
| Q86UE8 | TLK2     | tousled like kinase 2                                   |
| Q9Y2S6 | TMA7     | translation machinery associated 7 homolog              |
| P55061 | TMBIM6   | transmembrane BAX inhibitor motif containing 6          |
| O94876 | TMCC1    | transmembrane and coiled-coil domain family 1           |
| Q8WVE7 | TMEM170A | transmembrane protein 170A                              |
| Q5T4T1 | TMEM170B | transmembrane protein 170B                              |
| Q6ZMB5 | TMEM184A | transmembrane protein 184A                              |
| Q96MH6 | TMEM68   | transmembrane protein 68                                |
| Q6ZNR0 | TMEM91   | transmembrane protein 91                                |
| Q9NQ34 | TMEM9B   | TMEM9 domain family member B                            |
| Q7RTY8 | TMPRSS7  | transmembrane serine protease 7                         |

|  |        |          |                                                                  |
|--|--------|----------|------------------------------------------------------------------|
|  | Q92973 | TNPO1    | transportin 1                                                    |
|  | O15417 | TNRC18   | trinucleotide repeat containing 18                               |
|  | Q9UPQ9 | TNRC6B   | trinucleotide repeat containing 6B                               |
|  | O75674 | TOM1L1   | target of myb1 like 1 membrane trafficking protein               |
|  | Q5JU69 | TOR2A    | torsin family 2 member A                                         |
|  | P12270 | TPR      | translocated promoter region, nuclear basket protein             |
|  | Q13114 | TRAF3    | TNF receptor associated factor 3                                 |
|  | Q9Y228 | TRAF3IP3 | TRAF3 interacting protein 3                                      |
|  | Q9Y2L5 | TRAPPC8  | trafficking protein particle complex 8                           |
|  | Q96PN7 | TRERF1   | transcriptional regulating factor 1                              |
|  | Q7L0X0 | TRIL     | TLR4 interactor with leucine rich repeats                        |
|  | P36406 | TRIM23   | tripartite motif containing 23                                   |
|  | Q86XT4 | TRIM50   | tripartite motif containing 50                                   |
|  | Q8NET8 | TRPV3    | transient receptor potential cation channel subfamily V member 3 |
|  | Q92574 | TSC1     | TSC complex subunit 1                                            |
|  | O75157 | TSC22D2  | TSC22 domain family member 2                                     |
|  | Q9H0U9 | TSPYL1   | TSPY like 1                                                      |
|  | Q5SRH9 | TTC39A   | tetratricopeptide repeat domain 39A                              |
|  | Q9NUQ3 | TXLNG    | taxilin gamma                                                    |
|  | P61088 | UBE2N    | ubiquitin conjugating enzyme E2 N                                |
|  | Q13404 | UBE2V1   | ubiquitin conjugating enzyme E2 V1                               |
|  | O95071 | UBR5     | ubiquitin protein ligase E3 component n-recognin 5               |
|  | Q16739 | UGCG     | UDP-glucose ceramide glucosyltransferase                         |
|  | Q6BDS2 | UHRF1BP1 | UHRF1 binding protein 1                                          |
|  | Q8NB66 | UNC13C   | unc-13 homolog C                                                 |
|  | Q6UXZ4 | UNC5D    | unc-5 netrin receptor D                                          |
|  | Q9H9P5 | UNKL     | unk like zinc finger                                             |
|  | Q68DE3 | USF3     | upstream transcription factor family member 3                    |

|  |        |         |                                                                              |
|--|--------|---------|------------------------------------------------------------------------------|
|  | Q9UHP3 | USP25   | ubiquitin specific peptidase 25                                              |
|  | Q70CQ4 | USP31   | ubiquitin specific peptidase 31                                              |
|  | Q9H9J4 | USP42   | ubiquitin specific peptidase 42                                              |
|  | P62068 | USP46   | ubiquitin specific peptidase 46                                              |
|  | O95292 | VAPB    | VAMP associated protein B and C                                              |
|  | P52735 | VAV2    | vav guanine nucleotide exchange factor 2                                     |
|  | Q9UKW4 | VAV3    | vav guanine nucleotide exchange factor 3                                     |
|  | Q8N0Z9 | VSIG10  | V-set and immunoglobulin domain containing 10                                |
|  | Q9NX94 | WBP1L   | WW domain binding protein 1 like                                             |
|  | Q9H6R7 | WDCP    | WD repeat and coiled coil containing                                         |
|  | Q9Y2I8 | WDR37   | WD repeat domain 37                                                          |
|  | Q8TF74 | WIPF2   | WAS/WASL interacting protein family member 2                                 |
|  | Q9BYP7 | WNK3    | WNK lysine deficient protein kinase 3                                        |
|  | Q9Y6I7 | WSB1    | WD repeat and SOCS box containing 1                                          |
|  | O14980 | XPO1    | exportin 1                                                                   |
|  | P31946 | YWHAB   | tyrosine 3-monooxygenase/tryptophan 5-monooxygenase activation protein beta  |
|  | P27348 | YWHAQ   | tyrosine 3-monooxygenase/tryptophan 5-monooxygenase activation protein theta |
|  | Q9HC78 | ZBTB20  | zinc finger and BTB domain containing 20                                     |
|  | Q8NCN2 | ZBTB34  | zinc finger and BTB domain containing 34                                     |
|  | O15060 | ZBTB39  | zinc finger and BTB domain containing 39                                     |
|  | B2RXF5 | ZBTB42  | zinc finger and BTB domain containing 42                                     |
|  | Q8N2G6 | ZCCHC24 | zinc finger CCHC-type containing 24                                          |
|  | Q8IUH5 | ZDHHC17 | zinc finger DHHC-type containing 17                                          |
|  | Q9H8U3 | ZFAND3  | zinc finger AN1-type containing 3                                            |
|  | Q15911 | ZFH3    | zinc finger homeobox 3                                                       |
|  | P16415 | ZFP36   | ZFP36 ring finger protein                                                    |
|  | Q9UKY1 | ZHX1    | zinc fingers and homeoboxes 1                                                |

|       |        |            |                                    |                                                                                                                                 |
|-------|--------|------------|------------------------------------|---------------------------------------------------------------------------------------------------------------------------------|
|       |        | Q96T25     | ZIC5                               | Zic family member 5                                                                                                             |
|       |        | Q9HA38     | ZMAT3                              | zinc finger matrin-type 3                                                                                                       |
|       |        | Q5VZL5     | ZMYM4                              | zinc finger MYM-type containing 4                                                                                               |
|       |        | Q14587     | ZNF268                             | zinc finger protein 268                                                                                                         |
|       |        | Q86UD4     | ZNF329                             | zinc finger protein 329                                                                                                         |
|       |        | Q9BUY5     | ZNF426                             | zinc finger protein 426                                                                                                         |
|       |        | Q9ULD9     | ZNF608                             | zinc finger protein 608                                                                                                         |
|       |        | A8MWA4     | ZNF705E                            | zinc finger protein 705E                                                                                                        |
|       |        | P17019     | ZNF708                             | zinc finger protein 708                                                                                                         |
|       |        | P51504     | ZNF80                              | zinc finger protein 80                                                                                                          |
|       |        | Q2TB10     | ZNF800                             | zinc finger protein 800                                                                                                         |
|       |        | P51523     | ZNF84                              | zinc finger protein 84                                                                                                          |
|       |        | Q16670     | ZSCAN26                            | zinc finger and SCAN domain containing 26                                                                                       |
|       |        | P26378     | ELAVL4                             | Eukaryotic translation initiation factor 3 subunit M (eIF3m) (Fetal lung protein B5) (hFL-B5) (PCI domain-containing protein 1) |
|       |        | TargetScan | miR-375<br>Upregulated 24<br>hours | Q92870                                                                                                                          |
| miRDB | O15265 | ATXN7      |                                    | ataxin 7                                                                                                                        |
|       | Q9NXV6 | CDKN2AIP   |                                    | CDKN2A interacting protein                                                                                                      |
|       | Q9NSP4 | CENPM      |                                    | centromere protein M                                                                                                            |
|       | A8K830 | COLCA2     |                                    | colorectal cancer associated 2                                                                                                  |
|       | Q9NS37 | CREBZF     |                                    | CREB/ATF bZIP transcription factor                                                                                              |
|       | Q9Y2E4 | DIP2C      |                                    | disco interacting protein 2 homolog C                                                                                           |
|       | P26378 | ELAVL4     |                                    | ELAV like RNA binding protein 4                                                                                                 |
|       | Q9H4A6 | GOLPH3     |                                    | golgi phosphoprotein 3                                                                                                          |
|       | P35680 | HNF1B      |                                    | HNF1 homeobox B                                                                                                                 |
|       | P31249 | HOXD3      |                                    | homeobox D3                                                                                                                     |
|       | Q6ZRS4 | ITPRID1    |                                    | ITPR interacting domain containing 1                                                                                            |

|  |        |         |                                                                              |
|--|--------|---------|------------------------------------------------------------------------------|
|  | Q14722 | KCNAB1  | potassium voltage-gated channel subfamily A member regulatory beta subunit 1 |
|  | Q13887 | KLF5    | Kruppel like factor 5                                                        |
|  | P07195 | LDHB    | lactate dehydrogenase B                                                      |
|  | Q99677 | LPAR4   | lysophosphatidic acid receptor 4                                             |
|  | Q15546 | MMD     | monocyte to macrophage differentiation associated                            |
|  | Q8N387 | MUC15   | mucin 15, cell surface associated                                            |
|  | Q14938 | NFIX    | nuclear factor I X                                                           |
|  | Q9HB20 | PLEKHA3 | pleckstrin homology domain containing A3                                     |
|  | Q8TC44 | POC1B   | POC1 centriolar protein B                                                    |
|  | Q03052 | POU3F1  | POU class 3 homeobox 1                                                       |
|  | Q96PU8 | QKI     | QKI, KH domain containing RNA binding                                        |
|  | Q06330 | RBPJ    | recombination signal binding protein for immunoglobulin kappa J region       |
|  | Q13129 | RLF     | rearranged L-myc fusion                                                      |
|  | Q8WU17 | RNF139  | ring finger protein 139                                                      |
|  | Q15436 | SEC23A  | Sec23 homolog A, coat complex II component                                   |
|  | P36021 | SLC16A2 | solute carrier family 16 member 2                                            |
|  | O75159 | SOCS5   | suppressor of cytokine signaling 5                                           |
|  | O60271 | SPAG9   | sperm associated antigen 9                                                   |
|  | Q1W4C9 | SPINK13 | serine peptidase inhibitor, Kazal type 13 (putative)                         |
|  | Q08629 | SPOCK1  | SPARC (osteonectin), cwcv and kazal like domains proteoglycan 1              |
|  | Q92574 | TSC1    | TSC complex subunit 1                                                        |
|  | Q05086 | UBE3A   | ubiquitin protein ligase E3A                                                 |
|  | Q8NFA0 | USP32   | ubiquitin specific peptidase 32                                              |
|  | Q9NX94 | WBP1L   | WW domain binding protein 1 like                                             |
|  | Q6GPH4 | XAF1    | XIAP associated factor 1                                                     |
|  | Q9HC78 | ZBTB20  | zinc finger and BTB domain containing 20                                     |

|            |                                      |        |          |                                                                                                                                                                     |
|------------|--------------------------------------|--------|----------|---------------------------------------------------------------------------------------------------------------------------------------------------------------------|
| TargetScan | miR-505-5p<br>Upregulated 6<br>hours | P47974 | ZFP36L2  | ZFP36 ring finger protein like 2                                                                                                                                    |
|            |                                      | Q15915 | ZIC1     | Zic family member 1                                                                                                                                                 |
|            |                                      | Q709F0 | ACAD11   | Acyl-CoA dehydrogenase family member 11 (ACAD-11) (EC 1.3.8.-)                                                                                                      |
|            |                                      | Q96B36 | AKT1S1   | Proline-rich AKT1 substrate 1 (40 kDa proline-rich AKT substrate)                                                                                                   |
|            |                                      | Q6NS38 | ALKBH2   | DNA oxidative demethylase ALKBH2 (EC 1.14.11.33) (Alkylated DNA repair protein alkB homolog 2) (Alpha-ketoglutarate-dependent dioxygenase alkB homolog 2) (Oxy DC1) |
|            |                                      | Q8N9V6 | ANKRD53  | Ankyrin repeat domain-containing protein 53                                                                                                                         |
|            |                                      | E5RJM6 | ANKRD65  | Ankyrin repeat domain-containing protein 65                                                                                                                         |
|            |                                      | Q9UH17 | APOBEC3B | DNA dC->dU-editing enzyme APOBEC-3B (A3B) (EC 3.5.4.38) (Phorbolin-1-related protein) (Phorbolin-2/3)                                                               |
|            |                                      | O14520 | AQP7     | Aquaporin-7 (AQP-7) (Aquaglyceroporin-7) (Aquaporin adipose) (AQPap) (Aquaporin-7-like)                                                                             |
|            |                                      | P0C7U1 | ASAH2B   | Putative inactive neutral ceramidase B (ASAH2-like protein) (Putative inactive N-acylsphingosine amidohydrolase 2B) (Putative inactive non-lysosomal ceramidase B)  |
|            |                                      | Q8NHE4 | ATP6V0E2 | V-type proton ATPase subunit e 2 (V-ATPase subunit e 2) (Lysosomal 9 kDa H(+)-transporting ATPase V0 subunit e2) (Vacuolar proton pump subunit e 2)                 |
|            |                                      | O75531 | BANF1    | Barrier-to-autointegration factor (Breakpoint cluster region protein 1) [Cleaved into: Barrier-to-autointegration factor, N-terminally processed]                   |
|            |                                      | Q6QNY0 | BLOC1S3  | Biogenesis of lysosome-related organelles complex 1 subunit 3 (BLOC-1 subunit 3)                                                                                    |
|            |                                      | Q9NYX4 | CALY     | Neuron-specific vesicular protein calcyon                                                                                                                           |
|            |                                      | O94983 | CAMTA2   | Calmodulin-binding transcription activator 2                                                                                                                        |
|            |                                      | Q8WWF8 | CAPSL    | Calcyphosin-like protein                                                                                                                                            |

|  |  |        |          |                                                                                                                                                                                                                                                                                          |
|--|--|--------|----------|------------------------------------------------------------------------------------------------------------------------------------------------------------------------------------------------------------------------------------------------------------------------------------------|
|  |  | Q9UIB8 | CD84     | SLAM family member 5 (Cell surface antigen MAX.3) (Hly9-beta) (Leukocyte differentiation antigen CD84) (Signaling lymphocytic activation molecule 5) (CD antigen CD84)                                                                                                                   |
|  |  | Q00535 | CDK5     | Cyclin-dependent-like kinase 5 (EC 2.7.11.1) (Cell division protein kinase 5) (Serine/threonine-protein kinase PSSALRE) (Tau protein kinase II catalytic subunit) (TPKII catalytic subunit)                                                                                              |
|  |  | Q96T59 | CDRT15   | CMT1A duplicated region transcript 15 protein                                                                                                                                                                                                                                            |
|  |  | A8MXV6 | CDRT15L2 | CMT1A duplicated region transcript 15 protein-like protein                                                                                                                                                                                                                               |
|  |  | Q4G0U5 | CFAP221  | Cilia- and flagella-associated protein 221 (Primary ciliary dyskinesia protein 1)                                                                                                                                                                                                        |
|  |  | P0CG37 | CFC1     | Cryptic protein (Cryptic family protein 1)                                                                                                                                                                                                                                               |
|  |  | P0CG36 | CFC1B    | Cryptic family protein 1B                                                                                                                                                                                                                                                                |
|  |  | Q9GZX3 | CHST6    | Carbohydrate sulfotransferase 6 (EC 2.8.2.-) (Corneal N-acetylglucosamine-6-O-sulfotransferase) (C-GlcNAc6ST) (hCGn6ST) (Galactose/N-acetylglucosamine/N-acetylglucosamine 6-O-sulfotransferase 4-beta) (GST4-beta) (N-acetylglucosamine 6-O-sulfotransferase 5) (GlcNAc6ST-5) (Gn6st-5) |
|  |  | P0C7P0 | CISD3    | CDGSH iron-sulfur domain-containing protein 3, mitochondrial (MitoNEET-related protein 2) (Miner2) (Mitochondrial inner NEET protein) (MiNT)                                                                                                                                             |
|  |  | O95484 | CLDN9    | Claudin-9                                                                                                                                                                                                                                                                                |
|  |  | Q6UVW9 | CLEC2A   | C-type lectin domain family 2 member A (Keratinocyte-associated C-type lectin) (KACL) (Proliferation-induced lymphocyte-associated receptor) (PILAR)                                                                                                                                     |
|  |  | Q6YFQ2 | COX6B2   | Cytochrome c oxidase subunit 6B2 (Cancer/testis antigen 59) (CT59) (Cytochrome c oxidase subunit VIb isoform 2) (COX VIb-2) (Cytochrome c oxidase subunit VIb, testis-specific isoform)                                                                                                  |



|  |        |          |                                                                                                                                                                                                                                              |
|--|--------|----------|----------------------------------------------------------------------------------------------------------------------------------------------------------------------------------------------------------------------------------------------|
|  | Q32M00 | Crebl2   | cAMP-responsive element-binding protein-like 2                                                                                                                                                                                               |
|  | Q75629 | CREG1    | Protein CREG1 (Cellular repressor of E1A-stimulated genes 1)                                                                                                                                                                                 |
|  | Q6Q6R5 | CRIP3    | Cysteine-rich protein 3 (CRP-3) (Chromosome 6 LIM domain only protein) (h6LIMo)                                                                                                                                                              |
|  | Q8N8Q1 | CYB561D1 | Cytochrome b561 domain-containing protein 1                                                                                                                                                                                                  |
|  | P32321 | DCTD     | Deoxycytidylate deaminase (EC 3.5.4.12) (dCMP deaminase)                                                                                                                                                                                     |
|  | Q18PE1 | DOK7     | Protein Dok-7 (Downstream of tyrosine kinase 7)                                                                                                                                                                                              |
|  | Q6P2I7 | EBLN2    | Endogenous Bornavirus-like nucleoprotein 2 (Endogenous Borna-like N element-2) (EBLN-2)                                                                                                                                                      |
|  | Q96G04 | EEF2KMT  | Protein-lysine N-methyltransferase EEF2KMT (EC 2.1.1.-) (eEF2-lysine methyltransferase) (eEF2-KMT)                                                                                                                                           |
|  | Q9UKW6 | ELF5     | ETS-related transcription factor Elf-5 (E74-like factor 5) (Epithelium-restricted ESE-1-related Ets factor) (Epithelium-specific Ets transcription factor 2) (ESE-2)                                                                         |
|  | Q6UWT2 | ENHO     | Adropin (Energy homeostasis-associated protein)                                                                                                                                                                                              |
|  | Q8N3H0 | FAM19A2  |                                                                                                                                                                                                                                              |
|  | Q9NVL1 | FAM86C1  | Protein FAM86C1 (EC 2.1.1.-) (Protein FAM86C)                                                                                                                                                                                                |
|  | Q9NXK8 | FBXL12   | F-box/LRR-repeat protein 12 (F-box and leucine-rich repeat protein 12) (F-box protein FBL12)                                                                                                                                                 |
|  | Q9BVA6 | FICD     | Protein adenylyltransferase FICD (EC 2.7.7.n1) (AMPylator FICD) (De-AMPylase FICD) (EC 3.1.4.-) (FIC domain-containing protein) (Huntingtin yeast partner E) (Huntingtin-interacting protein 13) (HIP-13) (Huntingtin-interacting protein E) |
|  | Q96CU9 | FOXRED1  | FAD-dependent oxidoreductase domain-containing protein 1 (EC 1.-.-.-)                                                                                                                                                                        |
|  | Q96C23 | GALM     | Aldose 1-epimerase (EC 5.1.3.3) (Galactose mutarotase)                                                                                                                                                                                       |

|  |        |          |                                                                                                                                                                                                                  |
|--|--------|----------|------------------------------------------------------------------------------------------------------------------------------------------------------------------------------------------------------------------|
|  | Q8WTR4 | GDPD5    | Glycerophosphodiester phosphodiesterase domain-containing protein 5 (EC 3.1.4.11) (Glycerophosphodiester phosphodiesterase 2)                                                                                    |
|  | Q9BZE0 | GLIS2    | Zinc finger protein GLIS2 (GLI-similar 2) (Neuronal Krueppel-like protein)                                                                                                                                       |
|  | Q8WP90 | Gp-9     | G-protein coupled receptor 26                                                                                                                                                                                    |
|  | Q8NDV2 | GPR26    |                                                                                                                                                                                                                  |
|  | Q00960 | Grin2b   | Glutamate receptor ionotropic, NMDA 2B (GluN2B) (Glutamate [NMDA] receptor subunit epsilon-2) (N-methyl D-aspartate receptor subtype 2B) (NMDAR2B) (NR2B) (N-methyl-D-aspartate receptor subunit 3) (NR3) (hNR3) |
|  | Q9Y2Q3 | GSTK1    | Glutathione S-transferase kappa 1 (EC 2.5.1.18) (GST 13-13) (GST class-kappa) (GSTK1-1) (hGSTK1) (Glutathione S-transferase subunit 13)                                                                          |
|  | Q9Y5R4 | HEMK1    | MTRF1L release factor glutamine methyltransferase (EC 2.1.1.297) (HemK methyltransferase family member 1) (M.HsaHemKP)                                                                                           |
|  | P04440 | HLA-DPB1 | HLA class II histocompatibility antigen, DP beta 1 chain (HLA class II histocompatibility antigen, DP(W4) beta chain) (MHC class II antigen DPB1)                                                                |
|  | Q30154 | HLA-DRB5 | HLA class II histocompatibility antigen, DR beta 5 chain (DR beta-5) (DR2-beta-2) (Dw2) (MHC class II antigen DRB5)                                                                                              |
|  | P29460 | IL12B    | Interleukin-12 subunit beta (IL-12B) (Cytotoxic lymphocyte maturation factor 40 kDa subunit) (CLMF p40) (IL-12 subunit p40) (NK cell stimulatory factor chain 2) (NKSF2)                                         |
|  | Q9ULR0 | ISY1     | Pre-mRNA-splicing factor ISY1 homolog                                                                                                                                                                            |
|  | Q6ZU35 | KIAA1211 |                                                                                                                                                                                                                  |
|  | P62502 | LCN6     | Epididymal-specific lipocalin-6 (Lipocalin-5)                                                                                                                                                                    |
|  | Q96DT0 | LGALS12  | Galectin-12 (Gal-12) (Galectin-related inhibitor of proliferation)                                                                                                                                               |

|  |        |         |                                                                                                                                                                                                                                                                            |
|--|--------|---------|----------------------------------------------------------------------------------------------------------------------------------------------------------------------------------------------------------------------------------------------------------------------------|
|  | O95867 | LY6G6C  | Lymphocyte antigen 6 complex locus protein G6c                                                                                                                                                                                                                             |
|  | Q9H063 | MAF1    | Repressor of RNA polymerase III transcription MAF1 homolog                                                                                                                                                                                                                 |
|  | Q8IVH8 | MAP4K3  | Mitogen-activated protein kinase kinase kinase 3 (EC 2.7.11.1) (Germinal center kinase-related protein kinase) (GLK) (MAPK/ERK kinase kinase 3) (MEK kinase kinase 3) (MEKKK 3)                                                                                            |
|  | P14174 | MIF     | Macrophage migration inhibitory factor (MIF) (EC 5.3.2.1) (Glycosylation-inhibiting factor) (GIF) (L-dopachrome isomerase) (L-dopachrome tautomerase) (EC 5.3.3.12) (Phenylpyruvate tautomerase)                                                                           |
|  | Q95460 | MR1     | Major histocompatibility complex class I-related gene protein (MHC class I-related gene protein) (Class I histocompatibility antigen-like protein)                                                                                                                         |
|  | Q8IXM3 | MRPL41  | 39S ribosomal protein L41, mitochondrial (L41mt) (MRP-L41) (39S ribosomal protein L27 homolog) (Bcl-2-interacting mitochondrial ribosomal protein L41) (Cell proliferation-inducing gene 3 protein) (MRP-L27 homolog) (Mitochondrial large ribosomal subunit protein mL41) |
|  | O15235 | MRPS12  | 28S ribosomal protein S12, mitochondrial (MRP-S12) (S12mt) (MT-RPS12) (Mitochondrial small ribosomal subunit protein uS12m)                                                                                                                                                |
|  | Q96EZ4 | MYEOV   | Myeloma-overexpressed gene protein (Oncogene in multiple myeloma)                                                                                                                                                                                                          |
|  | Q9NP98 | MYOZ1   | Myozenin-1 (Calsarcin-2) (Filamin-, actinin- and telethonin-binding protein) (Protein FATZ)                                                                                                                                                                                |
|  | Q92692 | NECTIN2 | Nectin-2 (Herpes virus entry mediator B) (Herpesvirus entry mediator B) (HveB) (Nectin cell adhesion molecule 2) (Poliovirus receptor-related protein 2) (CD antigen CD112)                                                                                                |
|  | Q9Y3C1 | NOP16   | Nucleolar protein 16 (HBV pre-S2 trans-regulated protein 3)                                                                                                                                                                                                                |
|  | Q96PH1 | NOX5    | NADPH oxidase 5 (EC 1.6.3.-)                                                                                                                                                                                                                                               |

|  |  |        |         |                                                                                                                                                        |
|--|--|--------|---------|--------------------------------------------------------------------------------------------------------------------------------------------------------|
|  |  | Q9Y328 | NSG2    | Neuronal vesicle trafficking-associated protein 2 (Neuron-specific protein family member 2) (Protein p19) (Hmp19)                                      |
|  |  | P49902 | NT5C2   | Cytosolic purine 5'-nucleotidase (EC 3.1.3.5) (Cytosolic 5'-nucleotidase II)                                                                           |
|  |  | P30954 | OR10J1  | Olfactory receptor 10J1 (Olfactory receptor OR1-26) (Olfactory receptor-like protein HGMP07J)                                                          |
|  |  | Q9HC10 | OTOF    | Otoferlin (Fer-1-like protein 2)                                                                                                                       |
|  |  | Q8WXA2 | PATE1   | Prostate and testis expressed protein 1                                                                                                                |
|  |  | P39877 | PLA2G5  | Calcium-dependent phospholipase A2 (EC 3.1.1.4) (Group V phospholipase A2) (PLA2-10) (Phosphatidylcholine 2-acylhydrolase 5)                           |
|  |  | P24158 | PRTN3   | Myeloblastin (EC 3.4.21.76) (AGP7) (C-ANCA antigen) (Leukocyte proteinase 3) (PR-3) (PR3) (Neutrophil proteinase 4) (NP-4) (P29) (Wegener autoantigen) |
|  |  | Q9Z1X2 | Ptdss2  | Phosphatidylserine synthase 2 (PSS-2) (PtdSer synthase 2) (EC 2.7.8.29) (Serine-exchange enzyme II)                                                    |
|  |  | E9PB15 | PTGES3L | Putative protein PTGES3L (Prostaglandin E synthase 3-like)                                                                                             |
|  |  | P49190 | PTH2R   | Parathyroid hormone 2 receptor (PTH2 receptor)                                                                                                         |
|  |  | Q96A99 | PTX4    | Pentraxin-4                                                                                                                                            |
|  |  | Q8K459 | Pxt1    | Peroxisomal testis-specific protein 1 (Small testis-specific peroxisomal protein)                                                                      |
|  |  | Q9H2L5 | RASSF4  | Ras association domain-containing protein 4                                                                                                            |
|  |  | Q8TAI7 | RHEBL1  | GTPase RhebL1 (Ras homolog enriched in brain like-1 c) (RhebL1c) (Ras homolog enriched in brain-like protein 1) (Rheb-like protein 1) (Rheb2)          |
|  |  | P08134 | RHOC    | Rho-related GTP-binding protein RhoC (Rho cDNA clone 9) (h9)                                                                                           |
|  |  | P39019 | RPS19   | 40S ribosomal protein S19 (Small ribosomal subunit protein eS19)                                                                                       |

|  |  |        |         |                                                                                                                                                                                                                                              |
|--|--|--------|---------|----------------------------------------------------------------------------------------------------------------------------------------------------------------------------------------------------------------------------------------------|
|  |  | Q5SSQ6 | SAPCD1  | Suppressor APC domain-containing protein 1 (Protein G7d)                                                                                                                                                                                     |
|  |  | Q9H7N4 | SCAF1   | Splicing factor, arginine/serine-rich 19 (SR-related C-terminal domain-associated factor 1) (SR-related and CTD-associated factor 1) (SR-related-CTD-associated factor) (SCAF) (Serine arginine-rich pre-mRNA splicing factor SR-A1) (SR-A1) |
|  |  | Q9NZV5 | SELENON | Selenoprotein N (SelN)                                                                                                                                                                                                                       |
|  |  | Q9NR46 | SH3GLB2 | Endophilin-B2 (SH3 domain-containing GRB2-like protein B2)                                                                                                                                                                                   |
|  |  | O15389 | SIGLEC5 | Sialic acid-binding Ig-like lectin 5 (Siglec-5) (CD33 antigen-like 2) (Obesity-binding protein 2) (OB-BP2) (OB-binding protein 2) (CD antigen CD170)                                                                                         |
|  |  | Q9P1W8 | SIRPG   | Signal-regulatory protein gamma (SIRP-gamma) (CD172 antigen-like family member B) (Signal-regulatory protein beta-2) (SIRP-b2) (SIRP-beta-2) (CD antigen CD172g)                                                                             |
|  |  | Q9NQ25 | SLAMF7  | SLAM family member 7 (CD2 subset 1) (CD2-like receptor-activating cytotoxic cells) (CRACC) (Membrane protein FOAP-12) (Novel Ly9) (Protein 19A) (CD antigen CD319)                                                                           |
|  |  | Q9BYW1 | SLC2A11 | Solute carrier family 2, facilitated glucose transporter member 11 (Glucose transporter type 11) (GLUT-11)                                                                                                                                   |
|  |  | P22732 | SLC2A5  | Solute carrier family 2, facilitated glucose transporter member 5 (Fructose transporter) (Glucose transporter type 5, small intestine) (GLUT-5)                                                                                              |
|  |  | P03973 | SLPI    | Antileukoproteinase (ALP) (BLPI) (HUSI-1) (Mucus proteinase inhibitor) (MPI) (Protease inhibitor WAP4) (Secretory leukocyte protease inhibitor) (Seminal proteinase inhibitor) (WAP four-disulfide core domain protein 4)                    |
|  |  | P55000 | SLURP1  | Secreted Ly-6/uPAR-related protein 1 (SLURP-1) (ARS component B) (ARS(component B)-81/S) (Anti-neoplastic urinary protein) (ANUP)                                                                                                            |

|  |        |           |                                                                                                                                                                                                                                                                                             |
|--|--------|-----------|---------------------------------------------------------------------------------------------------------------------------------------------------------------------------------------------------------------------------------------------------------------------------------------------|
|  | Q0VAQ4 | SMAGP     | Small cell adhesion glycoprotein (Small transmembrane and glycosylated protein)                                                                                                                                                                                                             |
|  | P0DI80 | SMIM6     | Small integral membrane protein 6                                                                                                                                                                                                                                                           |
|  | Q53HV7 | SMUG1     | Single-strand selective monofunctional uracil DNA glycosylase (EC 3.2.2.-)                                                                                                                                                                                                                  |
|  | O75971 | SNAPC5    | snRNA-activating protein complex subunit 5 (SNAPc subunit 5) (Small nuclear RNA-activating complex polypeptide 5) (snRNA-activating protein complex 19 kDa subunit) (SNAPc 19 kDa subunit)                                                                                                  |
|  | Q13425 | SNTB2     | Beta-2-syntrophin (59 kDa dystrophin-associated protein A1 basic component 2) (Syntrophin-3) (SNT3) (Syntrophin-like) (SNTL)                                                                                                                                                                |
|  | Q9Y675 | SNURF     | SNRPN upstream reading frame protein                                                                                                                                                                                                                                                        |
|  | Q04888 | Sox10     | Transcription factor SOX-10                                                                                                                                                                                                                                                                 |
|  | Q9UNL2 | SSR3      | Translocon-associated protein subunit gamma (TRAP-gamma) (Signal sequence receptor subunit gamma) (SSR-gamma)                                                                                                                                                                               |
|  | O43173 | ST8SIA3   | Sia-alpha-2,3-Gal-beta-1,4-GlcNAc-R:alpha 2,8-sialyltransferase (EC 2.4.99.-) (Alpha-2,8-sialyltransferase 8C) (Alpha-2,8-sialyltransferase III) (ST8 alpha-N-acetyl-neuraminide alpha-2,8-sialyltransferase 3) (Sialyltransferase 8C) (SIAT8-C) (Sialyltransferase St8Sia III) (ST8SiaIII) |
|  | P26639 | TARS      | Threonine--tRNA ligase 1, cytoplasmic (EC 6.1.1.3) (Threonyl-tRNA synthetase) (ThrRS) (Threonyl-tRNA synthetase 1)                                                                                                                                                                          |
|  | Q96PF1 | TGM7      | Protein-glutamine gamma-glutamyltransferase Z (Transglutaminase Z) (TG(Z)) (TGZ) (TGase Z) (EC 2.3.2.13) (Transglutaminase-7) (TGase-7)                                                                                                                                                     |
|  | C9JI98 | TMEM238   | Transmembrane protein 238                                                                                                                                                                                                                                                                   |
|  | Q8K288 | Tnfaip8l1 | Tumor necrosis factor alpha-induced protein 8-like protein 1 (TIPE1) (TNF alpha-induced protein 8-like protein 1)                                                                                                                                                                           |

|       |        |           |                                                                                                                                                                                                                                                                                      |
|-------|--------|-----------|--------------------------------------------------------------------------------------------------------------------------------------------------------------------------------------------------------------------------------------------------------------------------------------|
| miRDB |        |           | (TNFAIP8-like protein 1) (Oxidative stress-regulated gene-beta) (Oxy-beta)                                                                                                                                                                                                           |
|       | Q9NP84 | TNFRSF12A | Tumor necrosis factor receptor superfamily member 12A (Fibroblast growth factor-inducible immediate-early response protein 14) (FGF-inducible 14) (Tweak-receptor) (TweakR) (CD antigen CD266)                                                                                       |
|       | O95150 | TNFSF15   | Tumor necrosis factor ligand superfamily member 15 (TNF ligand-related molecule 1) (Vascular endothelial cell growth inhibitor) [Cleaved into: Tumor necrosis factor ligand superfamily member 15, membrane form; Tumor necrosis factor ligand superfamily member 15, secreted form] |
|       | Q15025 | TNIP1     | TNFAIP3-interacting protein 1 (A20-binding inhibitor of NF-kappa-B activation 1) (ABIN-1) (HIV-1 Nef-interacting protein) (Nef-associated factor 1) (Naf1) (Nip40-1) (Virion-associated nuclear shuttling protein) (VAN) (hVAN)                                                      |
|       | Q9HCN2 | TP53AIP1  | p53-regulated apoptosis-inducing protein 1 (p53AIP1)                                                                                                                                                                                                                                 |
|       | Q8NEE8 | TTC16     | Tetratricopeptide repeat protein 16 (TPR repeat protein 16)                                                                                                                                                                                                                          |
|       | Q8NA23 | WDR31     | WD repeat-containing protein 31                                                                                                                                                                                                                                                      |
|       | Q93097 | WNT2B     | Protein Wnt-2b (Protein Wnt-13)                                                                                                                                                                                                                                                      |
|       | Q7L2R6 | ZNF765    | Zinc finger protein 765                                                                                                                                                                                                                                                              |
|       | Q2QGD7 | ZXDC      | Zinc finger protein ZXDC (ZXD-like zinc finger protein)                                                                                                                                                                                                                              |
|       | Q709F0 | ACAD11    | acyl-CoA dehydrogenase family member 11                                                                                                                                                                                                                                              |
|       | Q96B36 | AKT1S1    | AKT1 substrate 1                                                                                                                                                                                                                                                                     |
|       | Q9UH17 | APOBEC3B  | apolipoprotein B mRNA editing enzyme catalytic subunit 3B                                                                                                                                                                                                                            |
|       | Q8NHH9 | ATL2      | atlastin GTPase 2                                                                                                                                                                                                                                                                    |
|       | P14415 | ATP1B2    | ATPase Na <sup>+</sup> /K <sup>+</sup> transporting subunit beta 2                                                                                                                                                                                                                   |
|       | Q9NTI2 | ATP8A2    | ATPase phospholipid transporting 8A2                                                                                                                                                                                                                                                 |
|       | O75531 | BANF1     | barrier to autointegration factor 1                                                                                                                                                                                                                                                  |

|        |         |                                                            |
|--------|---------|------------------------------------------------------------|
| Q6UWT4 | C5orf46 | chromosome 5 open reading frame 46                         |
| O15484 | CAPN5   | calpain 5                                                  |
| Q8WWF8 | CAPSL   | calcyphosine like                                          |
| Q00535 | CDK5    | cyclin dependent kinase 5                                  |
| Q6UVW9 | CLEC2A  | C-type lectin domain family 2 member A                     |
| O60519 | CREBL2  | cAMP responsive element binding protein like 2             |
| O75629 | CREG1   | cellular repressor of E1A stimulated genes 1               |
| Q15700 | DLG2    | discs large MAGUK scaffold protein 2                       |
| P07992 | ERCC1   | ERCC excision repair 1, endonuclease non-catalytic subunit |
| P50395 | GDI2    | GDP dissociation inhibitor 2                               |
| Q9BZE0 | GLIS2   | GLIS family zinc finger 2                                  |
| P09471 | GNAO1   | G protein subunit alpha o1                                 |
| Q8NDV2 | GPR26   | G protein-coupled receptor 26                              |
| O60381 | HBP1    | HMG-box transcription factor 1                             |
| O43365 | HOXA3   | homeobox A3                                                |
| P11279 | LAMP1   | lysosomal associated membrane protein 1                    |
| Q9P1T7 | MDFIC   | MyoD family inhibitor domain containing                    |
| P51608 | MECP2   | methyl-CpG binding protein 2                               |
| Q9Y5R2 | MMP24   | matrix metalloproteinase 24                                |
| Q95460 | MR1     | major histocompatibility complex, class I-related          |
| Q6NW34 | NEPRO   | nucleolus and neural progenitor protein                    |
| Q9Y328 | NSG2    | neuronal vesicle trafficking associated 2                  |
| P49902 | NT5C2   | 5'-nucleotidase, cytosolic II                              |
| Q9BZ71 | PITPNM3 | PITPNM family member 3                                     |
| Q9HBU9 | POPDC2  | popeye domain containing 2                                 |
| O00231 | PSMD11  | proteasome 26S subunit, non-ATPase 11                      |
| Q8NFP0 | PXT1    | peroxisomal testis enriched protein 1                      |
| P20337 | RAB7B   | RAB7B, member RAS oncogene family                          |
| P13631 | RARG    | retinoic acid receptor gamma                               |



|            |                                         |        |          |                                                                                                                                                                 |
|------------|-----------------------------------------|--------|----------|-----------------------------------------------------------------------------------------------------------------------------------------------------------------|
|            |                                         | Q86VR2 | RETREG3  | reticulophagy regulator family member 3                                                                                                                         |
|            |                                         | Q5SSQ6 | SAPCD1   | suppressor APC domain containing 1                                                                                                                              |
|            |                                         | O75056 | SDC3     | syndecan 3                                                                                                                                                      |
|            |                                         | Q9P0U3 | SEN1     | SUMO specific peptidase 1                                                                                                                                       |
|            |                                         | P07988 | SFTP8    | surfactant protein B                                                                                                                                            |
|            |                                         | O15389 | SIGLEC5  | sialic acid binding Ig like lectin 5                                                                                                                            |
|            |                                         | Q9NQ25 | SLAMF7   | SLAM family member 7                                                                                                                                            |
|            |                                         | P22732 | SLC2A5   | solute carrier family 2 member 5                                                                                                                                |
|            |                                         | Q9ULF5 | SLC39A10 | solute carrier family 39 member 10                                                                                                                              |
|            |                                         | P57103 | SLC8A3   | solute carrier family 8 member A3                                                                                                                               |
|            |                                         | Q0VAQ4 | SMAGP    | small cell adhesion glycoprotein                                                                                                                                |
|            |                                         | Q92922 | SMARCC1  | SWI/SNF related, matrix associated, actin dependent regulator of chromatin subfamily c member 1                                                                 |
|            |                                         | Q11201 | ST3GAL1  | ST3 beta-galactoside alpha-2,3-sialyltransferase 1                                                                                                              |
|            |                                         | O43173 | ST8SIA3  | ST8 alpha-N-acetyl-neuraminide alpha-2,8-sialyltransfe                                                                                                          |
|            |                                         | Q9BQS2 | SYT15    | synaptotagmin 15                                                                                                                                                |
|            |                                         | Q96PF1 | TGM7     | transglutaminase 7                                                                                                                                              |
|            |                                         | Q9BTF0 | THUMP2   | THUMP domain containing 2                                                                                                                                       |
|            |                                         | Q15025 | TNIP1    | TNFAIP3 interacting protein 1                                                                                                                                   |
|            |                                         | Q9HCF6 | TRPM3    | transient receptor potential cation channel subfamily M member 3                                                                                                |
|            |                                         | Q86VN1 | VPS36    | vacuolar protein sorting 36 homolog                                                                                                                             |
|            |                                         | Q8N966 | ZDHHC22  | zinc finger DHHC-type containing 22                                                                                                                             |
|            |                                         | Q5VUY2 | AADACL4  | Arylacetamide deacetylase-like 4 (EC 3.1.1.-)                                                                                                                   |
| TargetScan | miR-512-3p<br>Downregulated 24<br>hours | P50052 | AGTR2    | Type-2 angiotensin II receptor (Angiotensin II type-2 receptor) (AT2)                                                                                           |
|            |                                         | O43572 | AKAP10   | A-kinase anchor protein 10, mitochondrial (AKAP-10) (Dual specificity A kinase-anchoring protein 2) (D-AKAP-2) (Protein kinase A-anchoring protein 10) (PRKA10) |

|  |        |            |                                                                                                                                                                                                                                                                                                                        |
|--|--------|------------|------------------------------------------------------------------------------------------------------------------------------------------------------------------------------------------------------------------------------------------------------------------------------------------------------------------------|
|  | Q9H8T0 | AKTIP      | AKT-interacting protein (Ft1) (Fused toes protein homolog)                                                                                                                                                                                                                                                             |
|  | Q96PC3 | AP1S3      | AP-1 complex subunit sigma-3 (Adaptor protein complex AP-1 subunit sigma-1C) (Adaptor-related protein complex 1 subunit sigma-1C) (Clathrin assembly protein complex 1 sigma-1C small chain) (Golgi adaptor HA1/AP1 adaptin sigma-1C subunit) (Sigma 1C subunit of AP-1 clathrin) (Sigma-adaptin 1C) (Sigma1C-adaptin) |
|  | Q96KC2 | ARL5B      | ADP-ribosylation factor-like protein 5B (ADP-ribosylation factor-like protein 8)                                                                                                                                                                                                                                       |
|  | Q16204 | CCDC6      | Coiled-coil domain-containing protein 6                                                                                                                                                                                                                                                                                |
|  | Q9UNH5 | CDC14A     | Dual specificity protein phosphatase CDC14A                                                                                                                                                                                                                                                                            |
|  | Q8IVW4 | CDKL3      | Cyclin-dependent kinase-like 3                                                                                                                                                                                                                                                                                         |
|  | Q9NXV6 | CDKN2AIP   | CDKN2A-interacting protein                                                                                                                                                                                                                                                                                             |
|  | B2RD01 | CENPBD1    | Putative CENPB DNA-binding domain-containing protein 1                                                                                                                                                                                                                                                                 |
|  | Q2UY09 | COL28A1    | Collagen alpha-1(XXVIII) chain                                                                                                                                                                                                                                                                                         |
|  | Q8N6G5 | CSGALNACT2 | Chondroitin sulfate N-acetylgalactosaminyltransferase 2                                                                                                                                                                                                                                                                |
|  | Q9H4G1 | CST9L      | Cystatin-9-like                                                                                                                                                                                                                                                                                                        |
|  | Q9H1C7 | CYSTM1     | Cysteine-rich and transmembrane domain-containing protein 1                                                                                                                                                                                                                                                            |
|  | Q8WTU0 | DDI1       | Protein DDI1 homolog 1                                                                                                                                                                                                                                                                                                 |
|  | Q9Y315 | DERA       | Deoxyribose-phosphate aldolase                                                                                                                                                                                                                                                                                         |
|  | Q8IX18 | DHX40      | Probable ATP-dependent RNA helicase DHX40                                                                                                                                                                                                                                                                              |
|  | Q7Z6W7 | DNAJB7     | DnaJ homolog subfamily B member 7                                                                                                                                                                                                                                                                                      |
|  | Q9NR20 | DYRK4      | Dual specificity tyrosine-phosphorylation-regulated kinase 4                                                                                                                                                                                                                                                           |
|  | O95278 | EPM2A      | Laforin                                                                                                                                                                                                                                                                                                                |
|  | Q6P587 | FAHD1      | Acylpyruvase FAHD1, mitochondrial                                                                                                                                                                                                                                                                                      |
|  | Q1W6H9 | FAM110C    | Protein FAM110C                                                                                                                                                                                                                                                                                                        |
|  | Q5T036 | FAM120AOS  | Uncharacterized protein FAM120AOS                                                                                                                                                                                                                                                                                      |
|  | Q8WU58 | FAM222B    | Protein FAM222B                                                                                                                                                                                                                                                                                                        |

|  |        |          |                                                                                                                                                                                                                                   |
|--|--------|----------|-----------------------------------------------------------------------------------------------------------------------------------------------------------------------------------------------------------------------------------|
|  | Q9UF56 | FBXL17   | F-box/LRR-repeat protein 17 (F-box and leucine-rich repeat protein 17) (F-box only protein 13)                                                                                                                                    |
|  | Q92913 | FGF13    | Fibroblast growth factor 13 (FGF-13) (Fibroblast growth factor homologous factor 2) (FHF-2)                                                                                                                                       |
|  | Q5T0N5 | FNBP1L   | Formin-binding protein 1-like (Transducer of Cdc42-dependent actin assembly protein 1) (Toca-1)                                                                                                                                   |
|  | P19526 | FUT1     | Galactoside 2-alpha-L-fucosyltransferase 1 (EC 2.4.1.344) (Alpha(1,2)FT 1) (Blood group H alpha 2-fucosyltransferase) (Fucosyltransferase 1) (GDP-L-fucose:beta-D-galactoside 2-alpha-L-fucosyltransferase 1)                     |
|  | O43903 | GAS2     | Growth arrest-specific protein 2 (GAS-2)                                                                                                                                                                                          |
|  | Q9NZD2 | GLTP     | Glycolipid transfer protein (GLTP)                                                                                                                                                                                                |
|  | P00492 | HPRT1    | Hypoxanthine-guanine phosphoribosyltransferase (HGPRT) (HGPRTase) (EC 2.4.2.8)                                                                                                                                                    |
|  | Q8IY31 | IFT20    | Intraflagellar transport protein 20 homolog (hIFT20)                                                                                                                                                                              |
|  | Q8N5I3 | KCNRG    | Potassium channel regulatory protein                                                                                                                                                                                              |
|  | B2RXH2 | KDM4E    | Lysine-specific demethylase 4E                                                                                                                                                                                                    |
|  | Q14695 | KIAA0087 | Uncharacterized protein KIAA0087                                                                                                                                                                                                  |
|  | Q96MU8 | KREMEN1  | Kremen protein 1                                                                                                                                                                                                                  |
|  | P35900 | KRT20    | Keratin, type I cytoskeletal 20                                                                                                                                                                                                   |
|  | P26371 | KRTAP5-9 | Keratin-associated protein 5-9 (Keratin, cuticle, ultrahigh sulfur 1) (Keratin, ultra high-sulfur matrix protein A) (Keratin-associated protein 5.9) (UHS keratin A) (UHS KerA) (Ultrahigh sulfur keratin-associated protein 5.9) |
|  | Q96JN0 | LCOR     | Ligand-dependent corepressor (LCoR) (Mblk1-related protein 2)                                                                                                                                                                     |

|  |        |          |                                                                                                                                                                                                                                     |
|--|--------|----------|-------------------------------------------------------------------------------------------------------------------------------------------------------------------------------------------------------------------------------------|
|  | P28482 | MAPK1    | Mitogen-activated protein kinase 1 (MAP kinase 1) (MAPK 1) (EC 2.7.11.24) (ERT1) (Extracellular signal-regulated kinase 2) (ERK-2) (MAP kinase isoform p42) (p42-MAPK) (Mitogen-activated protein kinase 2) (MAP kinase 2) (MAPK 2) |
|  | Q96EN8 | MOCOS    | Molybdenum cofactor sulfurase (MCS) (MOS) (MoCo sulfurase) (hMCS) (EC 2.8.1.9) (Molybdenum cofactor sulfurtransferase)                                                                                                              |
|  | Q86T75 | NBPF11   | Neuroblastoma breakpoint family member 11                                                                                                                                                                                           |
|  | Q9BQ51 | PDCD1LG2 | Programmed cell death 1 ligand 2                                                                                                                                                                                                    |
|  | Q8N165 | PDIK1L   | Serine/threonine-protein kinase PDIK1L                                                                                                                                                                                              |
|  | Q8IZ21 | PHACTR4  | Phosphatase and actin regulator 4                                                                                                                                                                                                   |
|  | Q8WYR1 | PIK3R5   | Phosphoinositide 3-kinase regulatory subunit 5                                                                                                                                                                                      |
|  | Q8WZA1 | POMGNT1  | Protein O-linked-mannose beta-1,2-N-acetylglucosaminyltransferase 1                                                                                                                                                                 |
|  | Q07869 | PPARA    | Peroxisome proliferator-activated receptor alpha                                                                                                                                                                                    |
|  | Q00LT1 | PRCD     | Photoreceptor disk component PRCD                                                                                                                                                                                                   |
|  | P13861 | PRKAR2A  | cAMP-dependent protein kinase type II-alpha regulatory subunit                                                                                                                                                                      |
|  | Q8IV56 | PRR15    | Proline-rich protein 15                                                                                                                                                                                                             |
|  | P20337 | RAB3B    | Ras-related protein Rab-3B                                                                                                                                                                                                          |
|  | P61587 | RND3     | Rho-related GTP-binding protein RhoE                                                                                                                                                                                                |
|  | Q9BXT8 | RNF17    | RING finger protein 17                                                                                                                                                                                                              |
|  | Q7Z769 | SLC35E3  | Solute carrier family 35 member E3                                                                                                                                                                                                  |
|  | O15198 | SMAD2    | Mothers against decapentaplegic homolog 9                                                                                                                                                                                           |
|  | Q16637 | SMN1     | Survival motor neuron protein                                                                                                                                                                                                       |
|  | O43791 | SPOP     | Speckle-type POZ protein                                                                                                                                                                                                            |
|  | Q16384 | SSX1     | Protein SSX1                                                                                                                                                                                                                        |
|  | O60224 | SSX4     | Protein SSX4                                                                                                                                                                                                                        |
|  | Q7RTT5 | SSX7     | Protein SSX7                                                                                                                                                                                                                        |

|       |        |         |                                                                                                                                                                                                                   |
|-------|--------|---------|-------------------------------------------------------------------------------------------------------------------------------------------------------------------------------------------------------------------|
| miRDB | Q92186 | ST8SIA2 | Alpha-2,8-sialyltransferase 8B                                                                                                                                                                                    |
|       | P56279 | TCL1A   | T-cell leukemia/lymphoma protein 1A                                                                                                                                                                               |
|       | P10828 | THRB    | Thyroid hormone receptor beta (Nuclear receptor subfamily 1 group A member 2) (c-erbA-2) (c-erbA-beta)                                                                                                            |
|       | Q96DC7 | TMCO6   | Transmembrane and coiled-coil domain-containing protein 6                                                                                                                                                         |
|       | A2RRL7 | TMEM213 | Transmembrane protein 213                                                                                                                                                                                         |
|       | Q13829 | TNFAIP1 | BTB/POZ domain-containing adapter for CUL3-mediated RhoA degradation protein 2 (hBACURD2) (BTB/POZ domain-containing protein TNFAIP1) (Protein B12) (Tumor necrosis factor, alpha-induced protein 1, endothelial) |
|       | Q9H4B7 | TUBB1   | Tubulin beta-1 chain                                                                                                                                                                                              |
|       | O95164 | UBL3    | Ubiquitin-like protein 3 (Membrane-anchored ubiquitin-fold protein) (HsMUB) (MUB) (Protein HCG-1)                                                                                                                 |
|       | Q9Y6I4 | USP3    | Ubiquitin carboxyl-terminal hydrolase 3 (EC 3.4.19.12) (Deubiquitinating enzyme 3) (Ubiquitin thioesterase 3) (Ubiquitin-specific-processing protease 3)                                                          |
|       | P34547 | usp-46  | Ubiquitin carboxyl-terminal hydrolase 46                                                                                                                                                                          |
|       | Q8TCV5 | WFDC5   | WAP four-disulfide core domain protein 5 (Putative protease inhibitor WAP1) (p53-responsive gene 5 protein)                                                                                                       |
|       | P17014 | ZNF12   | Zinc finger protein 12 (Gonadotropin-inducible ovary transcription repressor 3) (GIOT-3) (Zinc finger protein 325) (Zinc finger protein KOX3)                                                                     |
|       | O14771 | ZNF213  | Zinc finger protein 213 (Putative transcription factor CR53) (Zinc finger protein with KRAB and SCAN domains 21)                                                                                                  |
|       | Q9Y462 | ZNF711  | Zinc finger protein 711 (Zinc finger protein 6)                                                                                                                                                                   |
|       | Q3KNS6 | ZNF829  | Zinc finger protein 829                                                                                                                                                                                           |
|       | Q0P651 | ABHD18  | abhydrolase domain containing 18                                                                                                                                                                                  |
|       | P42684 | ABL2    | ABL proto-oncogene 2, non-receptor tyrosine kinase                                                                                                                                                                |
|       | Q9Y3Q7 | ADAM18  | ADAM metallopeptidase domain 18                                                                                                                                                                                   |

|        |          |                                                              |
|--------|----------|--------------------------------------------------------------|
| P82987 | ADAMTSL3 | ADAMTS like 3                                                |
| Q08828 | ADCY1    | adenylate cyclase 1                                          |
| P50052 | AGTR2    | angiotensin II receptor type 2                               |
| Q09666 | AHNAK    | AHNAK nucleoprotein                                          |
| A9YTQ3 | AHRR     | aryl-hydrocarbon receptor repressor                          |
| Q9H8T0 | AKTIP    | AKT interacting protein                                      |
| O15013 | ARHGEF10 | Rho guanine nucleotide exchange factor 10                    |
| Q8IVW1 | ARL17A   | ADP ribosylation factor like GTPase 17A                      |
| Q96KC2 | ARL5B    | ADP ribosylation factor like GTPase 5B                       |
| P54253 | ATXN1    | ataxin 1                                                     |
| O15265 | ATXN7    | ataxin 7                                                     |
| Q9H694 | BICC1    | BicC family RNA binding protein 1                            |
| Q9H246 | C1orf21  | chromosome 1 open reading frame 21                           |
| Q8N3J6 | CADM2    | cell adhesion molecule 2                                     |
| Q9Y6Y1 | CAMTA1   | calmodulin binding transcription activator 1                 |
| Q6IMN6 | CAPRIN2  | caprin family member 2                                       |
| Q16204 | CCDC6    | coiled-coil domain containing 6                              |
| Q9BWU1 | CDK19    | cyclin dependent kinase 19                                   |
| P14384 | CPM      | carboxypeptidase M                                           |
| O60494 | CUBN     | cubilin                                                      |
| P39880 | CUX1     | cut like homeobox 1                                          |
| Q7LFL8 | CXXC5    | CXXC finger protein 5                                        |
| Q7Z449 | CYP2U1   | cytochrome P450 family 2 subfamily U member 1                |
| Q9H1C7 | CYSTM1   | cysteine rich transmembrane module containing 1              |
| Q8WTU0 | DDI1     | DNA damage inducible 1 homolog 1                             |
| Q8IZD9 | DOCK3    | dedicator of cytokinesis 3                                   |
| Q92630 | DYRK2    | dual specificity tyrosine phosphorylation regulated kinase 2 |
| A4FU69 | EFCAB5   | EF-hand calcium binding domain 5                             |
| Q9H2F5 | EPC1     | enhancer of polycomb homolog 1                               |

|        |         |                                                                |
|--------|---------|----------------------------------------------------------------|
| Q15303 | ERBB3   | erb-b2 receptor tyrosine kinase 3                              |
| Q9H6T0 | ESRP2   | epithelial splicing regulatory protein 2                       |
| Q6V0I7 | FAT4    | FAT atypical cadherin 4                                        |
| Q96JP0 | FEM1C   | fem-1 homolog C                                                |
| O95684 | FGFR1OP | FGFR1 oncogene partner                                         |
| Q14314 | FGL2    | fibrinogen like 2                                              |
| Q01167 | FOXK2   | forkhead box K2                                                |
| O43903 | GAS2    | growth arrest specific 2                                       |
| Q8TF65 | GIPC2   | GIPC PDZ domain containing family member 2                     |
| Q3T8J9 | GON4L   | gon-4 like                                                     |
| Q4G148 | GXYLT1  | glucoside xylosyltransferase 1                                 |
| Q16534 | HLF     | HLF, PAR bZIP transcription factor                             |
| P00492 | HPRT1   | hypoxanthine phosphoribosyltransferase 1                       |
| P40189 | IL6ST   | interleukin 6 signal transducer                                |
| Q15652 | JMJD1C  | jumonji domain containing 1C                                   |
| Q92794 | KAT6A   | lysine acetyltransferase 6A                                    |
| Q86Z14 | KLB     | klotho beta                                                    |
| Q6P9F7 | LRRC8B  | leucine rich repeat containing 8 VRAC subunit B                |
| P53779 | MAPK10  | mitogen-activated protein kinase 10                            |
| Q5T0T0 | MARCH8  | membrane associated ring-CH-type finger 8                      |
| O15021 | MAST4   | microtubule associated serine/threonine kinase family member 4 |
| P55198 | MLLT6   | MLLT6, PHD finger containing                                   |
| Q9UL68 | MYT1L   | myelin transcription factor 1 like                             |
| O00712 | NFIB    | nuclear factor I B                                             |
| Q9Y239 | NOD1    | nucleotide binding oligomerization domain containing 1         |
| Q9Y466 | NR2E1   | nuclear receptor subfamily 2 group E member 1                  |
| Q9Y5K3 | PCYT1B  | phosphate cytidylyltransferase 1, choline, beta                |
| Q8N165 | PDIK1L  | PDLIM1 interacting kinase 1 like                               |

|  |        |          |                                                                       |
|--|--------|----------|-----------------------------------------------------------------------|
|  | Q01813 | PFKP     | phosphofructokinase, platelet                                         |
|  | P35080 | PFN2     | profilin 2                                                            |
|  | Q8IZ21 | PHACTR4  | phosphatase and actin regulator 4                                     |
|  | Q8WYR1 | PIK3R5   | phosphoinositide-3-kinase regulatory subunit 5                        |
|  | Q5VZY2 | PLPP4    | phospholipid phosphatase 4                                            |
|  | Q07869 | PPARA    | peroxisome proliferator activated receptor alpha                      |
|  | Q08209 | PPP3CA   | protein phosphatase 3 catalytic subunit alpha                         |
|  | Q5MIZ7 | PPP4R3B  | protein phosphatase 4 regulatory subunit 3B                           |
|  | P13861 | PRKAR2A  | protein kinase cAMP-dependent type II regulatory subunit alpha        |
|  | Q9UKA9 | PTBP2    | polypyrimidine tract binding protein 2                                |
|  | Q96NR3 | PTCHD1   | patched domain containing 1                                           |
|  | P29074 | PTPN4    | protein tyrosine phosphatase, non-receptor type 4                     |
|  | Q2KHR3 | QSER1    | glutamine and serine rich 1                                           |
|  | Q15276 | RABEP1   | rabaptin, RAB GTPase binding effector protein 1                       |
|  | P61587 | RND3     | Rho family GTPase 3                                                   |
|  | Q9H0F5 | RNF38    | ring finger protein 38                                                |
|  | P62341 | SELENOT  | selenoprotein T                                                       |
|  | Q9UJH3 | SFMBT1   | Scm like with four mbt domains 1                                      |
|  | Q9P270 | SLAIN2   | SLAIN motif family member 2                                           |
|  | O15403 | SLC16A6  | solute carrier family 16 member 6                                     |
|  | P48066 | SLC6A11  | solute carrier family 6 member 11                                     |
|  | O15198 | SMAD9    | SMAD family member 9                                                  |
|  | O75643 | SNRNP200 | small nuclear ribonucleoprotein U5 subunit 200                        |
|  | O43791 | SPOP     | speckle type BTB/POZ protein                                          |
|  | Q9C0D5 | TANC1    | tetratricopeptide repeat, ankyrin repeat and coiled-coil containing 1 |
|  | P10828 | THRB     | thyroid hormone receptor beta                                         |
|  | Q9BRN9 | TM2D3    | TM2 domain containing 3                                               |



|            |                                      |        |          |                                                                                                                                                                                                                                                                                                                |
|------------|--------------------------------------|--------|----------|----------------------------------------------------------------------------------------------------------------------------------------------------------------------------------------------------------------------------------------------------------------------------------------------------------------|
|            |                                      | Q9H2K2 | TNKS2    | tankyrase 2                                                                                                                                                                                                                                                                                                    |
|            |                                      | Q96A56 | TP53INP1 | tumor protein p53 inducible nuclear protein 1                                                                                                                                                                                                                                                                  |
|            |                                      | Q9H3D4 | TP63     | tumor protein p63                                                                                                                                                                                                                                                                                              |
|            |                                      | Q9UPV9 | TRAK1    | trafficking kinesin protein 1                                                                                                                                                                                                                                                                                  |
|            |                                      | Q9UKU6 | TRHDE    | thyrotropin releasing hormone degrading enzyme                                                                                                                                                                                                                                                                 |
|            |                                      | Q5W5X9 | TTC23    | tetratricopeptide repeat domain 23                                                                                                                                                                                                                                                                             |
|            |                                      | Q9BTX7 | TTPAL    | alpha tocopherol transfer protein like                                                                                                                                                                                                                                                                         |
|            |                                      | Q9Y6I4 | USP3     | ubiquitin specific peptidase 3                                                                                                                                                                                                                                                                                 |
|            |                                      | P62068 | USP46    | ubiquitin specific peptidase 46                                                                                                                                                                                                                                                                                |
|            |                                      | Q9C0D7 | ZC3H12C  | zinc finger CCCH-type containing 12C                                                                                                                                                                                                                                                                           |
|            |                                      | Q9NYG2 | ZDHHC3   | zinc finger DHHC-type containing 3                                                                                                                                                                                                                                                                             |
|            |                                      | Q15911 | ZFHX3    | zinc finger homeobox 3                                                                                                                                                                                                                                                                                         |
|            |                                      | Q96KR1 | ZFR      | zinc finger RNA binding protein                                                                                                                                                                                                                                                                                |
|            |                                      | Q7Z3T8 | ZFYVE16  | zinc finger FYVE-type containing 16                                                                                                                                                                                                                                                                            |
|            |                                      | P17014 | ZNF12    | zinc finger protein 12                                                                                                                                                                                                                                                                                         |
|            |                                      | O14771 | ZNF213   | zinc finger protein 213                                                                                                                                                                                                                                                                                        |
|            |                                      | P17028 | ZNF24    | zinc finger protein 24                                                                                                                                                                                                                                                                                         |
|            |                                      | Q9Y462 | ZNF711   | zinc finger protein 711                                                                                                                                                                                                                                                                                        |
|            |                                      | Q17R98 | ZNF827   | zinc finger protein 827                                                                                                                                                                                                                                                                                        |
|            |                                      | Q49A17 | GALNTL6  | Polypeptide N-acetylgalactosaminyltransferase-like 6 (EC 2.4.1.41) (Polypeptide GalNAc transferase 17) (GalNAc-T17) (pp-GaNTase 17) (Protein-UDP acetylgalactosaminyltransferase 17) (Putative polypeptide N-acetylgalactosaminyltransferase 17) (UDP-GalNAc:polypeptide N-acetylgalactosaminyltransferase 17) |
| TargetScan | miR-551a<br>Downregulated 6<br>hours | Q9NQ87 | HEYL     | Hairy/enhancer-of-split related with YRPW motif-like protein (hHeyL) (Class B basic helix-loop-helix protein 33) (bHLHb33) (Hairy-related transcription factor 3) (HRT-3) (hHRT3)                                                                                                                              |
|            |                                      | O94910 | ADGRL1   | adhesion G protein-coupled receptor L1                                                                                                                                                                                                                                                                         |

|       |  |        |         |                                          |
|-------|--|--------|---------|------------------------------------------|
| miRDB |  | Q5IJ48 | CRB2    | crumbs cell polarity complex component 2 |
|       |  | Q15303 | ERBB4   | erb-b2 receptor tyrosine kinase 4        |
|       |  | Q9NRS4 | TMPRSS4 | transmembrane serine protease 4          |
|       |  | P16415 | ZFP36   | ZFP36 ring finger protein                |

**Table S3.** Risk evaluation of miRNA levels at baseline in disease progression (at 30 and 60 days) and death according to BCLC stage in the study cohort (n=36; BCLC-B n=9; BCLC-C n=27). Hazard Ratio models were adjusted to prognostic factors Child-Pugh and Performance Status (PS) stages. Hazard Ratio, HR; Confidence Intervals, CI; *p*, *p*-value.

| BCLC   | Event                  | miRNA       | Prognostic factor      | HR, CI (95%)               | <i>p</i>         |
|--------|------------------------|-------------|------------------------|----------------------------|------------------|
| BCLC-B | <i>ns</i>              |             |                        |                            |                  |
| BCLC-C | Progression<br>30 days | miR-194-5p  | none                   | 1.0041 (1.0003-<br>1.0079) | <i>p</i> =0.0348 |
|        | Death                  | miR-194-5p  | Child-Pugh/PS<br>Stage | 0.8670 (0.7536-<br>0.9973) | <i>p</i> =0.0458 |
|        |                        | miR-200c-3p | Child-Pugh/PS<br>Stage | 0.7710 (0.5994-<br>0.9917) | <i>p</i> =0.0429 |
|        |                        | miR-505-5p  | Child-Pugh/PS<br>Stage | 0.3751 (0.1662-<br>0.8465) | <i>p</i> =0.0182 |

miR-XXX, Baseline miRNA value; *ns*, non-significant

**Table S4.** Risk evaluation of miRNA time-dependent values upon Sorafenib treatment in disease progression (at 30 and 60 days) and death according to BCLC stage in the study cohort (n=36; BCLC-B n=9; BCLC-C n=27). Hazard Ratio models were adjusted to prognostic factors Child-Pugh and Performance Status (PS) stages. Hazard Ratio, HR; Confidence Intervals, CI; *p*, *p*-value.

| BCLC   | Event                  | miRNA      | Prognostic factor | HR, CI (95%)           | <i>p</i>         |
|--------|------------------------|------------|-------------------|------------------------|------------------|
| BCLC-B | <i>Ns</i>              |            |                   |                        |                  |
| BCLC-C | Progression<br>30 days | miR-194-5p | PS Stage          | 1.0040 (1.0005-1.0080) | <i>p</i> =0.0256 |
|        |                        | miR-375    | PS Stage          | 1.0230 (1.0004-1.0460) | <i>p</i> =0.0457 |
|        | Progression<br>60 days | <i>ns</i>  |                   |                        |                  |
|        | Death                  | miR-194-5p | PS Stage          | 1.0020 (1.0001-1.0030) | <i>p</i> =0.0423 |
|        |                        | miR-222-5p | PS Stage          | 1.0830 (1.0078-1.1640) | <i>p</i> =0.0299 |
|        |                        | miR-512-3p | PS Stage          | 1.0660 (1.0095-1.1260) | <i>p</i> =0.0214 |

miR-XXX, miRNA time-dependent value; *ns*, non-significant

**Table S5.** Risk evaluation of miRNA levels at baseline in disease progression (at 30 and 60 days) and death according to BCLC stage in the validation cohort (n=81; BCLC-B n=34; BCLC-C n=47). Hazard Ratio models were adjusted to prognostic factors Child-Pugh and Performance Status (PS) stages. Hazard Ratio, HR; Confidence Intervals, CI; *p*, *p*-value.

| BCLC   | Event                  | miRNA       | Prognostic factor | HR, CI (95%)                  | <i>p</i>         |
|--------|------------------------|-------------|-------------------|-------------------------------|------------------|
| BCLC-B | Progression<br>30 days | miR-122-5p  | None              | 1.0886 (1.0071-1.1724)        | <i>p</i> =0.0322 |
|        |                        | miR-193b-3p | Child-Pugh Stage  | 2.1047 (1.1643-3.8048)        | <i>p</i> =0.0138 |
|        |                        | miR-200c-3p | Child-Pugh Stage  | 12.4978 (1.9487-80.1549)      | <i>p</i> =0.0077 |
|        |                        | miR-222-5p  | Child-Pugh        | 3.6020 (1.2961-10.0106)       | <i>p</i> =0.0140 |
|        |                        | miR-27a-3p  | Child-Pugh Stage  | 1.2170 (1.0300-1.4381)        | <i>p</i> =0.0211 |
|        |                        | miR-505-5p  | Child-Pugh Stage  | 61371<br>(1.3443- 2801672036) | <i>p</i> =0.0440 |
|        | Progression<br>60 days | miR-122-5p  | Child-Pugh Stage  | 1.0857 (1.0110-1.1658)        | <i>p</i> =0.0237 |
|        |                        | miR-193b-3p | Child-Pugh Stage  | 2.0347 (1.1498-3.6008)        | <i>p</i> =0.0147 |
|        |                        | miR-200c-3p | Child-Pugh Stage  | 17.3488 (2.5919-116.1300)     | <i>p</i> =0.0033 |
|        |                        | miR-222-5p  | Child-Pugh Stage  | 3.4207 (1.2698-9.2147)        | <i>p</i> =0.0150 |

|        |                        |             |                        |                          |            |
|--------|------------------------|-------------|------------------------|--------------------------|------------|
|        |                        | miR-27a-3p  | Child-Pugh Stage       | 1.2008 (1.0226-1.4099)   | $p=0.0255$ |
|        |                        | miR-505-5p  | Child-Pugh Stage       | 302.5600 (2.1436-42705)  | $p=0.0237$ |
|        | Death                  | miR-148b-3p | Child-Pugh Stage       | 3.5165 (1.6369-7.5527)   | $p=0.0013$ |
| BCLC-C | Progression<br>30 days | miR-194-5p  | Child-Pugh/PS<br>Stage | 1.7422 (1.1580-2.6213)   | $p=0.0077$ |
|        |                        | miR-222-5p  | Child-Pugh/PS<br>Stage | 10.0573 (1.1956-84.6014) | $p=0.0336$ |
|        |                        | miR-375     | Child-Pugh/PS<br>Stage | 3.2191 (1.3467-7.6946)   | $p=0.0086$ |
|        | Progression<br>60 days | miR-194-5p  | Child-Pugh/PS<br>Stage | 1.4009 (1.0432-1.8813)   | $p=0.0250$ |
|        |                        | miR-375     | Child-Pugh/PS<br>Stage | 2.5611 (1.2032-5.4516)   | $p=0.0147$ |
|        | Death                  | miR-200c-3p | Child-Pugh Stage       | 0.2205 (0.05046-0.9632)  | $p=0.0445$ |
|        |                        |             |                        |                          |            |

miR-XXX, Baseline miRNA value

**Table S6.** Risk evaluation of miRNA time-dependent values upon Sorafenib treatment in disease progression (at 30 and 60 days) and death according to BCLC stage in the validation cohort (n=81; BCLC-B n=34; BCLC-C n=47). Hazard Ratio models were adjusted to prognostic factors Child-Pugh and Performance Status (PS) stages. Hazard Ratio, HR; Confidence Intervals, CI; *p*, *p*-value.

| BCLC   | Event                  | miRNA      | Prognostic factor            | HR, CI (95%)                   | <i>p</i>         |
|--------|------------------------|------------|------------------------------|--------------------------------|------------------|
| BCLC-B | <i>ns</i>              |            |                              |                                |                  |
| BCLC-C | Progression<br>30 days | miR-222-5p | Child-Pugh/PS<br>Stage       | 10.9683 (1.3405-<br>89.7455)   | <i>p</i> =0.0255 |
|        | Death                  | miR-222-5p | Child-Pugh<br>Stage/PS Stage | 40.1822 (5.5213-<br>292.4300)  | <i>p</i> =0.0003 |
|        |                        | miR-512-3p | Child-Pugh/PS<br>Stage       | 50.1449 (1.5718-<br>1599.7400) | <i>p</i> =0.0267 |

miR-XXX, miRNA time-dependent value; *ns*, non-significant

**Table S7.** Expression data of regulated genes by miR-200c-3p. Direct predicted miRNA targets are highlighted in orange.

| Ensembl ID      | Gene name  | I-miR-200c-3p (Sorafenib-Control) |                                |           |           | Transfection Control (Sorafenib-control) |                                |         |           |
|-----------------|------------|-----------------------------------|--------------------------------|-----------|-----------|------------------------------------------|--------------------------------|---------|-----------|
|                 |            | Base mean                         | log <sub>2</sub> (Fold-Change) | p-value   | p-adj     | Base mean                                | log <sub>2</sub> (Fold-Change) | p-value | p-adj     |
| ENSG00000099860 | GADD45B    | 856.575                           | 3.148                          | 1.231E-67 | 3.635E-64 | 556.157                                  | 0.380                          | 0.0185  | 7.703E-01 |
| ENSG00000169688 | MT1B       | 150.877                           | 4.035                          | 5.081E-51 | 1.000E-47 | 189.137                                  | 0.073                          | 0.3577  | 9.992E-01 |
| ENSG00000205364 | MT1M       | 132.002                           | 2.439                          | 8.718E-21 | 1.030E-17 | 192.340                                  | 0.155                          | 0.1702  | 9.992E-01 |
| ENSG00000275993 | SIK1B      | 45.693                            | 1.738                          | 4.150E-10 | 1.691E-07 | 24.322                                   | 0.531                          | 0.0016  | 1.967E-01 |
| ENSG00000210077 | MT-TV      | 216.376                           | 1.388                          | 7.836E-08 | 2.153E-05 | 173.938                                  | 0.338                          | 0.0624  | 9.992E-01 |
| ENSG00000103460 | TOX3       | 453.941                           | 0.973                          | 1.458E-07 | 3.559E-05 | 325.003                                  | 0.292                          | 0.0487  | 9.992E-01 |
| ENSG00000204388 | HSPA1B     | 311.691                           | 1.070                          | 3.934E-07 | 8.449E-05 | 302.114                                  | 0.169                          | 0.3006  | 9.992E-01 |
| ENSG00000132677 | RHBG       | 810.682                           | 0.795                          | 1.569E-06 | 2.808E-04 | 550.386                                  | 0.331                          | 0.0202  | 7.780E-01 |
| ENSG00000196756 | SNHG17     | 535.232                           | 0.801                          | 3.619E-06 | 5.857E-04 | 350.414                                  | 0.460                          | 0.0019  | 2.170E-01 |
| ENSG00000160972 | PPP1R16A   | 300.748                           | 0.972                          | 8.791E-06 | 1.251E-03 | 233.439                                  | 0.381                          | 0.0246  | 8.413E-01 |
| ENSG00000205362 | MT1A       | 154.314                           | 1.046                          | 1.290E-05 | 1.732E-03 | 87.935                                   | 0.373                          | 0.0364  | 9.340E-01 |
| ENSG00000198355 | PIM3       | 2235.756                          | 0.749                          | 1.616E-05 | 2.052E-03 | 1505.591                                 | 0.365                          | 0.0075  | 5.147E-01 |
| ENSG00000135111 | TBX3       | 1632.003                          | 0.584                          | 1.659E-05 | 2.066E-03 | 931.210                                  | 0.479                          | 0.0000  | 2.001E-02 |
| ENSG00000168209 | DDIT4      | 281.018                           | 0.838                          | 3.018E-05 | 3.496E-03 | 191.002                                  | 0.487                          | 0.0032  | 3.113E-01 |
| ENSG00000186301 | MST1P2     | 219.707                           | 0.932                          | 3.147E-05 | 3.554E-03 | 143.099                                  | 0.356                          | 0.0313  | 8.939E-01 |
| ENSG00000187837 | HIST1H1C   | 1562.764                          | 0.906                          | 3.159E-05 | 3.554E-03 | 1156.529                                 | 0.157                          | 0.3400  | 9.992E-01 |
| ENSG00000157827 | FMNL2      | 689.755                           | 0.674                          | 6.307E-05 | 6.314E-03 | 446.991                                  | 0.294                          | 0.0315  | 8.940E-01 |
| ENSG00000122085 | MTERF4     | 305.978                           | 0.813                          | 6.964E-05 | 6.856E-03 | 193.567                                  | 0.158                          | 0.3114  | 9.992E-01 |
| ENSG00000188529 | SRSF10     | 1316.842                          | 0.566                          | 7.841E-05 | 7.470E-03 | 805.400                                  | 0.321                          | 0.0125  | 6.403E-01 |
| ENSG00000267519 | AC020916.1 | 41.889                            | 1.104                          | 8.814E-05 | 8.199E-03 | 26.090                                   | 0.220                          | 0.2126  | 9.992E-01 |
| ENSG00000169155 | ZBTB43     | 265.885                           | 0.805                          | 9.125E-05 | 8.356E-03 | 176.862                                  | 0.396                          | 0.0175  | 7.566E-01 |
| ENSG00000274605 | AL355338.1 | 109.370                           | 0.983                          | 1.357E-04 | 1.152E-02 | 73.643                                   | 0.301                          | 0.0940  | 9.992E-01 |
| ENSG00000176046 | NUPR1      | 515.604                           | 0.702                          | 1.366E-04 | 1.152E-02 | 431.528                                  | 0.370                          | 0.0078  | 5.180E-01 |



|                 |            |          |       |           |           |          |        |        |           |
|-----------------|------------|----------|-------|-----------|-----------|----------|--------|--------|-----------|
| ENSG00000113318 | MSH3       | 216.663  | 0.847 | 1.518E-04 | 1.245E-02 | 137.280  | 0.073  | 0.6765 | 9.992E-01 |
| ENSG00000165416 | SUGT1      | 893.418  | 0.617 | 1.511E-04 | 1.245E-02 | 601.514  | 0.198  | 0.1047 | 9.992E-01 |
| ENSG00000143153 | ATP1B1     | 3581.934 | 0.522 | 1.721E-04 | 1.383E-02 | 2520.418 | 0.206  | 0.0737 | 9.992E-01 |
| ENSG00000272888 | LINC01578  | 390.829  | 0.705 | 2.140E-04 | 1.610E-02 | 254.854  | 0.294  | 0.0672 | 9.992E-01 |
| ENSG00000171970 | ZNF57      | 33.976   | 1.000 | 2.317E-04 | 1.700E-02 | 23.273   | 0.119  | 0.5076 | 9.992E-01 |
| ENSG00000114127 | XRN1       | 151.073  | 0.876 | 2.398E-04 | 1.748E-02 | 122.749  | 0.352  | 0.0504 | 9.992E-01 |
| ENSG00000197647 | ZNF433     | 54.525   | 1.032 | 2.441E-04 | 1.769E-02 | 29.906   | 0.797  | 0.0000 | 8.425E-03 |
| ENSG00000130529 | TRPM4      | 44.749   | 1.019 | 2.937E-04 | 2.006E-02 | 31.005   | 0.388  | 0.0275 | 8.800E-01 |
| ENSG00000138336 | TET1       | 383.523  | 0.678 | 3.139E-04 | 2.103E-02 | 270.331  | 0.173  | 0.2859 | 9.992E-01 |
| ENSG00000153914 | SREK1      | 1517.370 | 0.607 | 3.196E-04 | 2.103E-02 | 1037.944 | 0.298  | 0.0139 | 6.687E-01 |
| ENSG00000182809 | CRIP2      | 137.499  | 0.889 | 3.696E-04 | 2.348E-02 | 104.342  | 0.197  | 0.2793 | 9.992E-01 |
| ENSG00000116044 | NFE2L2     | 2254.523 | 0.536 | 3.864E-04 | 2.390E-02 | 1355.198 | 0.319  | 0.0117 | 6.281E-01 |
| ENSG00000204387 | C6orf48    | 1298.937 | 0.568 | 4.207E-04 | 2.549E-02 | 809.379  | 0.419  | 0.0008 | 1.288E-01 |
| ENSG00000185551 | NR2F2      | 953.358  | 0.664 | 4.316E-04 | 2.577E-02 | 634.102  | 0.240  | 0.0919 | 9.992E-01 |
| ENSG00000137204 | SLC22A7    | 57.814   | 0.978 | 4.721E-04 | 2.775E-02 | 40.624   | 0.215  | 0.2418 | 9.992E-01 |
| ENSG00000121067 | SPOP       | 1553.150 | 0.502 | 5.150E-04 | 2.953E-02 | 1219.345 | 0.241  | 0.0714 | 9.992E-01 |
| ENSG00000152382 | TADA1      | 140.382  | 0.854 | 5.434E-04 | 3.057E-02 | 87.916   | 0.194  | 0.2788 | 9.992E-01 |
| ENSG00000077463 | SIRT6      | 72.518   | 0.943 | 6.391E-04 | 3.479E-02 | 58.294   | 0.249  | 0.1764 | 9.992E-01 |
| ENSG00000197905 | TEAD4      | 464.063  | 0.652 | 7.855E-04 | 4.124E-02 | 319.690  | -0.017 | 0.9039 | 9.992E-01 |
| ENSG00000108375 | RNF43      | 900.415  | 0.579 | 9.276E-04 | 4.703E-02 | 500.043  | 0.446  | 0.0015 | 1.925E-01 |
| ENSG00000274976 | AC087588.2 | 33.186   | 0.882 | 9.983E-04 | 4.955E-02 | 18.771   | 0.274  | 0.0862 | 9.992E-01 |
| ENSG00000163602 | RYBP       | 884.182  | 0.548 | 1.039E-03 | 5.091E-02 | 660.804  | 0.416  | 0.0063 | 4.640E-01 |
| ENSG00000198563 | DDX39B     | 50.445   | 0.921 | 1.046E-03 | 5.105E-02 | 32.036   | 0.333  | 0.0690 | 9.992E-01 |
| ENSG00000118246 | FASTKD2    | 376.753  | 0.615 | 1.124E-03 | 5.354E-02 | 217.249  | -0.058 | 0.7104 | 9.992E-01 |
| ENSG00000153140 | CETN3      | 2430.659 | 0.524 | 1.150E-03 | 5.456E-02 | 1722.011 | 0.213  | 0.0937 | 9.992E-01 |
| ENSG00000175575 | PAAF1      | 159.239  | 0.754 | 1.215E-03 | 5.688E-02 | 113.662  | 0.208  | 0.2144 | 9.992E-01 |
| ENSG00000082438 | COBLL1     | 606.761  | 0.568 | 1.218E-03 | 5.688E-02 | 413.744  | 0.132  | 0.3393 | 9.992E-01 |
| ENSG00000245848 | CEBPA      | 1193.792 | 0.523 | 1.212E-03 | 5.688E-02 | 725.931  | 0.252  | 0.0518 | 9.992E-01 |
| ENSG00000081913 | PHLPP1     | 260.444  | 0.679 | 1.243E-03 | 5.757E-02 | 187.667  | 0.184  | 0.2292 | 9.992E-01 |

|                 |          |          |       |           |           |          |        |        |           |
|-----------------|----------|----------|-------|-----------|-----------|----------|--------|--------|-----------|
| ENSG00000102710 | SUPT20H  | 346.186  | 0.664 | 1.266E-03 | 5.818E-02 | 205.102  | 0.283  | 0.0812 | 9.992E-01 |
| ENSG00000115718 | PROC     | 596.740  | 0.541 | 1.383E-03 | 6.212E-02 | 377.204  | 0.184  | 0.1799 | 9.992E-01 |
| ENSG00000171729 | TMEM51   | 499.433  | 0.611 | 1.557E-03 | 6.664E-02 | 320.638  | 0.180  | 0.2495 | 9.992E-01 |
| ENSG00000189046 | ALKBH2   | 176.602  | 0.810 | 1.568E-03 | 6.688E-02 | 133.409  | 0.072  | 0.6735 | 9.992E-01 |
| ENSG00000120694 | HSPH1    | 1569.327 | 0.517 | 1.626E-03 | 6.812E-02 | 1084.010 | 0.158  | 0.2390 | 9.992E-01 |
| ENSG00000163516 | ANKZF1   | 246.999  | 0.673 | 1.710E-03 | 7.062E-02 | 163.355  | 0.249  | 0.1204 | 9.992E-01 |
| ENSG00000168564 | CDKN2AIP | 182.576  | 0.736 | 1.759E-03 | 7.191E-02 | 121.578  | 0.190  | 0.2724 | 9.992E-01 |
| ENSG00000183337 | BCOR     | 325.442  | 0.703 | 1.768E-03 | 7.203E-02 | 233.971  | 0.163  | 0.2845 | 9.992E-01 |
| ENSG00000129484 | PARP2    | 307.236  | 0.641 | 1.804E-03 | 7.248E-02 | 216.072  | 0.104  | 0.4919 | 9.992E-01 |
| ENSG00000120616 | EPC1     | 743.153  | 0.559 | 1.831E-03 | 7.331E-02 | 538.288  | 0.365  | 0.0034 | 3.168E-01 |
| ENSG00000124177 | CHD6     | 467.537  | 0.674 | 1.853E-03 | 7.393E-02 | 383.736  | 0.323  | 0.0290 | 8.861E-01 |
| ENSG00000171227 | TMEM37   | 623.056  | 0.682 | 1.918E-03 | 7.603E-02 | 384.189  | 0.256  | 0.0919 | 9.992E-01 |
| ENSG00000165030 | NFIL3    | 448.290  | 0.556 | 2.015E-03 | 7.882E-02 | 309.309  | 0.350  | 0.0212 | 7.869E-01 |
| ENSG00000186204 | CYP4F12  | 63.061   | 0.864 | 2.045E-03 | 7.948E-02 | 41.722   | 0.129  | 0.4869 | 9.992E-01 |
| ENSG00000067606 | PRKCZ    | 224.581  | 0.670 | 2.268E-03 | 8.615E-02 | 162.044  | 0.103  | 0.5658 | 9.992E-01 |
| ENSG00000068120 | COASY    | 678.313  | 0.549 | 2.337E-03 | 8.820E-02 | 454.750  | 0.334  | 0.0187 | 7.703E-01 |
| ENSG00000103245 | NARFL    | 61.048   | 0.826 | 2.653E-03 | 9.763E-02 | 42.053   | 0.183  | 0.3244 | 9.992E-01 |
| ENSG00000188290 | HES4     | 213.886  | 0.751 | 2.738E-03 | 9.853E-02 | 109.974  | 0.295  | 0.1016 | 9.992E-01 |
| ENSG00000102390 | PBDC1    | 411.876  | 0.578 | 2.749E-03 | 9.853E-02 | 322.286  | 0.276  | 0.0491 | 9.992E-01 |
| ENSG00000198408 | MGEA5    | 505.852  | 0.550 | 2.712E-03 | 9.853E-02 | 319.967  | 0.395  | 0.0075 | 5.147E-01 |
| ENSG00000116717 | GADD45A  | 546.253  | 0.510 | 2.778E-03 | 9.915E-02 | 416.814  | 0.385  | 0.0067 | 4.845E-01 |
| ENSG00000128228 | SDF2L1   | 768.675  | 0.568 | 2.799E-03 | 9.951E-02 | 496.321  | 0.082  | 0.5623 | 9.992E-01 |
| ENSG00000087074 | PPP1R15A | 156.907  | 0.706 | 2.848E-03 | 1.006E-01 | 128.727  | 0.498  | 0.0058 | 4.460E-01 |
| ENSG00000174953 | DHX36    | 979.757  | 0.517 | 2.906E-03 | 1.013E-01 | 635.854  | 0.118  | 0.4219 | 9.992E-01 |
| ENSG00000107554 | DNMBP    | 110.524  | 0.769 | 2.931E-03 | 1.018E-01 | 84.908   | 0.129  | 0.4770 | 9.992E-01 |
| ENSG00000197329 | PELI1    | 54.899   | 0.822 | 3.061E-03 | 1.048E-01 | 47.235   | -0.096 | 0.6069 | 9.992E-01 |
| ENSG00000129347 | KRI1     | 174.728  | 0.687 | 3.091E-03 | 1.055E-01 | 116.665  | 0.268  | 0.1285 | 9.992E-01 |
| ENSG00000072682 | P4HA2    | 293.765  | 0.678 | 3.141E-03 | 1.069E-01 | 179.176  | 0.160  | 0.3106 | 9.992E-01 |
| ENSG00000126778 | SIX1     | 276.395  | 0.584 | 3.302E-03 | 1.106E-01 | 187.172  | 0.302  | 0.0527 | 9.992E-01 |

|                 |            |           |       |           |           |           |        |        |           |
|-----------------|------------|-----------|-------|-----------|-----------|-----------|--------|--------|-----------|
| ENSG00000251562 | MALAT1     | 25480.818 | 0.503 | 3.461E-03 | 1.141E-01 | 18181.725 | 0.122  | 0.3560 | 9.992E-01 |
| ENSG00000143921 | ABCG8      | 56.616    | 0.813 | 3.527E-03 | 1.157E-01 | 32.435    | 0.331  | 0.0712 | 9.992E-01 |
| ENSG00000182749 | PAQR7      | 114.208   | 0.761 | 3.677E-03 | 1.197E-01 | 58.747    | -0.199 | 0.2837 | 9.992E-01 |
| ENSG00000214753 | HNRNPUL2   | 631.085   | 0.603 | 3.695E-03 | 1.198E-01 | 383.912   | 0.060  | 0.6714 | 9.992E-01 |
| ENSG00000145703 | IQGAP2     | 913.711   | 0.512 | 3.701E-03 | 1.198E-01 | 589.530   | -0.014 | 0.9211 | 9.992E-01 |
| ENSG00000118369 | USP35      | 43.962    | 0.814 | 3.822E-03 | 1.219E-01 | 33.577    | 0.131  | 0.4769 | 9.992E-01 |
| ENSG00000162664 | ZNF326     | 569.566   | 0.551 | 3.841E-03 | 1.220E-01 | 351.606   | 0.121  | 0.4202 | 9.992E-01 |
| ENSG00000153094 | BCL2L11    | 236.135   | 0.644 | 3.867E-03 | 1.225E-01 | 140.540   | 0.432  | 0.0113 | 6.232E-01 |
| ENSG00000164180 | TMEM161B   | 221.832   | 0.689 | 3.932E-03 | 1.235E-01 | 136.321   | 0.114  | 0.4963 | 9.992E-01 |
| ENSG00000184897 | H1FX       | 1001.821  | 0.535 | 4.041E-03 | 1.266E-01 | 604.391   | 0.363  | 0.0048 | 4.013E-01 |
| ENSG00000140386 | SCAPER     | 223.570   | 0.704 | 4.067E-03 | 1.268E-01 | 124.668   | 0.053  | 0.7552 | 9.992E-01 |
| ENSG00000170802 | FOXN2      | 116.143   | 0.757 | 4.619E-03 | 1.381E-01 | 83.526    | 0.204  | 0.2625 | 9.992E-01 |
| ENSG00000167081 | PBX3       | 268.593   | 0.616 | 4.716E-03 | 1.407E-01 | 193.073   | 0.239  | 0.1422 | 9.992E-01 |
| ENSG00000149262 | INTS4      | 129.566   | 0.711 | 4.809E-03 | 1.413E-01 | 84.962    | -0.087 | 0.6300 | 9.992E-01 |
| ENSG00000196208 | GREB1      | 418.071   | 0.520 | 4.900E-03 | 1.427E-01 | 240.691   | 0.307  | 0.0413 | 9.525E-01 |
| ENSG00000119844 | AFTPH      | 389.390   | 0.532 | 5.387E-03 | 1.541E-01 | 251.844   | 0.162  | 0.2686 | 9.992E-01 |
| ENSG00000267296 | CEBPA-AS1  | 77.895    | 0.751 | 5.759E-03 | 1.619E-01 | 58.295    | -0.003 | 0.9864 | 9.995E-01 |
| ENSG00000175745 | NR2F1      | 730.653   | 0.512 | 5.773E-03 | 1.619E-01 | 426.707   | 0.134  | 0.3313 | 9.992E-01 |
| ENSG00000160888 | IER2       | 824.639   | 0.546 | 5.826E-03 | 1.623E-01 | 584.136   | 0.181  | 0.1770 | 9.992E-01 |
| ENSG00000097096 | SYDE2      | 39.988    | 0.773 | 6.012E-03 | 1.655E-01 | 31.510    | 0.328  | 0.0716 | 9.992E-01 |
| ENSG00000170439 | METTL7B    | 72.662    | 0.761 | 6.106E-03 | 1.670E-01 | 51.201    | 0.161  | 0.3825 | 9.992E-01 |
| ENSG00000141391 | PRELID3A   | 54.358    | 0.769 | 6.207E-03 | 1.680E-01 | 30.540    | -0.128 | 0.4849 | 9.992E-01 |
| ENSG00000145390 | USP53      | 196.821   | 0.659 | 6.381E-03 | 1.709E-01 | 117.455   | 0.455  | 0.0129 | 6.407E-01 |
| ENSG00000011376 | LARS2      | 176.313   | 0.610 | 6.479E-03 | 1.724E-01 | 100.427   | -0.121 | 0.4885 | 9.992E-01 |
| ENSG00000278909 | AC007608.4 | 430.924   | 0.642 | 6.562E-03 | 1.734E-01 | 282.080   | 0.490  | 0.0044 | 3.728E-01 |
| ENSG00000151135 | TMEM263    | 291.700   | 0.550 | 7.213E-03 | 1.864E-01 | 203.857   | 0.077  | 0.6139 | 9.992E-01 |
| ENSG00000103168 | TAF1C      | 222.281   | 0.579 | 7.522E-03 | 1.923E-01 | 137.947   | 0.175  | 0.2759 | 9.992E-01 |
| ENSG00000100150 | DEPDC5     | 33.622    | 0.749 | 7.782E-03 | 1.964E-01 | 22.541    | 0.419  | 0.0181 | 7.636E-01 |
| ENSG00000169249 | ZRSR2      | 87.195    | 0.733 | 7.919E-03 | 1.995E-01 | 65.773    | 0.314  | 0.0858 | 9.992E-01 |

|                 |            |         |       |           |           |         |        |        |           |
|-----------------|------------|---------|-------|-----------|-----------|---------|--------|--------|-----------|
| ENSG00000060566 | CREB3L3    | 123.744 | 0.726 | 8.021E-03 | 2.012E-01 | 61.490  | 0.489  | 0.0084 | 5.370E-01 |
| ENSG00000146776 | ATXN7L1    | 66.542  | 0.721 | 8.014E-03 | 2.012E-01 | 58.033  | 0.145  | 0.4292 | 9.992E-01 |
| ENSG00000237149 | ZNF503-AS2 | 79.260  | 0.734 | 8.735E-03 | 2.144E-01 | 50.520  | 0.215  | 0.2478 | 9.992E-01 |
| ENSG00000105755 | ETHE1      | 306.004 | 0.550 | 8.767E-03 | 2.144E-01 | 170.835 | 0.261  | 0.0986 | 9.992E-01 |
| ENSG00000158528 | PPP1R9A    | 460.642 | 0.527 | 9.125E-03 | 2.191E-01 | 314.760 | 0.108  | 0.4966 | 9.992E-01 |
| ENSG00000166140 | ZFYVE19    | 98.151  | 0.713 | 9.249E-03 | 2.212E-01 | 68.683  | 0.272  | 0.1304 | 9.992E-01 |
| ENSG00000214595 | EML6       | 198.944 | 0.673 | 9.369E-03 | 2.231E-01 | 114.751 | 0.090  | 0.6198 | 9.992E-01 |
| ENSG00000171723 | GPHN       | 94.995  | 0.703 | 9.674E-03 | 2.272E-01 | 71.986  | -0.026 | 0.8853 | 9.992E-01 |
| ENSG00000040487 | PQLC2      | 86.414  | 0.678 | 9.720E-03 | 2.278E-01 | 49.518  | 0.188  | 0.3126 | 9.992E-01 |
| ENSG00000224272 | AC131097.3 | 68.768  | 0.717 | 9.852E-03 | 2.300E-01 | 33.239  | 0.092  | 0.6159 | 9.992E-01 |
| ENSG00000111727 | HCFC2      | 45.467  | 0.726 | 9.928E-03 | 2.304E-01 | 43.845  | -0.016 | 0.9323 | 9.992E-01 |
| ENSG00000073050 | XRCC1      | 246.506 | 0.622 | 1.016E-02 | 2.326E-01 | 178.149 | 0.209  | 0.2200 | 9.992E-01 |
| ENSG00000247400 | DNAJC3-AS1 | 126.332 | 0.671 | 1.029E-02 | 2.347E-01 | 69.728  | 0.197  | 0.2790 | 9.992E-01 |
| ENSG00000094631 | HDAC6      | 223.871 | 0.566 | 1.043E-02 | 2.359E-01 | 130.659 | 0.069  | 0.6778 | 9.992E-01 |
| ENSG00000180423 | HARBI1     | 33.617  | 0.713 | 1.047E-02 | 2.361E-01 | 16.232  | -0.113 | 0.5019 | 9.992E-01 |
| ENSG00000198382 | UVRAG      | 275.983 | 0.564 | 1.055E-02 | 2.361E-01 | 192.520 | 0.441  | 0.0072 | 5.006E-01 |
| ENSG00000173531 | MST1       | 347.314 | 0.531 | 1.061E-02 | 2.362E-01 | 206.096 | 0.409  | 0.0080 | 5.253E-01 |
| ENSG00000163032 | VSNL1      | 319.121 | 0.507 | 1.091E-02 | 2.400E-01 | 234.059 | -0.010 | 0.9442 | 9.992E-01 |
| ENSG00000067836 | ROGDI      | 155.058 | 0.613 | 1.095E-02 | 2.400E-01 | 102.742 | 0.081  | 0.6442 | 9.992E-01 |
| ENSG00000144655 | CSRNP1     | 142.747 | 0.672 | 1.102E-02 | 2.404E-01 | 89.762  | 0.325  | 0.0715 | 9.992E-01 |
| ENSG00000148335 | NTMT1      | 209.408 | 0.621 | 1.142E-02 | 2.442E-01 | 185.595 | 0.081  | 0.6420 | 9.992E-01 |
| ENSG00000237729 | AC002075.2 | 33.745  | 0.687 | 1.152E-02 | 2.451E-01 | 22.640  | 0.048  | 0.7829 | 9.992E-01 |
| ENSG00000109911 | ELP4       | 75.119  | 0.686 | 1.167E-02 | 2.462E-01 | 39.150  | -0.006 | 0.9724 | 9.992E-01 |
| ENSG00000149503 | INCENP     | 321.191 | 0.504 | 1.212E-02 | 2.524E-01 | 228.041 | 0.093  | 0.5802 | 9.992E-01 |
| ENSG00000161835 | GRASP      | 39.701  | 0.704 | 1.237E-02 | 2.537E-01 | 17.427  | 0.149  | 0.3775 | 9.992E-01 |
| ENSG00000179456 | ZBTB18     | 56.648  | 0.703 | 1.256E-02 | 2.549E-01 | 34.546  | 0.111  | 0.5469 | 9.992E-01 |
| ENSG00000169727 | GPS1       | 787.424 | 0.510 | 1.280E-02 | 2.573E-01 | 475.577 | 0.102  | 0.4289 | 9.992E-01 |
| ENSG00000016864 | GLT8D1     | 202.458 | 0.537 | 1.304E-02 | 2.599E-01 | 146.459 | 0.303  | 0.0677 | 9.992E-01 |
| ENSG00000172602 | RND1       | 34.714  | 0.687 | 1.314E-02 | 2.608E-01 | 18.294  | 0.252  | 0.1203 | 9.992E-01 |

|                 |            |         |       |           |           |         |        |        |           |
|-----------------|------------|---------|-------|-----------|-----------|---------|--------|--------|-----------|
| ENSG00000100764 | PSMC1      | 762.251 | 0.548 | 1.346E-02 | 2.639E-01 | 417.745 | 0.079  | 0.6015 | 9.992E-01 |
| ENSG00000156239 | N6AMT1     | 52.759  | 0.687 | 1.370E-02 | 2.646E-01 | 46.290  | 0.047  | 0.8018 | 9.992E-01 |
| ENSG00000102996 | MMP15      | 117.518 | 0.632 | 1.367E-02 | 2.646E-01 | 61.607  | -0.134 | 0.4617 | 9.992E-01 |
| ENSG00000139546 | TARBP2     | 186.274 | 0.620 | 1.369E-02 | 2.646E-01 | 127.045 | 0.097  | 0.5613 | 9.992E-01 |
| ENSG00000110172 | CHORDC1    | 320.046 | 0.542 | 1.405E-02 | 2.659E-01 | 221.404 | 0.033  | 0.8252 | 9.992E-01 |
| ENSG00000119720 | NRDE2      | 210.710 | 0.522 | 1.400E-02 | 2.659E-01 | 144.786 | 0.260  | 0.1099 | 9.992E-01 |
| ENSG00000116117 | PARD3B     | 104.087 | 0.624 | 1.448E-02 | 2.697E-01 | 79.187  | 0.054  | 0.7634 | 9.992E-01 |
| ENSG00000235169 | SMIM1      | 125.129 | 0.615 | 1.455E-02 | 2.704E-01 | 85.326  | 0.142  | 0.4276 | 9.992E-01 |
| ENSG00000205323 | SARNP      | 95.561  | 0.657 | 1.463E-02 | 2.708E-01 | 72.063  | 0.225  | 0.2172 | 9.992E-01 |
| ENSG00000140548 | ZNF710     | 73.966  | 0.683 | 1.509E-02 | 2.750E-01 | 52.413  | 0.139  | 0.4530 | 9.992E-01 |
| ENSG00000124216 | SNAI1      | 35.493  | 0.661 | 1.534E-02 | 2.754E-01 | 26.061  | 0.310  | 0.0809 | 9.992E-01 |
| ENSG00000186529 | CYP4F3     | 98.496  | 0.642 | 1.527E-02 | 2.754E-01 | 70.372  | 0.394  | 0.0313 | 8.939E-01 |
| ENSG00000164414 | SLC35A1    | 126.119 | 0.598 | 1.617E-02 | 2.830E-01 | 56.011  | 0.158  | 0.3888 | 9.992E-01 |
| ENSG00000148219 | ASTN2      | 103.973 | 0.628 | 1.628E-02 | 2.831E-01 | 67.198  | 0.045  | 0.8024 | 9.992E-01 |
| ENSG00000119446 | RBM18      | 172.001 | 0.567 | 1.649E-02 | 2.832E-01 | 110.966 | 0.144  | 0.4026 | 9.992E-01 |
| ENSG00000273142 | AC073335.2 | 33.852  | 0.668 | 1.700E-02 | 2.864E-01 | 17.213  | 0.153  | 0.3661 | 9.992E-01 |
| ENSG00000163214 | DHX57      | 180.167 | 0.537 | 1.703E-02 | 2.866E-01 | 100.033 | 0.214  | 0.2393 | 9.992E-01 |
| ENSG00000117408 | IPO13      | 48.571  | 0.667 | 1.739E-02 | 2.898E-01 | 39.519  | -0.010 | 0.9563 | 9.992E-01 |
| ENSG00000187634 | SAMD11     | 72.934  | 0.667 | 1.767E-02 | 2.913E-01 | 41.972  | 0.393  | 0.0346 | 9.212E-01 |
| ENSG00000101049 | SGK2       | 159.262 | 0.551 | 1.787E-02 | 2.927E-01 | 93.042  | 0.349  | 0.0471 | 9.986E-01 |
| ENSG00000198929 | NOS1AP     | 132.521 | 0.597 | 1.793E-02 | 2.929E-01 | 89.573  | 0.303  | 0.0909 | 9.992E-01 |
| ENSG00000069399 | BCL3       | 304.593 | 0.522 | 1.802E-02 | 2.933E-01 | 180.604 | 0.459  | 0.0032 | 3.113E-01 |
| ENSG00000224597 | SVIL-AS1   | 147.126 | 0.581 | 1.824E-02 | 2.944E-01 | 112.775 | 0.133  | 0.4477 | 9.992E-01 |
| ENSG00000141556 | TBCD       | 404.072 | 0.564 | 1.908E-02 | 3.007E-01 | 249.815 | 0.119  | 0.4656 | 9.992E-01 |
| ENSG00000176371 | ZSCAN2     | 200.283 | 0.516 | 1.906E-02 | 3.007E-01 | 115.943 | 0.174  | 0.3174 | 9.992E-01 |
| ENSG00000004766 | VPS50      | 37.931  | 0.658 | 1.957E-02 | 3.051E-01 | 37.108  | -0.073 | 0.6937 | 9.992E-01 |
| ENSG00000198551 | ZNF627     | 34.951  | 0.638 | 1.953E-02 | 3.051E-01 | 29.421  | 0.233  | 0.2017 | 9.992E-01 |
| ENSG00000205212 | CCDC144NL  | 30.565  | 0.650 | 1.969E-02 | 3.057E-01 | 18.387  | 0.244  | 0.1549 | 9.992E-01 |
| ENSG00000167702 | KIFC2      | 37.926  | 0.656 | 1.980E-02 | 3.057E-01 | 41.303  | -0.006 | 0.9746 | 9.992E-01 |

|                 |         |         |       |           |           |         |        |        |           |
|-----------------|---------|---------|-------|-----------|-----------|---------|--------|--------|-----------|
| ENSG00000133104 | SPART   | 99.985  | 0.597 | 2.067E-02 | 3.113E-01 | 64.213  | -0.001 | 0.9968 | 9.999E-01 |
| ENSG00000033170 | FUT8    | 80.948  | 0.630 | 2.105E-02 | 3.142E-01 | 48.407  | -0.024 | 0.8987 | 9.992E-01 |
| ENSG00000173681 | BCLAF3  | 59.142  | 0.640 | 2.159E-02 | 3.189E-01 | 37.267  | 0.141  | 0.4476 | 9.992E-01 |
| ENSG00000081923 | ATP8B1  | 50.512  | 0.639 | 2.164E-02 | 3.191E-01 | 27.799  | 0.329  | 0.0657 | 9.992E-01 |
| ENSG00000139998 | RAB15   | 216.671 | 0.513 | 2.263E-02 | 3.257E-01 | 147.399 | 0.004  | 0.9814 | 9.992E-01 |
| ENSG00000066827 | ZFAT    | 44.376  | 0.639 | 2.310E-02 | 3.296E-01 | 16.482  | 0.241  | 0.1455 | 9.992E-01 |
| ENSG00000168916 | ZNF608  | 44.117  | 0.635 | 2.407E-02 | 3.349E-01 | 22.410  | 0.002  | 0.9912 | 9.995E-01 |
| ENSG00000138050 | THUMPD2 | 148.112 | 0.543 | 2.391E-02 | 3.349E-01 | 72.763  | 0.091  | 0.6174 | 9.992E-01 |
| ENSG00000130158 | DOCK6   | 88.767  | 0.584 | 2.446E-02 | 3.362E-01 | 52.008  | 0.260  | 0.1618 | 9.992E-01 |
| ENSG00000166439 | RNF169  | 275.310 | 0.504 | 2.472E-02 | 3.376E-01 | 209.329 | 0.072  | 0.6419 | 9.992E-01 |
| ENSG00000125772 | GPCPD1  | 256.868 | 0.532 | 2.540E-02 | 3.430E-01 | 143.953 | 0.396  | 0.0181 | 7.636E-01 |
| ENSG00000184979 | USP18   | 37.234  | 0.623 | 2.561E-02 | 3.446E-01 | 35.038  | 0.238  | 0.1965 | 9.992E-01 |
| ENSG00000059728 | MXD1    | 118.245 | 0.597 | 2.690E-02 | 3.559E-01 | 85.907  | 0.357  | 0.0432 | 9.716E-01 |
| ENSG00000109103 | UNC119  | 74.846  | 0.607 | 2.723E-02 | 3.593E-01 | 59.768  | 0.226  | 0.2182 | 9.992E-01 |
| ENSG00000134899 | ERCC5   | 146.572 | 0.546 | 2.737E-02 | 3.600E-01 | 111.779 | -0.247 | 0.1453 | 9.992E-01 |
| ENSG00000196456 | ZNF775  | 35.712  | 0.617 | 2.769E-02 | 3.620E-01 | 19.015  | 0.272  | 0.1159 | 9.992E-01 |
| ENSG00000169683 | LRRC45  | 43.980  | 0.617 | 2.769E-02 | 3.620E-01 | 24.351  | 0.047  | 0.7887 | 9.992E-01 |
| ENSG00000046647 | GEMIN8  | 41.261  | 0.619 | 2.801E-02 | 3.629E-01 | 29.194  | 0.134  | 0.4545 | 9.992E-01 |
| ENSG00000162924 | REL     | 142.828 | 0.542 | 2.795E-02 | 3.629E-01 | 102.767 | 0.149  | 0.4179 | 9.992E-01 |
| ENSG00000100116 | GCAT    | 117.587 | 0.552 | 2.872E-02 | 3.682E-01 | 79.705  | 0.286  | 0.1108 | 9.992E-01 |
| ENSG00000109099 | PMP22   | 171.674 | 0.569 | 2.884E-02 | 3.683E-01 | 88.887  | 0.129  | 0.4854 | 9.992E-01 |
| ENSG00000171174 | RBKS    | 106.284 | 0.562 | 2.919E-02 | 3.694E-01 | 59.571  | -0.031 | 0.8635 | 9.992E-01 |
| ENSG00000168952 | STXBP6  | 195.996 | 0.519 | 2.931E-02 | 3.694E-01 | 119.690 | 0.122  | 0.4724 | 9.992E-01 |
| ENSG00000111670 | GNPTAB  | 239.035 | 0.538 | 2.985E-02 | 3.715E-01 | 162.974 | 0.039  | 0.8212 | 9.992E-01 |
| ENSG00000169692 | AGPAT2  | 42.829  | 0.606 | 3.038E-02 | 3.755E-01 | 36.207  | -0.075 | 0.6842 | 9.992E-01 |
| ENSG00000165175 | MID1IP1 | 58.883  | 0.600 | 3.188E-02 | 3.821E-01 | 37.077  | 0.198  | 0.2849 | 9.992E-01 |
| ENSG00000104957 | CCDC130 | 220.559 | 0.517 | 3.257E-02 | 3.840E-01 | 131.911 | 0.112  | 0.5201 | 9.992E-01 |
| ENSG00000113916 | BCL6    | 138.393 | 0.535 | 3.269E-02 | 3.847E-01 | 88.163  | 0.418  | 0.0202 | 7.780E-01 |
| ENSG00000197857 | ZNF44   | 121.340 | 0.554 | 3.302E-02 | 3.855E-01 | 74.752  | 0.262  | 0.1545 | 9.992E-01 |

|                 |            |         |       |           |           |         |        |        |           |
|-----------------|------------|---------|-------|-----------|-----------|---------|--------|--------|-----------|
| ENSG00000121989 | ACVR2A     | 113.958 | 0.559 | 3.308E-02 | 3.856E-01 | 77.538  | 0.243  | 0.1866 | 9.992E-01 |
| ENSG00000226742 | HSBP1L1    | 111.201 | 0.544 | 3.338E-02 | 3.885E-01 | 84.070  | 0.029  | 0.8737 | 9.992E-01 |
| ENSG00000011243 | AKAP8L     | 42.749  | 0.594 | 3.381E-02 | 3.912E-01 | 27.128  | 0.086  | 0.6364 | 9.992E-01 |
| ENSG00000120725 | SIL1       | 145.458 | 0.551 | 3.529E-02 | 4.020E-01 | 73.593  | 0.124  | 0.4906 | 9.992E-01 |
| ENSG00000188051 | TMEM221    | 34.866  | 0.591 | 3.577E-02 | 4.063E-01 | 28.360  | 0.020  | 0.9105 | 9.992E-01 |
| ENSG00000184678 | HIST2H2BE  | 32.719  | 0.553 | 3.642E-02 | 4.105E-01 | 18.752  | -0.202 | 0.2428 | 9.992E-01 |
| ENSG00000054690 | PLEKHH1    | 33.228  | 0.583 | 3.704E-02 | 4.140E-01 | 23.038  | 0.017  | 0.9244 | 9.992E-01 |
| ENSG00000106384 | MOGAT3     | 176.778 | 0.528 | 3.704E-02 | 4.140E-01 | 117.133 | 0.037  | 0.8239 | 9.992E-01 |
| ENSG00000105483 | CARD8      | 102.469 | 0.554 | 3.737E-02 | 4.160E-01 | 73.444  | 0.022  | 0.9027 | 9.992E-01 |
| ENSG00000173212 | MAB21L3    | 48.138  | 0.583 | 3.768E-02 | 4.176E-01 | 27.110  | 0.032  | 0.8617 | 9.992E-01 |
| ENSG00000011422 | PLAUR      | 52.453  | 0.582 | 3.760E-02 | 4.176E-01 | 33.563  | 0.069  | 0.7047 | 9.992E-01 |
| ENSG00000171163 | ZNF692     | 53.259  | 0.585 | 3.782E-02 | 4.177E-01 | 37.511  | -0.069 | 0.7073 | 9.992E-01 |
| ENSG00000130173 | ANGPTL8    | 117.716 | 0.568 | 3.898E-02 | 4.211E-01 | 68.078  | 0.122  | 0.5076 | 9.992E-01 |
| ENSG00000134324 | LPIN1      | 103.579 | 0.563 | 3.942E-02 | 4.221E-01 | 79.581  | 0.144  | 0.4234 | 9.992E-01 |
| ENSG00000177854 | TMEM187    | 44.786  | 0.577 | 4.031E-02 | 4.256E-01 | 28.809  | 0.019  | 0.9157 | 9.992E-01 |
| ENSG00000131171 | SH3BGRL    | 41.368  | 0.577 | 4.036E-02 | 4.256E-01 | 19.418  | -0.050 | 0.7688 | 9.992E-01 |
| ENSG00000184178 | SCFD2      | 131.522 | 0.503 | 4.028E-02 | 4.256E-01 | 81.719  | 0.075  | 0.6748 | 9.992E-01 |
| ENSG00000099821 | POLRMT     | 126.405 | 0.537 | 4.051E-02 | 4.262E-01 | 86.425  | -0.054 | 0.7631 | 9.992E-01 |
| ENSG00000258457 | AL132780.2 | 47.008  | 0.576 | 4.083E-02 | 4.266E-01 | 32.602  | 0.258  | 0.1558 | 9.992E-01 |
| ENSG00000157077 | ZFYVE9     | 138.160 | 0.529 | 4.113E-02 | 4.277E-01 | 107.812 | 0.075  | 0.6652 | 9.992E-01 |
| ENSG00000104375 | STK3       | 44.296  | 0.570 | 4.280E-02 | 4.368E-01 | 44.829  | 0.197  | 0.2890 | 9.992E-01 |
| ENSG00000120054 | CPN1       | 97.075  | 0.514 | 4.421E-02 | 4.415E-01 | 66.412  | -0.117 | 0.5184 | 9.992E-01 |
| ENSG00000120370 | GORAB      | 39.109  | 0.557 | 4.480E-02 | 4.451E-01 | 25.747  | 0.299  | 0.0974 | 9.992E-01 |
| ENSG00000243364 | EFNA4      | 79.668  | 0.549 | 4.554E-02 | 4.499E-01 | 55.258  | -0.116 | 0.5313 | 9.992E-01 |
| ENSG00000023892 | DEF6       | 68.112  | 0.560 | 4.605E-02 | 4.525E-01 | 47.428  | 0.083  | 0.6546 | 9.992E-01 |
| ENSG00000105829 | BET1       | 77.448  | 0.534 | 4.672E-02 | 4.546E-01 | 61.382  | 0.259  | 0.1629 | 9.992E-01 |
| ENSG00000168874 | ATOH8      | 67.782  | 0.541 | 4.728E-02 | 4.569E-01 | 43.714  | 0.157  | 0.3994 | 9.992E-01 |
| ENSG00000174989 | FBXW8      | 47.188  | 0.552 | 4.877E-02 | 4.650E-01 | 22.272  | 0.356  | 0.0440 | 9.762E-01 |
| ENSG00000069667 | RORA       | 66.066  | 0.533 | 4.880E-02 | 4.650E-01 | 48.957  | 0.140  | 0.4512 | 9.992E-01 |

|                 |            |         |        |           |           |         |        |        |           |
|-----------------|------------|---------|--------|-----------|-----------|---------|--------|--------|-----------|
| ENSG00000125846 | ZNF133     | 101.594 | 0.521  | 4.891E-02 | 4.656E-01 | 64.503  | 0.446  | 0.0159 | 7.130E-01 |
| ENSG00000115137 | DNAJC27    | 34.053  | 0.536  | 4.942E-02 | 4.665E-01 | 22.139  | -0.154 | 0.3892 | 9.992E-01 |
| ENSG00000186020 | ZNF529     | 37.509  | 0.541  | 4.958E-02 | 4.668E-01 | 29.882  | 0.061  | 0.7373 | 9.992E-01 |
| ENSG00000121671 | CRY2       | 102.336 | 0.504  | 4.972E-02 | 4.668E-01 | 71.719  | 0.200  | 0.2757 | 9.992E-01 |
| ENSG00000188785 | ZNF548     | 59.294  | 0.538  | 5.023E-02 | 4.685E-01 | 29.904  | 0.421  | 0.0210 | 7.865E-01 |
| ENSG00000108239 | TBC1D12    | 73.454  | 0.529  | 5.060E-02 | 4.696E-01 | 58.109  | 0.120  | 0.5121 | 9.992E-01 |
| ENSG00000136840 | ST6GALNAC4 | 141.247 | 0.513  | 5.059E-02 | 4.696E-01 | 88.126  | 0.232  | 0.1960 | 9.992E-01 |
| ENSG00000196646 | ZNF136     | 37.631  | 0.548  | 5.176E-02 | 4.735E-01 | 29.398  | 0.222  | 0.2150 | 9.992E-01 |
| ENSG00000113070 | HBEGF      | 48.405  | 0.546  | 5.209E-02 | 4.738E-01 | 29.364  | 0.135  | 0.4586 | 9.992E-01 |
| ENSG00000102743 | SLC25A15   | 55.799  | 0.538  | 5.251E-02 | 4.753E-01 | 43.645  | 0.164  | 0.3762 | 9.992E-01 |
| ENSG00000169507 | SLC38A11   | 34.926  | 0.543  | 5.303E-02 | 4.771E-01 | 18.326  | -0.009 | 0.9543 | 9.992E-01 |
| ENSG00000172331 | BPGM       | 32.836  | 0.536  | 5.539E-02 | 4.857E-01 | 21.816  | -0.155 | 0.3852 | 9.992E-01 |
| ENSG00000106100 | NOD1       | 39.228  | 0.504  | 5.584E-02 | 4.881E-01 | 25.097  | 0.137  | 0.4455 | 9.992E-01 |
| ENSG00000196843 | ARID5A     | 70.931  | 0.532  | 5.716E-02 | 4.965E-01 | 47.232  | -0.203 | 0.2744 | 9.992E-01 |
| ENSG00000114745 | GORASP1    | 94.177  | 0.514  | 5.825E-02 | 4.999E-01 | 60.410  | 0.245  | 0.1801 | 9.992E-01 |
| ENSG00000087116 | ADAMTS2    | 43.264  | 0.531  | 5.918E-02 | 5.044E-01 | 26.610  | 0.080  | 0.6555 | 9.992E-01 |
| ENSG00000130270 | ATP8B3     | 46.988  | 0.530  | 5.990E-02 | 5.066E-01 | 32.525  | 0.015  | 0.9333 | 9.992E-01 |
| ENSG00000109323 | MANBA      | 89.174  | 0.513  | 5.978E-02 | 5.066E-01 | 70.087  | -0.192 | 0.3019 | 9.992E-01 |
| ENSG00000146232 | NFKBIE     | 105.159 | 0.505  | 6.029E-02 | 5.083E-01 | 60.035  | 0.147  | 0.4262 | 9.992E-01 |
| ENSG00000162129 | CLPB       | 77.398  | 0.516  | 6.102E-02 | 5.123E-01 | 62.453  | 0.283  | 0.1222 | 9.992E-01 |
| ENSG00000132256 | TRIM5      | 51.309  | 0.525  | 6.224E-02 | 5.160E-01 | 34.625  | -0.270 | 0.1461 | 9.992E-01 |
| ENSG00000149582 | TMEM25     | 41.217  | 0.521  | 6.422E-02 | 5.272E-01 | 28.448  | -0.041 | 0.8194 | 9.992E-01 |
| ENSG00000189057 | FAM111B    | 368.557 | -0.360 | 6.473E-02 | 5.279E-01 | 231.327 | -0.683 | 0.0000 | 1.247E-02 |
| ENSG00000215067 | ALOX12-AS1 | 45.722  | 0.519  | 6.506E-02 | 5.286E-01 | 26.697  | -0.081 | 0.6496 | 9.992E-01 |
| ENSG00000239382 | ALKBH6     | 56.164  | 0.513  | 6.778E-02 | 5.374E-01 | 39.248  | -0.181 | 0.3303 | 9.992E-01 |
| ENSG00000175895 | PLEKHF2    | 40.103  | 0.514  | 6.788E-02 | 5.378E-01 | 44.350  | -0.050 | 0.7863 | 9.992E-01 |
| ENSG00000112367 | FIG4       | 39.292  | 0.509  | 6.831E-02 | 5.404E-01 | 34.253  | 0.206  | 0.2661 | 9.992E-01 |
| ENSG00000184903 | IMMP2L     | 49.095  | 0.509  | 7.073E-02 | 5.454E-01 | 29.543  | 0.031  | 0.8651 | 9.992E-01 |
| ENSG00000132563 | REEP2      | 49.935  | 0.506  | 7.171E-02 | 5.476E-01 | 31.905  | 0.158  | 0.3885 | 9.992E-01 |



|                 |         |         |        |           |           |         |        |        |           |
|-----------------|---------|---------|--------|-----------|-----------|---------|--------|--------|-----------|
| ENSG00000143995 | MEIS1   | 30.631  | 0.503  | 7.191E-02 | 5.478E-01 | 20.914  | 0.234  | 0.1797 | 9.992E-01 |
| ENSG00000240616 | RPS6P25 | 42.573  | 0.501  | 7.533E-02 | 5.592E-01 | 31.196  | 0.086  | 0.6350 | 9.992E-01 |
| ENSG00000120675 | DNAJC15 | 329.355 | -0.299 | 1.309E-01 | 6.615E-01 | 194.121 | -0.544 | 0.0011 | 1.582E-01 |
| ENSG00000006576 | PHTF2   | 96.604  | -0.172 | 5.086E-01 | 8.956E-01 | 67.740  | -0.542 | 0.0032 | 3.113E-01 |

(Direct) predicted targets

**Table S8.** STRING clusters analysis of targets regulated by miR-200c-3p.

| Cluster number | Protein name |
|----------------|--------------|
| 1              | ABCG8        |
| 1              | ADAMTS2      |
| 1              | AFTPH        |
| 1              | AGPAT2       |
| 1              | ATP1B1       |
| 1              | ATP8B1       |
| 1              | ATP8B3       |
| 1              | C19orf80     |
| 1              | CDKN2AIP     |
| 1              | CETN3        |
| 1              | COASY        |
| 1              | COBLL1       |
| 1              | CYP4F12      |
| 1              | CYP4F3       |
| 1              | DDX39B       |
| 1              | DEF6         |
| 1              | DHX57        |
| 1              | DOCK6        |
| 1              | FMNL2        |
| 1              | FUT8         |
| 1              | GCAT         |
| 1              | GEMIN8       |
| 1              | GPHN         |
| 1              | GPS1         |
| 1              | GRASP        |
| 1              | GREB1        |
| 1              | HARBI1       |
| 1              | HES4         |
| 1              | HSBP1L1      |
| 1              | LPIN1        |
| 1              | MAB21L3      |
| 1              | MEIS1        |
| 1              | MOGAT3       |
| 1              | NOS1AP       |
| 1              | P4HA2        |
| 1              | PBX3         |
| 1              | PHTF2        |
| 1              | PIM3         |
| 1              | PLEKHF2      |
| 1              | RAB15        |
| 1              | REEP2        |

|   |          |
|---|----------|
| 1 | SAMD11   |
| 1 | SARNP    |
| 1 | SCAPER   |
| 1 | SLC22A7  |
| 1 | SLC35A1  |
| 1 | SLC38A11 |
| 1 | SLMO1    |
| 1 | SMIM1    |
| 1 | SPG20    |
| 1 | SPOP     |
| 1 | SREK1    |
| 1 | SRSF10   |
| 1 | STK3     |
| 1 | TARBP2   |
| 1 | TBC1D12  |
| 1 | TEAD4    |
| 1 | TMEM187  |
| 1 | TMEM51   |
| 1 | TOX3     |
| 1 | USP35    |
| 1 | USP53    |
| 1 | XRN1     |
| 1 | ZFAT     |
| 1 | ZNF326   |
| 1 | ZNF433   |
| 1 | ZNF608   |
| 1 | ZNF627   |
| 2 | ACVR2A   |
| 2 | ALKBH2   |
| 2 | ALKBH6   |
| 2 | ANKZF1   |
| 2 | BCL3     |
| 2 | CARD8    |
| 2 | CHD6     |
| 2 | CHORDC1  |
| 2 | CLPB     |
| 2 | CPN1     |
| 2 | CRIP2    |
| 2 | DNAJC15  |
| 2 | EFNA4    |
| 2 | ELP4     |
| 2 | ERCC5    |
| 2 | ETHE1    |

|   |           |
|---|-----------|
| 2 | FAM111B   |
| 2 | HDAC6     |
| 2 | HIST2H2BE |
| 2 | HSPA1B    |
| 2 | HSPH1     |
| 2 | IMMP2L    |
| 2 | INTS4     |
| 2 | KRI1      |
| 2 | MSH3      |
| 2 | MST1      |
| 2 | N6AMT1    |
| 2 | NFE2L2    |
| 2 | NFKBIE    |
| 2 | NOD1      |
| 2 | NRDE2     |
| 2 | NTMT1     |
| 2 | PAAF1     |
| 2 | PARD3B    |
| 2 | PARP2     |
| 2 | PHLPP1    |
| 2 | PMP22     |
| 2 | PROC      |
| 2 | PSMC1     |
| 2 | SDF2L1    |
| 2 | SIL1      |
| 2 | SIRT6     |
| 2 | SLC25A15  |
| 2 | SUGT1     |
| 2 | TBCD      |
| 2 | THUMPD2   |
| 2 | TMEM161B  |
| 2 | TMEM221   |
| 2 | TMEM263   |
| 2 | TMEM37    |
| 2 | TRIM5     |
| 2 | VSNL1     |
| 2 | XRCC1     |
| 2 | ZBTB18    |
| 2 | ZNF133    |
| 2 | ZNF44     |
| 2 | ZNF57     |
| 2 | ZNF775    |
| 3 | ARID5A    |

|   |           |
|---|-----------|
| 3 | ASTN2     |
| 3 | ATXN7L1   |
| 3 | BET1      |
| 3 | BPGM      |
| 3 | C6orf48   |
| 3 | CCDC130   |
| 3 | CCDC132   |
| 3 | CCDC144NL |
| 3 | DEPDC5    |
| 3 | DHX36     |
| 3 | DNAJC27   |
| 3 | DNMBP     |
| 3 | EML6      |
| 3 | EPC1      |
| 3 | FASTKD2   |
| 3 | FBXW8     |
| 3 | GLT8D1    |
| 3 | GORAB     |
| 3 | GORASP1   |
| 3 | H1FX      |
| 3 | HCFC2     |
| 3 | HIST1H1C  |
| 3 | INCENP    |
| 3 | IPO13     |
| 3 | KIFC2     |
| 3 | LARS2     |
| 3 | LRRC45    |
| 3 | METTL7B   |
| 3 | MT1A      |
| 3 | MT1B      |
| 3 | MTERF4    |
| 3 | NARFL     |
| 3 | NR2F1     |
| 3 | NUPR1     |
| 3 | PAQR7     |
| 3 | PBDC1     |
| 3 | PLEKHH1   |
| 3 | POLRMT    |
| 3 | PPP1R16A  |
| 3 | PPP1R9A   |
| 3 | PQLC2     |
| 3 | PRKCZ     |
| 3 | RBKS      |

|   |          |
|---|----------|
| 3 | RBM18    |
| 3 | RNF169   |
| 3 | ROGDI    |
| 3 | SCFD2    |
| 3 | SGK2     |
| 3 | SH3BGRL  |
| 3 | SIK1B    |
| 3 | STXBP6   |
| 3 | SUPT20H  |
| 3 | SYDE2    |
| 3 | TADA1    |
| 3 | TAF1C    |
| 3 | TMEM25   |
| 3 | UNC119   |
| 3 | ZBTB43   |
| 3 | ZNF529   |
| 3 | ZNF710   |
| 4 | AKAP8L   |
| 4 | ATOH8    |
| 4 | BCL2L11  |
| 4 | BCL6     |
| 4 | BCOR     |
| 4 | CEBPA    |
| 4 | CREB3L3  |
| 4 | CRY2     |
| 4 | CSRNP1   |
| 4 | CXorf23  |
| 4 | DDIT4    |
| 4 | FIG4     |
| 4 | FOXN2    |
| 4 | GADD45A  |
| 4 | GADD45B  |
| 4 | GNPTAB   |
| 4 | GPCPD1   |
| 4 | HBEGF    |
| 4 | HNRNPUL2 |
| 4 | IER2     |
| 4 | IQGAP2   |
| 4 | MANBA    |
| 4 | MGEA5    |
| 4 | MID1IP1  |
| 4 | MMP15    |
| 4 | MT1M     |

|   |            |
|---|------------|
| 4 | MXD1       |
| 4 | NFIL3      |
| 4 | NR2F2      |
| 4 | PELI1      |
| 4 | PLAUR      |
| 4 | PPP1R15A   |
| 4 | REL        |
| 4 | RHBG       |
| 4 | RND1       |
| 4 | RNF43      |
| 4 | RORA       |
| 4 | RYBP       |
| 4 | SIX1       |
| 4 | SNAI1      |
| 4 | ST6GALNAC4 |
| 4 | TBX3       |
| 4 | TET1       |
| 4 | TRPM4      |
| 4 | USP18      |
| 4 | UVRAG      |
| 4 | ZFYVE19    |
| 4 | ZFYVE9     |
| 4 | ZNF136     |
| 4 | ZNF548     |
| 4 | ZNF692     |
| 4 | ZRSR2      |
| 4 | ZSCAN2     |

**Table S9.** GO terms and KEGG pathways of STRING clusters of mRNAs regulated by miR-200c-3p.

| STRING Cluster | Category                   | Term       | Description                              | p-value    | Genes                                                          |
|----------------|----------------------------|------------|------------------------------------------|------------|----------------------------------------------------------------|
| 1              | GO Term Biological Process | GO:0019432 | triglyceride biosynthetic process        | 0.00457888 | MOGAT3, LPIN1, AGPAT2                                          |
|                | KEGG Pathway               | hsa04975   | Fat digestion and absorption             | 0.00535349 | ABCG8, MOGAT3, AGPAT2                                          |
|                | KEGG Pathway               | hsa00561   | Glycerolipid metabolism                  | 0.01401815 | MOGAT3, LPIN1, AGPAT2                                          |
|                | GO Term Biological Process | GO:0036101 | leukotriene B4 catabolic process         | 0.01449003 | CYP4F3, CYP4F12                                                |
|                | GO Term Molecular Function | GO:0050051 | leukotriene-B4 20-monooxygenase activity | 0.01580528 | CYP4F3, CYP4F12                                                |
|                | KEGG Pathway               | hsa04976   | Bile secretion                           | 0.0174584  | ABCG8, ATP1B1, SLC22A7                                         |
|                | GO Term Cellular Component | GO:0005783 | endoplasmic reticulum                    | 0.04191604 | PLEKHF2, PHTF2, ATP8B1, P4HA2, REEP2, SLC38A11, AGPAT2, SCAPER |



|   |                            |            |                                                                                                      |            |                             |
|---|----------------------------|------------|------------------------------------------------------------------------------------------------------|------------|-----------------------------|
| 2 | GO Term Biological Process | GO:0006284 | base-excision repair                                                                                 | 0.01077764 | PARP2, XRCC1, SIRT6         |
|   | KEGG Pathway               | hsa04621   | NOD-like receptor signaling pathway                                                                  | 0.01604278 | CARD8, NOD1, SUGT1          |
|   | GO Term Biological Process | GO:0036091 | positive regulation of transcription from RNA polymerase II promoter in response to oxidative stress | 0.01790665 | CHD6, NFE2L2                |
|   | GO Term Molecular Function | GO:0001221 | transcription cofactor binding                                                                       | 0.02201624 | CHD6, NFE2L2                |
|   | GO Term Molecular Function | GO:0008276 | protein methyltransferase activity                                                                   | 0.02636209 | N6AMT1, NTMT1               |
|   | KEGG Pathway               | hsa04141   | Protein processing in endoplasmic reticulum                                                          | 0.02919867 | HSPH1, SIL1, HSPA1B, c      |
|   | GO Term Biological Process | GO:0042981 | regulation of apoptotic process                                                                      | 0.03925872 | PHLPP1, SDF2L1, CARD8, NOD1 |
|   | GO Term Biological Process | GO:1900034 | regulation of cellular response to heat                                                              | 0.04272021 | HSPH1, CHORDC1, HSPA1B      |
|   | GO Term Molecular Function | GO:0051787 | misfolded protein binding                                                                            | 0.04780884 | SDF2L1, HDAC6               |
| 3 | GO Term Biological Process | GO:0006390 | transcription from mitochondrial promoter                                                            | 0.04084359 | MTERF4, POLRMT              |

|   |                                           |            |                                                                      |          |                                                                                       |
|---|-------------------------------------------|------------|----------------------------------------------------------------------|----------|---------------------------------------------------------------------------------------|
| 4 | <b>GO Term<br/>Biological<br/>Process</b> | GO:0000122 | negative regulation of transcription from RNA polymerase II promoter | 1.81E-05 | CEBPA, RYBP, BCL6, NFIL3, CRY2, SNAI1, REL, SIX1, BCOR, MXD1, ZNF136, TBX3            |
|   | <b>GO Term<br/>Molecular<br/>Function</b> | GO:0000977 | RNA polymerase II regulatory region sequence-specific DNA binding    | 3.57E-05 | CREB3L3, BCL6, NFIL3, SNAI1, ZNF548, RORA, ZSCAN2                                     |
|   | <b>GO Term<br/>Molecular<br/>Function</b> | GO:0003700 | transcription factor activity, sequence-specific DNA binding         | 5.26E-05 | CSRNP1, CEBPA, SIX1, RORA, FOXN2, TBX3, NFIL3, BCL6, ATOH8, ZNF548, REL, MXD1, ZSCAN2 |

|  |                                  |            |                    |            |                                                                                                                                                                                                                                                            |
|--|----------------------------------|------------|--------------------|------------|------------------------------------------------------------------------------------------------------------------------------------------------------------------------------------------------------------------------------------------------------------|
|  | GO Term<br>Cellular<br>Component | GO:0005634 | nucleus            | 8.57E-04   | CSRN1P1, CEBPA,<br>ZNF692, MT1M,<br>AKAP8L, SIX1, RORA,<br>USP18, CREB3L3,<br>NFIL3, ATOH8,<br>ZNF548, IER2, MGEA5,<br>GADD45B, GADD45A,<br>MID1IP1, TET1,<br>FOXN2, TBX3, BCL6,<br>HNRNPUL2, CRY2,<br>PELI1, REL, SNAI1,<br>BCOR, MXD1, ZNF136,<br>ZSCAN2 |
|  | GO Term<br>Biological<br>Process | GO:0060021 | palate development | 0.00153302 | CSRN1P1, SNAI1,<br>BCOR, TBX3                                                                                                                                                                                                                              |

|  |                                           |            |                                                                                                                  |            |                                                                                                                    |
|--|-------------------------------------------|------------|------------------------------------------------------------------------------------------------------------------|------------|--------------------------------------------------------------------------------------------------------------------|
|  | <b>GO Term<br/>Molecular<br/>Function</b> | GO:0043565 | sequence-specific DNA binding                                                                                    | 0.00263852 | CSRNP1, BCL6, NFIL3,<br>SIX1, RORA, FOXN2,<br>TBX3                                                                 |
|  | <b>GO Term<br/>Biological<br/>Process</b> | GO:0006351 | transcription, DNA-templated                                                                                     | 0.00357154 | CEBPA, ZNF692,<br>AKAP8L, TET1, RORA,<br>FOXN2, TBX3, RYBP,<br>BCL6, CRY2, ATOH8,<br>ZNF548, BCOR, MXD1,<br>ZSCAN2 |
|  | <b>GO Term<br/>Molecular<br/>Function</b> | GO:0001078 | transcriptional repressor activity, RNA polymerase II core<br>promoter proximal region sequence-specific binding | 0.0046153  | NFIL3, SNAI1, MXD1,<br>TBX3                                                                                        |
|  | <b>GO Term<br/>Biological<br/>Process</b> | GO:0006366 | transcription from RNA polymerase II promoter                                                                    | 0.00492488 | CEBPA, CSRNP1,<br>CREB3L3, NFIL3, REL,<br>SIX1, ZNF136                                                             |
|  | <b>GO Term<br/>Molecular<br/>Function</b> | GO:0003714 | transcription corepressor activity                                                                               | 0.00496159 | RYBP, NFIL3, BCOR,<br>MXD1, ZNF136                                                                                 |

|  |                                           |            |                                                                                                                    |            |                                                                   |
|--|-------------------------------------------|------------|--------------------------------------------------------------------------------------------------------------------|------------|-------------------------------------------------------------------|
|  | <b>GO Term<br/>Biological<br/>Process</b> | GO:0006915 | apoptotic process                                                                                                  | 0.01103731 | PPP1R15A, CSRN1P1,<br>BCL2L11, RYBP,<br>GADD45B, GADD45A,<br>SIX1 |
|  | <b>KEGG<br/>Pathway</b>                   | hsa04068   | FoxO signaling pathway                                                                                             | 0.02064351 | BCL2L11, GADD45B,<br>BCL6, GADD45A                                |
|  | <b>KEGG<br/>Pathway</b>                   | hsa05202   | Transcriptional misregulation in cancer                                                                            | 0.02420337 | CEBPA, BCL6, REL,<br>SIX1                                         |
|  | <b>GO Term<br/>Molecular<br/>Function</b> | GO:0001228 | transcriptional activator activity, RNA polymerase II<br>transcription regulatory region sequence-specific binding | 0.02457282 | CEBPA, CSRN1P1,<br>CREB3L3                                        |
|  | <b>GO Term<br/>Biological<br/>Process</b> | GO:0045892 | negative regulation of transcription, DNA-templated                                                                | 0.02593007 | CEBPA, BCL6, CRY2,<br>ATOH8, BCOR, TBX3                           |
|  | <b>GO Term<br/>Biological<br/>Process</b> | GO:0032515 | negative regulation of phosphoprotein phosphatase activity                                                         | 0.0293568  | PPP1R15A, CRY2                                                    |
|  | <b>GO Term<br/>Biological<br/>Process</b> | GO:0030502 | negative regulation of bone mineralization                                                                         | 0.0293568  | BCOR, TRPM4                                                       |

|  |                                           |            |                                                                      |            |                                                                |
|--|-------------------------------------------|------------|----------------------------------------------------------------------|------------|----------------------------------------------------------------|
|  | <b>GO Term<br/>Biological<br/>Process</b> | GO:0045944 | positive regulation of transcription from RNA polymerase II promoter | 0.02961083 | CEBPA, CSRNPI,<br>CREB3L3, AKAP8L,<br>REL, TET1, SIX1,<br>RORA |
|  | <b>GO Term<br/>Biological<br/>Process</b> | GO:0045893 | positive regulation of transcription, DNA-templated                  | 0.03007585 | ATOH8, SNAI1, SIX1,<br>RORA, FOXN2, TBX3                       |
|  | <b>GO Term<br/>Biological<br/>Process</b> | GO:0035148 | tube formation                                                       | 0.03348111 | BCL2L11, ATOH8                                                 |
|  | <b>GO Term<br/>Biological<br/>Process</b> | GO:1900745 | positive regulation of p38MAPK cascade                               | 0.03758825 | GADD45B, GADD45A                                               |
|  | <b>GO Term<br/>Biological<br/>Process</b> | GO:0031065 | positive regulation of histone deacetylation                         | 0.0457513  | BCL6, AKAP8L                                                   |
|  | <b>GO Term<br/>Biological<br/>Process</b> | GO:0035518 | histone H2A monoubiquitination                                       | 0.0457513  | RYBP, BCOR                                                     |
|  | <b>GO Term<br/>Biological<br/>Process</b> | GO:0000185 | activation of MAPKKK activity                                        | 0.0457513  | GADD45B, GADD45A                                               |

|  |                                           |            |             |            |                                                                                   |
|--|-------------------------------------------|------------|-------------|------------|-----------------------------------------------------------------------------------|
|  | <b>GO Term<br/>Molecular<br/>Function</b> | GO:0003677 | DNA binding | 0.04863604 | CEBPA, ZNF692,<br>RYBP, NFIL3, CRY2,<br>AKAP8L, SIX1, RORA,<br>ZNF136, IER2, TBX3 |
|--|-------------------------------------------|------------|-------------|------------|-----------------------------------------------------------------------------------|

**Table S10.** Expression data of regulated genes by miR-222-5p. Direct predicted miRNA targets are highlighted in orange

| Ensembl ID      | Gene name | M-miR-222-5p (Sorafenib-Control) |                                |           |           | Transfection Control (Sorafenib-Control) |                                |           |           |
|-----------------|-----------|----------------------------------|--------------------------------|-----------|-----------|------------------------------------------|--------------------------------|-----------|-----------|
|                 |           | Base mean                        | log <sub>2</sub> (Fold-Change) | p-value   | p-adj     | Base mean                                | log <sub>2</sub> (Fold-Change) | p-value   | p-adj     |
| ENSG00000210049 | MT-TF     | 4742.611                         | -1.187                         | 1.970E-09 | 4.367E-07 | 4251.805                                 | -0.458                         | 4.789E-02 | 2.379E-01 |
| ENSG00000175745 | NR2F1     | 525.445                          | -0.934                         | 3.225E-06 | 1.963E-04 | 490.637                                  | -0.330                         | 9.344E-02 | 3.392E-01 |
| ENSG00000182810 | DDX28     | 117.299                          | -1.551                         | 5.607E-06 | 3.108E-04 | 112.201                                  | -0.426                         | 2.044E-01 | 5.062E-01 |
| ENSG00000100350 | FOXRED2   | 1060.344                         | -0.792                         | 8.301E-06 | 4.316E-04 | 1038.487                                 | -0.429                         | 2.853E-02 | 1.788E-01 |
| ENSG00000198938 | MT-CO3    | 107358.661                       | -0.745                         | 1.059E-05 | 5.116E-04 | 109696.284                               | -0.439                         | 4.087E-03 | 5.641E-02 |
| ENSG00000109084 | TMEM97    | 1104.867                         | -0.800                         | 2.648E-05 | 1.098E-03 | 1105.823                                 | -0.495                         | 2.077E-02 | 1.514E-01 |
| ENSG00000102921 | N4BP1     | 237.785                          | -1.138                         | 2.816E-05 | 1.146E-03 | 307.386                                  | -0.399                         | 1.108E-01 | 3.723E-01 |
| ENSG00000168517 | HEXIM2    | 220.412                          | -1.154                         | 3.077E-05 | 1.238E-03 | 186.252                                  | -0.384                         | 1.626E-01 | 4.534E-01 |
| ENSG00000189306 | RRP7A     | 366.993                          | -0.902                         | 3.151E-05 | 1.263E-03 | 302.024                                  | -0.472                         | 6.955E-02 | 2.888E-01 |
| ENSG00000146830 | GIGYF1    | 173.493                          | -1.221                         | 3.684E-05 | 1.435E-03 | 179.492                                  | -0.257                         | 4.089E-01 | 7.033E-01 |
| ENSG00000174804 | FZD4      | 422.517                          | -1.025                         | 4.396E-05 | 1.647E-03 | 458.381                                  | -0.478                         | 3.178E-02 | 1.905E-01 |
| ENSG00000100104 | SRRD      | 113.113                          | -1.421                         | 4.501E-05 | 1.675E-03 | 114.801                                  | -0.208                         | 4.768E-01 | 7.494E-01 |
| ENSG00000177225 | GATD1     | 175.341                          | -1.137                         | 4.586E-05 | 1.684E-03 | 148.995                                  | -0.430                         | 1.465E-01 | 4.326E-01 |
| ENSG00000124217 | MOCS3     | 68.177                           | -1.542                         | 5.302E-05 | 1.858E-03 | 59.152                                   | -0.274                         | 4.247E-01 | 7.133E-01 |
| ENSG00000167034 | NKX3-1    | 107.194                          | -1.279                         | 7.000E-05 | 2.303E-03 | 72.147                                   | -0.488                         | 1.494E-01 | 4.367E-01 |
| ENSG00000173894 | CBX2      | 89.985                           | -1.282                         | 7.655E-05 | 2.475E-03 | 71.295                                   | -0.386                         | 2.764E-01 | 5.867E-01 |
| ENSG00000107819 | SFXN3     | 107.867                          | -1.392                         | 1.147E-04 | 3.454E-03 | 151.600                                  | -0.450                         | 1.482E-01 | 4.353E-01 |
| ENSG00000167258 | CDK12     | 955.334                          | -0.677                         | 1.568E-04 | 4.357E-03 | 1044.457                                 | -0.480                         | 1.561E-02 | 1.278E-01 |
| ENSG00000080839 | RBL1      | 167.826                          | -1.103                         | 1.627E-04 | 4.475E-03 | 195.646                                  | -0.290                         | 3.088E-01 | 6.185E-01 |
| ENSG00000149948 | HMGA2     | 2654.131                         | -0.658                         | 1.752E-04 | 4.722E-03 | 2011.393                                 | -0.296                         | 1.010E-01 | 3.556E-01 |
| ENSG00000068654 | POLR1A    | 245.926                          | -0.891                         | 1.798E-04 | 4.823E-03 | 251.565                                  | -0.351                         | 1.803E-01 | 4.780E-01 |
| ENSG00000213588 | ZBTB9     | 47.149                           | -1.455                         | 1.899E-04 | 5.044E-03 | 50.393                                   | -0.448                         | 2.392E-01 | 5.465E-01 |



|                 |            |          |        |           |           |          |        |           |           |
|-----------------|------------|----------|--------|-----------|-----------|----------|--------|-----------|-----------|
| ENSG00000159202 | UBE2Z      | 1144.733 | -0.727 | 1.984E-04 | 5.208E-03 | 1271.739 | -0.422 | 4.840E-02 | 2.390E-01 |
| ENSG00000064393 | HIPK2      | 616.275  | -0.738 | 2.008E-04 | 5.257E-03 | 888.612  | -0.385 | 3.538E-02 | 2.023E-01 |
| ENSG00000107984 | DKK1       | 562.484  | -1.079 | 2.562E-04 | 6.384E-03 | 398.448  | -0.364 | 3.832E-01 | 6.828E-01 |
| ENSG00000278133 | AC135050.6 | 87.735   | -1.187 | 2.575E-04 | 6.401E-03 | 69.214   | -0.316 | 3.641E-01 | 6.689E-01 |
| ENSG00000100650 | SRSF5      | 933.290  | -0.654 | 2.605E-04 | 6.447E-03 | 954.029  | -0.306 | 1.775E-01 | 4.737E-01 |
| ENSG00000125871 | MGME1      | 336.409  | -0.798 | 2.620E-04 | 6.461E-03 | 351.306  | -0.274 | 2.035E-01 | 5.056E-01 |
| ENSG00000135744 | AGT        | 3897.554 | -0.538 | 2.741E-04 | 6.723E-03 | 3829.611 | -0.499 | 5.436E-03 | 6.731E-02 |
| ENSG00000117632 | STMN1      | 1429.239 | -0.791 | 2.783E-04 | 6.764E-03 | 1998.171 | -0.268 | 9.516E-02 | 3.426E-01 |
| ENSG00000180767 | CHST13     | 805.950  | -0.928 | 2.875E-04 | 6.942E-03 | 692.704  | -0.271 | 4.872E-01 | 7.532E-01 |
| ENSG00000168906 | MAT2A      | 329.206  | -0.800 | 3.312E-04 | 7.789E-03 | 311.060  | -0.496 | 8.630E-02 | 3.250E-01 |
| ENSG00000245848 | CEBPA      | 699.184  | -0.713 | 3.466E-04 | 8.064E-03 | 669.885  | -0.163 | 5.099E-01 | 7.678E-01 |
| ENSG00000108924 | HLF        | 1465.401 | -0.660 | 3.519E-04 | 8.151E-03 | 1419.633 | -0.436 | 1.697E-02 | 1.334E-01 |
| ENSG00000108375 | RNF43      | 407.890  | -0.822 | 3.895E-04 | 8.779E-03 | 430.778  | -0.426 | 4.798E-02 | 2.381E-01 |
| ENSG00000179922 | ZNF784     | 69.718   | -1.348 | 4.139E-04 | 9.216E-03 | 43.979   | 0.046  | 8.996E-01 | 9.629E-01 |
| ENSG00000149573 | MPZL2      | 651.151  | -0.714 | 4.448E-04 | 9.645E-03 | 478.439  | -0.066 | 7.980E-01 | 9.188E-01 |
| ENSG00000204444 | APOM       | 369.859  | -0.740 | 4.918E-04 | 1.044E-02 | 373.720  | -0.266 | 2.229E-01 | 5.276E-01 |
| ENSG00000180425 | C11orf71   | 64.617   | -1.267 | 5.379E-04 | 1.117E-02 | 64.387   | -0.374 | 3.306E-01 | 6.380E-01 |
| ENSG00000114491 | UMPS       | 361.368  | -0.815 | 5.535E-04 | 1.143E-02 | 329.663  | -0.452 | 5.766E-02 | 2.633E-01 |
| ENSG00000205730 | ITPRIPL2   | 245.291  | -0.887 | 5.574E-04 | 1.149E-02 | 235.247  | -0.428 | 8.122E-02 | 3.152E-01 |
| ENSG00000123353 | ORMDL2     | 95.118   | -1.172 | 6.184E-04 | 1.241E-02 | 151.121  | -0.230 | 4.266E-01 | 7.144E-01 |
| ENSG00000172831 | CES2       | 717.496  | -0.641 | 6.313E-04 | 1.254E-02 | 721.398  | -0.392 | 3.223E-02 | 1.916E-01 |
| ENSG00000266402 | SNHG25     | 2786.536 | -0.627 | 6.288E-04 | 1.254E-02 | 1768.011 | -0.448 | 2.512E-01 | 5.602E-01 |
| ENSG00000198700 | IPO9       | 542.092  | -0.628 | 6.475E-04 | 1.277E-02 | 490.359  | -0.161 | 4.337E-01 | 7.186E-01 |
| ENSG00000167670 | CHAF1A     | 302.089  | -0.754 | 6.712E-04 | 1.316E-02 | 255.734  | -0.316 | 2.396E-01 | 5.469E-01 |
| ENSG00000123131 | PRDX4      | 468.707  | -0.693 | 7.668E-04 | 1.451E-02 | 524.397  | -0.028 | 8.984E-01 | 9.626E-01 |
| ENSG00000236104 | ZBTB22     | 30.619   | -1.462 | 8.160E-04 | 1.518E-02 | 31.731   | -0.317 | 4.244E-01 | 7.132E-01 |
| ENSG00000003436 | TFPI       | 1513.542 | -0.640 | 8.147E-04 | 1.518E-02 | 1417.713 | -0.187 | 2.779E-01 | 5.882E-01 |

|                 |          |          |        |           |           |          |        |           |           |
|-----------------|----------|----------|--------|-----------|-----------|----------|--------|-----------|-----------|
| ENSG00000112146 | FBXO9    | 451.207  | -0.726 | 8.199E-04 | 1.523E-02 | 495.009  | -0.422 | 3.676E-02 | 2.063E-01 |
| ENSG00000185127 | C6orf120 | 108.133  | -1.036 | 8.407E-04 | 1.556E-02 | 83.519   | -0.414 | 2.324E-01 | 5.377E-01 |
| ENSG00000123562 | MORF4L2  | 1129.165 | -0.591 | 8.474E-04 | 1.566E-02 | 1331.210 | -0.216 | 2.128E-01 | 5.165E-01 |
| ENSG00000185219 | ZNF445   | 136.731  | -0.955 | 9.017E-04 | 1.625E-02 | 144.674  | -0.471 | 1.259E-01 | 4.004E-01 |
| ENSG00000210191 | MT-TL2   | 33.987   | -1.452 | 9.574E-04 | 1.700E-02 | 27.070   | -1.108 | 8.291E-03 | 8.718E-02 |
| ENSG00000149357 | LAMTOR1  | 1299.938 | -0.593 | 1.009E-03 | 1.768E-02 | 1368.936 | -0.270 | 1.757E-01 | 4.715E-01 |
| ENSG00000101003 | GIN51    | 178.643  | -0.913 | 1.117E-03 | 1.905E-02 | 195.926  | -0.445 | 9.680E-02 | 3.462E-01 |
| ENSG00000100387 | RBX1     | 687.616  | -0.730 | 1.117E-03 | 1.905E-02 | 613.732  | -0.411 | 6.458E-02 | 2.785E-01 |
| ENSG00000144034 | TPRKB    | 146.367  | -1.080 | 1.141E-03 | 1.938E-02 | 255.173  | -0.114 | 6.493E-01 | 8.485E-01 |
| ENSG00000250799 | PRODH2   | 47.808   | -1.324 | 1.152E-03 | 1.946E-02 | 44.969   | -0.406 | 2.977E-01 | 6.079E-01 |
| ENSG00000169951 | ZNF764   | 49.129   | -1.265 | 1.184E-03 | 1.981E-02 | 62.052   | 0.071  | 8.458E-01 | 9.409E-01 |
| ENSG00000181896 | ZNF101   | 106.176  | -0.998 | 1.187E-03 | 1.982E-02 | 102.219  | -0.246 | 4.302E-01 | 7.167E-01 |
| ENSG00000198736 | MSRB1    | 322.260  | -0.793 | 1.195E-03 | 1.985E-02 | 356.325  | -0.428 | 8.741E-02 | 3.279E-01 |
| ENSG00000108679 | LGALS3BP | 768.639  | -0.580 | 1.201E-03 | 1.992E-02 | 656.215  | -0.492 | 8.453E-02 | 3.213E-01 |
| ENSG00000126062 | TMEM115  | 115.864  | -1.022 | 1.208E-03 | 1.998E-02 | 98.272   | -0.038 | 9.069E-01 | 9.656E-01 |
| ENSG00000134419 | RPS15A   | 6075.332 | 0.498  | 1.232E-03 | 2.024E-02 | 6136.382 | 0.521  | 2.658E-03 | 4.173E-02 |
| ENSG00000184232 | OAF      | 631.179  | -0.596 | 1.245E-03 | 2.037E-02 | 511.316  | -0.333 | 1.378E-01 | 4.195E-01 |
| ENSG00000101361 | NOP56    | 3480.746 | -0.531 | 1.296E-03 | 2.095E-02 | 3274.251 | -0.275 | 1.230E-01 | 3.936E-01 |
| ENSG00000078142 | PIK3C3   | 121.365  | -1.082 | 1.317E-03 | 2.122E-02 | 152.293  | -0.322 | 2.678E-01 | 5.776E-01 |
| ENSG00000081913 | PHLPP1   | 213.828  | -0.854 | 1.384E-03 | 2.195E-02 | 277.579  | -0.218 | 4.152E-01 | 7.077E-01 |
| ENSG00000117899 | MESD     | 1312.161 | -0.602 | 1.405E-03 | 2.218E-02 | 942.079  | -0.358 | 1.472E-01 | 4.339E-01 |
| ENSG00000103257 | SLC7A5   | 645.677  | -0.602 | 1.425E-03 | 2.244E-02 | 1066.055 | -0.072 | 7.809E-01 | 9.110E-01 |
| ENSG00000125398 | SOX9     | 1224.268 | -0.748 | 1.450E-03 | 2.271E-02 | 1021.969 | -0.387 | 5.968E-02 | 2.691E-01 |
| ENSG00000237649 | KIFC1    | 359.784  | -0.778 | 1.462E-03 | 2.285E-02 | 267.084  | -0.348 | 1.540E-01 | 4.423E-01 |
| ENSG00000130511 | SSBP4    | 243.009  | -0.749 | 1.471E-03 | 2.292E-02 | 277.096  | -0.250 | 2.811E-01 | 5.921E-01 |
| ENSG00000170439 | METTL7B  | 66.914   | -1.123 | 1.512E-03 | 2.350E-02 | 66.735   | -0.457 | 2.245E-01 | 5.291E-01 |
| ENSG00000167700 | MFSD3    | 260.060  | -0.854 | 1.624E-03 | 2.485E-02 | 262.235  | -0.360 | 1.961E-01 | 4.975E-01 |

|                 |          |          |        |           |           |          |        |           |           |
|-----------------|----------|----------|--------|-----------|-----------|----------|--------|-----------|-----------|
| ENSG00000166997 | CNPY4    | 39.570   | -1.287 | 1.657E-03 | 2.515E-02 | 39.548   | -0.076 | 8.535E-01 | 9.443E-01 |
| ENSG00000134057 | CCNB1    | 492.148  | -0.670 | 1.660E-03 | 2.515E-02 | 501.523  | -0.140 | 5.618E-01 | 7.999E-01 |
| ENSG00000198734 | F5       | 297.619  | -0.759 | 1.749E-03 | 2.610E-02 | 373.899  | -0.222 | 3.125E-01 | 6.222E-01 |
| ENSG00000250722 | SELENOP  | 2465.808 | -0.654 | 1.767E-03 | 2.623E-02 | 1868.120 | -0.205 | 2.675E-01 | 5.775E-01 |
| ENSG00000114993 | RTKN     | 446.456  | -0.631 | 1.785E-03 | 2.633E-02 | 380.410  | -0.289 | 2.513E-01 | 5.602E-01 |
| ENSG00000177700 | POLR2L   | 1000.450 | -0.617 | 1.803E-03 | 2.633E-02 | 943.608  | -0.310 | 1.889E-01 | 4.878E-01 |
| ENSG00000198642 | KLHL9    | 208.124  | -0.856 | 1.828E-03 | 2.635E-02 | 193.724  | -0.388 | 1.803E-01 | 4.780E-01 |
| ENSG00000130193 | THEM6    | 457.575  | -0.687 | 1.820E-03 | 2.635E-02 | 461.962  | -0.475 | 2.935E-02 | 1.819E-01 |
| ENSG00000015532 | XYLT2    | 78.747   | -1.101 | 1.937E-03 | 2.736E-02 | 66.791   | -0.477 | 1.510E-01 | 4.384E-01 |
| ENSG00000197062 | ZSCAN26  | 44.013   | -1.226 | 1.993E-03 | 2.791E-02 | 34.908   | -0.157 | 6.536E-01 | 8.507E-01 |
| ENSG00000115275 | MOGS     | 242.284  | -0.991 | 1.994E-03 | 2.791E-02 | 347.258  | -0.429 | 6.860E-02 | 2.870E-01 |
| ENSG00000103266 | STUB1    | 312.397  | -0.824 | 2.008E-03 | 2.807E-02 | 289.479  | 0.088  | 7.485E-01 | 8.955E-01 |
| ENSG00000170522 | ELOVL6   | 116.074  | -0.903 | 2.132E-03 | 2.943E-02 | 111.235  | -0.398 | 1.788E-01 | 4.755E-01 |
| ENSG00000007968 | E2F2     | 63.955   | -1.096 | 2.150E-03 | 2.961E-02 | 49.943   | -0.122 | 7.394E-01 | 8.920E-01 |
| ENSG00000063322 | MED29    | 86.949   | -0.978 | 2.187E-03 | 2.997E-02 | 117.251  | -0.254 | 4.191E-01 | 7.095E-01 |
| ENSG00000159166 | LAD1     | 416.028  | -0.681 | 2.191E-03 | 2.998E-02 | 317.183  | 0.133  | 6.385E-01 | 8.432E-01 |
| ENSG00000244509 | APOBEC3C | 595.521  | -0.555 | 2.249E-03 | 3.055E-02 | 479.772  | -0.308 | 1.213E-01 | 3.907E-01 |
| ENSG00000102934 | PLLP     | 303.738  | -0.817 | 2.256E-03 | 3.061E-02 | 256.481  | 0.006  | 9.861E-01 | 9.945E-01 |
| ENSG00000174851 | YIF1A    | 485.482  | -0.667 | 2.272E-03 | 3.078E-02 | 515.426  | -0.322 | 1.632E-01 | 4.540E-01 |
| ENSG00000224186 | C5orf66  | 31.180   | -1.285 | 2.290E-03 | 3.094E-02 | 23.037   | -0.282 | 4.963E-01 | 7.587E-01 |
| ENSG00000090889 | KIF4A    | 342.431  | -0.695 | 2.316E-03 | 3.122E-02 | 374.999  | -0.336 | 1.290E-01 | 4.049E-01 |
| ENSG00000130770 | ATP5IF1  | 1071.793 | -0.531 | 2.413E-03 | 3.210E-02 | 916.487  | -0.052 | 7.703E-01 | 9.054E-01 |
| ENSG00000161981 | SNRNP25  | 378.961  | -0.654 | 2.422E-03 | 3.214E-02 | 360.682  | -0.111 | 6.308E-01 | 8.398E-01 |
| ENSG00000118785 | SPP1     | 1353.291 | -0.700 | 2.450E-03 | 3.232E-02 | 938.999  | -0.013 | 9.507E-01 | 9.818E-01 |
| ENSG00000174243 | DDX23    | 298.658  | -0.753 | 2.511E-03 | 3.271E-02 | 292.728  | -0.181 | 4.606E-01 | 7.386E-01 |
| ENSG00000117335 | CD46     | 296.189  | -0.712 | 2.550E-03 | 3.310E-02 | 260.162  | -0.490 | 3.887E-02 | 2.127E-01 |
| ENSG00000139291 | TMEM19   | 107.575  | -0.933 | 2.581E-03 | 3.345E-02 | 110.915  | 0.156  | 5.841E-01 | 8.131E-01 |

|                 |              |           |        |           |           |           |        |           |           |
|-----------------|--------------|-----------|--------|-----------|-----------|-----------|--------|-----------|-----------|
| ENSG00000215271 | HOMER        | 33.805    | -1.314 | 2.610E-03 | 3.368E-02 | 28.741    | -0.936 | 1.944E-02 | 1.465E-01 |
| ENSG00000165478 | HEPACAM      | 54.243    | -1.214 | 2.655E-03 | 3.401E-02 | 28.123    | -0.617 | 1.352E-01 | 4.154E-01 |
| ENSG00000103061 | SLC7A6OS     | 317.451   | -0.635 | 2.662E-03 | 3.407E-02 | 299.530   | 0.028  | 9.075E-01 | 9.658E-01 |
| ENSG00000272565 | RP11-485G4.2 | 34.164    | -1.225 | 2.796E-03 | 3.541E-02 | 27.438    | -0.664 | 1.139E-01 | 3.779E-01 |
| ENSG00000239306 | RBM14        | 192.790   | -0.837 | 3.019E-03 | 3.748E-02 | 216.624   | -0.237 | 3.413E-01 | 6.489E-01 |
| ENSG00000117601 | SERPINC1     | 225.386   | -0.828 | 3.059E-03 | 3.782E-02 | 307.813   | -0.201 | 4.420E-01 | 7.229E-01 |
| ENSG00000070718 | AP3M2        | 107.936   | -1.099 | 3.141E-03 | 3.865E-02 | 121.100   | -0.458 | 1.055E-01 | 3.631E-01 |
| ENSG00000104442 | ARMC1        | 457.338   | -0.652 | 3.152E-03 | 3.874E-02 | 564.634   | -0.137 | 5.586E-01 | 7.979E-01 |
| ENSG00000278540 | ACACA        | 270.587   | -0.710 | 3.253E-03 | 3.949E-02 | 281.619   | -0.324 | 1.648E-01 | 4.571E-01 |
| ENSG00000090905 | TNRC6A       | 934.726   | -0.541 | 3.292E-03 | 3.987E-02 | 883.896   | -0.270 | 1.374E-01 | 4.188E-01 |
| ENSG00000160209 | PDXK         | 612.500   | -0.586 | 3.317E-03 | 4.000E-02 | 509.687   | -0.337 | 9.795E-02 | 3.485E-01 |
| ENSG00000134575 | ACP2         | 158.680   | -0.895 | 3.365E-03 | 4.034E-02 | 164.139   | -0.481 | 1.290E-01 | 4.049E-01 |
| ENSG00000198888 | MT-ND1       | 32059.948 | 0.488  | 3.371E-03 | 4.034E-02 | 28784.811 | 0.589  | 1.917E-03 | 3.369E-02 |
| ENSG00000243955 | GSTA1        | 130.878   | -0.835 | 3.463E-03 | 4.094E-02 | 112.277   | -0.446 | 1.649E-01 | 4.571E-01 |
| ENSG00000168802 | CHTF8        | 525.797   | -0.582 | 3.464E-03 | 4.094E-02 | 490.433   | -0.400 | 4.929E-02 | 2.414E-01 |
| ENSG00000185088 | RPS27L       | 3165.038  | -0.558 | 3.452E-03 | 4.094E-02 | 3442.531  | -0.307 | 1.877E-01 | 4.870E-01 |
| ENSG00000166135 | HIF1AN       | 317.493   | -0.682 | 3.607E-03 | 4.227E-02 | 176.218   | -0.405 | 1.924E-01 | 4.932E-01 |
| ENSG00000144045 | DQX1         | 144.372   | -0.888 | 3.798E-03 | 4.379E-02 | 111.381   | -0.290 | 3.568E-01 | 6.628E-01 |
| ENSG00000177971 | IMP3         | 1172.652  | -0.730 | 3.798E-03 | 4.379E-02 | 1843.622  | -0.470 | 9.916E-03 | 9.753E-02 |
| ENSG00000139437 | TCHP         | 216.850   | -0.706 | 3.790E-03 | 4.379E-02 | 220.369   | -0.381 | 1.210E-01 | 3.906E-01 |
| ENSG00000244187 | TMEM141      | 880.169   | -0.545 | 3.830E-03 | 4.394E-02 | 766.919   | -0.463 | 1.896E-02 | 1.440E-01 |
| ENSG00000178988 | MRFAP1L1     | 1274.383  | -0.718 | 3.842E-03 | 4.403E-02 | 1453.757  | -0.139 | 7.234E-01 | 8.855E-01 |
| ENSG00000136478 | TEX2         | 172.154   | -0.769 | 3.877E-03 | 4.434E-02 | 166.261   | -0.453 | 1.039E-01 | 3.607E-01 |
| ENSG00000155850 | SLC26A2      | 101.119   | -0.987 | 4.049E-03 | 4.582E-02 | 125.792   | -0.358 | 2.038E-01 | 5.056E-01 |
| ENSG00000162063 | CCNF         | 267.175   | -0.720 | 4.208E-03 | 4.687E-02 | 215.469   | -0.393 | 1.463E-01 | 4.323E-01 |
| ENSG00000163882 | POLR2H       | 260.069   | -0.740 | 4.310E-03 | 4.789E-02 | 351.366   | -0.011 | 9.639E-01 | 9.849E-01 |
| ENSG00000136848 | DAB2IP       | 174.632   | -0.784 | 4.318E-03 | 4.793E-02 | 146.635   | -0.280 | 3.495E-01 | 6.555E-01 |

|                 |          |          |        |           |           |          |        |           |           |
|-----------------|----------|----------|--------|-----------|-----------|----------|--------|-----------|-----------|
| ENSG00000198585 | NUDT16   | 169.204  | -0.786 | 4.354E-03 | 4.806E-02 | 166.158  | -0.009 | 9.729E-01 | 9.894E-01 |
| ENSG00000186468 | RPS23    | 2531.538 | 0.456  | 4.353E-03 | 4.806E-02 | 2393.495 | 0.577  | 7.667E-04 | 1.901E-02 |
| ENSG00000121068 | TBX2     | 144.357  | -0.894 | 4.373E-03 | 4.809E-02 | 164.226  | -0.430 | 1.297E-01 | 4.063E-01 |
| ENSG00000144283 | PKP4     | 735.669  | -0.574 | 4.407E-03 | 4.832E-02 | 838.440  | -0.490 | 3.675E-02 | 2.063E-01 |
| ENSG00000160606 | TLCD1    | 95.081   | -0.941 | 4.412E-03 | 4.832E-02 | 79.782   | -0.327 | 3.001E-01 | 6.103E-01 |
| ENSG00000205213 | LGR4     | 224.005  | -0.741 | 4.431E-03 | 4.846E-02 | 242.480  | -0.480 | 4.696E-02 | 2.361E-01 |
| ENSG00000125843 | AP5S1    | 175.955  | -0.736 | 4.467E-03 | 4.863E-02 | 195.925  | -0.370 | 1.446E-01 | 4.299E-01 |
| ENSG00000221944 | TIGD1    | 53.014   | -1.053 | 4.496E-03 | 4.881E-02 | 49.015   | -0.349 | 3.475E-01 | 6.535E-01 |
| ENSG00000184117 | NIPSNAP1 | 460.872  | -0.624 | 4.497E-03 | 4.881E-02 | 509.808  | -0.406 | 1.216E-01 | 3.912E-01 |
| ENSG00000161203 | AP2M1    | 641.121  | -0.631 | 4.606E-03 | 4.970E-02 | 585.511  | -0.076 | 7.250E-01 | 8.861E-01 |
| ENSG00000081692 | JMJD4    | 102.015  | -0.951 | 4.655E-03 | 5.008E-02 | 120.250  | -0.438 | 1.593E-01 | 4.503E-01 |
| ENSG00000171161 | ZNF672   | 62.809   | -1.081 | 4.780E-03 | 5.127E-02 | 51.192   | -0.432 | 2.658E-01 | 5.754E-01 |
| ENSG00000125247 | TMTC4    | 137.384  | -0.870 | 4.794E-03 | 5.131E-02 | 165.630  | -0.250 | 3.234E-01 | 6.311E-01 |
| ENSG00000171227 | TMEM37   | 442.910  | -0.661 | 4.792E-03 | 5.131E-02 | 510.161  | -0.263 | 3.689E-01 | 6.726E-01 |
| ENSG00000204237 | OXLD1    | 153.423  | -0.885 | 4.919E-03 | 5.218E-02 | 184.455  | -0.240 | 3.356E-01 | 6.434E-01 |
| ENSG00000198890 | PRMT6    | 54.772   | -1.084 | 4.939E-03 | 5.225E-02 | 43.781   | -0.226 | 5.486E-01 | 7.916E-01 |
| ENSG00000115282 | TTC31    | 144.083  | -0.846 | 4.966E-03 | 5.234E-02 | 179.584  | -0.432 | 1.497E-01 | 4.372E-01 |
| ENSG00000163257 | DCAF16   | 334.586  | -0.653 | 4.966E-03 | 5.234E-02 | 406.771  | -0.294 | 1.876E-01 | 4.870E-01 |
| ENSG00000137038 | DMAC1    | 413.615  | -0.601 | 4.966E-03 | 5.234E-02 | 378.452  | -0.085 | 7.000E-01 | 8.731E-01 |
| ENSG00000099864 | PALM     | 205.969  | -0.802 | 5.090E-03 | 5.338E-02 | 269.261  | -0.349 | 2.690E-01 | 5.785E-01 |
| ENSG00000116771 | AGMAT    | 875.458  | -0.607 | 5.089E-03 | 5.338E-02 | 990.651  | -0.439 | 5.180E-02 | 2.484E-01 |
| ENSG00000079432 | CIC      | 104.805  | -0.872 | 5.156E-03 | 5.392E-02 | 85.877   | -0.275 | 4.001E-01 | 6.977E-01 |
| ENSG00000118418 | HMGN3    | 481.107  | -0.659 | 5.229E-03 | 5.452E-02 | 542.679  | -0.289 | 1.777E-01 | 4.738E-01 |
| ENSG00000153904 | DDAH1    | 411.478  | -0.596 | 5.285E-03 | 5.495E-02 | 490.272  | -0.326 | 1.433E-01 | 4.285E-01 |
| ENSG00000157911 | PEX10    | 326.364  | -0.664 | 5.318E-03 | 5.514E-02 | 317.206  | -0.293 | 2.721E-01 | 5.822E-01 |
| ENSG00000095787 | WAC      | 1342.806 | 0.491  | 5.376E-03 | 5.545E-02 | 1431.072 | 0.531  | 2.105E-03 | 3.582E-02 |
| ENSG00000164087 | POC1A    | 323.997  | -0.639 | 5.491E-03 | 5.613E-02 | 343.700  | -0.314 | 2.005E-01 | 5.028E-01 |

|                 |            |          |        |           |           |          |        |           |           |
|-----------------|------------|----------|--------|-----------|-----------|----------|--------|-----------|-----------|
| ENSG00000162521 | RBBP4      | 443.968  | -0.559 | 5.565E-03 | 5.661E-02 | 430.611  | -0.295 | 2.072E-01 | 5.100E-01 |
| ENSG00000231172 | AC007099.1 | 36.141   | -1.105 | 5.572E-03 | 5.663E-02 | 6.436    | -0.189 | 5.976E-01 | NA        |
| ENSG00000198780 | FAM169A    | 303.677  | -0.692 | 5.587E-03 | 5.673E-02 | 270.256  | -0.359 | 1.368E-01 | 4.180E-01 |
| ENSG00000184857 | TMEM186    | 191.392  | -0.846 | 5.793E-03 | 5.834E-02 | 167.236  | -0.298 | 3.232E-01 | 6.311E-01 |
| ENSG00000130702 | LAMA5      | 387.634  | -0.667 | 5.995E-03 | 5.965E-02 | 474.096  | -0.390 | 6.815E-02 | 2.858E-01 |
| ENSG00000063245 | EPN1       | 642.855  | -0.571 | 6.272E-03 | 6.150E-02 | 671.757  | -0.187 | 4.818E-01 | 7.517E-01 |
| ENSG00000104290 | FZD3       | 64.991   | -0.964 | 6.341E-03 | 6.185E-02 | 60.504   | -0.230 | 5.066E-01 | 7.649E-01 |
| ENSG00000188486 | H2AFX      | 457.254  | -0.815 | 6.358E-03 | 6.190E-02 | 313.109  | -0.057 | 8.146E-01 | 9.256E-01 |
| ENSG00000110011 | DNAJC4     | 54.269   | -1.019 | 6.452E-03 | 6.233E-02 | 60.108   | 0.131  | 7.260E-01 | 8.861E-01 |
| ENSG00000156990 | RPUSD3     | 308.819  | -0.590 | 6.445E-03 | 6.233E-02 | 306.351  | -0.253 | 2.893E-01 | 5.997E-01 |
| ENSG00000177963 | RIC8A      | 277.305  | -0.647 | 6.499E-03 | 6.260E-02 | 287.409  | -0.259 | 2.307E-01 | 5.364E-01 |
| ENSG00000186174 | BCL9L      | 263.044  | -0.696 | 6.533E-03 | 6.271E-02 | 254.592  | -0.435 | 1.472E-01 | 4.339E-01 |
| ENSG00000107890 | ANKRD26    | 217.824  | -0.810 | 6.590E-03 | 6.303E-02 | 306.569  | -0.300 | 2.286E-01 | 5.340E-01 |
| ENSG00000259494 | MRPL46     | 345.774  | -0.635 | 6.601E-03 | 6.303E-02 | 361.989  | -0.137 | 5.161E-01 | 7.717E-01 |
| ENSG00000071794 | HLTF       | 142.390  | -0.798 | 6.649E-03 | 6.343E-02 | 138.068  | -0.413 | 1.571E-01 | 4.473E-01 |
| ENSG00000168040 | FADD       | 146.943  | -0.755 | 6.747E-03 | 6.425E-02 | 155.344  | -0.372 | 1.548E-01 | 4.433E-01 |
| ENSG00000163993 | S100P      | 1491.894 | 0.480  | 6.803E-03 | 6.467E-02 | 1301.268 | 0.538  | 7.255E-03 | 7.927E-02 |
| ENSG00000027847 | B4GALT7    | 155.148  | -0.815 | 6.846E-03 | 6.482E-02 | 126.860  | -0.368 | 2.385E-01 | 5.456E-01 |
| ENSG00000123243 | ITIH5      | 146.765  | -0.746 | 6.854E-03 | 6.482E-02 | 171.326  | -0.069 | 7.936E-01 | 9.176E-01 |
| ENSG00000110200 | ANAPC15    | 121.861  | -0.949 | 6.975E-03 | 6.550E-02 | 131.402  | -0.335 | 2.847E-01 | 5.960E-01 |
| ENSG00000200090 | RF00019    | 36.333   | -1.164 | 7.023E-03 | 6.583E-02 | 44.455   | -0.186 | 6.294E-01 | 8.395E-01 |
| ENSG00000129292 | PHF20L1    | 308.086  | -0.693 | 7.177E-03 | 6.702E-02 | 327.583  | -0.384 | 6.643E-02 | 2.830E-01 |
| ENSG00000104870 | FCGRT      | 556.728  | -0.574 | 7.204E-03 | 6.713E-02 | 663.101  | -0.181 | 4.483E-01 | 7.275E-01 |
| ENSG00000182272 | B4GALNT4   | 90.226   | -0.933 | 7.215E-03 | 6.718E-02 | 87.683   | -0.162 | 5.997E-01 | 8.219E-01 |
| ENSG00000102081 | FMR1       | 234.086  | -0.705 | 7.494E-03 | 6.935E-02 | 366.241  | -0.449 | 4.162E-02 | 2.206E-01 |
| ENSG00000148341 | SH3GLB2    | 369.022  | -0.596 | 7.533E-03 | 6.962E-02 | 402.329  | -0.485 | 5.470E-02 | 2.560E-01 |
| ENSG00000107779 | BMPRI1A    | 43.648   | -1.021 | 7.552E-03 | 6.965E-02 | 40.236   | 0.240  | 5.393E-01 | 7.874E-01 |

|                 |             |         |        |           |           |         |        |           |           |
|-----------------|-------------|---------|--------|-----------|-----------|---------|--------|-----------|-----------|
| ENSG00000142039 | CCDC97      | 60.399  | -0.969 | 7.581E-03 | 6.987E-02 | 54.330  | -0.470 | 2.019E-01 | 5.042E-01 |
| ENSG00000258289 | CHURC1      | 90.764  | -0.953 | 7.628E-03 | 7.023E-02 | 142.073 | -0.367 | 1.765E-01 | 4.724E-01 |
| ENSG00000023516 | AKAP11      | 112.566 | -0.906 | 7.783E-03 | 7.130E-02 | 116.496 | -0.386 | 1.973E-01 | 4.986E-01 |
| ENSG00000143921 | ABCG8       | 32.247  | -1.101 | 7.868E-03 | 7.190E-02 | 37.328  | -0.492 | 2.147E-01 | 5.190E-01 |
| ENSG00000167461 | RAB8A       | 396.142 | -0.584 | 7.885E-03 | 7.199E-02 | 413.034 | -0.283 | 1.925E-01 | 4.932E-01 |
| ENSG00000132031 | MATN3       | 110.940 | -0.924 | 8.015E-03 | 7.269E-02 | 54.340  | 0.291  | 4.392E-01 | 7.216E-01 |
| ENSG00000166189 | HPS6        | 54.758  | -1.032 | 8.169E-03 | 7.335E-02 | 54.465  | -0.062 | 8.747E-01 | 9.523E-01 |
| ENSG00000143476 | DTL         | 212.620 | -0.746 | 8.147E-03 | 7.335E-02 | 227.510 | -0.132 | 6.093E-01 | 8.279E-01 |
| ENSG00000169714 | CNBP        | 637.179 | 0.488  | 8.155E-03 | 7.335E-02 | 568.125 | 0.643  | 1.078E-03 | 2.372E-02 |
| ENSG00000176542 | USF3        | 178.535 | -0.793 | 8.351E-03 | 7.459E-02 | 253.723 | -0.160 | 4.921E-01 | 7.559E-01 |
| ENSG00000148356 | LRSAM1      | 88.525  | -0.879 | 8.372E-03 | 7.462E-02 | 107.297 | -0.156 | 6.517E-01 | 8.498E-01 |
| ENSG00000157933 | SKI         | 351.496 | -0.557 | 8.420E-03 | 7.487E-02 | 378.367 | -0.350 | 8.589E-02 | 3.243E-01 |
| ENSG00000066248 | NGEF        | 124.083 | -0.798 | 8.506E-03 | 7.529E-02 | 104.801 | -0.073 | 8.113E-01 | 9.241E-01 |
| ENSG00000103479 | RBL2        | 126.782 | -0.802 | 8.599E-03 | 7.580E-02 | 160.278 | -0.344 | 2.147E-01 | 5.190E-01 |
| ENSG00000137936 | BCAR3       | 29.762  | 1.120  | 8.808E-03 | 7.680E-02 | 53.676  | 1.158  | 1.468E-03 | 2.810E-02 |
| ENSG00000224870 | AL391244.1  | 151.758 | -0.836 | 8.932E-03 | 7.740E-02 | 181.659 | -0.361 | 1.867E-01 | 4.857E-01 |
| ENSG00000014138 | POLA2       | 67.801  | -0.965 | 8.942E-03 | 7.742E-02 | 67.412  | -0.433 | 2.217E-01 | 5.271E-01 |
| ENSG00000100865 | CINP        | 97.254  | -0.877 | 9.070E-03 | 7.815E-02 | 104.268 | -0.027 | 9.344E-01 | 9.761E-01 |
| ENSG00000226419 | SLC16A1-AS1 | 111.065 | -0.898 | 9.098E-03 | 7.833E-02 | 129.307 | -0.124 | 6.599E-01 | 8.532E-01 |
| ENSG00000166197 | NOLC1       | 956.768 | 0.470  | 9.173E-03 | 7.872E-02 | 817.115 | 0.571  | 1.337E-02 | 1.160E-01 |
| ENSG00000010626 | LRRC23      | 36.643  | -1.078 | 9.227E-03 | 7.900E-02 | 38.590  | -0.441 | 2.819E-01 | 5.925E-01 |
| ENSG00000175137 | SH3BP5L     | 221.972 | -0.763 | 9.296E-03 | 7.953E-02 | 258.316 | -0.087 | 7.762E-01 | 9.088E-01 |
| ENSG00000164967 | RPP25L      | 113.626 | -0.821 | 9.512E-03 | 8.080E-02 | 98.359  | -0.185 | 5.651E-01 | 8.014E-01 |
| ENSG00000132773 | TOE1        | 146.008 | -0.739 | 9.527E-03 | 8.080E-02 | 111.664 | 0.018  | 9.577E-01 | 9.840E-01 |
| ENSG00000115274 | INO80B      | 149.037 | -0.915 | 9.569E-03 | 8.082E-02 | 102.111 | -0.393 | 2.985E-01 | 6.088E-01 |
| ENSG00000106384 | MOGAT3      | 141.953 | -0.721 | 9.575E-03 | 8.082E-02 | 153.312 | -0.139 | 6.324E-01 | 8.407E-01 |
| ENSG00000277972 | CISD3       | 385.957 | -0.557 | 9.873E-03 | 8.252E-02 | 355.429 | -0.192 | 3.876E-01 | 6.866E-01 |

|                 |           |           |        |           |           |           |        |           |           |
|-----------------|-----------|-----------|--------|-----------|-----------|-----------|--------|-----------|-----------|
| ENSG00000111596 | CNOT2     | 377.169   | -0.521 | 1.008E-02 | 8.345E-02 | 396.880   | -0.269 | 1.977E-01 | 4.990E-01 |
| ENSG00000108639 | SYNGR2    | 562.772   | -0.563 | 1.022E-02 | 8.430E-02 | 996.485   | 0.071  | 7.780E-01 | 9.100E-01 |
| ENSG00000124766 | SOX4      | 534.361   | -0.506 | 1.031E-02 | 8.493E-02 | 566.678   | -0.080 | 7.008E-01 | 8.733E-01 |
| ENSG00000177946 | CENPBD1   | 136.536   | -0.954 | 1.033E-02 | 8.506E-02 | 148.119   | -0.357 | 2.678E-01 | 5.776E-01 |
| ENSG00000171792 | RHNO1     | 180.172   | -0.846 | 1.039E-02 | 8.542E-02 | 195.748   | -0.448 | 9.374E-02 | 3.398E-01 |
| ENSG00000101911 | PRPS2     | 93.202    | -0.915 | 1.049E-02 | 8.582E-02 | 74.599    | -0.414 | 2.294E-01 | 5.348E-01 |
| ENSG00000175782 | SLC35E3   | 335.364   | -0.599 | 1.046E-02 | 8.582E-02 | 352.471   | -0.319 | 1.541E-01 | 4.423E-01 |
| ENSG00000167513 | CDT1      | 228.230   | -0.672 | 1.061E-02 | 8.639E-02 | 192.145   | -0.259 | 4.112E-01 | 7.051E-01 |
| ENSG00000100504 | PYGL      | 192.362   | -0.682 | 1.081E-02 | 8.729E-02 | 283.017   | -0.367 | 1.386E-01 | 4.202E-01 |
| ENSG00000179933 | C14orf119 | 466.001   | -0.526 | 1.085E-02 | 8.739E-02 | 470.417   | -0.263 | 1.884E-01 | 4.873E-01 |
| ENSG00000095002 | MSH2      | 205.352   | -0.745 | 1.091E-02 | 8.781E-02 | 258.511   | -0.106 | 6.448E-01 | 8.462E-01 |
| ENSG00000100410 | PHF5A     | 385.049   | -0.525 | 1.096E-02 | 8.801E-02 | 312.266   | -0.404 | 8.384E-02 | 3.200E-01 |
| ENSG00000121579 | NAA50     | 823.509   | 0.455  | 1.096E-02 | 8.801E-02 | 779.877   | 0.507  | 1.481E-02 | 1.233E-01 |
| ENSG00000169955 | ZNF747    | 51.382    | -0.944 | 1.116E-02 | 8.954E-02 | 58.564    | -0.430 | 2.566E-01 | 5.668E-01 |
| ENSG00000108840 | HDAC5     | 77.295    | -0.912 | 1.139E-02 | 9.065E-02 | 86.012    | -0.182 | 5.842E-01 | 8.131E-01 |
| ENSG00000116353 | MECR      | 146.854   | -0.768 | 1.151E-02 | 9.133E-02 | 182.607   | 0.370  | 2.538E-01 | 5.638E-01 |
| ENSG00000156968 | MPV17L    | 304.627   | -0.638 | 1.153E-02 | 9.136E-02 | 288.845   | -0.448 | 6.298E-02 | 2.751E-01 |
| ENSG00000068366 | ACSL4     | 917.247   | -0.654 | 1.157E-02 | 9.153E-02 | 944.067   | -0.316 | 1.474E-01 | 4.340E-01 |
| ENSG00000105707 | HPN       | 166.552   | -0.709 | 1.162E-02 | 9.169E-02 | 206.855   | -0.375 | 1.721E-01 | 4.676E-01 |
| ENSG00000115365 | LANCL1    | 279.871   | -0.687 | 1.164E-02 | 9.176E-02 | 296.063   | -0.362 | 1.205E-01 | 3.906E-01 |
| ENSG00000112306 | RPS12     | 27721.405 | 0.489  | 1.167E-02 | 9.195E-02 | 24997.618 | 0.611  | 2.985E-04 | 9.653E-03 |
| ENSG00000166340 | TPP1      | 311.589   | -0.603 | 1.174E-02 | 9.233E-02 | 381.172   | -0.167 | 4.715E-01 | 7.467E-01 |
| ENSG00000140259 | MFAP1     | 376.030   | -0.601 | 1.177E-02 | 9.247E-02 | 390.809   | -0.274 | 2.759E-01 | 5.864E-01 |
| ENSG00000198055 | GRK6      | 158.560   | -0.737 | 1.199E-02 | 9.378E-02 | 129.543   | -0.125 | 6.834E-01 | 8.644E-01 |
| ENSG00000176909 | MAMSTR    | 34.872    | -1.041 | 1.201E-02 | 9.379E-02 | 51.527    | -0.369 | 3.340E-01 | 6.414E-01 |
| ENSG00000136231 | IGF2BP3   | 409.168   | -0.552 | 1.211E-02 | 9.415E-02 | 434.610   | -0.391 | 5.023E-02 | 2.435E-01 |
| ENSG00000119421 | NDUFA8    | 455.071   | -0.540 | 1.218E-02 | 9.427E-02 | 547.698   | -0.263 | 1.733E-01 | 4.693E-01 |



|                 |         |          |        |           |           |          |        |           |           |
|-----------------|---------|----------|--------|-----------|-----------|----------|--------|-----------|-----------|
| ENSG00000121060 | TRIM25  | 372.474  | -0.669 | 1.238E-02 | 9.524E-02 | 426.720  | -0.448 | 4.481E-02 | 2.297E-01 |
| ENSG00000197948 | FCHSD1  | 45.427   | -1.022 | 1.248E-02 | 9.591E-02 | 56.477   | -0.161 | 6.451E-01 | 8.463E-01 |
| ENSG00000167680 | SEMA6B  | 141.168  | -0.839 | 1.263E-02 | 9.646E-02 | 113.035  | -0.146 | 6.611E-01 | 8.536E-01 |
| ENSG00000175283 | DOLK    | 68.526   | -0.911 | 1.264E-02 | 9.650E-02 | 49.878   | -0.328 | 3.912E-01 | 6.894E-01 |
| ENSG00000011454 | RABGAP1 | 288.769  | -0.603 | 1.265E-02 | 9.650E-02 | 484.806  | -0.361 | 8.836E-02 | 3.299E-01 |
| ENSG00000086504 | MRPL28  | 32.082   | -1.051 | 1.289E-02 | 9.773E-02 | 28.010   | -0.559 | 1.666E-01 | 4.597E-01 |
| ENSG00000146433 | TMEM181 | 308.637  | -0.583 | 1.296E-02 | 9.809E-02 | 258.455  | -0.456 | 6.676E-02 | 2.835E-01 |
| ENSG00000148396 | SEC16A  | 264.953  | -0.578 | 1.298E-02 | 9.809E-02 | 281.182  | -0.409 | 1.477E-01 | 4.344E-01 |
| ENSG00000155438 | NIFK    | 630.133  | 0.445  | 1.303E-02 | 9.839E-02 | 594.046  | 0.591  | 4.948E-03 | 6.328E-02 |
| ENSG00000123080 | CDKN2C  | 110.980  | -0.813 | 1.335E-02 | 1.001E-01 | 66.910   | -0.264 | 4.367E-01 | 7.205E-01 |
| ENSG00000205808 | PLPP6   | 53.546   | -0.968 | 1.341E-02 | 1.004E-01 | 52.386   | -0.212 | 5.483E-01 | 7.916E-01 |
| ENSG00000062650 | WAPL    | 393.802  | -0.578 | 1.348E-02 | 1.009E-01 | 521.036  | 0.085  | 6.543E-01 | 8.507E-01 |
| ENSG00000183856 | IQGAP3  | 81.377   | -0.863 | 1.375E-02 | 1.022E-01 | 59.857   | -0.163 | 6.564E-01 | 8.519E-01 |
| ENSG00000132383 | RPA1    | 530.253  | -0.578 | 1.375E-02 | 1.022E-01 | 490.222  | -0.403 | 6.300E-02 | 2.751E-01 |
| ENSG00000104427 | ZC2HC1A | 97.953   | -0.884 | 1.380E-02 | 1.025E-01 | 104.059  | -0.261 | 3.872E-01 | 6.865E-01 |
| ENSG00000120054 | CPN1    | 71.236   | -0.878 | 1.396E-02 | 1.033E-01 | 79.749   | -0.043 | 8.999E-01 | 9.629E-01 |
| ENSG00000001629 | ANKIB1  | 171.887  | -0.677 | 1.398E-02 | 1.033E-01 | 166.148  | -0.427 | 1.480E-01 | 4.350E-01 |
| ENSG00000168569 | TMEM223 | 280.750  | -0.621 | 1.400E-02 | 1.033E-01 | 289.249  | -0.123 | 6.168E-01 | 8.320E-01 |
| ENSG00000167283 | ATP5MG  | 6061.705 | 0.456  | 1.407E-02 | 1.036E-01 | 5580.421 | 0.547  | 1.033E-03 | 2.317E-02 |
| ENSG00000140365 | COMMD4  | 225.639  | -0.669 | 1.409E-02 | 1.036E-01 | 236.064  | -0.442 | 1.449E-01 | 4.299E-01 |
| ENSG00000145703 | IQGAP2  | 566.894  | -0.536 | 1.427E-02 | 1.044E-01 | 743.693  | -0.390 | 5.195E-02 | 2.487E-01 |
| ENSG00000100023 | PPIL2   | 108.310  | -0.740 | 1.466E-02 | 1.069E-01 | 150.779  | -0.424 | 1.527E-01 | 4.405E-01 |
| ENSG00000087274 | ADD1    | 509.774  | -0.524 | 1.469E-02 | 1.070E-01 | 534.723  | -0.255 | 2.160E-01 | 5.213E-01 |
| ENSG00000174173 | TRMT10C | 153.624  | -0.748 | 1.477E-02 | 1.074E-01 | 135.419  | -0.428 | 1.623E-01 | 4.528E-01 |
| ENSG00000198743 | SLC5A3  | 70.888   | -0.973 | 1.495E-02 | 1.084E-01 | 96.094   | -0.353 | 2.680E-01 | 5.777E-01 |
| ENSG00000114988 | LMAN2L  | 169.219  | -0.734 | 1.497E-02 | 1.085E-01 | 169.706  | -0.299 | 3.302E-01 | 6.378E-01 |
| ENSG00000069702 | TGFBR3  | 205.300  | -0.726 | 1.498E-02 | 1.085E-01 | 238.091  | -0.367 | 2.295E-01 | 5.350E-01 |

|                 |            |          |        |           |           |          |        |           |           |
|-----------------|------------|----------|--------|-----------|-----------|----------|--------|-----------|-----------|
| ENSG00000077514 | POLD3      | 150.429  | -0.831 | 1.505E-02 | 1.087E-01 | 144.435  | -0.134 | 6.596E-01 | 8.532E-01 |
| ENSG00000079785 | DDX1       | 1400.209 | -0.531 | 1.505E-02 | 1.087E-01 | 1833.442 | -0.219 | 2.232E-01 | 5.282E-01 |
| ENSG00000142252 | GEMIN7     | 75.223   | -0.828 | 1.507E-02 | 1.087E-01 | 43.830   | 0.048  | 8.988E-01 | 9.628E-01 |
| ENSG00000236287 | ZBED5      | 53.448   | -1.011 | 1.515E-02 | 1.092E-01 | 64.041   | -0.466 | 2.551E-01 | 5.656E-01 |
| ENSG00000225439 | BOLA3-AS1  | 86.763   | -0.834 | 1.516E-02 | 1.092E-01 | 105.182  | -0.293 | 3.265E-01 | 6.345E-01 |
| ENSG00000211445 | GPX3       | 150.323  | -0.731 | 1.518E-02 | 1.092E-01 | 167.055  | -0.405 | 1.934E-01 | 4.942E-01 |
| ENSG00000188242 | AC010442.1 | 48.306   | -1.010 | 1.538E-02 | 1.104E-01 | 57.222   | -0.396 | 2.819E-01 | 5.925E-01 |
| ENSG00000074842 | MYDGF      | 1502.130 | 0.480  | 1.542E-02 | 1.106E-01 | 1101.915 | 0.503  | 6.605E-03 | 7.511E-02 |
| ENSG00000210112 | MT-TM      | 107.470  | -0.879 | 1.553E-02 | 1.111E-01 | 80.472   | -0.470 | 2.260E-01 | 5.309E-01 |
| ENSG00000169764 | UGP2       | 656.506  | 0.468  | 1.561E-02 | 1.115E-01 | 671.972  | 0.553  | 7.149E-03 | 7.876E-02 |
| ENSG00000146416 | AIG1       | 389.774  | -0.530 | 1.563E-02 | 1.115E-01 | 405.376  | -0.448 | 3.934E-02 | 2.147E-01 |
| ENSG00000138160 | KIF11      | 202.999  | -0.640 | 1.568E-02 | 1.116E-01 | 189.123  | -0.106 | 6.877E-01 | 8.669E-01 |
| ENSG00000172830 | SSH3       | 125.465  | -0.814 | 1.574E-02 | 1.120E-01 | 136.759  | -0.142 | 6.208E-01 | 8.344E-01 |
| ENSG00000125826 | RBCK1      | 2183.192 | 0.449  | 1.593E-02 | 1.129E-01 | 2056.165 | 0.592  | 2.055E-03 | 3.538E-02 |
| ENSG00000169047 | IRS1       | 146.630  | -0.667 | 1.629E-02 | 1.147E-01 | 159.382  | -0.374 | 1.554E-01 | 4.445E-01 |
| ENSG00000102996 | MMP15      | 79.091   | -0.867 | 1.673E-02 | 1.170E-01 | 74.242   | -0.426 | 2.134E-01 | 5.170E-01 |
| ENSG00000117906 | RCN2       | 317.541  | -0.664 | 1.728E-02 | 1.196E-01 | 209.941  | -0.421 | 1.535E-01 | 4.419E-01 |
| ENSG00000118137 | APOA1      | 5355.652 | -0.531 | 1.733E-02 | 1.199E-01 | 5163.023 | -0.296 | 2.349E-01 | 5.411E-01 |
| ENSG00000169592 | INO80E     | 327.548  | -0.570 | 1.753E-02 | 1.209E-01 | 318.312  | -0.142 | 6.275E-01 | 8.392E-01 |
| ENSG00000197852 | FAM212B    | 122.208  | -0.793 | 1.761E-02 | 1.210E-01 | 122.495  | -0.153 | 5.937E-01 | 8.183E-01 |
| ENSG00000178772 | CPN2       | 299.269  | -0.614 | 1.760E-02 | 1.210E-01 | 284.059  | -0.079 | 7.296E-01 | 8.882E-01 |
| ENSG00000141756 | FKBP10     | 298.341  | -0.711 | 1.772E-02 | 1.211E-01 | 277.022  | -0.423 | 1.751E-01 | 4.707E-01 |
| ENSG00000204356 | NELFE      | 409.614  | -0.526 | 1.771E-02 | 1.211E-01 | 384.694  | -0.442 | 8.234E-02 | 3.173E-01 |
| ENSG00000118873 | RAB3GAP2   | 189.451  | -0.759 | 1.798E-02 | 1.224E-01 | 251.692  | 0.025  | 9.260E-01 | 9.731E-01 |
| ENSG00000138308 | PLA2G12B   | 41.734   | -0.932 | 1.802E-02 | 1.225E-01 | 77.900   | -0.475 | 1.590E-01 | 4.498E-01 |
| ENSG00000037757 | MRI1       | 111.882  | -0.768 | 1.802E-02 | 1.225E-01 | 104.816  | -0.056 | 8.667E-01 | 9.495E-01 |
| ENSG00000090861 | AARS       | 1006.180 | 0.490  | 1.811E-02 | 1.230E-01 | 1056.293 | 0.527  | 5.479E-03 | 6.747E-02 |

|                 |            |          |        |           |           |          |        |           |           |
|-----------------|------------|----------|--------|-----------|-----------|----------|--------|-----------|-----------|
| ENSG00000040633 | PHF23      | 164.304  | -0.641 | 1.838E-02 | 1.243E-01 | 182.039  | -0.255 | 3.366E-01 | 6.445E-01 |
| ENSG00000117054 | ACADM      | 310.812  | -0.534 | 1.844E-02 | 1.245E-01 | 348.211  | -0.416 | 6.121E-02 | 2.725E-01 |
| ENSG00000080618 | CPB2       | 171.028  | -0.725 | 1.859E-02 | 1.252E-01 | 154.484  | -0.166 | 5.368E-01 | 7.866E-01 |
| ENSG00000103174 | NAGPA      | 322.155  | -0.530 | 1.865E-02 | 1.254E-01 | 326.161  | -0.193 | 4.729E-01 | 7.468E-01 |
| ENSG00000126603 | GLIS2      | 29.198   | 0.997  | 1.865E-02 | 1.254E-01 | 47.053   | 0.569  | 1.388E-01 | 4.208E-01 |
| ENSG00000184207 | PGP        | 294.002  | -0.549 | 1.876E-02 | 1.260E-01 | 303.315  | 0.014  | 9.513E-01 | 9.821E-01 |
| ENSG00000146063 | TRIM41     | 110.222  | -0.710 | 1.901E-02 | 1.268E-01 | 104.215  | -0.485 | 1.007E-01 | 3.546E-01 |
| ENSG00000148773 | MKI67      | 1321.006 | -0.515 | 1.902E-02 | 1.268E-01 | 1324.531 | -0.463 | 1.708E-02 | 1.340E-01 |
| ENSG00000088992 | TESC       | 363.472  | -0.644 | 1.914E-02 | 1.273E-01 | 211.009  | 0.186  | 5.042E-01 | 7.642E-01 |
| ENSG00000115756 | HPCAL1     | 774.743  | 0.466  | 1.935E-02 | 1.281E-01 | 687.986  | 0.598  | 1.241E-03 | 2.550E-02 |
| ENSG00000109971 | HSPA8      | 904.679  | -0.508 | 1.942E-02 | 1.283E-01 | 993.037  | -0.470 | 5.492E-02 | 2.564E-01 |
| ENSG00000127564 | PKMYT1     | 282.549  | -0.549 | 1.946E-02 | 1.285E-01 | 251.805  | 0.081  | 7.698E-01 | 9.054E-01 |
| ENSG00000037897 | METTL1     | 213.782  | -0.659 | 1.952E-02 | 1.287E-01 | 211.973  | -0.199 | 4.874E-01 | 7.532E-01 |
| ENSG00000197858 | GPAA1      | 416.900  | -0.513 | 1.955E-02 | 1.288E-01 | 404.245  | -0.269 | 1.962E-01 | 4.976E-01 |
| ENSG00000169957 | ZNF768     | 168.355  | -0.709 | 1.999E-02 | 1.309E-01 | 125.312  | -0.417 | 1.987E-01 | 4.997E-01 |
| ENSG00000127220 | ABHD8      | 48.097   | -0.915 | 2.003E-02 | 1.311E-01 | 42.246   | -0.298 | 4.476E-01 | 7.271E-01 |
| ENSG00000106351 | AGFG2      | 212.935  | -0.569 | 2.019E-02 | 1.319E-01 | 187.829  | -0.179 | 5.148E-01 | 7.709E-01 |
| ENSG00000182841 | RRP7BP     | 56.076   | -0.879 | 2.027E-02 | 1.320E-01 | 67.099   | -0.312 | 3.832E-01 | 6.828E-01 |
| ENSG00000272994 | AC012360.3 | 52.627   | -0.888 | 2.058E-02 | 1.336E-01 | 86.172   | -0.285 | 4.004E-01 | 6.978E-01 |
| ENSG00000152147 | GEMIN6     | 132.842  | -0.709 | 2.067E-02 | 1.341E-01 | 129.385  | -0.203 | 5.255E-01 | 7.794E-01 |
| ENSG00000250321 | AC079140.2 | 27.845   | -1.012 | 2.093E-02 | 1.352E-01 | 31.601   | 1.002  | 1.607E-02 | 1.298E-01 |
| ENSG00000213463 | SYNJ2BP    | 137.649  | -0.779 | 2.097E-02 | 1.354E-01 | 186.556  | -0.409 | 1.273E-01 | 4.028E-01 |
| ENSG00000198105 | ZNF248     | 57.955   | -0.927 | 2.114E-02 | 1.362E-01 | 61.233   | -0.450 | 1.979E-01 | 4.992E-01 |
| ENSG00000140832 | MARVELD3   | 106.975  | -0.776 | 2.138E-02 | 1.372E-01 | 109.868  | -0.020 | 9.509E-01 | 9.819E-01 |
| ENSG00000054654 | SYNE2      | 194.841  | -0.648 | 2.147E-02 | 1.376E-01 | 283.752  | -0.424 | 6.535E-02 | 2.799E-01 |
| ENSG00000164403 | SHROOM1    | 200.357  | -0.648 | 2.157E-02 | 1.379E-01 | 185.291  | -0.150 | 6.107E-01 | 8.288E-01 |
| ENSG00000085998 | POMGNT1    | 73.342   | -0.799 | 2.175E-02 | 1.387E-01 | 76.840   | -0.271 | 4.098E-01 | 7.035E-01 |

|                 |            |         |        |           |           |         |        |           |           |
|-----------------|------------|---------|--------|-----------|-----------|---------|--------|-----------|-----------|
| ENSG00000136720 | HS6ST1     | 108.889 | -0.824 | 2.179E-02 | 1.388E-01 | 79.129  | -0.383 | 2.499E-01 | 5.593E-01 |
| ENSG00000189339 | SLC35E2B   | 161.450 | -0.780 | 2.185E-02 | 1.388E-01 | 289.529 | -0.498 | 4.129E-02 | 2.199E-01 |
| ENSG00000164096 | C4orf3     | 388.696 | -0.588 | 2.205E-02 | 1.394E-01 | 400.691 | -0.349 | 1.047E-01 | 3.618E-01 |
| ENSG00000212978 | AC016747.1 | 128.336 | -0.646 | 2.219E-02 | 1.402E-01 | 156.194 | -0.457 | 1.741E-01 | 4.696E-01 |
| ENSG00000179523 | EIF3J-AS1  | 56.354  | -0.930 | 2.229E-02 | 1.407E-01 | 94.076  | -0.493 | 9.900E-02 | 3.508E-01 |
| ENSG00000181396 | OGFOD3     | 295.746 | -0.566 | 2.248E-02 | 1.415E-01 | 333.659 | -0.318 | 1.829E-01 | 4.819E-01 |
| ENSG00000147804 | SLC39A4    | 424.424 | -0.522 | 2.250E-02 | 1.416E-01 | 471.444 | -0.166 | 5.428E-01 | 7.887E-01 |
| ENSG00000143363 | PRUNE1     | 156.589 | -0.681 | 2.305E-02 | 1.441E-01 | 186.207 | -0.290 | 2.904E-01 | 6.007E-01 |
| ENSG00000139679 | LPAR6      | 37.563  | -0.950 | 2.322E-02 | 1.448E-01 | 39.873  | -0.300 | 4.289E-01 | 7.160E-01 |
| ENSG00000196743 | GM2A       | 277.377 | -0.509 | 2.321E-02 | 1.448E-01 | 279.467 | -0.326 | 1.522E-01 | 4.398E-01 |
| ENSG00000117834 | SLC5A9     | 61.663  | -0.817 | 2.326E-02 | 1.450E-01 | 92.880  | -0.287 | 4.227E-01 | 7.122E-01 |
| ENSG00000198863 | RUNDC1     | 91.206  | -0.833 | 2.330E-02 | 1.450E-01 | 140.993 | -0.324 | 2.853E-01 | 5.965E-01 |
| ENSG00000204220 | PFDN6      | 108.376 | -0.756 | 2.329E-02 | 1.450E-01 | 110.361 | 0.032  | 9.293E-01 | 9.744E-01 |
| ENSG00000197165 | SULT1A2    | 174.335 | -0.656 | 2.387E-02 | 1.477E-01 | 200.105 | -0.293 | 3.607E-01 | 6.659E-01 |
| ENSG00000158528 | PPP1R9A    | 302.665 | -0.545 | 2.392E-02 | 1.477E-01 | 431.972 | -0.261 | 2.168E-01 | 5.218E-01 |
| ENSG00000103111 | MON1B      | 306.166 | -0.502 | 2.393E-02 | 1.477E-01 | 240.707 | -0.493 | 7.805E-02 | 3.073E-01 |
| ENSG00000132254 | ARFIP2     | 132.955 | -0.716 | 2.431E-02 | 1.494E-01 | 127.561 | -0.187 | 5.420E-01 | 7.887E-01 |
| ENSG00000034533 | ASTE1      | 44.435  | -0.894 | 2.443E-02 | 1.499E-01 | 28.443  | -0.260 | 5.312E-01 | 7.836E-01 |
| ENSG00000160214 | RRP1       | 162.560 | -0.669 | 2.468E-02 | 1.505E-01 | 148.117 | -0.186 | 5.581E-01 | 7.974E-01 |
| ENSG00000185298 | CCDC137    | 342.116 | -0.541 | 2.465E-02 | 1.505E-01 | 301.821 | -0.357 | 1.866E-01 | 4.857E-01 |
| ENSG00000102786 | INTS6      | 165.934 | -0.657 | 2.489E-02 | 1.513E-01 | 191.135 | -0.221 | 4.217E-01 | 7.118E-01 |
| ENSG00000249115 | HAUS5      | 60.716  | -0.804 | 2.492E-02 | 1.514E-01 | 72.830  | -0.422 | 2.060E-01 | 5.086E-01 |
| ENSG00000248092 | NNT-AS1    | 186.502 | -0.589 | 2.527E-02 | 1.530E-01 | 195.855 | -0.167 | 5.365E-01 | 7.866E-01 |
| ENSG00000176623 | RMDN1      | 229.849 | -0.599 | 2.534E-02 | 1.531E-01 | 242.350 | -0.401 | 1.435E-01 | 4.289E-01 |
| ENSG00000175567 | UCP2       | 158.963 | -0.581 | 2.574E-02 | 1.550E-01 | 140.715 | -0.214 | 5.164E-01 | 7.719E-01 |
| ENSG00000164850 | GPER1      | 226.859 | -0.627 | 2.577E-02 | 1.551E-01 | 231.944 | -0.310 | 2.100E-01 | 5.130E-01 |
| ENSG00000137944 | KYAT3      | 95.800  | -0.787 | 2.584E-02 | 1.554E-01 | 116.126 | -0.131 | 6.549E-01 | 8.510E-01 |

|                 |           |          |        |           |           |          |        |           |           |
|-----------------|-----------|----------|--------|-----------|-----------|----------|--------|-----------|-----------|
| ENSG00000130347 | RTN4IP1   | 61.219   | -0.884 | 2.589E-02 | 1.556E-01 | 49.621   | -0.204 | 5.974E-01 | 8.202E-01 |
| ENSG00000112167 | SAYSD1    | 108.118  | -0.688 | 2.610E-02 | 1.564E-01 | 127.327  | -0.094 | 7.343E-01 | 8.898E-01 |
| ENSG00000106665 | CLIP2     | 44.005   | -0.895 | 2.616E-02 | 1.566E-01 | 38.750   | -0.373 | 3.355E-01 | 6.433E-01 |
| ENSG00000103066 | PLA2G15   | 110.953  | -0.664 | 2.618E-02 | 1.566E-01 | 92.698   | 0.100  | 7.854E-01 | 9.132E-01 |
| ENSG00000064545 | TMEM161A  | 384.607  | -0.555 | 2.655E-02 | 1.581E-01 | 350.101  | 0.059  | 8.333E-01 | 9.345E-01 |
| ENSG00000130312 | MRPL34    | 770.411  | 0.472  | 2.665E-02 | 1.584E-01 | 619.742  | 0.518  | 2.809E-02 | 1.769E-01 |
| ENSG00000114125 | RNF7      | 378.653  | 0.457  | 2.680E-02 | 1.589E-01 | 315.866  | 0.551  | 1.985E-02 | 1.480E-01 |
| ENSG00000149179 | C11orf49  | 58.495   | -0.854 | 2.699E-02 | 1.595E-01 | 53.009   | -0.028 | 9.391E-01 | 9.777E-01 |
| ENSG00000198919 | DZIP3     | 106.130  | -0.692 | 2.708E-02 | 1.595E-01 | 183.765  | -0.193 | 4.819E-01 | 7.517E-01 |
| ENSG00000187017 | ESPN      | 216.681  | -0.577 | 2.709E-02 | 1.595E-01 | 163.434  | -0.491 | 8.781E-02 | 3.285E-01 |
| ENSG00000133226 | SRRM1     | 3043.154 | 0.396  | 2.707E-02 | 1.595E-01 | 3046.631 | 0.531  | 3.656E-03 | 5.202E-02 |
| ENSG00000171135 | JAGN1     | 316.512  | -0.579 | 2.745E-02 | 1.606E-01 | 333.383  | -0.450 | 5.636E-02 | 2.600E-01 |
| ENSG00000164171 | ITGA2     | 127.500  | -0.760 | 2.754E-02 | 1.609E-01 | 155.199  | -0.369 | 1.832E-01 | 4.824E-01 |
| ENSG00000046647 | GEMIN8    | 47.821   | -0.847 | 2.766E-02 | 1.613E-01 | 45.822   | -0.233 | 5.488E-01 | 7.916E-01 |
| ENSG00000055163 | CYFIP2    | 277.033  | -0.549 | 2.783E-02 | 1.617E-01 | 314.235  | -0.196 | 4.374E-01 | 7.205E-01 |
| ENSG00000134905 | CARS2     | 228.193  | -0.566 | 2.818E-02 | 1.627E-01 | 195.182  | -0.236 | 3.627E-01 | 6.674E-01 |
| ENSG00000213462 | ERV3-1    | 108.485  | -0.752 | 2.823E-02 | 1.629E-01 | 148.855  | -0.302 | 2.788E-01 | 5.894E-01 |
| ENSG00000147099 | HDAC8     | 99.212   | -0.764 | 2.866E-02 | 1.646E-01 | 92.337   | -0.326 | 3.205E-01 | 6.294E-01 |
| ENSG00000175832 | ETV4      | 424.060  | -0.519 | 2.872E-02 | 1.648E-01 | 291.207  | 0.139  | 6.017E-01 | 8.236E-01 |
| ENSG00000199753 | SNORD104  | 41.144   | -0.848 | 2.884E-02 | 1.652E-01 | 37.467   | -0.269 | 4.860E-01 | 7.530E-01 |
| ENSG00000137274 | BPHL      | 84.001   | -0.848 | 2.910E-02 | 1.661E-01 | 84.778   | -0.379 | 2.867E-01 | 5.977E-01 |
| ENSG00000137040 | RANBP6    | 77.519   | -0.718 | 2.924E-02 | 1.666E-01 | 92.672   | -0.007 | 9.833E-01 | 9.929E-01 |
| ENSG00000131323 | TRAF3     | 104.237  | -0.686 | 2.946E-02 | 1.671E-01 | 112.890  | 0.046  | 8.763E-01 | 9.525E-01 |
| ENSG00000113161 | HMGCR     | 519.452  | -0.538 | 2.964E-02 | 1.680E-01 | 480.221  | -0.459 | 2.322E-02 | 1.607E-01 |
| ENSG00000168734 | PKIG      | 169.354  | -0.595 | 2.969E-02 | 1.682E-01 | 226.800  | -0.479 | 7.196E-02 | 2.939E-01 |
| ENSG00000141655 | TNFRSF11A | 49.071   | -0.808 | 2.972E-02 | 1.683E-01 | 38.010   | -0.417 | 2.986E-01 | 6.088E-01 |
| ENSG00000145912 | NHP2      | 205.004  | -0.528 | 3.003E-02 | 1.694E-01 | 199.188  | -0.026 | 9.227E-01 | 9.716E-01 |

|                 |          |          |        |           |           |          |        |           |           |
|-----------------|----------|----------|--------|-----------|-----------|----------|--------|-----------|-----------|
| ENSG00000130713 | EXOSC2   | 140.703  | -0.730 | 3.039E-02 | 1.705E-01 | 130.682  | -0.293 | 3.333E-01 | 6.408E-01 |
| ENSG00000165868 | HSPA12A  | 32.118   | -0.915 | 3.043E-02 | 1.706E-01 | 32.548   | -0.258 | 5.183E-01 | 7.737E-01 |
| ENSG00000006118 | TMEM132A | 38.681   | -0.866 | 3.042E-02 | 1.706E-01 | 46.367   | -0.416 | 2.709E-01 | 5.807E-01 |
| ENSG00000178105 | DDX10    | 495.063  | 0.497  | 3.045E-02 | 1.706E-01 | 510.425  | 0.694  | 1.306E-03 | 2.611E-02 |
| ENSG00000096080 | MRPS18A  | 252.883  | -0.615 | 3.056E-02 | 1.710E-01 | 230.826  | -0.395 | 1.556E-01 | 4.447E-01 |
| ENSG00000033011 | ALG1     | 302.680  | -0.567 | 3.066E-02 | 1.712E-01 | 280.413  | -0.332 | 1.478E-01 | 4.348E-01 |
| ENSG00000060762 | MPC1     | 381.499  | -0.512 | 3.080E-02 | 1.718E-01 | 331.937  | -0.256 | 2.665E-01 | 5.760E-01 |
| ENSG00000153767 | GTF2E1   | 58.019   | -0.773 | 3.097E-02 | 1.721E-01 | 61.215   | 0.124  | 7.299E-01 | 8.882E-01 |
| ENSG00000107789 | MINPP1   | 184.666  | -0.618 | 3.099E-02 | 1.721E-01 | 158.241  | -0.237 | 4.146E-01 | 7.075E-01 |
| ENSG00000143971 | ETAA1    | 42.828   | -0.843 | 3.126E-02 | 1.733E-01 | 34.612   | -0.149 | 7.203E-01 | 8.834E-01 |
| ENSG00000087338 | GMCL1    | 232.649  | -0.525 | 3.165E-02 | 1.749E-01 | 297.536  | -0.448 | 5.335E-02 | 2.524E-01 |
| ENSG00000104695 | PPP2CB   | 677.340  | 0.446  | 3.167E-02 | 1.750E-01 | 597.073  | 0.553  | 5.467E-03 | 6.746E-02 |
| ENSG00000121274 | PAPD5    | 1510.327 | 0.437  | 3.194E-02 | 1.758E-01 | 2102.661 | 0.718  | 2.155E-03 | 3.624E-02 |
| ENSG00000276293 | PIP4K2B  | 308.825  | -0.526 | 3.247E-02 | 1.776E-01 | 172.970  | -0.488 | 1.616E-01 | 4.519E-01 |
| ENSG00000198246 | SLC29A3  | 289.183  | -0.515 | 3.257E-02 | 1.778E-01 | 254.164  | -0.424 | 9.687E-02 | 3.462E-01 |
| ENSG00000149930 | TAOK2    | 123.695  | -0.711 | 3.278E-02 | 1.781E-01 | 140.106  | -0.180 | 5.332E-01 | 7.846E-01 |
| ENSG00000180822 | PSMG4    | 304.129  | -0.512 | 3.301E-02 | 1.790E-01 | 271.716  | -0.184 | 4.854E-01 | 7.530E-01 |
| ENSG00000134291 | TMEM106C | 249.667  | -0.592 | 3.311E-02 | 1.793E-01 | 228.368  | -0.286 | 2.684E-01 | 5.781E-01 |
| ENSG00000119227 | PIGZ     | 39.663   | -0.920 | 3.317E-02 | 1.796E-01 | 51.041   | -0.301 | 4.426E-01 | 7.229E-01 |
| ENSG00000134824 | FADS2    | 134.362  | -0.750 | 3.334E-02 | 1.799E-01 | 109.479  | -0.411 | 2.605E-01 | 5.702E-01 |
| ENSG00000119559 | C19orf25 | 114.328  | -0.708 | 3.357E-02 | 1.805E-01 | 142.186  | -0.253 | 4.117E-01 | 7.054E-01 |
| ENSG00000163684 | RPP14    | 98.285   | -0.714 | 3.362E-02 | 1.807E-01 | 95.866   | -0.131 | 6.688E-01 | 8.574E-01 |
| ENSG00000124201 | ZNFX1    | 346.998  | -0.572 | 3.404E-02 | 1.819E-01 | 324.341  | -0.498 | 8.235E-02 | 3.173E-01 |
| ENSG00000185379 | RAD51D   | 109.398  | -0.689 | 3.407E-02 | 1.819E-01 | 98.081   | -0.047 | 8.843E-01 | 9.556E-01 |
| ENSG00000127774 | EMC6     | 714.306  | -0.551 | 3.419E-02 | 1.823E-01 | 1419.846 | 0.026  | 8.803E-01 | 9.541E-01 |
| ENSG00000174990 | CA5A     | 41.115   | -0.861 | 3.423E-02 | 1.824E-01 | 80.234   | -0.310 | 3.950E-01 | 6.935E-01 |
| ENSG00000130717 | UCK1     | 64.635   | -0.751 | 3.430E-02 | 1.826E-01 | 60.042   | -0.431 | 2.210E-01 | 5.265E-01 |

|                 |           |         |        |           |           |         |        |           |           |
|-----------------|-----------|---------|--------|-----------|-----------|---------|--------|-----------|-----------|
| ENSG00000110871 | COQ5      | 182.058 | -0.597 | 3.448E-02 | 1.832E-01 | 195.494 | -0.438 | 1.218E-01 | 3.915E-01 |
| ENSG00000158402 | CDC25C    | 276.472 | -0.518 | 3.484E-02 | 1.845E-01 | 253.233 | -0.489 | 6.913E-02 | 2.880E-01 |
| ENSG00000105953 | OGDH      | 67.942  | -0.771 | 3.497E-02 | 1.850E-01 | 91.661  | -0.385 | 2.196E-01 | 5.249E-01 |
| ENSG00000167880 | EVPL      | 74.909  | -0.713 | 3.503E-02 | 1.850E-01 | 66.677  | 0.024  | 9.432E-01 | 9.789E-01 |
| ENSG00000172922 | RNASEH2C  | 191.339 | -0.540 | 3.522E-02 | 1.856E-01 | 208.417 | -0.346 | 2.006E-01 | 5.028E-01 |
| ENSG00000143819 | EPHX1     | 109.300 | -0.755 | 3.554E-02 | 1.867E-01 | 108.982 | -0.349 | 3.230E-01 | 6.311E-01 |
| ENSG00000197070 | ARRDC1    | 32.776  | -0.893 | 3.570E-02 | 1.869E-01 | 22.017  | -0.005 | 9.898E-01 | NA        |
| ENSG00000135632 | SMYD5     | 197.489 | -0.576 | 3.577E-02 | 1.872E-01 | 182.584 | -0.384 | 1.855E-01 | 4.846E-01 |
| ENSG00000171155 | C1GALT1C1 | 62.414  | -0.831 | 3.582E-02 | 1.872E-01 | 38.453  | -0.026 | 9.466E-01 | 9.804E-01 |
| ENSG00000157557 | ETS2      | 693.478 | 0.425  | 3.582E-02 | 1.872E-01 | 653.441 | 0.604  | 1.194E-03 | 2.509E-02 |
| ENSG00000132004 | FBXW9     | 78.732  | -0.692 | 3.587E-02 | 1.873E-01 | 110.767 | -0.237 | 4.549E-01 | 7.339E-01 |
| ENSG00000118762 | PKD2      | 68.088  | -0.796 | 3.609E-02 | 1.879E-01 | 55.149  | -0.406 | 2.629E-01 | 5.730E-01 |
| ENSG00000137700 | SLC37A4   | 160.008 | -0.583 | 3.632E-02 | 1.883E-01 | 149.021 | 0.181  | 5.345E-01 | 7.854E-01 |
| ENSG00000167113 | COQ4      | 155.577 | -0.565 | 3.648E-02 | 1.887E-01 | 146.547 | -0.049 | 8.552E-01 | 9.448E-01 |
| ENSG00000054611 | TBC1D22A  | 192.933 | -0.538 | 3.649E-02 | 1.887E-01 | 268.889 | -0.287 | 2.865E-01 | 5.976E-01 |
| ENSG00000058668 | ATP2B4    | 30.532  | -0.888 | 3.672E-02 | 1.891E-01 | 19.193  | -0.101 | 8.101E-01 | NA        |
| ENSG00000128989 | ARPP19    | 416.363 | 0.418  | 3.673E-02 | 1.891E-01 | 376.869 | 0.565  | 9.881E-03 | 9.744E-02 |
| ENSG00000187796 | CARD9     | 34.609  | -0.900 | 3.736E-02 | 1.913E-01 | 29.200  | 0.073  | 8.605E-01 | 9.475E-01 |
| ENSG00000188211 | NCR3LG1   | 90.039  | -0.689 | 3.744E-02 | 1.916E-01 | 81.504  | -0.164 | 6.552E-01 | 8.510E-01 |
| ENSG00000148219 | ASTN2     | 88.013  | -0.654 | 3.829E-02 | 1.948E-01 | 87.362  | -0.237 | 4.484E-01 | 7.275E-01 |
| ENSG00000179761 | PIPOX     | 324.868 | -0.516 | 3.827E-02 | 1.948E-01 | 280.829 | -0.319 | 1.525E-01 | 4.401E-01 |
| ENSG00000033100 | CHPF2     | 63.586  | -0.731 | 3.843E-02 | 1.950E-01 | 66.071  | -0.221 | 5.276E-01 | 7.813E-01 |
| ENSG00000155008 | APOOL     | 158.972 | -0.600 | 3.842E-02 | 1.950E-01 | 130.584 | -0.422 | 1.595E-01 | 4.503E-01 |
| ENSG00000167693 | NXN       | 639.912 | 0.415  | 3.861E-02 | 1.954E-01 | 646.955 | 0.597  | 7.076E-03 | 7.823E-02 |
| ENSG00000130560 | UBAC1     | 303.966 | -0.514 | 3.865E-02 | 1.955E-01 | 344.809 | -0.326 | 1.542E-01 | 4.423E-01 |
| ENSG00000115364 | MRPL19    | 361.287 | 0.452  | 3.869E-02 | 1.956E-01 | 328.963 | 0.647  | 1.651E-02 | 1.314E-01 |
| ENSG00000197879 | MYO1C     | 311.289 | -0.619 | 3.900E-02 | 1.963E-01 | 340.160 | -0.300 | 2.356E-01 | 5.420E-01 |

|                 |            |         |        |           |           |         |        |           |           |
|-----------------|------------|---------|--------|-----------|-----------|---------|--------|-----------|-----------|
| ENSG00000181523 | SGSH       | 39.471  | -0.834 | 3.906E-02 | 1.965E-01 | 44.591  | -0.467 | 2.354E-01 | 5.418E-01 |
| ENSG00000198142 | SOWAHC     | 231.074 | -0.528 | 3.917E-02 | 1.969E-01 | 334.800 | -0.262 | 2.423E-01 | 5.500E-01 |
| ENSG00000139266 | MARCH9     | 33.862  | -0.838 | 3.961E-02 | 1.984E-01 | 45.071  | -0.374 | 3.213E-01 | 6.294E-01 |
| ENSG00000177106 | EPS8L2     | 553.169 | -0.507 | 3.969E-02 | 1.987E-01 | 602.887 | -0.420 | 7.790E-02 | 3.072E-01 |
| ENSG00000101544 | ADNP2      | 399.843 | 0.457  | 4.023E-02 | 2.011E-01 | 407.375 | 0.586  | 1.271E-02 | 1.131E-01 |
| ENSG00000115750 | TAF1B      | 96.812  | -0.650 | 4.056E-02 | 2.017E-01 | 139.300 | -0.339 | 2.180E-01 | 5.232E-01 |
| ENSG00000198468 | FLVCR1-AS1 | 52.715  | -0.743 | 4.077E-02 | 2.024E-01 | 57.896  | -0.197 | 5.848E-01 | 8.136E-01 |
| ENSG00000113594 | LIFR       | 95.445  | -0.737 | 4.091E-02 | 2.029E-01 | 121.070 | -0.081 | 7.935E-01 | 9.176E-01 |
| ENSG00000071462 | BUD23      | 428.116 | 0.409  | 4.106E-02 | 2.033E-01 | 392.357 | 0.704  | 1.391E-03 | 2.711E-02 |
| ENSG00000101004 | NINL       | 202.551 | -0.548 | 4.157E-02 | 2.050E-01 | 215.243 | -0.131 | 6.683E-01 | 8.572E-01 |
| ENSG00000198324 | FAM109A    | 123.813 | -0.626 | 4.171E-02 | 2.056E-01 | 120.683 | -0.179 | 6.037E-01 | 8.250E-01 |
| ENSG00000176155 | CCDC57     | 75.224  | -0.733 | 4.179E-02 | 2.059E-01 | 85.515  | -0.285 | 4.086E-01 | 7.033E-01 |
| ENSG00000111665 | CDCA3      | 350.109 | -0.504 | 4.200E-02 | 2.067E-01 | 216.060 | -0.266 | 3.120E-01 | 6.220E-01 |
| ENSG00000129810 | SGO1       | 83.838  | -0.729 | 4.206E-02 | 2.067E-01 | 95.329  | 0.098  | 7.571E-01 | 9.007E-01 |
| ENSG00000103423 | DNAJA3     | 224.051 | -0.514 | 4.213E-02 | 2.067E-01 | 220.330 | -0.082 | 7.701E-01 | 9.054E-01 |
| ENSG00000189266 | PNRC2      | 183.661 | -0.529 | 4.229E-02 | 2.069E-01 | 179.200 | -0.125 | 6.924E-01 | 8.684E-01 |
| ENSG00000153208 | MERTK      | 170.384 | -0.532 | 4.242E-02 | 2.074E-01 | 111.641 | -0.327 | 2.729E-01 | 5.826E-01 |
| ENSG00000171861 | MRM3       | 83.923  | -0.841 | 4.263E-02 | 2.080E-01 | 86.549  | 0.054  | 8.615E-01 | 9.475E-01 |
| ENSG00000253719 | ATXN7L3B   | 322.270 | -0.500 | 4.288E-02 | 2.090E-01 | 344.587 | -0.191 | 4.043E-01 | 7.008E-01 |
| ENSG00000135164 | DMTF1      | 53.620  | -0.752 | 4.345E-02 | 2.108E-01 | 60.413  | -0.437 | 2.218E-01 | 5.272E-01 |
| ENSG00000135211 | TMEM60     | 73.100  | -0.677 | 4.397E-02 | 2.126E-01 | 77.204  | -0.314 | 3.346E-01 | 6.422E-01 |
| ENSG00000147536 | GIN54      | 99.889  | -0.672 | 4.470E-02 | 2.141E-01 | 91.224  | 0.423  | 1.924E-01 | 4.932E-01 |
| ENSG00000025434 | NR1H3      | 93.676  | -0.622 | 4.489E-02 | 2.144E-01 | 92.381  | -0.020 | 9.498E-01 | 9.815E-01 |
| ENSG00000253710 | ALG11      | 185.318 | -0.530 | 4.487E-02 | 2.144E-01 | 162.717 | -0.394 | 1.837E-01 | 4.825E-01 |
| ENSG00000164050 | PLXNB1     | 164.533 | -0.569 | 4.512E-02 | 2.152E-01 | 172.958 | -0.213 | 4.937E-01 | 7.569E-01 |
| ENSG00000177595 | PIDD1      | 91.837  | -0.685 | 4.524E-02 | 2.156E-01 | 87.433  | 0.073  | 8.284E-01 | 9.321E-01 |
| ENSG00000214022 | REPIN1     | 279.786 | -0.532 | 4.542E-02 | 2.161E-01 | 288.768 | -0.167 | 4.854E-01 | 7.530E-01 |



|                 |            |         |        |           |           |         |        |           |           |
|-----------------|------------|---------|--------|-----------|-----------|---------|--------|-----------|-----------|
| ENSG00000134222 | PSRC1      | 194.212 | -0.548 | 4.550E-02 | 2.161E-01 | 146.797 | -0.335 | 1.998E-01 | 5.017E-01 |
| ENSG00000254901 | BORCS8     | 164.067 | -0.616 | 4.567E-02 | 2.162E-01 | 119.112 | -0.171 | 5.603E-01 | 7.992E-01 |
| ENSG00000272502 | AC104958.2 | 136.976 | -0.566 | 4.580E-02 | 2.166E-01 | 113.477 | -0.256 | 3.714E-01 | 6.746E-01 |
| ENSG00000179403 | VWA1       | 364.424 | -0.510 | 4.586E-02 | 2.166E-01 | 310.102 | -0.425 | 1.185E-01 | 3.861E-01 |
| ENSG00000196976 | LAGE3      | 111.774 | -0.611 | 4.595E-02 | 2.168E-01 | 119.176 | 0.023  | 9.397E-01 | 9.777E-01 |
| ENSG00000100814 | CCNB1IP1   | 295.796 | 0.487  | 4.599E-02 | 2.169E-01 | 292.276 | 0.588  | 2.279E-02 | 1.590E-01 |
| ENSG00000130810 | PPAN       | 103.545 | -0.599 | 4.609E-02 | 2.172E-01 | 74.894  | -0.405 | 2.298E-01 | 5.353E-01 |
| ENSG00000107815 | TWINK      | 185.125 | -0.530 | 4.610E-02 | 2.172E-01 | 163.879 | -0.250 | 3.759E-01 | 6.772E-01 |
| ENSG00000090520 | DNAJB11    | 449.949 | 0.437  | 4.625E-02 | 2.174E-01 | 514.260 | 0.613  | 3.032E-03 | 4.586E-02 |
| ENSG00000273344 | PAXIP1-AS1 | 83.970  | -0.694 | 4.670E-02 | 2.188E-01 | 93.077  | -0.169 | 5.950E-01 | 8.190E-01 |
| ENSG00000186767 | SPIN4      | 155.815 | -0.562 | 4.683E-02 | 2.193E-01 | 133.199 | -0.388 | 2.082E-01 | 5.110E-01 |
| ENSG00000187024 | PTRH1      | 50.149  | -0.746 | 4.697E-02 | 2.199E-01 | 43.754  | -0.107 | 7.724E-01 | 9.067E-01 |
| ENSG00000054277 | OPN3       | 93.520  | -0.629 | 4.705E-02 | 2.200E-01 | 140.960 | -0.395 | 1.504E-01 | 4.377E-01 |
| ENSG00000130021 | PUDP       | 183.617 | -0.518 | 4.721E-02 | 2.204E-01 | 188.317 | -0.264 | 3.033E-01 | 6.145E-01 |
| ENSG00000129317 | PUS7L      | 166.583 | -0.556 | 4.743E-02 | 2.211E-01 | 156.348 | -0.106 | 6.986E-01 | 8.720E-01 |
| ENSG00000162735 | PEX19      | 182.648 | -0.522 | 4.809E-02 | 2.233E-01 | 183.345 | -0.043 | 8.774E-01 | 9.526E-01 |
| ENSG00000188493 | C19orf54   | 75.667  | -0.742 | 4.815E-02 | 2.233E-01 | 63.681  | -0.363 | 3.072E-01 | 6.170E-01 |
| ENSG00000256269 | HMBS       | 210.601 | -0.514 | 4.881E-02 | 2.252E-01 | 198.616 | -0.351 | 1.773E-01 | 4.735E-01 |
| ENSG00000104177 | MYEF2      | 49.036  | -0.784 | 4.915E-02 | 2.262E-01 | 76.281  | -0.198 | 5.479E-01 | 7.916E-01 |
| ENSG00000143771 | CNIH4      | 369.562 | 0.427  | 4.994E-02 | 2.287E-01 | 357.565 | 0.549  | 1.337E-02 | 1.160E-01 |
| ENSG00000139618 | BRCA2      | 148.508 | -0.610 | 5.015E-02 | 2.293E-01 | 216.446 | -0.367 | 1.675E-01 | 4.603E-01 |
| ENSG00000185090 | MANEAL     | 169.958 | -0.571 | 5.018E-02 | 2.293E-01 | 183.419 | -0.281 | 2.960E-01 | 6.060E-01 |
| ENSG00000167601 | AXL        | 60.729  | -0.755 | 5.030E-02 | 2.295E-01 | 49.708  | 0.336  | 3.824E-01 | 6.824E-01 |
| ENSG00000164252 | AGGF1      | 165.583 | -0.575 | 5.044E-02 | 2.299E-01 | 222.074 | -0.399 | 1.181E-01 | 3.856E-01 |
| ENSG00000089050 | RBBP9      | 150.405 | -0.599 | 5.074E-02 | 2.309E-01 | 193.663 | -0.270 | 3.410E-01 | 6.489E-01 |
| ENSG00000214013 | GANC       | 83.295  | -0.666 | 5.087E-02 | 2.313E-01 | 64.472  | -0.041 | 9.105E-01 | 9.677E-01 |
| ENSG00000016864 | GLT8D1     | 194.738 | -0.605 | 5.130E-02 | 2.329E-01 | 224.494 | -0.500 | 4.701E-02 | 2.361E-01 |

|                 |            |          |        |           |           |          |        |           |           |
|-----------------|------------|----------|--------|-----------|-----------|----------|--------|-----------|-----------|
| ENSG00000175556 | LONRF3     | 29.306   | 0.844  | 5.158E-02 | 2.337E-01 | 35.398   | 0.784  | 5.155E-02 | 2.481E-01 |
| ENSG00000132376 | INPP5K     | 39.323   | -0.765 | 5.239E-02 | 2.358E-01 | 41.236   | -0.251 | 5.091E-01 | 7.670E-01 |
| ENSG00000181026 | AEN        | 1134.766 | 0.385  | 5.305E-02 | 2.379E-01 | 1014.752 | 0.514  | 1.215E-02 | 1.099E-01 |
| ENSG00000171853 | TRAPPC12   | 111.473  | -0.675 | 5.369E-02 | 2.399E-01 | 119.413  | -0.042 | 9.029E-01 | 9.639E-01 |
| ENSG00000078902 | TOLLIP     | 584.845  | 0.443  | 5.401E-02 | 2.404E-01 | 590.890  | 0.516  | 3.273E-02 | 1.932E-01 |
| ENSG00000184500 | PROS1      | 90.502   | -0.598 | 5.460E-02 | 2.420E-01 | 116.775  | -0.142 | 6.263E-01 | 8.386E-01 |
| ENSG00000177337 | DLGAP1-AS1 | 66.183   | -0.690 | 5.481E-02 | 2.421E-01 | 58.349   | -0.316 | 3.773E-01 | 6.781E-01 |
| ENSG00000225697 | SLC26A6    | 75.758   | -0.666 | 5.492E-02 | 2.421E-01 | 89.057   | 0.002  | 9.954E-01 | 9.983E-01 |
| ENSG00000177082 | WDR73      | 90.539   | -0.634 | 5.491E-02 | 2.421E-01 | 124.387  | -0.276 | 3.292E-01 | 6.370E-01 |
| ENSG00000169188 | APEX2      | 135.468  | -0.554 | 5.481E-02 | 2.421E-01 | 144.893  | -0.320 | 2.696E-01 | 5.793E-01 |
| ENSG00000122787 | AKR1D1     | 52.309   | -0.724 | 5.505E-02 | 2.424E-01 | 58.647   | -0.343 | 3.476E-01 | 6.536E-01 |
| ENSG00000176410 | DNAJC30    | 101.605  | -0.613 | 5.510E-02 | 2.425E-01 | 94.235   | -0.319 | 3.016E-01 | 6.120E-01 |
| ENSG00000111885 | MAN1A1     | 598.285  | -0.534 | 5.517E-02 | 2.427E-01 | 455.489  | -0.019 | 9.308E-01 | 9.750E-01 |
| ENSG00000138002 | IFT172     | 35.869   | -0.775 | 5.537E-02 | 2.430E-01 | 34.930   | -0.088 | 8.188E-01 | 9.271E-01 |
| ENSG00000107882 | SUFU       | 56.242   | -0.742 | 5.553E-02 | 2.430E-01 | 73.508   | -0.431 | 1.862E-01 | 4.855E-01 |
| ENSG00000240771 | ARHGEF25   | 70.886   | -0.667 | 5.549E-02 | 2.430E-01 | 61.489   | -0.080 | 8.333E-01 | 9.345E-01 |
| ENSG00000075407 | ZNF37A     | 173.010  | -0.658 | 5.548E-02 | 2.430E-01 | 223.267  | -0.295 | 2.352E-01 | 5.414E-01 |
| ENSG00000160325 | CACFD1     | 106.903  | -0.613 | 5.542E-02 | 2.430E-01 | 95.922   | -0.212 | 5.347E-01 | 7.856E-01 |
| ENSG00000133935 | ERG28      | 221.013  | -0.537 | 5.562E-02 | 2.432E-01 | 300.195  | -0.493 | 3.769E-02 | 2.090E-01 |
| ENSG00000115286 | NDUFS7     | 118.971  | -0.615 | 5.576E-02 | 2.435E-01 | 94.754   | 0.097  | 7.936E-01 | 9.176E-01 |
| ENSG00000240695 | AC117382.1 | 19.527   | 0.840  | 5.584E-02 | 2.438E-01 | 32.515   | 0.663  | 1.016E-01 | 3.564E-01 |
| ENSG00000185019 | UBOX5      | 75.881   | -0.634 | 5.603E-02 | 2.441E-01 | 75.597   | -0.396 | 2.713E-01 | 5.811E-01 |
| ENSG00000100266 | PACSIN2    | 412.082  | 0.482  | 5.628E-02 | 2.448E-01 | 423.807  | 0.622  | 2.047E-02 | 1.501E-01 |
| ENSG00000143384 | MCL1       | 1095.964 | 0.338  | 5.728E-02 | 2.478E-01 | 1292.565 | 0.534  | 7.769E-03 | 8.304E-02 |
| ENSG00000138801 | PAPSS1     | 303.784  | -0.512 | 5.743E-02 | 2.481E-01 | 295.883  | -0.365 | 1.417E-01 | 4.260E-01 |
| ENSG00000180385 | EMC3-AS1   | 57.266   | -0.676 | 5.762E-02 | 2.486E-01 | 61.338   | -0.263 | 4.822E-01 | 7.519E-01 |
| ENSG00000130787 | HIP1R      | 26.123   | 0.813  | 5.772E-02 | 2.487E-01 | 31.484   | 1.112  | 5.967E-03 | 7.083E-02 |

|                 |            |         |        |           |           |         |        |           |           |
|-----------------|------------|---------|--------|-----------|-----------|---------|--------|-----------|-----------|
| ENSG00000273559 | CWC25      | 273.999 | 0.499  | 5.788E-02 | 2.492E-01 | 264.822 | 0.665  | 1.832E-02 | 1.405E-01 |
| ENSG00000166200 | COPS2      | 408.178 | 0.399  | 5.809E-02 | 2.495E-01 | 398.152 | 0.787  | 1.208E-03 | 2.517E-02 |
| ENSG00000266680 | AL135905.1 | 50.423  | -0.724 | 5.851E-02 | 2.508E-01 | 26.169  | -0.881 | 3.573E-02 | 2.028E-01 |
| ENSG00000171793 | CTPS1      | 225.939 | -0.502 | 5.894E-02 | 2.514E-01 | 217.558 | 0.254  | 3.043E-01 | 6.153E-01 |
| ENSG00000148175 | STOM       | 228.346 | 0.452  | 5.918E-02 | 2.521E-01 | 211.074 | 0.678  | 5.332E-03 | 6.642E-02 |
| ENSG00000141219 | C17orf80   | 98.761  | -0.698 | 5.973E-02 | 2.534E-01 | 129.136 | -0.104 | 7.075E-01 | 8.767E-01 |
| ENSG00000116984 | MTR        | 246.970 | -0.500 | 6.029E-02 | 2.547E-01 | 254.507 | -0.327 | 1.695E-01 | 4.641E-01 |
| ENSG00000235954 | TTC28-AS1  | 83.618  | -0.734 | 6.054E-02 | 2.552E-01 | 93.602  | -0.429 | 2.103E-01 | 5.135E-01 |
| ENSG00000120647 | CCDC77     | 70.200  | -0.679 | 6.076E-02 | 2.556E-01 | 68.628  | -0.352 | 3.498E-01 | 6.557E-01 |
| ENSG00000254682 | AP002387.2 | 79.457  | -0.642 | 6.125E-02 | 2.567E-01 | 55.809  | -0.198 | 5.740E-01 | 8.066E-01 |
| ENSG00000158555 | GDPD5      | 120.989 | -0.531 | 6.124E-02 | 2.567E-01 | 117.892 | -0.355 | 2.304E-01 | 5.360E-01 |
| ENSG00000116212 | LRRC42     | 505.128 | 0.414  | 6.129E-02 | 2.567E-01 | 484.056 | 0.622  | 7.989E-03 | 8.492E-02 |
| ENSG00000158793 | NIT1       | 67.217  | -0.680 | 6.159E-02 | 2.577E-01 | 75.430  | -0.113 | 7.410E-01 | 8.923E-01 |
| ENSG00000267317 | AC027307.2 | 68.495  | -0.742 | 6.247E-02 | 2.599E-01 | 69.316  | -0.320 | 4.043E-01 | 7.008E-01 |
| ENSG00000147457 | CHMP7      | 99.877  | -0.589 | 6.250E-02 | 2.599E-01 | 86.526  | -0.288 | 3.620E-01 | 6.670E-01 |
| ENSG00000178802 | MPI        | 141.965 | -0.524 | 6.307E-02 | 2.615E-01 | 110.353 | -0.448 | 1.541E-01 | 4.423E-01 |
| ENSG00000140093 | SERPINA10  | 54.045  | -0.740 | 6.335E-02 | 2.623E-01 | 41.841  | -0.379 | 3.668E-01 | 6.712E-01 |
| ENSG00000158480 | SPATA2     | 185.752 | 0.490  | 6.340E-02 | 2.624E-01 | 211.363 | 0.535  | 4.479E-02 | 2.297E-01 |
| ENSG00000145220 | LYAR       | 970.176 | 0.359  | 6.369E-02 | 2.630E-01 | 842.151 | 0.542  | 8.993E-03 | 9.125E-02 |
| ENSG00000169856 | ONECUT1    | 31.143  | -0.798 | 6.394E-02 | 2.635E-01 | 48.983  | -0.442 | 2.565E-01 | 5.668E-01 |
| ENSG00000100092 | SH3BP1     | 167.922 | -0.546 | 6.408E-02 | 2.635E-01 | 129.418 | -0.077 | 8.045E-01 | 9.221E-01 |
| ENSG00000145293 | ENOPH1     | 252.768 | 0.464  | 6.410E-02 | 2.635E-01 | 236.462 | 0.535  | 2.597E-02 | 1.704E-01 |
| ENSG00000131558 | EXOC4      | 137.334 | -0.535 | 6.461E-02 | 2.647E-01 | 126.752 | -0.337 | 2.369E-01 | 5.433E-01 |
| ENSG00000110906 | KCTD10     | 209.703 | 0.500  | 6.473E-02 | 2.650E-01 | 212.674 | 0.528  | 3.915E-02 | 2.138E-01 |
| ENSG00000173614 | NMNAT1     | 40.227  | -0.753 | 6.506E-02 | 2.655E-01 | 42.416  | -0.354 | 3.688E-01 | 6.726E-01 |
| ENSG00000140939 | NOL3       | 18.056  | 0.810  | 6.550E-02 | 2.666E-01 | 37.191  | 0.739  | 5.953E-02 | 2.688E-01 |
| ENSG00000104853 | CLPTM1     | 289.729 | -0.615 | 6.572E-02 | 2.669E-01 | 208.917 | -0.257 | 4.138E-01 | 7.072E-01 |

|                 |            |         |        |           |           |         |        |           |           |
|-----------------|------------|---------|--------|-----------|-----------|---------|--------|-----------|-----------|
| ENSG00000173349 | SFT2D3     | 70.807  | -0.672 | 6.586E-02 | 2.673E-01 | 68.332  | -0.298 | 3.961E-01 | 6.949E-01 |
| ENSG00000170175 | CHRNA1     | 45.378  | -0.745 | 6.591E-02 | 2.673E-01 | 56.069  | -0.059 | 8.741E-01 | 9.523E-01 |
| ENSG00000132688 | NES        | 84.544  | -0.673 | 6.629E-02 | 2.678E-01 | 117.226 | -0.223 | 5.045E-01 | 7.642E-01 |
| ENSG00000169131 | ZNF354A    | 27.255  | 0.779  | 6.624E-02 | 2.678E-01 | 34.743  | 0.817  | 3.715E-02 | 2.072E-01 |
| ENSG00000173706 | HEG1       | 151.621 | -0.575 | 6.640E-02 | 2.680E-01 | 181.152 | -0.265 | 3.042E-01 | 6.153E-01 |
| ENSG00000137996 | RTCA       | 226.118 | 0.480  | 6.655E-02 | 2.684E-01 | 220.776 | 0.719  | 6.636E-03 | 7.522E-02 |
| ENSG00000204599 | TRIM39     | 44.064  | -0.749 | 6.671E-02 | 2.687E-01 | 78.685  | -0.300 | 4.093E-01 | 7.033E-01 |
| ENSG00000139921 | TMX1       | 145.315 | -0.541 | 6.707E-02 | 2.697E-01 | 159.611 | -0.166 | 5.605E-01 | 7.993E-01 |
| ENSG00000163320 | CGGBP1     | 207.463 | 0.498  | 6.726E-02 | 2.700E-01 | 174.945 | 0.529  | 6.736E-02 | 2.850E-01 |
| ENSG00000138180 | CEP55      | 203.856 | -0.542 | 6.730E-02 | 2.700E-01 | 283.212 | -0.144 | 5.780E-01 | 8.091E-01 |
| ENSG00000105137 | SYDE1      | 57.489  | -0.658 | 6.744E-02 | 2.702E-01 | 49.753  | -0.469 | 2.506E-01 | 5.594E-01 |
| ENSG00000085185 | BCORL1     | 73.569  | -0.683 | 6.827E-02 | 2.727E-01 | 87.024  | -0.370 | 2.287E-01 | 5.340E-01 |
| ENSG00000168268 | NT5DC2     | 385.554 | -0.509 | 6.850E-02 | 2.732E-01 | 326.057 | -0.443 | 1.249E-01 | 3.979E-01 |
| ENSG00000008086 | CDKL5      | 59.309  | -0.700 | 6.960E-02 | 2.757E-01 | 73.837  | -0.316 | 3.881E-01 | 6.866E-01 |
| ENSG00000133943 | DGLUCY     | 49.907  | -0.672 | 6.946E-02 | 2.757E-01 | 59.196  | -0.429 | 2.202E-01 | 5.253E-01 |
| ENSG00000110074 | FOXRED1    | 102.192 | -0.604 | 6.959E-02 | 2.757E-01 | 88.715  | -0.423 | 2.039E-01 | 5.056E-01 |
| ENSG00000198315 | ZKSCAN8    | 88.537  | -0.594 | 6.958E-02 | 2.757E-01 | 82.312  | -0.293 | 3.691E-01 | 6.728E-01 |
| ENSG00000139718 | SETD1B     | 98.567  | -0.557 | 6.951E-02 | 2.757E-01 | 87.119  | -0.242 | 4.595E-01 | 7.377E-01 |
| ENSG00000244300 | GATA2-AS1  | 36.124  | -0.753 | 6.993E-02 | 2.765E-01 | 32.592  | 0.040  | 9.180E-01 | 9.693E-01 |
| ENSG00000068079 | IFI35      | 56.694  | -0.669 | 7.052E-02 | 2.780E-01 | 37.335  | -0.460 | 2.562E-01 | 5.664E-01 |
| ENSG00000174791 | RIN1       | 51.719  | -0.669 | 7.061E-02 | 2.783E-01 | 49.678  | -0.130 | 7.327E-01 | 8.888E-01 |
| ENSG00000146463 | ZMYM4      | 178.699 | -0.527 | 7.084E-02 | 2.786E-01 | 243.729 | -0.399 | 1.309E-01 | 4.084E-01 |
| ENSG00000148660 | CAMK2G     | 90.323  | -0.646 | 7.159E-02 | 2.804E-01 | 78.447  | 0.405  | 2.641E-01 | 5.739E-01 |
| ENSG00000214530 | STARD10    | 103.432 | -0.554 | 7.239E-02 | 2.823E-01 | 97.511  | -0.436 | 1.744E-01 | 4.696E-01 |
| ENSG00000188811 | NHLRC3     | 62.025  | -0.665 | 7.250E-02 | 2.825E-01 | 54.260  | -0.145 | 6.958E-01 | 8.702E-01 |
| ENSG00000236924 | AL162411.1 | 36.333  | -0.768 | 7.403E-02 | 2.863E-01 | 32.964  | -0.453 | 2.688E-01 | 5.782E-01 |
| ENSG00000108961 | RANGRF     | 387.099 | 0.377  | 7.413E-02 | 2.866E-01 | 366.924 | 0.640  | 2.874E-03 | 4.405E-02 |

|                 |            |         |        |           |           |         |        |           |           |
|-----------------|------------|---------|--------|-----------|-----------|---------|--------|-----------|-----------|
| ENSG00000261324 | AC010168.2 | 43.594  | -0.728 | 7.461E-02 | 2.876E-01 | 40.464  | -0.377 | 3.454E-01 | 6.514E-01 |
| ENSG00000104679 | R3HCC1     | 75.893  | -0.628 | 7.469E-02 | 2.878E-01 | 100.127 | 0.135  | 6.458E-01 | 8.469E-01 |
| ENSG00000115255 | REEP6      | 61.515  | -0.691 | 7.473E-02 | 2.878E-01 | 63.710  | -0.472 | 2.328E-01 | 5.380E-01 |
| ENSG00000116514 | RNF19B     | 29.210  | 0.782  | 7.497E-02 | 2.884E-01 | 37.906  | 0.726  | 7.173E-02 | 2.933E-01 |
| ENSG00000158636 | EMSY       | 100.586 | -0.599 | 7.526E-02 | 2.886E-01 | 74.881  | -0.067 | 8.374E-01 | 9.360E-01 |
| ENSG00000163322 | ABRAXAS1   | 56.093  | -0.686 | 7.564E-02 | 2.895E-01 | 59.397  | -0.283 | 4.190E-01 | 7.095E-01 |
| ENSG00000163701 | IL17RE     | 88.291  | -0.684 | 7.571E-02 | 2.895E-01 | 69.692  | -0.136 | 7.242E-01 | 8.860E-01 |
| ENSG00000130844 | ZNF331     | 104.807 | -0.549 | 7.634E-02 | 2.910E-01 | 126.004 | -0.195 | 4.886E-01 | 7.536E-01 |
| ENSG00000048162 | NOP16      | 421.784 | 0.412  | 7.700E-02 | 2.924E-01 | 315.660 | 0.580  | 2.158E-02 | 1.542E-01 |
| ENSG00000136950 | ARPC5L     | 567.515 | 0.379  | 7.745E-02 | 2.937E-01 | 592.995 | 0.568  | 7.162E-03 | 7.876E-02 |
| ENSG00000228716 | DHFR       | 139.241 | -0.534 | 7.752E-02 | 2.938E-01 | 125.911 | -0.222 | 4.736E-01 | 7.471E-01 |
| ENSG00000197355 | UAP1L1     | 57.431  | -0.641 | 7.847E-02 | 2.959E-01 | 41.707  | 0.007  | 9.847E-01 | 9.936E-01 |
| ENSG00000167965 | MLST8      | 59.452  | -0.623 | 7.845E-02 | 2.959E-01 | 47.169  | 0.146  | 7.160E-01 | 8.820E-01 |
| ENSG00000100299 | ARSA       | 45.678  | -0.724 | 7.864E-02 | 2.963E-01 | 28.951  | -0.299 | 4.700E-01 | 7.453E-01 |
| ENSG00000180096 | SEPTIN1    | 44.551  | -0.696 | 7.898E-02 | 2.971E-01 | 29.026  | -0.601 | 1.485E-01 | 4.359E-01 |
| ENSG00000100154 | TTC28      | 54.617  | -0.666 | 7.900E-02 | 2.971E-01 | 72.350  | 0.115  | 7.477E-01 | 8.951E-01 |
| ENSG00000136931 | NR5A1      | 193.399 | -0.625 | 7.927E-02 | 2.976E-01 | 190.946 | -0.154 | 6.264E-01 | 8.386E-01 |
| ENSG00000136935 | GOLGA1     | 102.721 | -0.560 | 7.918E-02 | 2.976E-01 | 183.792 | -0.488 | 5.994E-02 | 2.696E-01 |
| ENSG00000106077 | ABHD11     | 39.473  | -0.695 | 7.980E-02 | 2.988E-01 | 52.879  | -0.371 | 3.164E-01 | 6.266E-01 |
| ENSG00000099246 | RAB18      | 528.786 | 0.345  | 8.005E-02 | 2.995E-01 | 496.079 | 0.513  | 1.066E-02 | 1.011E-01 |
| ENSG00000197763 | TXNRD3     | 51.529  | -0.650 | 8.026E-02 | 3.000E-01 | 37.349  | -0.294 | 4.156E-01 | 7.077E-01 |
| ENSG00000141026 | MED9       | 106.900 | -0.516 | 8.036E-02 | 3.001E-01 | 99.837  | -0.207 | 5.234E-01 | 7.781E-01 |
| ENSG00000268104 | SLC6A14    | 45.911  | -0.703 | 8.058E-02 | 3.007E-01 | 17.928  | 0.075  | 8.529E-01 | NA        |
| ENSG00000128039 | SRD5A3     | 98.066  | -0.555 | 8.085E-02 | 3.012E-01 | 109.709 | -0.124 | 6.880E-01 | 8.669E-01 |
| ENSG00000151806 | GUF1       | 103.970 | -0.631 | 8.262E-02 | 3.055E-01 | 204.432 | -0.019 | 9.405E-01 | 9.779E-01 |
| ENSG00000108641 | B9D1       | 39.648  | -0.746 | 8.302E-02 | 3.065E-01 | 42.682  | -0.262 | 4.890E-01 | 7.541E-01 |
| ENSG00000087088 | BAX        | 130.556 | -0.555 | 8.327E-02 | 3.071E-01 | 111.946 | -0.234 | 5.389E-01 | 7.874E-01 |

|                 |            |         |        |           |           |         |        |           |           |
|-----------------|------------|---------|--------|-----------|-----------|---------|--------|-----------|-----------|
| ENSG00000197766 | CFD        | 45.827  | -0.719 | 8.353E-02 | 3.075E-01 | 82.836  | -0.453 | 1.951E-01 | 4.961E-01 |
| ENSG00000130544 | ZNF557     | 61.963  | -0.627 | 8.401E-02 | 3.079E-01 | 56.179  | -0.360 | 3.219E-01 | 6.298E-01 |
| ENSG00000155959 | VBP1       | 166.634 | 0.469  | 8.401E-02 | 3.079E-01 | 183.655 | 0.513  | 4.075E-02 | 2.185E-01 |
| ENSG00000124209 | RAB22A     | 260.406 | 0.407  | 8.404E-02 | 3.080E-01 | 245.254 | 0.581  | 1.904E-02 | 1.441E-01 |
| ENSG00000158863 | FAM160B2   | 92.797  | -0.540 | 8.410E-02 | 3.081E-01 | 98.844  | -0.192 | 5.530E-01 | 7.942E-01 |
| ENSG00000279088 | AC022400.7 | 134.786 | 0.485  | 8.462E-02 | 3.096E-01 | 126.397 | 0.544  | 6.142E-02 | 2.727E-01 |
| ENSG00000120159 | CAAP1      | 131.142 | -0.521 | 8.508E-02 | 3.106E-01 | 139.752 | -0.341 | 2.275E-01 | 5.327E-01 |
| ENSG00000148572 | NRBF2      | 203.880 | 0.481  | 8.538E-02 | 3.111E-01 | 172.607 | 0.589  | 3.682E-02 | 2.065E-01 |
| ENSG00000119401 | TRIM32     | 51.946  | -0.676 | 8.566E-02 | 3.116E-01 | 60.366  | -0.103 | 7.885E-01 | 9.151E-01 |
| ENSG00000150457 | LATS2      | 91.550  | -0.629 | 8.595E-02 | 3.123E-01 | 133.970 | -0.210 | 4.853E-01 | 7.530E-01 |
| ENSG00000114790 | ARHGEF26   | 49.416  | -0.661 | 8.616E-02 | 3.128E-01 | 56.716  | -0.166 | 6.465E-01 | 8.472E-01 |
| ENSG00000154920 | EME1       | 67.800  | -0.705 | 8.688E-02 | 3.140E-01 | 72.219  | -0.471 | 1.890E-01 | 4.880E-01 |
| ENSG00000146477 | SLC22A3    | 73.919  | -0.573 | 8.737E-02 | 3.148E-01 | 63.173  | 0.036  | 9.145E-01 | 9.684E-01 |
| ENSG00000173209 | AHSA2P     | 190.156 | -0.501 | 8.736E-02 | 3.148E-01 | 268.861 | -0.309 | 2.132E-01 | 5.169E-01 |
| ENSG00000136827 | TOR1A      | 107.688 | -0.535 | 8.777E-02 | 3.161E-01 | 101.090 | -0.411 | 1.907E-01 | 4.903E-01 |
| ENSG00000147133 | TAF1       | 283.741 | -0.513 | 8.862E-02 | 3.183E-01 | 238.392 | -0.340 | 2.809E-01 | 5.921E-01 |
| ENSG00000135900 | MRPL44     | 393.416 | 0.396  | 8.899E-02 | 3.192E-01 | 336.065 | 0.577  | 1.659E-02 | 1.319E-01 |
| ENSG00000167487 | KLHL26     | 43.022  | -0.670 | 8.955E-02 | 3.201E-01 | 64.922  | -0.333 | 3.362E-01 | 6.438E-01 |
| ENSG00000136158 | SPRY2      | 28.993  | 0.734  | 8.965E-02 | 3.203E-01 | 33.275  | 0.965  | 2.040E-02 | 1.497E-01 |
| ENSG00000090432 | MUL1       | 149.082 | -0.531 | 9.011E-02 | 3.213E-01 | 162.322 | -0.079 | 7.712E-01 | 9.063E-01 |
| ENSG00000095637 | SORBS1     | 63.994  | -0.592 | 9.035E-02 | 3.219E-01 | 99.473  | -0.132 | 6.903E-01 | 8.680E-01 |
| ENSG00000247077 | PGAM5      | 232.727 | 0.460  | 9.036E-02 | 3.219E-01 | 179.285 | 0.556  | 3.726E-02 | 2.074E-01 |
| ENSG00000110422 | HIPK3      | 339.388 | 0.425  | 9.131E-02 | 3.241E-01 | 300.793 | 0.890  | 2.579E-04 | 8.882E-03 |
| ENSG00000149582 | TMEM25     | 43.709  | -0.702 | 9.201E-02 | 3.254E-01 | 41.287  | 0.249  | 5.375E-01 | 7.870E-01 |
| ENSG00000140326 | CDAN1      | 52.305  | -0.655 | 9.212E-02 | 3.254E-01 | 48.530  | -0.200 | 5.898E-01 | 8.162E-01 |
| ENSG00000196912 | ANKRD36B   | 49.019  | -0.625 | 9.208E-02 | 3.254E-01 | 52.799  | -0.393 | 2.670E-01 | 5.767E-01 |
| ENSG00000103657 | HERC1      | 158.536 | -0.509 | 9.208E-02 | 3.254E-01 | 182.062 | -0.350 | 1.889E-01 | 4.878E-01 |

|                 |              |         |        |           |           |         |        |           |           |
|-----------------|--------------|---------|--------|-----------|-----------|---------|--------|-----------|-----------|
| ENSG00000100239 | PPP6R2       | 79.423  | -0.580 | 9.225E-02 | 3.255E-01 | 93.234  | -0.300 | 4.042E-01 | 7.008E-01 |
| ENSG00000167280 | ENGASE       | 58.372  | -0.619 | 9.290E-02 | 3.268E-01 | 63.806  | -0.355 | 3.246E-01 | 6.319E-01 |
| ENSG00000151689 | INPP1        | 137.375 | 0.461  | 9.441E-02 | 3.301E-01 | 128.948 | 0.618  | 3.952E-02 | 2.150E-01 |
| ENSG00000197579 | TOPORS       | 306.857 | 0.446  | 9.495E-02 | 3.311E-01 | 323.605 | 0.667  | 9.434E-03 | 9.448E-02 |
| ENSG00000164916 | FOXK1        | 304.290 | 0.466  | 9.493E-02 | 3.311E-01 | 186.755 | 0.945  | 1.611E-03 | 2.983E-02 |
| ENSG00000145743 | FBXL17       | 101.618 | -0.559 | 9.498E-02 | 3.311E-01 | 79.323  | -0.275 | 4.144E-01 | 7.075E-01 |
| ENSG00000106477 | CEP41        | 88.144  | -0.579 | 9.502E-02 | 3.311E-01 | 89.165  | -0.132 | 6.966E-01 | 8.709E-01 |
| ENSG00000145337 | PYURF        | 272.049 | 0.413  | 9.514E-02 | 3.314E-01 | 251.050 | 0.530  | 2.616E-02 | 1.713E-01 |
| ENSG00000055208 | TAB2         | 239.926 | 0.432  | 9.583E-02 | 3.326E-01 | 245.785 | 0.820  | 1.955E-03 | 3.406E-02 |
| ENSG00000158769 | F11R         | 503.721 | 0.395  | 9.662E-02 | 3.335E-01 | 357.186 | 0.543  | 2.526E-02 | 1.679E-01 |
| ENSG00000134108 | ARL8B        | 292.145 | 0.399  | 9.698E-02 | 3.343E-01 | 407.262 | 0.619  | 5.992E-03 | 7.097E-02 |
| ENSG00000165684 | SNAPC4       | 47.109  | -0.637 | 9.736E-02 | 3.348E-01 | 53.980  | 0.462  | 2.167E-01 | 5.218E-01 |
| ENSG00000133818 | RRAS2        | 218.595 | 0.407  | 9.784E-02 | 3.361E-01 | 245.023 | 0.530  | 2.910E-02 | 1.811E-01 |
| ENSG00000114126 | TFDP2        | 45.938  | -0.634 | 9.799E-02 | 3.365E-01 | 50.327  | -0.444 | 2.367E-01 | 5.431E-01 |
| ENSG00000162600 | OMA1         | 39.062  | -0.672 | 9.839E-02 | 3.371E-01 | 37.718  | 0.069  | 8.596E-01 | 9.473E-01 |
| ENSG00000159256 | MORC3        | 157.951 | 0.482  | 9.854E-02 | 3.375E-01 | 101.573 | 0.532  | 8.031E-02 | 3.131E-01 |
| ENSG00000214855 | APOC1P1      | 75.247  | -0.598 | 9.866E-02 | 3.377E-01 | 77.497  | -0.041 | 8.997E-01 | 9.629E-01 |
| ENSG00000155903 | RASA2        | 54.091  | -0.623 | 9.912E-02 | 3.387E-01 | 51.904  | -0.101 | 8.011E-01 | 9.197E-01 |
| ENSG00000099290 | WASHC2A      | 93.445  | -0.542 | 1.003E-01 | 3.414E-01 | 97.645  | -0.418 | 2.091E-01 | 5.121E-01 |
| ENSG00000197969 | VPS13A       | 150.656 | -0.510 | 1.003E-01 | 3.414E-01 | 242.195 | -0.358 | 1.528E-01 | 4.405E-01 |
| ENSG00000166348 | USP54        | 35.362  | -0.720 | 1.015E-01 | 3.434E-01 | 46.181  | -0.082 | 8.291E-01 | 9.322E-01 |
| ENSG00000228801 | AC064807.1   | 43.635  | -0.656 | 1.018E-01 | 3.441E-01 | 30.755  | -0.223 | 5.874E-01 | 8.145E-01 |
| ENSG00000257742 | RP11-350F4.2 | 109.470 | -0.584 | 1.019E-01 | 3.442E-01 | 96.059  | -0.131 | 6.898E-01 | 8.680E-01 |
| ENSG00000221838 | AP4M1        | 59.272  | -0.586 | 1.028E-01 | 3.459E-01 | 43.453  | -0.174 | 6.594E-01 | 8.531E-01 |
| ENSG00000184083 | FAM120C      | 36.180  | -0.714 | 1.030E-01 | 3.462E-01 | 27.051  | -0.874 | 3.684E-02 | 2.065E-01 |
| ENSG00000171320 | ESCO2        | 103.305 | -0.593 | 1.030E-01 | 3.462E-01 | 85.517  | -0.409 | 2.610E-01 | 5.708E-01 |
| ENSG00000114115 | RBP1         | 154.608 | -0.563 | 1.033E-01 | 3.469E-01 | 163.143 | 0.056  | 8.688E-01 | 9.507E-01 |

|                 |            |          |        |           |           |          |        |           |           |
|-----------------|------------|----------|--------|-----------|-----------|----------|--------|-----------|-----------|
| ENSG00000119318 | RAD23B     | 1356.902 | 0.322  | 1.041E-01 | 3.486E-01 | 1263.475 | 0.504  | 1.998E-02 | 1.486E-01 |
| ENSG00000232838 | PET117     | 70.000   | -0.607 | 1.050E-01 | 3.497E-01 | 73.323   | 0.113  | 7.383E-01 | 8.914E-01 |
| ENSG00000125968 | ID1        | 5208.596 | 0.379  | 1.050E-01 | 3.497E-01 | 4104.769 | 0.724  | 1.751E-06 | 1.754E-04 |
| ENSG00000120029 | C10orf76   | 105.847  | 0.495  | 1.053E-01 | 3.502E-01 | 92.928   | 0.798  | 1.000E-02 | 9.753E-02 |
| ENSG00000229539 | AL353194.1 | 44.298   | -0.630 | 1.054E-01 | 3.502E-01 | 35.088   | -0.384 | 3.422E-01 | 6.489E-01 |
| ENSG00000131469 | RPL27      | 6579.516 | 0.276  | 1.068E-01 | 3.522E-01 | 5420.429 | 0.555  | 1.961E-02 | 1.472E-01 |
| ENSG00000131773 | KHDRBS3    | 210.545  | 0.477  | 1.068E-01 | 3.522E-01 | 164.370  | 0.613  | 2.754E-02 | 1.745E-01 |
| ENSG00000137070 | IL11RA     | 34.959   | -0.644 | 1.075E-01 | 3.535E-01 | 29.251   | 0.167  | 6.829E-01 | 8.640E-01 |
| ENSG00000164961 | WASHC5     | 57.438   | -0.616 | 1.082E-01 | 3.548E-01 | 52.812   | 0.257  | 4.765E-01 | 7.493E-01 |
| ENSG00000127993 | RBM48      | 42.890   | -0.627 | 1.088E-01 | 3.560E-01 | 41.274   | -0.273 | 4.685E-01 | 7.440E-01 |
| ENSG00000100058 | CRYBB2P1   | 105.120  | 0.495  | 1.087E-01 | 3.560E-01 | 105.173  | 0.883  | 7.759E-03 | 8.303E-02 |
| ENSG00000167005 | NUDT21     | 885.982  | 0.407  | 1.090E-01 | 3.564E-01 | 623.795  | 0.578  | 2.639E-02 | 1.714E-01 |
| ENSG00000182749 | PAQR7      | 55.522   | -0.612 | 1.095E-01 | 3.574E-01 | 82.772   | 0.339  | 3.836E-01 | 6.829E-01 |
| ENSG00000123178 | SPRYD7     | 127.276  | 0.465  | 1.099E-01 | 3.582E-01 | 137.954  | 0.505  | 1.010E-01 | 3.556E-01 |
| ENSG00000169684 | CHRNA5     | 47.686   | -0.598 | 1.101E-01 | 3.583E-01 | 41.809   | -0.174 | 6.166E-01 | 8.320E-01 |
| ENSG00000233429 | HOTAIRM1   | 23.686   | 0.693  | 1.107E-01 | 3.598E-01 | 39.516   | 0.705  | 6.510E-02 | 2.793E-01 |
| ENSG00000129657 | SEC14L1    | 334.223  | 0.374  | 1.110E-01 | 3.604E-01 | 307.357  | 0.514  | 4.039E-02 | 2.177E-01 |
| ENSG00000120686 | UFM1       | 316.641  | 0.416  | 1.112E-01 | 3.609E-01 | 233.043  | 0.701  | 5.908E-03 | 7.037E-02 |
| ENSG00000131188 | PRR7       | 77.155   | -0.547 | 1.118E-01 | 3.622E-01 | 80.836   | -0.177 | 6.435E-01 | 8.453E-01 |
| ENSG00000154146 | NRGN       | 36.460   | -0.663 | 1.125E-01 | 3.633E-01 | 29.273   | 0.072  | 8.615E-01 | 9.475E-01 |
| ENSG00000117751 | PPP1R8     | 461.267  | 0.355  | 1.141E-01 | 3.664E-01 | 388.750  | 0.537  | 1.122E-02 | 1.045E-01 |
| ENSG00000205356 | TECPR1     | 42.917   | -0.621 | 1.144E-01 | 3.666E-01 | 53.333   | -0.469 | 2.114E-01 | 5.147E-01 |
| ENSG00000136280 | CCM2       | 63.713   | -0.590 | 1.147E-01 | 3.670E-01 | 56.179   | -0.460 | 2.285E-01 | 5.340E-01 |
| ENSG00000204267 | TAP2       | 387.277  | 0.359  | 1.155E-01 | 3.682E-01 | 308.918  | 0.548  | 6.471E-02 | 2.787E-01 |
| ENSG00000101413 | RPRD1B     | 265.674  | 0.444  | 1.161E-01 | 3.692E-01 | 225.682  | 0.553  | 2.484E-02 | 1.668E-01 |
| ENSG00000163703 | CRELD1     | 89.206   | -0.515 | 1.165E-01 | 3.698E-01 | 78.716   | -0.394 | 2.679E-01 | 5.776E-01 |
| ENSG00000147854 | UHRF2      | 237.372  | 0.399  | 1.169E-01 | 3.702E-01 | 191.554  | 0.612  | 2.087E-02 | 1.519E-01 |



|                 |          |         |        |           |           |         |        |           |           |
|-----------------|----------|---------|--------|-----------|-----------|---------|--------|-----------|-----------|
| ENSG00000162105 | SHANK2   | 81.090  | -0.579 | 1.174E-01 | 3.708E-01 | 85.580  | -0.240 | 4.610E-01 | 7.388E-01 |
| ENSG00000134250 | NOTCH2   | 36.224  | -0.657 | 1.177E-01 | 3.713E-01 | 33.573  | -0.032 | 9.371E-01 | 9.770E-01 |
| ENSG00000108984 | MAP2K6   | 72.894  | -0.628 | 1.177E-01 | 3.713E-01 | 72.540  | -0.141 | 6.691E-01 | 8.575E-01 |
| ENSG00000114933 | INO80D   | 184.780 | 0.451  | 1.179E-01 | 3.717E-01 | 144.032 | 0.564  | 4.505E-02 | 2.302E-01 |
| ENSG00000065970 | FOXJ2    | 113.713 | 0.493  | 1.189E-01 | 3.739E-01 | 101.208 | 0.847  | 6.939E-03 | 7.746E-02 |
| ENSG00000173588 | CEP83    | 85.074  | -0.541 | 1.194E-01 | 3.748E-01 | 87.493  | 0.038  | 9.116E-01 | 9.679E-01 |
| ENSG00000155304 | HSPA13   | 141.608 | 0.486  | 1.196E-01 | 3.750E-01 | 101.922 | 1.291  | 1.038E-04 | 4.675E-03 |
| ENSG00000138658 | ZGRF1    | 33.426  | -0.658 | 1.205E-01 | 3.768E-01 | 22.381  | -0.299 | 4.689E-01 | NA        |
| ENSG00000171202 | TMEM126A | 135.128 | 0.449  | 1.221E-01 | 3.791E-01 | 144.106 | 0.659  | 2.536E-02 | 1.685E-01 |
| ENSG00000257017 | HP       | 79.228  | -0.551 | 1.235E-01 | 3.809E-01 | 94.509  | -0.209 | 5.133E-01 | 7.696E-01 |
| ENSG00000132275 | RRP8     | 119.971 | 0.477  | 1.236E-01 | 3.811E-01 | 162.022 | 0.624  | 3.424E-02 | 1.991E-01 |
| ENSG00000114735 | HEMK1    | 51.989  | -0.560 | 1.240E-01 | 3.816E-01 | 44.540  | -0.252 | 5.021E-01 | 7.624E-01 |
| ENSG00000106404 | CLDN15   | 73.512  | -0.534 | 1.241E-01 | 3.816E-01 | 70.401  | -0.375 | 2.770E-01 | 5.876E-01 |
| ENSG00000198816 | ZNF358   | 57.627  | -0.595 | 1.245E-01 | 3.821E-01 | 49.033  | 0.002  | 9.964E-01 | 9.989E-01 |
| ENSG00000174456 | C12orf76 | 78.146  | -0.503 | 1.250E-01 | 3.832E-01 | 95.886  | -0.097 | 7.654E-01 | 9.039E-01 |
| ENSG00000188313 | PLSCR1   | 67.811  | -0.537 | 1.251E-01 | 3.833E-01 | 59.005  | -0.130 | 7.401E-01 | 8.922E-01 |
| ENSG00000107443 | CCNJ     | 134.931 | 0.437  | 1.252E-01 | 3.834E-01 | 135.385 | 0.533  | 5.726E-02 | 2.624E-01 |
| ENSG00000005059 | MCUB     | 45.356  | -0.614 | 1.259E-01 | 3.849E-01 | 49.107  | -0.279 | 4.673E-01 | 7.433E-01 |
| ENSG00000086696 | HSD17B2  | 48.654  | -0.572 | 1.260E-01 | 3.849E-01 | 61.675  | -0.396 | 2.720E-01 | 5.822E-01 |
| ENSG00000167566 | NCKAP5L  | 54.784  | -0.563 | 1.266E-01 | 3.864E-01 | 58.848  | -0.359 | 3.125E-01 | 6.222E-01 |
| ENSG00000146067 | FAM193B  | 39.737  | -0.601 | 1.270E-01 | 3.868E-01 | 32.309  | -0.457 | 2.472E-01 | 5.552E-01 |
| ENSG00000130813 | C19orf66 | 55.712  | -0.562 | 1.269E-01 | 3.868E-01 | 76.631  | -0.261 | 4.259E-01 | 7.138E-01 |
| ENSG00000115568 | ZNF142   | 57.344  | -0.607 | 1.277E-01 | 3.883E-01 | 74.653  | 0.248  | 4.521E-01 | 7.306E-01 |
| ENSG00000170445 | HARS     | 141.026 | -0.527 | 1.277E-01 | 3.883E-01 | 180.991 | 0.020  | 9.360E-01 | 9.765E-01 |
| ENSG00000188725 | SMIM15   | 289.586 | 0.342  | 1.279E-01 | 3.884E-01 | 279.454 | 0.589  | 1.894E-02 | 1.440E-01 |
| ENSG00000011332 | DPF1     | 65.331  | -0.536 | 1.284E-01 | 3.893E-01 | 53.795  | -0.028 | 9.361E-01 | 9.765E-01 |
| ENSG00000135845 | PIGC     | 198.263 | 0.431  | 1.286E-01 | 3.893E-01 | 167.458 | 0.816  | 1.654E-03 | 3.030E-02 |

|                 |            |         |        |           |           |         |        |           |           |
|-----------------|------------|---------|--------|-----------|-----------|---------|--------|-----------|-----------|
| ENSG00000077152 | UBE2T      | 276.068 | -0.446 | 1.291E-01 | 3.899E-01 | 200.627 | 0.548  | 4.072E-02 | 2.185E-01 |
| ENSG00000115128 | SF3B6      | 420.363 | 0.364  | 1.290E-01 | 3.899E-01 | 406.885 | 0.530  | 3.520E-02 | 2.016E-01 |
| ENSG00000091157 | WDR7       | 37.829  | -0.607 | 1.293E-01 | 3.899E-01 | 36.240  | -0.156 | 7.024E-01 | 8.743E-01 |
| ENSG00000198081 | ZBTB14     | 31.775  | -0.633 | 1.303E-01 | 3.921E-01 | 49.571  | -0.254 | 5.190E-01 | 7.744E-01 |
| ENSG00000152223 | EPG5       | 33.150  | -0.649 | 1.311E-01 | 3.935E-01 | 40.552  | -0.244 | 5.271E-01 | 7.810E-01 |
| ENSG00000137842 | TMEM62     | 49.233  | -0.591 | 1.326E-01 | 3.965E-01 | 74.685  | 0.256  | 4.351E-01 | 7.198E-01 |
| ENSG00000188070 | C11orf95   | 100.749 | -0.503 | 1.327E-01 | 3.965E-01 | 112.060 | -0.245 | 4.072E-01 | 7.025E-01 |
| ENSG00000141376 | BCAS3      | 53.996  | -0.604 | 1.334E-01 | 3.973E-01 | 68.599  | -0.116 | 7.359E-01 | 8.906E-01 |
| ENSG00000145022 | TCTA       | 56.176  | -0.549 | 1.347E-01 | 3.993E-01 | 72.694  | 0.111  | 7.462E-01 | 8.942E-01 |
| ENSG00000157450 | RNF111     | 55.679  | -0.543 | 1.361E-01 | 4.015E-01 | 59.323  | 0.430  | 2.479E-01 | 5.564E-01 |
| ENSG00000171960 | PPIH       | 445.511 | 0.312  | 1.363E-01 | 4.015E-01 | 394.820 | 0.630  | 4.111E-03 | 5.648E-02 |
| ENSG00000160602 | NEK8       | 55.075  | -0.563 | 1.366E-01 | 4.016E-01 | 71.488  | -0.335 | 3.458E-01 | 6.516E-01 |
| ENSG00000157800 | SLC37A3    | 93.426  | -0.542 | 1.364E-01 | 4.016E-01 | 96.772  | 0.094  | 7.869E-01 | 9.142E-01 |
| ENSG00000197302 | ZNF720     | 90.767  | -0.506 | 1.365E-01 | 4.016E-01 | 133.934 | -0.183 | 5.462E-01 | 7.908E-01 |
| ENSG00000269834 | ZNF528-AS1 | 25.876  | 0.645  | 1.372E-01 | 4.027E-01 | 42.812  | 0.816  | 3.335E-02 | 1.959E-01 |
| ENSG00000057757 | PITHD1     | 197.455 | 0.365  | 1.376E-01 | 4.034E-01 | 170.264 | 0.508  | 5.748E-02 | 2.629E-01 |
| ENSG00000036672 | USP2       | 49.158  | -0.575 | 1.387E-01 | 4.053E-01 | 63.163  | -0.217 | 5.716E-01 | 8.059E-01 |
| ENSG00000101049 | SGK2       | 92.050  | -0.510 | 1.395E-01 | 4.070E-01 | 89.124  | 0.055  | 8.550E-01 | 9.447E-01 |
| ENSG00000184307 | ZDHHC23    | 46.056  | -0.623 | 1.396E-01 | 4.071E-01 | 43.136  | -0.207 | 5.886E-01 | 8.153E-01 |
| ENSG00000130427 | EPO        | 45.754  | -0.574 | 1.397E-01 | 4.072E-01 | 25.166  | -0.181 | 6.640E-01 | 8.547E-01 |
| ENSG00000105676 | ARMC6      | 71.364  | -0.529 | 1.398E-01 | 4.075E-01 | 78.188  | 0.319  | 3.597E-01 | 6.649E-01 |
| ENSG00000123411 | IKZF4      | 50.714  | -0.547 | 1.400E-01 | 4.077E-01 | 58.327  | -0.473 | 1.968E-01 | 4.979E-01 |
| ENSG00000163374 | YY1AP1     | 248.246 | 0.382  | 1.413E-01 | 4.099E-01 | 261.366 | 0.603  | 1.008E-02 | 9.784E-02 |
| ENSG00000090924 | PLEKHG2    | 31.359  | -0.641 | 1.427E-01 | 4.121E-01 | 46.196  | -0.114 | 7.702E-01 | 9.054E-01 |
| ENSG00000166908 | PIP4K2C    | 317.949 | 0.355  | 1.429E-01 | 4.121E-01 | 213.609 | 0.549  | 4.946E-02 | 2.417E-01 |
| ENSG00000198874 | TYW1       | 104.544 | 0.452  | 1.427E-01 | 4.121E-01 | 91.794  | 0.622  | 4.829E-02 | 2.389E-01 |
| ENSG00000103260 | METRN      | 83.525  | -0.514 | 1.432E-01 | 4.125E-01 | 83.626  | -0.164 | 6.756E-01 | 8.605E-01 |

|                 |          |          |        |           |           |          |        |           |           |
|-----------------|----------|----------|--------|-----------|-----------|----------|--------|-----------|-----------|
| ENSG00000087299 | L2HGDH   | 33.392   | -0.641 | 1.448E-01 | 4.147E-01 | 59.514   | -0.482 | 2.286E-01 | 5.340E-01 |
| ENSG00000168394 | TAP1     | 180.695  | 0.381  | 1.450E-01 | 4.150E-01 | 188.090  | 0.633  | 1.899E-02 | 1.440E-01 |
| ENSG00000135476 | ESPL1    | 44.912   | -0.589 | 1.453E-01 | 4.152E-01 | 37.686   | -0.053 | 8.905E-01 | 9.586E-01 |
| ENSG00000100575 | TIMM9    | 303.983  | 0.367  | 1.456E-01 | 4.156E-01 | 245.341  | 0.710  | 2.401E-03 | 3.909E-02 |
| ENSG00000180098 | TRNAU1AP | 64.881   | -0.587 | 1.459E-01 | 4.161E-01 | 89.480   | -0.361 | 2.547E-01 | 5.650E-01 |
| ENSG00000180228 | PRKRA    | 132.521  | 0.408  | 1.459E-01 | 4.161E-01 | 227.041  | 0.543  | 3.186E-02 | 1.907E-01 |
| ENSG00000264229 | RNU4ATAC | 2397.821 | -0.628 | 1.460E-01 | 4.162E-01 | 2808.727 | 0.064  | 8.778E-01 | 9.526E-01 |
| ENSG00000141577 | CEP131   | 36.910   | -0.588 | 1.464E-01 | 4.171E-01 | 39.483   | -0.307 | 4.359E-01 | 7.202E-01 |
| ENSG00000167114 | SLC27A4  | 45.867   | -0.572 | 1.467E-01 | 4.173E-01 | 67.164   | -0.168 | 6.356E-01 | 8.417E-01 |
| ENSG00000111364 | DDX55    | 292.009  | 0.371  | 1.465E-01 | 4.173E-01 | 281.289  | 0.518  | 6.557E-02 | 2.805E-01 |
| ENSG00000170085 | SIMC1    | 47.480   | -0.555 | 1.484E-01 | 4.209E-01 | 49.297   | 0.034  | 9.235E-01 | 9.719E-01 |
| ENSG00000066813 | ACSM2B   | 38.641   | -0.620 | 1.501E-01 | 4.245E-01 | 57.984   | -0.378 | 3.169E-01 | 6.270E-01 |
| ENSG00000135100 | HNF1A    | 73.482   | -0.515 | 1.511E-01 | 4.262E-01 | 83.311   | -0.058 | 8.711E-01 | 9.512E-01 |
| ENSG00000076554 | TPD52    | 197.277  | 0.361  | 1.512E-01 | 4.262E-01 | 165.293  | 0.517  | 6.545E-02 | 2.802E-01 |
| ENSG00000175606 | TMEM70   | 156.213  | 0.416  | 1.511E-01 | 4.262E-01 | 140.110  | 0.540  | 7.553E-02 | 3.023E-01 |
| ENSG00000131470 | PSMC3IP  | 107.812  | -0.547 | 1.517E-01 | 4.271E-01 | 88.872   | 0.154  | 6.447E-01 | 8.462E-01 |
| ENSG00000139687 | RB1      | 73.145   | -0.591 | 1.527E-01 | 4.293E-01 | 124.465  | 0.243  | 4.738E-01 | 7.471E-01 |
| ENSG00000126461 | SCAF1    | 103.959  | -0.519 | 1.530E-01 | 4.297E-01 | 75.586   | 0.084  | 8.270E-01 | 9.315E-01 |
| ENSG00000113971 | NPHP3    | 54.386   | -0.578 | 1.534E-01 | 4.303E-01 | 66.751   | -0.421 | 2.199E-01 | 5.250E-01 |
| ENSG00000241935 | HOGA1    | 32.998   | -0.573 | 1.537E-01 | 4.305E-01 | 42.973   | -0.286 | 4.730E-01 | 7.468E-01 |
| ENSG00000162437 | RAVER2   | 90.950   | -0.541 | 1.537E-01 | 4.305E-01 | 82.949   | -0.408 | 2.418E-01 | 5.495E-01 |
| ENSG00000220205 | VAMP2    | 144.419  | 0.477  | 1.537E-01 | 4.305E-01 | 112.582  | 0.675  | 4.956E-02 | 2.419E-01 |
| ENSG00000114784 | EIF1B    | 362.534  | 0.339  | 1.546E-01 | 4.323E-01 | 335.115  | 0.690  | 4.112E-03 | 5.648E-02 |
| ENSG00000214189 | ZNF788   | 34.861   | -0.574 | 1.558E-01 | 4.338E-01 | 29.223   | -0.177 | 6.596E-01 | 8.532E-01 |
| ENSG00000276291 | FRG1HP   | 57.456   | -0.517 | 1.570E-01 | 4.358E-01 | 82.484   | 0.067  | 8.428E-01 | 9.393E-01 |
| ENSG00000004700 | RECQL    | 93.332   | -0.502 | 1.578E-01 | 4.368E-01 | 72.822   | -0.088 | 7.879E-01 | 9.148E-01 |
| ENSG00000107874 | CUEDC2   | 36.702   | -0.559 | 1.582E-01 | 4.371E-01 | 62.427   | -0.435 | 2.368E-01 | 5.433E-01 |

|                 |            |         |        |           |           |         |        |           |           |
|-----------------|------------|---------|--------|-----------|-----------|---------|--------|-----------|-----------|
| ENSG00000148120 | C9orf3     | 110.137 | 0.448  | 1.586E-01 | 4.377E-01 | 123.023 | 0.767  | 8.328E-03 | 8.740E-02 |
| ENSG00000146215 | CRIP3      | 37.088  | -0.594 | 1.595E-01 | 4.386E-01 | 23.039  | -0.816 | 5.067E-02 | 2.451E-01 |
| ENSG00000120685 | PROSER1    | 151.556 | 0.393  | 1.603E-01 | 4.396E-01 | 150.811 | 0.578  | 4.827E-02 | 2.389E-01 |
| ENSG00000080371 | RAB21      | 279.668 | 0.368  | 1.607E-01 | 4.401E-01 | 193.450 | 0.572  | 5.770E-02 | 2.633E-01 |
| ENSG00000137806 | NDUFAF1    | 61.382  | -0.508 | 1.609E-01 | 4.403E-01 | 52.407  | 0.164  | 6.542E-01 | 8.507E-01 |
| ENSG00000078487 | ZCWPW1     | 29.153  | 0.603  | 1.616E-01 | 4.411E-01 | 38.009  | 0.671  | 9.288E-02 | 3.381E-01 |
| ENSG00000014123 | UFL1       | 243.337 | 0.337  | 1.620E-01 | 4.417E-01 | 248.412 | 0.506  | 4.805E-02 | 2.383E-01 |
| ENSG00000116157 | GPX7       | 45.154  | -0.529 | 1.623E-01 | 4.422E-01 | 52.905  | -0.275 | 4.421E-01 | 7.229E-01 |
| ENSG00000152520 | PAN3       | 77.832  | 0.468  | 1.627E-01 | 4.427E-01 | 92.271  | 0.841  | 9.384E-03 | 9.407E-02 |
| ENSG00000275457 | AL117332.1 | 34.497  | -0.576 | 1.645E-01 | 4.456E-01 | 29.883  | 0.439  | 2.958E-01 | 6.057E-01 |
| ENSG00000103888 | CEMIP      | 61.950  | -0.541 | 1.645E-01 | 4.456E-01 | 60.447  | -0.148 | 7.027E-01 | 8.744E-01 |
| ENSG00000249673 | NOP14-AS1  | 48.464  | -0.585 | 1.650E-01 | 4.462E-01 | 38.977  | -0.200 | 6.095E-01 | 8.279E-01 |
| ENSG00000179041 | RRS1       | 232.597 | 0.413  | 1.661E-01 | 4.479E-01 | 185.186 | 0.815  | 3.279E-03 | 4.846E-02 |
| ENSG00000212283 | SNORD89    | 36.234  | -0.592 | 1.678E-01 | 4.505E-01 | 54.872  | 0.575  | 1.618E-01 | 4.519E-01 |
| ENSG00000175073 | VCPIP1     | 38.688  | -0.585 | 1.680E-01 | 4.506E-01 | 46.891  | -0.295 | 4.639E-01 | 7.409E-01 |
| ENSG00000100439 | ABHD4      | 96.962  | 0.452  | 1.680E-01 | 4.506E-01 | 97.119  | 0.567  | 6.762E-02 | 2.853E-01 |
| ENSG00000162227 | TAF6L      | 34.530  | -0.587 | 1.690E-01 | 4.519E-01 | 19.883  | -0.079 | 8.504E-01 | NA        |
| ENSG00000069943 | PIGB       | 32.151  | -0.585 | 1.692E-01 | 4.521E-01 | 38.884  | 0.001  | 9.988E-01 | 9.997E-01 |
| ENSG00000141543 | EIF4A3     | 889.746 | 0.283  | 1.692E-01 | 4.521E-01 | 910.886 | 0.508  | 7.322E-03 | 7.959E-02 |
| ENSG00000146757 | ZNF92      | 33.021  | -0.579 | 1.700E-01 | 4.537E-01 | 31.752  | -0.166 | 6.910E-01 | 8.681E-01 |
| ENSG00000173530 | TNFRSF10D  | 207.457 | 0.374  | 1.713E-01 | 4.554E-01 | 168.477 | 0.538  | 4.539E-02 | 2.311E-01 |
| ENSG00000259642 | ST20-AS1   | 30.777  | -0.595 | 1.714E-01 | 4.554E-01 | 35.185  | -0.199 | 6.145E-01 | 8.308E-01 |
| ENSG00000205707 | ETFRF1     | 30.292  | -0.565 | 1.729E-01 | 4.577E-01 | 34.533  | -0.471 | 2.599E-01 | 5.702E-01 |
| ENSG00000253797 | UTP14C     | 85.923  | -0.501 | 1.730E-01 | 4.577E-01 | 99.178  | -0.079 | 8.070E-01 | 9.231E-01 |
| ENSG00000102384 | CENPI      | 48.761  | -0.575 | 1.733E-01 | 4.580E-01 | 51.286  | -0.231 | 5.416E-01 | 7.884E-01 |
| ENSG00000141985 | SH3GL1     | 674.226 | 0.295  | 1.734E-01 | 4.580E-01 | 747.726 | 0.672  | 1.143E-02 | 1.055E-01 |
| ENSG00000153574 | RPIA       | 394.235 | 0.342  | 1.738E-01 | 4.585E-01 | 275.861 | 0.755  | 6.073E-03 | 7.173E-02 |

|                 |            |         |        |           |           |         |        |           |           |
|-----------------|------------|---------|--------|-----------|-----------|---------|--------|-----------|-----------|
| ENSG00000124786 | SLC35B3    | 48.169  | -0.561 | 1.781E-01 | 4.651E-01 | 46.107  | -0.054 | 8.874E-01 | 9.571E-01 |
| ENSG00000122644 | ARL4A      | 263.708 | 0.359  | 1.782E-01 | 4.651E-01 | 280.564 | 0.570  | 2.115E-02 | 1.527E-01 |
| ENSG00000175634 | RPS6KB2    | 76.869  | -0.533 | 1.785E-01 | 4.654E-01 | 35.845  | -0.294 | 4.646E-01 | 7.413E-01 |
| ENSG00000043143 | JADE2      | 62.155  | -0.504 | 1.787E-01 | 4.656E-01 | 39.969  | 0.093  | 8.107E-01 | 9.241E-01 |
| ENSG00000236810 | ELOA-AS1   | 44.818  | -0.545 | 1.788E-01 | 4.657E-01 | 46.221  | 0.444  | 2.445E-01 | 5.531E-01 |
| ENSG00000153046 | CDYL       | 240.587 | 0.314  | 1.789E-01 | 4.657E-01 | 255.183 | 0.530  | 2.881E-02 | 1.802E-01 |
| ENSG00000137942 | FBNP1L     | 195.639 | 0.426  | 1.794E-01 | 4.666E-01 | 271.096 | 0.552  | 2.409E-02 | 1.648E-01 |
| ENSG00000188290 | HES4       | 108.900 | 0.444  | 1.802E-01 | 4.676E-01 | 105.259 | 0.780  | 2.738E-02 | 1.741E-01 |
| ENSG00000122778 | KIAA1549   | 30.430  | -0.588 | 1.807E-01 | 4.685E-01 | 28.254  | 0.351  | 3.829E-01 | 6.825E-01 |
| ENSG00000065357 | DGKA       | 48.383  | -0.522 | 1.810E-01 | 4.687E-01 | 55.492  | -0.171 | 6.296E-01 | 8.395E-01 |
| ENSG00000174939 | ASPHD1     | 81.468  | -0.524 | 1.816E-01 | 4.690E-01 | 84.537  | 0.159  | 6.592E-01 | 8.531E-01 |
| ENSG00000101639 | CEP192     | 40.588  | -0.536 | 1.819E-01 | 4.693E-01 | 47.905  | -0.218 | 5.856E-01 | 8.137E-01 |
| ENSG00000145214 | DGKQ       | 46.729  | -0.552 | 1.825E-01 | 4.696E-01 | 90.770  | 0.160  | 6.381E-01 | 8.430E-01 |
| ENSG00000042088 | TDP1       | 66.108  | -0.503 | 1.831E-01 | 4.704E-01 | 101.131 | -0.187 | 5.487E-01 | 7.916E-01 |
| ENSG00000100077 | GRK3       | 32.743  | -0.577 | 1.835E-01 | 4.705E-01 | 69.782  | 0.343  | 3.178E-01 | 6.275E-01 |
| ENSG00000260231 | JHDM1D-AS1 | 38.465  | -0.538 | 1.833E-01 | 4.705E-01 | 31.878  | -0.021 | 9.571E-01 | 9.839E-01 |
| ENSG00000144959 | NCEH1      | 50.195  | -0.523 | 1.835E-01 | 4.705E-01 | 50.375  | -0.376 | 2.950E-01 | 6.049E-01 |
| ENSG00000171453 | POLR1C     | 252.048 | 0.352  | 1.835E-01 | 4.705E-01 | 328.876 | 0.639  | 4.935E-03 | 6.328E-02 |
| ENSG00000109107 | ALDOC      | 31.867  | -0.582 | 1.838E-01 | 4.708E-01 | 51.333  | -0.153 | 6.774E-01 | 8.610E-01 |
| ENSG00000138686 | BBS7       | 93.009  | 0.418  | 1.846E-01 | 4.722E-01 | 104.055 | 0.667  | 4.936E-02 | 2.415E-01 |
| ENSG00000164823 | OSGIN2     | 76.603  | 0.454  | 1.858E-01 | 4.738E-01 | 87.908  | 0.669  | 3.838E-02 | 2.115E-01 |
| ENSG00000135655 | USP15      | 122.236 | 0.391  | 1.860E-01 | 4.740E-01 | 193.019 | 0.718  | 1.035E-02 | 9.898E-02 |
| ENSG00000141956 | PRDM15     | 32.209  | -0.557 | 1.861E-01 | 4.740E-01 | 25.684  | -0.718 | 8.273E-02 | 3.181E-01 |
| ENSG00000172732 | MUS81      | 96.787  | 0.446  | 1.861E-01 | 4.740E-01 | 78.728  | 0.797  | 2.350E-02 | 1.621E-01 |
| ENSG00000137955 | RABGGTB    | 125.257 | 0.426  | 1.864E-01 | 4.743E-01 | 116.099 | 0.533  | 7.003E-02 | 2.898E-01 |
| ENSG00000172766 | NAA16      | 115.864 | 0.412  | 1.870E-01 | 4.753E-01 | 138.724 | 0.636  | 2.729E-02 | 1.740E-01 |
| ENSG00000104228 | TRIM35     | 95.753  | 0.415  | 1.881E-01 | 4.764E-01 | 94.785  | 0.705  | 2.945E-02 | 1.822E-01 |

|                 |            |         |        |           |           |         |        |           |           |
|-----------------|------------|---------|--------|-----------|-----------|---------|--------|-----------|-----------|
| ENSG00000184697 | CLDN6      | 85.833  | 0.488  | 1.883E-01 | 4.764E-01 | 110.878 | 0.528  | 1.378E-01 | 4.195E-01 |
| ENSG00000007255 | TRAPPC6A   | 33.317  | -0.568 | 1.888E-01 | 4.770E-01 | 39.637  | -0.392 | 2.492E-01 | 5.582E-01 |
| ENSG00000158373 | HIST1H2BD  | 32.307  | -0.562 | 1.913E-01 | 4.795E-01 | 22.423  | -0.108 | 7.970E-01 | NA        |
| ENSG00000132356 | PRKAA1     | 101.367 | 0.445  | 1.922E-01 | 4.811E-01 | 119.345 | 0.982  | 1.737E-03 | 3.133E-02 |
| ENSG00000151876 | FBXO4      | 69.879  | -0.555 | 1.930E-01 | 4.825E-01 | 85.739  | -0.239 | 4.457E-01 | 7.255E-01 |
| ENSG00000007062 | PROM1      | 42.010  | -0.531 | 1.934E-01 | 4.830E-01 | 53.253  | 0.258  | 5.064E-01 | 7.649E-01 |
| ENSG00000135119 | RNFT2      | 35.760  | -0.555 | 1.935E-01 | 4.830E-01 | 53.812  | -0.080 | 8.260E-01 | 9.308E-01 |
| ENSG00000112210 | RAB23      | 31.423  | -0.560 | 1.944E-01 | 4.841E-01 | 34.582  | -0.369 | 3.519E-01 | 6.576E-01 |
| ENSG00000077721 | UBE2A      | 228.353 | 0.318  | 1.945E-01 | 4.843E-01 | 238.164 | 0.528  | 2.733E-02 | 1.740E-01 |
| ENSG00000213339 | QTRT1      | 64.087  | -0.514 | 1.950E-01 | 4.847E-01 | 70.320  | 0.550  | 1.494E-01 | 4.367E-01 |
| ENSG00000188483 | IER5L      | 59.051  | 0.469  | 1.970E-01 | 4.874E-01 | 52.227  | 1.033  | 7.286E-03 | 7.945E-02 |
| ENSG00000121716 | PILRB      | 30.927  | -0.554 | 1.978E-01 | 4.878E-01 | 29.110  | 0.122  | 7.654E-01 | 9.039E-01 |
| ENSG00000213398 | LCAT       | 45.224  | -0.546 | 1.982E-01 | 4.883E-01 | 54.079  | -0.106 | 7.886E-01 | 9.151E-01 |
| ENSG00000114648 | KLHL18     | 124.075 | 0.369  | 1.985E-01 | 4.886E-01 | 98.167  | 0.722  | 3.107E-02 | 1.880E-01 |
| ENSG00000167840 | ZNF232     | 48.779  | -0.517 | 1.986E-01 | 4.886E-01 | 81.233  | -0.360 | 2.742E-01 | 5.842E-01 |
| ENSG00000008282 | SYPL1      | 303.802 | 0.303  | 1.988E-01 | 4.887E-01 | 299.057 | 0.579  | 2.089E-02 | 1.519E-01 |
| ENSG00000263563 | AC138761.1 | 32.434  | -0.529 | 2.005E-01 | 4.906E-01 | 43.162  | 0.205  | 5.870E-01 | 8.142E-01 |
| ENSG00000031691 | CENPQ      | 131.574 | -0.503 | 2.009E-01 | 4.912E-01 | 158.838 | 0.041  | 8.734E-01 | 9.523E-01 |
| ENSG00000164327 | RICTOR     | 62.069  | 0.467  | 2.030E-01 | 4.932E-01 | 79.529  | 0.546  | 1.110E-01 | 3.724E-01 |
| ENSG00000189227 | C15orf61   | 369.447 | 0.307  | 2.032E-01 | 4.933E-01 | 216.771 | 0.602  | 1.679E-02 | 1.328E-01 |
| ENSG00000066379 | ZNRD1      | 300.867 | 0.303  | 2.055E-01 | 4.959E-01 | 215.202 | 0.695  | 1.789E-02 | 1.383E-01 |
| ENSG00000090975 | PITPNM2    | 71.637  | 0.439  | 2.056E-01 | 4.960E-01 | 71.784  | 0.516  | 1.342E-01 | 4.137E-01 |
| ENSG00000066427 | ATXN3      | 191.808 | 0.327  | 2.087E-01 | 5.000E-01 | 159.679 | 0.778  | 5.434E-03 | 6.731E-02 |
| ENSG00000161980 | POLR3K     | 277.716 | 0.295  | 2.097E-01 | 5.017E-01 | 255.384 | 0.606  | 9.546E-03 | 9.541E-02 |
| ENSG00000143190 | POU2F1     | 292.726 | 0.302  | 2.100E-01 | 5.017E-01 | 361.149 | 0.828  | 1.224E-03 | 2.534E-02 |
| ENSG00000112242 | E2F3       | 367.248 | 0.272  | 2.110E-01 | 5.028E-01 | 341.040 | 0.527  | 2.471E-02 | 1.666E-01 |
| ENSG00000133731 | IMPA1      | 107.011 | 0.416  | 2.114E-01 | 5.030E-01 | 109.687 | 0.789  | 8.707E-03 | 9.006E-02 |

|                 |            |          |        |           |           |          |        |           |           |
|-----------------|------------|----------|--------|-----------|-----------|----------|--------|-----------|-----------|
| ENSG00000171097 | KYAT1      | 43.258   | -0.544 | 2.125E-01 | 5.044E-01 | 52.856   | -0.271 | 4.594E-01 | 7.377E-01 |
| ENSG00000151239 | TWF1       | 59.795   | 0.461  | 2.126E-01 | 5.046E-01 | 76.978   | 0.760  | 4.009E-02 | 2.167E-01 |
| ENSG00000184056 | VPS33B     | 43.426   | -0.503 | 2.136E-01 | 5.059E-01 | 51.851   | 0.064  | 8.583E-01 | 9.465E-01 |
| ENSG00000107566 | ERLIN1     | 474.845  | 0.338  | 2.153E-01 | 5.085E-01 | 343.846  | 0.518  | 9.349E-02 | 3.392E-01 |
| ENSG00000138780 | GSTCD      | 49.228   | -0.505 | 2.169E-01 | 5.102E-01 | 50.541   | -0.490 | 2.054E-01 | 5.075E-01 |
| ENSG00000131876 | SNRPA1     | 123.886  | 0.408  | 2.202E-01 | 5.148E-01 | 115.292  | 0.781  | 8.905E-03 | 9.112E-02 |
| ENSG00000064726 | BTBD1      | 48.352   | 0.464  | 2.217E-01 | 5.164E-01 | 40.188   | 0.684  | 9.433E-02 | 3.406E-01 |
| ENSG00000143390 | RFX5       | 45.114   | -0.513 | 2.248E-01 | 5.196E-01 | 54.779   | -0.119 | 7.397E-01 | 8.922E-01 |
| ENSG00000089060 | SLC8B1     | 30.310   | -0.523 | 2.253E-01 | 5.200E-01 | 47.646   | -0.246 | 5.050E-01 | 7.642E-01 |
| ENSG00000144026 | ZNF514     | 33.349   | -0.512 | 2.259E-01 | 5.204E-01 | 59.684   | -0.465 | 2.398E-01 | 5.470E-01 |
| ENSG00000171617 | ENC1       | 612.379  | 0.254  | 2.280E-01 | 5.220E-01 | 579.198  | 0.659  | 7.837E-04 | 1.918E-02 |
| ENSG00000243989 | ACY1       | 32.661   | -0.513 | 2.285E-01 | 5.222E-01 | 42.381   | -0.189 | 6.158E-01 | 8.314E-01 |
| ENSG00000138802 | SEC24B     | 93.378   | 0.403  | 2.284E-01 | 5.222E-01 | 104.220  | 0.602  | 7.288E-02 | 2.959E-01 |
| ENSG00000109861 | CTSC       | 222.550  | 0.407  | 2.285E-01 | 5.222E-01 | 154.569  | 0.767  | 2.143E-02 | 1.536E-01 |
| ENSG00000108010 | GLRX3      | 416.471  | 0.271  | 2.301E-01 | 5.244E-01 | 392.653  | 0.538  | 2.320E-02 | 1.606E-01 |
| ENSG00000104312 | RIPK2      | 93.462   | 0.426  | 2.352E-01 | 5.307E-01 | 93.438   | 0.981  | 4.832E-03 | 6.275E-02 |
| ENSG00000114942 | EEF1B2     | 3907.280 | 0.181  | 2.363E-01 | 5.318E-01 | 3394.411 | 0.507  | 2.481E-03 | 3.980E-02 |
| ENSG00000178996 | SNX18      | 44.561   | 0.448  | 2.362E-01 | 5.318E-01 | 80.334   | 0.590  | 8.464E-02 | 3.215E-01 |
| ENSG00000151576 | QTRT2      | 175.059  | 0.333  | 2.365E-01 | 5.318E-01 | 172.155  | 0.520  | 6.976E-02 | 2.892E-01 |
| ENSG00000166886 | NAB2       | 61.897   | 0.429  | 2.377E-01 | 5.334E-01 | 58.600   | 0.528  | 1.567E-01 | 4.470E-01 |
| ENSG00000169902 | TPST1      | 51.292   | 0.448  | 2.379E-01 | 5.337E-01 | 60.801   | 0.600  | 1.050E-01 | 3.621E-01 |
| ENSG00000151304 | SRFBP1     | 156.514  | 0.330  | 2.387E-01 | 5.344E-01 | 176.806  | 0.634  | 3.685E-02 | 2.065E-01 |
| ENSG00000132522 | GPS2       | 96.627   | 0.357  | 2.394E-01 | 5.351E-01 | 132.919  | 0.730  | 1.600E-02 | 1.295E-01 |
| ENSG00000274605 | AL355338.1 | 66.163   | 0.462  | 2.405E-01 | 5.361E-01 | 73.277   | 0.622  | 6.248E-02 | 2.750E-01 |
| ENSG00000070423 | RNF126     | 1982.039 | 0.250  | 2.414E-01 | 5.369E-01 | 1688.254 | 0.689  | 2.083E-03 | 3.568E-02 |
| ENSG00000206562 | METTL6     | 36.067   | -0.513 | 2.417E-01 | 5.370E-01 | 37.191   | 0.252  | 5.059E-01 | 7.646E-01 |
| ENSG00000174365 | SNHG11     | 217.807  | 0.295  | 2.419E-01 | 5.370E-01 | 253.045  | 0.682  | 1.173E-02 | 1.074E-01 |

|                 |        |         |        |           |           |         |       |           |           |
|-----------------|--------|---------|--------|-----------|-----------|---------|-------|-----------|-----------|
| ENSG00000169607 | CKAP2L | 286.672 | 0.309  | 2.452E-01 | 5.403E-01 | 255.206 | 0.686 | 4.392E-03 | 5.907E-02 |
| ENSG00000119682 | AREL1  | 62.080  | -0.429 | 2.463E-01 | 5.411E-01 | 102.069 | 0.642 | 3.261E-02 | 1.931E-01 |
| ENSG00000091483 | FH     | 304.739 | 0.314  | 2.475E-01 | 5.427E-01 | 240.930 | 0.514 | 2.195E-01 | 5.248E-01 |
| ENSG00000169136 | ATF5   | 186.300 | 0.307  | 2.494E-01 | 5.432E-01 | 181.079 | 0.611 | 5.196E-02 | 2.487E-01 |
| ENSG00000196453 | ZNF777 | 95.837  | 0.399  | 2.505E-01 | 5.440E-01 | 91.009  | 0.650 | 4.648E-02 | 2.345E-01 |
| ENSG00000165006 | UBAP1  | 208.698 | 0.316  | 2.520E-01 | 5.456E-01 | 177.250 | 0.792 | 2.538E-03 | 4.058E-02 |
| ENSG00000102471 | NDFIP2 | 122.203 | 0.342  | 2.547E-01 | 5.483E-01 | 107.853 | 0.656 | 4.275E-02 | 2.237E-01 |
| ENSG00000131981 | LGALS3 | 75.282  | 0.395  | 2.547E-01 | 5.483E-01 | 71.046  | 0.583 | 8.165E-02 | 3.159E-01 |
| ENSG00000162616 | DNAJB4 | 62.413  | 0.424  | 2.555E-01 | 5.494E-01 | 46.017  | 0.879 | 3.417E-02 | 1.990E-01 |
| ENSG00000116701 | NCF2   | 37.432  | 0.426  | 2.573E-01 | 5.511E-01 | 49.715  | 1.372 | 3.524E-04 | 1.085E-02 |
| ENSG00000166855 | CLPX   | 192.398 | 0.308  | 2.577E-01 | 5.514E-01 | 179.672 | 0.596 | 3.420E-02 | 1.990E-01 |
| ENSG00000007372 | PAX6   | 30.584  | -0.483 | 2.592E-01 | 5.527E-01 | 32.854  | 0.652 | 1.096E-01 | 3.702E-01 |
| ENSG00000125846 | ZNF133 | 67.636  | 0.424  | 2.594E-01 | 5.530E-01 | 94.994  | 0.655 | 6.706E-02 | 2.844E-01 |
| ENSG00000092208 | GEMIN2 | 82.759  | 0.434  | 2.600E-01 | 5.534E-01 | 60.339  | 0.542 | 1.475E-01 | 4.342E-01 |
| ENSG00000168476 | REEP4  | 470.305 | 0.268  | 2.631E-01 | 5.563E-01 | 404.044 | 0.600 | 5.180E-02 | 2.484E-01 |
| ENSG00000149564 | ESAM   | 57.011  | 0.469  | 2.631E-01 | 5.563E-01 | 42.654  | 0.838 | 3.141E-02 | 1.891E-01 |
| ENSG00000272886 | DCP1A  | 225.132 | 0.297  | 2.650E-01 | 5.579E-01 | 161.511 | 0.608 | 3.608E-02 | 2.038E-01 |
| ENSG00000128487 | SPECC1 | 195.473 | 0.304  | 2.668E-01 | 5.600E-01 | 242.264 | 0.767 | 2.593E-03 | 4.103E-02 |
| ENSG00000188612 | SUMO2  | 159.931 | 0.301  | 2.680E-01 | 5.612E-01 | 180.898 | 0.510 | 5.157E-02 | 2.481E-01 |
| ENSG00000105063 | PPP6R1 | 39.633  | 0.451  | 2.684E-01 | 5.614E-01 | 37.357  | 0.511 | 2.120E-01 | 5.157E-01 |
| ENSG00000010017 | RANBP9 | 140.011 | 0.393  | 2.701E-01 | 5.628E-01 | 119.572 | 0.846 | 1.644E-02 | 1.313E-01 |
| ENSG00000043514 | TRIT1  | 83.983  | 0.384  | 2.711E-01 | 5.638E-01 | 81.045  | 0.708 | 4.663E-02 | 2.350E-01 |
| ENSG00000167771 | RCOR2  | 81.019  | 0.424  | 2.740E-01 | 5.669E-01 | 63.884  | 1.029 | 1.135E-02 | 1.050E-01 |
| ENSG00000074935 | TUBE1  | 46.418  | 0.422  | 2.778E-01 | 5.706E-01 | 46.888  | 1.019 | 7.580E-03 | 8.187E-02 |
| ENSG00000165156 | ZHX1   | 197.329 | 0.315  | 2.842E-01 | 5.776E-01 | 224.603 | 0.752 | 2.806E-03 | 4.333E-02 |
| ENSG00000234912 | SNHG20 | 65.635  | 0.401  | 2.882E-01 | 5.818E-01 | 67.090  | 0.698 | 3.662E-02 | 2.063E-01 |
| ENSG00000104221 | BRF2   | 53.096  | 0.428  | 2.886E-01 | 5.819E-01 | 53.504  | 0.827 | 2.778E-02 | 1.754E-01 |



|                 |            |         |        |           |           |         |       |           |           |
|-----------------|------------|---------|--------|-----------|-----------|---------|-------|-----------|-----------|
| ENSG00000113595 | TRIM23     | 63.445  | 0.382  | 2.897E-01 | 5.830E-01 | 99.497  | 0.909 | 6.687E-03 | 7.564E-02 |
| ENSG00000079332 | SAR1A      | 774.626 | 0.203  | 2.936E-01 | 5.872E-01 | 677.467 | 0.596 | 4.230E-03 | 5.763E-02 |
| ENSG00000198799 | LRIG2      | 38.292  | 0.409  | 3.004E-01 | 5.951E-01 | 39.102  | 0.554 | 1.758E-01 | 4.715E-01 |
| ENSG00000120526 | NUDCD1     | 104.878 | 0.346  | 3.039E-01 | 5.986E-01 | 91.256  | 0.508 | 9.202E-02 | 3.369E-01 |
| ENSG00000188177 | ZC3H6      | 35.636  | 0.435  | 3.057E-01 | 6.008E-01 | 55.283  | 0.744 | 3.845E-02 | 2.116E-01 |
| ENSG00000279457 | FO538757.1 | 60.526  | 0.400  | 3.073E-01 | 6.022E-01 | 61.996  | 0.595 | 9.067E-02 | 3.340E-01 |
| ENSG00000185262 | UBALD2     | 235.165 | 0.267  | 3.076E-01 | 6.024E-01 | 152.937 | 0.586 | 6.769E-02 | 2.853E-01 |
| ENSG00000138750 | NUP54      | 99.749  | 0.326  | 3.082E-01 | 6.031E-01 | 102.670 | 0.570 | 1.043E-01 | 3.614E-01 |
| ENSG00000205336 | ADGRG1     | 149.827 | 0.276  | 3.119E-01 | 6.055E-01 | 172.174 | 0.946 | 1.290E-03 | 2.589E-02 |
| ENSG00000196646 | ZNF136     | 39.681  | 0.402  | 3.134E-01 | 6.069E-01 | 34.023  | 0.928 | 2.699E-02 | 1.731E-01 |
| ENSG00000120913 | PDLIM2     | 296.898 | 0.243  | 3.144E-01 | 6.078E-01 | 288.380 | 0.573 | 6.445E-02 | 2.785E-01 |
| ENSG00000105732 | ZNF574     | 80.851  | 0.358  | 3.172E-01 | 6.107E-01 | 91.821  | 0.796 | 2.163E-02 | 1.544E-01 |
| ENSG00000187118 | CMC1       | 116.214 | 0.326  | 3.202E-01 | 6.124E-01 | 120.450 | 0.767 | 1.163E-02 | 1.068E-01 |
| ENSG00000176845 | METRNL     | 35.615  | 0.422  | 3.200E-01 | 6.124E-01 | 33.336  | 1.120 | 5.125E-03 | 6.495E-02 |
| ENSG00000233971 | RPS20P10   | 33.505  | 0.420  | 3.217E-01 | 6.135E-01 | 36.377  | 0.632 | 1.134E-01 | 3.767E-01 |
| ENSG00000183963 | SMTN       | 73.460  | 0.350  | 3.219E-01 | 6.135E-01 | 90.201  | 0.676 | 8.567E-02 | 3.243E-01 |
| ENSG00000175354 | PTPN2      | 255.926 | 0.224  | 3.241E-01 | 6.150E-01 | 196.033 | 0.627 | 2.792E-02 | 1.761E-01 |
| ENSG00000247844 | CCAT1      | 32.409  | 0.425  | 3.234E-01 | 6.150E-01 | 55.714  | 0.637 | 7.509E-02 | 3.015E-01 |
| ENSG00000210184 | MT-TS2     | 61.249  | -0.398 | 3.254E-01 | 6.161E-01 | 44.499  | 0.663 | NA        | NA        |
| ENSG00000105321 | CCDC9      | 57.263  | 0.391  | 3.259E-01 | 6.164E-01 | 42.003  | 0.566 | 1.492E-01 | 4.367E-01 |
| ENSG00000237550 | RPL9P9     | 98.299  | 0.425  | 3.264E-01 | 6.170E-01 | 70.977  | 0.760 | 4.747E-02 | 2.374E-01 |
| ENSG00000185269 | NOTUM      | 795.546 | 0.430  | 3.275E-01 | 6.170E-01 | 386.892 | 0.750 | 7.295E-02 | 2.959E-01 |
| ENSG00000184182 | UBE2F      | 279.488 | 0.256  | 3.312E-01 | 6.199E-01 | 296.051 | 0.612 | 1.397E-02 | 1.190E-01 |
| ENSG00000082068 | WDR70      | 128.590 | 0.287  | 3.344E-01 | 6.234E-01 | 133.969 | 0.597 | 5.191E-02 | 2.487E-01 |
| ENSG00000123136 | DDX39A     | 106.917 | 0.312  | 3.371E-01 | 6.264E-01 | 101.726 | 0.632 | 7.125E-02 | 2.922E-01 |
| ENSG00000006704 | GTF2IRD1   | 157.703 | 0.259  | 3.391E-01 | 6.278E-01 | 189.062 | 0.649 | 1.658E-02 | 1.319E-01 |
| ENSG00000117519 | CNN3       | 578.702 | 0.404  | 3.434E-01 | 6.317E-01 | 366.364 | 0.715 | 8.227E-03 | 8.689E-02 |

|                 |            |          |        |           |           |         |       |           |           |
|-----------------|------------|----------|--------|-----------|-----------|---------|-------|-----------|-----------|
| ENSG00000101216 | GMEB2      | 266.535  | 0.246  | 3.445E-01 | 6.329E-01 | 263.176 | 0.608 | 1.348E-02 | 1.169E-01 |
| ENSG00000198964 | SGMS1      | 87.323   | 0.310  | 3.466E-01 | 6.341E-01 | 63.737  | 0.854 | 1.047E-02 | 9.974E-02 |
| ENSG00000172493 | AFF1       | 94.016   | 0.339  | 3.500E-01 | 6.370E-01 | 76.123  | 0.514 | 1.317E-01 | 4.099E-01 |
| ENSG00000095397 | WHRN       | 39.813   | 0.358  | 3.521E-01 | 6.393E-01 | 35.757  | 0.679 | 8.939E-02 | 3.311E-01 |
| ENSG00000151532 | VTI1A      | 144.748  | 0.288  | 3.541E-01 | 6.412E-01 | 156.962 | 0.530 | 4.628E-02 | 2.340E-01 |
| ENSG00000172728 | FUT10      | 53.995   | 0.348  | 3.548E-01 | 6.413E-01 | 50.672  | 1.045 | 6.314E-03 | 7.293E-02 |
| ENSG00000135919 | SERPINE2   | 175.150  | 0.299  | 3.550E-01 | 6.416E-01 | 338.554 | 0.954 | 1.794E-05 | 1.142E-03 |
| ENSG00000095739 | BAMBI      | 81.818   | 0.307  | 3.565E-01 | 6.428E-01 | 100.382 | 0.979 | 5.078E-03 | 6.466E-02 |
| ENSG00000186432 | KPNA4      | 862.523  | 0.175  | 3.571E-01 | 6.431E-01 | 759.072 | 0.547 | 6.226E-03 | 7.256E-02 |
| ENSG00000071282 | LMCD1      | 65.067   | 0.320  | 3.582E-01 | 6.443E-01 | 74.965  | 0.549 | 9.221E-02 | 3.372E-01 |
| ENSG00000228288 | PCAT6      | 58.607   | -0.325 | 3.600E-01 | 6.460E-01 | 54.037  | 0.741 | 6.184E-02 | 2.734E-01 |
| ENSG00000049860 | HEXB       | 334.899  | 0.220  | 3.611E-01 | 6.474E-01 | 299.229 | 0.542 | 3.435E-02 | 1.994E-01 |
| ENSG00000156374 | PCGF6      | 50.330   | 0.350  | 3.630E-01 | 6.492E-01 | 31.981  | 0.839 | 3.831E-02 | 2.112E-01 |
| ENSG00000137393 | RNF144B    | 75.059   | 0.343  | 3.635E-01 | 6.494E-01 | 59.309  | 0.903 | 1.327E-02 | 1.155E-01 |
| ENSG00000164169 | PRMT9      | 29.001   | 0.391  | 3.636E-01 | 6.494E-01 | 33.904  | 0.630 | 1.163E-01 | 3.823E-01 |
| ENSG00000186481 | ANKRD20A5P | 17.815   | 0.397  | 3.648E-01 | 6.506E-01 | 47.151  | 0.597 | 1.120E-01 | 3.741E-01 |
| ENSG00000182117 | NOP10      | 1051.408 | 0.202  | 3.656E-01 | 6.508E-01 | 929.129 | 0.650 | 2.836E-03 | 4.365E-02 |
| ENSG00000132155 | RAF1       | 133.007  | 0.270  | 3.658E-01 | 6.508E-01 | 117.223 | 0.599 | 4.729E-02 | 2.368E-01 |
| ENSG00000130699 | TAF4       | 125.567  | 0.289  | 3.725E-01 | 6.576E-01 | 122.916 | 0.672 | 2.098E-02 | 1.522E-01 |
| ENSG00000051382 | PIK3CB     | 73.479   | 0.307  | 3.732E-01 | 6.582E-01 | 97.989  | 0.525 | 9.483E-02 | 3.420E-01 |
| ENSG00000105186 | ANKRD27    | 118.794  | 0.292  | 3.752E-01 | 6.597E-01 | 110.785 | 0.816 | 8.277E-03 | 8.712E-02 |
| ENSG00000156232 | WHAMM      | 143.710  | 0.292  | 3.803E-01 | 6.637E-01 | 194.070 | 0.556 | 2.538E-02 | 1.685E-01 |
| ENSG00000116213 | WRAP73     | 161.556  | 0.292  | 3.819E-01 | 6.649E-01 | 123.662 | 0.602 | 9.519E-02 | 3.426E-01 |
| ENSG00000157107 | FCHO2      | 59.608   | 0.314  | 3.820E-01 | 6.650E-01 | 52.231  | 1.035 | 5.680E-03 | 6.885E-02 |
| ENSG00000121210 | TMEM131L   | 54.194   | 0.343  | 3.887E-01 | 6.706E-01 | 78.694  | 0.953 | 5.522E-03 | 6.780E-02 |
| ENSG00000148925 | BTBD10     | 163.163  | 0.243  | 3.900E-01 | 6.719E-01 | 146.437 | 0.571 | 5.528E-02 | 2.576E-01 |
| ENSG00000153989 | NUS1       | 61.229   | 0.305  | 3.922E-01 | 6.742E-01 | 60.545  | 0.679 | 5.546E-02 | 2.579E-01 |

|                 |            |         |        |           |           |         |       |           |           |
|-----------------|------------|---------|--------|-----------|-----------|---------|-------|-----------|-----------|
| ENSG00000076864 | RAP1GAP    | 80.486  | -0.292 | 3.972E-01 | 6.786E-01 | 75.876  | 0.685 | 6.284E-02 | 2.750E-01 |
| ENSG00000164211 | STARD4     | 62.629  | 0.304  | 3.981E-01 | 6.794E-01 | 80.021  | 0.546 | 1.138E-01 | 3.778E-01 |
| ENSG00000116809 | ZBTB17     | 79.353  | 0.295  | 3.983E-01 | 6.795E-01 | 81.457  | 0.841 | 1.727E-02 | 1.350E-01 |
| ENSG00000144744 | UBA3       | 66.745  | -0.293 | 4.041E-01 | 6.837E-01 | 81.118  | 0.715 | 3.873E-02 | 2.124E-01 |
| ENSG00000225648 | SBDSP1     | 73.653  | 0.334  | 4.055E-01 | 6.847E-01 | 74.939  | 0.586 | 1.468E-01 | 4.329E-01 |
| ENSG00000199377 | RNU5F-1    | 31.188  | 0.347  | 4.076E-01 | 6.864E-01 | 63.662  | 1.031 | 9.374E-03 | 9.407E-02 |
| ENSG00000165282 | PIGO       | 48.135  | -0.337 | 4.112E-01 | 6.892E-01 | 36.041  | 0.525 | 1.986E-01 | 4.997E-01 |
| ENSG00000117650 | NEK2       | 179.725 | 0.240  | 4.120E-01 | 6.897E-01 | 174.757 | 0.660 | 2.498E-02 | 1.668E-01 |
| ENSG00000123908 | AGO2       | 199.653 | 0.229  | 4.160E-01 | 6.918E-01 | 163.822 | 1.025 | 3.608E-04 | 1.098E-02 |
| ENSG00000160685 | ZBTB7B     | 36.103  | 0.318  | 4.221E-01 | 6.974E-01 | 35.538  | 0.838 | 4.143E-02 | 2.203E-01 |
| ENSG00000101986 | ABCD1      | 48.574  | -0.301 | 4.238E-01 | 6.986E-01 | 40.017  | 0.721 | 6.715E-02 | 2.847E-01 |
| ENSG00000164164 | OTUD4      | 183.171 | 0.218  | 4.255E-01 | 6.990E-01 | 222.125 | 0.804 | 2.148E-03 | 3.620E-02 |
| ENSG00000149923 | PPP4C      | 203.138 | 0.343  | 4.261E-01 | 6.994E-01 | 108.348 | 0.830 | 2.647E-02 | 1.716E-01 |
| ENSG00000172932 | ANKRD13D   | 48.097  | -0.320 | 4.277E-01 | 7.002E-01 | 69.127  | 0.708 | 4.892E-02 | 2.403E-01 |
| ENSG00000253833 | AC022868.1 | 20.297  | 0.343  | 4.296E-01 | 7.020E-01 | 30.922  | 0.574 | 1.567E-01 | 4.470E-01 |
| ENSG00000122882 | ECD        | 181.660 | 0.201  | 4.308E-01 | 7.028E-01 | 181.523 | 0.655 | 2.096E-02 | 1.521E-01 |
| ENSG00000168944 | CEP120     | 103.969 | 0.237  | 4.372E-01 | 7.080E-01 | 122.554 | 0.508 | 8.362E-02 | 3.196E-01 |
| ENSG00000126215 | XRCC3      | 91.302  | -0.277 | 4.378E-01 | 7.084E-01 | 68.784  | 0.504 | 1.848E-01 | 4.839E-01 |
| ENSG00000075188 | NUP37      | 217.853 | 0.261  | 4.380E-01 | 7.085E-01 | 171.439 | 0.541 | 6.088E-02 | 2.719E-01 |
| ENSG00000106484 | MEST       | 144.826 | 0.252  | 4.394E-01 | 7.099E-01 | 109.565 | 0.504 | 1.799E-01 | 4.772E-01 |
| ENSG00000169826 | CSGALNACT2 | 40.131  | 0.294  | 4.393E-01 | 7.099E-01 | 56.992  | 0.959 | 1.026E-02 | 9.847E-02 |
| ENSG00000204469 | PRRC2A     | 117.777 | 0.244  | 4.424E-01 | 7.125E-01 | 99.034  | 0.574 | 7.089E-02 | 2.914E-01 |
| ENSG00000198382 | UVRAG      | 205.876 | 0.197  | 4.453E-01 | 7.154E-01 | 234.442 | 0.512 | 2.955E-02 | 1.823E-01 |
| ENSG00000038274 | MAT2B      | 204.904 | 0.249  | 4.465E-01 | 7.167E-01 | 136.733 | 0.561 | 5.478E-02 | 2.560E-01 |
| ENSG00000237238 | BMS1P10    | 24.876  | 0.334  | 4.476E-01 | 7.173E-01 | 42.681  | 1.096 | 7.579E-03 | 8.187E-02 |
| ENSG00000181722 | ZBTB20     | 92.751  | 0.255  | 4.485E-01 | 7.178E-01 | 153.617 | 0.525 | 6.373E-02 | 2.773E-01 |
| ENSG00000221968 | FADS3      | 120.052 | 0.243  | 4.494E-01 | 7.183E-01 | 101.761 | 0.606 | 8.306E-02 | 3.185E-01 |

|                 |           |          |        |           |           |          |       |           |           |
|-----------------|-----------|----------|--------|-----------|-----------|----------|-------|-----------|-----------|
| ENSG00000113716 | HMGXB3    | 86.267   | 0.239  | 4.570E-01 | 7.245E-01 | 92.810   | 0.943 | 6.210E-03 | 7.246E-02 |
| ENSG00000168014 | C2CD3     | 33.237   | 0.301  | 4.586E-01 | 7.250E-01 | 48.664   | 0.546 | 1.503E-01 | 4.377E-01 |
| ENSG00000146410 | MTFR2     | 68.103   | 0.250  | 4.618E-01 | 7.271E-01 | 71.757   | 0.512 | 1.281E-01 | 4.038E-01 |
| ENSG00000111859 | NEDD9     | 557.917  | 0.148  | 4.648E-01 | 7.290E-01 | 420.914  | 0.510 | 3.093E-02 | 1.875E-01 |
| ENSG00000189171 | S100A13   | 426.838  | 0.189  | 4.706E-01 | 7.327E-01 | 331.861  | 0.665 | 8.975E-03 | 9.125E-02 |
| ENSG00000115163 | CENPA     | 220.833  | 0.211  | 4.712E-01 | 7.332E-01 | 149.258  | 0.795 | 6.612E-03 | 7.511E-02 |
| ENSG00000106089 | STX1A     | 26.644   | 0.303  | 4.764E-01 | 7.371E-01 | 40.178   | 1.459 | 2.556E-04 | 8.846E-03 |
| ENSG00000100599 | RIN3      | 50.892   | 0.261  | 4.788E-01 | 7.379E-01 | 53.756   | 0.516 | 1.581E-01 | 4.484E-01 |
| ENSG00000123427 | EEF1AKMT3 | 41.752   | 0.274  | 4.788E-01 | 7.379E-01 | 34.034   | 0.727 | 7.406E-02 | 2.991E-01 |
| ENSG00000110218 | PANX1     | 84.986   | 0.245  | 4.805E-01 | 7.384E-01 | 83.036   | 0.794 | 2.776E-02 | 1.754E-01 |
| ENSG00000146909 | NOM1      | 335.036  | 0.155  | 4.812E-01 | 7.387E-01 | 317.848  | 0.830 | 1.077E-03 | 2.372E-02 |
| ENSG00000186073 | C15orf41  | 49.254   | 0.277  | 4.814E-01 | 7.387E-01 | 32.076   | 0.781 | 4.575E-02 | 2.321E-01 |
| ENSG00000152382 | TADA1     | 91.348   | 0.221  | 4.871E-01 | 7.422E-01 | 100.600  | 0.602 | 4.253E-02 | 2.229E-01 |
| ENSG00000164631 | ZNF12     | 86.118   | 0.235  | 4.883E-01 | 7.427E-01 | 134.215  | 0.552 | 8.317E-02 | 3.185E-01 |
| ENSG00000118046 | STK11     | 70.409   | -0.275 | 4.902E-01 | 7.436E-01 | 77.650   | 0.617 | 9.044E-02 | 3.336E-01 |
| ENSG00000127870 | RNF6      | 51.587   | -0.275 | 4.919E-01 | 7.446E-01 | 97.828   | 0.553 | 7.011E-02 | 2.898E-01 |
| ENSG00000213995 | NAXD      | 103.228  | 0.239  | 4.967E-01 | 7.465E-01 | 104.678  | 0.616 | 5.265E-02 | 2.509E-01 |
| ENSG00000119912 | IDE       | 136.571  | 0.201  | 4.980E-01 | 7.476E-01 | 186.045  | 0.549 | 4.004E-02 | 2.167E-01 |
| ENSG00000137767 | SQOR      | 137.395  | -0.199 | 5.008E-01 | 7.492E-01 | 105.090  | 0.601 | 6.475E-02 | 2.787E-01 |
| ENSG00000149313 | AASDHPPT  | 230.589  | 0.161  | 5.013E-01 | 7.495E-01 | 243.311  | 0.539 | 2.906E-02 | 1.811E-01 |
| ENSG00000144182 | LIPT1     | 21.684   | 0.292  | 5.038E-01 | 7.513E-01 | 35.098   | 0.569 | 1.412E-01 | 4.250E-01 |
| ENSG00000102393 | GLA       | 60.391   | -0.252 | 5.041E-01 | 7.514E-01 | 60.533   | 0.755 | 3.760E-02 | 2.087E-01 |
| ENSG00000153044 | CENPH     | 143.136  | 0.186  | 5.095E-01 | 7.560E-01 | 135.978  | 0.661 | 2.705E-02 | 1.731E-01 |
| ENSG00000175711 | B3GNTL1   | 35.075   | -0.262 | 5.105E-01 | 7.563E-01 | 44.620   | 0.515 | 1.805E-01 | 4.780E-01 |
| ENSG00000134569 | LRP4      | 60.761   | -0.251 | 5.121E-01 | 7.572E-01 | 64.302   | 0.500 | 1.706E-01 | 4.655E-01 |
| ENSG00000108518 | PFN1      | 2710.860 | 0.254  | 5.159E-01 | 7.600E-01 | 2257.574 | 0.545 | 2.266E-03 | 3.770E-02 |
| ENSG00000131507 | NDFIP1    | 250.226  | 0.162  | 5.171E-01 | 7.611E-01 | 277.959  | 0.542 | 3.677E-02 | 2.063E-01 |

|                 |            |         |        |           |           |         |       |           |           |
|-----------------|------------|---------|--------|-----------|-----------|---------|-------|-----------|-----------|
| ENSG00000142544 | CTU1       | 37.187  | 0.257  | 5.415E-01 | 7.795E-01 | 32.880  | 0.520 | 2.068E-01 | 5.094E-01 |
| ENSG00000189190 | ZNF600     | 58.388  | 0.234  | 5.435E-01 | 7.806E-01 | 53.022  | 0.554 | 1.445E-01 | 4.299E-01 |
| ENSG00000247498 | GPRC5D-AS1 | 41.901  | -0.239 | 5.439E-01 | 7.808E-01 | 49.868  | 0.619 | 1.056E-01 | 3.631E-01 |
| ENSG00000075131 | TIPIN      | 46.363  | 0.263  | 5.455E-01 | 7.816E-01 | 58.533  | 0.519 | 1.542E-01 | 4.423E-01 |
| ENSG00000169299 | PGM2       | 83.588  | 0.200  | 5.465E-01 | 7.820E-01 | 86.961  | 0.672 | 4.933E-02 | 2.415E-01 |
| ENSG00000027001 | MIPEP      | 104.376 | 0.195  | 5.546E-01 | 7.884E-01 | 75.002  | 0.877 | 1.193E-02 | 1.087E-01 |
| ENSG00000168488 | ATXN2L     | 354.734 | 0.257  | 5.571E-01 | 7.894E-01 | 272.147 | 0.670 | 3.056E-02 | 1.865E-01 |
| ENSG00000231312 | AC007388.1 | 109.719 | 0.185  | 5.576E-01 | 7.895E-01 | 100.720 | 0.698 | 3.236E-02 | 1.922E-01 |
| ENSG00000158079 | PTPDC1     | 37.897  | 0.235  | 5.605E-01 | 7.909E-01 | 79.846  | 0.597 | 8.596E-02 | 3.243E-01 |
| ENSG00000147789 | ZNF7       | 38.124  | 0.236  | 5.591E-01 | 7.909E-01 | 58.918  | 0.693 | 5.568E-02 | 2.584E-01 |
| ENSG00000167967 | E4F1       | 55.668  | 0.215  | 5.655E-01 | 7.940E-01 | 64.393  | 0.639 | 9.218E-02 | 3.372E-01 |
| ENSG00000136940 | PDCL       | 132.185 | 0.183  | 5.671E-01 | 7.948E-01 | 124.611 | 0.832 | 6.908E-03 | 7.739E-02 |
| ENSG00000180953 | ST20       | 24.370  | -0.245 | 5.686E-01 | 7.958E-01 | 32.939  | 0.607 | 1.228E-01 | 3.936E-01 |
| ENSG00000146574 | CCZ1B      | 74.126  | 0.193  | 5.690E-01 | 7.959E-01 | 81.948  | 0.625 | 8.437E-02 | 3.212E-01 |
| ENSG00000180758 | GPR157     | 144.821 | -0.156 | 5.700E-01 | 7.968E-01 | 134.866 | 0.619 | 3.191E-02 | 1.908E-01 |
| ENSG00000172345 | STARD5     | 32.413  | -0.230 | 5.738E-01 | 7.976E-01 | 33.991  | 0.869 | 3.196E-02 | 1.909E-01 |
| ENSG00000141198 | TOM1L1     | 91.250  | 0.182  | 5.796E-01 | 8.018E-01 | 128.235 | 0.549 | 6.881E-02 | 2.873E-01 |
| ENSG00000106537 | TSPAN13    | 38.712  | 0.227  | 5.793E-01 | 8.018E-01 | 30.436  | 0.571 | 1.628E-01 | 4.536E-01 |
| ENSG00000101452 | DHX35      | 66.015  | -0.203 | 5.858E-01 | 8.063E-01 | 85.923  | 0.550 | 9.385E-02 | 3.399E-01 |
| ENSG00000163866 | SMIM12     | 175.249 | 0.145  | 5.901E-01 | 8.090E-01 | 179.419 | 0.596 | 2.172E-02 | 1.544E-01 |
| ENSG00000151247 | EIF4E      | 258.374 | -0.128 | 5.957E-01 | 8.118E-01 | 334.894 | 0.750 | 5.007E-03 | 6.384E-02 |
| ENSG00000223802 | CERS1      | 38.618  | 0.202  | 6.165E-01 | 8.229E-01 | 32.207  | 0.674 | 8.768E-02 | 3.282E-01 |
| ENSG00000178202 | KDELC2     | 78.841  | 0.174  | 6.225E-01 | 8.271E-01 | 73.308  | 0.587 | 8.420E-02 | 3.209E-01 |
| ENSG00000104859 | CLASRP     | 200.957 | 0.150  | 6.242E-01 | 8.284E-01 | 172.508 | 0.757 | 3.331E-02 | 1.958E-01 |
| ENSG00000273611 | ZNHIT3     | 258.410 | 0.140  | 6.266E-01 | 8.300E-01 | 225.368 | 0.810 | 2.356E-03 | 3.851E-02 |
| ENSG00000137312 | FLOT1      | 720.533 | -0.097 | 6.274E-01 | 8.303E-01 | 718.847 | 0.691 | 1.264E-02 | 1.129E-01 |
| ENSG00000145041 | DCAF1      | 165.877 | 0.173  | 6.296E-01 | 8.315E-01 | 116.706 | 0.662 | 5.970E-02 | 2.691E-01 |

|                 |            |         |        |           |           |         |       |           |           |
|-----------------|------------|---------|--------|-----------|-----------|---------|-------|-----------|-----------|
| ENSG00000237190 | CDKN2AIPNL | 106.287 | 0.150  | 6.302E-01 | 8.316E-01 | 114.459 | 0.543 | 1.040E-01 | 3.609E-01 |
| ENSG00000151748 | SAV1       | 105.825 | -0.148 | 6.334E-01 | 8.337E-01 | 115.518 | 0.527 | 1.075E-01 | 3.664E-01 |
| ENSG00000159658 | EFCAB14    | 236.653 | 0.130  | 6.472E-01 | 8.419E-01 | 172.066 | 0.845 | 1.707E-03 | 3.100E-02 |
| ENSG00000123094 | RASSF8     | 20.012  | 0.198  | 6.502E-01 | 8.437E-01 | 31.865  | 0.796 | 5.777E-02 | 2.634E-01 |
| ENSG00000168538 | TRAPPC11   | 67.516  | 0.173  | 6.520E-01 | 8.447E-01 | 80.975  | 0.546 | 8.253E-02 | 3.178E-01 |
| ENSG00000196636 | SDHAF3     | 61.600  | 0.188  | 6.526E-01 | 8.452E-01 | 48.586  | 0.644 | 7.369E-02 | 2.983E-01 |
| ENSG00000138050 | THUMPD2    | 96.098  | -0.140 | 6.587E-01 | 8.465E-01 | 74.064  | 0.584 | 1.211E-01 | 3.907E-01 |
| ENSG00000165506 | DNAAF2     | 55.253  | -0.170 | 6.611E-01 | 8.479E-01 | 64.944  | 0.967 | 8.161E-03 | 8.652E-02 |
| ENSG00000010404 | IDS        | 42.472  | -0.184 | 6.633E-01 | 8.489E-01 | 72.480  | 0.742 | 3.037E-02 | 1.856E-01 |
| ENSG00000147316 | MCPH1      | 104.229 | 0.146  | 6.645E-01 | 8.496E-01 | 86.081  | 0.627 | 5.750E-02 | 2.629E-01 |
| ENSG00000118197 | DDX59      | 56.460  | 0.159  | 6.645E-01 | 8.496E-01 | 73.099  | 0.677 | 5.405E-02 | 2.540E-01 |
| ENSG00000134996 | OSTF1      | 78.871  | 0.163  | 6.703E-01 | 8.528E-01 | 54.782  | 0.528 | 1.759E-01 | 4.715E-01 |
| ENSG00000105290 | APLP1      | 33.463  | 0.177  | 6.710E-01 | 8.528E-01 | 37.346  | 0.634 | 1.093E-01 | 3.700E-01 |
| ENSG00000164758 | MED30      | 48.700  | 0.166  | 6.715E-01 | 8.530E-01 | 36.301  | 0.987 | 1.492E-02 | 1.238E-01 |
| ENSG00000178971 | CTC1       | 46.878  | 0.174  | 6.716E-01 | 8.530E-01 | 65.264  | 0.509 | 1.638E-01 | 4.550E-01 |
| ENSG00000177888 | ZBTB41     | 35.505  | 0.171  | 6.717E-01 | 8.531E-01 | 64.127  | 0.632 | 6.385E-02 | 2.776E-01 |
| ENSG00000157538 | VPS26C     | 96.952  | 0.139  | 6.757E-01 | 8.550E-01 | 81.494  | 0.545 | 9.859E-02 | 3.497E-01 |
| ENSG00000124140 | SLC12A5    | 56.882  | 0.149  | 6.761E-01 | 8.550E-01 | 62.574  | 0.650 | 1.004E-01 | 3.544E-01 |
| ENSG00000153551 | CMTM7      | 373.709 | 0.089  | 6.810E-01 | 8.587E-01 | 401.307 | 0.591 | 2.010E-02 | 1.487E-01 |
| ENSG00000215421 | ZNF407     | 48.914  | 0.169  | 6.850E-01 | 8.607E-01 | 55.193  | 0.546 | 1.205E-01 | 3.905E-01 |
| ENSG00000198901 | PRC1       | 786.373 | 0.080  | 6.959E-01 | 8.682E-01 | 699.665 | 0.571 | 1.304E-02 | 1.146E-01 |
| ENSG00000180488 | MIGA1      | 45.490  | -0.160 | 6.969E-01 | 8.688E-01 | 71.476  | 0.693 | 5.903E-02 | 2.669E-01 |
| ENSG00000154889 | MPPE1      | 43.474  | -0.156 | 6.978E-01 | 8.692E-01 | 39.450  | 0.519 | 1.974E-01 | 4.986E-01 |
| ENSG00000143919 | CAMKMT     | 79.439  | 0.125  | 7.020E-01 | 8.714E-01 | 61.349  | 0.626 | 1.034E-01 | 3.602E-01 |
| ENSG00000157214 | STEAP2     | 74.377  | -0.130 | 7.052E-01 | 8.723E-01 | 73.645  | 0.535 | 1.057E-01 | 3.631E-01 |
| ENSG00000084636 | COL16A1    | 44.325  | 0.159  | 7.076E-01 | 8.742E-01 | 51.394  | 0.639 | 1.023E-01 | 3.585E-01 |
| ENSG00000142528 | ZNF473     | 82.809  | 0.122  | 7.090E-01 | 8.753E-01 | 73.977  | 0.602 | 7.397E-02 | 2.990E-01 |

|                 |            |         |        |           |           |         |       |           |           |
|-----------------|------------|---------|--------|-----------|-----------|---------|-------|-----------|-----------|
| ENSG00000105926 | MPP6       | 122.500 | 0.111  | 7.100E-01 | 8.759E-01 | 137.652 | 0.569 | 5.580E-02 | 2.585E-01 |
| ENSG00000141642 | ELAC1      | 26.903  | -0.154 | 7.179E-01 | 8.809E-01 | 38.352  | 0.683 | 8.600E-02 | 3.243E-01 |
| ENSG00000175376 | EIF1AD     | 121.500 | 0.125  | 7.240E-01 | 8.846E-01 | 86.607  | 0.623 | 7.243E-02 | 2.948E-01 |
| ENSG00000188002 | AC026412.1 | 107.294 | -0.107 | 7.273E-01 | 8.862E-01 | 140.982 | 0.575 | 6.269E-02 | 2.750E-01 |
| ENSG00000167470 | MIDN       | 877.243 | 0.067  | 7.276E-01 | 8.862E-01 | 764.157 | 0.643 | 1.134E-02 | 1.050E-01 |
| ENSG00000147119 | CHST7      | 25.095  | 0.151  | 7.302E-01 | 8.876E-01 | 30.364  | 0.775 | 5.193E-02 | 2.487E-01 |
| ENSG00000123728 | RAP2C      | 93.172  | 0.118  | 7.371E-01 | 8.909E-01 | 72.390  | 0.510 | 1.355E-01 | 4.159E-01 |
| ENSG00000137575 | SDCBP      | 423.814 | 0.141  | 7.387E-01 | 8.919E-01 | 338.513 | 0.693 | 2.667E-02 | 1.721E-01 |
| ENSG00000105329 | TGFB1      | 29.749  | 0.137  | 7.448E-01 | 8.947E-01 | 42.760  | 0.525 | 1.673E-01 | 4.598E-01 |
| ENSG00000132581 | SDF2       | 137.345 | -0.102 | 7.462E-01 | 8.953E-01 | 146.178 | 0.567 | 6.098E-02 | 2.721E-01 |
| ENSG00000163933 | RFT1       | 222.203 | 0.095  | 7.513E-01 | 8.979E-01 | 171.526 | 0.504 | 7.612E-02 | 3.039E-01 |
| ENSG00000173540 | GMPPB      | 71.832  | 0.126  | 7.512E-01 | 8.979E-01 | 63.179  | 0.525 | 1.384E-01 | 4.202E-01 |
| ENSG00000159433 | STARD9     | 45.044  | -0.122 | 7.519E-01 | 8.980E-01 | 69.643  | 0.558 | 1.094E-01 | 3.701E-01 |
| ENSG00000269578 | AC008764.7 | 22.003  | 0.135  | 7.555E-01 | 8.997E-01 | 52.202  | 1.295 | 1.267E-03 | 2.577E-02 |
| ENSG00000164105 | SAP30      | 93.775  | -0.100 | 7.568E-01 | 9.002E-01 | 98.263  | 0.691 | 2.639E-02 | 1.714E-01 |
| ENSG00000183605 | SFXN4      | 428.524 | 0.072  | 7.580E-01 | 9.006E-01 | 385.896 | 0.663 | 5.644E-03 | 6.865E-02 |
| ENSG00000152332 | UHMK1      | 175.031 | 0.083  | 7.587E-01 | 9.009E-01 | 182.360 | 0.587 | 2.275E-02 | 1.588E-01 |
| ENSG00000012171 | SEMA3B     | 510.221 | 0.072  | 7.634E-01 | 9.042E-01 | 418.599 | 0.566 | 8.806E-03 | 9.042E-02 |
| ENSG00000088179 | PTPN4      | 80.165  | 0.101  | 7.647E-01 | 9.046E-01 | 78.349  | 0.579 | 7.295E-02 | 2.959E-01 |
| ENSG00000118242 | MREG       | 33.361  | 0.121  | 7.678E-01 | 9.058E-01 | 57.391  | 0.740 | 3.359E-02 | 1.964E-01 |
| ENSG00000248909 | HMGB1P21   | 36.987  | 0.121  | 7.709E-01 | 9.078E-01 | 46.962  | 0.839 | 2.653E-02 | 1.717E-01 |
| ENSG00000163874 | ZC3H12A    | 102.218 | 0.092  | 7.722E-01 | 9.081E-01 | 98.836  | 1.045 | 7.756E-04 | 1.905E-02 |
| ENSG00000154059 | IMPACT     | 58.929  | 0.104  | 7.741E-01 | 9.094E-01 | 68.052  | 0.718 | 2.963E-02 | 1.825E-01 |
| ENSG00000156858 | PRR14      | 121.685 | -0.085 | 7.793E-01 | 9.117E-01 | 105.334 | 0.795 | 1.781E-02 | 1.380E-01 |
| ENSG00000040199 | PHLPP2     | 28.623  | 0.115  | 7.859E-01 | 9.151E-01 | 38.828  | 0.605 | 1.158E-01 | 3.816E-01 |
| ENSG00000146426 | TIAM2      | 37.681  | 0.108  | 7.875E-01 | 9.160E-01 | 62.356  | 0.532 | 1.229E-01 | 3.936E-01 |
| ENSG00000172954 | LCLAT1     | 84.194  | 0.091  | 7.934E-01 | 9.182E-01 | 106.670 | 0.759 | 1.436E-02 | 1.209E-01 |

|                 |            |         |        |           |           |         |       |           |           |
|-----------------|------------|---------|--------|-----------|-----------|---------|-------|-----------|-----------|
| ENSG00000165689 | SDCCAG3    | 450.953 | 0.069  | 7.985E-01 | 9.197E-01 | 391.143 | 0.545 | 1.013E-02 | 9.810E-02 |
| ENSG00000171723 | GPHN       | 68.993  | 0.090  | 8.008E-01 | 9.211E-01 | 85.877  | 0.621 | 5.689E-02 | 2.614E-01 |
| ENSG00000002919 | SNX11      | 89.131  | 0.087  | 8.028E-01 | 9.220E-01 | 81.962  | 0.716 | 2.153E-02 | 1.539E-01 |
| ENSG00000026103 | FAS        | 36.943  | 0.101  | 8.032E-01 | 9.220E-01 | 51.691  | 1.009 | 8.968E-03 | 9.125E-02 |
| ENSG00000184669 | OR7E14P    | 66.584  | 0.086  | 8.092E-01 | 9.245E-01 | 78.800  | 0.695 | 3.476E-02 | 2.003E-01 |
| ENSG00000184162 | NR2C2AP    | 153.987 | 0.069  | 8.108E-01 | 9.252E-01 | 119.713 | 0.609 | 3.265E-02 | 1.931E-01 |
| ENSG00000011198 | ABHD5      | 45.542  | 0.086  | 8.189E-01 | 9.301E-01 | 35.743  | 0.639 | 1.094E-01 | 3.701E-01 |
| ENSG00000112578 | BYSL       | 288.423 | 0.050  | 8.258E-01 | 9.331E-01 | 273.564 | 0.537 | 1.597E-02 | 1.294E-01 |
| ENSG00000088298 | EDEM2      | 153.368 | 0.069  | 8.286E-01 | 9.336E-01 | 118.625 | 0.582 | 6.138E-02 | 2.727E-01 |
| ENSG00000213598 | AL049873.1 | 33.043  | 0.080  | 8.296E-01 | 9.339E-01 | 44.653  | 0.520 | 1.820E-01 | 4.805E-01 |
| ENSG00000231940 | RPS7P3     | 45.094  | -0.079 | 8.337E-01 | 9.349E-01 | 34.667  | 0.702 | 7.721E-02 | 3.057E-01 |
| ENSG00000198855 | FICD       | 46.040  | 0.082  | 8.380E-01 | 9.372E-01 | 53.439  | 0.594 | 9.975E-02 | 3.526E-01 |
| ENSG00000197122 | SRC        | 141.221 | -0.061 | 8.438E-01 | 9.394E-01 | 115.682 | 0.583 | 7.774E-02 | 3.071E-01 |
| ENSG00000134056 | MRPS36     | 237.386 | -0.053 | 8.475E-01 | 9.401E-01 | 215.932 | 0.587 | 5.810E-02 | 2.643E-01 |
| ENSG00000110104 | CCDC86     | 536.246 | 0.047  | 8.553E-01 | 9.438E-01 | 440.106 | 0.879 | 1.549E-04 | 6.120E-03 |
| ENSG00000143537 | ADAM15     | 249.869 | -0.047 | 8.568E-01 | 9.443E-01 | 275.142 | 0.642 | 4.765E-02 | 2.375E-01 |
| ENSG00000171492 | LRRC8D     | 100.448 | 0.059  | 8.569E-01 | 9.443E-01 | 134.409 | 0.543 | 6.983E-02 | 2.894E-01 |
| ENSG00000214367 | HAUS3      | 47.046  | -0.068 | 8.577E-01 | 9.445E-01 | 59.460  | 0.920 | 1.440E-02 | 1.209E-01 |
| ENSG00000179588 | ZFPM1      | 41.436  | 0.072  | 8.609E-01 | 9.455E-01 | 45.127  | 0.529 | 1.607E-01 | 4.510E-01 |
| ENSG00000170634 | ACYP2      | 29.501  | 0.073  | 8.631E-01 | 9.462E-01 | 46.545  | 0.518 | 1.876E-01 | 4.870E-01 |
| ENSG00000135127 | BICDL1     | 18.278  | -0.072 | 8.679E-01 | 9.481E-01 | 35.827  | 1.069 | 9.278E-03 | 9.337E-02 |
| ENSG00000141391 | PRELID3A   | 29.736  | 0.062  | 8.785E-01 | 9.527E-01 | 46.128  | 0.521 | 1.715E-01 | 4.668E-01 |
| ENSG00000104219 | ZDHHC2     | 38.936  | 0.063  | 8.827E-01 | 9.543E-01 | 50.882  | 0.736 | 4.998E-02 | 2.432E-01 |
| ENSG00000186577 | SMIM29     | 165.444 | 0.043  | 8.869E-01 | 9.564E-01 | 172.762 | 0.614 | 5.124E-02 | 2.471E-01 |
| ENSG00000244687 | UBE2V1     | 43.253  | -0.057 | 8.876E-01 | 9.567E-01 | 40.784  | 0.944 | 1.611E-02 | 1.300E-01 |
| ENSG00000131759 | RARA       | 86.413  | 0.052  | 8.899E-01 | 9.577E-01 | 85.927  | 0.570 | 1.328E-01 | 4.114E-01 |
| ENSG00000145979 | TBC1D7     | 146.765 | -0.041 | 8.926E-01 | 9.582E-01 | 79.404  | 0.500 | 1.379E-01 | 4.196E-01 |



|                 |            |          |        |           |           |          |       |           |           |
|-----------------|------------|----------|--------|-----------|-----------|----------|-------|-----------|-----------|
| ENSG00000186908 | ZDHHC17    | 68.026   | -0.045 | 8.980E-01 | 9.608E-01 | 71.696   | 0.755 | 2.616E-02 | 1.713E-01 |
| ENSG00000234147 | AL035446.1 | 89.001   | 0.042  | 9.032E-01 | 9.637E-01 | 74.556   | 0.704 | 4.494E-02 | 2.300E-01 |
| ENSG00000139793 | MBNL2      | 191.789  | -0.032 | 9.037E-01 | 9.640E-01 | 158.938  | 0.568 | 4.856E-02 | 2.394E-01 |
| ENSG00000121350 | PYROXD1    | 28.110   | 0.051  | 9.066E-01 | 9.656E-01 | 36.573   | 0.602 | 1.200E-01 | 3.900E-01 |
| ENSG00000198918 | RPL39      | 1816.994 | 0.044  | 9.076E-01 | 9.658E-01 | 1530.161 | 0.510 | 2.150E-01 | 5.197E-01 |
| ENSG00000198176 | TFDP1      | 1229.936 | 0.027  | 9.079E-01 | 9.659E-01 | 1096.923 | 0.624 | 1.096E-03 | 2.389E-02 |
| ENSG00000072401 | UBE2D1     | 99.887   | -0.034 | 9.092E-01 | 9.665E-01 | 107.278  | 0.503 | 1.163E-01 | 3.823E-01 |
| ENSG00000130772 | MED18      | 77.111   | 0.037  | 9.178E-01 | 9.698E-01 | 79.055   | 0.543 | 9.835E-02 | 3.493E-01 |
| ENSG00000162676 | GFI1       | 49.193   | -0.040 | 9.223E-01 | 9.719E-01 | 44.738   | 0.652 | 1.012E-01 | 3.558E-01 |
| ENSG00000262251 | AC087388.1 | 28.553   | 0.040  | 9.257E-01 | 9.737E-01 | 41.590   | 0.501 | 1.882E-01 | 4.872E-01 |
| ENSG00000131941 | RHPN2      | 44.840   | -0.038 | 9.260E-01 | 9.739E-01 | 56.672   | 0.732 | 4.173E-02 | 2.207E-01 |
| ENSG00000125485 | DDX31      | 60.818   | 0.032  | 9.321E-01 | 9.761E-01 | 78.170   | 0.759 | 2.712E-02 | 1.732E-01 |
| ENSG00000115421 | PAPOLG     | 58.904   | -0.032 | 9.338E-01 | 9.765E-01 | 42.575   | 0.592 | 1.155E-01 | 3.811E-01 |
| ENSG00000166860 | ZBTB39     | 69.744   | -0.029 | 9.337E-01 | 9.765E-01 | 85.158   | 0.630 | 4.156E-02 | 2.205E-01 |
| ENSG00000101391 | CDK5RAP1   | 263.668  | -0.016 | 9.460E-01 | 9.815E-01 | 272.129  | 0.580 | 1.326E-02 | 1.155E-01 |
| ENSG00000175104 | TRAF6      | 39.270   | 0.025  | 9.486E-01 | 9.826E-01 | 47.324   | 0.581 | 1.285E-01 | 4.041E-01 |
| ENSG00000108515 | ENO3       | 149.566  | 0.020  | 9.495E-01 | 9.828E-01 | 162.349  | 0.516 | 5.635E-02 | 2.600E-01 |
| ENSG00000203883 | SOX18      | 72.247   | -0.022 | 9.565E-01 | 9.855E-01 | 34.199   | 0.589 | 1.575E-01 | 4.479E-01 |
| ENSG00000011485 | PPP5C      | 126.352  | -0.016 | 9.619E-01 | 9.877E-01 | 113.333  | 0.667 | 4.960E-02 | 2.419E-01 |
| ENSG00000050820 | BCAR1      | 272.248  | -0.010 | 9.692E-01 | 9.893E-01 | 301.028  | 0.520 | 1.960E-02 | 1.472E-01 |
| ENSG00000227036 | LINC00511  | 124.047  | 0.013  | 9.677E-01 | 9.893E-01 | 165.818  | 0.605 | 1.924E-02 | 1.452E-01 |
| ENSG00000132603 | NIP7       | 236.125  | -0.009 | 9.706E-01 | 9.894E-01 | 212.080  | 0.528 | 4.239E-02 | 2.227E-01 |
| ENSG00000188215 | DCUN1D3    | 69.364   | -0.012 | 9.726E-01 | 9.900E-01 | 70.160   | 0.540 | 1.324E-01 | 4.108E-01 |
| ENSG00000143753 | DEGS1      | 46.536   | 0.012  | 9.748E-01 | 9.906E-01 | 59.772   | 0.739 | 3.493E-02 | 2.006E-01 |
| ENSG00000173762 | CD7        | 137.734  | -0.005 | 9.898E-01 | 9.968E-01 | 144.538  | 0.641 | 7.780E-02 | 3.071E-01 |
| ENSG00000167543 | TP53I13    | 164.136  | -0.004 | 9.908E-01 | 9.971E-01 | 151.675  | 0.610 | 4.383E-02 | 2.276E-01 |
| ENSG00000042429 | MED17      | 95.194   | 0.003  | 9.935E-01 | 9.977E-01 | 101.821  | 0.588 | 4.969E-02 | 2.421E-01 |

|                 |            |         |        |           |           |         |        |           |           |
|-----------------|------------|---------|--------|-----------|-----------|---------|--------|-----------|-----------|
| ENSG00000196437 | ZNF569     | 33.920  | -0.002 | 9.962E-01 | 9.985E-01 | 35.427  | 0.558  | 1.645E-01 | 4.567E-01 |
| ENSG00000110429 | FBXO3      | 117.749 | 0.001  | 9.983E-01 | 9.995E-01 | 93.532  | 0.521  | 8.969E-02 | 3.317E-01 |
| ENSG00000066583 | ISOC1      | 272.384 | 0.000  | 9.995E-01 | 1.000E+00 | 172.937 | 1.031  | 2.931E-03 | 4.474E-02 |
| ENSG00000178445 | GLDC       | 103.256 | -0.711 | NA        | NA        | 76.467  | -0.054 | 8.817E-01 | 9.547E-01 |
| ENSG00000280138 | AC027290.2 | 12.588  | 0.482  | 2.545E-01 | NA        | 36.351  | 0.640  | 1.182E-01 | 3.856E-01 |
| ENSG00000119689 | DLST       | 7.838   | 0.543  | 1.881E-01 | NA        | 30.795  | 1.017  | 1.255E-02 | 1.123E-01 |

(Direct) predicted  
targets

**Table S11.** STRING clusters analysis of targets down-regulated by miR-222-5p.

| <b>Cluster number</b> | <b>Protein name</b> |
|-----------------------|---------------------|
| 1                     | ACSM2B              |
| 1                     | ADNP2               |
| 1                     | ADRBK2              |
| 1                     | AHSA2               |
| 1                     | ANKRD13D            |
| 1                     | ANKRD27             |
| 1                     | ARHGEF25            |
| 1                     | ARMC6               |
| 1                     | ASTN2               |
| 1                     | ATXN2L              |
| 1                     | ATXN7L3B            |
| 1                     | BCORL1              |
| 1                     | C10orf2             |
| 1                     | C10orf76            |
| 1                     | C11orf30            |
| 1                     | C15orf61            |
| 1                     | C19orf25            |
| 1                     | C19orf54            |
| 1                     | C19orf66            |
| 1                     | C4orf3              |
| 1                     | C6orf120            |
| 1                     | CAAP1               |
| 1                     | CACFD1              |
| 1                     | CARD9               |
| 1                     | CCDC57              |
| 1                     | CCM2                |
| 1                     | CCZ1B               |
| 1                     | CDKL5               |
| 1                     | CENPBD1             |
| 1                     | CEP131              |
| 1                     | CGGBP1              |
| 1                     | CNBP                |
| 1                     | CNOT2               |
| 1                     | CNPY4               |
| 1                     | CUEDC2              |
| 1                     | DCP1A               |
| 1                     | DDX1                |
| 1                     | DDX23               |
| 1                     | DNAJB4              |
| 1                     | DNAJC4              |

|   |          |
|---|----------|
| 1 | DP2      |
| 1 | DPF1     |
| 1 | E4F1     |
| 1 | ECD      |
| 1 | EIF1B    |
| 1 | EPG5     |
| 1 | FAM109A  |
| 1 | FAM160B2 |
| 1 | FAM175A  |
| 1 | FAM193B  |
| 1 | FMR1     |
| 1 | FOXJ2    |
| 1 | FOXRED2  |
| 1 | GEMIN2   |
| 1 | GIGYF1   |
| 1 | GLRX3    |
| 1 | GLT8D1   |
| 1 | GRK6     |
| 1 | GTF2E1   |
| 1 | HAUS3    |
| 1 | HAUS5    |
| 1 | HEG1     |
| 1 | HES4     |
| 1 | HEXIM2   |
| 1 | HIPK3    |
| 1 | HMBS     |
| 1 | HMGN3    |
| 1 | HOMEZ    |
| 1 | HSPA12A  |
| 1 | IFI35    |
| 1 | IKZF4    |
| 1 | IL17RE   |
| 1 | INTS6    |
| 1 | IPO9     |
| 1 | ITPRIPL2 |
| 1 | LAGE3    |
| 1 | LMCD1    |
| 1 | LRIG2    |
| 1 | LRRC8D   |
| 1 | MAMSTR   |
| 1 | MBNL2    |
| 1 | MCPH1    |
| 1 | MED17    |

|   |          |
|---|----------|
| 1 | MED18    |
| 1 | MED29    |
| 1 | MED30    |
| 1 | MED9     |
| 1 | MEF2BNB  |
| 1 | MFAP1    |
| 1 | MGME1    |
| 1 | MIDN     |
| 1 | MORF4L2  |
| 1 | MPV17L   |
| 1 | MRFAP1L1 |
| 1 | MYEF2    |
| 1 | NAA16    |
| 1 | NAA50    |
| 1 | NHLRC3   |
| 1 | NOL3     |
| 1 | NOTCH2   |
| 1 | NR2C2AP  |
| 1 | NR2F1    |
| 1 | NRBF2    |
| 1 | NUDT16   |
| 1 | NUDT21   |
| 1 | PAN3     |
| 1 | PAPD5    |
| 1 | PAPOLG   |
| 1 | PCGF6    |
| 1 | PFDN6    |
| 1 | PKIG     |
| 1 | PLEKHG2  |
| 1 | POU2F1   |
| 1 | PPIH     |
| 1 | PROSER1  |
| 1 | PRR14    |
| 1 | PSMC3IP  |
| 1 | PTPDC1   |
| 1 | RAB22A   |
| 1 | RABGAP1  |
| 1 | RAD51D   |
| 1 | RANGRF   |
| 1 | RASSF8   |
| 1 | RBCK1    |
| 1 | RBM14    |
| 1 | RCOR2    |

|   |           |
|---|-----------|
| 1 | REEP6     |
| 1 | RFX5      |
| 1 | RIPK2     |
| 1 | RNF111    |
| 1 | RNF144B   |
| 1 | RUNDC1    |
| 1 | S100A13   |
| 1 | S100P     |
| 1 | SCAF1     |
| 1 | SEC14L1   |
| 1 | sep-01    |
| 1 | SIMC1     |
| 1 | SKI       |
| 1 | SLC35E2B  |
| 1 | SLC5A9    |
| 1 | SPATA2    |
| 1 | SPRYD7    |
| 1 | SRRM1     |
| 1 | SRSF5     |
| 1 | ST20      |
| 1 | TADA1     |
| 1 | TAF1      |
| 1 | TAF4      |
| 1 | TAF6L     |
| 1 | TBC1D22A  |
| 1 | TBX2      |
| 1 | TMEM115   |
| 1 | TMEM141   |
| 1 | TMEM186   |
| 1 | TMEM223   |
| 1 | TMEM70    |
| 1 | TNFRSF10D |
| 1 | TOLLIP    |
| 1 | TPRKB     |
| 1 | TPST1     |
| 1 | TRNAU1AP  |
| 1 | TTC28     |
| 1 | TTC31     |
| 1 | TWF1      |
| 1 | TYW1      |
| 1 | UCK1      |
| 1 | USP2      |
| 1 | USP54     |

|   |          |
|---|----------|
| 1 | VCPIP1   |
| 1 | VWA1     |
| 1 | WAC      |
| 1 | WDR73    |
| 1 | WHAMM    |
| 1 | ZBTB20   |
| 1 | ZBTB9    |
| 1 | ZC3H12A  |
| 1 | ZC3H6    |
| 1 | ZNF12    |
| 1 | ZNF136   |
| 1 | ZNF407   |
| 1 | ZNF600   |
| 1 | ZNF672   |
| 1 | ZNF720   |
| 1 | ZNF768   |
| 1 | ZNF784   |
| 1 | ZNFX1    |
| 2 | AASDHPPT |
| 2 | ACYP2    |
| 2 | ADAM15   |
| 2 | AGGF1    |
| 2 | AGO2     |
| 2 | AGT      |
| 2 | AP2M1    |
| 2 | AP4M1    |
| 2 | APOA1    |
| 2 | ARFIP2   |
| 2 | ARL8B    |
| 2 | ARPC5L   |
| 2 | ATF5     |
| 2 | AXL      |
| 2 | BCAR1    |
| 2 | BCAR3    |
| 2 | BCAS3    |
| 2 | BMPR1A   |
| 2 | BPHL     |
| 2 | C9orf3   |
| 2 | CAMK2G   |
| 2 | CCBL1    |
| 2 | CCBL2    |
| 2 | CD46     |
| 2 | CD7      |

|   |         |
|---|---------|
| 2 | CEBPA   |
| 2 | CEP83   |
| 2 | CFD     |
| 2 | CHMP7   |
| 2 | CHRNA1  |
| 2 | CIC     |
| 2 | CLDN6   |
| 2 | CLIP2   |
| 2 | COL16A1 |
| 2 | CPB2    |
| 2 | CYFIP2  |
| 2 | DAB2IP  |
| 2 | DDAH1   |
| 2 | DGKA    |
| 2 | DKK1    |
| 2 | DNAAF2  |
| 2 | DSCR3   |
| 2 | EIF4E   |
| 2 | EPO     |
| 2 | ESAM    |
| 2 | ETS2    |
| 2 | ETV4    |
| 2 | EVPL    |
| 2 | EXOC4   |
| 2 | F11R    |
| 2 | F5      |
| 2 | FADD    |
| 2 | FAS     |
| 2 | FBXO3   |
| 2 | FCGRT   |
| 2 | FCHSD1  |
| 2 | FKBP10  |
| 2 | FLOT1   |
| 2 | GFI1    |
| 2 | GLDC    |
| 2 | GLIS2   |
| 2 | GOLGA1  |
| 2 | GPER1   |
| 2 | GPHN    |
| 2 | GPX7    |
| 2 | HERC1   |
| 2 | HIP1R   |
| 2 | HIPK2   |



|   |          |
|---|----------|
| 2 | HNF1A    |
| 2 | HP       |
| 2 | HS6ST1   |
| 2 | HSPA13   |
| 2 | HSPA8    |
| 2 | ID1      |
| 2 | IRS1     |
| 2 | ITGA2    |
| 2 | ITIH5    |
| 2 | KIAA1549 |
| 2 | LAMA5    |
| 2 | LAMTOR1  |
| 2 | LGALS3   |
| 2 | LGALS3BP |
| 2 | MAT2B    |
| 2 | MERTK    |
| 2 | MFSD3    |
| 2 | MLST8    |
| 2 | MON1B    |
| 2 | MORC3    |
| 2 | MPZL2    |
| 2 | MSRB1    |
| 2 | MTR      |
| 2 | MUL1     |
| 2 | NAB2     |
| 2 | NCF2     |
| 2 | NCR3LG1  |
| 2 | NEDD9    |
| 2 | NES      |
| 2 | NGEF     |
| 2 | NKX3-1   |
| 2 | NR5A1    |
| 2 | NUDCD1   |
| 2 | ONECUT1  |
| 2 | OSTF1    |
| 2 | PACSIN2  |
| 2 | PANX1    |
| 2 | PAPSS1   |
| 2 | PAX6     |
| 2 | PDCL     |
| 2 | PDXK     |
| 2 | PFN1     |
| 2 | PIK3C3   |

|   |          |
|---|----------|
| 2 | PIK3CB   |
| 2 | PIP4K2C  |
| 2 | PKP4     |
| 2 | PLSCR1   |
| 2 | PNRC2    |
| 2 | PPP2CB   |
| 2 | PPP5C    |
| 2 | PRDX4    |
| 2 | PRKAA1   |
| 2 | PROM1    |
| 2 | PROS1    |
| 2 | PRR7     |
| 2 | PRRC2A   |
| 2 | PTPN2    |
| 2 | RAB23    |
| 2 | RAB8A    |
| 2 | RAF1     |
| 2 | RANBP9   |
| 2 | RARA     |
| 2 | RBP1     |
| 2 | REPIN1   |
| 2 | RIC8A    |
| 2 | RICTOR   |
| 2 | RMDN1    |
| 2 | RPS6KB2  |
| 2 | RRAS2    |
| 2 | RTKN     |
| 2 | SAP30    |
| 2 | SDCBP    |
| 2 | SEPP1    |
| 2 | SERPINE2 |
| 2 | SFXN3    |
| 2 | SGK2     |
| 2 | SH3GL1   |
| 2 | SHANK2   |
| 2 | SLC29A3  |
| 2 | SLC35B3  |
| 2 | SLC35E3  |
| 2 | SLC6A14  |
| 2 | SLC7A5   |
| 2 | SORBS1   |
| 2 | SOX18    |
| 2 | SOX4     |

|   |           |
|---|-----------|
| 2 | SOX9      |
| 2 | SPP1      |
| 2 | SPRY2     |
| 2 | SRC       |
| 2 | STK11     |
| 2 | STOM      |
| 2 | STUB1     |
| 2 | STX1A     |
| 2 | SUFU      |
| 2 | TAB2      |
| 2 | TAP1      |
| 2 | TAP2      |
| 2 | TESC      |
| 2 | TFPI      |
| 2 | TGFB1     |
| 2 | TLCD1     |
| 2 | TMEM25    |
| 2 | TMX1      |
| 2 | TNFRSF11A |
| 2 | TNRC6A    |
| 2 | TOM1L1    |
| 2 | TOPORS    |
| 2 | TOR1A     |
| 2 | TRAF3     |
| 2 | TRAF6     |
| 2 | TRIM25    |
| 2 | TRIM39    |
| 2 | TXNRD3    |
| 2 | UAP1L1    |
| 2 | UBAC1     |
| 2 | UBAP1     |
| 2 | UHMK1     |
| 2 | UVRAG     |
| 2 | VAMP2     |
| 2 | VPS33B    |
| 2 | VTI1A     |
| 2 | ZBTB14    |
| 2 | ZBTB17    |
| 2 | ZBTB22    |
| 2 | ZBTB7B    |
| 2 | ZDHHC17   |
| 2 | ZFPM1     |
| 3 | ABCG8     |

|   |           |
|---|-----------|
| 3 | ACACA     |
| 3 | ACADM     |
| 3 | ACP2      |
| 3 | ACSL4     |
| 3 | ACY1      |
| 3 | ADD1      |
| 3 | AKAP11    |
| 3 | ANKIB1    |
| 3 | ANKRD26   |
| 3 | AP3M2     |
| 3 | AP5S1     |
| 3 | APLP1     |
| 3 | APOM      |
| 3 | AREL1     |
| 3 | ARPP19    |
| 3 | ARRDC1    |
| 3 | ATP2B4    |
| 3 | BAMBI     |
| 3 | C11orf49  |
| 3 | C11orf71  |
| 3 | C11orf95  |
| 3 | C14orf1   |
| 3 | C19orf10  |
| 3 | C1GALT1C1 |
| 3 | C5orf66   |
| 3 | C6orf1    |
| 3 | CHURC1    |
| 3 | CINP      |
| 3 | CLDN15    |
| 3 | CPN1      |
| 3 | CPN2      |
| 3 | CRIP3     |
| 3 | DGKQ      |
| 3 | DNAJB11   |
| 3 | EFCAB14   |
| 3 | ELOVL6    |
| 3 | EPHX1     |
| 3 | EPN1      |
| 3 | ERV3-1    |
| 3 | FADS2     |
| 3 | FADS3     |
| 3 | FCHO2     |
| 3 | FNBP1L    |

|   |          |
|---|----------|
| 3 | FZD3     |
| 3 | FZD4     |
| 3 | GDPD5    |
| 3 | GPR56    |
| 3 | GPX3     |
| 3 | GSTA1    |
| 3 | GTF2IRD1 |
| 3 | HIF1AN   |
| 3 | HMGCR    |
| 3 | HPS6     |
| 3 | IDE      |
| 3 | IDS      |
| 3 | IL11RA   |
| 3 | IMPA1    |
| 3 | INPP1    |
| 3 | INPP5K   |
| 3 | IQGAP2   |
| 3 | JAGN1    |
| 3 | JMJD4    |
| 3 | LAD1     |
| 3 | LCAT     |
| 3 | LCLAT1   |
| 3 | LGR4     |
| 3 | LIFR     |
| 3 | LONRF3   |
| 3 | LPAR6    |
| 3 | LRP4     |
| 3 | LRRC23   |
| 3 | MARVELD3 |
| 3 | MESDC2   |
| 3 | MINPP1   |
| 3 | MMP15    |
| 3 | MOGAT3   |
| 3 | NCEH1    |
| 3 | NCKAP5L  |
| 3 | NEK8     |
| 3 | NIT1     |
| 3 | NOTUM    |
| 3 | NR1H3    |
| 3 | NRGN     |
| 3 | OSGIN2   |
| 3 | PALM     |
| 3 | PAQR7    |

|   |           |
|---|-----------|
| 3 | PET117    |
| 3 | PGP       |
| 3 | PHLPP1    |
| 3 | PHLPP2    |
| 3 | PIPOX     |
| 3 | PITPNM2   |
| 3 | PLA2G12B  |
| 3 | PLA2G15   |
| 3 | PLLP      |
| 3 | PLXNB1    |
| 3 | PPAPDC2   |
| 3 | PRMT9     |
| 3 | PTPN4     |
| 3 | RAB18     |
| 3 | RAB3GAP2  |
| 3 | RABGGTB   |
| 3 | RAP1GAP   |
| 3 | RAP2C     |
| 3 | RASA2     |
| 3 | RBM48     |
| 3 | RNF43     |
| 3 | RNF6      |
| 3 | RNFT2     |
| 3 | SDF2      |
| 3 | SEMA3B    |
| 3 | SEMA6B    |
| 3 | SERPINA10 |
| 3 | SERPINC1  |
| 3 | SFT2D3    |
| 3 | SGSH      |
| 3 | SH3BP1    |
| 3 | SLC12A5   |
| 3 | SLC27A4   |
| 3 | SLC37A3   |
| 3 | SLC37A4   |
| 3 | SLC5A3    |
| 3 | SLMO1     |
| 3 | SNX18     |
| 3 | SOWAHC    |
| 3 | SPIN4     |
| 3 | STARD10   |
| 3 | STARD4    |
| 3 | STARD5    |

|   |          |
|---|----------|
| 3 | SULT1A2  |
| 3 | SYDE1    |
| 3 | SYNGR2   |
| 3 | SYPL1    |
| 3 | TBC1D7   |
| 3 | TEX2     |
| 3 | TGFBR3   |
| 3 | THEM6    |
| 3 | TIAM2    |
| 3 | TMEM161A |
| 3 | TMEM37   |
| 3 | TPD52    |
| 3 | TUBE1    |
| 3 | UCP2     |
| 3 | VPS13A   |
| 3 | WDR7     |
| 3 | XYLT2    |
| 3 | YIF1A    |
| 3 | ZDHHC2   |
| 3 | ZNF142   |
| 3 | ZNF331   |
| 3 | ZNF37A   |
| 3 | ZNF7     |
| 3 | ZNF92    |
| 4 | AARS     |
| 4 | ABCD1    |
| 4 | ABHD11   |
| 4 | ABHD4    |
| 4 | ABHD5    |
| 4 | ABHD8    |
| 4 | ACN9     |
| 4 | AFF1     |
| 4 | AGMAT    |
| 4 | AIG1     |
| 4 | AKR1D1   |
| 4 | ALDOC    |
| 4 | ALG1     |
| 4 | ALG11    |
| 4 | APOOL    |
| 4 | ARL4A    |
| 4 | ARMC1    |
| 4 | ARSA     |
| 4 | B3GNTL1  |

|   |            |
|---|------------|
| 4 | B4GALT7    |
| 4 | B9D1       |
| 4 | BBS7       |
| 4 | BCL9L      |
| 4 | BTBD1      |
| 4 | BTBD10     |
| 4 | C12orf76   |
| 4 | C15orf41   |
| 4 | C2CD3      |
| 4 | CARS2      |
| 4 | CCDC64     |
| 4 | CDAN1      |
| 4 | CEMIP      |
| 4 | CEP120     |
| 4 | CEP192     |
| 4 | CEP41      |
| 4 | CERS1      |
| 4 | CES2       |
| 4 | CHPF2      |
| 4 | CHRNA5     |
| 4 | CHST13     |
| 4 | CHST7      |
| 4 | CHTF8      |
| 4 | CLPTM1     |
| 4 | CMTM7      |
| 4 | CNIH4      |
| 4 | CNN3       |
| 4 | COMMD4     |
| 4 | COQ4       |
| 4 | COQ5       |
| 4 | CRELD1     |
| 4 | CSGALNACT2 |
| 4 | CTSC       |
| 4 | DEGS1      |
| 4 | DFNB31     |
| 4 | DLST       |
| 4 | DNAJC30    |
| 4 | DOLK       |
| 4 | DZIP3      |
| 4 | EDEM2      |
| 4 | EMC6       |
| 4 | ENGASE     |
| 4 | ENO3       |



|   |          |
|---|----------|
| 4 | ERLIN1   |
| 4 | FAM120C  |
| 4 | FAM73A   |
| 4 | FH       |
| 4 | GANC     |
| 4 | GLA      |
| 4 | GMCL1    |
| 4 | GMPPB    |
| 4 | GPAA1    |
| 4 | GPR157   |
| 4 | GSTCD    |
| 4 | HARS     |
| 4 | HEPACAM  |
| 4 | HEXB     |
| 4 | HLF      |
| 4 | HMGXB3   |
| 4 | HOGA1    |
| 4 | HPN      |
| 4 | HSD17B2  |
| 4 | IFT172   |
| 4 | IMPACT   |
| 4 | ISOC1    |
| 4 | JADE2    |
| 4 | KDELC2   |
| 4 | KIAA2018 |
| 4 | KLHL18   |
| 4 | KLHL9    |
| 4 | L2HGDH   |
| 4 | LIPT1    |
| 4 | LMAN2L   |
| 4 | LRRC42   |
| 4 | LRSAM1   |
| 4 | MAN1A1   |
| 4 | MANEAL   |
| 4 | MARCH9   |
| 4 | MATN3    |
| 4 | MECR     |
| 4 | MEST     |
| 4 | METRNL   |
| 4 | METRNL   |
| 4 | METTL21B |
| 4 | METTL6   |
| 4 | MIPEP    |

|   |          |
|---|----------|
| 4 | MOGS     |
| 4 | MPI      |
| 4 | MPPE1    |
| 4 | MREG     |
| 4 | MRPS36   |
| 4 | NAGPA    |
| 4 | NDUFS7   |
| 4 | NINL     |
| 4 | NIPSNAP1 |
| 4 | NMNAT1   |
| 4 | NPHP3    |
| 4 | NT5DC2   |
| 4 | NUS1     |
| 4 | NXN      |
| 4 | OGDH     |
| 4 | OGFOD3   |
| 4 | OMA1     |
| 4 | OPN3     |
| 4 | OXLD1    |
| 4 | PDLIM2   |
| 4 | PEX10    |
| 4 | PEX19    |
| 4 | PGM2     |
| 4 | PIGB     |
| 4 | PIGC     |
| 4 | PIGO     |
| 4 | PIGZ     |
| 4 | PILRB    |
| 4 | PKD2     |
| 4 | POC1A    |
| 4 | POMGNT1  |
| 4 | PRDM15   |
| 4 | PRMT6    |
| 4 | PRODH2   |
| 4 | PRPS2    |
| 4 | PRUNE    |
| 4 | PSMG4    |
| 4 | PTRH1    |
| 4 | PYGL     |
| 4 | PYURF    |
| 4 | RAVER2   |
| 4 | REEP4    |
| 4 | RFT1     |

|   |          |
|---|----------|
| 4 | RHPN2    |
| 4 | RIN1     |
| 4 | RIN3     |
| 4 | RPIA     |
| 4 | RPUSD3   |
| 4 | RTN4IP1  |
| 4 | SAR1A    |
| 4 | SEC24B   |
| 4 | SGMS1    |
| 4 | SH3BP5L  |
| 4 | SH3GLB2  |
| 4 | SHROOM1  |
| 4 | SLC26A2  |
| 4 | SLC26A6  |
| 4 | SLC39A4  |
| 4 | SLC8B1   |
| 4 | SMIM12   |
| 4 | SMIM15   |
| 4 | SMTN     |
| 4 | SMYD5    |
| 4 | SNX11    |
| 4 | SQRDL    |
| 4 | SRD5A3   |
| 4 | SSBP4    |
| 4 | SSH3     |
| 4 | STARD9   |
| 4 | SYNE2    |
| 4 | SYNJ2BP  |
| 4 | TECPR1   |
| 4 | TMEM126A |
| 4 | TMEM132A |
| 4 | TMEM181  |
| 4 | TMEM261  |
| 4 | TMEM60   |
| 4 | TMEM62   |
| 4 | TMTC4    |
| 4 | TP53I13  |
| 4 | TPP1     |
| 4 | TRAPPC11 |
| 4 | TRAPPC12 |
| 4 | TRAPPC6A |
| 4 | TRIM35   |
| 4 | TSPAN13  |

|   |          |
|---|----------|
| 4 | UBALD2   |
| 4 | UFL1     |
| 4 | UGP2     |
| 4 | YY1AP1   |
| 4 | ZBTB39   |
| 4 | ZBTB41   |
| 4 | ZCWPW1   |
| 4 | ZKSCAN8  |
| 4 | ZMYM4    |
| 4 | ZNF133   |
| 4 | ZNF232   |
| 4 | ZNF248   |
| 4 | ZNF354A  |
| 4 | ZNF569   |
| 4 | ZNF747   |
| 4 | ZNF764   |
| 4 | ZSCAN26  |
| 5 | ANAPC15  |
| 5 | APEX2    |
| 5 | ATXN3    |
| 5 | BAX      |
| 5 | BRCA2    |
| 5 | CBX2     |
| 5 | CCNB1    |
| 5 | CCNB1IP1 |
| 5 | CCNF     |
| 5 | CCNJ     |
| 5 | CDC25C   |
| 5 | CDCA3    |
| 5 | CDK12    |
| 5 | CDKN2C   |
| 5 | CDT1     |
| 5 | CENPA    |
| 5 | CENPH    |
| 5 | CENPI    |
| 5 | CEP55    |
| 5 | CHAF1A   |
| 5 | CKAP2L   |
| 5 | CLASRP   |
| 5 | CLPX     |
| 5 | COPS2    |
| 5 | CTC1     |
| 5 | CWC25    |

|   |           |
|---|-----------|
| 5 | DDX39A    |
| 5 | DHFR      |
| 5 | DNAJA3    |
| 5 | DTL       |
| 5 | E2F2      |
| 5 | E2F3      |
| 5 | EME1      |
| 5 | ENOPH1    |
| 5 | ESCO2     |
| 5 | ESPL1     |
| 5 | FBXL17    |
| 5 | FOXK1     |
| 5 | GEMIN7    |
| 5 | GIN51     |
| 5 | GPS2      |
| 5 | H2AFX     |
| 5 | HDAC5     |
| 5 | HDAC8     |
| 5 | HDHD1     |
| 5 | HIST1H2BD |
| 5 | HLTF      |
| 5 | HMGA2     |
| 5 | IQGAP3    |
| 5 | KIF11     |
| 5 | KIF4A     |
| 5 | KIFC1     |
| 5 | KPNA4     |
| 5 | LANCL1    |
| 5 | MAP2K6    |
| 5 | MAT2A     |
| 5 | MCL1      |
| 5 | MKI67     |
| 5 | MOCS3     |
| 5 | MSH2      |
| 5 | MT-ND1    |
| 5 | MTFR2     |
| 5 | MUS81     |
| 5 | MYO1C     |
| 5 | NDUFAF1   |
| 5 | NEK2      |
| 5 | NOLC1     |
| 5 | NUP37     |
| 5 | NUP54     |

|   |          |
|---|----------|
| 5 | OTUD4    |
| 5 | PHF5A    |
| 5 | PIP4K2B  |
| 5 | PKMYT1   |
| 5 | POLA2    |
| 5 | PPIL2    |
| 5 | PPP4C    |
| 5 | PRC1     |
| 5 | PRKRA    |
| 5 | PSRC1    |
| 5 | RAD23B   |
| 5 | RB1      |
| 5 | RBBP4    |
| 5 | RBBP9    |
| 5 | RBL1     |
| 5 | RBL2     |
| 5 | RBX1     |
| 5 | RECQL    |
| 5 | RHNO1    |
| 5 | RNASEH2C |
| 5 | RPA1     |
| 5 | SEC16A   |
| 5 | SETD1B   |
| 5 | SGOL1    |
| 5 | SNRNP25  |
| 5 | SNRPA1   |
| 5 | STMN1    |
| 5 | SUMO2    |
| 5 | TAF1B    |
| 5 | TCHP     |
| 5 | TDP1     |
| 5 | TFDP1    |
| 5 | TIPIN    |
| 5 | TRIM23   |
| 5 | TRIM32   |
| 5 | UBA3     |
| 5 | UBE2A    |
| 5 | UBE2D1   |
| 5 | UBE2T    |
| 5 | UBE2V1   |
| 5 | UBE2Z    |
| 5 | UBOX5    |
| 5 | UHRF2    |

|   |            |
|---|------------|
| 5 | UMPS       |
| 5 | USP15      |
| 5 | WAPAL      |
| 5 | XRCC3      |
| 6 | AEN        |
| 6 | AGFG2      |
| 6 | ANKRD36B   |
| 6 | APOBEC3C   |
| 6 | ARHGEF26   |
| 6 | ASPHD1     |
| 6 | ASTE1      |
| 6 | ATP5L      |
| 6 | ATPIF1     |
| 6 | B4GALNT4   |
| 6 | BRF2       |
| 6 | BYSL       |
| 6 | C14orf119  |
| 6 | C14orf159  |
| 6 | C17orf80   |
| 6 | CA5A       |
| 6 | CAMKMT     |
| 6 | CARKD      |
| 6 | CCDC109B   |
| 6 | CCDC137    |
| 6 | CCDC77     |
| 6 | CCDC86     |
| 6 | CCDC9      |
| 6 | CCDC97     |
| 6 | CDK5RAP1   |
| 6 | CDKN2AIPNL |
| 6 | CDYL       |
| 6 | CENPQ      |
| 6 | CISD3      |
| 6 | CMC1       |
| 6 | CTPS1      |
| 6 | CTU1       |
| 6 | DCAF16     |
| 6 | DCUN1D3    |
| 6 | DDX10      |
| 6 | DDX28      |
| 6 | DDX31      |
| 6 | DDX55      |
| 6 | DDX59      |

|   |          |
|---|----------|
| 6 | DHX35    |
| 6 | DMTF1    |
| 6 | DQX1     |
| 6 | EEF1B2   |
| 6 | EIF1AD   |
| 6 | EIF4A3   |
| 6 | ELAC1    |
| 6 | ENC1     |
| 6 | EPS8L2   |
| 6 | ESPN     |
| 6 | ETAA1    |
| 6 | EXOSC2   |
| 6 | FAM169A  |
| 6 | FAM212B  |
| 6 | FAM21A   |
| 6 | FBXO4    |
| 6 | FBXO9    |
| 6 | FBXW9    |
| 6 | FICD     |
| 6 | FOXRED1  |
| 6 | FUT10    |
| 6 | GEMIN6   |
| 6 | GEMIN8   |
| 6 | GIN54    |
| 6 | GM2A     |
| 6 | GMEB2    |
| 6 | GUF1     |
| 6 | HEMK1    |
| 6 | HPCAL1   |
| 6 | IER5L    |
| 6 | IGF2BP3  |
| 6 | IMP3     |
| 6 | INO80B   |
| 6 | INO80D   |
| 6 | INO80E   |
| 6 | KCTD10   |
| 6 | KHDRBS3  |
| 6 | KIAA0196 |
| 6 | KIAA0922 |
| 6 | KLHL26   |
| 6 | LATS2    |
| 6 | LYAR     |
| 6 | LYRM5    |



|   |         |
|---|---------|
| 6 | METTL1  |
| 6 | METTL7B |
| 6 | MPC1    |
| 6 | MPP6    |
| 6 | MRI1    |
| 6 | MRPL19  |
| 6 | MRPL28  |
| 6 | MRPL34  |
| 6 | MRPL44  |
| 6 | MRPL46  |
| 6 | MRPS18A |
| 6 | MT-CO3  |
| 6 | N4BP1   |
| 6 | NDFIP1  |
| 6 | NDFIP2  |
| 6 | NDUFA8  |
| 6 | NELFE   |
| 6 | NHP2    |
| 6 | NIFK    |
| 6 | NIP7    |
| 6 | NOM1    |
| 6 | NOP10   |
| 6 | NOP16   |
| 6 | NOP56   |
| 6 | OAF     |
| 6 | ORMDL2  |
| 6 | PDDC1   |
| 6 | PGAM5   |
| 6 | PHF20L1 |
| 6 | PHF23   |
| 6 | PIDD1   |
| 6 | PITHD1  |
| 6 | POLD3   |
| 6 | POLR1A  |
| 6 | POLR1C  |
| 6 | POLR2H  |
| 6 | POLR2L  |
| 6 | POLR3K  |
| 6 | PPAN    |
| 6 | PPP1R8  |
| 6 | PPP1R9A |
| 6 | PPP6R1  |
| 6 | PPP6R2  |

|   |          |
|---|----------|
| 6 | PUS7L    |
| 6 | PYROXD1  |
| 6 | QTRT1    |
| 6 | QTRTD1   |
| 6 | R3HCC1   |
| 6 | RAB21    |
| 6 | RANBP6   |
| 6 | RCN2     |
| 6 | RNF126   |
| 6 | RNF19B   |
| 6 | RNF7     |
| 6 | RNMTL1   |
| 6 | RPL27    |
| 6 | RPL39    |
| 6 | RPP14    |
| 6 | RPP25L   |
| 6 | RPRD1B   |
| 6 | RPS12    |
| 6 | RPS15A   |
| 6 | RPS23    |
| 6 | RPS27L   |
| 6 | RRP1     |
| 6 | RRP7A    |
| 6 | RRP8     |
| 6 | RRS1     |
| 6 | RTCA     |
| 6 | SAV1     |
| 6 | SAYSD1   |
| 6 | SDCCAG3  |
| 6 | SF3B6    |
| 6 | SFXN4    |
| 6 | SLC22A3  |
| 6 | SLC7A6OS |
| 6 | SNAPC4   |
| 6 | SPECC1   |
| 6 | SRFBP1   |
| 6 | SRRD     |
| 6 | STEAP2   |
| 6 | TAOK2    |
| 6 | TCTA     |
| 6 | THUMPD2  |
| 6 | TIGD1    |
| 6 | TIMM9    |

|   |          |
|---|----------|
| 6 | TMEM106C |
| 6 | TMEM19   |
| 6 | TMEM97   |
| 6 | TOE1     |
| 6 | TRIM41   |
| 6 | TRIT1    |
| 6 | TRMT10C  |
| 6 | UBBP4    |
| 6 | UBE2F    |
| 6 | UFM1     |
| 6 | UTP14C   |
| 6 | VBP1     |
| 6 | VPRBP    |
| 6 | WASH2P   |
| 6 | WBSCR22  |
| 6 | WDR70    |
| 6 | WRAP73   |
| 6 | ZBED5    |
| 6 | ZC2HC1A  |
| 6 | ZDHHC23  |
| 6 | ZGRF1    |
| 6 | ZHX1     |
| 6 | ZNF101   |
| 6 | ZNF358   |
| 6 | ZNF445   |
| 6 | ZNF473   |
| 6 | ZNF514   |
| 6 | ZNF557   |
| 6 | ZNF574   |
| 6 | ZNF777   |
| 6 | ZNF788   |
| 6 | ZNHIT3   |
| 6 | ZNRD1    |

**Table S12.** GO terms and KEGG pathways of STRING clusters of mRNAs regulated by miR-222-5p.

| STRING Cluster | Category                         | Term       | Description                                       | p-value  | Genes                                                              |
|----------------|----------------------------------|------------|---------------------------------------------------|----------|--------------------------------------------------------------------|
| 1              | GO Term<br>Cellular<br>Component | GO:0016592 | mediator complex                                  | 6.13E-05 | RBM14, MED30, MED9, MED29, MED18, MED17                            |
|                | GO Term<br>Molecular<br>Function | GO:0001104 | RNA polymerase II transcription cofactor activity | 6.98E-05 | RBM14, MED30, CNOT2, MED9, MED18, MED17                            |
|                | GO Term<br>Biological<br>Process | GO:0006397 | mRNA processing                                   | 1.40E-04 | NUDT21, MBNL2, PAN3, GEMIN2, PAPD5, FMR1, ECD, SRSF5, SCAF1, SRRM1 |

|  |                                  |            |         |          |                                                                                                                                                                                                                                                                                                                                                                                                                                                                                                                                                                         |
|--|----------------------------------|------------|---------|----------|-------------------------------------------------------------------------------------------------------------------------------------------------------------------------------------------------------------------------------------------------------------------------------------------------------------------------------------------------------------------------------------------------------------------------------------------------------------------------------------------------------------------------------------------------------------------------|
|  | GO Term<br>Cellular<br>Component | GO:0005634 | nucleus | 9.43E-04 | FMR1, GEMIN2, ZBTB20, IFI35, PTPDC1, IKZF4, MED17, ZNF407, PAPOLG, ADNP2, ZNF600, NUDT16, LMCD1, HMGN3, RNF111, RBM14, CDKL5, MBNL2, GLRX3, MAMSTR, CEP131, ZNF12, TRNAU1AP, SRRM1, TAF6L, RAD51D, MORF4L2, RFX5, WAC, FAM193B, SRSF5, C19ORF66, CGGBP1, ZNF672, NOTCH2, HOMEZ, DDX1, DDX23, SPATA2, GTF2E1, LAGE3, PSMC3IP, MED30, S100A13, ZNF784, HES4, HEXIM2, PCGF6, POU2F1, MYEF2, CNBP, ECD, FOXJ2, TPRKB, NR2F1, SCAF1, HIPK3, TBX2, ZBTB9, SKI, NUDT21, ZNFX1, TMEM115, CNOT2, FAM175A, RANGRF, S100P, NAA16, CENPBD1, REEP6, PKIG, DCP1A, ZNF136, RCOR2, TAF1 |
|--|----------------------------------|------------|---------|----------|-------------------------------------------------------------------------------------------------------------------------------------------------------------------------------------------------------------------------------------------------------------------------------------------------------------------------------------------------------------------------------------------------------------------------------------------------------------------------------------------------------------------------------------------------------------------------|

|  |                                                       |            |                              |            |                                                                                                                                                                                                                                                                       |
|--|-------------------------------------------------------|------------|------------------------------|------------|-----------------------------------------------------------------------------------------------------------------------------------------------------------------------------------------------------------------------------------------------------------------------|
|  | <b>GO Term</b><br><b>Biological</b><br><b>Process</b> | GO:0006351 | transcription, DNA-templated | 0.00114391 | ZNF672, HOMEZ, DDX1, ZBTB20, IKZF4,<br>ZNF407, DPF1, ADNP2, E4F1, ZNF600,<br>LMCD1, ZNF784, HES4, HEXIM2, RBM14,<br>PCGF6, POU2F1, MYEF2, MAMSTR, CNBP,<br>NR2F1, MED9, ZNF12, MED29, TBX2, ZBTB9,<br>SKI, MORF4L2, CNOT2, RFX5, WAC, TADA1,<br>BCORL1, RCOR2, CGGBP1 |
|--|-------------------------------------------------------|------------|------------------------------|------------|-----------------------------------------------------------------------------------------------------------------------------------------------------------------------------------------------------------------------------------------------------------------------|

|  |                                           |            |                 |            |                                                                                                                                                                                                                                                                                                                                                                            |
|--|-------------------------------------------|------------|-----------------|------------|----------------------------------------------------------------------------------------------------------------------------------------------------------------------------------------------------------------------------------------------------------------------------------------------------------------------------------------------------------------------------|
|  | <b>GO Term<br/>Cellular<br/>Component</b> | GO:0005654 | nucleoplasm     | 0.00119285 | CUEDC2, FMR1, GEMIN2, ZBTB20, PTPDC1, IKZF4, MED17, PAPOLG, NUDT16, LMCD1, HMGN3, RNF111, RBM14, CDKL5, USP2, HAUS3, ZNF12, MED29, SRRM1, RAD51D, MORF4L2, WAC, FAM193B, PPIH, SRSF5, BCORL1, CGGBP1, MCPH1, NOTCH2, DDX1, DDX23, GTF2E1, TMEM70, MED30, DNAJB4, E4F1, NRBF2, NR2C2AP, HEXIM2, POU2F1, MYEF2, ECD, NR2F1, SKI, NUDT21, FAM175A, TADA1, RANGRF, INTS6, TAF1 |
|  | <b>KEGG Pathway</b>                       | hsa03018   | RNA degradation | 0.00121774 | PAN3, CNOT2, PAPD5, NUDT16, DCP1A                                                                                                                                                                                                                                                                                                                                          |

|  |                                           |            |                                                                      |            |                                                                                                                                                                                                            |
|--|-------------------------------------------|------------|----------------------------------------------------------------------|------------|------------------------------------------------------------------------------------------------------------------------------------------------------------------------------------------------------------|
|  | <b>GO Term<br/>Biological<br/>Process</b> | GO:0006367 | transcription initiation from RNA polymerase II promoter             | 0.00158464 | NOTCH2, MED30, NR2F1, NRBF2, GTF2E1, MED17, TAF1, NR2C2AP                                                                                                                                                  |
|  | <b>GO Term<br/>Biological<br/>Process</b> | GO:0008380 | RNA splicing                                                         | 0.00295772 | MBNL2, GEMIN2, FMR1, ECD, DDX23, NOL3, SCAF1, SRRM1                                                                                                                                                        |
|  | <b>GO Term<br/>Biological<br/>Process</b> | GO:0000122 | negative regulation of transcription from RNA polymerase II promoter | 0.00634109 | HOMEZ, HEXIM2, PCGF6, USP2, NR2F1, ZBTB20, TBX2, SKI, CNOT2, RFX5, E4F1, PKIG, LMCD1, ZNF136, RCOR2, CGGBP1                                                                                                |
|  | <b>GO Term<br/>Molecular<br/>Function</b> | GO:0003677 | DNA binding                                                          | 0.00854655 | ZNF672, HOMEZ, RABGAP1, DDX1, ZBTB20, PSMC3IP, ZNF407, ZNF768, ADNP2, E4F1, ZNF600, HMGN3, ZNF784, HES4, PCGF6, MYEF2, CNBP, ZNF12, SRRM1, TBX2, ZBTB9, TAF6L, RAD51D, PAPD5, RFX5, CENPBD1, ZNF136, RCOR2 |



|  |                                           |            |                                                                      |            |                                             |
|--|-------------------------------------------|------------|----------------------------------------------------------------------|------------|---------------------------------------------|
|  | <b>GO Term<br/>Cellular<br/>Component</b> | GO:0005667 | transcription factor complex                                         | 0.00858483 | SKI, RBM14, NAA16, RCOR2, MED17, TAF1, TBX2 |
|  | <b>GO Term<br/>Biological<br/>Process</b> | GO:0043330 | response to exogenous dsRNA                                          | 0.01419145 | RIPK2, DDX1, CARD9                          |
|  | <b>GO Term<br/>Molecular<br/>Function</b> | GO:0030374 | ligand-dependent nuclear receptor transcription coactivator activity | 0.02404127 | PSMC3IP, RBM14, MED30, MED17                |
|  | <b>KEGG Pathway</b>                       | hsa03022   | Basal transcription factors                                          | 0.0302392  | TAF6L, GTF2E1, TAF1                         |

|  |                                  |            |           |            |                                                                                                                                                                                                                                                                                                                                                                                                                                                                                                           |
|--|----------------------------------|------------|-----------|------------|-----------------------------------------------------------------------------------------------------------------------------------------------------------------------------------------------------------------------------------------------------------------------------------------------------------------------------------------------------------------------------------------------------------------------------------------------------------------------------------------------------------|
|  | GO Term<br>Cellular<br>Component | GO:0005737 | cytoplasm | 0.03364923 | <p>CUEDC2, ANKRD13D, FMR1, GEMIN2, MPV17L, PTPDC1, TTC28, IPO9, PAPOLG, DPF1, EPG5, NUDT16, LMCD1, HMGN3, RNF111, RBM14, CDKL5, MBNL2, RIPK2, TRNAU1AP, IL17RE, ATXN2L, RNF144B, RAD51D, PAPD5, HMBS, FAM193B, PPIH, SRSF5, C19ORF66, BCORL1, MCPH1, HOMEZ, DDX1, SPATA2, TWF1, NOL3, GTF2E1, VCPIP1, SEC14L1, DNAJB4, S100A13, LRRC8D, E4F1, LRIG2, NRBF2, WHAMM, NAA50, HEXIM2, ANKRD27, MYEF2, CCZ1B, CARD9, ECD, TPRKB, HIPK3, SKI, TOLLIP, CNOT2, TADA1, RANGRF, S100P, CCM2, NAA16, PKIG, DCP1A</p> |
|--|----------------------------------|------------|-----------|------------|-----------------------------------------------------------------------------------------------------------------------------------------------------------------------------------------------------------------------------------------------------------------------------------------------------------------------------------------------------------------------------------------------------------------------------------------------------------------------------------------------------------|

|                                           |            |                                                 |            |                                                                                                       |
|-------------------------------------------|------------|-------------------------------------------------|------------|-------------------------------------------------------------------------------------------------------|
| <b>GO Term<br/>Cellular<br/>Component</b> | GO:0005813 | centrosome                                      | 0.03424058 | SKI, NUDT21, RAD51D, RABGAP1, CEP131, USP2, HAUS3, ZNF12, HAUS5, IKZF4, TTC28                         |
| <b>GO Term<br/>Molecular<br/>Function</b> | GO:0046966 | thyroid hormone receptor binding                | 0.03812749 | MED30, HMGN3, MED17                                                                                   |
| <b>GO Term<br/>Biological<br/>Process</b> | GO:0048845 | venous blood vessel morphogenesis               | 0.03907754 | HEG1, CCM2                                                                                            |
| <b>GO Term<br/>Biological<br/>Process</b> | GO:0000375 | RNA splicing, via transesterification reactions | 0.039507   | GEMIN2, DDX23, SRRM1                                                                                  |
| <b>GO Term<br/>Molecular<br/>Function</b> | GO:0042802 | identical protein binding                       | 0.04280087 | HEXIM2, MRFAP1L1, RIPK2, FMR1, USP2, FOXJ2, NOL3, NUDT21, TMEM115, VWA1, NUDT16, DCP1A, CGGBP1, MCPH1 |
| <b>GO Term<br/>Biological<br/>Process</b> | GO:0006369 | termination of RNA polymerase II transcription  | 0.04654127 | NUDT21, SRSF5, MED18, SRRM1                                                                           |

|   |                                           |            |                 |          |                                                                                                                                                                                                                                                                                                                                                                                                                                                                                                                                                                                                                                                                                                                                                                                                                                                                                                                                                                                                                   |
|---|-------------------------------------------|------------|-----------------|----------|-------------------------------------------------------------------------------------------------------------------------------------------------------------------------------------------------------------------------------------------------------------------------------------------------------------------------------------------------------------------------------------------------------------------------------------------------------------------------------------------------------------------------------------------------------------------------------------------------------------------------------------------------------------------------------------------------------------------------------------------------------------------------------------------------------------------------------------------------------------------------------------------------------------------------------------------------------------------------------------------------------------------|
| 2 | <b>GO Term<br/>Molecular<br/>Function</b> | GO:0005515 | protein binding | 3.97E-10 | <p>CYFIP2, COL16A1, RTKN, SERPINE2, EPO, NCF2, IRS1, GFI1, NAB2, HP, ZBTB22, F11R, ETS2, LGALS3, STK11, GOLGA1, TRIM25, ARFIP2, FBXO3, SOX9, OSTF1, SOX4, AP2M1, SH3GL1, DNAAF2, VPS33B, TAP2, TAP1, MUL1, ACYP2, HNF1A, DKK1, SAP30, UHMK1, TOM1L1, ADAM15, PKP4, RAF1, ATF5, PFN1, ZFPM1, STX1A, ARL8B, TNFRSF11A, GLIS2, TMEM25, RIC8A, SDCBP, PRDX4, VTI1A, PACSIN2, FADD, ZBTB7B, PROM1, ZBTB17, UVRAG, HSPA8, TOR1A, TGFB1, ZBTB14, UBAC1, PRRC2A, PPP5C, AGO2, ID1, PDCL, CEP83, TAB2, MON1B, BMPR1A, BCAR3, MTR, PIK3CB, GPHN, AP4M1, NUDCD1, GPER1, SUFU, MLST8, FLOT1, CIC, RAB8A, NKX3-1, BCAS3, ITGA2, TESC, RRAS2, GPX7, APOA1, PAX6, ETV4, ZDHHC17, TOPORS, F5, NR5A1, PLSCR1, TRAF3, TRAF6, RARA, EXOC4, PIK3C3, CD46, CHMP7, SHANK2, VAMP2, CEBPA, PRKAA1, SRC, NEDD9, MAT2B, HSPA13, PPP2CB, RAB23, SPP1, STOM, RICTOR, CAMK2G, EIF4E, AASDHPPT, MPZL2, DAB2IP, HIP1R, RANBP9, SORBS1, MERTK, AGT, HIPK2, PNRC2, TRIM39, AXL, SPRY2, AGGF1, UBAP1, FAS, STUB1, LAMTOR1, BCAR1, PTPN2, TNRC6A</p> |
|---|-------------------------------------------|------------|-----------------|----------|-------------------------------------------------------------------------------------------------------------------------------------------------------------------------------------------------------------------------------------------------------------------------------------------------------------------------------------------------------------------------------------------------------------------------------------------------------------------------------------------------------------------------------------------------------------------------------------------------------------------------------------------------------------------------------------------------------------------------------------------------------------------------------------------------------------------------------------------------------------------------------------------------------------------------------------------------------------------------------------------------------------------|

|  |                                           |            |         |          |                                                                                                                                                                                                                                                                                                                                                                                                                                                                                                                         |
|--|-------------------------------------------|------------|---------|----------|-------------------------------------------------------------------------------------------------------------------------------------------------------------------------------------------------------------------------------------------------------------------------------------------------------------------------------------------------------------------------------------------------------------------------------------------------------------------------------------------------------------------------|
|  | <b>GO Term<br/>Cellular<br/>Component</b> | GO:0005829 | cytosol | 1.36E-09 | CYFIP2, RTKN, SERPINE2, GLDC, NCF2, IRS1, DGKA, MTR, PIK3CB, AP4M1, STK11, HERC1, SUFU, GOLGA1, MLST8, TRIM25, FBXO3, ARFIP2, PIP4K2C, AP2M1, RAB8A, APOA1, TOM1L1, SLC7A5, PLSCR1, DDAH1, TRAF3, TRAF6, RBP1, EXOC4, PIK3C3, RAF1, PFN1, CHMP7, SGK2, STX1A, VAMP2, NGEF, PRKAA1, PDXK, SRC, MAT2B, PAPSS1, PPP2CB, SDCBP, PRDX4, UAP1L1, VTI1A, PACSIN2, RICTOR, FADD, CAMK2G, EIF4E, AASDHPPT, HSPA8, DAB2IP, RANBP9, SORBS1, PPP5C, TRIM39, AGO2, PDCL, SPRY2, CEP83, UBAP1, FAS, STUB1, TAB2, TNRC6A, BCAR1, MSRB1 |
|--|-------------------------------------------|------------|---------|----------|-------------------------------------------------------------------------------------------------------------------------------------------------------------------------------------------------------------------------------------------------------------------------------------------------------------------------------------------------------------------------------------------------------------------------------------------------------------------------------------------------------------------------|

|  |                                  |            |                       |          |                                                                                                                                                                                                                                                                                                                                                                                                               |
|--|----------------------------------|------------|-----------------------|----------|---------------------------------------------------------------------------------------------------------------------------------------------------------------------------------------------------------------------------------------------------------------------------------------------------------------------------------------------------------------------------------------------------------------|
|  | GO Term<br>Cellular<br>Component | GO:0070062 | extracellular exosome | 9.09E-07 | CYFIP2, LGALS3BP, PROS1, HP, ARPC5L, F11R, AP4M1, LGALS3, STK11, FLOT1, OSTF1, PIP4K2C, AP2M1, RAB8A, SLC6A14, RRAS2, APOA1, TOM1L1, SLC7A5, PLSCR1, DDAH1, ADAM15, CD46, PFN1, VAMP2, ARL8B, CFD, LAMA5, CPB2, PDXK, SRC, MAT2B, BPHL, EVPL, HSPA13, PPP2CB, SDCBP, PRDX4, RAB23, SPP1, PACSIN2, STOM, PROM1, EIF4E, AASDHPPT, HSPA8, TOR1A, DAB2IP, UBAC1, AGT, PRRC2A, AXL, CD7, FAS, STUB1, ESAM, LAMTOR1 |
|--|----------------------------------|------------|-----------------------|----------|---------------------------------------------------------------------------------------------------------------------------------------------------------------------------------------------------------------------------------------------------------------------------------------------------------------------------------------------------------------------------------------------------------------|

|  |                                   |            |                                                     |          |                                                                                                                    |
|--|-----------------------------------|------------|-----------------------------------------------------|----------|--------------------------------------------------------------------------------------------------------------------|
|  | <b>KEGG Pathway</b>               | hsa04150   | mTOR signaling pathway                              | 1.21E-05 | STK11, PRKAA1, IRS1, RPS6KB2, MLST8, RICTOR, PIK3CB, EIF4E                                                         |
|  | <b>GO Term Molecular Function</b> | GO:0019900 | kinase binding                                      | 1.86E-05 | CEBPA, PRKAA1, SRC, DAB2IP, FAS, STUB1, ATF5, STX1A                                                                |
|  | <b>GO Term Biological Process</b> | GO:0043491 | protein kinase B signaling                          | 2.84E-05 | TGFB1, AXL, RPS6KB2, SOX9, MERTK, NKX3-1                                                                           |
|  | <b>GO Term Cellular Component</b> | GO:0072562 | blood microparticle                                 | 3.40E-05 | LGALS3BP, HSPA8, SDCBP, TGFB1, PROS1, HP, STOM, APOA1, PFN1, AGT                                                   |
|  | <b>GO Term Biological Process</b> | GO:0045893 | positive regulation of transcription, DNA-templated | 5.72E-05 | ZBTB17, TGFB1, EPO, SRC, TESC, PAX6, HNF1A, ETS2, TOPORS, AGT, HIPK2, GLIS2, SOX18, RARA, SOX9, ATF5, SOX4, NKX3-1 |

|  |                                           |            |                                                                         |          |                                                                                                                                                                                             |
|--|-------------------------------------------|------------|-------------------------------------------------------------------------|----------|---------------------------------------------------------------------------------------------------------------------------------------------------------------------------------------------|
|  | <b>GO Term<br/>Biological<br/>Process</b> | GO:0045944 | positive regulation of transcription<br>from RNA polymerase II promoter | 7.73E-05 | CEBPA, ONECUT1, ETS2, GLIS2, SOX18,<br>GPER1, FADD, SOX9, SOX4, NKX3-1, BCAS3,<br>TGFB1, DAB2IP, PAX6, HNF1A, ETV4, HIPK2,<br>NR5A1, PLSCR1, TRAF6, AGO2, RARA,<br>RAF1, ATF5, PFN1, BMPR1A |
|  | <b>GO Term<br/>Biological<br/>Process</b> | GO:0007229 | integrin-mediated signaling<br>pathway                                  | 1.11E-04 | LAMA5, COL16A1, ADAM15, SRC, ITGA2,<br>NEDD9, APOA1, BCAR1                                                                                                                                  |



|  |                                           |            |                 |          |                                                                                                                                                                                                                                                                                                                                                                                                                                                                                   |
|--|-------------------------------------------|------------|-----------------|----------|-----------------------------------------------------------------------------------------------------------------------------------------------------------------------------------------------------------------------------------------------------------------------------------------------------------------------------------------------------------------------------------------------------------------------------------------------------------------------------------|
|  | <b>GO Term<br/>Cellular<br/>Component</b> | GO:0005886 | plasma membrane | 1.25E-04 | GLDC, IRS1, DGKA, PROS1, PIK3CB, F11R, GPHN, ETS2, PANX1, LGALS3, FCGRT, GPER1, FLOT1, ARFIP2, AP2M1, RAB8A, TESC, ITGA2, SLC6A14, RRAS2, APOA1, DKK1, F5, SLC7A5, PLSCR1, ADAM15, TRAF6, EXOC4, PKP4, TLCD1, C9ORF3, RAF1, CD46, STX1A, SHANK2, VAMP2, SRC, TNFRSF11A, TFPI, TMEM25, RIC8A, SDCBP, RAB23, NCR3LG1, FADD, PROM1, CAMK2G, HSPA8, TGFB1, DAB2IP, RANBP9, SORBS1, MERTK, UBAC1, PPP5C, AXL, CD7, SPRY2, UBAP1, FAS, STUB1, ESAM, TAB2, LAMTOR1, PTPN2, BCAR1, BMPR1A |
|--|-------------------------------------------|------------|-----------------|----------|-----------------------------------------------------------------------------------------------------------------------------------------------------------------------------------------------------------------------------------------------------------------------------------------------------------------------------------------------------------------------------------------------------------------------------------------------------------------------------------|

|  |                                           |            |                     |          |                                                         |
|--|-------------------------------------------|------------|---------------------|----------|---------------------------------------------------------|
|  | <b>GO Term<br/>Biological<br/>Process</b> | GO:0042593 | glucose homeostasis | 1.26E-04 | CEBPA, STK11, PRKAA1, IRS1, PAX6,<br>HNF1A, SOX4, PTPN2 |
|--|-------------------------------------------|------------|---------------------|----------|---------------------------------------------------------|

|  |                                           |            |           |          |                                                                                                                                                                                                                                                                                                                                                                                                                                                                                                                                                                          |
|--|-------------------------------------------|------------|-----------|----------|--------------------------------------------------------------------------------------------------------------------------------------------------------------------------------------------------------------------------------------------------------------------------------------------------------------------------------------------------------------------------------------------------------------------------------------------------------------------------------------------------------------------------------------------------------------------------|
|  | <b>GO Term<br/>Cellular<br/>Component</b> | GO:0005737 | cytoplasm | 1.30E-04 | CYFIP2, NCF2, IRS1, ARPC5L, MTR, GPHN, ETS2, LGALS3, STK11, NUDCD1, HERC1, GPER1, SUFU, MLST8, TRIM25, FBXO3, ARFIP2, OSTF1, SOX4, SH3GL1, BCAS3, DNAAF2, TESC, VPS33B, MUL1, PAX6, HNF1A, ZDHHC17, TOM1L1, SLC7A5, TRAF6, RBP1, RARA, EXOC4, PKP4, C9ORF3, RAF1, ATF5, PFN1, ZFPM1, SHANK2, ARL8B, PRKAA1, PDXK, SRC, NEDD9, BPHL, EVPL, GLIS2, RIC8A, PPP2CB, SDCBP, RAB23, PACSIN2, STOM, FADD, EIF4E, UVRAG, TGFB1, ZBTB14, DAB2IP, HIP1R, RANBP9, SORBS1, MERTK, UBAC1, AGT, HIPK2, PRRC2A, PPP5C, AGO2, RPS6KB2, PDCL, AGGF1, UBAP1, FAS, STUB1, NES, BCAR1, MON1B |
|--|-------------------------------------------|------------|-----------|----------|--------------------------------------------------------------------------------------------------------------------------------------------------------------------------------------------------------------------------------------------------------------------------------------------------------------------------------------------------------------------------------------------------------------------------------------------------------------------------------------------------------------------------------------------------------------------------|

|                                           |            |                                                                         |          |                                                                                                                                                  |
|-------------------------------------------|------------|-------------------------------------------------------------------------|----------|--------------------------------------------------------------------------------------------------------------------------------------------------|
| <b>GO Term<br/>Biological<br/>Process</b> | GO:0000122 | negative regulation of transcription<br>from RNA polymerase II promoter | 1.37E-04 | CEBPA, TGFB1, ZBTB14, EPO, GFI1, DAB2IP,<br>PAX6, HNF1A, DKK1, ETS2, HIPK2, SAP30,<br>GLIS2, SOX18, SUFU, TRAF6, ID1, RARA,<br>CIC, ZFPM1, PTPN2 |
| <b>GO Term<br/>Biological<br/>Process</b> | GO:0032940 | secretion by cell                                                       | 1.49E-04 | SERPINE2, AXL, MERTK, STX1A                                                                                                                      |
| <b>GO Term<br/>Biological<br/>Process</b> | GO:0010628 | positive regulation of gene<br>expression                               | 1.59E-04 | PRKAA1, PLSCR1, TGFB1, GPER1, TESC, ID1,<br>SPRY2, PAX6, PIK3CB, CD46, ZBTB7B, NKX3-<br>1                                                        |
| <b>GO Term<br/>Cellular<br/>Component</b> | GO:0005913 | cell-cell adherens junction                                             | 1.68E-04 | HSPA8, SRC, DAB2IP, SORBS1, F11R, EVPL,<br>SDCBP, FLOT1, PACSIN2, TRIM25, ARFIP2,<br>PFN1, SH3GL1                                                |
| <b>GO Term<br/>Biological<br/>Process</b> | GO:0030168 | platelet activation                                                     | 2.83E-04 | PLSCR1, SRC, AXL, DGKA, PIK3CB, RAF1,<br>MERTK, F5                                                                                               |

|  |                                           |            |                                                                                                                        |          |                                                                                                        |
|--|-------------------------------------------|------------|------------------------------------------------------------------------------------------------------------------------|----------|--------------------------------------------------------------------------------------------------------|
|  | <b>GO Term<br/>Molecular<br/>Function</b> | GO:0001077 | transcriptional activator activity,<br>RNA polymerase II core promoter<br>proximal region sequence-specific<br>binding | 2.95E-04 | CEBPA, PLSCR1, SOX18, ONECUT1, PAX6,<br>SOX9, HNF1A, ZBTB7B, ETV4, SOX4, GLIS2                         |
|  | <b>GO Term<br/>Molecular<br/>Function</b> | GO:0019899 | enzyme binding                                                                                                         | 3.32E-04 | HSPA8, TGFB1, GLDC, SRC, RANBP9,<br>APOA1, MAT2B, NR5A1, PLSCR1, RARA,<br>STUB1, RAF1, EIF4E           |
|  | <b>GO Term<br/>Molecular<br/>Function</b> | GO:0017124 | SH3 domain binding                                                                                                     | 3.49E-04 | TOM1L1, UVRAG, PLSCR1, ADAM15,<br>DAB2IP, OSTF1, BCAR1, SHANK2                                         |
|  | <b>GO Term<br/>Biological<br/>Process</b> | GO:0008285 | negative regulation of cell<br>proliferation                                                                           | 4.58E-04 | CEBPA, TGFB1, SERPINE2, TESC, DAB2IP,<br>STK11, GPER1, RARA, SPRY2, RAF1, ATF5,<br>SOX4, PTPN2, NKX3-1 |
|  | <b>GO Term<br/>Biological<br/>Process</b> | GO:0007179 | transforming growth factor beta<br>receptor signaling pathway                                                          | 5.37E-04 | TGFB1, SRC, ID1, APOA1, F11R, BMPR1A,<br>HIPK2                                                         |

|                                   |            |                                                               |            |                                                                                                    |
|-----------------------------------|------------|---------------------------------------------------------------|------------|----------------------------------------------------------------------------------------------------|
| <b>KEGG Pathway</b>               | hsa04151   | PI3K-Akt signaling pathway                                    | 7.62E-04   | LAMA5, PRKAA1, EPO, IRS1, ITGA2, PIK3CB, PPP2CB, STK11, RPS6KB2, SPP1, MLST8, RAF1, EIF4E, SGK2    |
| <b>GO Term Biological Process</b> | GO:0071260 | cellular response to mechanical stimulus                      | 0.001112   | TGFB1, ITGA2, FAS, FADD, SOX9, AGT                                                                 |
| <b>GO Term Biological Process</b> | GO:0048015 | phosphatidylinositol-mediated signaling                       | 0.00113095 | IRS1, AGO2, MLST8, PIK3C3, RICTOR, PIK3CB, TNRC6A                                                  |
| <b>GO Term Biological Process</b> | GO:0048010 | vascular endothelial growth factor receptor signaling pathway | 0.00118447 | CYFIP2, NCF2, SRC, AXL, PIK3CB, BCAR1                                                              |
| <b>GO Term Biological Process</b> | GO:0034260 | negative regulation of GTPase activity                        | 0.00125831 | BCAS3, RTKN, DAB2IP, SPRY2, F11R                                                                   |
| <b>GO Term Biological Process</b> | GO:0045892 | negative regulation of transcription, DNA-templated           | 0.0012911  | HSPA8, CEBPA, TGFB1, ZBTB14, SRC, GFI1, DAB2IP, GLIS2, SOX18, TRAF6, ID1, RARA, SOX9, ATF5, NKX3-1 |
| <b>GO Term Molecular Function</b> | GO:0098641 | cadherin binding involved in cell-cell adhesion               | 0.001442   | HSPA8, SDCBP, SRC, DAB2IP, PACSIN2, TRIM25, ARFIP2, PFN1, F11R, EVPL, SH3GL1                       |

|  |                                           |            |                                                          |            |                                                                                                                                                                              |
|--|-------------------------------------------|------------|----------------------------------------------------------|------------|------------------------------------------------------------------------------------------------------------------------------------------------------------------------------|
|  | <b>GO Term<br/>Biological<br/>Process</b> | GO:0032147 | activation of protein kinase activity                    | 0.00149342 | TOM1L1, STK11, EPO, TRAF6, NKX3-1                                                                                                                                            |
|  | <b>GO Term<br/>Biological<br/>Process</b> | GO:0071222 | cellular response to lipopolysaccharide                  | 0.00157241 | SRC, AXL, GF11, TRAF6, DAB2IP, RARA, TFPI                                                                                                                                    |
|  | <b>GO Term<br/>Molecular<br/>Function</b> | GO:0004871 | signal transducer activity                               | 0.00193641 | PPP5C, TRAF3, IRS1, SUFU, FAS, MUL1, ZDHHC17, DKK1, BCAR1                                                                                                                    |
|  | <b>GO Term<br/>Biological<br/>Process</b> | GO:0050731 | positive regulation of peptidyl-tyrosine phosphorylation | 0.00211465 | STK11, TGFB1, SRC, MLST8, RICTOR, AGT                                                                                                                                        |
|  | <b>GO Term<br/>Biological<br/>Process</b> | GO:0007165 | signal transduction                                      | 0.00213841 | BCAR3, LGALS3BP, PRKAA1, RTKN, EPO, IRS1, SRC, NEDD9, TNFRSF11A, PIK3CB, SUFU, FADD, SOX9, OSTF1, SH3GL1, CHRN1, ZDHHC17, TOM1L1, TRAF3, AXL, RPS6KB2, RARA, PDCL, FAS, RAF1 |
|  | <b>KEGG Pathway</b>                       | hsa04810   | Regulation of actin cytoskeleton                         | 0.00217939 | CYFIP2, SRC, ITGA2, ARPC5L, RRAS2, PIK3CB, PIP4K2C, PFN1, RAF1, BCAR1                                                                                                        |

|                                           |            |                                     |            |                                                                                                             |
|-------------------------------------------|------------|-------------------------------------|------------|-------------------------------------------------------------------------------------------------------------|
| <b>GO Term<br/>Biological<br/>Process</b> | GO:0050900 | leukocyte migration                 | 0.00231956 | SLC7A5, SRC, PROS1, ESAM, PIK3CB, F11R, MERTK                                                               |
| <b>KEGG Pathway</b>                       | hsa04610   | Complement and coagulation cascades | 0.00241456 | CFD, CPB2, PROS1, CD46, TFPI, F5                                                                            |
| <b>GO Term<br/>Cellular<br/>Component</b> | GO:0048471 | perinuclear region of cytoplasm     | 0.0024623  | CYFIP2, SRC, ITGA2, VPS33B, HIP1R, GPER1, TRAF6, GOLGA1, SPP1, VTI1A, RARA, AGGF1, STOM, PKP4, EIF4E, VAMP2 |
| <b>GO Term<br/>Biological<br/>Process</b> | GO:0042981 | regulation of apoptotic process     | 0.00252828 | TGFB1, TRAF3, FAS, FADD, SOX9, TNFRSF11A, RAF1, SGK2, BCAR1                                                 |
| <b>GO Term<br/>Biological<br/>Process</b> | GO:0018105 | peptidyl-serine phosphorylation     | 0.00261995 | MORC3, EPO, SRC, RICTOR, SGK2, HIPK2, UHMK1                                                                 |
| <b>KEGG Pathway</b>                       | hsa04910   | Insulin signaling pathway           | 0.00269082 | PRKAA1, IRS1, RPS6KB2, FLOT1, SORBS1, PIK3CB, RAF1, EIF4E                                                   |
| <b>GO Term<br/>Biological<br/>Process</b> | GO:0031018 | endocrine pancreas development      | 0.00283855 | ONECUT1, SOX9, HNF1A, SOX4                                                                                  |
| <b>GO Term<br/>Molecular<br/>Function</b> | GO:0030295 | protein kinase activator activity   | 0.00283959 | TOM1L1, STK11, EPO, NKX3-1                                                                                  |



|                                           |            |                                                      |            |                                                                                      |
|-------------------------------------------|------------|------------------------------------------------------|------------|--------------------------------------------------------------------------------------|
| <b>GO Term<br/>Cellular<br/>Component</b> | GO:0005925 | focal adhesion                                       | 0.00294828 | HSPA8, SDCBP, ITGA2, ARPC5L, FLOT1, PACSIN2, RRAS2, NEDD9, SORBS1, PFN1, CD46, BCAR1 |
| <b>GO Term<br/>Biological<br/>Process</b> | GO:0098609 | cell-cell adhesion                                   | 0.00317127 | HSPA8, SDCBP, DAB2IP, PACSIN2, TRIM25, ARFIP2, PFN1, F11R, EVPL, SH3GL1              |
| <b>GO Term<br/>Biological<br/>Process</b> | GO:0050680 | negative regulation of epithelial cell proliferation | 0.00335173 | TGFB1, DAB2IP, PAX6, SOX9, NKX3-1                                                    |
| <b>GO Term<br/>Biological<br/>Process</b> | GO:0070373 | negative regulation of ERK1 and ERK2 cascade         | 0.00380636 | GPER1, DAB2IP, RANBP9, SPRY2, PTPN2                                                  |
| <b>GO Term<br/>Biological<br/>Process</b> | GO:0008584 | male gonad development                               | 0.00382756 | NR5A1, PRDX4, ADAM15, TESC, SOX9, NKX3-1                                             |
| <b>GO Term<br/>Biological<br/>Process</b> | GO:0050821 | protein stabilization                                | 0.00397595 | MORC3, TESC, HIP1R, MUL1, APOA1, PFN1, SOX4                                          |
| <b>GO Term<br/>Biological<br/>Process</b> | GO:0060627 | regulation of vesicle-mediated transport             | 0.00413048 | UVRAG, PRKAA1, VAMP2                                                                 |
| <b>GO Term<br/>Molecular<br/>Function</b> | GO:0047485 | protein N-terminus binding                           | 0.00437962 | SDCBP, TGFB1, TRAF6, ID1, EXOC4, STX1A                                               |

|                                           |            |                                                  |            |                                                                                     |
|-------------------------------------------|------------|--------------------------------------------------|------------|-------------------------------------------------------------------------------------|
| <b>GO Term<br/>Cellular<br/>Component</b> | GO:0005901 | caveola                                          | 0.00490035 | IRS1, SRC, FLOT1, PACSIN2, BMPR1A                                                   |
| <b>GO Term<br/>Biological<br/>Process</b> | GO:0043534 | blood vessel endothelial cell migration          | 0.00512582 | SOX18, ID1, APOA1                                                                   |
| <b>GO Term<br/>Biological<br/>Process</b> | GO:0016337 | single organismal cell-cell adhesion             | 0.00519388 | CYFIP2, SRC, PKP4, ESAM, SOX9, MPZL2                                                |
| <b>GO Term<br/>Molecular<br/>Function</b> | GO:0046982 | protein heterodimerization activity              | 0.00551704 | TGFB1, ITGA2, HNF1A, PANX1, SDCBP, SOX18, AXL, FLOT1, RARA, SOX9, RAF1, SOX4, STX1A |
| <b>GO Term<br/>Biological<br/>Process</b> | GO:0010634 | positive regulation of epithelial cell migration | 0.00563005 | SRC, ITGA2, SOX9, PFN1                                                              |
| <b>GO Term<br/>Biological<br/>Process</b> | GO:0070555 | response to interleukin-1                        | 0.00563005 | EPO, SRC, TRAF6, TNFRSF11A                                                          |
| <b>GO Term<br/>Biological<br/>Process</b> | GO:0002576 | platelet degranulation                           | 0.00564042 | LGALS3BP, CFD, TGFB1, PROS1, APOA1, F5                                              |
| <b>GO Term<br/>Cellular<br/>Component</b> | GO:0044798 | nuclear transcription factor complex             | 0.00570506 | SOX18, SOX9, SOX4                                                                   |

|  |                                   |            |                                          |            |                                                                                                           |
|--|-----------------------------------|------------|------------------------------------------|------------|-----------------------------------------------------------------------------------------------------------|
|  | <b>KEGG Pathway</b>               | hsa05205   | Proteoglycans in cancer                  | 0.00581863 | TGFB1, SRC, ITGA2, RPS6KB2, RRAS2, FAS, PIK3CB, RAF1, CAMK2G                                              |
|  | <b>GO Term Cellular Component</b> | GO:0005856 | cytoskeleton                             | 0.00610518 | SDCBP, TOR1A, HIP1R, PACSIN2, STOM, SPRY2, PKP4, PFN1, EVPL, GPHN, MPZL2                                  |
|  | <b>GO Term Molecular Function</b> | GO:0005178 | integrin binding                         | 0.0061171  | LAMA5, COL16A1, ADAM15, SRC, ITGA2, PTPN2                                                                 |
|  | <b>GO Term Biological Process</b> | GO:0043065 | positive regulation of apoptotic process | 0.00613628 | TGFB1, SRC, GPER1, TRAF6, DAB2IP, HIP1R, FAS, FADD, SOX4, NGEF                                            |
|  | <b>GO Term Cellular Component</b> | GO:0045121 | membrane raft                            | 0.00628098 | SDCBP, PLSCR1, FLOT1, FAS, STOM, FADD, SORBS1, LAMTOR1                                                    |
|  | <b>GO Term Cellular Component</b> | GO:0043231 | intracellular membrane-bounded organelle | 0.00634239 | IRS1, HIP1R, HSPA13, BPHL, ZDHHC17, PRRC2A, SLC7A5, PPP5C, GOLGA1, PACSIN2, LAMTOR1, PROM1, VAMP2, TNRC6A |

|  |                                   |            |                                                                           |            |                                                                                       |
|--|-----------------------------------|------------|---------------------------------------------------------------------------|------------|---------------------------------------------------------------------------------------|
|  | <b>KEGG Pathway</b>               | hsa04152   | AMPK signaling pathway                                                    | 0.00654154 | PPP2CB, STK11, PRKAA1, IRS1, RPS6KB2, PIK3CB, RAB8A                                   |
|  | <b>GO Term Biological Process</b> | GO:0071902 | positive regulation of protein serine/threonine kinase activity           | 0.00664613 | STK11, SRC, DAB2IP, SPRY2                                                             |
|  | <b>GO Term Biological Process</b> | GO:0016192 | vesicle-mediated transport                                                | 0.00686345 | AP4M1, BCAS3, VPS33B, STX1A, AP2M1, VAMP2, MON1B                                      |
|  | <b>KEGG Pathway</b>               | hsa05200   | Pathways in cancer                                                        | 0.00691859 | LAMA5, CEBPA, TGFB1, ITGA2, PIK3CB, TRAF3, SUFU, TRAF6, RARA, FAS, FADD, RAF1, NKX3-1 |
|  | <b>KEGG Pathway</b>               | hsa05221   | Acute myeloid leukemia                                                    | 0.00698314 | CEBPA, RPS6KB2, RARA, PIK3CB, RAF1                                                    |
|  | <b>GO Term Biological Process</b> | GO:0042059 | negative regulation of epidermal growth factor receptor signaling pathway | 0.00719235 | DAB2IP, SPRY2, AP2M1, PTPN2                                                           |
|  | <b>GO Term Biological Process</b> | GO:0001944 | vasculature development                                                   | 0.00740982 | RIC8A, STK11, SOX18                                                                   |

|  |                                           |            |                                                |            |                                                                                                                                    |
|--|-------------------------------------------|------------|------------------------------------------------|------------|------------------------------------------------------------------------------------------------------------------------------------|
|  | <b>GO Term<br/>Biological<br/>Process</b> | GO:0045087 | innate immune response                         | 0.00824553 | LGALS3, ADAM15, NCF2, TRAF3, SRC, AXL,<br>GPER1, DAB2IP, TRIM25, FADD, CD46,<br>MSRB1                                              |
|  | <b>GO Term<br/>Biological<br/>Process</b> | GO:0034446 | substrate adhesion-dependent cell<br>spreading | 0.00836261 | LAMA5, SRC, AXL, MERTK                                                                                                             |
|  | <b>GO Term<br/>Biological<br/>Process</b> | GO:0001942 | hair follicle development                      | 0.00836261 | LAMA5, SOX18, SOX9, DKK1                                                                                                           |
|  | <b>GO Term<br/>Biological<br/>Process</b> | GO:0007398 | ectoderm development                           | 0.00869399 | ZBTB17, ZBTB7B, BMPR1A                                                                                                             |
|  | <b>GO Term<br/>Biological<br/>Process</b> | GO:0051457 | maintenance of protein location in<br>nucleus  | 0.00869399 | NR5A1, MORC3, TOPORS                                                                                                               |
|  | <b>GO Term<br/>Molecular<br/>Function</b> | GO:0042802 | identical protein binding                      | 0.00877864 | NAB2, DAB2IP, MUL1, APOA1, ZDHHC17,<br>CLDN6, SDCBP, PPP5C, TRIM39, TRAF6,<br>PACSIN2, FAS, ARFIP2, FADD, PIP4K2C,<br>RAF1, SH3GL1 |

|                                           |            |                                                            |            |                                                                                    |
|-------------------------------------------|------------|------------------------------------------------------------|------------|------------------------------------------------------------------------------------|
| <b>GO Term<br/>Molecular<br/>Function</b> | GO:0019901 | protein kinase binding                                     | 0.00898384 | TOM1L1, TRAF3, SUFU, TRAF6, DAB2IP, SPRY2, PAX6, RICTOR, RAB8A, PTPN2, BCAR1       |
| <b>GO Term<br/>Biological<br/>Process</b> | GO:0043123 | positive regulation of I-kappaB kinase/NF-kappaB signaling | 0.00899884 | PPP5C, TRAF6, TRIM25, MUL1, TAB2, FADD, ZDHHC17                                    |
| <b>GO Term<br/>Molecular<br/>Function</b> | GO:0044212 | transcription regulatory region DNA binding                | 0.00943173 | CEBPA, ZBTB14, SOX18, GFI1, HNF1A, ATF5, GLIS2, NKX3-1                             |
| <b>GO Term<br/>Cellular<br/>Component</b> | GO:0030054 | cell junction                                              | 0.0095807  | CYFIP2, CHRN1, PRR7, TOR1A, GPER1, PKP4, F11R, ZDHHC17, GPHN, STX1A, VAMP2, SHANK2 |
| <b>GO Term<br/>Biological<br/>Process</b> | GO:0010508 | positive regulation of autophagy                           | 0.00963834 | UVRAG, STK11, PRKAA1, PIK3CB                                                       |
| <b>GO Term<br/>Biological<br/>Process</b> | GO:0030218 | erythrocyte differentiation                                | 0.00963834 | EPO, ZFPM1, PTPN2, HIPK2                                                           |
| <b>KEGG Pathway</b>                       | hsa04068   | FoxO signaling pathway                                     | 0.00980777 | STK11, PRKAA1, TGFB1, IRS1, PIK3CB, RAF1, SGK2                                     |

|  |                                           |            |                                                          |            |                                                         |
|--|-------------------------------------------|------------|----------------------------------------------------------|------------|---------------------------------------------------------|
|  | <b>GO Term<br/>Biological<br/>Process</b> | GO:0032869 | cellular response to insulin stimulus                    | 0.01033473 | IRS1, SRC, SORBS1, RAB8A, VAMP2                         |
|  | <b>GO Term<br/>Biological<br/>Process</b> | GO:0001843 | neural tube closure                                      | 0.01033473 | TGFB1, SUFU, TRAF6, RARA, PFN1                          |
|  | <b>GO Term<br/>Biological<br/>Process</b> | GO:0030308 | negative regulation of cell growth                       | 0.01094225 | STK11, TGFB1, SERPINE2, ADAM15, MUL1, AGT               |
|  | <b>GO Term<br/>Cellular<br/>Component</b> | GO:0032587 | ruffle membrane                                          | 0.01103063 | SRC, TESC, HIP1R, PACSIN2, SPRY2                        |
|  | <b>GO Term<br/>Biological<br/>Process</b> | GO:0043277 | apoptotic cell clearance                                 | 0.01153569 | AXL, RARA, MERTK                                        |
|  | <b>GO Term<br/>Biological<br/>Process</b> | GO:0001503 | ossification                                             | 0.01177618 | TRAF6, SPP1, OSTF1, SOX9, TNFRSF11A                     |
|  | <b>GO Term<br/>Biological<br/>Process</b> | GO:0046718 | viral entry into host cell                               | 0.01177618 | UVRAG, AXL, ITGA2, F11R, CD46                           |
|  | <b>GO Term<br/>Biological<br/>Process</b> | GO:0001525 | angiogenesis                                             | 0.01191742 | LAMA5, BCAS3, ADAM15, SOX18, ID1, DAB2IP, AGGF1, HS6ST1 |
|  | <b>KEGG Pathway</b>                       | hsa04550   | Signaling pathways regulating pluripotency of stem cells | 0.01201301 | ID1, ONECUT1, PAX6, PIK3CB, HNF1A, RAF1, BMPR1A         |

|                                           |            |                                                                                        |            |                                                                                            |
|-------------------------------------------|------------|----------------------------------------------------------------------------------------|------------|--------------------------------------------------------------------------------------------|
| <b>GO Term<br/>Biological<br/>Process</b> | GO:0006468 | protein phosphorylation                                                                | 0.01241461 | STK11, PRKAA1, MORC3, TGFB1, RPS6KB2,<br>RARA, PIK3C3, RAF1, MERTK, SGK2,<br>BMPR1A, HIPK2 |
| <b>GO Term<br/>Cellular<br/>Component</b> | GO:0043005 | neuron projection                                                                      | 0.01302665 | CYFIP2, SRC, FAS, FADD, PFN1, STX1A,<br>VAMP2, SHANK2                                      |
| <b>GO Term<br/>Biological<br/>Process</b> | GO:0048011 | neurotrophin TRK receptor<br>signaling pathway                                         | 0.01308894 | SRC, RAF1, BCAR1                                                                           |
| <b>GO Term<br/>Biological<br/>Process</b> | GO:0032418 | lysosome localization                                                                  | 0.01308894 | VPS33B, LAMTOR1, ARL8B                                                                     |
| <b>GO Term<br/>Biological<br/>Process</b> | GO:0006919 | activation of cysteine-type<br>endopeptidase activity involved in<br>apoptotic process | 0.01334079 | HIP1R, FAS, MUL1, FADD, NKX3-1                                                             |
| <b>GO Term<br/>Cellular<br/>Component</b> | GO:0014069 | postsynaptic density                                                                   | 0.0134235  | SRC, GPER1, HIP1R, PKP4, CAMK2G,<br>RAB8A, SHANK2                                          |
| <b>GO Term<br/>Cellular<br/>Component</b> | GO:0031012 | extracellular matrix                                                                   | 0.0134369  | LGALS3BP, HSPA8, LGALS3, LAMA5,<br>PLSCR1, TGFB1, SERPINE2, NES, RAB8A                     |



|                                           |            |                                                                                |            |                                                                                    |
|-------------------------------------------|------------|--------------------------------------------------------------------------------|------------|------------------------------------------------------------------------------------|
| <b>GO Term<br/>Molecular<br/>Function</b> | GO:0008134 | transcription factor binding                                                   | 0.01359587 | CEBPA, BCAS3, SUFU, ID1, NAB2, RARA, PAX6, ZFPM1, NKX3-1                           |
| <b>KEGG Pathway</b>                       | hsa05142   | Chagas disease (American trypanosomiasis)                                      | 0.01360992 | PPP2CB, TGFB1, TRAF6, FAS, FADD, PIK3CB                                            |
| <b>GO Term<br/>Biological<br/>Process</b> | GO:0051897 | positive regulation of protein kinase B signaling                              | 0.01389029 | TGFB1, SRC, AXL, SPRY2, RICTOR                                                     |
| <b>GO Term<br/>Molecular<br/>Function</b> | GO:0000149 | SNARE binding                                                                  | 0.01411986 | UVRAG, VTI1A, STX1A, VAMP2                                                         |
| <b>GO Term<br/>Biological<br/>Process</b> | GO:0008284 | positive regulation of cell proliferation                                      | 0.0143883  | SDCBP, PRKAA1, TGFB1, IRS1, EPO, GPER1, RARA, SOX9, TNFRSF11A, SOX4, HIPK2, NKX3-1 |
| <b>KEGG Pathway</b>                       | hsa04620   | Toll-like receptor signaling pathway                                           | 0.01468338 | TRAF3, TRAF6, SPP1, TAB2, FADD, PIK3CB                                             |
| <b>GO Term<br/>Biological<br/>Process</b> | GO:0048535 | lymph node development                                                         | 0.01472767 | TGFB1, FADD, TNFRSF11A                                                             |
| <b>GO Term<br/>Biological<br/>Process</b> | GO:1902041 | regulation of extrinsic apoptotic signaling pathway via death domain receptors | 0.01472767 | LGALS3, FAS, FADD                                                                  |

|                                           |            |                                                                |            |                                               |
|-------------------------------------------|------------|----------------------------------------------------------------|------------|-----------------------------------------------|
| <b>GO Term<br/>Molecular<br/>Function</b> | GO:0008022 | protein C-terminus binding                                     | 0.01567183 | SDCBP, PPP2CB, PRKAA1, NCF2, SRC, ID1, AGO2   |
| <b>GO Term<br/>Cellular<br/>Component</b> | GO:1903561 | extracellular vesicle                                          | 0.01569962 | SDCBP, SERPINE2, APOA1, F5                    |
| <b>GO Term<br/>Biological<br/>Process</b> | GO:0051092 | positive regulation of NF-kappaB transcription factor activity | 0.01593499 | TGFB1, TRAF6, TRIM25, TAB2, TNFRSF11A, AGT    |
| <b>GO Term<br/>Biological<br/>Process</b> | GO:0007507 | heart development                                              | 0.0161555  | TGFB1, ID1, TAB2, RAF1, ZFPM1, SOX4, NKX3-1   |
| <b>GO Term<br/>Cellular<br/>Component</b> | GO:0008021 | synaptic vesicle                                               | 0.01625673 | TOR1A, VTI1A, STX1A, RAB8A, VAMP2             |
| <b>GO Term<br/>Biological<br/>Process</b> | GO:0033280 | response to vitamin D                                          | 0.01644983 | TGFB1, SPP1, TRIM25                           |
| <b>GO Term<br/>Biological<br/>Process</b> | GO:0033189 | response to vitamin A                                          | 0.01644983 | EPO, RBP1, RARA                               |
| <b>GO Term<br/>Biological<br/>Process</b> | GO:0007596 | blood coagulation                                              | 0.01655609 | CPB2, SERPINE2, ITGA2, PROS1, TFPI, ZFPM1, F5 |
| <b>GO Term<br/>Biological<br/>Process</b> | GO:0007565 | female pregnancy                                               | 0.01685269 | TGFB1, COL16A1, ITGA2, RARA, AGT              |
| <b>GO Term<br/>Biological<br/>Process</b> | GO:0042127 | regulation of cell proliferation                               | 0.01696084 | LAMA5, SRC, FAS, SOX9, SGK2, TOPORS, AGT      |

|  |                                           |            |                                                                         |            |                                                                |
|--|-------------------------------------------|------------|-------------------------------------------------------------------------|------------|----------------------------------------------------------------|
|  | <b>GO Term<br/>Cellular<br/>Component</b> | GO:0045111 | intermediate filament cytoskeleton                                      | 0.0174343  | BCAS3, STUB1, NES, EVPL                                        |
|  | <b>GO Term<br/>Cellular<br/>Component</b> | GO:0001750 | photoreceptor outer segment                                             | 0.0174343  | HNF1A, PROM1, MERTK, SHANK2                                    |
|  | <b>GO Term<br/>Molecular<br/>Function</b> | GO:0016301 | kinase activity                                                         | 0.01758181 | STK11, SRC, DGKA, PACSIN2, PIK3C3, TAB2, PIK3CB, RAF1          |
|  | <b>GO Term<br/>Biological<br/>Process</b> | GO:0045879 | negative regulation of smoothened signaling pathway                     | 0.0182534  | SERPINE2, SUFU, GLIS2                                          |
|  | <b>GO Term<br/>Biological<br/>Process</b> | GO:0090190 | positive regulation of branching involved in ureteric bud morphogenesis | 0.0182534  | TGFB1, SOX9, AGT                                               |
|  | <b>GO Term<br/>Molecular<br/>Function</b> | GO:0043548 | phosphatidylinositol 3-kinase binding                                   | 0.01825739 | IRS1, AXL, DAB2IP                                              |
|  | <b>GO Term<br/>Cellular<br/>Component</b> | GO:0043025 | neuronal cell body                                                      | 0.0187927  | TGFB1, DAB2IP, VTI1A, HIP1R, RARA, MUL1, RAB8A, SHANK2, BMPR1A |
|  | <b>GO Term<br/>Biological<br/>Process</b> | GO:0007050 | cell cycle arrest                                                       | 0.01999412 | STK11, PRKAA1, TGFB1, MLST8, LAMTOR1, UHMK1                    |
|  | <b>KEGG Pathway</b>                       | hsa04670   | Leukocyte transendothelial migration                                    | 0.02021782 | CLDN6, NCF2, ESAM, PIK3CB, F11R, BCAR1                         |

|                                           |            |                                                        |            |                                                |
|-------------------------------------------|------------|--------------------------------------------------------|------------|------------------------------------------------|
| <b>GO Term<br/>Cellular<br/>Component</b> | GO:0031093 | platelet alpha granule lumen                           | 0.02022904 | CFD, TGFB1, PROS1, F5                          |
| <b>GO Term<br/>Biological<br/>Process</b> | GO:0030198 | extracellular matrix organization                      | 0.02158625 | LAMA5, PRDX4, COL16A1, ITGA2, SPP1, SOX9, F11R |
| <b>GO Term<br/>Biological<br/>Process</b> | GO:0097049 | motor neuron apoptotic process                         | 0.02191357 | FAS, FADD                                      |
| <b>GO Term<br/>Biological<br/>Process</b> | GO:0046967 | cytosol to ER transport                                | 0.02191357 | TAP2, TAP1                                     |
| <b>GO Term<br/>Biological<br/>Process</b> | GO:0030852 | regulation of granulocyte differentiation              | 0.02191357 | RBP1, RARA                                     |
| <b>KEGG Pathway</b>                       | hsa00450   | Selenocompound metabolism                              | 0.02198991 | TXNRD3, MTR, PAPSS1                            |
| <b>GO Term<br/>Biological<br/>Process</b> | GO:1900182 | positive regulation of protein localization to nucleus | 0.02209687 | STK11, SRC, GLIS2                              |
| <b>GO Term<br/>Cellular<br/>Component</b> | GO:0031902 | late endosome membrane                                 | 0.0220981  | VPS33B, VTI1A, LAMTOR1, SLC29A3, ARL8B         |
| <b>GO Term<br/>Cellular<br/>Component</b> | GO:0030136 | clathrin-coated vesicle                                | 0.02325584 | VPS33B, VTI1A, HIP1R, VAMP2                    |
| <b>GO Term<br/>Biological<br/>Process</b> | GO:0007173 | epidermal growth factor receptor signaling pathway     | 0.02380344 | TGFB1, SRC, SOX9, BCAR1                        |

|                                           |            |                                               |            |                                                                                                                                                     |
|-------------------------------------------|------------|-----------------------------------------------|------------|-----------------------------------------------------------------------------------------------------------------------------------------------------|
| <b>GO Term<br/>Biological<br/>Process</b> | GO:0045453 | bone resorption                               | 0.0241329  | SRC, TRAF6, HNF1A                                                                                                                                   |
| <b>GO Term<br/>Biological<br/>Process</b> | GO:0010842 | retina layer formation                        | 0.0241329  | PROM1, TOPORS, HIPK2                                                                                                                                |
| <b>GO Term<br/>Biological<br/>Process</b> | GO:0032091 | negative regulation of protein binding        | 0.02492729 | STUB1, ZFPM1, NES, DKK1                                                                                                                             |
| <b>GO Term<br/>Molecular<br/>Function</b> | GO:0008289 | lipid binding                                 | 0.02614999 | PPP5C, RBP1, PACSIN2, APOA1, AP2M1, SH3GL1                                                                                                          |
| <b>GO Term<br/>Cellular<br/>Component</b> | GO:0005615 | extracellular space                           | 0.02673206 | CFD, LGALS3BP, LAMA5, HSPA8, CPB2, TGFB1, SERPINE2, EPO, PROS1, HP, APOA1, TFPI, MERTK, DKK1, AGT, F5, SDCBP, LGALS3, PRDX4, AXL, SPP1, STOM, PROM1 |
| <b>GO Term<br/>Biological<br/>Process</b> | GO:0006366 | transcription from RNA polymerase II promoter | 0.0269782  | NR5A1, CEBPA, PLSCR1, ONECUT1, PAX6, SOX9, HNF1A, ZBTB7B, ATF5, ETV4, SOX4, GLIS2                                                                   |
| <b>KEGG Pathway</b>                       | hsa04350   | TGF-beta signaling pathway                    | 0.02751185 | PPP2CB, TGFB1, ID1, RPS6KB2, BMPR1A                                                                                                                 |

|                                           |            |                                                                                   |            |                                                                     |
|-------------------------------------------|------------|-----------------------------------------------------------------------------------|------------|---------------------------------------------------------------------|
| <b>GO Term<br/>Cellular<br/>Component</b> | GO:0000922 | spindle pole                                                                      | 0.02824185 | PPP2CB, NEDD9, PKP4, RMDN1, TOPORS                                  |
| <b>GO Term<br/>Biological<br/>Process</b> | GO:0030511 | positive regulation of transforming growth factor beta receptor signaling pathway | 0.02842416 | SDCBP, STK11, HIPK2                                                 |
| <b>GO Term<br/>Biological<br/>Process</b> | GO:0045742 | positive regulation of epidermal growth factor receptor signaling pathway         | 0.02842416 | GPER1, HIP1R, AGT                                                   |
| <b>GO Term<br/>Biological<br/>Process</b> | GO:0070371 | ERK1 and ERK2 cascade                                                             | 0.02842416 | APOA1, SOX9, AGT                                                    |
| <b>GO Term<br/>Biological<br/>Process</b> | GO:0048041 | focal adhesion assembly                                                           | 0.02842416 | LAMA5, ITGA2, SORBS1                                                |
| <b>GO Term<br/>Biological<br/>Process</b> | GO:0050679 | positive regulation of epithelial cell proliferation                              | 0.0284679  | TGFB1, ID1, SOX9, BMPR1A                                            |
| <b>KEGG Pathway</b>                       | hsa05222   | Small cell lung cancer                                                            | 0.02857709 | LAMA5, TRAF3, TRAF6, ITGA2, PIK3CB                                  |
| <b>GO Term<br/>Biological<br/>Process</b> | GO:0043066 | negative regulation of apoptotic process                                          | 0.02953355 | PRKAA1, SRC, TRAF6, ID1, RARA, FAS, SPRY2, SOX9, RAF1, ATF5, TOPORS |

|                                           |            |                                                          |            |                                                               |
|-------------------------------------------|------------|----------------------------------------------------------|------------|---------------------------------------------------------------|
| <b>GO Term<br/>Molecular<br/>Function</b> | GO:0004842 | ubiquitin-protein transferase activity                   | 0.02965677 | HERC1, TRAF3, TRAF6, FBXO3, TRIM25, MUL1, STUB1, PAX6, TOPORS |
| <b>GO Term<br/>Biological<br/>Process</b> | GO:0001933 | negative regulation of protein phosphorylation           | 0.02970431 | PPP5C, TGFB1, DAB2IP, PAX6                                    |
| <b>GO Term<br/>Biological<br/>Process</b> | GO:2001235 | positive regulation of apoptotic signaling pathway       | 0.03067571 | TRIM39, DAB2IP, NKX3-1                                        |
| <b>GO Term<br/>Biological<br/>Process</b> | GO:0046580 | negative regulation of Ras protein signal transduction   | 0.03067571 | PPP2CB, DAB2IP, SPRY2                                         |
| <b>KEGG Pathway</b>                       | hsa04064   | NF-kappa B signaling pathway                             | 0.0307807  | TRAF3, TRAF6, TRIM25, TAB2, TNFRSF11A                         |
| <b>KEGG Pathway</b>                       | hsa04012   | ErbB signaling pathway                                   | 0.0307807  | SRC, RPS6KB2, PIK3CB, RAF1, CAMK2G                            |
| <b>GO Term<br/>Cellular<br/>Component</b> | GO:0005899 | insulin receptor complex                                 | 0.03127655 | IRS1, SORBS1                                                  |
| <b>GO Term<br/>Cellular<br/>Component</b> | GO:0042825 | TAP complex                                              | 0.03127655 | TAP2, TAP1                                                    |
| <b>GO Term<br/>Cellular<br/>Component</b> | GO:0070033 | synaptobrevin 2-SNAP-25-syntaxin-1a-complexin II complex | 0.03127655 | STX1A, VAMP2                                                  |

|                                           |            |                                                                   |            |                                                                                                      |
|-------------------------------------------|------------|-------------------------------------------------------------------|------------|------------------------------------------------------------------------------------------------------|
| <b>GO Term<br/>Molecular<br/>Function</b> | GO:0042803 | protein homodimerization activity                                 | 0.03142267 | CEBPA, PDXK, TGFB1, TESC, DAB2IP, HIP1R, TAP1, HNF1A, SDCBP, PRDX4, ID1, STOM, STUB1, CAMK2G, BMPR1A |
| <b>GO Term<br/>Biological<br/>Process</b> | GO:0030154 | cell differentiation                                              | 0.03229511 | NR5A1, LAMA5, SLC7A5, TXNRD3, ONECUT1, ZBTB7B, RAF1, CAMK2G, ETV4, ETS2, PRRC2A                      |
| <b>GO Term<br/>Biological<br/>Process</b> | GO:0003331 | positive regulation of extracellular matrix constituent secretion | 0.03269058 | CPB2, AGT                                                                                            |
| <b>GO Term<br/>Biological<br/>Process</b> | GO:0048858 | cell projection morphogenesis                                     | 0.03269058 | PACSIN2, NES                                                                                         |
| <b>GO Term<br/>Biological<br/>Process</b> | GO:0051250 | negative regulation of lymphocyte activation                      | 0.03269058 | AXL, MERTK                                                                                           |
| <b>GO Term<br/>Molecular<br/>Function</b> | GO:0015440 | peptide-transporting ATPase activity                              | 0.03269396 | TAP2, TAP1                                                                                           |
| <b>GO Term<br/>Molecular<br/>Function</b> | GO:0023029 | MHC class Ib protein binding                                      | 0.03269396 | TAP2, TAP1                                                                                           |



|                                           |            |                                                                      |            |                                                  |
|-------------------------------------------|------------|----------------------------------------------------------------------|------------|--------------------------------------------------|
| <b>GO Term<br/>Molecular<br/>Function</b> | GO:0015433 | peptide antigen-transporting<br>ATPase activity                      | 0.03269396 | TAP2, TAP1                                       |
| <b>GO Term<br/>Molecular<br/>Function</b> | GO:0015197 | peptide transporter activity                                         | 0.03269396 | TAP2, TAP1                                       |
| <b>GO Term<br/>Biological<br/>Process</b> | GO:2001238 | positive regulation of extrinsic<br>apoptotic signaling pathway      | 0.03299547 | GPB1, FADD, AGT                                  |
| <b>GO Term<br/>Biological<br/>Process</b> | GO:0006904 | vesicle docking involved in<br>exocytosis                            | 0.03299547 | VPS33B, EXOC4, RAB8A                             |
| <b>KEGG Pathway</b>                       | hsa04380   | Osteoclast differentiation                                           | 0.03312089 | TGFB1, NCF2, TRAF6, TAB2, TNFRSF11A,<br>PIK3CB   |
| <b>KEGG Pathway</b>                       | hsa05152   | Tuberculosis                                                         | 0.03369677 | TGFB1, SRC, TRAF6, PIK3C3, FADD, RAF1,<br>CAMK2G |
| <b>GO Term<br/>Biological<br/>Process</b> | GO:0043087 | regulation of GTPase activity                                        | 0.03492925 | DAB2IP, MLST8, RICTOR, NGEF                      |
| <b>GO Term<br/>Biological<br/>Process</b> | GO:0014068 | positive regulation of<br>phosphatidylinositol 3-kinase<br>signaling | 0.03492925 | GPB1, SOX9, AGT, NKX3-1                          |
| <b>GO Term<br/>Molecular<br/>Function</b> | GO:0001948 | glycoprotein binding                                                 | 0.03494009 | SDCBP, TGFB1, STX1A, BMPR1A                      |
| <b>KEGG Pathway</b>                       | hsa05160   | Hepatitis C                                                          | 0.03502566 | CLDN6, PPP2CB, TRAF3, TRAF6, PIK3CB,<br>RAF1     |

|  |                                   |            |                                      |            |                                                                                                                                                                                                                                    |
|--|-----------------------------------|------------|--------------------------------------|------------|------------------------------------------------------------------------------------------------------------------------------------------------------------------------------------------------------------------------------------|
|  | <b>KEGG Pathway</b>               | hsa05162   | Measles                              | 0.03502566 | HSPA8, TRAF6, FAS, TAB2, PIK3CB, CD46                                                                                                                                                                                              |
|  | <b>GO Term Biological Process</b> | GO:0032008 | positive regulation of TOR signaling | 0.03538169 | MLST8, RICTOR, LAMTOR1                                                                                                                                                                                                             |
|  | <b>GO Term Cellular Component</b> | GO:0016020 | membrane                             | 0.0361892  | CYFIP2, LGALS3BP, DGKA, PANX1, SDCBP, LGALS3, STK11, HERC1, FLOT1, STOM, PIP4K2C, CAMK2G, HSPA8, TOR1A, TAP2, RRAS2, TAP1, MUL1, F5, PRRC2A, SLC7A5, PLSCR1, AGO2, CD7, EXOC4, SFXN3, SPRY2, FAS, PIK3C3, PFN1, VAMP2, NGEF, ARL8B |

|  |                                           |            |         |            |                                                                                                                                                                                                                                                                                                                                                                                                                                                                                                                                        |
|--|-------------------------------------------|------------|---------|------------|----------------------------------------------------------------------------------------------------------------------------------------------------------------------------------------------------------------------------------------------------------------------------------------------------------------------------------------------------------------------------------------------------------------------------------------------------------------------------------------------------------------------------------------|
|  | <b>GO Term<br/>Cellular<br/>Component</b> | GO:0005634 | nucleus | 0.03620605 | CYFIP2, GLDC, IRS1, GFI1, NAB2, ONECUT1,<br>PIK3CB, ZBTB22, ETS2, LGALS3, STK11,<br>NUDCD1, SOX18, GPER1, SUFU, SOX9, CIC,<br>SOX4, RAB8A, NKX3-1, BCAS3, TESC, ITGA2,<br>APOA1, PAX6, HNF1A, ETV4, TOPORS,<br>UHMK1, NR5A1, PLSCR1, TRAF6, RARA,<br>RAF1, ATF5, PFN1, ZFPM1, SGK2, CEBPA,<br>LAMA5, PRKAA1, PDXK, SRC, NEDD9,<br>MAT2B, BPHL, GLIS2, REPIN1, PPP2CB,<br>DSCR3, SDCBP, PRDX4, ZBTB7B, HSPA8,<br>TGFB1, TXNRD3, ZBTB14, RANBP9, SORBS1,<br>HIPK2, PNRC2, PRRC2A, PPP5C, AGO2,<br>RPS6KB2, ID1, SPRY2, FAS, PTPN2, MSRB1 |
|--|-------------------------------------------|------------|---------|------------|----------------------------------------------------------------------------------------------------------------------------------------------------------------------------------------------------------------------------------------------------------------------------------------------------------------------------------------------------------------------------------------------------------------------------------------------------------------------------------------------------------------------------------------|

|                                           |            |                                        |            |                                                                                                                                                                               |
|-------------------------------------------|------------|----------------------------------------|------------|-------------------------------------------------------------------------------------------------------------------------------------------------------------------------------|
| <b>GO Term<br/>Molecular<br/>Function</b> | GO:0042605 | peptide antigen binding                | 0.03784053 | SLC7A5, FCGRT, TAP1                                                                                                                                                           |
| <b>KEGG Pathway</b>                       | hsa05168   | Herpes simplex infection               | 0.03870393 | TRAF3, TRAF6, TAP2, FAS, TAP1, TAB2, FADD                                                                                                                                     |
| <b>GO Term<br/>Molecular<br/>Function</b> | GO:0005524 | ATP binding                            | 0.03940311 | PDXK, PRKAA1, SRC, DGKA, PIK3CB, HSPA13, GPHN, PAPSS1, STK11, PIP4K2C, CAMK2G, HSPA8, TOR1A, TAP2, TAP1, MERTK, HIPK2, UHMK1, PPP5C, AXL, RPS6KB2, PIK3C3, RAF1, SGK2, BMPR1A |
| <b>GO Term<br/>Biological<br/>Process</b> | GO:0006461 | protein complex assembly               | 0.03943268 | TRAF6, RANBP9, FAS, SOX9, VAMP2                                                                                                                                               |
| <b>GO Term<br/>Cellular<br/>Component</b> | GO:0005770 | late endosome                          | 0.04019831 | HSPA8, UVRAG, SRC, VPS33B, PIK3C3                                                                                                                                             |
| <b>GO Term<br/>Molecular<br/>Function</b> | GO:0005164 | tumor necrosis factor receptor binding | 0.04035499 | TRAF3, TRAF6, FADD                                                                                                                                                            |

|                                   |            |                                                         |            |                                                                                                                                                          |
|-----------------------------------|------------|---------------------------------------------------------|------------|----------------------------------------------------------------------------------------------------------------------------------------------------------|
| <b>GO Term Cellular Component</b> | GO:0070044 | synaptobrevin 2-SNAP-25-syntaxin-1a complex             | 0.04148427 | STX1A, VAMP2                                                                                                                                             |
| <b>GO Term Cellular Component</b> | GO:0070032 | synaptobrevin 2-SNAP-25-syntaxin-1a-complexin I complex | 0.04148427 | STX1A, VAMP2                                                                                                                                             |
| <b>GO Term Cellular Component</b> | GO:0005622 | intracellular                                           | 0.04161022 | BCAR3, HSPA8, PRKAA1, DGKA, RRAS2, MTR, MAT2B, PIK3CB, TOM1L1, SDCBP, TRIM39, AXL, RAB23, GPER1, GOLGA1, PIK3C3, OSTF1, RAF1, SGK2, STX1A, ARL8B, NKX3-1 |
| <b>KEGG Pathway</b>               | hsa04066   | HIF-1 signaling pathway                                 | 0.04191534 | EPO, RPS6KB2, PIK3CB, CAMK2G, EIF4E                                                                                                                      |
| <b>GO Term Biological Process</b> | GO:0098869 | cellular oxidant detoxification                         | 0.04208168 | PRDX4, TXNRD3, HP, GPX7                                                                                                                                  |
| <b>GO Term Biological Process</b> | GO:0033138 | positive regulation of peptidyl-serine phosphorylation  | 0.04208168 | BCAR3, TGFB1, SPRY2, RAF1                                                                                                                                |
| <b>GO Term Biological Process</b> | GO:0031647 | regulation of protein stability                         | 0.04208168 | HSPA8, MUL1, STUB1, SOX4                                                                                                                                 |

|                                           |            |                                                                          |            |                        |
|-------------------------------------------|------------|--------------------------------------------------------------------------|------------|------------------------|
| <b>GO Term<br/>Molecular<br/>Function</b> | GO:0001618 | virus receptor activity                                                  | 0.04209446 | AXL, ITGA2, F11R, CD46 |
| <b>GO Term<br/>Biological<br/>Process</b> | GO:0034504 | protein localization to nucleus                                          | 0.04292196 | TOR1A, SOX9, TOPORS    |
| <b>GO Term<br/>Biological<br/>Process</b> | GO:0051387 | negative regulation of<br>neurotrophin TRK receptor<br>signaling pathway | 0.04334948 | SPRY2, AGT             |
| <b>GO Term<br/>Biological<br/>Process</b> | GO:0050882 | voluntary musculoskeletal<br>movement                                    | 0.04334948 | VTI1A, HIPK2           |
| <b>GO Term<br/>Biological<br/>Process</b> | GO:1901203 | positive regulation of extracellular<br>matrix assembly                  | 0.04334948 | TGFB1, SOX9            |
| <b>GO Term<br/>Biological<br/>Process</b> | GO:0042992 | negative regulation of transcription<br>factor import into nucleus       | 0.04334948 | RAB23, SUFU            |
| <b>GO Term<br/>Biological<br/>Process</b> | GO:0071677 | positive regulation of mononuclear<br>cell migration                     | 0.04334948 | LGALS3, TGFB1          |
| <b>GO Term<br/>Biological<br/>Process</b> | GO:0003170 | heart valve development                                                  | 0.04334948 | ZBTB14, SOX9           |
| <b>GO Term<br/>Biological<br/>Process</b> | GO:0060534 | trachea cartilage development                                            | 0.04334948 | RARA, SOX9             |
| <b>GO Term<br/>Biological<br/>Process</b> | GO:0030858 | positive regulation of epithelial cell<br>differentiation                | 0.04334948 | PAX6, SOX9             |

|                                           |            |                                                               |            |                                                        |
|-------------------------------------------|------------|---------------------------------------------------------------|------------|--------------------------------------------------------|
| <b>GO Term<br/>Molecular<br/>Function</b> | GO:0046978 | TAP1 binding                                                  | 0.04335392 | TAP2, TAP1                                             |
| <b>GO Term<br/>Biological<br/>Process</b> | GO:0071347 | cellular response to interleukin-1                            | 0.04359383 | DAB2IP, SOX9, TFPI, NKX3-1                             |
| <b>GO Term<br/>Cellular<br/>Component</b> | GO:0030659 | cytoplasmic vesicle membrane                                  | 0.04437487 | TOR1A, GPER1, PACSIN2, ZDHHC17, RAB8A                  |
| <b>GO Term<br/>Biological<br/>Process</b> | GO:0010951 | negative regulation of endopeptidase activity                 | 0.0448821  | ITIH5, SERPINE2, PROS1, TFPI, AGT                      |
| <b>GO Term<br/>Biological<br/>Process</b> | GO:0043507 | positive regulation of JUN kinase activity                    | 0.04555701 | TRAF6, DAB2IP, TNFRSF11A                               |
| <b>GO Term<br/>Biological<br/>Process</b> | GO:0043552 | positive regulation of phosphatidylinositol 3-kinase activity | 0.04555701 | TGFB1, IRS1, SRC                                       |
| <b>GO Term<br/>Molecular<br/>Function</b> | GO:0005158 | insulin receptor binding                                      | 0.04556637 | IRS1, SRC, SORBS1                                      |
| <b>KEGG Pathway</b>                       | hsa04915   | Estrogen signaling pathway                                    | 0.04607262 | HSPA8, SRC, GPER1, PIK3CB, RAF1                        |
| <b>KEGG Pathway</b>                       | hsa04144   | Endocytosis                                                   | 0.04616609 | HSPA8, SRC, TRAF6, ARPC5L, CHMP7, AP2M1, RAB8A, SH3GL1 |
| <b>GO Term<br/>Cellular<br/>Component</b> | GO:0090575 | RNA polymerase II transcription factor complex                | 0.04709657 | NR5A1, CEBPA, HIPK2                                    |

|                                           |            |                                      |            |                                                                                |
|-------------------------------------------|------------|--------------------------------------|------------|--------------------------------------------------------------------------------|
| <b>GO Term<br/>Cellular<br/>Component</b> | GO:0030496 | midbody                              | 0.04766121 | UVRAG, PKP4, PIK3C3, TOPORS, ARL8B                                             |
| <b>KEGG Pathway</b>                       | hsa05161   | Hepatitis B                          | 0.04787304 | TGFB1, SRC, FAS, FADD, PIK3CB, RAF1                                            |
| <b>GO Term<br/>Biological<br/>Process</b> | GO:0007032 | endosome organization                | 0.04825018 | VPS33B, PIK3C3, LAMTOR1                                                        |
| <b>GO Term<br/>Biological<br/>Process</b> | GO:0001889 | liver development                    | 0.048291   | CEBPA, ONECUT1, RARA, HNF1A                                                    |
| <b>GO Term<br/>Biological<br/>Process</b> | GO:0030334 | regulation of cell migration         | 0.048291   | LAMA5, TGFB1, SERPINE2, PAX6                                                   |
| <b>GO Term<br/>Biological<br/>Process</b> | GO:0042384 | cilium assembly                      | 0.04834418 | LAMA5, RAB23, ONECUT1, CEP83, RAB8A                                            |
| <b>KEGG Pathway</b>                       | hsa04950   | Maturity onset diabetes of the young | 0.0485564  | ONECUT1, PAX6, HNF1A                                                           |
| <b>GO Term<br/>Cellular<br/>Component</b> | GO:0000932 | cytoplasmic mRNA processing body     | 0.04930052 | AGO2, EIF4E, TNRC6A, PNRC2                                                     |
| <b>GO Term<br/>Biological<br/>Process</b> | GO:0006915 | apoptotic process                    | 0.04959696 | CYFIP2, PLSCR1, RTKN, TRIM39, ADAM15, TRAF3, EPO, HIP1R, FAS, MUL1, FADD, RAF1 |



|   |                                           |            |                                |            |                                                                                                                                                                                                                                                                                                                                                                                                   |
|---|-------------------------------------------|------------|--------------------------------|------------|---------------------------------------------------------------------------------------------------------------------------------------------------------------------------------------------------------------------------------------------------------------------------------------------------------------------------------------------------------------------------------------------------|
|   | <b>GO Term<br/>Cellular<br/>Component</b> | GO:0005875 | microtubule associated complex | 0.04970148 | CLIP2, DNAAF2, RANBP9                                                                                                                                                                                                                                                                                                                                                                             |
| 3 | <b>GO Term<br/>Cellular<br/>Component</b> | GO:0016021 | integral component of membrane | 1.25E-04   | SFT2D3, MOGAT3, XYLT2, ZDHHC2, LCLAT1, FADS3, FADS2, C1GALT1C1, C14ORF1, ACP2, SLC37A4, SLC37A3, SEMA6B, RNF43, ABCG8, JAGN1, AREL1, PAQR7, IL11RA, PLLP, APLP1, ACSL4, LIFR, ELOVL6, TEX2, TGFBR3, TMEM37, SYPL1, CLDN15, PITPNM2, SLC27A4, RNFT2, TMEM161A, LRP4, LCAT, HMGCR, GPD5, SLC5A3, ZNF7, SYNGR2, UCP2, MARVELD3, FZD3, SLC12A5, FZD4, EPHX1, ATP2B4, YIF1A, NCEH1, LPAR6, BAMBI, LGR4 |

|                                           |            |                                          |            |                                                                                                                                                         |
|-------------------------------------------|------------|------------------------------------------|------------|---------------------------------------------------------------------------------------------------------------------------------------------------------|
| <b>GO Term<br/>Biological<br/>Process</b> | GO:0007584 | response to nutrient                     | 5.37E-04   | ABCG8, SERPINC1, ACSL4, HMGCR,<br>SLC37A4, SLC27A4                                                                                                      |
| <b>GO Term<br/>Cellular<br/>Component</b> | GO:0005789 | endoplasmic reticulum membrane           | 5.56E-04   | RNF43, JAGN1, MOGAT3, EPHX1, XYLT2,<br>ACSL4, ELOVL6, HMGCR, LCLAT1, YIF1A,<br>FADS3, FADS2, NCEH1, C14ORF1, RAB18,<br>RAB3GAP2, SDF2, SLC37A4, SLC27A4 |
| <b>KEGG Pathway</b>                       | hsa01212   | Fatty acid metabolism                    | 0.00110203 | FADS2, ACSL4, ELOVL6, ACADM, ACACA                                                                                                                      |
| <b>GO Term<br/>Cellular<br/>Component</b> | GO:0005887 | integral component of plasma<br>membrane | 0.0013585  | SEMA6B, RNF43, SLC12A5, FZD4, IL11RA,<br>ATP2B4, LIFR, ZDHHC2, SLC5A3, TGFBR3,<br>FADS2, APOM, SYPL1, MMP15, LPAR6,<br>PALM, PLXNB1, LGR4               |
| <b>GO Term<br/>Biological<br/>Process</b> | GO:0006629 | lipid metabolic process                  | 0.00179596 | PLA2G15, FADS3, FADS2, LCAT, ACSL4,<br>GDPD5, SLC27A4                                                                                                   |

|                                   |            |                                             |            |                                                 |
|-----------------------------------|------------|---------------------------------------------|------------|-------------------------------------------------|
| <b>KEGG Pathway</b>               | hsa03320   | PPAR signaling pathway                      | 0.0025009  | FADS2, NR1H3, ACSL4, ACADM, SLC27A4             |
| <b>GO Term Biological Process</b> | GO:0043087 | regulation of GTPase activity               | 0.00263199 | SYDE1, RAB3GAP2, PLXNB1, IQGAP2, RAP1GAP        |
| <b>GO Term Biological Process</b> | GO:0042632 | cholesterol homeostasis                     | 0.00282656 | ABCG8, APOM, LCAT, NR1H3, SLC37A4               |
| <b>GO Term Biological Process</b> | GO:0008152 | metabolic process                           | 0.00335912 | NCEH1, PITPNM2, GSTA1, IDS, ACSL4, LCLAT1, SGSH |
| <b>GO Term Biological Process</b> | GO:0046855 | inositol phosphate dephosphorylation        | 0.00437766 | IMPA1, INPP1, INPP5K                            |
| <b>GO Term Biological Process</b> | GO:0006636 | unsaturated fatty acid biosynthetic process | 0.00543151 | FADS3, FADS2, ELOVL6                            |
| <b>GO Term Molecular Function</b> | GO:0008374 | O-acyltransferase activity                  | 0.00545666 | PLA2G15, LCAT, LCLAT1                           |
| <b>GO Term Molecular Function</b> | GO:0008289 | lipid binding                               | 0.00664714 | STARD4, PITPNM2, STARD10, FNBP1L, TEX2, EPN1    |
| <b>GO Term Cellular Component</b> | GO:0030424 | axon                                        | 0.0066958  | FZD3, PALM, RNF6, ACADM, GPD5, RAP1GAP, NRG1    |
| <b>KEGG Pathway</b>               | hsa00564   | Glycerophospholipid metabolism              | 0.00822832 | PLA2G15, PLA2G12B, DGKQ, LCAT, LCLAT1           |

|  |                                           |            |                                  |            |                                                                                                                                         |
|--|-------------------------------------------|------------|----------------------------------|------------|-----------------------------------------------------------------------------------------------------------------------------------------|
|  | <b>GO Term<br/>Molecular<br/>Function</b> | GO:0017127 | cholesterol transporter activity | 0.00924924 | ABCG8, STARD4, STARD5                                                                                                                   |
|  | <b>KEGG Pathway</b>                       | hsa04976   | Bile secretion                   | 0.01088936 | ABCG8, NCEH1, EPHX1, HMGCR                                                                                                              |
|  | <b>GO Term<br/>Biological<br/>Process</b> | GO:0006805 | xenobiotic metabolic process     | 0.01805956 | NCEH1, ACY1, EPHX1, SULT1A2                                                                                                             |
|  | <b>KEGG Pathway</b>                       | hsa01100   | Metabolic pathways               | 0.01812926 | PLA2G12B, MOGAT3, ACY1, INPP1, XYLT2, PIPOX, ACSL4, HMGCR, LCLAT1, ACACA, SGSH, MINPP1, C1GALT1C1, IMPA1, DGKQ, PGP, INPP5K, IDS, ACADM |
|  | <b>GO Term<br/>Biological<br/>Process</b> | GO:0006810 | transport                        | 0.01844254 | AP3M2, SLC12A5, SYPL1, PITPNM2, UCP2, SLC37A4, SLC5A3, SLC27A4                                                                          |

|                                           |            |                               |            |                                                                                                                                                                                                                                                                 |
|-------------------------------------------|------------|-------------------------------|------------|-----------------------------------------------------------------------------------------------------------------------------------------------------------------------------------------------------------------------------------------------------------------|
| <b>GO Term<br/>Cellular<br/>Component</b> | GO:0005886 | plasma membrane               | 0.02187989 | PHLPP1, SERPINC1, IDE, FNBP1L, ZDHHC2, SLC5A3, ADD1, PALM, FCHO2, INPP5K, MESDC2, RNF43, ABCG8, FZD3, PAQR7, SLC12A5, FZD4, IL11RA, ARDC1, APLP1, ATP2B4, LIFR, RABGGTB, EPN1, RAP2C, CLDN15, BAMBI, MMP15, LPAR6, DGKQ, RAB18, RAB3GAP2, PLXNB1, LGR4, SLC27A4 |
| <b>KEGG Pathway</b>                       | hsa00562   | Inositol phosphate metabolism | 0.02754626 | MINPP1, IMPA1, INPP1, INPP5K                                                                                                                                                                                                                                    |
| <b>GO Term<br/>Cellular<br/>Component</b> | GO:0043025 | neuronal cell body            | 0.02892627 | FZD3, SLC12A5, LRP4, ACSL4, GPD5, RAP1GAP, NRG1                                                                                                                                                                                                                 |
| <b>GO Term<br/>Molecular<br/>Function</b> | GO:0030165 | PDZ domain binding            | 0.03085817 | TGFR3, FZD3, FZD4, ATP2B4                                                                                                                                                                                                                                       |
| <b>KEGG Pathway</b>                       | hsa04975   | Fat digestion and absorption  | 0.03459033 | ABCG8, PLA2G12B, MOGAT3                                                                                                                                                                                                                                         |

|  |                                           |            |                           |            |                                                                                                                                                                                                                                               |
|--|-------------------------------------------|------------|---------------------------|------------|-----------------------------------------------------------------------------------------------------------------------------------------------------------------------------------------------------------------------------------------------|
|  | <b>GO Term<br/>Biological<br/>Process</b> | GO:0001942 | hair follicle development | 0.0348561  | FZD3, LRP4, LGR4                                                                                                                                                                                                                              |
|  | <b>KEGG Pathway</b>                       | hsa04142   | Lysosome                  | 0.03538716 | AP3M2, PLA2G15, IDS, ACP2, SGSH                                                                                                                                                                                                               |
|  | <b>GO Term<br/>Biological<br/>Process</b> | GO:0006897 | endocytosis               | 0.03551937 | SNX18, APLP1, LRP4, FNBP1L, EPN1                                                                                                                                                                                                              |
|  | <b>GO Term<br/>Molecular<br/>Function</b> | GO:0005096 | GTPase activator activity | 0.03839216 | TIAM2, SYDE1, SH3BP1, RASA2, RAB3GAP2, PLXNB1, RAP1GAP                                                                                                                                                                                        |
|  | <b>GO Term<br/>Cellular<br/>Component</b> | GO:0070062 | extracellular exosome     | 0.0403175  | LAD1, ACY1, SERPINC1, SERPINA10, ERV3-1, LCAT, FNBP1L, IQGAP2, CPN2, ACACA, SGSH, C1GALT1C1, APOM, SYNGR2, IMPA1, ACP2, ACADM, FZD4, PLLP, ARRDC1, GPX3, ACSL4, LIFR, TGFBR3, RAP2C, PLA2G15, TIAM2, MINPP1, SNX18, SYPL1, GSTA1, RAB18, NIT1 |

|  |                                           |            |                                                                |            |                                                                                                                                   |
|--|-------------------------------------------|------------|----------------------------------------------------------------|------------|-----------------------------------------------------------------------------------------------------------------------------------|
|  | <b>GO Term<br/>Cellular<br/>Component</b> | GO:0043235 | receptor complex                                               | 0.04421737 | TGFB3, ABCG8, NR1H3, LIFR                                                                                                         |
|  | <b>GO Term<br/>Molecular<br/>Function</b> | GO:0061513 | glucose 6-phosphate:inorganic<br>phosphate antiporter activity | 0.04478983 | SLC37A4, SLC37A3                                                                                                                  |
|  | <b>GO Term<br/>Biological<br/>Process</b> | GO:0016311 | dephosphorylation                                              | 0.0452492  | MINPP1, PGP, INPP5K, ACP2                                                                                                         |
|  | <b>GO Term<br/>Molecular<br/>Function</b> | GO:0008270 | zinc ion binding                                               | 0.04677881 | RNFT2, ZNF331, RNF43, ANKIB1, CHURC1,<br>ACY1, NR1H3, RNF6, CRIP3, IDE, RABGGTB,<br>ZDHHC2, CPN1, ZNF92, MMP15, LONRF3,<br>HIF1AN |

|   |                            |            |                                 |          |                                                                                                                                                                                                                                                                         |
|---|----------------------------|------------|---------------------------------|----------|-------------------------------------------------------------------------------------------------------------------------------------------------------------------------------------------------------------------------------------------------------------------------|
| 4 | KEGG Pathway               | hsa01100   | Metabolic pathways              | 6.09E-10 | PRPS2, LIPT1, FH, SGMS1, PIGO, GPAA1, HEXB, AKR1D1, MPI, DLST, PYGL, ENO3, GMPPB, UGP2, HSD17B2, PGM2, MAN1A1, MECR, CHPF2, CSGALNACT2, MOGS, DOLK, ALG11, HOGA1, ALG1, PRODH2, GANC, AGMAT, COQ5, RPIA, PIGC, PIGB, NDUFS7, NMNAT1, OGDH, ALDOC, DEGS1, B4GALT7, CERS1 |
|   | GO Term Biological Process | GO:0006506 | GPI anchor biosynthetic process | 2.80E-05 | PIGC, PIGB, PYURF, PIGO, PIGZ, MPPE1                                                                                                                                                                                                                                    |



|  |                                           |            |                                |          |                                                                                                                                                                                                                                                                                                                                                                                                                                                                                                                                                                                                                                                                                                                                                                                                          |
|--|-------------------------------------------|------------|--------------------------------|----------|----------------------------------------------------------------------------------------------------------------------------------------------------------------------------------------------------------------------------------------------------------------------------------------------------------------------------------------------------------------------------------------------------------------------------------------------------------------------------------------------------------------------------------------------------------------------------------------------------------------------------------------------------------------------------------------------------------------------------------------------------------------------------------------------------------|
|  | <b>GO Term<br/>Cellular<br/>Component</b> | GO:0016021 | integral component of membrane | 3.28E-05 | <p>           PIGO, OGFOD3, PIGZ, TMEM181, PKD2,<br/>           NAGPA, TMEM261, SYNE2, MAN1A1,<br/>           ABCD1, SMIM12, SLC39A4, ARSA, SMIM15,<br/>           CHST7, CHPF2, CSGALNACT2, MOGS,<br/>           HOGA1, MANEAL, ALG11, ALG1,<br/>           POMGNT1, PIGC, PIGB, DNAJC30, RFT1,<br/>           TMEM126A, CRELD1, L2HGDH, MPPE1,<br/>           B4GALT7, CERS1, SLC26A2, TP53I13,<br/>           LMAN2L, SGMS1, CHRNA5, HEPACAM,<br/>           HPN, OMA1, TMTC4, HSD17B2, CLPTM1,<br/>           CHST13, EMC6, MEST, GPR157, CMTM7,<br/>           NUS1, OPN3, PEX19, SRD5A3, TMEM132A,<br/>           ERLIN1, TMEM62, MARCH9, DOLK, AIG1,<br/>           SLC8B1, TMEM60, C12ORF76, RPIA, CDAN1,<br/>           TSPAN13, REEP4, DEGS1, CNIH4, SSBP4,<br/>           TECPR1         </p> |
|--|-------------------------------------------|------------|--------------------------------|----------|----------------------------------------------------------------------------------------------------------------------------------------------------------------------------------------------------------------------------------------------------------------------------------------------------------------------------------------------------------------------------------------------------------------------------------------------------------------------------------------------------------------------------------------------------------------------------------------------------------------------------------------------------------------------------------------------------------------------------------------------------------------------------------------------------------|

|  |                                           |            |                                                                         |            |                                                                                                                                                                                 |
|--|-------------------------------------------|------------|-------------------------------------------------------------------------|------------|---------------------------------------------------------------------------------------------------------------------------------------------------------------------------------|
|  | <b>GO Term<br/>Cellular<br/>Component</b> | GO:0005789 | endoplasmic reticulum membrane                                          | 5.82E-05   | ABHD4, LMAN2L, PIGO, GPAA1, HPN, PIGZ, PKD2, UFL1, HSD17B2, MEST, NUS1, SEC24B, SRD5A3, TMEM132A, ERLIN1, MOGS, DOLK, ALG11, ALG1, PIGC, PYURF, PIGB, REEP4, RFT1, DEGS1, CERS1 |
|  | <b>KEGG Pathway</b>                       | hsa00532   | Glycosaminoglycan biosynthesis - chondroitin sulfate / dermatan sulfate | 1.21E-04   | CHST7, CHPF2, CSGALNACT2, CHST13, B4GALT7                                                                                                                                       |
|  | <b>KEGG Pathway</b>                       | hsa00563   | Glycosylphosphatidylinositol(GPI)-anchor biosynthesis                   | 3.94E-04   | PIGC, PIGB, PIGO, GPAA1, PIGZ                                                                                                                                                   |
|  | <b>GO Term<br/>Molecular<br/>Function</b> | GO:0016787 | hydrolase activity                                                      | 6.43E-04   | ABHD11, ABHD4, ABHD8, TMEM62, MPPE1, ABHD5, MEST, GLA, CTSC, CES2                                                                                                               |
|  | <b>GO Term<br/>Biological<br/>Process</b> | GO:0097502 | mannosylation                                                           | 7.23E-04   | PIGB, PIGZ, ALG1, ALG11                                                                                                                                                         |
|  | <b>KEGG Pathway</b>                       | hsa00600   | Sphingolipid metabolism                                                 | 0.00233606 | ARSA, SGMS1, DEGS1, GLA, CERS1                                                                                                                                                  |

|  |                                           |            |                                          |            |                                                                                                                                                                                                                                    |
|--|-------------------------------------------|------------|------------------------------------------|------------|------------------------------------------------------------------------------------------------------------------------------------------------------------------------------------------------------------------------------------|
|  | <b>GO Term<br/>Cellular<br/>Component</b> | GO:0005783 | endoplasmic reticulum                    | 0.00246943 | CEMIP, SAR1A, SGMS1, TMEM132A, SRD5A3, EDEM2, ERLIN1, PIGZ, MOGS, ALG1, PKD2, UFL1, TRAPPC6A, REEP4, DEGS1, MAN1A1, MPPE1, MEST, CNIH4, CES2, CERS1                                                                                |
|  | <b>GO Term<br/>Biological<br/>Process</b> | GO:0030206 | chondroitin sulfate biosynthetic process | 0.00250355 | CHST7, CHPF2, CSGALNACT2, CHST13                                                                                                                                                                                                   |
|  | <b>GO Term<br/>Cellular<br/>Component</b> | GO:0005739 | mitochondrion                            | 0.00251695 | MIPEP, LIPT1, FH, MRPS36, DLST, SYNE2, GMPPB, ABHD11, HARS, ABCD1, MECR, APOOL, HOGA1, SYNJ2BP, PRODH2, NIPSNAP1, AGMAT, COQ5, COQ4, ARMC1, PYURF, OXLD1, DNAJC30, RPUSD3, TMEM126A, OGDH, PTRH1, ALDOC, TPP1, DEGS1, L2HGDH, AARS |

|                                           |            |                                                       |            |                                                     |
|-------------------------------------------|------------|-------------------------------------------------------|------------|-----------------------------------------------------|
| <b>GO Term<br/>Biological<br/>Process</b> | GO:0005975 | carbohydrate metabolic process                        | 0.00270925 | HEXB, MPI, PGM2, PYGL, NAGPA,<br>B4GALT7, GLA, GANC |
| <b>GO Term<br/>Cellular<br/>Component</b> | GO:0036064 | ciliary basal body                                    | 0.00274304 | C2CD3, IFT172, POC1A, B9D1, CEP41, BBS7,<br>PKD2    |
| <b>KEGG Pathway</b>                       | hsa01200   | Carbon metabolism                                     | 0.00326684 | PRPS2, RPIA, FH, OGDH, DLST, ALDOC,<br>ENO3         |
| <b>KEGG Pathway</b>                       | hsa00500   | Starch and sucrose metabolism                         | 0.0035459  | UGP2, PGM2, PYGL, GANC                              |
| <b>KEGG Pathway</b>                       | hsa00520   | Amino sugar and nucleotide sugar<br>metabolism        | 0.00369185 | GMPPB, UGP2, HEXB, MPI, PGM2                        |
| <b>GO Term<br/>Biological<br/>Process</b> | GO:0001947 | heart looping                                         | 0.00426957 | C2CD3, IFT172, NPHP3, BBS7, PKD2                    |
| <b>KEGG Pathway</b>                       | hsa00510   | N-Glycan biosynthesis                                 | 0.00435813 | MOGS, MAN1A1, DOLK, ALG1, ALG11                     |
| <b>GO Term<br/>Biological<br/>Process</b> | GO:0006489 | dolichyl diphosphate biosynthetic<br>process          | 0.00474908 | NUS1, SRD5A3, DOLK                                  |
| <b>GO Term<br/>Molecular<br/>Function</b> | GO:0016757 | transferase activity, transferring<br>glycosyl groups | 0.00520579 | PIGB, PIGZ, ALG1, B4GALT7, B3GNTL1                  |
| <b>KEGG Pathway</b>                       | hsa00052   | Galactose metabolism                                  | 0.00522541 | UGP2, PGM2, GLA, GANC                               |

|                                   |            |                                                      |            |                                                                                                                                    |
|-----------------------------------|------------|------------------------------------------------------|------------|------------------------------------------------------------------------------------------------------------------------------------|
| <b>KEGG Pathway</b>               | hsa01130   | Biosynthesis of antibiotics                          | 0.00547694 | PRPS2, RPIA, FH, UGP2, OGDH, PGM2, DLST, ALDOC, ENO3                                                                               |
| <b>GO Term Biological Process</b> | GO:0046487 | glyoxylate metabolic process                         | 0.00580169 | LIPT1, OGDH, DLST, HOGA1                                                                                                           |
| <b>KEGG Pathway</b>               | hsa00030   | Pentose phosphate pathway                            | 0.00587475 | PRPS2, RPIA, PGM2, ALDOC                                                                                                           |
| <b>GO Term Cellular Component</b> | GO:0000139 | Golgi membrane                                       | 0.00707982 | SEC24B, CHST7, LMAN2L, SGMS1, CHPF2, TMEM132A, CSGALNACT2, MARCH9, MANEAL, POMGNT1, TRAPPC6A, MAN1A1, CHST13, B4GALT7, CTSC, CERS1 |
| <b>GO Term Biological Process</b> | GO:0006629 | lipid metabolic process                              | 0.0081392  | LIPT1, ABHD4, SRD5A3, NPHP3, TPP1, OMA1, ABHD5                                                                                     |
| <b>GO Term Biological Process</b> | GO:0032259 | methylation                                          | 0.0137802  | SMYD5, PRDM15, METTL6, METTL21B, COQ5                                                                                              |
| <b>GO Term Cellular Component</b> | GO:0005793 | endoplasmic reticulum-Golgi intermediate compartment | 0.01561923 | LMAN2L, TRAPPC12, MAN1A1, MPPE1, CNIH4                                                                                             |

|                                           |            |                                  |            |                                             |
|-------------------------------------------|------------|----------------------------------|------------|---------------------------------------------|
| <b>GO Term<br/>Molecular<br/>Function</b> | GO:0000030 | mannosyltransferase activity     | 0.01619593 | PIGB, PIGZ, ALG1                            |
| <b>GO Term<br/>Cellular<br/>Component</b> | GO:0005814 | centriole                        | 0.02293206 | C2CD3, CEP120, STARD9, POC1A, CEP192, CEP41 |
| <b>KEGG Pathway</b>                       | hsa04142   | Lysosome                         | 0.02391508 | ARSA, HEXB, TPP1, NAGPA, GLA, CTSC          |
| <b>GO Term<br/>Biological<br/>Process</b> | GO:0007031 | peroxisome organization          | 0.02477138 | PEX19, PEX10, ABCD1                         |
| <b>GO Term<br/>Biological<br/>Process</b> | GO:0006491 | N-glycan processing              | 0.02779288 | EDEM2, MAN1A1, ENGASE                       |
| <b>GO Term<br/>Biological<br/>Process</b> | GO:0006103 | 2-oxoglutarate metabolic process | 0.02779288 | MRPS36, OGDH, L2HGDH                        |
| <b>GO Term<br/>Biological<br/>Process</b> | GO:0006486 | protein glycosylation            | 0.03129545 | SRD5A3, MPI, ALG1, NAGPA, POMGNT1           |
| <b>GO Term<br/>Molecular<br/>Function</b> | GO:0008168 | methyltransferase activity       | 0.03526982 | SMYD5, PRDM15, METTL6, METTL21B, COQ5       |
| <b>GO Term<br/>Molecular<br/>Function</b> | GO:0003824 | catalytic activity               | 0.0360155  | PIGC, ARSA, FH, ISOC1, MEST, GLA, GANC      |
| <b>GO Term<br/>Biological<br/>Process</b> | GO:0046513 | ceramide biosynthetic process    | 0.04122621 | SGMS1, DEGS1, CERS1                         |

|  |                                           |            |                                                       |            |                                        |
|--|-------------------------------------------|------------|-------------------------------------------------------|------------|----------------------------------------|
|  | <b>GO Term<br/>Biological<br/>Process</b> | GO:0006015 | 5-phosphoribose 1-diphosphate<br>biosynthetic process | 0.04570164 | PRPS2, PYGL                            |
|  | <b>GO Term<br/>Biological<br/>Process</b> | GO:0008152 | metabolic process                                     | 0.04850076 | ARSA, UGP2, STARD9, ISOC1, DLST, HOGA1 |

|   |                                           |            |             |          |                                                                                                                                                                                                                                                                                                                                                                                                                                                                                           |
|---|-------------------------------------------|------------|-------------|----------|-------------------------------------------------------------------------------------------------------------------------------------------------------------------------------------------------------------------------------------------------------------------------------------------------------------------------------------------------------------------------------------------------------------------------------------------------------------------------------------------|
| 5 | <b>GO Term<br/>Cellular<br/>Component</b> | GO:0005654 | nucleoplasm | 4.84E-21 | RB1, MUS81, UBE2D1, CWC25, BRCA2, UBE2Z, EME1, SUMO2, KPNA4, PIP4K2B, TIPIN, H2AFX, RECQL, ESCO2, CDC25C, RAD23B, CLPX, RBX1, RBL2, RBL1, DDX39A, TFDP1, MSH2, SNRPA1, SNRNP25, GEMIN7, DTL, HIST1H2BD, RHNO1, HDAC5, ANAPC15, UHRF2, NOLC1, GPS2, PKMYT1, HDAC8, CENPA, ATXN3, CCNB1, PPP4C, RBBP4, TAF1B, HLTf, E2F2, E2F3, MCL1, MAP2K6, GINS1, CDT1, PPIL2, SETD1B, CBX2, XRCC3, RPA1, HMGA2, DHFR, POLA2, MYO1C, PHF5A, CENPH, CENPI, PRC1, PRKRA, UBE2T, KIF4A, COPS2, CDK12, NUP37 |
|---|-------------------------------------------|------------|-------------|----------|-------------------------------------------------------------------------------------------------------------------------------------------------------------------------------------------------------------------------------------------------------------------------------------------------------------------------------------------------------------------------------------------------------------------------------------------------------------------------------------------|



|  |                                                       |            |                          |          |                                                                                    |
|--|-------------------------------------------------------|------------|--------------------------|----------|------------------------------------------------------------------------------------|
|  | <b>GO Term</b><br><b>Biological</b><br><b>Process</b> | GO:0051726 | regulation of cell cycle | 3.88E-10 | RB1, UHRF2, CCNF, PKMYT1, CDC25C, RBL2, CCNB1, RBL1, RBBP4, UBA3, E2F2, CDK12, DTL |
|--|-------------------------------------------------------|------------|--------------------------|----------|------------------------------------------------------------------------------------|

|  |                                  |            |         |          |                                                                                                                                                                                                                                                                                                                                                                                                                                                                                                         |
|--|----------------------------------|------------|---------|----------|---------------------------------------------------------------------------------------------------------------------------------------------------------------------------------------------------------------------------------------------------------------------------------------------------------------------------------------------------------------------------------------------------------------------------------------------------------------------------------------------------------|
|  | GO Term<br>Cellular<br>Component | GO:0005634 | nucleus | 4.60E-10 | RB1, MUS81, CCNJ, CCNF, BRCA2, MKI67, CHAF1A, EME1, SUMO2, NEK2, ENOPH1, TRIM23, TIPIN, H2AFX, RECQL, ESCO2, CDC25C, RAD23B, RBL2, RBL1, DDX39A, TFDP1, ESPL1, KIFC1, SNRNP25, GEMIN7, UBE2V1, UMP5, DTL, HIST1H2BD, RHNO1, HDAC5, RNASEH2C, UHRF2, FOXK1, HDAC8, CENPA, ATXN3, CCNB1, PPP4C, RBBP4, TAF1B, HLTf, RBBP9, E2F3, MCL1, CTC1, GINS1, CDT1, CDKN2C, PPIL2, SETD1B, CBX2, XRCC3, RPA1, HMGA2, APEX2, UBOX5, CENPH, CENPI, PRC1, DNAJA3, UBE2T, TDP1, UBA3, BAX, CDK12, CLASRP, TRIM32, NUP37 |
|--|----------------------------------|------------|---------|----------|---------------------------------------------------------------------------------------------------------------------------------------------------------------------------------------------------------------------------------------------------------------------------------------------------------------------------------------------------------------------------------------------------------------------------------------------------------------------------------------------------------|

|  |                                           |            |                 |          |                                                                                                                                                                                                                                                                                                                                                                                                                                                                                                                                                                                                                                                                                                        |
|--|-------------------------------------------|------------|-----------------|----------|--------------------------------------------------------------------------------------------------------------------------------------------------------------------------------------------------------------------------------------------------------------------------------------------------------------------------------------------------------------------------------------------------------------------------------------------------------------------------------------------------------------------------------------------------------------------------------------------------------------------------------------------------------------------------------------------------------|
|  | <b>GO Term<br/>Molecular<br/>Function</b> | GO:0005515 | protein binding | 5.18E-09 | RB1, OTUD4, MUS81, MOCS3, CCNF,<br>UBE2D1, BRCA2, MKI67, UBE2Z, TCHP,<br>CHAF1A, EME1, SUMO2, KPNA4, NEK2,<br>PIP4K2B, CEP55, TRIM23, TIPIN, H2AFX,<br>LANCL1, RECQL, CDC25C, RAD23B,<br>CCNB1IP1, CLPX, RBX1, RBL2, RBL1,<br>DDX39A, TFDP1, PSRC1, MSH2, ESPL1,<br>SNRPA1, NUP54, SNRNP25, GEMIN7,<br>UBE2V1, MTFR2, DTL, RHNO1, HDAC5,<br>CDCA3, UHRF2, NOLC1, GPS2, FOXK1,<br>PKMYT1, HDAC8, CENPA, ATXN3, CCNB1,<br>PPP4C, RBBP4, MAT2A, TAF1B, HLTf, E2F2,<br>RBBP9, E2F3, MCL1, MAP2K6, CTC1, CDT1,<br>CDKN2C, PPIL2, SETD1B, SEC16A, CBX2,<br>XRCC3, RPA1, HMGA2, UBE2A, UBOX5,<br>MYO1C, CENPH, CENPI, PRC1, PRKRA,<br>DNAJA3, KIF4A, TDP1, COPS2, UBA3, BAX,<br>NDUFAF1, CDK12, TRIM32, NUP37 |
|--|-------------------------------------------|------------|-----------------|----------|--------------------------------------------------------------------------------------------------------------------------------------------------------------------------------------------------------------------------------------------------------------------------------------------------------------------------------------------------------------------------------------------------------------------------------------------------------------------------------------------------------------------------------------------------------------------------------------------------------------------------------------------------------------------------------------------------------|

|                                   |            |                                       |          |                                                                                      |
|-----------------------------------|------------|---------------------------------------|----------|--------------------------------------------------------------------------------------|
| <b>KEGG Pathway</b>               | hsa04110   | Cell cycle                            | 7.27E-08 | RB1, RBL2, CCNB1, TFDP1, CDKN2C, RBL1, ESPL1, E2F2, E2F3, PKMYT1, CDC25C, RBX1       |
| <b>GO Term Biological Process</b> | GO:0007049 | cell cycle                            | 1.48E-06 | RBL2, TIPIN, CHAF1A, RBL1, UHRF2, RBBP4, NOLC1, APEX2, GPS2, E2F2, E2F3, ESCO2       |
| <b>GO Term Biological Process</b> | GO:0007067 | mitotic nuclear division              | 8.42E-06 | TIPIN, ANAPC15, CDCA3, CCNF, NOLC1, HMGA2, NEK2, KIF11, PKMYT1, CDC25C, CEP55, NUP37 |
| <b>GO Term Molecular Function</b> | GO:0061630 | ubiquitin protein ligase activity     | 1.47E-05 | PPIL2, UHRF2, UBE2T, HLTF, UBE2A, UBE2V1, UBE2Z, TRIM32, CCNB1IP1, RBX1              |
| <b>GO Term Biological Process</b> | GO:0000082 | G1/S transition of mitotic cell cycle | 2.74E-05 | RB1, DHFR, CDT1, POLA2, CDKN2C, RPA1, PKMYT1, IQGAP3                                 |

|  |                                           |            |                             |          |                                                                                                |
|--|-------------------------------------------|------------|-----------------------------|----------|------------------------------------------------------------------------------------------------|
|  | <b>GO Term<br/>Biological<br/>Process</b> | GO:0006281 | DNA repair                  | 3.30E-05 | MUS81, CHAF1A, MSH2, EME1, UBE2T,<br>TDP1, XRCC3, RPA1, RECQL, APEX2, UBE2A                    |
|  | <b>GO Term<br/>Biological<br/>Process</b> | GO:0051301 | cell division               | 4.00E-05 | RB1, TIPIN, ANAPC15, CDCA3, CCNF,<br>HMGA2, KIF11, CDC25C, CCNB1, PSRC1,<br>KIFC1, NEK2, NUP37 |
|  | <b>GO Term<br/>Biological<br/>Process</b> | GO:0006260 | DNA replication             | 5.98E-05 | CDT1, POLA2, TIPIN, CHAF1A, RBBP4,<br>RPA1, CDC25C, DTL, RHNO1                                 |
|  | <b>GO Term<br/>Molecular<br/>Function</b> | GO:0003697 | single-stranded DNA binding | 7.00E-05 | CTC1, MSH2, TDP1, XRCC3, RPA1, BRCA2,<br>RAD23B                                                |

|                                           |            |                               |          |                                                                                                                                                                                 |
|-------------------------------------------|------------|-------------------------------|----------|---------------------------------------------------------------------------------------------------------------------------------------------------------------------------------|
| <b>GO Term<br/>Molecular<br/>Function</b> | GO:0005524 | ATP binding                   | 1.13E-04 | MOCS3, NOLC1, UBE2D1, KIF11, PKMYT1, MKI67, UBE2Z, MAT2A, HLTf, PIP4K2B, NEK2, MAP2K6, XRCC3, RECQL, UBE2A, CLPX, MYO1C, DDX39A, MSH2, KIFC1, DNAJA3, KIF4A, UBE2T, UBA3, CDK12 |
| <b>GO Term<br/>Biological<br/>Process</b> | GO:0000209 | protein polyubiquitination    | 1.72E-04 | UBOX5, PPIL2, HLTf, UBE2D1, UBE2A, UBE2V1, DTL, TRIM32, RBX1                                                                                                                    |
| <b>GO Term<br/>Biological<br/>Process</b> | GO:0006302 | double-strand break repair    | 1.84E-04 | MSH2, EME1, TDP1, H2AFX, ESCO2, BRCA2                                                                                                                                           |
| <b>GO Term<br/>Biological<br/>Process</b> | GO:0006301 | postreplication repair        | 2.01E-04 | MSH2, HLTf, UBE2A, UBE2V1                                                                                                                                                       |
| <b>KEGG Pathway</b>                       | hsa03440   | Homologous recombination      | 2.48E-04 | MUS81, EME1, XRCC3, RPA1, BRCA2                                                                                                                                                 |
| <b>GO Term<br/>Biological<br/>Process</b> | GO:0031573 | intra-S DNA damage checkpoint | 2.54E-04 | MUS81, TIPIN, MSH2, EME1                                                                                                                                                        |

|  |                                           |            |                                  |          |                                                                                                                                                                                    |
|--|-------------------------------------------|------------|----------------------------------|----------|------------------------------------------------------------------------------------------------------------------------------------------------------------------------------------|
|  | <b>GO Term<br/>Molecular<br/>Function</b> | GO:0031625 | ubiquitin protein ligase binding | 3.44E-04 | RB1, ATXN3, UBOX5, UBE2T, HLTF, SUMO2,<br>UBE2A, UBE2V1, UBE2Z, RBX1                                                                                                               |
|  | <b>GO Term<br/>Molecular<br/>Function</b> | GO:0003677 | DNA binding                      | 3.51E-04 | MUS81, RB1, UHRF2, MKI67, CENPA, EME1,<br>HLTF, E2F2, E2F3, CDT1, TIPIN, CBX2,<br>H2AFX, XRCC3, RECQL, RPA1, HMGA2,<br>APEX2, RBL2, POLA2, PHF5A, TFDP1, MSH2,<br>KIF4A, HIST1H2BD |

|  |                                           |            |                                |          |                                                                                                                                                                                                                                                                                                                                                                                                       |
|--|-------------------------------------------|------------|--------------------------------|----------|-------------------------------------------------------------------------------------------------------------------------------------------------------------------------------------------------------------------------------------------------------------------------------------------------------------------------------------------------------------------------------------------------------|
|  | <b>GO Term<br/>Cellular<br/>Component</b> | GO:0005737 | cytoplasm                      | 3.86E-04 | UBE2D1, KIF11, BRCA2, MKI67, UBE2Z, TCHP, EME1, NEK2, TIPIN, CKAP2L, LANCL1, RECQL, RAD23B, CLPX, RBL2, DDX39A, PSRC1, ESPL1, SNRNP25, GEMIN7, UBE2V1, UMP5, DTL, HIST1H2BD, HDAC5, NOLC1, HDAC8, ATXN3, CCNB1, PPP4C, HLTF, RBBP9, E2F3, MCL1, MAP2K6, GINS1, CDKN2C, PPIL2, SETD1B, SEC16A, XRCC3, UBE2A, POLA2, MYO1C, CENPI, PRC1, PRKRA, DNAJA3, UBE2T, KIF4A, TDP1, COPS2, BAX, NDUFAF1, TRIM32 |
|  | <b>KEGG Pathway</b>                       | hsa04120   | Ubiquitin mediated proteolysis | 6.43E-04 | UBOX5, PPIL2, UBA3, UBE2D1, UBE2A, UBE2Z, TRIM32, RBX1                                                                                                                                                                                                                                                                                                                                                |



|  |                                           |            |                                     |          |                                                                                                                                                                                                                                                                                                     |
|--|-------------------------------------------|------------|-------------------------------------|----------|-----------------------------------------------------------------------------------------------------------------------------------------------------------------------------------------------------------------------------------------------------------------------------------------------------|
|  | <b>GO Term<br/>Biological<br/>Process</b> | GO:0016032 | viral process                       | 6.50E-04 | RB1, RBL1, H2AFX, BAX, NUP54, CDC25C, CENPA, TRIM23, RBX1, NUP37                                                                                                                                                                                                                                    |
|  | <b>GO Term<br/>Cellular<br/>Component</b> | GO:0005829 | cytosol                             | 7.64E-04 | MOCS3, ANAPC15, CDCA3, UBE2D1, KIF11, PKMYT1, HDAC8, CENPA, IQGAP3, ATXN3, CCNB1, MAT2A, KPNA4, PIP4K2B, NEK2, ENOPH1, MCL1, MAP2K6, CDT1, CDKN2C, SEC16A, UBE2A, CDC25C, RBX1, DHFR, MYO1C, PSRC1, ESPL1, CENPH, PRC1, CENPI, PRKRA, DNAJA3, KIF4A, UBA3, BAX, GEMIN7, UBE2V1, UMPS, TRIM32, NUP37 |
|  | <b>GO Term<br/>Biological<br/>Process</b> | GO:0043550 | regulation of lipid kinase activity | 8.19E-04 | RB1, RBL2, RBL1                                                                                                                                                                                                                                                                                     |

|                                           |            |                                                                                               |            |                                         |
|-------------------------------------------|------------|-----------------------------------------------------------------------------------------------|------------|-----------------------------------------|
| <b>GO Term<br/>Biological<br/>Process</b> | GO:0036297 | interstrand cross-link repair                                                                 | 8.82E-04   | MUS81, EME1, UBE2T, XRCC3, RPA1         |
| <b>GO Term<br/>Molecular<br/>Function</b> | GO:0001047 | core promoter binding                                                                         | 0.0010669  | RB1, HDAC5, HMGA2, E2F2, E2F3           |
| <b>GO Term<br/>Biological<br/>Process</b> | GO:0000070 | mitotic sister chromatid segregation                                                          | 0.00116393 | ESPL1, KIFC1, NEK2, CENPA               |
| <b>GO Term<br/>Biological<br/>Process</b> | GO:0007088 | regulation of mitotic nuclear division                                                        | 0.00116393 | NEK2, PKMYT1, MKI67, CDC25C             |
| <b>GO Term<br/>Molecular<br/>Function</b> | GO:0061631 | ubiquitin conjugating enzyme activity                                                         | 0.00190009 | UBE2T, UBE2D1, UBE2A, UBE2Z             |
| <b>GO Term<br/>Biological<br/>Process</b> | GO:0006977 | DNA damage response, signal transduction by p53 class mediator resulting in cell cycle arrest | 0.0020696  | RBL2, CCNB1, TFDP1, BAX, CDC25C         |
| <b>GO Term<br/>Cellular<br/>Component</b> | GO:0000922 | spindle pole                                                                                  | 0.00230082 | CCNB1, PSRC1, CKAP2L, PRC1, NEK2, KIF11 |
| <b>GO Term<br/>Molecular<br/>Function</b> | GO:0008821 | crossover junction endodeoxyribonuclease activity                                             | 0.00270352 | MUS81, EME1, XRCC3                      |
| <b>GO Term<br/>Biological<br/>Process</b> | GO:0000722 | telomere maintenance via recombination                                                        | 0.00307046 | POLA2, XRCC3, RPA1, BRCA2               |
| <b>KEGG Pathway</b>                       | hsa03460   | Fanconi anemia pathway                                                                        | 0.00307838 | MUS81, EME1, UBE2T, RPA1, BRCA2         |

|                                   |            |                                                         |            |                                                               |
|-----------------------------------|------------|---------------------------------------------------------|------------|---------------------------------------------------------------|
| <b>KEGG Pathway</b>               | hsa05203   | Viral carcinogenesis                                    | 0.00327146 | RB1, RBL2, HDAC5, RBL1, DNAJA3, BAX, HDAC8, HIST1H2BD         |
| <b>GO Term Biological Process</b> | GO:0006310 | DNA recombination                                       | 0.00329586 | MUS81, XRCC3, RPA1, RECQL, APEX2                              |
| <b>GO Term Molecular Function</b> | GO:0004842 | ubiquitin-protein transferase activity                  | 0.00344195 | PPIL2, UHRF2, UBE2T, UBE2D1, UBE2A, DTL, TRIM32, TRIM23, RBX1 |
| <b>GO Term Biological Process</b> | GO:0000724 | double-strand break repair via homologous recombination | 0.00347749 | H2AFX, XRCC3, RPA1, RECQL, BRCA2                              |
| <b>GO Term Biological Process</b> | GO:0007080 | mitotic metaphase plate congression                     | 0.0043043  | CCNB1, PSRC1, KIFC1, CEP55                                    |
| <b>GO Term Biological Process</b> | GO:0042769 | DNA damage response, detection of DNA damage            | 0.0043043  | RPA1, HMGA2, DTL, RBX1                                        |
| <b>GO Term Molecular Function</b> | GO:0016874 | ligase activity                                         | 0.00458147 | UBOX5, PPIL2, UHRF2, HLTF, TRIM32, CCNB1IP1, TRIM23, RBX1     |
| <b>GO Term Biological Process</b> | GO:0034080 | CENP-A containing nucleosome assembly                   | 0.00465317 | CENPH, RBBP4, CENPI, CENPA                                    |

|                                           |            |                                                                                        |            |                                                        |
|-------------------------------------------|------------|----------------------------------------------------------------------------------------|------------|--------------------------------------------------------|
| <b>GO Term<br/>Cellular<br/>Component</b> | GO:0001741 | XY body                                                                                | 0.004861   | H2AFX, ESCO2, UBE2A                                    |
| <b>GO Term<br/>Biological<br/>Process</b> | GO:0006289 | nucleotide-excision repair                                                             | 0.00501867 | ATXN3, RPA1, BRCA2, RAD23B                             |
| <b>GO Term<br/>Biological<br/>Process</b> | GO:0009411 | response to UV                                                                         | 0.00501867 | TIPIN, UBE2A, DTL, TRIM32                              |
| <b>GO Term<br/>Molecular<br/>Function</b> | GO:0008134 | transcription factor binding                                                           | 0.00562557 | RB1, HDAC5, TFDP1, RBL1, DNAJA3,<br>HMGA2, E2F2, HDAC8 |
| <b>GO Term<br/>Molecular<br/>Function</b> | GO:0034450 | ubiquitin-ubiquitin ligase activity                                                    | 0.00572343 | UBOX5, PPIL2, RBX1                                     |
| <b>GO Term<br/>Cellular<br/>Component</b> | GO:0005876 | spindle microtubule                                                                    | 0.00607151 | PSRC1, PRC1, KIF4A, KIF11                              |
| <b>GO Term<br/>Cellular<br/>Component</b> | GO:0005694 | chromosome                                                                             | 0.00804355 | KIF4A, SETD1B, RECQL, DTL, RHNO1                       |
| <b>GO Term<br/>Biological<br/>Process</b> | GO:0006974 | cellular response to DNA damage<br>stimulus                                            | 0.00822449 | CTC1, TIPIN, DDX39A, UBE2T, H2AFX,<br>XRCC3, DTL       |
| <b>GO Term<br/>Biological<br/>Process</b> | GO:0042787 | protein ubiquitination involved in<br>ubiquitin-dependent protein<br>catabolic process | 0.00928422 | CCNB1, ANAPC15, UBE2D1, UBE2Z, TRIM32,<br>RBX1         |

|                                           |            |                                                                               |            |                                          |
|-------------------------------------------|------------|-------------------------------------------------------------------------------|------------|------------------------------------------|
| <b>GO Term<br/>Biological<br/>Process</b> | GO:0007062 | sister chromatid cohesion                                                     | 0.0120933  | CENPH, CENPI, HDAC8, CENPA, NUP37        |
| <b>GO Term<br/>Biological<br/>Process</b> | GO:0010629 | negative regulation of gene expression                                        | 0.01295809 | RB1, RBL2, CCNB1, RBL1, IQGAP3           |
| <b>GO Term<br/>Biological<br/>Process</b> | GO:0016569 | covalent chromatin modification                                               | 0.01386146 | RB1, RBL2, RBL1, CBX2, HLTF              |
| <b>GO Term<br/>Biological<br/>Process</b> | GO:0000083 | regulation of transcription involved in G1/S transition of mitotic cell cycle | 0.01423304 | RB1, DHFR, CDT1                          |
| <b>GO Term<br/>Molecular<br/>Function</b> | GO:0003684 | damaged DNA binding                                                           | 0.01477205 | MSH2, H2AFX, RPA1, RAD23B                |
| <b>GO Term<br/>Cellular<br/>Component</b> | GO:0005819 | spindle                                                                       | 0.01602729 | RB1, PSRC1, KIFC1, PRC1, KIF11           |
| <b>GO Term<br/>Cellular<br/>Component</b> | GO:0000784 | nuclear chromosome, telomeric region                                          | 0.01602729 | CTC1, MSH2, XRCC3, RPA1, BRCA2           |
| <b>GO Term<br/>Cellular<br/>Component</b> | GO:0000790 | nuclear chromatin                                                             | 0.01608572 | TIPIN, CHAF1A, RBBP4, EME1, H2AFX, UBE2A |
| <b>GO Term<br/>Molecular<br/>Function</b> | GO:0004518 | nuclease activity                                                             | 0.01609262 | MUS81, EME1, APEX2                       |
| <b>GO Term<br/>Biological<br/>Process</b> | GO:0016925 | protein sumoylation                                                           | 0.01680851 | CBX2, SUMO2, RPA1, NUP54, NUP37          |

|                                           |            |                                                                                      |            |                                                             |
|-------------------------------------------|------------|--------------------------------------------------------------------------------------|------------|-------------------------------------------------------------|
| <b>GO Term<br/>Biological<br/>Process</b> | GO:0033262 | regulation of nuclear cell cycle<br>DNA replication                                  | 0.01827161 | CDT1, TIPIN                                                 |
| <b>GO Term<br/>Biological<br/>Process</b> | GO:0051439 | regulation of ubiquitin-protein<br>ligase activity involved in mitotic<br>cell cycle | 0.01861764 | CCNB1, ANAPC15, UBE2D1                                      |
| <b>GO Term<br/>Biological<br/>Process</b> | GO:0007131 | reciprocal meiotic recombination                                                     | 0.01861764 | MSH2, XRCC3, CCNB1IP1                                       |
| <b>GO Term<br/>Biological<br/>Process</b> | GO:0000715 | nucleotide-excision repair, DNA<br>damage recognition                                | 0.01861764 | COPS2, RAD23B, RBX1                                         |
| <b>GO Term<br/>Biological<br/>Process</b> | GO:0007283 | spermatogenesis                                                                      | 0.01950385 | CCNB1, KIFC1, H2AFX, HMGA2, BRCA2,<br>CDC25C, RAD23B        |
| <b>GO Term<br/>Biological<br/>Process</b> | GO:0006513 | protein monoubiquitination                                                           | 0.02181598 | UBE2T, DTL, RBX1                                            |
| <b>GO Term<br/>Biological<br/>Process</b> | GO:0000281 | mitotic cytokinesis                                                                  | 0.02181598 | KIF4A, CENPA, CEP55                                         |
| <b>GO Term<br/>Molecular<br/>Function</b> | GO:0019901 | protein kinase binding                                                               | 0.02240305 | CCNB1, CDKN2C, MSH2, PRC1, DNAJA3,<br>KIF11, CDC25C, MAP2K6 |
| <b>GO Term<br/>Cellular<br/>Component</b> | GO:0030496 | midbody                                                                              | 0.02259074 | PSRC1, PRC1, KIF4A, NEK2, CEP55                             |

|                                   |            |                                                                   |            |                                             |
|-----------------------------------|------------|-------------------------------------------------------------------|------------|---------------------------------------------|
| <b>KEGG Pathway</b>               | hsa04114   | Oocyte meiosis                                                    | 0.02328026 | CCNB1, ESPL1, PKMYT1, CDC25C, RBX1          |
| <b>GO Term Molecular Function</b> | GO:0030544 | Hsp70 protein binding                                             | 0.02376055 | DNAJA3, BAX, HDAC8                          |
| <b>GO Term Cellular Component</b> | GO:0033186 | CAF-1 complex                                                     | 0.02639373 | CHAF1A, RBBP4                               |
| <b>GO Term Cellular Component</b> | GO:0097136 | Bcl-2 family protein complex                                      | 0.02639373 | BAX, MCL1                                   |
| <b>GO Term Biological Process</b> | GO:0006294 | nucleotide-excision repair, preincision complex assembly          | 0.02883372 | RPA1, RAD23B, RBX1                          |
| <b>GO Term Biological Process</b> | GO:0043161 | proteasome-mediated ubiquitin-dependent protein catabolic process | 0.02934733 | ATXN3, ANAPC15, UBE2D1, UBE2A, RAD23B, RBX1 |
| <b>KEGG Pathway</b>               | hsa05212   | Pancreatic cancer                                                 | 0.03031852 | RB1, E2F2, E2F3, BRCA2                      |
| <b>GO Term Cellular Component</b> | GO:0000776 | kinetochore                                                       | 0.03201195 | CENPH, CENPI, NEK2, NUP37                   |
| <b>GO Term Cellular Component</b> | GO:0005667 | transcription factor complex                                      | 0.03281361 | RBL2, TFDP1, RBL1, E2F2, E2F3               |
| <b>GO Term Biological Process</b> | GO:0070911 | global genome nucleotide-excision repair                          | 0.03460724 | SUMO2, RAD23B, RBX1                         |

|                                           |            |                                                                 |            |                                                                              |
|-------------------------------------------|------------|-----------------------------------------------------------------|------------|------------------------------------------------------------------------------|
| <b>GO Term<br/>Molecular<br/>Function</b> | GO:0051434 | BH3 domain binding                                              | 0.0350813  | BAX, MCL1                                                                    |
| <b>GO Term<br/>Biological<br/>Process</b> | GO:0071922 | regulation of cohesin loading                                   | 0.03621248 | RB1, HDAC8                                                                   |
| <b>GO Term<br/>Biological<br/>Process</b> | GO:0071459 | protein localization to<br>chromosome, centromeric region       | 0.03621248 | RB1, CENPA                                                                   |
| <b>GO Term<br/>Biological<br/>Process</b> | GO:0090266 | regulation of mitotic cell cycle<br>spindle assembly checkpoint | 0.03621248 | CCNB1, ANAPC15                                                               |
| <b>GO Term<br/>Biological<br/>Process</b> | GO:0046602 | regulation of mitotic centrosome<br>separation                  | 0.03621248 | NEK2, KIF11                                                                  |
| <b>GO Term<br/>Biological<br/>Process</b> | GO:0072429 | response to intra-S DNA damage<br>checkpoint signaling          | 0.03621248 | MUS81, EME1                                                                  |
| <b>GO Term<br/>Molecular<br/>Function</b> | GO:0031492 | nucleosomal DNA binding                                         | 0.0364867  | RBBP4, HMGA2, CENPA                                                          |
| <b>GO Term<br/>Biological<br/>Process</b> | GO:0090307 | mitotic spindle assembly                                        | 0.0366235  | KIFC1, NEK2, KIF11                                                           |
| <b>GO Term<br/>Molecular<br/>Function</b> | GO:0042802 | identical protein binding                                       | 0.03699134 | RB1, ATXN3, CHAF1A, DDX39A, MAT2A,<br>PRC1, PRKRA, UBA3, BAX, TRIM32, TRIM23 |



|                                           |            |                                                                               |            |                                                                                            |
|-------------------------------------------|------------|-------------------------------------------------------------------------------|------------|--------------------------------------------------------------------------------------------|
| <b>GO Term<br/>Biological<br/>Process</b> | GO:0006325 | chromatin organization                                                        | 0.038684   | HDAC5, HMGA2, HDAC8                                                                        |
| <b>GO Term<br/>Biological<br/>Process</b> | GO:0000079 | regulation of cyclin-dependent<br>protein serine/threonine kinase<br>activity | 0.038684   | CDKN2C, PKMYT1, CDC25C                                                                     |
| <b>GO Term<br/>Cellular<br/>Component</b> | GO:0005730 | nucleolus                                                                     | 0.03936401 | MUS81, NOLC1, APEX2, MKI67, RBL2,<br>MYO1C, CHAF1A, EME1, HLTF, RBBP9,<br>NEK2, CDK12, DTL |
| <b>GO Term<br/>Molecular<br/>Function</b> | GO:0004407 | histone deacetylase activity                                                  | 0.04051009 | HDAC5, RBBP4, HDAC8                                                                        |
| <b>GO Term<br/>Biological<br/>Process</b> | GO:0006284 | base-excision repair                                                          | 0.04078777 | RPA1, APEX2, HMGA2                                                                         |
| <b>GO Term<br/>Cellular<br/>Component</b> | GO:0000785 | chromatin                                                                     | 0.04214706 | RB1, HMGA2, ESCO2, UBE2A                                                                   |
| <b>GO Term<br/>Cellular<br/>Component</b> | GO:0031465 | Cul4B-RING E3 ubiquitin ligase<br>complex                                     | 0.04360491 | DTL, RBX1                                                                                  |
| <b>GO Term<br/>Cellular<br/>Component</b> | GO:0048476 | Holliday junction resolvase<br>complex                                        | 0.04360491 | MUS81, EME1                                                                                |
| <b>GO Term<br/>Molecular<br/>Function</b> | GO:0016887 | ATPase activity                                                               | 0.04366366 | DDX39A, MSH2, KIFC1, HLTF, CLPX                                                            |

|   |                                           |            |                                               |            |                                                                                                                                                                                                                                                                    |
|---|-------------------------------------------|------------|-----------------------------------------------|------------|--------------------------------------------------------------------------------------------------------------------------------------------------------------------------------------------------------------------------------------------------------------------|
|   | <b>GO Term<br/>Biological<br/>Process</b> | GO:0031052 | chromosome breakage                           | 0.04506076 | HMGA2, BRCA2                                                                                                                                                                                                                                                       |
|   | <b>GO Term<br/>Biological<br/>Process</b> | GO:0070345 | negative regulation of fat cell proliferation | 0.04506076 | TFDP1, E2F3                                                                                                                                                                                                                                                        |
|   | <b>GO Term<br/>Molecular<br/>Function</b> | GO:0051082 | unfolded protein binding                      | 0.04722391 | CHAF1A, DNAJA3, NDUFAF1, CLPX                                                                                                                                                                                                                                      |
| 6 | <b>GO Term<br/>Cellular<br/>Component</b> | GO:0005730 | nucleolus                                     | 2.38E-10   | DDX28, INO80B, INO80E, NIP7, RRP1, PPAN, MRI1, RRP8, ZNRD1, ENC1, WBSR22, RRS1, FAM21A, RPP14, LYAR, EXOSC2, N4BP1, UTP14C, TOE1, NOM1, TRIM41, NIFK, NOP16, METTL1, CCDC137, IMP3, DDX31, AEN, BYSL, RCN2, CDKN2AIPNL, POLR1A, TAOK2, NHP2, CCDC86, POLR3K, RPS23 |

|  |                                           |            |                     |          |                                                                                                                                                                                                                                                                                        |
|--|-------------------------------------------|------------|---------------------|----------|----------------------------------------------------------------------------------------------------------------------------------------------------------------------------------------------------------------------------------------------------------------------------------------|
|  | <b>GO Term<br/>Molecular<br/>Function</b> | GO:0044822 | poly(A) RNA binding | 1.00E-07 | DDX28, KHDRBS3, DQX1, SF3B6, RTCA, NIP7, EIF4A3, RRP1, PPAN, RPS27L, RRP8, RRP7A, RPS15A, DHX35, WBSR22, RRS1, IGF2BP3, LYAR, RPS12, APOBEC3C, NOM1, TRMT10C, NIFK, NOP16, CCDC137, IMP3, DDX55, DDX31, MRPL28, DDX10, RPP25L, BYSL, MRPL44, CCDC9, NHP2, CCDC86, RPL27, SRFBP1, RPS23 |
|  | <b>GO Term<br/>Biological<br/>Process</b> | GO:0006364 | rRNA processing     | 1.31E-07 | IMP3, EIF4A3, RRP1, RPS27L, RRP8, BYSL, RRP7A, RPS15A, CCDC86, RPL27, RPP14, EXOSC2, RPL39, RPS23, UTP14C, RPS12                                                                                                                                                                       |

|  |                                   |            |                                       |          |                                                                                                  |
|--|-----------------------------------|------------|---------------------------------------|----------|--------------------------------------------------------------------------------------------------|
|  | <b>KEGG Pathway</b>               | hsa03010   | Ribosome                              | 6.28E-06 | RPS15A, MRPL19, MRPS18A, RPS27L, MRPL28, RPL27, MRPL34, RPL39, RPS23, RPS12                      |
|  | <b>KEGG Pathway</b>               | hsa03020   | RNA polymerase                        | 1.48E-05 | ZNRD1, POLR1A, POLR1C, POLR2H, POLR3K, POLR2L                                                    |
|  | <b>GO Term Molecular Function</b> | GO:0004004 | ATP-dependent RNA helicase activity   | 1.70E-05 | DDX28, DDX59, DDX55, DHX35, DQX1, EIF4A3, DDX31, DDX10                                           |
|  | <b>GO Term Molecular Function</b> | GO:0001054 | RNA polymerase I activity             | 1.93E-05 | ZNRD1, POLR1A, POLR1C, POLR2H, POLR2L                                                            |
|  | <b>GO Term Cellular Component</b> | GO:0005736 | DNA-directed RNA polymerase I complex | 2.73E-05 | ZNRD1, POLR1A, POLR1C, POLR2H, POLR2L                                                            |
|  | <b>KEGG Pathway</b>               | hsa00240   | Pyrimidine metabolism                 | 4.25E-05 | POLD3, ZNRD1, POLR1A, POLR1C, CTPS1, POLR2H, POLR3K, POLR2L                                      |
|  | <b>GO Term Biological Process</b> | GO:0006412 | translation                           | 8.99E-05 | MRPL19, MRPS18A, MRPL28, RPS27L, MRPL34, RPS15A, NHP2, GUF1, RPL27, IGF2BP3, RPL39, RPS23, RPS12 |

|  |                                           |            |                                      |          |                                                                                                                                  |
|--|-------------------------------------------|------------|--------------------------------------|----------|----------------------------------------------------------------------------------------------------------------------------------|
|  | <b>GO Term<br/>Molecular<br/>Function</b> | GO:0003735 | structural constituent of ribosome   | 1.56E-04 | RPS15A, IMP3, MRPL19, MRPS18A, RPS27L, MRPL28, RPL27, MRPL34, RPL39, MRPL46, RPS23, RPS12                                        |
|  | <b>GO Term<br/>Molecular<br/>Function</b> | GO:0003899 | DNA-directed RNA polymerase activity | 1.58E-04 | ZNRD1, POLR1A, POLR1C, POLR2H, POLR3K, POLR2L                                                                                    |
|  | <b>GO Term<br/>Biological<br/>Process</b> | GO:0010501 | RNA secondary structure unwinding    | 1.69E-04 | DDX28, DDX59, DDX55, EIF4A3, DDX31, DDX10                                                                                        |
|  | <b>GO Term<br/>Molecular<br/>Function</b> | GO:0003723 | RNA binding                          | 2.77E-04 | NOM1, DDX59, KHDRBS3, NIFK, DDX55, RTCA, NIP7, THUMPD2, DDX31, DDX10, PUS7L, RPS15A, PPP1R8, NHP2, IGF2BP3, RPP14, EXOSC2, RPL39 |
|  | <b>GO Term<br/>Cellular<br/>Component</b> | GO:0030687 | preribosome, large subunit precursor | 4.22E-04 | NIP7, RRP1, PPAN, RRS1, CCDC86                                                                                                   |
|  | <b>GO Term<br/>Biological<br/>Process</b> | GO:0006400 | tRNA modification                    | 4.23E-04 | QTRT1, CTU1, METTL1, CDK5RAP1, TRIT1                                                                                             |

|                                   |            |                                                         |            |                                          |
|-----------------------------------|------------|---------------------------------------------------------|------------|------------------------------------------|
| <b>GO Term Biological Process</b> | GO:0006362 | transcription elongation from RNA polymerase I promoter | 6.51E-04   | ZNRD1, POLR1A, POLR1C, POLR2H, POLR2L    |
| <b>GO Term Biological Process</b> | GO:0006363 | termination of RNA polymerase I transcription           | 7.43E-04   | ZNRD1, POLR1A, POLR1C, POLR2H, POLR2L    |
| <b>KEGG Pathway</b>               | hsa03008   | Ribosome biogenesis in eukaryotes                       | 9.06E-04   | RRP7A, IMP3, NHP2, NOP10, RPP25L, UTP14C |
| <b>GO Term Biological Process</b> | GO:0006383 | transcription from RNA polymerase III promoter          | 9.54E-04   | POLR1C, SNAPC4, POLR2H, POLR3K, POLR2L   |
| <b>GO Term Biological Process</b> | GO:0006361 | transcription initiation from RNA polymerase I promoter | 9.54E-04   | ZNRD1, POLR1A, POLR1C, POLR2H, POLR2L    |
| <b>GO Term Cellular Component</b> | GO:0005666 | DNA-directed RNA polymerase III complex                 | 0.00206876 | POLR1C, POLR2H, POLR3K, POLR2L           |
| <b>GO Term Molecular Function</b> | GO:0001056 | RNA polymerase III activity                             | 0.00207999 | POLR1C, POLR2H, POLR3K, POLR2L           |
| <b>GO Term Cellular Component</b> | GO:0022627 | cytosolic small ribosomal subunit                       | 0.00308435 | RPS15A, MRPS18A, RPS27L, RPS23, RPS12    |
| <b>GO Term Biological Process</b> | GO:0045815 | positive regulation of gene expression, epigenetic      | 0.00343619 | ZNRD1, POLR1A, POLR1C, POLR2H, POLR2L    |

|  |                                   |            |                                         |            |                                                                                                                                                             |
|--|-----------------------------------|------------|-----------------------------------------|------------|-------------------------------------------------------------------------------------------------------------------------------------------------------------|
|  | <b>KEGG Pathway</b>               | hsa00230   | Purine metabolism                       | 0.00362044 | POLD3, ZNRD1, POLR1A, POLR1C, POLR2H, POLR3K, POLR2L                                                                                                        |
|  | <b>KEGG Pathway</b>               | hsa04623   | Cytosolic DNA-sensing pathway           | 0.005803   | POLR1C, POLR2H, POLR3K, POLR2L                                                                                                                              |
|  | <b>GO Term Biological Process</b> | GO:0070125 | mitochondrial translational elongation  | 0.00622269 | MRPL19, MRPS18A, MRPL28, MRPL34, MRPL46, MRPL44                                                                                                             |
|  | <b>GO Term Biological Process</b> | GO:0070126 | mitochondrial translational termination | 0.0068666  | MRPL19, MRPS18A, MRPL28, MRPL34, MRPL46, MRPL44                                                                                                             |
|  | <b>GO Term Cellular Component</b> | GO:0005840 | ribosome                                | 0.00753936 | RPS15A, MRPL19, MRPS18A, RPS27L, RPL27, MRPL34, RPS23, MRPL44                                                                                               |
|  | <b>GO Term Molecular Function</b> | GO:0003676 | nucleic acid binding                    | 0.01022307 | TOE1, ZNF473, DDX59, NIFK, DDX55, EIF4A3, AEN, TRIT1, ZNRD1, DHX35, R3HCC1, ZNF514, ZNF777, IGF2BP3, ZNF788, ZNF557, ZNF358, ZNF445, POLR3K, ZNF101, ZNF574 |
|  | <b>GO Term Biological Process</b> | GO:0045116 | protein neddylation                     | 0.01156072 | UBE2F, DCUN1D3, RNF7                                                                                                                                        |

|  |                                           |            |                              |            |                                                                                                         |
|--|-------------------------------------------|------------|------------------------------|------------|---------------------------------------------------------------------------------------------------------|
|  | <b>GO Term<br/>Cellular<br/>Component</b> | GO:0071203 | WASH complex                 | 0.01248247 | KIAA0196, FAM21A, WASH2P                                                                                |
|  | <b>GO Term<br/>Cellular<br/>Component</b> | GO:0005743 | mitochondrial inner membrane | 0.01522404 | NDUFA8, TIMM9, MRPL19, MRPS18A,<br>MRPL28, MRPL34, MRPL46, FOXRED1,<br>ATP5L, MRPL44, MPC1, GUF1, SFXN4 |



|  |                                           |            |                                                                     |            |                                                                                                                                                                                                                                                                                                                                                                      |
|--|-------------------------------------------|------------|---------------------------------------------------------------------|------------|----------------------------------------------------------------------------------------------------------------------------------------------------------------------------------------------------------------------------------------------------------------------------------------------------------------------------------------------------------------------|
|  | <b>GO Term<br/>Cellular<br/>Component</b> | GO:0005654 | nucleoplasm                                                         | 0.01904556 | GMEB2, RTCA, EIF4A3, RRP8, PIDD1, ZNRD1, ENC1, SNAPC4, RPS12, METTL1, IMP3, AEN, CDYL, MRPL46, ZHX1, DMTF1, POLR1A, KCTD10, POLR1C, NHP2, GEMIN6, ZNF473, KHDRBS3, SF3B6, RPS27L, RNF7, RRP7A, POLD3, EIF1AD, RPS15A, PPP1R8, WBSCR22, RPRD1B, POLR2H, RPP14, EXOSC2, ZBED5, POLR2L, TOE1, TRMT10C, BRF2, NIFK, GINS4, BYSL, CDKN2AIPNL, POLR3K, CENPQ, NOP10, RPS23 |
|  | <b>GO Term<br/>Biological<br/>Process</b> | GO:0032481 | positive regulation of type I interferon production                 | 0.0190886  | POLR1C, POLR2H, POLR3K, POLR2L                                                                                                                                                                                                                                                                                                                                       |
|  | <b>GO Term<br/>Biological<br/>Process</b> | GO:0000184 | nuclear-transcribed mRNA catabolic process, nonsense-mediated decay | 0.01920502 | RPS15A, EIF4A3, RPL27, RPL39, RPS23, RPS12                                                                                                                                                                                                                                                                                                                           |

|                                           |            |                                       |            |                                                                                                                                                                                                             |
|-------------------------------------------|------------|---------------------------------------|------------|-------------------------------------------------------------------------------------------------------------------------------------------------------------------------------------------------------------|
| <b>GO Term<br/>Cellular<br/>Component</b> | GO:0005739 | mitochondrion                         | 0.0198851  | DDX28, TIMM9, MRPL34, CISD3, FOXRED1, ATP5L, POLD3, RPS15A, GM2A, MPC1, CA5A, CDK5RAP1, RPP14, C14ORF159, HEMK1, NDUFA8, NDFIP2, TRMT10C, C14ORF119, ATP1F1, CMC1, MRPL28, MRPL46, TRIT1, CTU1, GUF1, PGAM5 |
| <b>KEGG Pathway</b>                       | hsa03013   | RNA transport                         | 0.0212738  | ELAC1, EIF4A3, GEMIN6, GEMIN8, RPP14, RPP25L                                                                                                                                                                |
| <b>GO Term<br/>Biological<br/>Process</b> | GO:0070900 | mitochondrial tRNA modification       | 0.02760283 | CDK5RAP1, TRIT1                                                                                                                                                                                             |
| <b>GO Term<br/>Biological<br/>Process</b> | GO:0031120 | snRNA pseudouridine synthesis         | 0.02760283 | NHP2, NOP10                                                                                                                                                                                                 |
| <b>GO Term<br/>Cellular<br/>Component</b> | GO:0005762 | mitochondrial large ribosomal subunit | 0.03199537 | MRPL19, MRPL28, MRPL34, MRPL46                                                                                                                                                                              |
| <b>GO Term<br/>Biological<br/>Process</b> | GO:0006413 | translational initiation              | 0.0320004  | EIF1AD, RPS15A, RPL27, RPL39, RPS23, RPS12                                                                                                                                                                  |

|  |                                  |            |         |            |                                                                                                                                                                                                                                                                                                                                                                                                                                                                                                                                                               |
|--|----------------------------------|------------|---------|------------|---------------------------------------------------------------------------------------------------------------------------------------------------------------------------------------------------------------------------------------------------------------------------------------------------------------------------------------------------------------------------------------------------------------------------------------------------------------------------------------------------------------------------------------------------------------|
|  | GO Term<br>Cellular<br>Component | GO:0005634 | nucleus | 0.03353395 | GMEB2, PHF23, RTCA, RRP1, PPAN, RRP8, EEF1B2, PIDD1, ENC1, SNAPC4, ZNF445, NOM1, DDX59, METTL1, IMP3, VBP1, ELAC1, AEN, CDYL, ZHX1, RPP25L, MRPL44, CAMKMT, PHF20L1, QTRT1, RNF126, LATS2, DMTF1, POLR1A, ZNF514, CCDC86, RPL27, GEMIN6, SRFBP1, ZNF557, ZNF358, GEMIN8, DDX28, INO80B, INO80E, KHDRBS3, INO80D, NIP7, MRPL19, RPS27L, RNF7, SAV1, POLD3, EIF1AD, PPP1R8, RRS1, IGF2BP3, ZNF788, RPRD1B, POLR2H, RPP14, LYAR, EXOSC2, POLR2L, ZNF101, UBE2F, APOBEC3C, SPECC1, TOE1, NOP16, GINS4, BYSL, UFM1, SLC7A6OS, PITHD1, TAOK2, ZNF777, NOP10, ZNF574 |
|--|----------------------------------|------------|---------|------------|---------------------------------------------------------------------------------------------------------------------------------------------------------------------------------------------------------------------------------------------------------------------------------------------------------------------------------------------------------------------------------------------------------------------------------------------------------------------------------------------------------------------------------------------------------------|

|                                           |            |                                                                         |            |                                    |
|-------------------------------------------|------------|-------------------------------------------------------------------------|------------|------------------------------------|
| <b>GO Term<br/>Cellular<br/>Component</b> | GO:0031463 | Cul3-RING ubiquitin ligase complex                                      | 0.0337299  | KCTD10, KLHL26, ENC1, RNF7         |
| <b>GO Term<br/>Biological<br/>Process</b> | GO:0006614 | SRP-dependent cotranslational protein targeting to membrane             | 0.03530488 | RPS15A, RPL27, RPL39, RPS23, RPS12 |
| <b>GO Term<br/>Biological<br/>Process</b> | GO:0031146 | SCF-dependent proteasomal ubiquitin-dependent protein catabolic process | 0.03696371 | FBXO4, RNF7, FBXO9                 |
| <b>GO Term<br/>Biological<br/>Process</b> | GO:0031398 | positive regulation of protein ubiquitination                           | 0.03901039 | NDFIP2, NDFIP1, PHF23, FBXO4       |
| <b>GO Term<br/>Biological<br/>Process</b> | GO:0045903 | positive regulation of translational fidelity                           | 0.04111898 | IMP3, CDK5RAP1                     |
| <b>GO Term<br/>Biological<br/>Process</b> | GO:0031118 | rRNA pseudouridine synthesis                                            | 0.04111898 | NHP2, NOP10                        |
| <b>GO Term<br/>Cellular<br/>Component</b> | GO:0031429 | box H/ACA snoRNP complex                                                | 0.04277136 | NHP2, NOP10                        |
| <b>GO Term<br/>Cellular<br/>Component</b> | GO:0072589 | box H/ACA scaRNP complex                                                | 0.04277136 | NHP2, NOP10                        |
| <b>GO Term<br/>Cellular<br/>Component</b> | GO:0090661 | box H/ACA telomerase RNP complex                                        | 0.04277136 | NHP2, NOP10                        |
| <b>GO Term<br/>Molecular<br/>Function</b> | GO:0034513 | box H/ACA snoRNA binding                                                | 0.04286212 | NHP2, NOP10                        |

|  |                                           |            |                                    |            |                   |
|--|-------------------------------------------|------------|------------------------------------|------------|-------------------|
|  | <b>GO Term<br/>Biological<br/>Process</b> | GO:0042273 | ribosomal large subunit biogenesis | 0.04337819 | NOP16, NIP7, RRS1 |
|--|-------------------------------------------|------------|------------------------------------|------------|-------------------|

**Table S13.** Expression data of regulated genes by miR-512-3p. Direct predicted miRNA targets are highlighted in orange.

| Ensembl ID      | Gene name | M-miR-512-3p (Sorafenib-Control) |                                |           |           | Transfection Control (Sorafenib-Control) |                                |           |           |
|-----------------|-----------|----------------------------------|--------------------------------|-----------|-----------|------------------------------------------|--------------------------------|-----------|-----------|
|                 |           | Base mean                        | log <sub>2</sub> (Fold-Change) | p-value   | p-adj     | Base mean                                | log <sub>2</sub> (Fold-Change) | p-value   | p-adj     |
| ENSG00000146678 | IGFBP1    | 1875.283                         | -3.353                         | 4.747E-44 | 5.510E-41 | 224.846                                  | 0.108                          | 7.449E-01 | 8.937E-01 |
| ENSG00000134057 | CCNB1     | 377.193                          | -1.759                         | 6.718E-12 | 1.033E-09 | 501.523                                  | -0.140                         | 5.618E-01 | 7.999E-01 |
| ENSG00000204444 | APOM      | 589.692                          | -1.476                         | 6.812E-12 | 1.035E-09 | 373.720                                  | -0.266                         | 2.229E-01 | 5.276E-01 |
| ENSG00000250722 | SELENOP   | 3485.870                         | -1.534                         | 2.239E-11 | 3.142E-09 | 1868.120                                 | -0.205                         | 2.675E-01 | 5.775E-01 |
| ENSG00000104419 | NDRG1     | 501.022                          | -1.483                         | 5.081E-11 | 6.553E-09 | 218.608                                  | -0.188                         | 4.316E-01 | 7.177E-01 |
| ENSG00000184232 | OAF       | 938.575                          | -1.365                         | 2.028E-10 | 2.332E-08 | 511.316                                  | -0.333                         | 1.378E-01 | 4.195E-01 |
| ENSG00000113083 | LOX       | 31.725                           | -3.040                         | 9.653E-10 | 9.860E-08 | 2.819                                    | -0.124                         | 6.858E-01 | NA        |
| ENSG00000006042 | TMEM98    | 824.962                          | -1.220                         | 4.029E-09 | 3.453E-07 | 772.599                                  | -0.448                         | 1.297E-02 | 1.142E-01 |
| ENSG00000121060 | TRIM25    | 475.873                          | -1.293                         | 1.802E-08 | 1.358E-06 | 426.720                                  | -0.448                         | 4.481E-02 | 2.297E-01 |
| ENSG00000149573 | MPZL2     | 589.376                          | -1.275                         | 1.809E-08 | 1.358E-06 | 478.439                                  | -0.066                         | 7.980E-01 | 9.188E-01 |
| ENSG00000074964 | ARHGEF10L | 577.055                          | -1.241                         | 2.236E-08 | 1.660E-06 | 319.662                                  | 0.117                          | 6.827E-01 | 8.639E-01 |
| ENSG00000126562 | WNK4      | 41.010                           | -2.580                         | 2.324E-08 | 1.703E-06 | 22.297                                   | -0.945                         | 2.321E-02 | NA        |
| ENSG00000107984 | DKK1      | 920.573                          | -1.559                         | 3.104E-08 | 2.226E-06 | 398.448                                  | -0.364                         | 3.832E-01 | 6.828E-01 |
| ENSG00000114491 | UMPS      | 395.040                          | -1.325                         | 4.760E-08 | 3.166E-06 | 329.663                                  | -0.452                         | 5.766E-02 | 2.633E-01 |
| ENSG00000102934 | PLLP      | 127.236                          | -1.679                         | 5.357E-08 | 3.490E-06 | 256.481                                  | 0.006                          | 9.861E-01 | 9.945E-01 |
| ENSG00000141401 | IMPA2     | 346.431                          | -1.387                         | 6.721E-08 | 4.227E-06 | 219.268                                  | -0.273                         | 2.963E-01 | 6.062E-01 |
| ENSG00000108924 | HLF       | 1340.476                         | -1.014                         | 1.771E-07 | 1.042E-05 | 1419.633                                 | -0.436                         | 1.697E-02 | 1.334E-01 |
| ENSG00000090615 | GOLGA3    | 495.130                          | -1.206                         | 1.901E-07 | 1.113E-05 | 465.573                                  | -0.362                         | 1.046E-01 | 3.618E-01 |
| ENSG00000116984 | MTR       | 269.922                          | -1.405                         | 6.060E-07 | 3.145E-05 | 254.507                                  | -0.327                         | 1.695E-01 | 4.641E-01 |
| ENSG00000122884 | P4HA1     | 715.148                          | -1.314                         | 6.371E-07 | 3.280E-05 | 482.906                                  | -0.492                         | 4.476E-02 | 2.297E-01 |
| ENSG00000056736 | IL17RB    | 289.476                          | -1.521                         | 8.862E-07 | 4.403E-05 | 185.297                                  | -0.078                         | 7.687E-01 | 9.051E-01 |
| ENSG00000178772 | CPN2      | 419.756                          | -1.115                         | 9.393E-07 | 4.630E-05 | 284.059                                  | -0.079                         | 7.296E-01 | 8.882E-01 |

|                 |         |          |        |           |           |          |        |           |           |
|-----------------|---------|----------|--------|-----------|-----------|----------|--------|-----------|-----------|
| ENSG00000116701 | NCF2    | 28.543   | 2.333  | 9.486E-07 | 4.658E-05 | 49.715   | 1.372  | 3.524E-04 | 1.085E-02 |
| ENSG00000175643 | RMI2    | 441.714  | -1.301 | 1.035E-06 | 4.995E-05 | 382.203  | -0.320 | 1.417E-01 | 4.260E-01 |
| ENSG00000064393 | HIPK2   | 611.331  | -1.218 | 1.037E-06 | 4.995E-05 | 888.612  | -0.385 | 3.538E-02 | 2.023E-01 |
| ENSG00000108960 | MMD     | 525.717  | -1.393 | 1.167E-06 | 5.540E-05 | 365.856  | -0.152 | 5.691E-01 | 8.042E-01 |
| ENSG00000158715 | SLC45A3 | 82.958   | -1.807 | 1.494E-06 | 6.835E-05 | 47.505   | -0.004 | 9.911E-01 | 9.966E-01 |
| ENSG00000177000 | MTHFR   | 35.803   | -2.292 | 1.542E-06 | 7.005E-05 | 29.191   | -1.431 | 4.584E-04 | 1.336E-02 |
| ENSG00000089057 | SLC23A2 | 353.382  | -1.234 | 1.575E-06 | 7.130E-05 | 370.068  | -0.233 | 2.642E-01 | 5.739E-01 |
| ENSG00000102081 | FMR1    | 417.915  | -1.140 | 2.554E-06 | 1.080E-04 | 366.241  | -0.449 | 4.162E-02 | 2.206E-01 |
| ENSG00000173218 | VANG1   | 144.859  | -1.488 | 3.454E-06 | 1.391E-04 | 113.391  | -0.492 | 1.370E-01 | 4.180E-01 |
| ENSG00000221303 | SNORA79 | 40.126   | -2.225 | 4.171E-06 | 1.628E-04 | 28.241   | -0.745 | 6.275E-02 | 2.750E-01 |
| ENSG00000121068 | TBX2    | 191.479  | -1.406 | 4.852E-06 | 1.855E-04 | 164.226  | -0.430 | 1.297E-01 | 4.063E-01 |
| ENSG00000100023 | PPIL2   | 152.356  | -1.320 | 4.904E-06 | 1.869E-04 | 150.779  | -0.424 | 1.527E-01 | 4.405E-01 |
| ENSG00000137642 | SORL1   | 345.242  | -1.304 | 5.032E-06 | 1.906E-04 | 249.346  | 0.353  | 1.886E-01 | 4.876E-01 |
| ENSG00000164733 | CTSB    | 1849.640 | -0.882 | 5.778E-06 | 2.151E-04 | 1635.400 | -0.402 | 3.734E-02 | 2.076E-01 |
| ENSG00000070214 | SLC44A1 | 635.860  | -1.241 | 7.716E-06 | 2.799E-04 | 546.276  | -0.237 | 2.881E-01 | 5.990E-01 |
| ENSG00000198265 | HELZ    | 371.056  | -1.079 | 8.508E-06 | 3.051E-04 | 442.222  | -0.118 | 5.668E-01 | 8.026E-01 |
| ENSG00000168906 | MAT2A   | 373.792  | -1.185 | 8.907E-06 | 3.150E-04 | 311.060  | -0.496 | 8.630E-02 | 3.250E-01 |
| ENSG00000135744 | AGT     | 4012.069 | -0.787 | 1.439E-05 | 4.652E-04 | 3829.611 | -0.499 | 5.436E-03 | 6.731E-02 |
| ENSG00000186205 | MARC1   | 302.756  | -1.218 | 1.634E-05 | 5.229E-04 | 166.574  | -0.474 | 9.734E-02 | 3.470E-01 |
| ENSG00000086696 | HSD17B2 | 104.029  | -1.450 | 1.664E-05 | 5.291E-04 | 61.675   | -0.396 | 2.720E-01 | 5.822E-01 |
| ENSG00000138413 | IDH1    | 1332.913 | -1.158 | 1.689E-05 | 5.352E-04 | 813.866  | -0.211 | 3.471E-01 | 6.533E-01 |
| ENSG00000143924 | EML4    | 4003.235 | -0.955 | 1.909E-05 | 5.931E-04 | 2569.758 | 0.297  | 1.579E-01 | 4.484E-01 |
| ENSG00000188257 | PLA2G2A | 199.582  | -1.255 | 2.006E-05 | 6.173E-04 | 53.757   | -0.246 | 5.367E-01 | 7.866E-01 |
| ENSG00000172986 | GXYLT2  | 107.158  | -1.394 | 2.069E-05 | 6.304E-04 | 135.080  | -0.123 | 6.867E-01 | 8.666E-01 |
| ENSG00000186918 | ZNF395  | 159.618  | -1.438 | 2.085E-05 | 6.339E-04 | 137.031  | -0.086 | 7.722E-01 | 9.067E-01 |
| ENSG00000178425 | NT5DC1  | 181.171  | -1.188 | 2.201E-05 | 6.645E-04 | 230.217  | -0.175 | 4.709E-01 | 7.462E-01 |

|                 |            |          |        |           |           |          |        |           |           |
|-----------------|------------|----------|--------|-----------|-----------|----------|--------|-----------|-----------|
| ENSG00000197142 | ACSL5      | 645.383  | -0.969 | 2.811E-05 | 8.067E-04 | 384.797  | -0.402 | 9.739E-02 | 3.471E-01 |
| ENSG00000179918 | SEPHS2     | 1283.098 | -0.931 | 3.343E-05 | 9.381E-04 | 1077.466 | -0.466 | 1.586E-02 | 1.290E-01 |
| ENSG00000100342 | APOL1      | 178.953  | -1.131 | 4.360E-05 | 1.172E-03 | 131.319  | -0.402 | 2.471E-01 | 5.552E-01 |
| ENSG00000090382 | LYZ        | 1341.213 | -0.919 | 4.491E-05 | 1.200E-03 | 756.630  | 0.061  | 7.724E-01 | 9.067E-01 |
| ENSG00000224870 | AL391244.1 | 166.984  | -1.192 | 4.605E-05 | 1.222E-03 | 181.659  | -0.361 | 1.867E-01 | 4.857E-01 |
| ENSG00000003436 | TFPI       | 1603.260 | -0.808 | 4.843E-05 | 1.278E-03 | 1417.713 | -0.187 | 2.779E-01 | 5.882E-01 |
| ENSG00000213903 | LTB4R      | 35.405   | -1.885 | 5.106E-05 | 1.339E-03 | 62.003   | -0.340 | 3.313E-01 | 6.389E-01 |
| ENSG00000179134 | SAMD4B     | 486.669  | -1.013 | 5.545E-05 | 1.439E-03 | 508.433  | 0.035  | 8.767E-01 | 9.525E-01 |
| ENSG00000185127 | C6orf120   | 89.506   | -1.363 | 5.675E-05 | 1.458E-03 | 83.519   | -0.414 | 2.324E-01 | 5.377E-01 |
| ENSG00000116017 | ARID3A     | 2584.696 | -0.840 | 6.030E-05 | 1.528E-03 | 1769.262 | -0.200 | 3.049E-01 | 6.153E-01 |
| ENSG00000103018 | CYB5B      | 808.104  | -0.822 | 6.215E-05 | 1.558E-03 | 724.567  | -0.082 | 6.585E-01 | 8.531E-01 |
| ENSG00000168040 | FADD       | 146.112  | -1.343 | 6.976E-05 | 1.719E-03 | 155.344  | -0.372 | 1.548E-01 | 4.433E-01 |
| ENSG00000012504 | NR1H4      | 314.354  | -0.978 | 7.411E-05 | 1.802E-03 | 189.810  | -0.426 | 1.095E-01 | 3.702E-01 |
| ENSG00000143252 | SDHC       | 461.842  | -1.217 | 7.948E-05 | 1.915E-03 | 445.350  | -0.200 | 4.328E-01 | 7.183E-01 |
| ENSG00000134575 | ACP2       | 203.811  | -1.236 | 8.055E-05 | 1.926E-03 | 164.139  | -0.481 | 1.290E-01 | 4.049E-01 |
| ENSG00000116406 | EDEM3      | 89.501   | -1.421 | 8.125E-05 | 1.935E-03 | 76.349   | -0.146 | 6.750E-01 | 8.602E-01 |
| ENSG00000163009 | C2orf48    | 30.293   | -1.907 | 8.179E-05 | 1.941E-03 | 29.106   | -0.379 | 3.584E-01 | 6.640E-01 |
| ENSG00000108384 | RAD51C     | 238.150  | -1.108 | 8.172E-05 | 1.941E-03 | 407.619  | 0.049  | 8.210E-01 | 9.280E-01 |
| ENSG00000144580 | CNOT9      | 352.653  | -0.916 | 8.215E-05 | 1.946E-03 | 649.761  | -0.147 | 4.493E-01 | 7.280E-01 |
| ENSG00000112146 | FBXO9      | 377.071  | -0.907 | 8.291E-05 | 1.957E-03 | 495.009  | -0.422 | 3.676E-02 | 2.063E-01 |
| ENSG00000166189 | HPS6       | 68.488   | -1.601 | 8.724E-05 | 2.036E-03 | 54.465   | -0.062 | 8.747E-01 | 9.523E-01 |
| ENSG00000272502 | AC104958.2 | 177.792  | -1.210 | 9.173E-05 | 2.115E-03 | 113.477  | -0.256 | 3.714E-01 | 6.746E-01 |
| ENSG00000102921 | N4BP1      | 247.714  | -0.986 | 9.175E-05 | 2.115E-03 | 307.386  | -0.399 | 1.108E-01 | 3.723E-01 |
| ENSG00000196502 | SULT1A1    | 885.596  | -1.006 | 9.604E-05 | 2.190E-03 | 635.202  | -0.495 | 6.131E-02 | 2.726E-01 |
| ENSG00000069702 | TGFBR3     | 536.259  | -0.967 | 9.656E-05 | 2.198E-03 | 238.091  | -0.367 | 2.295E-01 | 5.350E-01 |
| ENSG00000266412 | NCOA4      | 1640.545 | -0.784 | 1.003E-04 | 2.266E-03 | 1237.653 | -0.274 | 1.609E-01 | 4.513E-01 |



|                 |           |           |        |           |           |          |        |           |           |
|-----------------|-----------|-----------|--------|-----------|-----------|----------|--------|-----------|-----------|
| ENSG00000181035 | SLC25A42  | 163.847   | -1.340 | 1.049E-04 | 2.345E-03 | 66.751   | 0.098  | 7.856E-01 | 9.133E-01 |
| ENSG00000101003 | GIN51     | 186.999   | -1.094 | 1.062E-04 | 2.363E-03 | 195.926  | -0.445 | 9.680E-02 | 3.462E-01 |
| ENSG00000085733 | CTTN      | 913.240   | -0.825 | 1.079E-04 | 2.395E-03 | 1003.104 | -0.110 | 5.451E-01 | 7.902E-01 |
| ENSG00000171105 | INSR      | 449.944   | -0.962 | 1.143E-04 | 2.498E-03 | 507.265  | -0.297 | 1.461E-01 | 4.322E-01 |
| ENSG00000068366 | ACSL4     | 1487.430  | -1.214 | 1.197E-04 | 2.587E-03 | 944.067  | -0.316 | 1.474E-01 | 4.340E-01 |
| ENSG00000172943 | PHF8      | 142.384   | -1.277 | 1.207E-04 | 2.600E-03 | 161.635  | -0.460 | 8.808E-02 | 3.291E-01 |
| ENSG00000085871 | MGST2     | 1454.044  | -0.813 | 1.325E-04 | 2.796E-03 | 1151.202 | -0.309 | 1.249E-01 | 3.979E-01 |
| ENSG00000128335 | APOL2     | 151.012   | -1.210 | 1.370E-04 | 2.867E-03 | 76.323   | 0.192  | 5.698E-01 | 8.051E-01 |
| ENSG00000159217 | IGF2BP1   | 1043.109  | -0.809 | 1.372E-04 | 2.867E-03 | 1015.946 | -0.361 | 4.360E-02 | 2.269E-01 |
| ENSG00000105514 | RAB3D     | 124.301   | -1.168 | 1.443E-04 | 2.973E-03 | 100.800  | 0.155  | 6.070E-01 | 8.269E-01 |
| ENSG00000124422 | USP22     | 1406.505  | -0.729 | 1.490E-04 | 3.047E-03 | 1302.343 | -0.372 | 4.872E-02 | 2.400E-01 |
| ENSG00000151413 | NUBPL     | 304.823   | -0.918 | 1.564E-04 | 3.186E-03 | 352.177  | -0.293 | 1.766E-01 | 4.726E-01 |
| ENSG00000132801 | ZSWIM3    | 35.941    | -1.835 | 1.755E-04 | 3.512E-03 | 19.450   | -0.377 | 3.682E-01 | NA        |
| ENSG00000276043 | UHRF1     | 48.896    | -1.554 | 1.784E-04 | 3.548E-03 | 71.061   | -0.147 | 6.591E-01 | 8.531E-01 |
| ENSG00000164096 | C4orf3    | 437.068   | -1.147 | 1.839E-04 | 3.621E-03 | 400.691  | -0.349 | 1.047E-01 | 3.618E-01 |
| ENSG00000156968 | MPV17L    | 339.074   | -1.055 | 1.915E-04 | 3.722E-03 | 288.845  | -0.448 | 6.298E-02 | 2.751E-01 |
| ENSG00000182810 | DDX28     | 131.606   | -1.280 | 1.948E-04 | 3.769E-03 | 112.201  | -0.426 | 2.044E-01 | 5.062E-01 |
| ENSG00000186318 | BACE1     | 58.690    | -1.571 | 2.148E-04 | 4.073E-03 | 54.825   | -0.384 | 3.049E-01 | 6.153E-01 |
| ENSG00000165507 | DEPP1     | 135.434   | -1.231 | 2.227E-04 | 4.169E-03 | 55.680   | 0.419  | 2.604E-01 | 5.702E-01 |
| ENSG00000136295 | TTYH3     | 713.661   | -0.981 | 2.265E-04 | 4.215E-03 | 596.004  | -0.061 | 7.910E-01 | 9.163E-01 |
| ENSG00000164171 | ITGA2     | 202.138   | -1.069 | 2.282E-04 | 4.228E-03 | 155.199  | -0.369 | 1.832E-01 | 4.824E-01 |
| ENSG00000140093 | SERPINA10 | 52.944    | -1.509 | 2.511E-04 | 4.568E-03 | 41.841   | -0.379 | 3.668E-01 | 6.712E-01 |
| ENSG00000146376 | ARHGAP18  | 1600.280  | -0.802 | 2.557E-04 | 4.621E-03 | 1316.002 | -0.218 | 3.157E-01 | 6.262E-01 |
| ENSG00000133195 | SLC39A11  | 157.871   | -1.093 | 2.610E-04 | 4.686E-03 | 135.387  | -0.156 | 6.107E-01 | 8.288E-01 |
| ENSG00000081051 | AFP       | 12826.571 | -0.980 | 2.700E-04 | 4.834E-03 | 9911.816 | -0.354 | 6.294E-02 | 2.751E-01 |
| ENSG00000108375 | RNF43     | 330.872   | -0.874 | 2.772E-04 | 4.922E-03 | 430.778  | -0.426 | 4.798E-02 | 2.381E-01 |

|                 |          |          |        |           |           |          |        |           |           |
|-----------------|----------|----------|--------|-----------|-----------|----------|--------|-----------|-----------|
| ENSG00000110721 | CHKA     | 2381.314 | -0.973 | 2.845E-04 | 5.036E-03 | 1774.524 | -0.205 | 2.909E-01 | 6.011E-01 |
| ENSG00000104635 | SLC39A14 | 1455.777 | -1.071 | 3.282E-04 | 5.716E-03 | 706.133  | -0.051 | 8.378E-01 | 9.363E-01 |
| ENSG00000048828 | FAM120A  | 1433.175 | -0.681 | 3.302E-04 | 5.740E-03 | 1482.803 | -0.055 | 7.387E-01 | 8.915E-01 |
| ENSG00000086061 | DNAJA1   | 1299.883 | -0.747 | 3.346E-04 | 5.763E-03 | 1022.342 | -0.340 | 1.003E-01 | 3.542E-01 |
| ENSG00000059573 | ALDH18A1 | 472.319  | -1.135 | 3.354E-04 | 5.764E-03 | 430.057  | -0.040 | 8.743E-01 | 9.523E-01 |
| ENSG00000016864 | GLT8D1   | 143.957  | -1.334 | 3.444E-04 | 5.894E-03 | 224.494  | -0.500 | 4.701E-02 | 2.361E-01 |
| ENSG00000117601 | SERPINC1 | 298.733  | -0.884 | 3.553E-04 | 6.026E-03 | 307.813  | -0.201 | 4.420E-01 | 7.229E-01 |
| ENSG00000116133 | DHCR24   | 7575.841 | -0.821 | 3.639E-04 | 6.147E-03 | 7509.070 | -0.475 | 1.648E-03 | 3.030E-02 |
| ENSG00000119421 | NDUFA8   | 461.955  | -0.838 | 3.665E-04 | 6.172E-03 | 547.698  | -0.263 | 1.733E-01 | 4.693E-01 |
| ENSG00000044446 | PHKA2    | 186.943  | -1.136 | 3.751E-04 | 6.261E-03 | 220.464  | -0.292 | 2.773E-01 | 5.880E-01 |
| ENSG00000165801 | ARHGEF40 | 95.002   | -1.347 | 3.795E-04 | 6.309E-03 | 82.607   | -0.438 | 2.417E-01 | 5.495E-01 |
| ENSG00000160785 | SLC25A44 | 191.972  | -1.012 | 3.992E-04 | 6.568E-03 | 182.429  | -0.378 | 1.582E-01 | 4.484E-01 |
| ENSG00000125398 | SOX9     | 982.256  | -0.920 | 4.266E-04 | 6.974E-03 | 1021.969 | -0.387 | 5.968E-02 | 2.691E-01 |
| ENSG00000132688 | NES      | 74.621   | -1.277 | 4.459E-04 | 7.235E-03 | 117.226  | -0.223 | 5.045E-01 | 7.642E-01 |
| ENSG00000063854 | HAGH     | 511.174  | -0.814 | 4.656E-04 | 7.477E-03 | 516.638  | -0.083 | 7.140E-01 | 8.812E-01 |
| ENSG00000182872 | RBM10    | 340.534  | -0.991 | 4.888E-04 | 7.763E-03 | 413.851  | -0.384 | 1.089E-01 | 3.691E-01 |
| ENSG00000174804 | FZD4     | 602.425  | -0.892 | 5.056E-04 | 7.980E-03 | 458.381  | -0.478 | 3.178E-02 | 1.905E-01 |
| ENSG00000120948 | TARDBP   | 460.305  | -0.867 | 5.165E-04 | 8.125E-03 | 363.549  | -0.030 | 9.071E-01 | 9.656E-01 |
| ENSG00000138867 | GUCD1    | 729.808  | -0.738 | 5.424E-04 | 8.508E-03 | 792.407  | -0.294 | 1.052E-01 | 3.628E-01 |
| ENSG00000143363 | PRUNE1   | 186.954  | -1.161 | 5.437E-04 | 8.518E-03 | 186.207  | -0.290 | 2.904E-01 | 6.007E-01 |
| ENSG00000234127 | TRIM26   | 192.312  | -1.106 | 5.635E-04 | 8.751E-03 | 221.596  | -0.317 | 1.737E-01 | 4.695E-01 |
| ENSG00000113719 | ERGIC1   | 810.263  | -0.824 | 6.068E-04 | 9.279E-03 | 693.494  | -0.136 | 5.141E-01 | 7.700E-01 |
| ENSG00000112118 | MCM3     | 1703.793 | -0.707 | 6.222E-04 | 9.480E-03 | 1300.069 | -0.178 | 4.431E-01 | 7.233E-01 |
| ENSG00000092964 | DPYSL2   | 380.736  | -0.826 | 6.505E-04 | 9.807E-03 | 509.444  | -0.362 | 6.753E-02 | 2.851E-01 |
| ENSG00000124523 | SIRT5    | 221.325  | -1.039 | 6.835E-04 | 1.027E-02 | 151.915  | -0.284 | 3.486E-01 | 6.546E-01 |
| ENSG00000128294 | TPST2    | 57.960   | -1.417 | 6.915E-04 | 1.036E-02 | 35.343   | -0.477 | 2.327E-01 | 5.380E-01 |

|                 |         |          |        |           |           |          |        |           |           |
|-----------------|---------|----------|--------|-----------|-----------|----------|--------|-----------|-----------|
| ENSG00000257017 | HP      | 132.789  | -1.287 | 6.944E-04 | 1.039E-02 | 94.509   | -0.209 | 5.133E-01 | 7.696E-01 |
| ENSG00000148606 | POLR3A  | 301.560  | -0.923 | 7.232E-04 | 1.068E-02 | 329.858  | -0.481 | 5.283E-02 | 2.511E-01 |
| ENSG00000168246 | UBTD2   | 165.904  | -1.296 | 7.672E-04 | 1.121E-02 | 133.010  | -0.205 | 5.080E-01 | 7.665E-01 |
| ENSG00000120437 | ACAT2   | 1857.549 | -0.672 | 8.056E-04 | 1.167E-02 | 1424.468 | -0.453 | 7.044E-03 | 7.805E-02 |
| ENSG00000105810 | CDK6    | 1680.149 | -0.744 | 8.399E-04 | 1.205E-02 | 1212.769 | -0.272 | 1.632E-01 | 4.540E-01 |
| ENSG00000155850 | SLC26A2 | 86.277   | -1.177 | 8.961E-04 | 1.263E-02 | 125.792  | -0.358 | 2.038E-01 | 5.056E-01 |
| ENSG00000087338 | GMCL1   | 315.973  | -0.891 | 9.444E-04 | 1.321E-02 | 297.536  | -0.448 | 5.335E-02 | 2.524E-01 |
| ENSG00000115275 | MOGS    | 313.363  | -0.810 | 9.887E-04 | 1.377E-02 | 347.258  | -0.429 | 6.860E-02 | 2.870E-01 |
| ENSG00000175745 | NR2F1   | 440.649  | -0.823 | 9.952E-04 | 1.381E-02 | 490.637  | -0.330 | 9.344E-02 | 3.392E-01 |
| ENSG00000113161 | HMGCR   | 504.738  | -0.960 | 1.005E-03 | 1.391E-02 | 480.221  | -0.459 | 2.322E-02 | 1.607E-01 |
| ENSG00000069535 | MAOB    | 205.612  | -1.041 | 1.007E-03 | 1.393E-02 | 195.061  | -0.417 | 1.209E-01 | 3.906E-01 |
| ENSG00000176783 | RUFY1   | 215.521  | -0.874 | 1.010E-03 | 1.395E-02 | 251.135  | -0.225 | 3.697E-01 | 6.734E-01 |
| ENSG00000124253 | PCK1    | 41.282   | -1.439 | 1.028E-03 | 1.411E-02 | 13.883   | -0.384 | 3.596E-01 | NA        |
| ENSG00000033100 | CHPF2   | 54.968   | -1.319 | 1.098E-03 | 1.483E-02 | 66.071   | -0.221 | 5.276E-01 | 7.813E-01 |
| ENSG00000176208 | ATAD5   | 148.933  | -1.021 | 1.096E-03 | 1.483E-02 | 133.377  | -0.434 | 1.669E-01 | 4.598E-01 |
| ENSG00000068724 | TTC7A   | 195.270  | -0.960 | 1.104E-03 | 1.488E-02 | 229.905  | -0.290 | 2.289E-01 | 5.343E-01 |
| ENSG00000103932 | RPAP1   | 149.367  | -0.932 | 1.111E-03 | 1.494E-02 | 268.124  | -0.195 | 4.381E-01 | 7.213E-01 |
| ENSG00000103187 | COTL1   | 222.833  | -0.894 | 1.220E-03 | 1.604E-02 | 190.008  | 0.229  | 4.322E-01 | 7.182E-01 |
| ENSG00000167700 | MFSD3   | 230.016  | -0.944 | 1.239E-03 | 1.620E-02 | 262.235  | -0.360 | 1.961E-01 | 4.975E-01 |
| ENSG00000164252 | AGGF1   | 185.319  | -0.889 | 1.241E-03 | 1.620E-02 | 222.074  | -0.399 | 1.181E-01 | 3.856E-01 |
| ENSG00000180767 | CHST13  | 845.110  | -0.819 | 1.257E-03 | 1.638E-02 | 692.704  | -0.271 | 4.872E-01 | 7.532E-01 |
| ENSG00000149636 | DSN1    | 740.931  | -0.676 | 1.282E-03 | 1.661E-02 | 486.931  | -0.294 | 2.296E-01 | 5.350E-01 |
| ENSG00000205213 | LGR4    | 383.159  | -0.810 | 1.314E-03 | 1.686E-02 | 242.480  | -0.480 | 4.696E-02 | 2.361E-01 |
| ENSG00000162063 | CCNF    | 296.893  | -0.968 | 1.333E-03 | 1.705E-02 | 215.469  | -0.393 | 1.463E-01 | 4.323E-01 |
| ENSG00000123562 | MORF4L2 | 1178.579 | -0.681 | 1.357E-03 | 1.729E-02 | 1331.210 | -0.216 | 2.128E-01 | 5.165E-01 |
| ENSG00000143952 | VPS54   | 202.942  | -1.114 | 1.365E-03 | 1.735E-02 | 143.049  | -0.335 | 3.431E-01 | 6.496E-01 |

|                 |          |          |        |           |           |          |        |           |           |
|-----------------|----------|----------|--------|-----------|-----------|----------|--------|-----------|-----------|
| ENSG00000115365 | LANCL1   | 300.511  | -0.940 | 1.370E-03 | 1.739E-02 | 296.063  | -0.362 | 1.205E-01 | 3.906E-01 |
| ENSG00000121691 | CAT      | 379.458  | -0.839 | 1.377E-03 | 1.742E-02 | 442.306  | -0.338 | 9.134E-02 | 3.354E-01 |
| ENSG00000056998 | GYG2     | 304.953  | -0.819 | 1.397E-03 | 1.763E-02 | 216.435  | -0.014 | 9.548E-01 | 9.835E-01 |
| ENSG00000138614 | INTS14   | 97.501   | -1.359 | 1.405E-03 | 1.769E-02 | 113.070  | 0.274  | 4.429E-01 | 7.231E-01 |
| ENSG00000184787 | UBE2G2   | 557.586  | -0.694 | 1.413E-03 | 1.775E-02 | 465.551  | -0.321 | 2.270E-01 | 5.320E-01 |
| ENSG00000146535 | GNA12    | 554.813  | -0.671 | 1.423E-03 | 1.783E-02 | 393.510  | -0.072 | 7.261E-01 | 8.861E-01 |
| ENSG00000137563 | GGH      | 338.890  | -0.819 | 1.451E-03 | 1.812E-02 | 232.199  | -0.176 | 6.089E-01 | 8.278E-01 |
| ENSG00000106789 | CORO2A   | 442.259  | -0.797 | 1.473E-03 | 1.835E-02 | 396.089  | -0.391 | 7.206E-02 | 2.943E-01 |
| ENSG00000117335 | CD46     | 264.495  | -0.803 | 1.489E-03 | 1.853E-02 | 260.162  | -0.490 | 3.887E-02 | 2.127E-01 |
| ENSG00000158882 | TOMM40L  | 140.196  | -1.029 | 1.514E-03 | 1.875E-02 | 109.911  | -0.196 | 5.114E-01 | 7.687E-01 |
| ENSG00000139921 | TMX1     | 147.515  | -1.145 | 1.553E-03 | 1.911E-02 | 159.611  | -0.166 | 5.605E-01 | 7.993E-01 |
| ENSG00000134363 | FST      | 608.216  | -0.669 | 1.561E-03 | 1.914E-02 | 329.556  | 0.378  | 1.141E-01 | 3.782E-01 |
| ENSG00000103423 | DNAJA3   | 249.448  | -0.901 | 1.581E-03 | 1.931E-02 | 220.330  | -0.082 | 7.701E-01 | 9.054E-01 |
| ENSG00000205730 | ITPRIPL2 | 265.256  | -0.856 | 1.582E-03 | 1.931E-02 | 235.247  | -0.428 | 8.122E-02 | 3.152E-01 |
| ENSG00000169047 | IRS1     | 178.959  | -0.874 | 1.606E-03 | 1.953E-02 | 159.382  | -0.374 | 1.554E-01 | 4.445E-01 |
| ENSG00000276293 | PIP4K2B  | 376.286  | -0.970 | 1.657E-03 | 2.005E-02 | 172.970  | -0.488 | 1.616E-01 | 4.519E-01 |
| ENSG00000142949 | PTPRF    | 1258.798 | -0.673 | 1.657E-03 | 2.005E-02 | 1227.051 | -0.342 | 1.081E-01 | 3.672E-01 |
| ENSG00000136720 | HS6ST1   | 146.115  | -1.185 | 1.662E-03 | 2.010E-02 | 79.129   | -0.383 | 2.499E-01 | 5.593E-01 |
| ENSG00000166833 | NAV2     | 604.011  | -0.680 | 1.676E-03 | 2.020E-02 | 643.159  | -0.167 | 4.278E-01 | 7.152E-01 |
| ENSG00000117791 | MARC2    | 43.739   | -1.349 | 1.681E-03 | 2.022E-02 | 47.854   | -0.217 | 5.528E-01 | 7.942E-01 |
| ENSG00000174173 | TRMT10C  | 155.148  | -0.965 | 1.703E-03 | 2.046E-02 | 135.419  | -0.428 | 1.623E-01 | 4.528E-01 |
| ENSG00000198056 | PRIM1    | 107.552  | -1.030 | 1.722E-03 | 2.059E-02 | 123.194  | -0.156 | 5.984E-01 | 8.211E-01 |
| ENSG00000135048 | TMEM2    | 657.712  | -0.885 | 1.822E-03 | 2.155E-02 | 587.014  | -0.126 | 5.664E-01 | 8.023E-01 |
| ENSG00000183340 | JRKL     | 67.819   | -1.274 | 1.849E-03 | 2.178E-02 | 73.031   | -0.145 | 6.888E-01 | 8.672E-01 |
| ENSG00000145692 | BHMT     | 30.574   | -1.607 | 1.861E-03 | 2.184E-02 | 8.402    | -0.632 | 1.079E-01 | NA        |
| ENSG00000115194 | SLC30A3  | 66.931   | -1.284 | 1.868E-03 | 2.188E-02 | 38.667   | -0.345 | 4.112E-01 | 7.051E-01 |

|                 |          |           |        |           |           |           |        |           |           |
|-----------------|----------|-----------|--------|-----------|-----------|-----------|--------|-----------|-----------|
| ENSG00000143971 | ETAA1    | 37.069    | -1.532 | 1.910E-03 | 2.222E-02 | 34.612    | -0.149 | 7.203E-01 | 8.834E-01 |
| ENSG00000168306 | ACOX2    | 93.171    | -1.133 | 1.967E-03 | 2.271E-02 | 59.695    | -0.356 | 3.227E-01 | 6.306E-01 |
| ENSG00000175970 | UNC119B  | 110.265   | -1.004 | 2.048E-03 | 2.350E-02 | 138.183   | -0.251 | 3.991E-01 | 6.973E-01 |
| ENSG00000100578 | KIAA0586 | 133.824   | -0.967 | 2.107E-03 | 2.409E-02 | 131.567   | -0.398 | 1.863E-01 | 4.855E-01 |
| ENSG00000278845 | MRPL45   | 770.709   | -0.749 | 2.113E-03 | 2.413E-02 | 545.748   | -0.051 | 8.301E-01 | 9.329E-01 |
| ENSG00000066813 | ACSM2B   | 55.489    | -1.303 | 2.117E-03 | 2.415E-02 | 57.984    | -0.378 | 3.169E-01 | 6.270E-01 |
| ENSG00000108821 | COL1A1   | 37.691    | -1.546 | 2.147E-03 | 2.441E-02 | 9.833     | -0.564 | 1.213E-01 | NA        |
| ENSG00000099783 | HNRNPM   | 2384.234  | -0.574 | 2.158E-03 | 2.451E-02 | 2001.072  | -0.113 | 4.867E-01 | 7.531E-01 |
| ENSG00000152291 | TGOLN2   | 1838.700  | -0.591 | 2.184E-03 | 2.476E-02 | 2132.841  | -0.118 | 5.228E-01 | 7.775E-01 |
| ENSG00000119487 | MAPKAP1  | 353.408   | -0.754 | 2.193E-03 | 2.484E-02 | 399.037   | -0.359 | 1.021E-01 | 3.580E-01 |
| ENSG00000102054 | RBBP7    | 606.415   | -0.708 | 2.220E-03 | 2.507E-02 | 519.275   | -0.336 | 1.206E-01 | 3.906E-01 |
| ENSG00000135821 | GLUL     | 715.920   | -0.657 | 2.233E-03 | 2.516E-02 | 628.537   | -0.271 | 1.614E-01 | 4.518E-01 |
| ENSG00000077549 | CAPZB    | 2933.026  | -0.705 | 2.235E-03 | 2.517E-02 | 2947.463  | -0.042 | 8.163E-01 | 9.264E-01 |
| ENSG00000143740 | SNAP47   | 108.642   | -1.002 | 2.333E-03 | 2.604E-02 | 118.420   | -0.386 | 2.013E-01 | 5.035E-01 |
| ENSG00000091262 | ABCC6    | 108.170   | -0.988 | 2.364E-03 | 2.629E-02 | 146.517   | -0.431 | 1.213E-01 | 3.907E-01 |
| ENSG00000179387 | ELMOD2   | 82.618    | -1.197 | 2.387E-03 | 2.638E-02 | 72.395    | -0.130 | 7.031E-01 | 8.745E-01 |
| ENSG00000137869 | CYP19A1  | 34.642    | -1.510 | 2.652E-03 | 2.865E-02 | 36.616    | 0.190  | 6.354E-01 | 8.417E-01 |
| ENSG00000198780 | FAM169A  | 222.912   | -0.895 | 2.668E-03 | 2.874E-02 | 270.256   | -0.359 | 1.368E-01 | 4.180E-01 |
| ENSG00000150977 | RILPL2   | 230.977   | -0.787 | 2.718E-03 | 2.921E-02 | 149.645   | -0.472 | 1.592E-01 | 4.501E-01 |
| ENSG00000160255 | ITGB2    | 140.250   | -1.083 | 2.728E-03 | 2.927E-02 | 133.688   | -0.025 | 9.347E-01 | 9.761E-01 |
| ENSG00000162600 | OMA1     | 37.398    | -1.314 | 2.863E-03 | 3.049E-02 | 37.718    | 0.069  | 8.596E-01 | 9.473E-01 |
| ENSG00000111276 | CDKN1B   | 211.875   | -0.813 | 2.865E-03 | 3.049E-02 | 226.486   | 0.205  | 4.335E-01 | 7.186E-01 |
| ENSG00000213699 | SLC35F6  | 93.080    | -1.096 | 2.876E-03 | 3.057E-02 | 291.411   | -0.135 | 5.772E-01 | 8.086E-01 |
| ENSG00000277161 | PIGW     | 173.296   | -0.819 | 2.923E-03 | 3.097E-02 | 137.725   | 0.200  | 5.093E-01 | 7.672E-01 |
| ENSG00000168243 | GNG4     | 298.876   | -0.774 | 3.048E-03 | 3.201E-02 | 304.308   | -0.373 | 1.739E-01 | 4.695E-01 |
| ENSG00000163631 | ALB      | 26266.375 | -0.591 | 3.087E-03 | 3.231E-02 | 20157.922 | -0.269 | 8.653E-02 | 3.254E-01 |

|                 |         |           |        |           |           |           |        |           |           |
|-----------------|---------|-----------|--------|-----------|-----------|-----------|--------|-----------|-----------|
| ENSG00000077097 | TOP2B   | 472.690   | -0.665 | 3.093E-03 | 3.234E-02 | 601.408   | -0.300 | 1.038E-01 | 3.606E-01 |
| ENSG00000165478 | HEPACAM | 34.815    | -1.527 | 3.103E-03 | 3.239E-02 | 28.123    | -0.617 | 1.352E-01 | 4.154E-01 |
| ENSG00000173209 | AHSA2P  | 196.623   | -0.897 | 3.120E-03 | 3.255E-02 | 268.861   | -0.309 | 2.132E-01 | 5.169E-01 |
| ENSG00000123416 | TUBA1B  | 11527.708 | -0.608 | 3.157E-03 | 3.282E-02 | 9044.953  | -0.255 | 2.225E-01 | 5.276E-01 |
| ENSG00000132716 | DCAF8   | 220.820   | -0.807 | 3.204E-03 | 3.315E-02 | 212.948   | -0.100 | 7.178E-01 | 8.828E-01 |
| ENSG00000119227 | PIGZ    | 39.567    | -1.371 | 3.246E-03 | 3.345E-02 | 51.041    | -0.301 | 4.426E-01 | 7.229E-01 |
| ENSG00000198890 | PRMT6   | 44.480    | -1.459 | 3.254E-03 | 3.351E-02 | 43.781    | -0.226 | 5.486E-01 | 7.916E-01 |
| ENSG00000100867 | DHRS2   | 45505.309 | -0.579 | 3.268E-03 | 3.363E-02 | 44754.935 | 0.017  | 9.144E-01 | 9.684E-01 |
| ENSG00000129317 | PUS7L   | 171.997   | -0.987 | 3.271E-03 | 3.363E-02 | 156.348   | -0.106 | 6.986E-01 | 8.720E-01 |
| ENSG00000099810 | MTAP    | 228.218   | -0.810 | 3.279E-03 | 3.363E-02 | 221.029   | -0.397 | 1.315E-01 | 4.098E-01 |
| ENSG00000126878 | AIF1L   | 313.815   | -0.818 | 3.348E-03 | 3.409E-02 | 214.414   | -0.097 | 7.445E-01 | 8.937E-01 |
| ENSG00000197894 | ADH5    | 1682.529  | -0.675 | 3.366E-03 | 3.425E-02 | 1434.958  | 0.026  | 8.995E-01 | 9.629E-01 |
| ENSG00000166135 | HIF1AN  | 300.409   | -0.785 | 3.422E-03 | 3.462E-02 | 176.218   | -0.405 | 1.924E-01 | 4.932E-01 |
| ENSG00000089685 | BIRC5   | 1325.116  | -0.647 | 3.485E-03 | 3.506E-02 | 1279.879  | -0.377 | 5.382E-02 | 2.536E-01 |
| ENSG00000168496 | FEN1    | 944.339   | -0.782 | 3.500E-03 | 3.519E-02 | 574.307   | 0.186  | 4.646E-01 | 7.413E-01 |
| ENSG00000159055 | MIS18A  | 434.301   | -0.676 | 3.547E-03 | 3.555E-02 | 293.110   | -0.034 | 8.829E-01 | 9.550E-01 |
| ENSG00000103042 | SLC38A7 | 132.391   | -0.902 | 3.558E-03 | 3.560E-02 | 138.974   | -0.428 | 1.179E-01 | 3.856E-01 |
| ENSG00000152270 | PDE3B   | 123.899   | -0.880 | 3.642E-03 | 3.628E-02 | 108.939   | -0.215 | 4.565E-01 | 7.356E-01 |
| ENSG00000119772 | DNMT3A  | 427.444   | -0.667 | 3.667E-03 | 3.646E-02 | 369.590   | -0.418 | 5.056E-02 | 2.448E-01 |
| ENSG00000170439 | METTL7B | 44.619    | -1.302 | 3.685E-03 | 3.656E-02 | 66.735    | -0.457 | 2.245E-01 | 5.291E-01 |
| ENSG00000158555 | GDPD5   | 167.895   | -0.889 | 3.780E-03 | 3.712E-02 | 117.892   | -0.355 | 2.304E-01 | 5.360E-01 |
| ENSG00000009950 | MLXIPL  | 1687.492  | -0.672 | 3.775E-03 | 3.712E-02 | 1213.564  | -0.069 | 8.518E-01 | 9.441E-01 |
| ENSG00000041357 | PSMA4   | 675.516   | -0.614 | 3.770E-03 | 3.712E-02 | 918.604   | 0.123  | 5.135E-01 | 7.696E-01 |
| ENSG00000132182 | NUP210  | 293.639   | -0.709 | 3.837E-03 | 3.751E-02 | 274.816   | -0.362 | 1.131E-01 | 3.763E-01 |
| ENSG00000057019 | DCBLD2  | 538.137   | -0.630 | 3.848E-03 | 3.759E-02 | 621.260   | -0.224 | 2.854E-01 | 5.965E-01 |
| ENSG00000257365 | FNTB    | 207.452   | -0.800 | 3.855E-03 | 3.762E-02 | 207.504   | -0.298 | 2.846E-01 | 5.960E-01 |

|                 |          |         |        |           |           |         |        |           |           |
|-----------------|----------|---------|--------|-----------|-----------|---------|--------|-----------|-----------|
| ENSG00000167034 | NKX3-1   | 48.884  | -1.330 | 3.905E-03 | 3.792E-02 | 72.147  | -0.488 | 1.494E-01 | 4.367E-01 |
| ENSG00000189339 | SLC35E2B | 212.597 | -0.823 | 3.916E-03 | 3.799E-02 | 289.529 | -0.498 | 4.129E-02 | 2.199E-01 |
| ENSG00000130193 | THEM6    | 470.356 | -0.859 | 3.994E-03 | 3.857E-02 | 461.962 | -0.475 | 2.935E-02 | 1.819E-01 |
| ENSG00000167114 | SLC27A4  | 73.627  | -1.247 | 4.001E-03 | 3.861E-02 | 67.164  | -0.168 | 6.356E-01 | 8.417E-01 |
| ENSG00000125843 | AP5S1    | 192.647 | -0.887 | 4.047E-03 | 3.894E-02 | 195.925 | -0.370 | 1.446E-01 | 4.299E-01 |
| ENSG00000115207 | GTF3C2   | 258.141 | -0.952 | 4.096E-03 | 3.934E-02 | 253.575 | -0.404 | 8.887E-02 | 3.304E-01 |
| ENSG00000183044 | ABAT     | 246.860 | -0.819 | 4.179E-03 | 3.985E-02 | 248.953 | -0.430 | 9.612E-02 | 3.447E-01 |
| ENSG00000171320 | ESCO2    | 85.761  | -1.116 | 4.217E-03 | 4.018E-02 | 85.517  | -0.409 | 2.610E-01 | 5.708E-01 |
| ENSG00000198130 | HIBCH    | 285.490 | -0.830 | 4.308E-03 | 4.093E-02 | 252.121 | -0.236 | 3.607E-01 | 6.659E-01 |
| ENSG00000108395 | TRIM37   | 217.420 | -0.761 | 4.345E-03 | 4.119E-02 | 248.587 | 0.055  | 8.113E-01 | 9.241E-01 |
| ENSG00000170522 | ELOVL6   | 87.804  | -1.026 | 4.388E-03 | 4.147E-02 | 111.235 | -0.398 | 1.788E-01 | 4.755E-01 |
| ENSG00000103174 | NAGPA    | 332.198 | -0.699 | 4.464E-03 | 4.203E-02 | 326.161 | -0.193 | 4.729E-01 | 7.468E-01 |
| ENSG00000198873 | GRK5     | 83.623  | -1.018 | 4.470E-03 | 4.206E-02 | 84.838  | -0.218 | 5.197E-01 | 7.753E-01 |
| ENSG00000154920 | EME1     | 87.122  | -1.017 | 4.479E-03 | 4.212E-02 | 72.219  | -0.471 | 1.890E-01 | 4.880E-01 |
| ENSG00000132842 | AP3B1    | 265.319 | -0.837 | 4.528E-03 | 4.248E-02 | 292.108 | -0.306 | 1.736E-01 | 4.693E-01 |
| ENSG00000168310 | IRF2     | 100.663 | -1.036 | 4.557E-03 | 4.265E-02 | 171.143 | -0.343 | 1.937E-01 | 4.947E-01 |
| ENSG00000128512 | DOCK4    | 107.984 | -0.929 | 4.614E-03 | 4.291E-02 | 87.327  | -0.245 | 4.417E-01 | 7.227E-01 |
| ENSG00000011021 | CLCN6    | 50.127  | -1.273 | 4.643E-03 | 4.315E-02 | 61.742  | -0.226 | 5.191E-01 | 7.744E-01 |
| ENSG00000139318 | DUSP6    | 325.839 | -0.797 | 4.696E-03 | 4.348E-02 | 219.691 | 0.365  | 1.955E-01 | 4.967E-01 |
| ENSG00000173894 | CBX2     | 102.620 | -0.936 | 4.743E-03 | 4.388E-02 | 71.295  | -0.386 | 2.764E-01 | 5.867E-01 |
| ENSG00000085185 | BCORL1   | 93.686  | -0.972 | 4.770E-03 | 4.394E-02 | 87.024  | -0.370 | 2.287E-01 | 5.340E-01 |
| ENSG00000157870 | FAM213B  | 249.795 | -0.817 | 4.809E-03 | 4.411E-02 | 212.148 | 0.166  | 5.174E-01 | 7.727E-01 |
| ENSG00000213462 | ERV3-1   | 113.456 | -0.995 | 4.913E-03 | 4.491E-02 | 148.855 | -0.302 | 2.788E-01 | 5.894E-01 |
| ENSG00000167074 | TEF      | 32.400  | -1.300 | 4.939E-03 | 4.498E-02 | 17.487  | -0.635 | 1.300E-01 | NA        |
| ENSG00000130349 | C6orf203 | 38.430  | -1.220 | 4.931E-03 | 4.498E-02 | 44.491  | -0.412 | 3.053E-01 | 6.154E-01 |
| ENSG00000107890 | ANKRD26  | 253.397 | -0.920 | 4.929E-03 | 4.498E-02 | 306.569 | -0.300 | 2.286E-01 | 5.340E-01 |

|                 |              |          |        |           |           |          |        |           |           |
|-----------------|--------------|----------|--------|-----------|-----------|----------|--------|-----------|-----------|
| ENSG00000167699 | GLOD4        | 348.326  | -0.762 | 4.935E-03 | 4.498E-02 | 291.546  | -0.173 | 4.902E-01 | 7.551E-01 |
| ENSG00000102910 | LONP2        | 333.159  | -0.688 | 4.939E-03 | 4.498E-02 | 337.674  | -0.500 | 2.103E-02 | 1.523E-01 |
| ENSG00000111269 | CREBL2       | 154.811  | -0.849 | 5.092E-03 | 4.617E-02 | 114.710  | -0.125 | 6.813E-01 | 8.631E-01 |
| ENSG00000257742 | RP11-350F4.2 | 96.480   | -0.946 | 5.124E-03 | 4.634E-02 | 96.059   | -0.131 | 6.898E-01 | 8.680E-01 |
| ENSG00000166347 | CYB5A        | 1603.630 | -0.687 | 5.146E-03 | 4.644E-02 | 1473.994 | -0.138 | 4.254E-01 | 7.136E-01 |
| ENSG00000058668 | ATP2B4       | 33.969   | -1.298 | 5.154E-03 | 4.644E-02 | 19.193   | -0.101 | 8.101E-01 | NA        |
| ENSG00000183765 | CHEK2        | 160.390  | -0.938 | 5.242E-03 | 4.704E-02 | 131.474  | -0.083 | 7.997E-01 | 9.193E-01 |
| ENSG00000136240 | KDEL2        | 1013.080 | -0.681 | 5.274E-03 | 4.729E-02 | 978.204  | -0.205 | 2.949E-01 | 6.049E-01 |
| ENSG00000137274 | BPHL         | 72.604   | -1.118 | 5.342E-03 | 4.783E-02 | 84.778   | -0.379 | 2.867E-01 | 5.977E-01 |
| ENSG00000128944 | KNSTRN       | 229.994  | -0.837 | 5.353E-03 | 4.790E-02 | 173.662  | -0.199 | 4.997E-01 | 7.605E-01 |
| ENSG00000248092 | NNT-AS1      | 144.746  | -0.821 | 5.382E-03 | 4.803E-02 | 195.855  | -0.167 | 5.365E-01 | 7.866E-01 |
| ENSG00000123684 | LPGAT1       | 231.219  | -0.746 | 5.432E-03 | 4.830E-02 | 292.725  | -0.034 | 8.830E-01 | 9.550E-01 |
| ENSG00000115282 | TTC31        | 124.409  | -0.956 | 5.483E-03 | 4.862E-02 | 179.584  | -0.432 | 1.497E-01 | 4.372E-01 |
| ENSG00000197892 | KIF13B       | 128.447  | -0.923 | 5.509E-03 | 4.871E-02 | 122.158  | -0.180 | 5.543E-01 | 7.947E-01 |
| ENSG00000124299 | PEPD         | 270.277  | -0.844 | 5.740E-03 | 5.040E-02 | 250.817  | 0.021  | 9.248E-01 | 9.727E-01 |
| ENSG00000100116 | GCAT         | 117.717  | -0.907 | 5.802E-03 | 5.070E-02 | 105.197  | -0.160 | 5.947E-01 | 8.187E-01 |
| ENSG00000183077 | AFMID        | 879.684  | -0.592 | 5.959E-03 | 5.172E-02 | 569.708  | -0.161 | 4.867E-01 | 7.531E-01 |
| ENSG00000130544 | ZNF557       | 66.210   | -1.068 | 6.109E-03 | 5.281E-02 | 56.179   | -0.360 | 3.219E-01 | 6.298E-01 |
| ENSG00000117899 | MESD         | 1624.156 | -0.629 | 6.117E-03 | 5.284E-02 | 942.079  | -0.358 | 1.472E-01 | 4.339E-01 |
| ENSG00000158315 | RHBDL2       | 33.030   | -1.387 | 6.145E-03 | 5.302E-02 | 18.562   | -0.020 | 9.627E-01 | NA        |
| ENSG00000169951 | ZNF764       | 66.016   | -1.126 | 6.258E-03 | 5.384E-02 | 62.052   | 0.071  | 8.458E-01 | 9.409E-01 |
| ENSG00000118707 | TGIF2        | 370.368  | -0.812 | 6.315E-03 | 5.415E-02 | 346.859  | -0.054 | 7.944E-01 | 9.179E-01 |
| ENSG00000176623 | RMDN1        | 179.229  | -0.882 | 6.378E-03 | 5.452E-02 | 242.350  | -0.401 | 1.435E-01 | 4.289E-01 |
| ENSG00000102178 | UBL4A        | 177.814  | -0.825 | 6.447E-03 | 5.481E-02 | 161.102  | 0.213  | 4.216E-01 | 7.118E-01 |
| ENSG00000151718 | WWC2         | 397.907  | -0.710 | 6.441E-03 | 5.481E-02 | 502.745  | -0.496 | 1.851E-02 | 1.415E-01 |
| ENSG00000133026 | MYH10        | 1159.877 | -0.679 | 6.461E-03 | 5.481E-02 | 969.568  | -0.407 | 2.687E-02 | 1.727E-01 |



|                 |            |          |        |           |           |          |        |           |           |
|-----------------|------------|----------|--------|-----------|-----------|----------|--------|-----------|-----------|
| ENSG00000125686 | MED1       | 1088.139 | -0.558 | 6.555E-03 | 5.517E-02 | 1100.486 | -0.134 | 4.210E-01 | 7.116E-01 |
| ENSG00000231074 | HCG18      | 146.883  | -0.842 | 6.583E-03 | 5.534E-02 | 186.309  | -0.348 | 1.747E-01 | 4.700E-01 |
| ENSG00000174990 | CA5A       | 80.889   | -1.092 | 6.668E-03 | 5.590E-02 | 80.234   | -0.310 | 3.950E-01 | 6.935E-01 |
| ENSG00000131732 | ZCCHC9     | 315.672  | -0.674 | 6.714E-03 | 5.617E-02 | 310.281  | -0.365 | 1.178E-01 | 3.855E-01 |
| ENSG00000122787 | AKR1D1     | 45.179   | -1.202 | 6.720E-03 | 5.619E-02 | 58.647   | -0.343 | 3.476E-01 | 6.536E-01 |
| ENSG00000138073 | PREB       | 842.639  | -0.788 | 6.725E-03 | 5.619E-02 | 503.086  | -0.004 | 9.881E-01 | 9.957E-01 |
| ENSG00000135341 | MAP3K7     | 297.057  | -0.669 | 6.762E-03 | 5.647E-02 | 279.487  | -0.199 | 3.973E-01 | 6.957E-01 |
| ENSG00000012963 | UBR7       | 137.738  | -0.940 | 6.811E-03 | 5.677E-02 | 130.417  | -0.392 | 2.187E-01 | 5.238E-01 |
| ENSG00000130939 | UBE4B      | 219.941  | -0.841 | 6.832E-03 | 5.687E-02 | 261.558  | -0.246 | 2.901E-01 | 6.004E-01 |
| ENSG00000174567 | GOLT1A     | 186.957  | -0.776 | 6.870E-03 | 5.699E-02 | 115.944  | -0.084 | 7.716E-01 | 9.065E-01 |
| ENSG00000079739 | PGM1       | 344.495  | -0.703 | 6.948E-03 | 5.714E-02 | 265.710  | -0.388 | 9.251E-02 | 3.376E-01 |
| ENSG00000171634 | BPTF       | 1908.643 | -0.698 | 6.943E-03 | 5.714E-02 | 2115.585 | -0.441 | 1.687E-02 | 1.332E-01 |
| ENSG00000136156 | ITM2B      | 806.315  | -0.592 | 7.029E-03 | 5.749E-02 | 786.564  | -0.465 | 1.623E-02 | 1.307E-01 |
| ENSG00000087502 | ERGIC2     | 237.723  | -0.767 | 7.101E-03 | 5.793E-02 | 130.457  | -0.282 | 3.867E-01 | 6.860E-01 |
| ENSG00000168936 | TMEM129    | 230.877  | -0.741 | 7.168E-03 | 5.826E-02 | 199.887  | 0.140  | 5.866E-01 | 8.141E-01 |
| ENSG00000126391 | FRMD8      | 1091.343 | -0.605 | 7.233E-03 | 5.867E-02 | 932.678  | -0.362 | 6.005E-02 | 2.697E-01 |
| ENSG00000135148 | TRAFD1     | 76.275   | -0.994 | 7.238E-03 | 5.867E-02 | 69.767   | -0.353 | 3.017E-01 | 6.120E-01 |
| ENSG00000070540 | WIPI1      | 101.817  | -0.874 | 7.253E-03 | 5.876E-02 | 93.384   | -0.496 | 1.230E-01 | 3.936E-01 |
| ENSG00000269976 | AC012065.3 | 120.311  | -0.868 | 7.420E-03 | 5.974E-02 | 114.469  | 0.066  | 8.424E-01 | 9.390E-01 |
| ENSG00000164638 | SLC29A4    | 102.644  | -0.961 | 7.527E-03 | 6.044E-02 | 128.370  | -0.112 | 7.167E-01 | 8.825E-01 |
| ENSG00000115459 | ELMOD3     | 30.989   | -1.221 | 7.684E-03 | 6.147E-02 | 29.219   | -0.363 | 3.763E-01 | 6.776E-01 |
| ENSG00000239887 | C1orf226   | 63.339   | -1.176 | 7.712E-03 | 6.164E-02 | 40.432   | -0.290 | 4.861E-01 | 7.530E-01 |
| ENSG00000177971 | IMP3       | 2169.321 | -0.576 | 7.798E-03 | 6.211E-02 | 1843.622 | -0.470 | 9.916E-03 | 9.753E-02 |
| ENSG00000129195 | PIMREG     | 105.433  | -0.953 | 7.927E-03 | 6.295E-02 | 94.544   | -0.121 | 7.014E-01 | 8.737E-01 |
| ENSG00000143198 | MGST3      | 374.344  | -0.900 | 8.070E-03 | 6.388E-02 | 298.031  | -0.328 | 2.262E-01 | 5.311E-01 |
| ENSG00000116771 | AGMAT      | 1062.812 | -0.652 | 8.175E-03 | 6.447E-02 | 990.651  | -0.439 | 5.180E-02 | 2.484E-01 |

|                 |            |           |        |           |           |          |        |           |           |
|-----------------|------------|-----------|--------|-----------|-----------|----------|--------|-----------|-----------|
| ENSG00000091513 | TF         | 7723.301  | -0.579 | 8.219E-03 | 6.474E-02 | 5606.143 | -0.156 | 6.639E-01 | 8.547E-01 |
| ENSG00000107185 | RGP1       | 226.497   | -0.720 | 8.236E-03 | 6.484E-02 | 215.228  | -0.037 | 8.936E-01 | 9.603E-01 |
| ENSG00000144026 | ZNF514     | 43.274    | -1.184 | 8.280E-03 | 6.510E-02 | 59.684   | -0.465 | 2.398E-01 | 5.470E-01 |
| ENSG00000189266 | PNRC2      | 178.365   | -0.811 | 8.476E-03 | 6.644E-02 | 179.200  | -0.125 | 6.924E-01 | 8.684E-01 |
| ENSG00000183688 | RFLNB      | 244.552   | -0.733 | 8.511E-03 | 6.658E-02 | 168.242  | -0.157 | 5.494E-01 | 7.918E-01 |
| ENSG00000125912 | NCLN       | 457.792   | -0.582 | 8.559E-03 | 6.680E-02 | 226.565  | -0.209 | 4.305E-01 | 7.168E-01 |
| ENSG00000168393 | DTYMK      | 562.129   | -0.590 | 8.621E-03 | 6.720E-02 | 532.477  | -0.266 | 2.356E-01 | 5.420E-01 |
| ENSG00000134243 | SORT1      | 235.308   | -0.708 | 8.633E-03 | 6.725E-02 | 246.954  | 0.186  | 4.270E-01 | 7.147E-01 |
| ENSG00000114988 | LMAN2L     | 206.535   | -0.799 | 8.679E-03 | 6.741E-02 | 169.706  | -0.299 | 3.302E-01 | 6.378E-01 |
| ENSG00000119139 | TJP2       | 640.490   | -0.591 | 8.814E-03 | 6.815E-02 | 743.617  | -0.129 | 4.990E-01 | 7.602E-01 |
| ENSG00000145192 | AHSG       | 10378.432 | -0.541 | 8.847E-03 | 6.825E-02 | 7607.772 | 0.072  | 6.226E-01 | 8.361E-01 |
| ENSG00000253719 | ATXN7L3B   | 356.921   | -0.703 | 8.911E-03 | 6.858E-02 | 344.587  | -0.191 | 4.043E-01 | 7.008E-01 |
| ENSG00000183486 | MX2        | 152.622   | -0.776 | 9.040E-03 | 6.928E-02 | 147.713  | -0.346 | 2.286E-01 | 5.340E-01 |
| ENSG00000198794 | SCAMP5     | 235.729   | -0.692 | 9.059E-03 | 6.938E-02 | 206.227  | -0.441 | 2.099E-01 | 5.130E-01 |
| ENSG00000170456 | DENND5B    | 237.728   | -0.677 | 9.213E-03 | 7.031E-02 | 291.662  | -0.478 | 3.945E-02 | 2.150E-01 |
| ENSG00000107929 | LARP4B     | 183.787   | -0.801 | 9.290E-03 | 7.075E-02 | 238.675  | -0.159 | 5.247E-01 | 7.785E-01 |
| ENSG00000168411 | RFWD3      | 553.307   | -0.583 | 9.353E-03 | 7.108E-02 | 454.756  | -0.155 | 4.806E-01 | 7.508E-01 |
| ENSG00000164818 | DNAAF5     | 271.900   | -0.844 | 9.402E-03 | 7.137E-02 | 295.914  | 0.135  | 5.705E-01 | 8.056E-01 |
| ENSG00000175782 | SLC35E3    | 462.738   | -0.614 | 9.410E-03 | 7.139E-02 | 352.471  | -0.319 | 1.541E-01 | 4.423E-01 |
| ENSG00000118260 | CREB1      | 214.120   | -0.768 | 9.485E-03 | 7.183E-02 | 334.921  | 0.002  | 9.919E-01 | 9.967E-01 |
| ENSG00000188242 | AC010442.1 | 61.227    | -1.076 | 9.524E-03 | 7.200E-02 | 57.222   | -0.396 | 2.819E-01 | 5.925E-01 |
| ENSG00000162433 | AK4        | 1089.883  | -0.630 | 9.552E-03 | 7.209E-02 | 636.641  | -0.497 | 2.273E-02 | 1.588E-01 |
| ENSG00000247556 | OIP5-AS1   | 673.753   | -0.541 | 9.642E-03 | 7.251E-02 | 421.872  | -0.332 | 1.443E-01 | 4.297E-01 |
| ENSG00000175220 | ARHGAP1    | 368.977   | -0.638 | 9.814E-03 | 7.348E-02 | 429.617  | -0.263 | 1.883E-01 | 4.872E-01 |
| ENSG00000023445 | BIRC3      | 27.092    | 1.376  | 9.818E-03 | 7.348E-02 | 59.485   | 1.423  | 3.173E-04 | 1.007E-02 |
| ENSG00000116791 | CRYZ       | 528.404   | -0.721 | 9.828E-03 | 7.351E-02 | 398.166  | 0.382  | 1.332E-01 | 4.121E-01 |

|                 |          |          |        |           |           |          |        |           |           |
|-----------------|----------|----------|--------|-----------|-----------|----------|--------|-----------|-----------|
| ENSG00000177352 | CCDC71   | 57.517   | -1.128 | 9.870E-03 | 7.378E-02 | 53.821   | -0.454 | 2.077E-01 | 5.103E-01 |
| ENSG00000063322 | MED29    | 129.069  | -0.831 | 9.909E-03 | 7.399E-02 | 117.251  | -0.254 | 4.191E-01 | 7.095E-01 |
| ENSG00000163257 | DCAF16   | 356.460  | -0.602 | 1.013E-02 | 7.522E-02 | 406.771  | -0.294 | 1.876E-01 | 4.870E-01 |
| ENSG00000105953 | OGDH     | 89.920   | -0.928 | 1.016E-02 | 7.532E-02 | 91.661   | -0.385 | 2.196E-01 | 5.249E-01 |
| ENSG00000168890 | TMEM150A | 206.701  | -0.760 | 1.035E-02 | 7.633E-02 | 150.590  | -0.100 | 7.589E-01 | 9.012E-01 |
| ENSG00000108946 | PRKAR1A  | 1405.606 | -0.528 | 1.036E-02 | 7.633E-02 | 817.062  | 0.021  | 9.239E-01 | 9.721E-01 |
| ENSG00000168874 | ATOH8    | 26.972   | 1.355  | 1.037E-02 | 7.638E-02 | 36.048   | 0.749  | 7.108E-02 | 2.919E-01 |
| ENSG00000165819 | METTL3   | 139.918  | -0.858 | 1.053E-02 | 7.734E-02 | 159.876  | -0.192 | 4.689E-01 | 7.442E-01 |
| ENSG00000140025 | EFCAB11  | 95.700   | -0.871 | 1.057E-02 | 7.760E-02 | 83.780   | -0.101 | 7.582E-01 | 9.010E-01 |
| ENSG00000142677 | IL22RA1  | 57.525   | -1.196 | 1.075E-02 | 7.863E-02 | 46.632   | 0.144  | 6.881E-01 | 8.670E-01 |
| ENSG00000183718 | TRIM52   | 39.162   | -1.149 | 1.094E-02 | 7.960E-02 | 41.701   | -0.420 | 2.907E-01 | 6.007E-01 |
| ENSG00000162878 | PKDCC    | 388.757  | -1.249 | 1.101E-02 | 7.986E-02 | 168.918  | -0.127 | 7.566E-01 | 9.007E-01 |
| ENSG00000167840 | ZNF232   | 78.190   | -0.927 | 1.108E-02 | 8.019E-02 | 81.233   | -0.360 | 2.742E-01 | 5.842E-01 |
| ENSG00000165675 | ENOX2    | 111.212  | -0.950 | 1.122E-02 | 8.087E-02 | 104.467  | -0.355 | 2.656E-01 | 5.754E-01 |
| ENSG00000102595 | UGGT2    | 92.631   | -0.905 | 1.129E-02 | 8.131E-02 | 105.171  | -0.497 | 1.513E-01 | 4.389E-01 |
| ENSG00000075407 | ZNF37A   | 196.181  | -0.744 | 1.135E-02 | 8.168E-02 | 223.267  | -0.295 | 2.352E-01 | 5.414E-01 |
| ENSG00000111077 | TNS2     | 71.452   | -0.926 | 1.157E-02 | 8.294E-02 | 51.068   | -0.206 | 5.690E-01 | 8.042E-01 |
| ENSG00000197977 | ELOVL2   | 436.723  | -0.582 | 1.164E-02 | 8.342E-02 | 587.071  | -0.341 | 7.694E-02 | 3.050E-01 |
| ENSG00000170542 | SERPINB9 | 46.327   | -1.071 | 1.165E-02 | 8.342E-02 | 26.554   | -0.295 | 4.638E-01 | 7.409E-01 |
| ENSG00000236287 | ZBED5    | 58.791   | -0.955 | 1.186E-02 | 8.437E-02 | 64.041   | -0.466 | 2.551E-01 | 5.656E-01 |
| ENSG00000108100 | CCNY     | 661.980  | -0.623 | 1.186E-02 | 8.437E-02 | 560.064  | 0.154  | 4.751E-01 | 7.480E-01 |
| ENSG00000131462 | TUBG1    | 650.633  | -0.573 | 1.184E-02 | 8.437E-02 | 742.203  | -0.020 | 9.116E-01 | 9.679E-01 |
| ENSG00000118762 | PKD2     | 58.276   | -1.041 | 1.187E-02 | 8.442E-02 | 55.149   | -0.406 | 2.629E-01 | 5.730E-01 |
| ENSG00000130347 | RTN4IP1  | 58.759   | -1.034 | 1.189E-02 | 8.445E-02 | 49.621   | -0.204 | 5.974E-01 | 8.202E-01 |
| ENSG00000091039 | OSBPL8   | 316.259  | -0.660 | 1.197E-02 | 8.481E-02 | 291.180  | -0.163 | 5.824E-01 | 8.119E-01 |
| ENSG00000088986 | DYNLL1   | 1681.621 | -0.595 | 1.200E-02 | 8.497E-02 | 1711.349 | -0.290 | 1.046E-01 | 3.618E-01 |

|                 |            |          |        |           |           |          |        |           |           |
|-----------------|------------|----------|--------|-----------|-----------|----------|--------|-----------|-----------|
| ENSG00000162139 | NEU3       | 178.164  | -0.726 | 1.202E-02 | 8.504E-02 | 220.554  | -0.398 | 1.207E-01 | 3.906E-01 |
| ENSG00000261324 | AC010168.2 | 54.592   | -1.170 | 1.213E-02 | 8.557E-02 | 40.464   | -0.377 | 3.454E-01 | 6.514E-01 |
| ENSG00000136935 | GOLGA1     | 162.131  | -0.712 | 1.218E-02 | 8.582E-02 | 183.792  | -0.488 | 5.994E-02 | 2.696E-01 |
| ENSG00000151348 | EXT2       | 127.552  | -0.826 | 1.222E-02 | 8.596E-02 | 118.123  | -0.113 | 7.038E-01 | 8.747E-01 |
| ENSG00000174243 | DDX23      | 280.097  | -0.645 | 1.229E-02 | 8.630E-02 | 292.728  | -0.181 | 4.606E-01 | 7.386E-01 |
| ENSG00000102096 | PIM2       | 300.660  | -0.669 | 1.230E-02 | 8.632E-02 | 246.600  | -0.015 | 9.572E-01 | 9.839E-01 |
| ENSG00000183145 | RIPPLY3    | 58.372   | -0.956 | 1.240E-02 | 8.678E-02 | 34.543   | 0.114  | 7.761E-01 | 9.088E-01 |
| ENSG00000163110 | PDLIM5     | 1431.994 | -0.501 | 1.252E-02 | 8.743E-02 | 1027.859 | -0.094 | 6.388E-01 | 8.432E-01 |
| ENSG00000151665 | PIGF       | 99.711   | -0.969 | 1.264E-02 | 8.788E-02 | 74.811   | -0.174 | 6.510E-01 | 8.495E-01 |
| ENSG00000021776 | AQR        | 203.463  | -0.687 | 1.270E-02 | 8.816E-02 | 187.156  | -0.127 | 6.543E-01 | 8.507E-01 |
| ENSG00000244005 | NFS1       | 254.991  | -0.693 | 1.271E-02 | 8.821E-02 | 297.402  | -0.484 | 2.740E-02 | 1.741E-01 |
| ENSG00000182108 | DEXI       | 651.717  | -0.546 | 1.273E-02 | 8.832E-02 | 872.368  | -0.492 | 1.057E-02 | 1.005E-01 |
| ENSG00000152818 | UTRN       | 550.155  | -0.750 | 1.277E-02 | 8.841E-02 | 589.532  | -0.332 | 1.111E-01 | 3.725E-01 |
| ENSG00000145287 | PLAC8      | 35.687   | -1.166 | 1.290E-02 | 8.904E-02 | 62.518   | 0.342  | 3.443E-01 | 6.510E-01 |
| ENSG00000148773 | MKI67      | 1519.686 | -0.688 | 1.299E-02 | 8.939E-02 | 1324.531 | -0.463 | 1.708E-02 | 1.340E-01 |
| ENSG00000119523 | ALG2       | 338.917  | -0.597 | 1.298E-02 | 8.939E-02 | 266.060  | -0.260 | 2.891E-01 | 5.997E-01 |
| ENSG00000172534 | HCFC1      | 1070.923 | -0.510 | 1.307E-02 | 8.984E-02 | 1014.008 | -0.253 | 1.978E-01 | 4.991E-01 |
| ENSG00000163884 | KLF15      | 30.723   | -1.220 | 1.319E-02 | 9.028E-02 | 9.590    | 0.717  | 7.197E-02 | NA        |
| ENSG00000090612 | ZNF268     | 106.288  | -0.852 | 1.316E-02 | 9.028E-02 | 97.730   | -0.150 | 6.331E-01 | 8.411E-01 |
| ENSG00000099864 | PALM       | 256.386  | -0.714 | 1.319E-02 | 9.028E-02 | 269.261  | -0.349 | 2.690E-01 | 5.785E-01 |
| ENSG00000243364 | EFNA4      | 44.955   | -1.232 | 1.333E-02 | 9.107E-02 | 47.786   | -0.229 | 5.683E-01 | 8.036E-01 |
| ENSG00000134453 | RBM17      | 1569.364 | 0.466  | 1.344E-02 | 9.153E-02 | 1088.474 | 0.628  | 2.839E-03 | 4.365E-02 |
| ENSG00000035499 | DEPDC1B    | 227.914  | -0.790 | 1.346E-02 | 9.160E-02 | 153.784  | -0.134 | 6.353E-01 | 8.417E-01 |
| ENSG00000214290 | COLCA2     | 76.532   | -0.989 | 1.368E-02 | 9.269E-02 | 68.549   | 0.128  | 7.439E-01 | 8.937E-01 |
| ENSG00000172164 | SNTB1      | 388.377  | -0.828 | 1.373E-02 | 9.287E-02 | 264.620  | 0.246  | 3.774E-01 | 6.781E-01 |
| ENSG00000129562 | DAD1       | 657.538  | -0.521 | 1.376E-02 | 9.299E-02 | 852.685  | -0.290 | 9.618E-02 | 3.447E-01 |

|                 |               |          |        |           |           |          |        |           |           |
|-----------------|---------------|----------|--------|-----------|-----------|----------|--------|-----------|-----------|
| ENSG00000144677 | CTDSPL        | 352.135  | -0.602 | 1.384E-02 | 9.334E-02 | 276.648  | -0.128 | 6.042E-01 | 8.251E-01 |
| ENSG00000198585 | NUDT16        | 170.029  | -0.720 | 1.395E-02 | 9.384E-02 | 166.158  | -0.009 | 9.729E-01 | 9.894E-01 |
| ENSG00000107789 | MINPP1        | 160.383  | -0.714 | 1.413E-02 | 9.463E-02 | 158.241  | -0.237 | 4.146E-01 | 7.075E-01 |
| ENSG00000146215 | CRIP3         | 41.092   | -1.081 | 1.415E-02 | 9.464E-02 | 23.039   | -0.816 | 5.067E-02 | 2.451E-01 |
| ENSG00000115884 | SDC1          | 859.669  | -0.539 | 1.422E-02 | 9.500E-02 | 491.412  | -0.183 | 4.422E-01 | 7.229E-01 |
| ENSG00000144045 | DQX1          | 134.095  | -0.843 | 1.430E-02 | 9.528E-02 | 111.381  | -0.290 | 3.568E-01 | 6.628E-01 |
| ENSG00000135317 | SNX14         | 278.320  | -0.657 | 1.438E-02 | 9.548E-02 | 308.062  | -0.423 | 6.952E-02 | 2.888E-01 |
| ENSG00000171848 | RRM2          | 961.900  | -0.525 | 1.438E-02 | 9.548E-02 | 725.154  | -0.225 | 3.200E-01 | 6.291E-01 |
| ENSG00000104687 | GSR           | 1456.324 | 0.497  | 1.438E-02 | 9.548E-02 | 1016.910 | 0.697  | 5.052E-04 | 1.424E-02 |
| ENSG00000267010 | RP11-108P20.1 | 35.159   | -1.131 | 1.441E-02 | 9.559E-02 | 27.340   | -0.509 | 2.065E-01 | 5.091E-01 |
| ENSG00000160209 | PDXK          | 645.657  | -0.525 | 1.449E-02 | 9.582E-02 | 509.687  | -0.337 | 9.795E-02 | 3.485E-01 |
| ENSG00000158186 | MRAS          | 126.640  | -0.751 | 1.463E-02 | 9.647E-02 | 230.929  | -0.192 | 4.993E-01 | 7.602E-01 |
| ENSG00000221890 | NPTXR         | 194.269  | -0.771 | 1.475E-02 | 9.702E-02 | 207.861  | -0.172 | 4.982E-01 | 7.599E-01 |
| ENSG00000014216 | CAPN1         | 211.751  | -0.673 | 1.480E-02 | 9.718E-02 | 236.726  | -0.256 | 3.051E-01 | 6.153E-01 |
| ENSG00000079385 | CEACAM1       | 88.615   | -0.970 | 1.489E-02 | 9.742E-02 | 70.028   | -0.076 | 8.355E-01 | 9.350E-01 |
| ENSG00000136231 | IGF2BP3       | 312.563  | -0.714 | 1.489E-02 | 9.742E-02 | 434.610  | -0.391 | 5.023E-02 | 2.435E-01 |
| ENSG00000139651 | ZNF740        | 56.621   | -1.080 | 1.515E-02 | 9.842E-02 | 49.236   | -0.314 | 4.124E-01 | 7.061E-01 |
| ENSG00000163297 | ANTXR2        | 48.707   | -1.006 | 1.518E-02 | 9.854E-02 | 20.242   | -0.230 | 5.813E-01 | NA        |
| ENSG00000178764 | ZHX2          | 122.991  | -0.934 | 1.519E-02 | 9.854E-02 | 97.007   | -0.163 | 6.451E-01 | 8.463E-01 |
| ENSG00000178921 | PFAS          | 172.958  | -0.730 | 1.524E-02 | 9.875E-02 | 157.060  | -0.200 | 4.739E-01 | 7.471E-01 |
| ENSG00000157379 | DHRS1         | 1284.959 | -0.544 | 1.527E-02 | 9.885E-02 | 1499.429 | -0.436 | 2.514E-02 | 1.672E-01 |
| ENSG00000124217 | MOCS3         | 65.732   | -1.062 | 1.548E-02 | 9.988E-02 | 59.152   | -0.274 | 4.247E-01 | 7.133E-01 |
| ENSG00000102763 | VWA8          | 50.302   | -1.010 | 1.558E-02 | 1.003E-01 | 58.190   | -0.294 | 3.989E-01 | 6.972E-01 |
| ENSG00000140406 | TLNRD1        | 261.605  | -0.676 | 1.558E-02 | 1.003E-01 | 195.615  | -0.280 | 3.101E-01 | 6.196E-01 |
| ENSG00000166133 | RPUSD2        | 183.183  | -0.681 | 1.576E-02 | 1.012E-01 | 146.637  | -0.073 | 7.967E-01 | 9.187E-01 |
| ENSG00000154269 | ENPP3         | 44.863   | -1.176 | 1.597E-02 | 1.021E-01 | 43.175   | 0.194  | 6.096E-01 | 8.279E-01 |

|                 |          |          |        |           |           |         |        |           |           |
|-----------------|----------|----------|--------|-----------|-----------|---------|--------|-----------|-----------|
| ENSG00000130713 | EXOSC2   | 130.662  | -0.765 | 1.602E-02 | 1.023E-01 | 130.682 | -0.293 | 3.333E-01 | 6.408E-01 |
| ENSG00000175283 | DOLK     | 58.226   | -0.920 | 1.611E-02 | 1.026E-01 | 49.878  | -0.328 | 3.912E-01 | 6.894E-01 |
| ENSG00000241935 | HOGA1    | 72.276   | -0.900 | 1.610E-02 | 1.026E-01 | 42.973  | -0.286 | 4.730E-01 | 7.468E-01 |
| ENSG00000055130 | CUL1     | 280.884  | -0.623 | 1.611E-02 | 1.026E-01 | 275.271 | -0.375 | 1.286E-01 | 4.042E-01 |
| ENSG00000168517 | HEXIM2   | 186.752  | -0.706 | 1.613E-02 | 1.026E-01 | 186.252 | -0.384 | 1.626E-01 | 4.534E-01 |
| ENSG00000135108 | FBXO21   | 218.145  | -0.627 | 1.622E-02 | 1.031E-01 | 206.664 | -0.201 | 4.370E-01 | 7.205E-01 |
| ENSG00000186635 | ARAP1    | 409.293  | -0.717 | 1.624E-02 | 1.031E-01 | 295.552 | 0.022  | 9.442E-01 | 9.794E-01 |
| ENSG00000105176 | URI1     | 1007.447 | -0.642 | 1.650E-02 | 1.043E-01 | 921.612 | -0.361 | 7.020E-02 | 2.899E-01 |
| ENSG00000166562 | SEC11C   | 740.343  | -0.628 | 1.651E-02 | 1.043E-01 | 617.798 | 0.025  | 9.087E-01 | 9.666E-01 |
| ENSG00000164068 | RNF123   | 184.247  | -0.769 | 1.686E-02 | 1.062E-01 | 190.281 | -0.480 | 6.266E-02 | 2.750E-01 |
| ENSG00000189306 | RRP7A    | 350.466  | -0.586 | 1.695E-02 | 1.065E-01 | 302.024 | -0.472 | 6.955E-02 | 2.888E-01 |
| ENSG00000185298 | CCDC137  | 433.608  | -0.645 | 1.699E-02 | 1.067E-01 | 301.821 | -0.357 | 1.866E-01 | 4.857E-01 |
| ENSG00000087274 | ADD1     | 463.297  | -0.569 | 1.706E-02 | 1.069E-01 | 534.723 | -0.255 | 2.160E-01 | 5.213E-01 |
| ENSG00000052795 | FNIP2    | 283.512  | -0.629 | 1.720E-02 | 1.077E-01 | 224.414 | -0.233 | 3.632E-01 | 6.680E-01 |
| ENSG00000143815 | LBR      | 814.857  | -0.542 | 1.740E-02 | 1.087E-01 | 660.984 | -0.268 | 2.271E-01 | 5.320E-01 |
| ENSG00000075711 | DLG1     | 507.993  | -0.614 | 1.743E-02 | 1.089E-01 | 510.978 | -0.384 | 7.239E-02 | 2.948E-01 |
| ENSG00000072310 | SREBF1   | 74.685   | -0.878 | 1.768E-02 | 1.102E-01 | 59.578  | 0.056  | 8.740E-01 | 9.523E-01 |
| ENSG00000152284 | TCF7L1   | 35.687   | -1.068 | 1.772E-02 | 1.102E-01 | 44.769  | -0.302 | 4.243E-01 | 7.132E-01 |
| ENSG00000101138 | CSTF1    | 237.331  | -0.610 | 1.780E-02 | 1.105E-01 | 235.310 | -0.151 | 5.288E-01 | 7.821E-01 |
| ENSG00000139266 | MARCH9   | 41.068   | -1.030 | 1.782E-02 | 1.105E-01 | 45.071  | -0.374 | 3.213E-01 | 6.294E-01 |
| ENSG00000160094 | ZNF362   | 172.679  | -0.702 | 1.783E-02 | 1.105E-01 | 260.959 | -0.251 | 2.996E-01 | 6.100E-01 |
| ENSG00000101004 | NINL     | 164.713  | -0.709 | 1.792E-02 | 1.108E-01 | 215.243 | -0.131 | 6.683E-01 | 8.572E-01 |
| ENSG00000163939 | PBRM1    | 418.601  | -0.551 | 1.799E-02 | 1.109E-01 | 399.219 | -0.383 | 7.687E-02 | 3.049E-01 |
| ENSG00000119559 | C19orf25 | 123.959  | -0.731 | 1.811E-02 | 1.114E-01 | 142.186 | -0.253 | 4.117E-01 | 7.054E-01 |
| ENSG00000173064 | HECTD4   | 69.950   | -0.871 | 1.819E-02 | 1.118E-01 | 73.597  | -0.265 | 4.188E-01 | 7.095E-01 |
| ENSG00000163624 | CDS1     | 53.817   | -1.018 | 1.823E-02 | 1.119E-01 | 117.638 | -0.207 | 5.035E-01 | 7.637E-01 |

|                 |            |          |        |           |           |         |        |           |           |
|-----------------|------------|----------|--------|-----------|-----------|---------|--------|-----------|-----------|
| ENSG00000239382 | ALKBH6     | 44.896   | -1.179 | 1.827E-02 | 1.120E-01 | 44.504  | -0.253 | 4.969E-01 | 7.593E-01 |
| ENSG00000140396 | NCOA2      | 125.999  | -0.735 | 1.826E-02 | 1.120E-01 | 182.799 | -0.167 | 5.236E-01 | 7.782E-01 |
| ENSG00000159228 | CBR1       | 71.738   | -0.857 | 1.829E-02 | 1.121E-01 | 98.536  | -0.303 | 3.424E-01 | 6.489E-01 |
| ENSG00000106399 | RPA3       | 422.921  | -0.664 | 1.864E-02 | 1.138E-01 | 421.056 | -0.213 | 2.993E-01 | 6.098E-01 |
| ENSG00000139636 | LMBR1L     | 53.363   | -0.994 | 1.872E-02 | 1.140E-01 | 55.515  | -0.434 | 2.591E-01 | 5.693E-01 |
| ENSG00000166140 | ZFYVE19    | 81.153   | -0.838 | 1.872E-02 | 1.140E-01 | 102.579 | 0.081  | 8.059E-01 | 9.226E-01 |
| ENSG00000130338 | TULP4      | 262.924  | -0.596 | 1.937E-02 | 1.168E-01 | 342.033 | 0.007  | 9.775E-01 | 9.909E-01 |
| ENSG00000119906 | SLF2       | 255.581  | -0.628 | 1.947E-02 | 1.173E-01 | 265.222 | -0.481 | 4.940E-02 | 2.416E-01 |
| ENSG00000100523 | DDHD1      | 79.657   | -0.871 | 1.951E-02 | 1.175E-01 | 91.739  | -0.111 | 7.260E-01 | 8.861E-01 |
| ENSG00000198099 | ADH4       | 155.807  | -0.798 | 1.960E-02 | 1.179E-01 | 86.426  | -0.438 | 1.941E-01 | 4.953E-01 |
| ENSG00000188938 | FAM120AOS  | 128.914  | -0.699 | 1.973E-02 | 1.183E-01 | 211.330 | -0.290 | 2.785E-01 | 5.891E-01 |
| ENSG00000122692 | SMU1       | 200.038  | -0.642 | 2.003E-02 | 1.195E-01 | 173.263 | -0.069 | 7.949E-01 | 9.181E-01 |
| ENSG00000198734 | F5         | 322.453  | -0.575 | 2.008E-02 | 1.197E-01 | 373.899 | -0.222 | 3.125E-01 | 6.222E-01 |
| ENSG00000112167 | SAYSD1     | 89.720   | -0.794 | 2.020E-02 | 1.202E-01 | 127.327 | -0.094 | 7.343E-01 | 8.898E-01 |
| ENSG00000070814 | TCOF1      | 1437.394 | 0.485  | 2.029E-02 | 1.207E-01 | 819.748 | 0.693  | 4.718E-04 | 1.356E-02 |
| ENSG00000160208 | RRP1B      | 586.221  | -0.506 | 2.034E-02 | 1.209E-01 | 653.661 | 0.216  | 3.001E-01 | 6.103E-01 |
| ENSG00000224331 | AC019181.1 | 33.305   | -1.071 | 2.045E-02 | 1.213E-01 | 29.291  | -0.551 | 1.877E-01 | 4.870E-01 |
| ENSG00000115970 | THADA      | 203.513  | -0.653 | 2.047E-02 | 1.214E-01 | 186.704 | 0.112  | 6.717E-01 | 8.586E-01 |
| ENSG00000261061 | AC092718.4 | 186.022  | -0.716 | 2.054E-02 | 1.218E-01 | 170.447 | -0.002 | 9.946E-01 | 9.981E-01 |
| ENSG00000111665 | CDCA3      | 241.266  | -0.610 | 2.055E-02 | 1.218E-01 | 216.060 | -0.266 | 3.120E-01 | 6.220E-01 |
| ENSG00000006715 | VPS41      | 147.918  | -0.699 | 2.067E-02 | 1.224E-01 | 212.698 | -0.427 | 7.983E-02 | 3.123E-01 |
| ENSG00000153363 | LINC00467  | 39.495   | -0.999 | 2.070E-02 | 1.225E-01 | 73.453  | -0.338 | 3.009E-01 | 6.113E-01 |
| ENSG00000068654 | POLR1A     | 276.752  | -0.675 | 2.083E-02 | 1.230E-01 | 251.565 | -0.351 | 1.803E-01 | 4.780E-01 |
| ENSG00000121957 | GPSM2      | 46.900   | -0.960 | 2.097E-02 | 1.236E-01 | 87.253  | -0.317 | 3.340E-01 | 6.414E-01 |
| ENSG00000116127 | ALMS1      | 122.635  | -0.751 | 2.115E-02 | 1.244E-01 | 151.850 | -0.057 | 8.294E-01 | 9.324E-01 |
| ENSG00000196975 | ANXA4      | 517.662  | -0.785 | 2.135E-02 | 1.253E-01 | 433.661 | -0.183 | 4.335E-01 | 7.186E-01 |

|                 |           |         |        |           |           |         |        |           |           |
|-----------------|-----------|---------|--------|-----------|-----------|---------|--------|-----------|-----------|
| ENSG00000175387 | SMAD2     | 300.490 | -0.556 | 2.157E-02 | 1.262E-01 | 364.819 | -0.088 | 6.762E-01 | 8.607E-01 |
| ENSG00000169856 | ONECUT1   | 35.486  | -1.135 | 2.178E-02 | 1.271E-01 | 48.983  | -0.442 | 2.565E-01 | 5.668E-01 |
| ENSG00000240225 | ZNF542P   | 85.678  | -1.001 | 2.188E-02 | 1.274E-01 | 55.084  | 0.052  | 8.835E-01 | 9.551E-01 |
| ENSG00000174516 | PELI3     | 34.699  | -1.054 | 2.194E-02 | 1.277E-01 | 43.071  | -0.429 | 2.404E-01 | 5.476E-01 |
| ENSG00000158792 | SPATA2L   | 40.148  | -1.027 | 2.196E-02 | 1.277E-01 | 33.859  | -0.279 | 5.020E-01 | 7.624E-01 |
| ENSG00000186715 | MST1L     | 178.684 | -0.765 | 2.199E-02 | 1.279E-01 | 158.317 | -0.072 | 8.306E-01 | 9.330E-01 |
| ENSG00000163781 | TOPBP1    | 275.309 | -0.638 | 2.203E-02 | 1.279E-01 | 255.961 | -0.282 | 2.190E-01 | 5.243E-01 |
| ENSG00000118600 | RXYLT1    | 36.353  | -1.160 | 2.213E-02 | 1.283E-01 | 93.004  | 0.049  | 8.835E-01 | 9.551E-01 |
| ENSG00000010818 | HIVEP2    | 29.994  | 1.109  | 2.211E-02 | 1.283E-01 | 69.661  | 1.177  | 1.315E-03 | 2.614E-02 |
| ENSG00000211445 | GPX3      | 226.564 | -0.598 | 2.239E-02 | 1.292E-01 | 167.055 | -0.405 | 1.934E-01 | 4.942E-01 |
| ENSG00000196236 | XPNPEP3   | 108.631 | -0.837 | 2.259E-02 | 1.301E-01 | 120.399 | -0.409 | 2.001E-01 | 5.023E-01 |
| ENSG00000113384 | GOLPH3    | 523.119 | -0.506 | 2.261E-02 | 1.301E-01 | 447.668 | 0.133  | 5.637E-01 | 8.011E-01 |
| ENSG00000137944 | KYAT3     | 103.792 | -0.767 | 2.268E-02 | 1.302E-01 | 116.126 | -0.131 | 6.549E-01 | 8.510E-01 |
| ENSG00000249550 | LINC01234 | 33.150  | -1.035 | 2.270E-02 | 1.303E-01 | 37.065  | -0.203 | 5.942E-01 | 8.187E-01 |
| ENSG00000108219 | TSPAN14   | 367.015 | -0.642 | 2.270E-02 | 1.303E-01 | 183.089 | -0.247 | 3.381E-01 | 6.463E-01 |
| ENSG00000135916 | ITM2C     | 112.056 | -0.929 | 2.278E-02 | 1.306E-01 | 127.646 | -0.119 | 6.726E-01 | 8.593E-01 |
| ENSG00000106133 | NSUN5P2   | 48.838  | -0.930 | 2.281E-02 | 1.307E-01 | 41.703  | -0.306 | 4.396E-01 | 7.218E-01 |
| ENSG00000131504 | DIAPH1    | 652.517 | -0.559 | 2.284E-02 | 1.307E-01 | 773.080 | -0.457 | 1.674E-02 | 1.326E-01 |
| ENSG00000198792 | TMEM184B  | 144.129 | -0.761 | 2.294E-02 | 1.310E-01 | 105.623 | -0.015 | 9.609E-01 | 9.844E-01 |
| ENSG00000159063 | ALG8      | 316.832 | -0.596 | 2.302E-02 | 1.313E-01 | 323.357 | -0.134 | 5.784E-01 | 8.093E-01 |
| ENSG00000213463 | SYNJ2BP   | 159.107 | -0.722 | 2.312E-02 | 1.317E-01 | 186.556 | -0.409 | 1.273E-01 | 4.028E-01 |
| ENSG00000127603 | MACF1     | 867.038 | -0.502 | 2.313E-02 | 1.317E-01 | 993.793 | -0.339 | 6.379E-02 | 2.774E-01 |
| ENSG00000253797 | UTP14C    | 135.588 | -0.832 | 2.326E-02 | 1.321E-01 | 99.178  | -0.079 | 8.070E-01 | 9.231E-01 |
| ENSG00000088812 | ATRN      | 276.386 | -0.620 | 2.337E-02 | 1.325E-01 | 205.358 | -0.097 | 7.364E-01 | 8.906E-01 |
| ENSG00000148396 | SEC16A    | 225.600 | -0.678 | 2.345E-02 | 1.328E-01 | 281.182 | -0.409 | 1.477E-01 | 4.344E-01 |
| ENSG00000133740 | E2F5      | 49.109  | -1.072 | 2.351E-02 | 1.330E-01 | 45.216  | -0.391 | 3.322E-01 | 6.399E-01 |



|                 |             |          |        |           |           |          |        |           |           |
|-----------------|-------------|----------|--------|-----------|-----------|----------|--------|-----------|-----------|
| ENSG00000206052 | DOK6        | 205.481  | -0.625 | 2.354E-02 | 1.330E-01 | 209.190  | 0.362  | 1.355E-01 | 4.159E-01 |
| ENSG00000120159 | CAAP1       | 136.826  | -0.728 | 2.364E-02 | 1.333E-01 | 139.752  | -0.341 | 2.275E-01 | 5.327E-01 |
| ENSG00000136450 | SRSF1       | 1336.232 | -1.043 | 2.372E-02 | 1.336E-01 | 888.961  | -0.007 | 9.783E-01 | 9.912E-01 |
| ENSG00000027847 | B4GALT7     | 170.920  | -0.720 | 2.398E-02 | 1.344E-01 | 126.860  | -0.368 | 2.385E-01 | 5.456E-01 |
| ENSG00000102100 | SLC35A2     | 267.569  | -0.586 | 2.393E-02 | 1.344E-01 | 222.031  | 0.378  | 1.294E-01 | 4.057E-01 |
| ENSG00000167395 | ZNF646      | 62.304   | -0.903 | 2.417E-02 | 1.351E-01 | 55.449   | -0.415 | 2.387E-01 | 5.459E-01 |
| ENSG00000136237 | RAPGEF5     | 146.935  | -0.752 | 2.420E-02 | 1.351E-01 | 129.884  | 0.032  | 9.171E-01 | 9.692E-01 |
| ENSG00000151715 | TMEM45B     | 160.570  | -0.742 | 2.423E-02 | 1.351E-01 | 147.861  | -0.322 | 2.512E-01 | 5.602E-01 |
| ENSG00000123472 | ATPAF1      | 226.778  | -0.572 | 2.419E-02 | 1.351E-01 | 189.037  | -0.287 | 2.869E-01 | 5.979E-01 |
| ENSG00000135775 | COG2        | 95.817   | -0.785 | 2.439E-02 | 1.359E-01 | 120.828  | -0.158 | 6.026E-01 | 8.240E-01 |
| ENSG00000125520 | SLC2A4RG    | 1335.514 | -0.506 | 2.455E-02 | 1.366E-01 | 1602.466 | -0.172 | 3.389E-01 | 6.469E-01 |
| ENSG00000112984 | KIF20A      | 280.539  | -0.633 | 2.463E-02 | 1.370E-01 | 187.842  | 0.109  | 6.915E-01 | 8.684E-01 |
| ENSG00000242193 | CRYZL2P     | 51.777   | -0.970 | 2.499E-02 | 1.383E-01 | 31.152   | -0.119 | 7.701E-01 | 9.054E-01 |
| ENSG00000198736 | MSRB1       | 461.023  | -0.517 | 2.503E-02 | 1.384E-01 | 356.325  | -0.428 | 8.741E-02 | 3.279E-01 |
| ENSG00000113594 | LIFR        | 117.001  | -0.776 | 2.541E-02 | 1.398E-01 | 121.070  | -0.081 | 7.935E-01 | 9.176E-01 |
| ENSG00000110042 | DTX4        | 188.883  | -0.618 | 2.541E-02 | 1.398E-01 | 153.341  | -0.431 | 1.156E-01 | 3.813E-01 |
| ENSG00000210191 | MT-TL2      | 30.275   | -1.163 | 2.547E-02 | 1.400E-01 | 27.070   | -1.108 | 8.291E-03 | 8.718E-02 |
| ENSG00000105707 | HPN         | 179.251  | -0.747 | 2.566E-02 | 1.409E-01 | 206.855  | -0.375 | 1.721E-01 | 4.676E-01 |
| ENSG00000170485 | NPAS2       | 101.414  | -0.902 | 2.597E-02 | 1.421E-01 | 95.896   | -0.046 | 8.798E-01 | 9.538E-01 |
| ENSG00000065029 | ZNF76       | 103.390  | -0.762 | 2.615E-02 | 1.426E-01 | 133.334  | -0.268 | 4.088E-01 | 7.033E-01 |
| ENSG00000130309 | COLGALT1    | 822.642  | -0.719 | 2.626E-02 | 1.430E-01 | 473.739  | -0.468 | 2.608E-01 | 5.707E-01 |
| ENSG00000090520 | DNAJB11     | 797.146  | 0.489  | 2.642E-02 | 1.435E-01 | 514.260  | 0.613  | 3.032E-03 | 4.586E-02 |
| ENSG00000172340 | SUCLG2      | 263.049  | -0.648 | 2.646E-02 | 1.436E-01 | 261.883  | -0.045 | 8.523E-01 | 9.443E-01 |
| ENSG00000115756 | HPCAL1      | 899.310  | 0.471  | 2.660E-02 | 1.441E-01 | 687.986  | 0.598  | 1.241E-03 | 2.550E-02 |
| ENSG00000226419 | SLC16A1-AS1 | 106.327  | -0.791 | 2.673E-02 | 1.446E-01 | 129.307  | -0.124 | 6.599E-01 | 8.532E-01 |
| ENSG00000108406 | DHX40       | 111.703  | -0.773 | 2.684E-02 | 1.450E-01 | 361.880  | -0.442 | 5.130E-02 | 2.473E-01 |

|                 |            |          |        |           |           |          |        |           |           |
|-----------------|------------|----------|--------|-----------|-----------|----------|--------|-----------|-----------|
| ENSG00000106351 | AGFG2      | 211.257  | -0.663 | 2.691E-02 | 1.453E-01 | 187.829  | -0.179 | 5.148E-01 | 7.709E-01 |
| ENSG00000176658 | MYO1D      | 121.317  | -0.744 | 2.703E-02 | 1.457E-01 | 93.263   | -0.217 | 4.740E-01 | 7.471E-01 |
| ENSG00000168140 | VASN       | 46.084   | -1.021 | 2.715E-02 | 1.460E-01 | 26.781   | -1.351 | 8.041E-04 | 1.952E-02 |
| ENSG00000149792 | MRPL49     | 419.118  | -0.595 | 2.725E-02 | 1.462E-01 | 293.377  | -0.071 | 7.775E-01 | 9.097E-01 |
| ENSG00000103479 | RBL2       | 148.921  | -0.753 | 2.752E-02 | 1.473E-01 | 160.278  | -0.344 | 2.147E-01 | 5.190E-01 |
| ENSG00000204876 | AC021218.1 | 46.279   | -0.990 | 2.758E-02 | 1.475E-01 | 73.852   | -0.370 | 3.208E-01 | 6.294E-01 |
| ENSG00000237649 | KIFC1      | 316.541  | -0.554 | 2.762E-02 | 1.476E-01 | 267.084  | -0.348 | 1.540E-01 | 4.423E-01 |
| ENSG00000107798 | LIPA       | 115.695  | -0.772 | 2.773E-02 | 1.480E-01 | 124.906  | -0.360 | 2.298E-01 | 5.353E-01 |
| ENSG00000103111 | MON1B      | 333.866  | -0.625 | 2.782E-02 | 1.482E-01 | 240.707  | -0.493 | 7.805E-02 | 3.073E-01 |
| ENSG00000102038 | SMARCA1    | 1528.007 | -0.550 | 2.818E-02 | 1.496E-01 | 1513.059 | -0.498 | 5.200E-03 | 6.550E-02 |
| ENSG00000101337 | TM9SF4     | 372.339  | -0.616 | 2.822E-02 | 1.497E-01 | 234.379  | 0.123  | 6.413E-01 | 8.446E-01 |
| ENSG00000080986 | NDC80      | 278.367  | -0.607 | 2.828E-02 | 1.499E-01 | 230.384  | 0.070  | 7.759E-01 | 9.088E-01 |
| ENSG00000054654 | SYNE2      | 208.340  | -0.791 | 2.836E-02 | 1.500E-01 | 283.752  | -0.424 | 6.535E-02 | 2.799E-01 |
| ENSG00000168802 | CHTF8      | 494.740  | -0.574 | 2.859E-02 | 1.508E-01 | 490.433  | -0.400 | 4.929E-02 | 2.414E-01 |
| ENSG00000163558 | PRKCI      | 126.319  | -0.784 | 2.871E-02 | 1.509E-01 | 128.277  | -0.097 | 7.435E-01 | 8.937E-01 |
| ENSG00000100413 | POLR3H     | 206.011  | -0.730 | 2.870E-02 | 1.509E-01 | 175.408  | -0.479 | 9.171E-02 | 3.362E-01 |
| ENSG00000204580 | DDR1       | 512.889  | 0.493  | 2.865E-02 | 1.509E-01 | 534.571  | 0.620  | 2.300E-03 | 3.798E-02 |
| ENSG00000119318 | RAD23B     | 1264.710 | 0.475  | 2.885E-02 | 1.512E-01 | 1263.475 | 0.504  | 1.998E-02 | 1.486E-01 |
| ENSG00000149782 | PLCB3      | 130.973  | -0.706 | 2.938E-02 | 1.534E-01 | 110.185  | -0.375 | 2.777E-01 | 5.882E-01 |
| ENSG00000259494 | MRPL46     | 485.217  | -0.642 | 2.946E-02 | 1.535E-01 | 361.989  | -0.137 | 5.161E-01 | 7.717E-01 |
| ENSG00000272931 | AC099568.2 | 46.746   | -0.897 | 2.986E-02 | 1.547E-01 | 46.147   | 0.455  | 2.447E-01 | 5.533E-01 |
| ENSG00000010539 | ZNF200     | 81.811   | -0.747 | 3.002E-02 | 1.554E-01 | 59.872   | -0.499 | 1.511E-01 | 4.384E-01 |
| ENSG00000101049 | SGK2       | 109.992  | -0.771 | 3.014E-02 | 1.559E-01 | 89.124   | 0.055  | 8.550E-01 | 9.447E-01 |
| ENSG00000215252 | GOLGA8B    | 338.862  | 0.495  | 3.021E-02 | 1.562E-01 | 387.472  | 0.539  | 1.014E-02 | 9.810E-02 |
| ENSG00000167258 | CDK12      | 1058.424 | -0.540 | 3.029E-02 | 1.562E-01 | 1044.457 | -0.480 | 1.561E-02 | 1.278E-01 |
| ENSG00000204310 | AGPAT1     | 523.047  | -0.511 | 3.044E-02 | 1.568E-01 | 594.974  | -0.360 | 1.516E-01 | 4.393E-01 |

|                 |              |          |        |           |           |          |        |           |           |
|-----------------|--------------|----------|--------|-----------|-----------|----------|--------|-----------|-----------|
| ENSG00000054277 | OPN3         | 136.032  | -0.702 | 3.054E-02 | 1.572E-01 | 140.960  | -0.395 | 1.504E-01 | 4.377E-01 |
| ENSG00000117834 | SLC5A9       | 47.426   | -0.903 | 3.059E-02 | 1.574E-01 | 92.880   | -0.287 | 4.227E-01 | 7.122E-01 |
| ENSG00000036257 | CUL3         | 246.487  | -0.642 | 3.071E-02 | 1.579E-01 | 209.546  | -0.223 | 4.222E-01 | 7.120E-01 |
| ENSG00000120137 | PANK3        | 338.410  | -0.566 | 3.084E-02 | 1.583E-01 | 168.458  | 0.049  | 8.633E-01 | 9.480E-01 |
| ENSG00000099889 | ARVCF        | 50.196   | -0.983 | 3.086E-02 | 1.584E-01 | 61.344   | -0.199 | 5.635E-01 | 8.011E-01 |
| ENSG00000188486 | H2AFX        | 438.154  | -0.578 | 3.104E-02 | 1.590E-01 | 313.109  | -0.057 | 8.146E-01 | 9.256E-01 |
| ENSG00000130427 | EPO          | 80.348   | -0.820 | 3.114E-02 | 1.593E-01 | 25.166   | -0.181 | 6.640E-01 | 8.547E-01 |
| ENSG00000117139 | KDM5B        | 221.617  | -0.601 | 3.117E-02 | 1.594E-01 | 272.507  | -0.395 | 7.472E-02 | 3.006E-01 |
| ENSG00000129460 | NGDN         | 1755.829 | 0.458  | 3.120E-02 | 1.595E-01 | 1269.339 | 1.014  | 4.634E-06 | 3.794E-04 |
| ENSG00000130429 | ARPC1B       | 453.048  | -0.605 | 3.128E-02 | 1.596E-01 | 533.381  | -0.363 | 7.892E-02 | 3.094E-01 |
| ENSG00000162881 | OXER1        | 30.351   | -1.107 | 3.135E-02 | 1.599E-01 | 21.712   | -0.576 | 1.689E-01 | NA        |
| ENSG00000100246 | DNAL4        | 76.296   | -0.809 | 3.175E-02 | 1.614E-01 | 76.198   | -0.393 | 2.233E-01 | 5.282E-01 |
| ENSG00000134461 | ANKRD16      | 63.171   | -0.820 | 3.178E-02 | 1.615E-01 | 63.093   | 0.256  | 4.733E-01 | 7.468E-01 |
| ENSG00000126787 | DLGAP5       | 281.895  | -0.717 | 3.216E-02 | 1.628E-01 | 199.336  | -0.221 | 3.666E-01 | 6.710E-01 |
| ENSG00000113273 | ARSB         | 142.279  | -0.716 | 3.217E-02 | 1.628E-01 | 72.248   | 0.223  | 5.048E-01 | 7.642E-01 |
| ENSG00000141424 | SLC39A6      | 316.348  | -0.553 | 3.263E-02 | 1.643E-01 | 309.029  | -0.176 | 4.286E-01 | 7.158E-01 |
| ENSG00000049883 | PTCD2        | 46.858   | -0.898 | 3.279E-02 | 1.648E-01 | 81.511   | -0.051 | 8.767E-01 | 9.525E-01 |
| ENSG00000137960 | GIPC2        | 110.249  | -0.740 | 3.291E-02 | 1.651E-01 | 148.562  | -0.300 | 3.357E-01 | 6.435E-01 |
| ENSG00000099330 | OCEL1        | 72.931   | -0.832 | 3.295E-02 | 1.652E-01 | 83.517   | -0.441 | 2.238E-01 | 5.285E-01 |
| ENSG00000080839 | RBL1         | 139.291  | -0.671 | 3.308E-02 | 1.658E-01 | 195.646  | -0.290 | 3.088E-01 | 6.185E-01 |
| ENSG00000152413 | HOMER1       | 249.136  | -0.607 | 3.328E-02 | 1.666E-01 | 218.032  | 0.005  | 9.823E-01 | 9.925E-01 |
| ENSG00000182158 | CREB3L2      | 379.321  | -0.508 | 3.341E-02 | 1.669E-01 | 500.170  | -0.315 | 1.342E-01 | 4.137E-01 |
| ENSG00000272565 | RP11-485G4.2 | 44.594   | -0.913 | 3.356E-02 | 1.675E-01 | 27.438   | -0.664 | 1.139E-01 | 3.779E-01 |
| ENSG00000175595 | ERCC4        | 113.704  | -0.679 | 3.369E-02 | 1.679E-01 | 155.209  | -0.099 | 7.050E-01 | 8.754E-01 |
| ENSG00000103404 | USP31        | 390.619  | 0.498  | 3.416E-02 | 1.695E-01 | 300.423  | 0.513  | 5.304E-02 | 2.519E-01 |
| ENSG00000109066 | TMEM104      | 103.860  | -0.727 | 3.425E-02 | 1.699E-01 | 75.184   | -0.229 | 5.083E-01 | 7.666E-01 |

|                 |            |          |        |           |           |          |        |           |           |
|-----------------|------------|----------|--------|-----------|-----------|----------|--------|-----------|-----------|
| ENSG00000257093 | KIAA1147   | 72.897   | -0.825 | 3.428E-02 | 1.700E-01 | 65.079   | -0.163 | 6.581E-01 | 8.528E-01 |
| ENSG00000273247 | AC097376.2 | 69.285   | -0.788 | 3.434E-02 | 1.700E-01 | 63.031   | -0.123 | 7.254E-01 | 8.861E-01 |
| ENSG00000104131 | EIF3J      | 1730.056 | 0.440  | 3.468E-02 | 1.712E-01 | 1941.939 | 0.593  | 1.413E-03 | 2.741E-02 |
| ENSG00000003400 | CASP10     | 94.807   | -0.727 | 3.473E-02 | 1.713E-01 | 94.470   | 0.131  | 7.001E-01 | 8.731E-01 |
| ENSG00000108819 | PPP1R9B    | 124.973  | -0.671 | 3.481E-02 | 1.715E-01 | 115.543  | 0.455  | 1.759E-01 | 4.715E-01 |
| ENSG00000228288 | PCAT6      | 20.936   | 1.109  | 3.484E-02 | 1.716E-01 | 54.037   | 0.741  | 6.184E-02 | 2.734E-01 |
| ENSG00000064225 | ST3GAL6    | 142.416  | -0.651 | 3.486E-02 | 1.716E-01 | 72.231   | 0.001  | 9.977E-01 | 9.994E-01 |
| ENSG00000230269 | LINC02525  | 48.749   | -0.874 | 3.489E-02 | 1.717E-01 | 85.093   | -0.037 | 9.217E-01 | 9.712E-01 |
| ENSG00000169895 | SYAP1      | 684.491  | -0.542 | 3.492E-02 | 1.717E-01 | 853.888  | -0.446 | 1.014E-02 | 9.810E-02 |
| ENSG00000155438 | NIFK       | 718.715  | 0.448  | 3.496E-02 | 1.718E-01 | 594.046  | 0.591  | 4.948E-03 | 6.328E-02 |
| ENSG00000121073 | SLC35B1    | 587.745  | 0.471  | 3.522E-02 | 1.728E-01 | 570.245  | 0.766  | 2.679E-04 | 9.059E-03 |
| ENSG00000178028 | DMAP1      | 83.913   | -0.760 | 3.541E-02 | 1.734E-01 | 47.619   | -0.168 | 6.567E-01 | 8.519E-01 |
| ENSG00000111859 | NEDD9      | 540.882  | -0.498 | 3.541E-02 | 1.734E-01 | 420.914  | 0.510  | 3.093E-02 | 1.875E-01 |
| ENSG00000173120 | KDM2A      | 504.386  | -0.530 | 3.548E-02 | 1.736E-01 | 542.275  | -0.095 | 6.688E-01 | 8.574E-01 |
| ENSG00000146833 | TRIM4      | 165.939  | -0.729 | 3.550E-02 | 1.736E-01 | 251.860  | -0.397 | 9.551E-02 | 3.430E-01 |
| ENSG00000204054 | LINC00963  | 79.332   | -0.813 | 3.565E-02 | 1.738E-01 | 114.626  | -0.205 | 5.403E-01 | 7.878E-01 |
| ENSG00000151849 | CENPJ      | 194.696  | -0.696 | 3.606E-02 | 1.751E-01 | 211.394  | 0.071  | 7.752E-01 | 9.084E-01 |
| ENSG00000145604 | SKP2       | 612.919  | -0.567 | 3.626E-02 | 1.759E-01 | 384.760  | -0.050 | 8.460E-01 | 9.409E-01 |
| ENSG00000131899 | LLGL1      | 113.175  | -0.831 | 3.635E-02 | 1.762E-01 | 100.973  | 0.325  | 4.075E-01 | 7.026E-01 |
| ENSG00000272821 | U62317.3   | 93.546   | -0.894 | 3.645E-02 | 1.762E-01 | 46.699   | -0.026 | 9.489E-01 | 9.810E-01 |
| ENSG00000108984 | MAP2K6     | 92.252   | -0.720 | 3.668E-02 | 1.769E-01 | 72.540   | -0.141 | 6.691E-01 | 8.575E-01 |
| ENSG00000224189 | HAGLR      | 36.470   | -0.965 | 3.670E-02 | 1.769E-01 | 28.379   | 0.566  | 1.567E-01 | 4.470E-01 |
| ENSG00000081087 | OSTM1      | 50.297   | -0.878 | 3.697E-02 | 1.775E-01 | 64.782   | -0.050 | 8.890E-01 | 9.580E-01 |
| ENSG00000100104 | SRRD       | 106.149  | -0.690 | 3.700E-02 | 1.775E-01 | 114.801  | -0.208 | 4.768E-01 | 7.494E-01 |
| ENSG00000111364 | DDX55      | 372.665  | 0.494  | 3.724E-02 | 1.783E-01 | 281.289  | 0.518  | 6.557E-02 | 2.805E-01 |
| ENSG00000129933 | MAU2       | 192.527  | -0.571 | 3.780E-02 | 1.805E-01 | 216.695  | -0.456 | 1.059E-01 | 3.634E-01 |

|                 |          |          |        |           |           |          |        |           |           |
|-----------------|----------|----------|--------|-----------|-----------|----------|--------|-----------|-----------|
| ENSG00000161904 | LEMD2    | 266.353  | -0.591 | 3.810E-02 | 1.812E-01 | 255.799  | 0.023  | 9.305E-01 | 9.750E-01 |
| ENSG00000170144 | HNRNPA3  | 1131.489 | -0.566 | 3.831E-02 | 1.819E-01 | 821.108  | 0.100  | 6.542E-01 | 8.507E-01 |
| ENSG00000063601 | MTMR1    | 64.029   | -0.840 | 3.899E-02 | 1.840E-01 | 56.569   | 0.270  | 4.594E-01 | 7.377E-01 |
| ENSG00000205808 | PLPP6    | 61.405   | -0.871 | 3.904E-02 | 1.841E-01 | 52.386   | -0.212 | 5.483E-01 | 7.916E-01 |
| ENSG00000115042 | FAHD2A   | 48.885   | -0.890 | 3.912E-02 | 1.845E-01 | 45.726   | -0.479 | 2.184E-01 | 5.236E-01 |
| ENSG00000135476 | ESPL1    | 43.196   | -1.031 | 3.928E-02 | 1.849E-01 | 37.686   | -0.053 | 8.905E-01 | 9.586E-01 |
| ENSG00000189114 | BLOC1S3  | 63.931   | -0.792 | 3.927E-02 | 1.849E-01 | 68.006   | -0.394 | 2.728E-01 | 5.826E-01 |
| ENSG00000214022 | REPIN1   | 172.953  | -0.794 | 3.931E-02 | 1.849E-01 | 288.768  | -0.167 | 4.854E-01 | 7.530E-01 |
| ENSG00000140263 | SORD     | 97.571   | -0.714 | 3.948E-02 | 1.855E-01 | 102.245  | 0.007  | 9.811E-01 | 9.920E-01 |
| ENSG00000114739 | ACVR2B   | 151.041  | -0.613 | 3.969E-02 | 1.860E-01 | 95.446   | -0.061 | 8.476E-01 | 9.419E-01 |
| ENSG00000066135 | KDM4A    | 120.897  | -0.741 | 3.974E-02 | 1.861E-01 | 225.290  | -0.398 | 1.023E-01 | 3.584E-01 |
| ENSG00000144451 | SPAG16   | 222.786  | -0.543 | 3.995E-02 | 1.870E-01 | 312.643  | 0.140  | 5.723E-01 | 8.061E-01 |
| ENSG00000126522 | ASL      | 30.115   | -1.014 | 3.997E-02 | 1.870E-01 | 30.220   | -0.173 | 6.699E-01 | 8.578E-01 |
| ENSG00000107669 | ATE1     | 188.248  | -0.572 | 4.034E-02 | 1.879E-01 | 209.438  | -0.066 | 7.970E-01 | 9.188E-01 |
| ENSG00000138286 | FAM149B1 | 44.268   | -0.893 | 4.047E-02 | 1.884E-01 | 42.194   | -0.148 | 7.024E-01 | 8.743E-01 |
| ENSG00000139438 | FAM222A  | 50.093   | -0.934 | 4.052E-02 | 1.885E-01 | 67.629   | 0.317  | 3.509E-01 | 6.569E-01 |
| ENSG00000248527 | MTATP6P1 | 4094.505 | 0.428  | 4.067E-02 | 1.889E-01 | 3337.800 | 0.940  | 7.348E-07 | 9.188E-05 |
| ENSG00000164087 | POC1A    | 390.979  | -0.536 | 4.097E-02 | 1.897E-01 | 343.700  | -0.314 | 2.005E-01 | 5.028E-01 |
| ENSG00000122912 | SLC25A16 | 60.055   | -0.836 | 4.100E-02 | 1.897E-01 | 60.263   | 0.030  | 9.306E-01 | 9.750E-01 |
| ENSG00000160447 | PKN3     | 103.050  | -0.855 | 4.112E-02 | 1.901E-01 | 88.312   | -0.414 | 2.371E-01 | 5.436E-01 |
| ENSG00000204130 | RUFY2    | 80.532   | -0.722 | 4.112E-02 | 1.901E-01 | 93.059   | -0.159 | 6.408E-01 | 8.446E-01 |
| ENSG00000144959 | NCEH1    | 86.716   | -0.724 | 4.126E-02 | 1.907E-01 | 50.375   | -0.376 | 2.950E-01 | 6.049E-01 |
| ENSG00000163904 | SENP2    | 144.654  | -0.621 | 4.137E-02 | 1.909E-01 | 139.765  | -0.253 | 3.721E-01 | 6.755E-01 |
| ENSG00000136897 | MRPL50   | 331.241  | -0.563 | 4.150E-02 | 1.911E-01 | 272.201  | -0.097 | 6.740E-01 | 8.595E-01 |
| ENSG00000180938 | ZNF572   | 51.682   | -0.832 | 4.152E-02 | 1.911E-01 | 29.141   | -0.433 | 2.862E-01 | 5.975E-01 |
| ENSG00000101447 | FAM83D   | 443.795  | -0.574 | 4.158E-02 | 1.913E-01 | 379.337  | 0.166  | 4.172E-01 | 7.083E-01 |

|                 |            |          |        |           |           |          |        |           |           |
|-----------------|------------|----------|--------|-----------|-----------|----------|--------|-----------|-----------|
| ENSG00000144647 | POMGNT2    | 191.457  | -0.558 | 4.174E-02 | 1.917E-01 | 167.995  | 0.315  | 2.454E-01 | 5.537E-01 |
| ENSG00000182022 | CHST15     | 62.194   | -0.867 | 4.203E-02 | 1.923E-01 | 44.248   | -0.473 | 2.492E-01 | 5.582E-01 |
| ENSG00000162174 | ASRGL1     | 970.931  | -0.629 | 4.205E-02 | 1.924E-01 | 747.850  | -0.274 | 1.571E-01 | 4.473E-01 |
| ENSG00000169925 | BRD3       | 725.221  | -0.505 | 4.220E-02 | 1.928E-01 | 890.919  | -0.349 | 8.842E-02 | 3.299E-01 |
| ENSG00000180178 | FAR2P1     | 30.115   | -0.941 | 4.248E-02 | 1.938E-01 | 41.766   | -0.122 | 7.572E-01 | 9.007E-01 |
| ENSG00000089048 | ESF1       | 2028.125 | 0.448  | 4.276E-02 | 1.946E-01 | 1760.922 | 0.547  | 4.372E-03 | 5.889E-02 |
| ENSG00000107815 | TWNK       | 172.917  | -0.621 | 4.288E-02 | 1.949E-01 | 163.879  | -0.250 | 3.759E-01 | 6.772E-01 |
| ENSG00000125249 | RAP2A      | 190.463  | -0.785 | 4.305E-02 | 1.955E-01 | 156.414  | 0.059  | 8.472E-01 | 9.416E-01 |
| ENSG00000138777 | PPA2       | 111.150  | -0.686 | 4.318E-02 | 1.958E-01 | 110.068  | -0.333 | 2.560E-01 | 5.663E-01 |
| ENSG00000198814 | GK         | 46.450   | -0.880 | 4.335E-02 | 1.961E-01 | 15.161   | -0.024 | 9.522E-01 | NA        |
| ENSG00000230551 | AC021078.1 | 52.302   | -0.907 | 4.337E-02 | 1.961E-01 | 72.900   | -0.003 | 9.921E-01 | 9.967E-01 |
| ENSG00000165389 | SPTSSA     | 543.389  | -0.602 | 4.381E-02 | 1.973E-01 | 478.381  | -0.079 | 7.385E-01 | 8.914E-01 |
| ENSG00000130202 | NECTIN2    | 247.502  | -0.629 | 4.414E-02 | 1.980E-01 | 201.756  | -0.381 | 2.162E-01 | 5.213E-01 |
| ENSG00000100485 | SOS2       | 83.446   | -0.705 | 4.418E-02 | 1.981E-01 | 74.529   | 0.346  | 2.970E-01 | 6.071E-01 |
| ENSG00000163626 | COX18      | 94.854   | -0.778 | 4.437E-02 | 1.986E-01 | 90.015   | 0.106  | 7.589E-01 | 9.012E-01 |
| ENSG00000075790 | BCAP29     | 192.154  | -0.591 | 4.448E-02 | 1.989E-01 | 191.687  | -0.305 | 2.320E-01 | 5.375E-01 |
| ENSG00000259959 | AC107068.1 | 30.246   | -1.034 | 4.490E-02 | 2.002E-01 | 25.940   | -0.092 | 8.265E-01 | 9.312E-01 |
| ENSG00000095787 | WAC        | 1379.584 | 0.383  | 4.509E-02 | 2.007E-01 | 1431.072 | 0.531  | 2.105E-03 | 3.582E-02 |
| ENSG00000134698 | AGO4       | 39.019   | -0.943 | 4.533E-02 | 2.015E-01 | 53.447   | 0.215  | 5.611E-01 | 7.995E-01 |
| ENSG00000187688 | TRPV2      | 30.183   | -0.956 | 4.553E-02 | 2.022E-01 | 21.543   | -0.469 | 2.584E-01 | NA        |
| ENSG00000086015 | MAST2      | 139.783  | -0.617 | 4.566E-02 | 2.026E-01 | 187.542  | -0.197 | 4.336E-01 | 7.186E-01 |
| ENSG00000122966 | CIT        | 80.196   | -0.816 | 4.574E-02 | 2.027E-01 | 94.666   | -0.243 | 4.773E-01 | 7.494E-01 |
| ENSG00000138796 | HADH       | 291.658  | -0.603 | 4.585E-02 | 2.030E-01 | 251.082  | -0.200 | 4.454E-01 | 7.253E-01 |
| ENSG00000074201 | CLNS1A     | 759.644  | -0.540 | 4.592E-02 | 2.031E-01 | 870.539  | -0.038 | 8.328E-01 | 9.345E-01 |
| ENSG00000135677 | GNS        | 202.373  | -0.547 | 4.596E-02 | 2.033E-01 | 228.947  | -0.493 | 5.178E-02 | 2.484E-01 |
| ENSG00000117528 | ABCD3      | 632.777  | -0.502 | 4.618E-02 | 2.039E-01 | 519.969  | -0.214 | 3.794E-01 | 6.799E-01 |

|                 |           |         |        |           |           |         |        |           |           |
|-----------------|-----------|---------|--------|-----------|-----------|---------|--------|-----------|-----------|
| ENSG00000132004 | FBXW9     | 49.825  | -0.810 | 4.623E-02 | 2.040E-01 | 110.767 | -0.237 | 4.549E-01 | 7.339E-01 |
| ENSG00000100304 | TTLL12    | 115.200 | -0.671 | 4.660E-02 | 2.050E-01 | 71.306  | 0.072  | 8.334E-01 | 9.345E-01 |
| ENSG00000042088 | TDP1      | 121.945 | -0.661 | 4.660E-02 | 2.050E-01 | 101.131 | -0.187 | 5.487E-01 | 7.916E-01 |
| ENSG00000168175 | MAPK1IP1L | 308.036 | -0.550 | 4.662E-02 | 2.050E-01 | 291.816 | -0.233 | 3.426E-01 | 6.491E-01 |
| ENSG00000109466 | KLHL2     | 44.964  | -0.876 | 4.675E-02 | 2.051E-01 | 27.568  | 0.025  | 9.515E-01 | 9.821E-01 |
| ENSG00000107186 | MPDZ      | 112.237 | -0.721 | 4.675E-02 | 2.051E-01 | 105.106 | -0.124 | 6.835E-01 | 8.644E-01 |
| ENSG00000163006 | CCDC138   | 63.040  | -0.771 | 4.689E-02 | 2.055E-01 | 48.317  | 0.073  | 8.548E-01 | 9.447E-01 |
| ENSG00000149483 | TMEM138   | 174.487 | -0.570 | 4.738E-02 | 2.073E-01 | 144.994 | -0.162 | 5.955E-01 | 8.195E-01 |
| ENSG00000132846 | ZBED3     | 162.884 | -0.623 | 4.758E-02 | 2.081E-01 | 146.107 | -0.214 | 4.428E-01 | 7.231E-01 |
| ENSG00000089063 | TMEM230   | 469.064 | -0.693 | 4.829E-02 | 2.102E-01 | 543.940 | 0.065  | 7.413E-01 | 8.925E-01 |
| ENSG00000136848 | DAB2IP    | 154.297 | -0.666 | 4.851E-02 | 2.102E-01 | 146.635 | -0.280 | 3.495E-01 | 6.555E-01 |
| ENSG00000272047 | GTF2H5    | 631.688 | -0.608 | 4.864E-02 | 2.106E-01 | 619.188 | -0.069 | 7.453E-01 | 8.939E-01 |
| ENSG00000157426 | AASDH     | 79.773  | -0.817 | 4.875E-02 | 2.109E-01 | 60.808  | -0.348 | 3.450E-01 | 6.514E-01 |
| ENSG00000007968 | E2F2      | 42.137  | -0.890 | 4.925E-02 | 2.127E-01 | 49.943  | -0.122 | 7.394E-01 | 8.920E-01 |
| ENSG00000117054 | ACADM     | 251.138 | -0.588 | 4.941E-02 | 2.130E-01 | 348.211 | -0.416 | 6.121E-02 | 2.725E-01 |
| ENSG00000275052 | PPP4R3B   | 295.434 | -0.508 | 4.945E-02 | 2.130E-01 | 335.841 | -0.068 | 8.037E-01 | 9.218E-01 |
| ENSG00000197128 | ZNF772    | 70.485  | -0.773 | 4.993E-02 | 2.143E-01 | 57.930  | -0.324 | 3.690E-01 | 6.728E-01 |
| ENSG00000122483 | CCDC18    | 151.996 | -0.627 | 4.987E-02 | 2.143E-01 | 141.719 | -0.089 | 7.586E-01 | 9.010E-01 |
| ENSG00000166130 | IKBIP     | 233.414 | -0.512 | 4.990E-02 | 2.143E-01 | 234.042 | -0.071 | 8.101E-01 | 9.241E-01 |
| ENSG00000148935 | GAS2      | 72.993  | -0.835 | 5.007E-02 | 2.145E-01 | 72.508  | -0.155 | 6.377E-01 | 8.430E-01 |
| ENSG00000161395 | PGAP3     | 44.169  | -0.824 | 5.031E-02 | 2.152E-01 | 38.770  | -0.479 | 2.438E-01 | 5.521E-01 |
| ENSG00000146281 | PM20D2    | 148.845 | -0.627 | 5.059E-02 | 2.160E-01 | 156.104 | -0.088 | 7.546E-01 | 8.996E-01 |
| ENSG00000204623 | ZNRD1ASP  | 44.800  | -0.831 | 5.080E-02 | 2.166E-01 | 55.138  | -0.198 | 6.051E-01 | 8.257E-01 |
| ENSG00000131375 | CAPN7     | 138.846 | -0.622 | 5.099E-02 | 2.170E-01 | 188.109 | -0.006 | 9.824E-01 | 9.925E-01 |
| ENSG00000010072 | SPRTN     | 60.876  | -0.834 | 5.104E-02 | 2.171E-01 | 71.909  | 0.042  | 9.028E-01 | 9.639E-01 |
| ENSG00000100031 | GGT1      | 32.407  | -0.934 | 5.133E-02 | 2.179E-01 | 30.159  | -0.032 | 9.393E-01 | 9.777E-01 |

|                 |            |         |        |           |           |         |        |           |           |
|-----------------|------------|---------|--------|-----------|-----------|---------|--------|-----------|-----------|
| ENSG00000172936 | MYD88      | 116.903 | -0.812 | 5.135E-02 | 2.179E-01 | 60.181  | -0.040 | 9.092E-01 | 9.671E-01 |
| ENSG00000146729 | NIPSNAP2   | 145.021 | -0.623 | 5.194E-02 | 2.194E-01 | 242.062 | -0.379 | 1.488E-01 | 4.364E-01 |
| ENSG00000188206 | HNRNPU-AS1 | 64.714  | -0.742 | 5.230E-02 | 2.203E-01 | 65.624  | -0.448 | 1.844E-01 | 4.832E-01 |
| ENSG00000124920 | MYRF       | 185.935 | -0.617 | 5.237E-02 | 2.203E-01 | 148.255 | 0.085  | 8.351E-01 | 9.350E-01 |
| ENSG00000162441 | LZIC       | 307.609 | -0.503 | 5.232E-02 | 2.203E-01 | 291.288 | -0.139 | 5.820E-01 | 8.119E-01 |
| ENSG00000119401 | TRIM32     | 45.740  | -0.847 | 5.259E-02 | 2.205E-01 | 60.366  | -0.103 | 7.885E-01 | 9.151E-01 |
| ENSG00000171469 | ZNF561     | 60.142  | -0.793 | 5.269E-02 | 2.208E-01 | 69.356  | -0.270 | 4.493E-01 | 7.280E-01 |
| ENSG00000165898 | ISCA2      | 214.789 | -0.691 | 5.277E-02 | 2.208E-01 | 178.471 | -0.015 | 9.557E-01 | 9.838E-01 |
| ENSG00000177485 | ZBTB33     | 196.782 | -0.560 | 5.276E-02 | 2.208E-01 | 191.770 | -0.065 | 8.034E-01 | 9.216E-01 |
| ENSG00000184465 | WDR27      | 90.927  | -0.714 | 5.301E-02 | 2.210E-01 | 137.584 | 0.025  | 9.320E-01 | 9.753E-01 |
| ENSG00000065328 | MCM10      | 310.083 | -0.507 | 5.298E-02 | 2.210E-01 | 303.202 | 0.187  | 4.817E-01 | 7.517E-01 |
| ENSG00000151247 | EIF4E      | 434.267 | 0.441  | 5.291E-02 | 2.210E-01 | 334.894 | 0.750  | 5.007E-03 | 6.384E-02 |
| ENSG00000168291 | PDHB       | 294.457 | -0.568 | 5.331E-02 | 2.219E-01 | 215.632 | 0.152  | 5.531E-01 | 7.942E-01 |
| ENSG00000068784 | SRBD1      | 163.726 | -0.583 | 5.339E-02 | 2.221E-01 | 192.610 | 0.003  | 9.899E-01 | 9.961E-01 |
| ENSG00000157985 | AGAP1      | 220.305 | -0.583 | 5.344E-02 | 2.223E-01 | 282.852 | 0.270  | 2.290E-01 | 5.343E-01 |
| ENSG00000037757 | MRI1       | 112.448 | -0.598 | 5.355E-02 | 2.226E-01 | 104.816 | -0.056 | 8.667E-01 | 9.495E-01 |
| ENSG00000015532 | XYLT2      | 130.647 | -0.592 | 5.376E-02 | 2.230E-01 | 66.791  | -0.477 | 1.510E-01 | 4.384E-01 |
| ENSG00000182749 | PAQR7      | 82.378  | -0.754 | 5.398E-02 | 2.236E-01 | 82.772  | 0.339  | 3.836E-01 | 6.829E-01 |
| ENSG00000112159 | MDN1       | 659.912 | -0.514 | 5.420E-02 | 2.240E-01 | 566.695 | -0.005 | 9.791E-01 | 9.914E-01 |
| ENSG00000071073 | MGAT4A     | 302.930 | -0.510 | 5.420E-02 | 2.240E-01 | 204.870 | -0.296 | 2.723E-01 | 5.824E-01 |
| ENSG00000117133 | RPF1       | 463.581 | 0.447  | 5.419E-02 | 2.240E-01 | 371.309 | 0.557  | 1.372E-02 | 1.177E-01 |
| ENSG00000135686 | KLHL36     | 227.385 | -0.541 | 5.426E-02 | 2.242E-01 | 257.652 | -0.296 | 2.221E-01 | 5.272E-01 |
| ENSG00000096092 | TMEM14A    | 131.726 | -0.635 | 5.471E-02 | 2.256E-01 | 345.553 | -0.104 | 6.316E-01 | 8.402E-01 |
| ENSG00000080815 | PSEN1      | 162.210 | -0.580 | 5.501E-02 | 2.265E-01 | 199.060 | -0.165 | 5.033E-01 | 7.636E-01 |
| ENSG00000124615 | MOCS1      | 102.026 | -0.634 | 5.541E-02 | 2.274E-01 | 58.520  | -0.173 | 6.478E-01 | 8.475E-01 |
| ENSG00000269343 | ZNF587B    | 74.666  | -0.706 | 5.554E-02 | 2.276E-01 | 58.619  | -0.165 | 6.423E-01 | 8.449E-01 |



|                 |            |          |        |           |           |          |        |           |           |
|-----------------|------------|----------|--------|-----------|-----------|----------|--------|-----------|-----------|
| ENSG00000068650 | ATP11A     | 175.478  | -0.547 | 5.555E-02 | 2.276E-01 | 180.221  | -0.354 | 1.950E-01 | 4.960E-01 |
| ENSG00000111203 | ITFG2      | 70.681   | -0.825 | 5.603E-02 | 2.286E-01 | 66.964   | -0.028 | 9.353E-01 | 9.762E-01 |
| ENSG00000106392 | C1GALT1    | 299.665  | -0.524 | 5.594E-02 | 2.286E-01 | 297.705  | -0.300 | 2.278E-01 | 5.330E-01 |
| ENSG00000114942 | EEF1B2     | 4828.945 | 0.380  | 5.598E-02 | 2.286E-01 | 3394.411 | 0.507  | 2.481E-03 | 3.980E-02 |
| ENSG00000121058 | COIL       | 482.991  | 0.479  | 5.605E-02 | 2.286E-01 | 396.092  | 0.600  | 1.233E-02 | 1.106E-01 |
| ENSG00000138346 | DNA2       | 40.981   | -0.842 | 5.621E-02 | 2.288E-01 | 33.157   | -0.165 | 6.937E-01 | 8.687E-01 |
| ENSG00000126767 | ELK1       | 96.170   | -0.734 | 5.617E-02 | 2.288E-01 | 80.929   | 0.226  | 4.762E-01 | 7.490E-01 |
| ENSG00000176974 | SHMT1      | 176.923  | -0.695 | 5.645E-02 | 2.295E-01 | 145.094  | 0.094  | 7.290E-01 | 8.880E-01 |
| ENSG00000088035 | ALG6       | 35.830   | -0.883 | 5.663E-02 | 2.301E-01 | 38.229   | 0.154  | 7.022E-01 | 8.743E-01 |
| ENSG00000156239 | N6AMT1     | 44.674   | -0.833 | 5.678E-02 | 2.305E-01 | 54.877   | -0.240 | 4.951E-01 | 7.577E-01 |
| ENSG00000117308 | GALE       | 214.531  | -0.520 | 5.704E-02 | 2.312E-01 | 214.559  | -0.064 | 7.997E-01 | 9.193E-01 |
| ENSG00000007923 | DNAJC11    | 197.951  | -0.549 | 5.723E-02 | 2.317E-01 | 142.369  | -0.317 | 2.753E-01 | 5.857E-01 |
| ENSG00000149196 | HIKESHI    | 197.740  | -0.647 | 5.748E-02 | 2.322E-01 | 205.506  | 0.115  | 6.923E-01 | 8.684E-01 |
| ENSG00000182095 | TNRC18     | 82.640   | -0.673 | 5.755E-02 | 2.323E-01 | 67.058   | -0.223 | 5.496E-01 | 7.918E-01 |
| ENSG00000078902 | TOLLIP     | 703.443  | 0.461  | 5.762E-02 | 2.325E-01 | 590.890  | 0.516  | 3.273E-02 | 1.932E-01 |
| ENSG00000092201 | SUPT16H    | 2420.890 | -0.505 | 5.774E-02 | 2.328E-01 | 2113.182 | -0.429 | 2.495E-02 | 1.668E-01 |
| ENSG00000205476 | CCDC85C    | 287.829  | -0.526 | 5.791E-02 | 2.333E-01 | 183.709  | -0.294 | 2.471E-01 | 5.552E-01 |
| ENSG00000169105 | CHST14     | 77.412   | -0.764 | 5.813E-02 | 2.338E-01 | 68.229   | -0.124 | 7.390E-01 | 8.916E-01 |
| ENSG00000185219 | ZNF445     | 150.724  | -0.541 | 5.834E-02 | 2.342E-01 | 144.674  | -0.471 | 1.259E-01 | 4.004E-01 |
| ENSG00000263731 | AC145207.5 | 46.724   | -0.880 | 5.853E-02 | 2.345E-01 | 26.736   | -0.142 | 7.271E-01 | 8.866E-01 |
| ENSG00000142188 | TMEM50B    | 113.954  | -0.605 | 5.854E-02 | 2.345E-01 | 160.059  | -0.148 | 5.664E-01 | 8.023E-01 |
| ENSG00000139865 | TTC6       | 31.494   | -0.880 | 5.897E-02 | 2.357E-01 | 39.098   | -0.453 | 2.518E-01 | 5.609E-01 |
| ENSG00000099290 | WASHC2A    | 91.855   | -0.641 | 5.932E-02 | 2.365E-01 | 97.645   | -0.418 | 2.091E-01 | 5.121E-01 |
| ENSG00000143157 | POGK       | 59.604   | -0.758 | 5.935E-02 | 2.365E-01 | 104.986  | -0.431 | 1.412E-01 | 4.250E-01 |
| ENSG00000171097 | KYAT1      | 59.950   | -0.742 | 5.936E-02 | 2.365E-01 | 52.856   | -0.271 | 4.594E-01 | 7.377E-01 |
| ENSG00000164403 | SHROOM1    | 233.877  | -0.545 | 5.938E-02 | 2.365E-01 | 185.291  | -0.150 | 6.107E-01 | 8.288E-01 |

|                 |          |          |        |           |           |          |        |           |           |
|-----------------|----------|----------|--------|-----------|-----------|----------|--------|-----------|-----------|
| ENSG00000213066 | FGFR1OP  | 215.395  | -0.562 | 5.963E-02 | 2.370E-01 | 210.901  | 0.370  | 1.707E-01 | 4.656E-01 |
| ENSG00000160221 | C21orf33 | 32.913   | -0.933 | 5.972E-02 | 2.373E-01 | 26.094   | -0.580 | 1.539E-01 | 4.423E-01 |
| ENSG00000180098 | TRNAU1AP | 77.766   | -0.767 | 5.993E-02 | 2.377E-01 | 89.480   | -0.361 | 2.547E-01 | 5.650E-01 |
| ENSG00000141034 | GID4     | 71.420   | -0.691 | 6.020E-02 | 2.382E-01 | 31.093   | 0.258  | 5.323E-01 | 7.843E-01 |
| ENSG00000106080 | FKBP14   | 167.802  | -0.594 | 6.070E-02 | 2.394E-01 | 151.061  | -0.174 | 5.450E-01 | 7.902E-01 |
| ENSG00000104765 | BNIP3L   | 156.319  | -0.584 | 6.077E-02 | 2.396E-01 | 122.637  | -0.009 | 9.759E-01 | 9.909E-01 |
| ENSG00000145439 | CBR4     | 222.057  | -0.509 | 6.101E-02 | 2.404E-01 | 182.448  | 0.114  | 6.642E-01 | 8.548E-01 |
| ENSG00000165424 | ZCCHC24  | 51.073   | -0.816 | 6.114E-02 | 2.408E-01 | 37.393   | -0.309 | 4.485E-01 | 7.276E-01 |
| ENSG00000179889 | PDXDC1   | 692.246  | -0.561 | 6.201E-02 | 2.430E-01 | 610.650  | 0.278  | 2.556E-01 | 5.661E-01 |
| ENSG00000155592 | ZKSCAN2  | 84.386   | -0.697 | 6.217E-02 | 2.432E-01 | 55.192   | -0.136 | 7.187E-01 | 8.828E-01 |
| ENSG00000146463 | ZMYM4    | 211.408  | -0.529 | 6.320E-02 | 2.460E-01 | 243.729  | -0.399 | 1.309E-01 | 4.084E-01 |
| ENSG00000075539 | FRYL     | 92.292   | -0.633 | 6.326E-02 | 2.461E-01 | 135.461  | -0.323 | 2.580E-01 | 5.685E-01 |
| ENSG00000124160 | NCOA5    | 160.368  | -0.626 | 6.366E-02 | 2.471E-01 | 136.879  | -0.109 | 7.506E-01 | 8.968E-01 |
| ENSG00000150527 | CTAGE5   | 468.246  | 0.474  | 6.398E-02 | 2.479E-01 | 431.628  | 0.669  | 1.234E-02 | 1.106E-01 |
| ENSG00000167283 | ATP5MG   | 7099.291 | 0.378  | 6.448E-02 | 2.493E-01 | 5580.421 | 0.547  | 1.033E-03 | 2.317E-02 |
| ENSG00000009724 | MASP2    | 32.018   | -0.904 | 6.455E-02 | 2.494E-01 | 44.818   | -0.489 | 2.436E-01 | 5.521E-01 |
| ENSG00000120158 | RCL1     | 487.459  | 0.467  | 6.460E-02 | 2.495E-01 | 409.164  | 0.771  | 6.036E-04 | 1.584E-02 |
| ENSG00000168461 | RAB31    | 151.347  | -0.544 | 6.479E-02 | 2.498E-01 | 154.031  | -0.438 | 1.382E-01 | 4.200E-01 |
| ENSG00000064787 | BCAS1    | 192.884  | -0.535 | 6.479E-02 | 2.498E-01 | 230.978  | -0.465 | 4.771E-02 | 2.375E-01 |
| ENSG00000166813 | KIF7     | 88.682   | -0.754 | 6.641E-02 | 2.546E-01 | 78.153   | 0.167  | 5.999E-01 | 8.219E-01 |
| ENSG00000062725 | APPBP2   | 152.690  | -0.672 | 6.648E-02 | 2.547E-01 | 209.086  | -0.253 | 3.595E-01 | 6.649E-01 |
| ENSG00000180953 | ST20     | 32.866   | -0.908 | 6.688E-02 | 2.556E-01 | 32.939   | 0.607  | 1.228E-01 | 3.936E-01 |
| ENSG00000169188 | APEX2    | 126.691  | -0.583 | 6.745E-02 | 2.569E-01 | 144.893  | -0.320 | 2.696E-01 | 5.793E-01 |
| ENSG00000115255 | REEP6    | 88.326   | -0.830 | 6.807E-02 | 2.583E-01 | 63.710   | -0.472 | 2.328E-01 | 5.380E-01 |
| ENSG00000155008 | APOOL    | 120.790  | -0.620 | 6.808E-02 | 2.583E-01 | 130.584  | -0.422 | 1.595E-01 | 4.503E-01 |
| ENSG00000163684 | RPP14    | 90.012   | -0.673 | 6.879E-02 | 2.601E-01 | 95.866   | -0.131 | 6.688E-01 | 8.574E-01 |

|                 |          |          |        |           |           |          |        |           |           |
|-----------------|----------|----------|--------|-----------|-----------|----------|--------|-----------|-----------|
| ENSG00000138744 | NAAA     | 101.844  | -0.663 | 6.911E-02 | 2.610E-01 | 84.016   | 0.062  | 8.443E-01 | 9.400E-01 |
| ENSG00000164967 | RPP25L   | 86.603   | -0.657 | 6.914E-02 | 2.610E-01 | 98.359   | -0.185 | 5.651E-01 | 8.014E-01 |
| ENSG00000070476 | ZXDC     | 101.531  | -0.611 | 6.945E-02 | 2.617E-01 | 97.900   | -0.084 | 7.829E-01 | 9.120E-01 |
| ENSG00000256771 | ZNF253   | 37.047   | -0.937 | 6.993E-02 | 2.627E-01 | 17.303   | -0.990 | 1.830E-02 | NA        |
| ENSG00000119689 | DLST     | 29.827   | 0.894  | 7.048E-02 | 2.640E-01 | 30.795   | 1.017  | 1.255E-02 | 1.123E-01 |
| ENSG00000156958 | GALK2    | 64.390   | -0.761 | 7.056E-02 | 2.640E-01 | 46.969   | -0.150 | 6.901E-01 | 8.680E-01 |
| ENSG00000147180 | ZNF711   | 16.163   | 0.962  | 7.086E-02 | 2.649E-01 | 37.174   | 0.768  | 4.966E-02 | 2.421E-01 |
| ENSG00000101187 | SLCO4A1  | 144.230  | -0.573 | 7.125E-02 | 2.658E-01 | 81.647   | -0.184 | 6.440E-01 | 8.457E-01 |
| ENSG00000057252 | SOAT1    | 155.286  | -0.628 | 7.135E-02 | 2.659E-01 | 118.226  | -0.239 | 3.931E-01 | 6.917E-01 |
| ENSG00000160124 | CCDC58   | 247.114  | -0.528 | 7.135E-02 | 2.659E-01 | 226.878  | 0.335  | 2.225E-01 | 5.276E-01 |
| ENSG00000125503 | PPP1R12C | 131.280  | -0.553 | 7.185E-02 | 2.672E-01 | 139.741  | -0.171 | 6.003E-01 | 8.220E-01 |
| ENSG00000043093 | DCUN1D1  | 59.637   | -0.762 | 7.228E-02 | 2.680E-01 | 75.904   | -0.212 | 5.043E-01 | 7.642E-01 |
| ENSG00000116171 | SCP2     | 222.885  | -0.529 | 7.270E-02 | 2.692E-01 | 263.572  | -0.182 | 4.486E-01 | 7.276E-01 |
| ENSG00000125247 | TMTC4    | 103.796  | -0.610 | 7.316E-02 | 2.703E-01 | 165.630  | -0.250 | 3.234E-01 | 6.311E-01 |
| ENSG00000145703 | IQGAP2   | 703.171  | -0.532 | 7.345E-02 | 2.710E-01 | 743.693  | -0.390 | 5.195E-02 | 2.487E-01 |
| ENSG00000131469 | RPL27    | 7974.476 | 0.382  | 7.390E-02 | 2.718E-01 | 5420.429 | 0.555  | 1.961E-02 | 1.472E-01 |
| ENSG00000126705 | AHDC1    | 99.141   | -0.759 | 7.403E-02 | 2.722E-01 | 88.751   | -0.330 | 2.948E-01 | 6.049E-01 |
| ENSG00000023516 | AKAP11   | 68.220   | -0.690 | 7.407E-02 | 2.722E-01 | 116.496  | -0.386 | 1.973E-01 | 4.986E-01 |
| ENSG00000176444 | CLK2     | 110.525  | -0.599 | 7.415E-02 | 2.725E-01 | 124.874  | -0.237 | 4.302E-01 | 7.167E-01 |
| ENSG00000221829 | FANCG    | 182.275  | -0.520 | 7.425E-02 | 2.726E-01 | 154.020  | -0.203 | 4.481E-01 | 7.274E-01 |
| ENSG00000138385 | SSB      | 2412.690 | 0.370  | 7.454E-02 | 2.731E-01 | 1985.321 | 0.526  | 7.726E-03 | 8.275E-02 |
| ENSG00000173706 | HEG1     | 146.590  | -0.562 | 7.511E-02 | 2.745E-01 | 181.152  | -0.265 | 3.042E-01 | 6.153E-01 |
| ENSG00000143921 | ABCG8    | 54.521   | -0.815 | 7.554E-02 | 2.757E-01 | 37.328   | -0.492 | 2.147E-01 | 5.190E-01 |
| ENSG00000131981 | LGALS3   | 117.562  | -0.684 | 7.587E-02 | 2.764E-01 | 71.046   | 0.583  | 8.165E-02 | 3.159E-01 |
| ENSG00000197256 | KANK2    | 125.177  | -0.564 | 7.661E-02 | 2.784E-01 | 125.324  | -0.013 | 9.630E-01 | 9.847E-01 |
| ENSG00000205659 | LIN52    | 126.700  | -0.563 | 7.679E-02 | 2.789E-01 | 173.426  | 0.088  | 7.326E-01 | 8.888E-01 |

|                 |            |          |        |           |           |          |        |           |           |
|-----------------|------------|----------|--------|-----------|-----------|----------|--------|-----------|-----------|
| ENSG00000247400 | DNAJC3-AS1 | 79.691   | -0.639 | 7.682E-02 | 2.790E-01 | 80.588   | -0.487 | 1.960E-01 | 4.974E-01 |
| ENSG00000114978 | MOB1A      | 236.919  | -0.580 | 7.749E-02 | 2.804E-01 | 210.580  | -0.026 | 9.160E-01 | 9.692E-01 |
| ENSG00000168386 | FILIP1L    | 155.696  | -0.559 | 7.837E-02 | 2.819E-01 | 217.165  | -0.374 | 1.610E-01 | 4.515E-01 |
| ENSG00000108506 | INTS2      | 68.688   | -0.654 | 7.897E-02 | 2.835E-01 | 70.816   | -0.154 | 6.744E-01 | 8.600E-01 |
| ENSG00000250799 | PRODH2     | 43.835   | -0.793 | 7.921E-02 | 2.837E-01 | 44.969   | -0.406 | 2.977E-01 | 6.079E-01 |
| ENSG00000103855 | CD276      | 239.746  | -0.525 | 7.925E-02 | 2.837E-01 | 237.928  | 0.093  | 7.347E-01 | 8.899E-01 |
| ENSG00000186185 | KIF18B     | 107.874  | -0.715 | 7.935E-02 | 2.839E-01 | 56.199   | 0.297  | 4.604E-01 | 7.386E-01 |
| ENSG00000070366 | SMG6       | 117.836  | -0.599 | 7.960E-02 | 2.846E-01 | 176.399  | -0.242 | 3.891E-01 | 6.879E-01 |
| ENSG00000189007 | ADAT2      | 204.438  | -0.511 | 7.971E-02 | 2.847E-01 | 221.093  | 0.143  | 6.337E-01 | 8.411E-01 |
| ENSG00000171960 | PPIH       | 479.957  | 0.455  | 8.064E-02 | 2.867E-01 | 394.820  | 0.630  | 4.111E-03 | 5.648E-02 |
| ENSG00000069966 | GNB5       | 62.388   | -0.743 | 8.071E-02 | 2.869E-01 | 90.828   | -0.278 | 3.822E-01 | 6.824E-01 |
| ENSG00000130702 | LAMA5      | 443.144  | -0.545 | 8.090E-02 | 2.870E-01 | 474.096  | -0.390 | 6.815E-02 | 2.858E-01 |
| ENSG00000143156 | NME7       | 37.176   | -0.834 | 8.116E-02 | 2.873E-01 | 49.492   | -0.316 | 4.008E-01 | 6.979E-01 |
| ENSG00000137414 | FAM8A1     | 167.688  | -0.594 | 8.116E-02 | 2.873E-01 | 207.318  | -0.259 | 2.816E-01 | 5.925E-01 |
| ENSG00000145362 | ANK2       | 48.750   | -0.793 | 8.125E-02 | 2.875E-01 | 46.848   | -0.464 | 2.604E-01 | 5.702E-01 |
| ENSG00000058673 | ZC3H11A    | 172.134  | -0.523 | 8.172E-02 | 2.886E-01 | 203.026  | -0.250 | 3.057E-01 | 6.156E-01 |
| ENSG00000158636 | EMSY       | 69.617   | -0.646 | 8.197E-02 | 2.890E-01 | 74.881   | -0.067 | 8.374E-01 | 9.360E-01 |
| ENSG00000096872 | IFT74      | 57.852   | -0.717 | 8.239E-02 | 2.898E-01 | 114.718  | 0.013  | 9.636E-01 | 9.849E-01 |
| ENSG00000128191 | DGCR8      | 117.661  | -0.655 | 8.304E-02 | 2.913E-01 | 124.058  | -0.127 | 6.908E-01 | 8.681E-01 |
| ENSG00000008283 | CYB561     | 38.992   | -0.812 | 8.331E-02 | 2.917E-01 | 28.461   | -0.495 | 2.226E-01 | 5.276E-01 |
| ENSG00000172292 | CERS6      | 282.503  | -0.521 | 8.379E-02 | 2.928E-01 | 282.501  | -0.243 | 3.184E-01 | 6.282E-01 |
| ENSG00000103037 | SETD6      | 158.763  | -0.575 | 8.390E-02 | 2.929E-01 | 165.022  | 0.028  | 9.171E-01 | 9.692E-01 |
| ENSG00000079387 | SENP1      | 161.736  | -0.583 | 8.416E-02 | 2.936E-01 | 145.675  | -0.466 | 1.028E-01 | 3.592E-01 |
| ENSG00000137996 | RTCA       | 216.206  | 0.472  | 8.462E-02 | 2.949E-01 | 220.776  | 0.719  | 6.636E-03 | 7.522E-02 |
| ENSG00000069943 | PIGB       | 47.034   | -0.785 | 8.517E-02 | 2.960E-01 | 38.884   | 0.001  | 9.988E-01 | 9.997E-01 |
| ENSG00000117724 | CENPF      | 1457.618 | -0.537 | 8.519E-02 | 2.960E-01 | 2255.375 | -0.308 | 8.203E-02 | 3.165E-01 |

|                 |          |           |        |           |           |           |        |           |           |
|-----------------|----------|-----------|--------|-----------|-----------|-----------|--------|-----------|-----------|
| ENSG00000198888 | MT-ND1   | 38191.147 | 0.342  | 8.532E-02 | 2.962E-01 | 28784.811 | 0.589  | 1.917E-03 | 3.369E-02 |
| ENSG00000077782 | FGFR1    | 511.836   | -0.509 | 8.552E-02 | 2.966E-01 | 420.438   | -0.009 | 9.686E-01 | 9.871E-01 |
| ENSG00000147471 | PLPBP    | 280.096   | -0.511 | 8.589E-02 | 2.974E-01 | 316.225   | -0.116 | 6.228E-01 | 8.362E-01 |
| ENSG00000134247 | PTGFRN   | 32.181    | -0.788 | 8.600E-02 | 2.976E-01 | 28.375    | -0.095 | 8.190E-01 | 9.271E-01 |
| ENSG00000241127 | YAE1D1   | 54.936    | -0.750 | 8.651E-02 | 2.986E-01 | 55.368    | -0.114 | 7.595E-01 | 9.017E-01 |
| ENSG00000177683 | THAP5    | 89.204    | -0.616 | 8.666E-02 | 2.989E-01 | 70.136    | -0.379 | 2.897E-01 | 6.001E-01 |
| ENSG00000173221 | GLRX     | 147.825   | -0.617 | 8.675E-02 | 2.990E-01 | 93.586    | 0.273  | 3.642E-01 | 6.690E-01 |
| ENSG00000197702 | PARVA    | 119.799   | -0.575 | 8.744E-02 | 3.002E-01 | 139.102   | 0.312  | 2.658E-01 | 5.754E-01 |
| ENSG00000123607 | TTC21B   | 159.662   | -0.508 | 8.767E-02 | 3.007E-01 | 131.987   | 0.028  | 9.218E-01 | 9.712E-01 |
| ENSG00000024862 | CCDC28A  | 178.471   | -0.526 | 8.786E-02 | 3.012E-01 | 126.636   | -0.414 | 1.763E-01 | 4.721E-01 |
| ENSG00000037897 | METTL1   | 232.893   | -0.561 | 8.815E-02 | 3.019E-01 | 211.973   | -0.199 | 4.874E-01 | 7.532E-01 |
| ENSG00000109475 | RPL34    | 10273.175 | 0.408  | 8.820E-02 | 3.019E-01 | 7768.440  | 0.561  | 2.599E-03 | 4.106E-02 |
| ENSG00000125968 | ID1      | 5188.718  | 0.487  | 8.835E-02 | 3.022E-01 | 4104.769  | 0.724  | 1.751E-06 | 1.754E-04 |
| ENSG00000105171 | POP4     | 121.699   | -0.532 | 8.877E-02 | 3.031E-01 | 132.928   | -0.264 | 3.602E-01 | 6.655E-01 |
| ENSG00000166436 | TRIM66   | 49.727    | -0.748 | 8.898E-02 | 3.036E-01 | 46.722    | -0.448 | 2.652E-01 | 5.750E-01 |
| ENSG00000172339 | ALG14    | 54.845    | -0.729 | 8.911E-02 | 3.038E-01 | 58.818    | -0.282 | 4.457E-01 | 7.255E-01 |
| ENSG00000247077 | PGAM5    | 329.418   | 0.470  | 8.918E-02 | 3.039E-01 | 179.285   | 0.556  | 3.726E-02 | 2.074E-01 |
| ENSG00000171017 | LRRC8E   | 122.885   | -0.561 | 8.923E-02 | 3.040E-01 | 107.765   | -0.047 | 8.810E-01 | 9.543E-01 |
| ENSG00000158006 | PAFAH2   | 90.687    | -0.622 | 8.956E-02 | 3.046E-01 | 89.543    | -0.277 | 3.786E-01 | 6.789E-01 |
| ENSG00000185650 | ZFP36L1  | 1713.378  | 0.374  | 8.955E-02 | 3.046E-01 | 1401.290  | 0.722  | 1.350E-04 | 5.614E-03 |
| ENSG00000198732 | SMOC1    | 237.399   | -0.506 | 8.976E-02 | 3.052E-01 | 152.096   | -0.041 | 9.011E-01 | 9.631E-01 |
| ENSG00000153574 | RPIA     | 276.201   | 0.479  | 9.011E-02 | 3.059E-01 | 275.861   | 0.755  | 6.073E-03 | 7.173E-02 |
| ENSG00000279078 | SND1-IT1 | 42.733    | -0.800 | 9.027E-02 | 3.061E-01 | 62.322    | 0.056  | 8.712E-01 | 9.512E-01 |
| ENSG00000188603 | CLN3     | 157.671   | -0.521 | 9.030E-02 | 3.061E-01 | 115.982   | -0.436 | 1.767E-01 | 4.726E-01 |
| ENSG00000089682 | RBM41    | 112.654   | -0.612 | 9.049E-02 | 3.061E-01 | 117.481   | 0.063  | 8.274E-01 | 9.315E-01 |
| ENSG00000116704 | SLC35D1  | 252.929   | -0.510 | 9.068E-02 | 3.065E-01 | 315.734   | -0.051 | 8.136E-01 | 9.249E-01 |

|                 |            |         |        |           |           |         |        |           |           |
|-----------------|------------|---------|--------|-----------|-----------|---------|--------|-----------|-----------|
| ENSG00000106009 | BRAT1      | 102.037 | -0.586 | 9.088E-02 | 3.067E-01 | 97.202  | 0.160  | 6.003E-01 | 8.220E-01 |
| ENSG00000181523 | SGSH       | 50.223  | -0.749 | 9.101E-02 | 3.069E-01 | 44.591  | -0.467 | 2.354E-01 | 5.418E-01 |
| ENSG00000038210 | PI4K2B     | 91.244  | -0.657 | 9.112E-02 | 3.071E-01 | 77.611  | 0.060  | 8.481E-01 | 9.422E-01 |
| ENSG00000197081 | IGF2R      | 677.889 | -0.555 | 9.191E-02 | 3.087E-01 | 685.808 | -0.015 | 9.429E-01 | 9.787E-01 |
| ENSG00000166181 | API5       | 170.506 | -0.504 | 9.207E-02 | 3.091E-01 | 103.226 | -0.208 | 5.242E-01 | 7.782E-01 |
| ENSG00000213390 | ARHGAP19   | 58.259  | -0.691 | 9.227E-02 | 3.093E-01 | 39.563  | -0.321 | 4.010E-01 | 6.979E-01 |
| ENSG00000146477 | SLC22A3    | 87.876  | -0.650 | 9.253E-02 | 3.099E-01 | 63.173  | 0.036  | 9.145E-01 | 9.684E-01 |
| ENSG00000137040 | RANBP6     | 88.602  | -0.628 | 9.297E-02 | 3.107E-01 | 92.672  | -0.007 | 9.833E-01 | 9.929E-01 |
| ENSG00000254004 | ZNF260     | 45.092  | -0.703 | 9.336E-02 | 3.115E-01 | 42.580  | -0.437 | 2.620E-01 | 5.718E-01 |
| ENSG00000276672 | AL161891.1 | 44.949  | -0.821 | 9.343E-02 | 3.116E-01 | 29.713  | -1.072 | 1.067E-02 | 1.011E-01 |
| ENSG00000166529 | ZSCAN21    | 39.263  | -0.782 | 9.359E-02 | 3.121E-01 | 36.456  | 0.241  | 5.527E-01 | 7.942E-01 |
| ENSG00000110400 | NECTIN1    | 104.329 | -0.598 | 9.440E-02 | 3.137E-01 | 63.689  | -0.050 | 8.844E-01 | 9.556E-01 |
| ENSG00000171234 | UGT2B7     | 175.159 | -0.566 | 9.441E-02 | 3.137E-01 | 187.457 | -0.106 | 6.968E-01 | 8.709E-01 |
| ENSG00000056972 | TRAF3IP2   | 50.625  | -0.675 | 9.457E-02 | 3.140E-01 | 57.616  | -0.488 | 1.778E-01 | 4.739E-01 |
| ENSG00000077152 | UBE2T      | 264.424 | -0.587 | 9.503E-02 | 3.152E-01 | 200.627 | 0.548  | 4.072E-02 | 2.185E-01 |
| ENSG00000078804 | TP53INP2   | 83.547  | -0.760 | 9.650E-02 | 3.184E-01 | 58.148  | -0.499 | 2.220E-01 | 5.272E-01 |
| ENSG00000146842 | TMEM209    | 35.040  | -0.745 | 9.670E-02 | 3.187E-01 | 41.120  | -0.448 | 2.407E-01 | 5.481E-01 |
| ENSG00000173153 | ESRRA      | 189.610 | -0.627 | 9.686E-02 | 3.188E-01 | 116.117 | 0.286  | 3.848E-01 | 6.840E-01 |
| ENSG00000205356 | TECPR1     | 63.009  | -0.645 | 9.690E-02 | 3.189E-01 | 53.333  | -0.469 | 2.114E-01 | 5.147E-01 |
| ENSG00000157212 | PAXIP1     | 119.882 | -0.534 | 9.702E-02 | 3.190E-01 | 116.272 | -0.034 | 9.102E-01 | 9.677E-01 |
| ENSG00000173530 | TNFRSF10D  | 202.093 | 0.459  | 9.707E-02 | 3.191E-01 | 168.477 | 0.538  | 4.539E-02 | 2.311E-01 |
| ENSG00000147592 | LACTB2     | 93.439  | -0.592 | 9.737E-02 | 3.197E-01 | 98.910  | -0.284 | 3.644E-01 | 6.691E-01 |
| ENSG00000158863 | FAM160B2   | 79.714  | -0.569 | 9.787E-02 | 3.209E-01 | 98.844  | -0.192 | 5.530E-01 | 7.942E-01 |
| ENSG00000196865 | NHLRC2     | 75.654  | -0.643 | 9.812E-02 | 3.215E-01 | 98.427  | 0.012  | 9.668E-01 | 9.866E-01 |
| ENSG00000155111 | CDK19      | 90.383  | -0.649 | 9.853E-02 | 3.223E-01 | 158.691 | -0.273 | 3.237E-01 | 6.316E-01 |
| ENSG00000164172 | MOCS2      | 168.000 | -0.563 | 9.854E-02 | 3.223E-01 | 118.797 | -0.348 | 2.340E-01 | 5.394E-01 |

|                 |            |          |        |           |           |          |        |           |           |
|-----------------|------------|----------|--------|-----------|-----------|----------|--------|-----------|-----------|
| ENSG00000196850 | PPTC7      | 281.392  | 0.488  | 9.865E-02 | 3.224E-01 | 200.130  | 1.263  | 1.585E-04 | 6.188E-03 |
| ENSG00000038532 | CLEC16A    | 108.903  | -0.538 | 9.877E-02 | 3.226E-01 | 94.171   | -0.448 | 1.601E-01 | 4.508E-01 |
| ENSG00000160410 | SHKBP1     | 112.553  | -0.546 | 9.913E-02 | 3.234E-01 | 90.156   | -0.025 | 9.443E-01 | 9.794E-01 |
| ENSG00000106603 | COA1       | 257.395  | -0.559 | 9.932E-02 | 3.237E-01 | 181.640  | 0.256  | 3.782E-01 | 6.788E-01 |
| ENSG00000213516 | RBMXL1     | 159.312  | -0.518 | 9.942E-02 | 3.238E-01 | 144.510  | -0.177 | 5.050E-01 | 7.642E-01 |
| ENSG00000185090 | MANEAL     | 150.987  | -0.526 | 9.961E-02 | 3.241E-01 | 183.419  | -0.281 | 2.960E-01 | 6.060E-01 |
| ENSG00000147133 | TAF1       | 309.947  | -0.523 | 1.001E-01 | 3.251E-01 | 238.392  | -0.340 | 2.809E-01 | 5.921E-01 |
| ENSG00000100575 | TIMM9      | 288.379  | 0.477  | 1.002E-01 | 3.255E-01 | 245.341  | 0.710  | 2.401E-03 | 3.909E-02 |
| ENSG00000272578 | AP000347.1 | 36.266   | -0.769 | 1.005E-01 | 3.262E-01 | 24.941   | -0.833 | 4.380E-02 | 2.276E-01 |
| ENSG00000132437 | DDC        | 203.535  | -0.605 | 1.018E-01 | 3.292E-01 | 195.763  | -0.272 | 2.808E-01 | 5.921E-01 |
| ENSG00000148572 | NRBF2      | 198.803  | 0.493  | 1.020E-01 | 3.294E-01 | 172.607  | 0.589  | 3.682E-02 | 2.065E-01 |
| ENSG00000143373 | ZNF687     | 106.017  | -0.525 | 1.022E-01 | 3.297E-01 | 86.457   | -0.019 | 9.622E-01 | 9.846E-01 |
| ENSG00000125870 | SNRPB2     | 4419.296 | 0.324  | 1.024E-01 | 3.297E-01 | 3594.996 | 0.509  | 6.604E-03 | 7.511E-02 |
| ENSG00000169964 | TMEM42     | 54.484   | -0.687 | 1.031E-01 | 3.308E-01 | 77.967   | -0.110 | 7.312E-01 | 8.886E-01 |
| ENSG00000114735 | HEMK1      | 62.456   | -0.683 | 1.031E-01 | 3.308E-01 | 44.540   | -0.252 | 5.021E-01 | 7.624E-01 |
| ENSG00000081692 | JMJD4      | 101.685  | -0.579 | 1.030E-01 | 3.308E-01 | 120.250  | -0.438 | 1.593E-01 | 4.503E-01 |
| ENSG00000103888 | CEMIP      | 92.571   | -0.560 | 1.031E-01 | 3.308E-01 | 60.447   | -0.148 | 7.027E-01 | 8.744E-01 |
| ENSG00000127946 | HIP1       | 53.172   | -0.662 | 1.034E-01 | 3.311E-01 | 100.614  | -0.170 | 6.046E-01 | 8.254E-01 |
| ENSG00000078142 | PIK3C3     | 132.400  | -0.550 | 1.038E-01 | 3.318E-01 | 152.293  | -0.322 | 2.678E-01 | 5.776E-01 |
| ENSG00000080371 | RAB21      | 290.807  | 0.481  | 1.040E-01 | 3.322E-01 | 193.450  | 0.572  | 5.770E-02 | 2.633E-01 |
| ENSG00000188542 | DUSP28     | 32.168   | -0.769 | 1.048E-01 | 3.339E-01 | 37.809   | 0.386  | 3.189E-01 | 6.285E-01 |
| ENSG00000269688 | AC008982.2 | 55.803   | -0.711 | 1.051E-01 | 3.342E-01 | 24.999   | -0.093 | 8.204E-01 | 9.275E-01 |
| ENSG00000123473 | STIL       | 267.605  | -0.546 | 1.051E-01 | 3.342E-01 | 183.603  | 0.472  | 8.783E-02 | 3.285E-01 |
| ENSG00000139618 | BRCA2      | 245.487  | -0.501 | 1.052E-01 | 3.345E-01 | 216.446  | -0.367 | 1.675E-01 | 4.603E-01 |
| ENSG00000120539 | MASTL      | 71.239   | -0.584 | 1.057E-01 | 3.355E-01 | 41.547   | -0.306 | 4.463E-01 | 7.260E-01 |
| ENSG00000107882 | SUFU       | 52.889   | -0.752 | 1.059E-01 | 3.356E-01 | 73.508   | -0.431 | 1.862E-01 | 4.855E-01 |

|                 |            |          |        |           |           |         |        |           |           |
|-----------------|------------|----------|--------|-----------|-----------|---------|--------|-----------|-----------|
| ENSG00000115687 | PASK       | 82.546   | -0.593 | 1.060E-01 | 3.358E-01 | 74.409  | -0.459 | 1.870E-01 | 4.861E-01 |
| ENSG00000170085 | SIMC1      | 38.604   | -0.700 | 1.062E-01 | 3.359E-01 | 49.297  | 0.034  | 9.235E-01 | 9.719E-01 |
| ENSG00000235381 | AL596202.1 | 33.028   | -0.754 | 1.066E-01 | 3.360E-01 | 25.966  | 0.293  | 4.813E-01 | 7.513E-01 |
| ENSG00000168078 | PBK        | 137.188  | -0.547 | 1.066E-01 | 3.360E-01 | 199.976 | 0.013  | 9.637E-01 | 9.849E-01 |
| ENSG00000101216 | GMEB2      | 348.157  | 0.374  | 1.066E-01 | 3.360E-01 | 263.176 | 0.608  | 1.348E-02 | 1.169E-01 |
| ENSG00000167487 | KLHL26     | 44.237   | -0.812 | 1.075E-01 | 3.374E-01 | 64.922  | -0.333 | 3.362E-01 | 6.438E-01 |
| ENSG00000008869 | HEATR5B    | 101.157  | -0.592 | 1.075E-01 | 3.374E-01 | 59.511  | -0.169 | 6.259E-01 | 8.382E-01 |
| ENSG00000173588 | CEP83      | 87.581   | -0.575 | 1.075E-01 | 3.374E-01 | 87.493  | 0.038  | 9.116E-01 | 9.679E-01 |
| ENSG00000158169 | FANCC      | 67.432   | -0.676 | 1.084E-01 | 3.393E-01 | 66.345  | -0.073 | 8.421E-01 | 9.389E-01 |
| ENSG00000165406 | MARCH8     | 106.398  | -0.513 | 1.085E-01 | 3.393E-01 | 119.897 | -0.125 | 6.756E-01 | 8.605E-01 |
| ENSG00000177058 | SLC38A9    | 36.468   | -0.773 | 1.085E-01 | 3.393E-01 | 33.288  | 0.252  | 5.404E-01 | 7.878E-01 |
| ENSG00000112343 | TRIM38     | 40.351   | -0.719 | 1.086E-01 | 3.395E-01 | 104.126 | 0.016  | 9.589E-01 | 9.842E-01 |
| ENSG00000204634 | TBC1D8     | 154.875  | -0.501 | 1.089E-01 | 3.400E-01 | 222.624 | 0.185  | 5.397E-01 | 7.878E-01 |
| ENSG00000123178 | SPRYD7     | 134.812  | 0.479  | 1.088E-01 | 3.400E-01 | 137.954 | 0.505  | 1.010E-01 | 3.556E-01 |
| ENSG00000136710 | CCDC115    | 206.153  | -0.500 | 1.096E-01 | 3.414E-01 | 301.848 | 0.057  | 7.922E-01 | 9.172E-01 |
| ENSG00000166197 | NOLC1      | 1050.736 | 0.309  | 1.096E-01 | 3.414E-01 | 817.115 | 0.571  | 1.337E-02 | 1.160E-01 |
| ENSG00000127995 | CASD1      | 69.251   | -0.680 | 1.099E-01 | 3.420E-01 | 60.016  | -0.402 | 2.559E-01 | 5.663E-01 |
| ENSG00000188811 | NHLRC3     | 60.653   | -0.670 | 1.104E-01 | 3.433E-01 | 54.260  | -0.145 | 6.958E-01 | 8.702E-01 |
| ENSG00000105289 | TJP3       | 37.069   | -0.763 | 1.106E-01 | 3.439E-01 | 29.950  | -0.692 | 9.147E-02 | 3.357E-01 |
| ENSG00000139835 | GRTP1      | 131.826  | -0.538 | 1.110E-01 | 3.446E-01 | 88.724  | -0.187 | 5.471E-01 | 7.909E-01 |
| ENSG00000087299 | L2HGDH     | 31.714   | -0.830 | 1.112E-01 | 3.449E-01 | 59.514  | -0.482 | 2.286E-01 | 5.340E-01 |
| ENSG00000214194 | SMIM30     | 60.325   | -0.768 | 1.114E-01 | 3.453E-01 | 41.570  | 0.155  | 7.044E-01 | 8.748E-01 |
| ENSG00000101843 | PSMD10     | 112.748  | -0.550 | 1.116E-01 | 3.459E-01 | 99.540  | 0.119  | 6.931E-01 | 8.685E-01 |
| ENSG00000066933 | MYO9A      | 126.293  | -0.512 | 1.118E-01 | 3.462E-01 | 118.663 | -0.097 | 7.381E-01 | 8.914E-01 |
| ENSG00000213588 | ZBTB9      | 70.999   | -0.617 | 1.119E-01 | 3.463E-01 | 50.393  | -0.448 | 2.392E-01 | 5.465E-01 |
| ENSG00000243955 | GSTA1      | 203.319  | -0.556 | 1.120E-01 | 3.465E-01 | 112.277 | -0.446 | 1.649E-01 | 4.571E-01 |



|                 |            |         |        |           |           |         |        |           |           |
|-----------------|------------|---------|--------|-----------|-----------|---------|--------|-----------|-----------|
| ENSG00000103199 | ZNF500     | 75.580  | -0.591 | 1.121E-01 | 3.466E-01 | 83.253  | -0.262 | 4.353E-01 | 7.198E-01 |
| ENSG00000169379 | ARL13B     | 106.015 | -0.602 | 1.126E-01 | 3.476E-01 | 195.108 | 0.202  | 4.519E-01 | 7.306E-01 |
| ENSG00000181896 | ZNF101     | 115.949 | -0.540 | 1.127E-01 | 3.477E-01 | 102.219 | -0.246 | 4.302E-01 | 7.167E-01 |
| ENSG00000166855 | CLPX       | 244.519 | 0.403  | 1.127E-01 | 3.478E-01 | 179.672 | 0.596  | 3.420E-02 | 1.990E-01 |
| ENSG00000166579 | NDEL1      | 273.654 | 0.437  | 1.129E-01 | 3.482E-01 | 314.223 | 0.523  | 2.135E-02 | 1.534E-01 |
| ENSG00000198468 | FLVCR1-AS1 | 49.090  | -0.642 | 1.131E-01 | 3.485E-01 | 57.896  | -0.197 | 5.848E-01 | 8.136E-01 |
| ENSG00000023697 | DERA       | 104.330 | -0.618 | 1.139E-01 | 3.501E-01 | 138.489 | 0.139  | 6.937E-01 | 8.687E-01 |
| ENSG00000158769 | F11R       | 633.851 | 0.380  | 1.144E-01 | 3.508E-01 | 357.186 | 0.543  | 2.526E-02 | 1.679E-01 |
| ENSG00000132205 | EMILIN2    | 39.460  | -0.731 | 1.147E-01 | 3.512E-01 | 19.345  | -0.656 | 1.122E-01 | NA        |
| ENSG00000173349 | SFT2D3     | 62.549  | -0.616 | 1.151E-01 | 3.519E-01 | 68.332  | -0.298 | 3.961E-01 | 6.949E-01 |
| ENSG00000121039 | RDH10      | 54.518  | -0.662 | 1.159E-01 | 3.531E-01 | 61.722  | -0.232 | 5.105E-01 | 7.681E-01 |
| ENSG00000163611 | SPICE1     | 33.077  | -0.743 | 1.162E-01 | 3.536E-01 | 45.497  | 0.045  | 9.036E-01 | 9.643E-01 |
| ENSG00000165055 | METTL2B    | 101.979 | -0.665 | 1.163E-01 | 3.537E-01 | 100.954 | -0.438 | 1.717E-01 | 4.671E-01 |
| ENSG00000224597 | SVIL-AS1   | 178.934 | 0.494  | 1.165E-01 | 3.540E-01 | 148.069 | 0.633  | 4.207E-02 | 2.217E-01 |
| ENSG00000180089 | TMEM86B    | 163.141 | -0.564 | 1.176E-01 | 3.557E-01 | 113.051 | -0.180 | 5.970E-01 | 8.201E-01 |
| ENSG00000272994 | AC012360.3 | 56.708  | -0.620 | 1.181E-01 | 3.569E-01 | 86.172  | -0.285 | 4.004E-01 | 6.978E-01 |
| ENSG00000143842 | SOX13      | 139.560 | -0.544 | 1.182E-01 | 3.569E-01 | 136.721 | 0.227  | 4.090E-01 | 7.033E-01 |
| ENSG00000125629 | INSIG2     | 135.315 | -0.556 | 1.186E-01 | 3.577E-01 | 72.614  | -0.046 | 8.997E-01 | 9.629E-01 |
| ENSG00000077157 | PPP1R12B   | 77.561  | -0.547 | 1.196E-01 | 3.594E-01 | 108.156 | -0.212 | 5.363E-01 | 7.865E-01 |
| ENSG00000198001 | IRAK4      | 32.140  | -0.706 | 1.197E-01 | 3.595E-01 | 51.811  | -0.315 | 3.908E-01 | 6.891E-01 |
| ENSG00000163975 | MELTF      | 138.777 | -0.605 | 1.199E-01 | 3.597E-01 | 93.483  | -0.046 | 8.990E-01 | 9.629E-01 |
| ENSG00000268713 | AC005261.3 | 35.422  | -0.781 | 1.200E-01 | 3.597E-01 | 32.664  | -0.001 | 9.984E-01 | 9.997E-01 |
| ENSG00000112578 | BYSL       | 355.466 | 0.367  | 1.203E-01 | 3.601E-01 | 273.564 | 0.537  | 1.597E-02 | 1.294E-01 |
| ENSG00000102882 | MAPK3      | 90.535  | -0.674 | 1.206E-01 | 3.606E-01 | 69.431  | -0.499 | 2.162E-01 | 5.213E-01 |
| ENSG00000165282 | PIGO       | 57.465  | -0.602 | 1.207E-01 | 3.607E-01 | 36.041  | 0.525  | 1.986E-01 | 4.997E-01 |
| ENSG00000280206 | AC026401.3 | 218.952 | 0.456  | 1.207E-01 | 3.608E-01 | 194.408 | 0.558  | 3.585E-02 | 2.032E-01 |

|                 |              |         |        |           |           |         |        |           |           |
|-----------------|--------------|---------|--------|-----------|-----------|---------|--------|-----------|-----------|
| ENSG00000107816 | LZTS2        | 159.709 | -0.561 | 1.211E-01 | 3.610E-01 | 93.426  | 0.128  | 6.701E-01 | 8.578E-01 |
| ENSG00000129810 | SGO1         | 127.458 | -0.504 | 1.211E-01 | 3.610E-01 | 95.329  | 0.098  | 7.571E-01 | 9.007E-01 |
| ENSG00000139718 | SETD1B       | 101.033 | -0.522 | 1.213E-01 | 3.615E-01 | 87.119  | -0.242 | 4.595E-01 | 7.377E-01 |
| ENSG00000012817 | KDM5D        | 64.793  | -0.588 | 1.216E-01 | 3.617E-01 | 88.693  | 0.225  | 4.862E-01 | 7.530E-01 |
| ENSG00000198863 | RUNDC1       | 111.355 | -0.541 | 1.215E-01 | 3.617E-01 | 140.993 | -0.324 | 2.853E-01 | 5.965E-01 |
| ENSG00000120647 | CCDC77       | 74.981  | -0.622 | 1.218E-01 | 3.618E-01 | 68.628  | -0.352 | 3.498E-01 | 6.557E-01 |
| ENSG00000057757 | PITHD1       | 167.939 | 0.467  | 1.218E-01 | 3.620E-01 | 170.264 | 0.508  | 5.748E-02 | 2.629E-01 |
| ENSG00000196730 | DAPK1        | 78.843  | -0.616 | 1.234E-01 | 3.650E-01 | 52.524  | 0.125  | 7.258E-01 | 8.861E-01 |
| ENSG00000143776 | CDC42BPA     | 116.632 | -0.576 | 1.235E-01 | 3.650E-01 | 143.698 | -0.191 | 4.718E-01 | 7.468E-01 |
| ENSG00000115084 | SLC35F5      | 134.329 | -0.577 | 1.249E-01 | 3.672E-01 | 156.972 | 0.308  | 2.504E-01 | 5.594E-01 |
| ENSG00000172765 | TMCC1        | 155.791 | -0.507 | 1.251E-01 | 3.675E-01 | 152.857 | -0.375 | 1.929E-01 | 4.935E-01 |
| ENSG00000165527 | ARF6         | 328.531 | 0.403  | 1.255E-01 | 3.682E-01 | 332.980 | 0.559  | 1.367E-02 | 1.174E-01 |
| ENSG00000177646 | ACAD9        | 128.152 | -0.565 | 1.271E-01 | 3.712E-01 | 128.516 | -0.394 | 1.608E-01 | 4.510E-01 |
| ENSG00000171700 | RGS19        | 49.278  | -0.684 | 1.293E-01 | 3.758E-01 | 36.636  | 0.173  | 6.610E-01 | 8.536E-01 |
| ENSG00000115392 | FANCL        | 140.004 | -0.537 | 1.295E-01 | 3.760E-01 | 125.888 | -0.442 | 1.710E-01 | 4.659E-01 |
| ENSG00000122958 | VPS26A       | 257.191 | 0.460  | 1.299E-01 | 3.767E-01 | 245.345 | 0.675  | 6.923E-03 | 7.746E-02 |
| ENSG00000262758 | CTD-3195I5.1 | 37.545  | -0.686 | 1.300E-01 | 3.770E-01 | 35.669  | -0.295 | 4.689E-01 | 7.442E-01 |
| ENSG00000040933 | INPP4A       | 41.959  | -0.708 | 1.302E-01 | 3.771E-01 | 40.773  | -0.330 | 4.051E-01 | 7.010E-01 |
| ENSG00000182944 | EWSR1        | 953.162 | 0.335  | 1.303E-01 | 3.771E-01 | 785.810 | 0.815  | 2.820E-04 | 9.261E-03 |
| ENSG00000160284 | SPATC1L      | 58.046  | -0.630 | 1.305E-01 | 3.774E-01 | 56.833  | -0.062 | 8.716E-01 | 9.512E-01 |
| ENSG00000100823 | APEX1        | 928.047 | -0.500 | 1.305E-01 | 3.774E-01 | 663.194 | 0.099  | 6.967E-01 | 8.709E-01 |
| ENSG00000160408 | ST6GALNAC6   | 41.921  | -0.643 | 1.313E-01 | 3.791E-01 | 16.169  | -0.101 | 7.032E-01 | NA        |
| ENSG00000143390 | RFX5         | 50.770  | -0.613 | 1.322E-01 | 3.811E-01 | 54.779  | -0.119 | 7.397E-01 | 8.922E-01 |
| ENSG00000025434 | NR1H3        | 100.067 | -0.528 | 1.329E-01 | 3.823E-01 | 92.381  | -0.020 | 9.498E-01 | 9.815E-01 |
| ENSG00000185278 | ZBTB37       | 59.090  | -0.646 | 1.332E-01 | 3.826E-01 | 51.800  | -0.100 | 7.854E-01 | 9.132E-01 |
| ENSG00000120054 | CPN1         | 77.120  | -0.635 | 1.333E-01 | 3.826E-01 | 79.749  | -0.043 | 8.999E-01 | 9.629E-01 |

|                 |          |          |        |           |           |          |        |           |           |
|-----------------|----------|----------|--------|-----------|-----------|----------|--------|-----------|-----------|
| ENSG00000263956 | NBPF11   | 44.334   | -0.724 | 1.336E-01 | 3.833E-01 | 43.459   | 0.612  | 1.274E-01 | 4.029E-01 |
| ENSG00000138308 | PLA2G12B | 74.342   | -0.571 | 1.336E-01 | 3.833E-01 | 77.900   | -0.475 | 1.590E-01 | 4.498E-01 |
| ENSG00000196912 | ANKRD36B | 36.191   | -0.697 | 1.347E-01 | 3.853E-01 | 52.799   | -0.393 | 2.670E-01 | 5.767E-01 |
| ENSG00000126603 | GLIS2    | 22.292   | 0.797  | 1.352E-01 | 3.865E-01 | 47.053   | 0.569  | 1.388E-01 | 4.208E-01 |
| ENSG00000142892 | PIGK     | 42.769   | -0.670 | 1.356E-01 | 3.872E-01 | 45.984   | 0.175  | 6.453E-01 | 8.463E-01 |
| ENSG00000184162 | NR2C2AP  | 190.911  | 0.464  | 1.359E-01 | 3.880E-01 | 119.713  | 0.609  | 3.265E-02 | 1.931E-01 |
| ENSG00000014123 | UFL1     | 234.553  | 0.393  | 1.370E-01 | 3.898E-01 | 248.412  | 0.506  | 4.805E-02 | 2.383E-01 |
| ENSG00000102781 | KATNAL1  | 63.572   | -0.583 | 1.376E-01 | 3.906E-01 | 56.162   | -0.037 | 9.167E-01 | 9.692E-01 |
| ENSG00000064999 | ANKS1A   | 119.153  | -0.539 | 1.376E-01 | 3.906E-01 | 116.609  | -0.098 | 7.648E-01 | 9.036E-01 |
| ENSG00000135622 | SEMA4F   | 49.666   | -0.618 | 1.383E-01 | 3.916E-01 | 34.051   | -0.355 | 3.671E-01 | 6.712E-01 |
| ENSG00000198464 | ZNF480   | 67.916   | -0.562 | 1.388E-01 | 3.925E-01 | 83.736   | -0.218 | 5.032E-01 | 7.636E-01 |
| ENSG00000198176 | TFDP1    | 1112.433 | 0.323  | 1.389E-01 | 3.927E-01 | 1096.923 | 0.624  | 1.096E-03 | 2.389E-02 |
| ENSG00000171867 | PRNP     | 527.626  | 0.466  | 1.390E-01 | 3.927E-01 | 453.902  | 0.618  | 8.731E-03 | 9.006E-02 |
| ENSG00000166478 | ZNF143   | 57.521   | -0.608 | 1.391E-01 | 3.930E-01 | 46.035   | 0.132  | 7.421E-01 | 8.930E-01 |
| ENSG00000089775 | ZBTB25   | 31.404   | -0.695 | 1.397E-01 | 3.938E-01 | 33.779   | 0.180  | 6.510E-01 | 8.495E-01 |
| ENSG00000008282 | SYPL1    | 333.374  | 0.397  | 1.397E-01 | 3.938E-01 | 299.057  | 0.579  | 2.089E-02 | 1.519E-01 |
| ENSG00000110104 | CCDC86   | 811.440  | 0.445  | 1.398E-01 | 3.938E-01 | 440.106  | 0.879  | 1.549E-04 | 6.120E-03 |
| ENSG00000102871 | TRADD    | 88.387   | -0.514 | 1.411E-01 | 3.963E-01 | 89.869   | -0.222 | 4.837E-01 | 7.530E-01 |
| ENSG00000105866 | SP4      | 32.310   | -0.688 | 1.416E-01 | 3.968E-01 | 34.675   | 0.432  | 2.756E-01 | 5.860E-01 |
| ENSG00000180198 | RCC1     | 459.231  | -0.511 | 1.418E-01 | 3.970E-01 | 286.405  | 0.462  | 7.782E-02 | 3.071E-01 |
| ENSG00000108961 | RANGRF   | 450.491  | 0.368  | 1.418E-01 | 3.970E-01 | 366.924  | 0.640  | 2.874E-03 | 4.405E-02 |
| ENSG00000162378 | ZYG11B   | 128.213  | -0.520 | 1.420E-01 | 3.973E-01 | 151.969  | -0.372 | 2.169E-01 | 5.220E-01 |
| ENSG00000153107 | ANAPC1   | 162.463  | 0.484  | 1.424E-01 | 3.979E-01 | 134.047  | 0.921  | 1.118E-03 | 2.418E-02 |
| ENSG00000246273 | SBF2-AS1 | 37.241   | -0.673 | 1.426E-01 | 3.982E-01 | 31.942   | 0.200  | 6.133E-01 | 8.302E-01 |
| ENSG00000197056 | ZMYM1    | 30.165   | -0.697 | 1.432E-01 | 3.993E-01 | 30.737   | -0.062 | 8.776E-01 | 9.526E-01 |
| ENSG00000007062 | PROM1    | 46.271   | -0.618 | 1.436E-01 | 4.000E-01 | 53.253   | 0.258  | 5.064E-01 | 7.649E-01 |

|                 |            |          |        |           |           |          |        |           |           |
|-----------------|------------|----------|--------|-----------|-----------|----------|--------|-----------|-----------|
| ENSG00000169504 | CLIC4      | 336.592  | 0.433  | 1.438E-01 | 4.002E-01 | 276.259  | 0.573  | 6.422E-02 | 2.784E-01 |
| ENSG00000170270 | GON7       | 69.704   | -0.676 | 1.448E-01 | 4.027E-01 | 54.239   | -0.062 | 8.768E-01 | 9.525E-01 |
| ENSG00000111879 | FAM184A    | 62.570   | -0.611 | 1.450E-01 | 4.027E-01 | 92.174   | -0.193 | 5.406E-01 | 7.878E-01 |
| ENSG00000183475 | ASB7       | 89.516   | -0.567 | 1.451E-01 | 4.028E-01 | 76.863   | 0.057  | 8.615E-01 | 9.475E-01 |
| ENSG00000079974 | RABL2B     | 159.158  | -0.528 | 1.451E-01 | 4.028E-01 | 244.623  | -0.188 | 5.346E-01 | 7.856E-01 |
| ENSG00000108518 | PFN1       | 2261.782 | 0.412  | 1.451E-01 | 4.028E-01 | 2257.574 | 0.545  | 2.266E-03 | 3.770E-02 |
| ENSG00000101986 | ABCD1      | 45.592   | -0.691 | 1.452E-01 | 4.029E-01 | 40.017   | 0.721  | 6.715E-02 | 2.847E-01 |
| ENSG00000205138 | SDHAF1     | 85.492   | -0.519 | 1.452E-01 | 4.029E-01 | 122.088  | 0.476  | 1.177E-01 | 3.855E-01 |
| ENSG00000163453 | IGFBP7     | 32.885   | -0.743 | 1.454E-01 | 4.031E-01 | 24.792   | -0.573 | 1.723E-01 | 4.682E-01 |
| ENSG00000140950 | TLDC1      | 81.458   | -0.547 | 1.456E-01 | 4.033E-01 | 77.042   | -0.289 | 4.007E-01 | 6.979E-01 |
| ENSG00000106591 | MRPL32     | 216.606  | 0.488  | 1.456E-01 | 4.033E-01 | 138.384  | 1.085  | 4.429E-04 | 1.298E-02 |
| ENSG00000126775 | ATG14      | 193.992  | 0.493  | 1.462E-01 | 4.038E-01 | 155.183  | 0.502  | 8.845E-02 | 3.299E-01 |
| ENSG00000172766 | NAA16      | 139.876  | 0.500  | 1.462E-01 | 4.038E-01 | 138.724  | 0.636  | 2.729E-02 | 1.740E-01 |
| ENSG00000267317 | AC027307.2 | 39.115   | -0.643 | 1.462E-01 | 4.038E-01 | 69.316   | -0.320 | 4.043E-01 | 7.008E-01 |
| ENSG00000144134 | RABL2A     | 34.776   | -0.662 | 1.463E-01 | 4.039E-01 | 49.460   | -0.323 | 4.080E-01 | 7.028E-01 |
| ENSG00000132906 | CASP9      | 47.841   | -0.674 | 1.471E-01 | 4.050E-01 | 41.656   | 0.016  | 9.690E-01 | 9.871E-01 |
| ENSG00000184445 | KNTC1      | 76.211   | -0.579 | 1.473E-01 | 4.054E-01 | 75.809   | -0.013 | 9.678E-01 | 9.870E-01 |
| ENSG00000280138 | AC027290.2 | 21.377   | 0.750  | 1.490E-01 | 4.084E-01 | 36.351   | 0.640  | 1.182E-01 | 3.856E-01 |
| ENSG00000115750 | TAF1B      | 90.055   | -0.574 | 1.496E-01 | 4.092E-01 | 139.300  | -0.339 | 2.180E-01 | 5.232E-01 |
| ENSG00000051382 | PIK3CB     | 122.455  | -0.573 | 1.499E-01 | 4.093E-01 | 97.989   | 0.525  | 9.483E-02 | 3.420E-01 |
| ENSG00000131873 | CHSY1      | 92.619   | -0.502 | 1.503E-01 | 4.094E-01 | 90.020   | 0.219  | 4.837E-01 | 7.530E-01 |
| ENSG00000163697 | APBB2      | 95.649   | -0.538 | 1.506E-01 | 4.098E-01 | 105.952  | -0.477 | 1.152E-01 | 3.803E-01 |
| ENSG00000115107 | STEAP3     | 78.034   | -0.533 | 1.519E-01 | 4.122E-01 | 61.988   | 0.180  | 6.112E-01 | 8.292E-01 |
| ENSG00000225921 | NOL7       | 1516.833 | 0.312  | 1.520E-01 | 4.124E-01 | 1098.530 | 0.554  | 3.165E-03 | 4.731E-02 |
| ENSG00000139687 | RB1        | 137.703  | -0.550 | 1.522E-01 | 4.125E-01 | 124.465  | 0.243  | 4.738E-01 | 7.471E-01 |
| ENSG00000116212 | LRRC42     | 637.325  | 0.345  | 1.528E-01 | 4.131E-01 | 484.056  | 0.622  | 7.989E-03 | 8.492E-02 |

|                 |            |          |        |           |           |          |        |           |           |
|-----------------|------------|----------|--------|-----------|-----------|----------|--------|-----------|-----------|
| ENSG00000241878 | PISD       | 301.627  | 0.492  | 1.538E-01 | 4.150E-01 | 203.406  | 0.589  | 2.420E-02 | 1.652E-01 |
| ENSG00000204237 | OXLD1      | 169.800  | -0.517 | 1.539E-01 | 4.151E-01 | 184.455  | -0.240 | 3.356E-01 | 6.434E-01 |
| ENSG00000269947 | AC135178.5 | 30.014   | -0.653 | 1.540E-01 | 4.152E-01 | 22.173   | -0.518 | 2.146E-01 | NA        |
| ENSG00000089022 | MAPKAPK5   | 327.946  | 0.408  | 1.552E-01 | 4.171E-01 | 238.206  | 0.566  | 5.909E-02 | 2.671E-01 |
| ENSG00000189171 | S100A13    | 493.926  | 0.367  | 1.564E-01 | 4.184E-01 | 331.861  | 0.665  | 8.975E-03 | 9.125E-02 |
| ENSG00000143756 | FBXO28     | 56.699   | -0.543 | 1.569E-01 | 4.193E-01 | 49.804   | 0.439  | 2.317E-01 | 5.375E-01 |
| ENSG00000138658 | ZGRF1      | 40.202   | -0.670 | 1.572E-01 | 4.199E-01 | 22.381   | -0.299 | 4.689E-01 | NA        |
| ENSG00000047634 | SCML1      | 146.029  | -0.578 | 1.575E-01 | 4.200E-01 | 87.108   | 0.069  | 8.281E-01 | 9.320E-01 |
| ENSG00000155906 | RMND1      | 132.789  | 0.470  | 1.575E-01 | 4.200E-01 | 107.998  | 0.951  | 8.210E-03 | 8.686E-02 |
| ENSG00000185730 | ZNF696     | 60.506   | -0.610 | 1.586E-01 | 4.214E-01 | 51.998   | 0.091  | 8.190E-01 | 9.271E-01 |
| ENSG00000153046 | CDYL       | 249.744  | 0.357  | 1.592E-01 | 4.223E-01 | 255.183  | 0.530  | 2.881E-02 | 1.802E-01 |
| ENSG00000180758 | GPR157     | 101.876  | -0.466 | 1.594E-01 | 4.226E-01 | 134.866  | 0.619  | 3.191E-02 | 1.908E-01 |
| ENSG00000158457 | TSPAN33    | 45.463   | -0.588 | 1.595E-01 | 4.227E-01 | 51.814   | 0.211  | 5.676E-01 | 8.032E-01 |
| ENSG00000169683 | LRRC45     | 42.690   | -0.617 | 1.607E-01 | 4.243E-01 | 23.119   | -0.077 | 8.533E-01 | 9.443E-01 |
| ENSG00000109971 | HSPA8      | 1269.154 | -0.710 | 1.609E-01 | 4.244E-01 | 993.037  | -0.470 | 5.492E-02 | 2.564E-01 |
| ENSG00000141564 | RPTOR      | 73.537   | -0.552 | 1.616E-01 | 4.256E-01 | 77.296   | -0.381 | 2.280E-01 | 5.334E-01 |
| ENSG00000121578 | B4GALT4    | 128.027  | -0.569 | 1.622E-01 | 4.260E-01 | 94.188   | 0.919  | 6.078E-03 | 7.173E-02 |
| ENSG00000066379 | ZNRD1      | 281.011  | 0.412  | 1.631E-01 | 4.275E-01 | 215.202  | 0.695  | 1.789E-02 | 1.383E-01 |
| ENSG00000070423 | RNF126     | 1851.780 | 0.338  | 1.641E-01 | 4.289E-01 | 1688.254 | 0.689  | 2.083E-03 | 3.568E-02 |
| ENSG00000108061 | SHOC2      | 194.836  | 0.469  | 1.642E-01 | 4.291E-01 | 221.944  | 0.501  | 6.770E-02 | 2.853E-01 |
| ENSG00000116774 | OLFML3     | 36.882   | -0.659 | 1.643E-01 | 4.292E-01 | 41.581   | -0.110 | 7.858E-01 | 9.133E-01 |
| ENSG00000123545 | NDUFAF4    | 263.828  | 0.431  | 1.647E-01 | 4.296E-01 | 185.814  | 0.736  | 7.305E-03 | 7.957E-02 |
| ENSG00000259417 | CTXND1     | 32.255   | -0.631 | 1.647E-01 | 4.297E-01 | 18.533   | -0.816 | 5.084E-02 | NA        |
| ENSG00000172159 | FRMD3      | 61.178   | -0.545 | 1.676E-01 | 4.338E-01 | 61.863   | 0.260  | 4.677E-01 | 7.436E-01 |
| ENSG00000104133 | SPG11      | 48.708   | -0.642 | 1.681E-01 | 4.340E-01 | 58.177   | 0.048  | 8.920E-01 | 9.592E-01 |
| ENSG00000142632 | ARHGEF19   | 45.158   | -0.583 | 1.680E-01 | 4.340E-01 | 57.309   | 0.414  | 2.638E-01 | 5.739E-01 |

|                 |            |          |        |           |           |          |        |           |           |
|-----------------|------------|----------|--------|-----------|-----------|----------|--------|-----------|-----------|
| ENSG00000060642 | PIGV       | 39.134   | -0.713 | 1.686E-01 | 4.347E-01 | 51.927   | -0.324 | 3.828E-01 | 6.825E-01 |
| ENSG00000181938 | GIN53      | 79.169   | -0.530 | 1.687E-01 | 4.348E-01 | 69.376   | -0.288 | 4.189E-01 | 7.095E-01 |
| ENSG00000115317 | HTRA2      | 123.024  | -0.506 | 1.698E-01 | 4.366E-01 | 99.160   | 0.262  | 4.248E-01 | 7.133E-01 |
| ENSG00000198105 | ZNF248     | 38.107   | -0.587 | 1.701E-01 | 4.371E-01 | 61.233   | -0.450 | 1.979E-01 | 4.992E-01 |
| ENSG00000153406 | NMRAL1     | 43.356   | -0.654 | 1.705E-01 | 4.377E-01 | 25.362   | -1.178 | 4.486E-03 | 5.971E-02 |
| ENSG00000212385 | RNU6-817P  | 30.345   | -0.618 | 1.715E-01 | 4.388E-01 | 23.918   | -0.428 | 3.045E-01 | 6.153E-01 |
| ENSG00000166997 | CNPY4      | 41.557   | -0.596 | 1.716E-01 | 4.391E-01 | 39.548   | -0.076 | 8.535E-01 | 9.443E-01 |
| ENSG00000135069 | PSAT1      | 1726.034 | -0.361 | 1.731E-01 | 4.412E-01 | 1218.252 | 0.552  | 7.669E-03 | 8.248E-02 |
| ENSG00000189308 | LIN54      | 172.826  | -0.519 | 1.740E-01 | 4.423E-01 | 103.047  | 0.473  | 1.817E-01 | 4.803E-01 |
| ENSG00000119682 | AREL1      | 70.317   | -0.517 | 1.750E-01 | 4.435E-01 | 102.069  | 0.642  | 3.261E-02 | 1.931E-01 |
| ENSG00000106366 | SERPINE1   | 382.518  | 0.448  | 1.758E-01 | 4.444E-01 | 251.640  | 1.101  | 4.657E-04 | 1.349E-02 |
| ENSG00000172785 | CBWD1      | 64.633   | -0.540 | 1.760E-01 | 4.447E-01 | 48.923   | -0.198 | 5.933E-01 | 8.182E-01 |
| ENSG00000147316 | MCPH1      | 94.002   | 0.482  | 1.762E-01 | 4.448E-01 | 86.081   | 0.627  | 5.750E-02 | 2.629E-01 |
| ENSG00000133816 | MICAL2     | 34.855   | -0.638 | 1.763E-01 | 4.449E-01 | 32.364   | 0.149  | 7.174E-01 | 8.827E-01 |
| ENSG00000263563 | AC138761.1 | 34.226   | -0.677 | 1.766E-01 | 4.453E-01 | 43.162   | 0.205  | 5.870E-01 | 8.142E-01 |
| ENSG00000241399 | CD302      | 30.715   | -0.635 | 1.766E-01 | 4.453E-01 | 26.242   | -0.174 | 6.729E-01 | 8.594E-01 |
| ENSG00000153561 | RMND5A     | 600.258  | 0.347  | 1.766E-01 | 4.453E-01 | 486.495  | 0.601  | 8.943E-03 | 9.125E-02 |
| ENSG00000085491 | SLC25A24   | 70.759   | -0.608 | 1.769E-01 | 4.457E-01 | 73.592   | -0.267 | 4.721E-01 | 7.468E-01 |
| ENSG00000110906 | KCTD10     | 184.014  | 0.423  | 1.770E-01 | 4.457E-01 | 212.674  | 0.528  | 3.915E-02 | 2.138E-01 |
| ENSG00000006459 | KDM7A      | 132.571  | 0.458  | 1.773E-01 | 4.462E-01 | 128.143  | 0.901  | 1.189E-02 | 1.084E-01 |
| ENSG00000043514 | TRIT1      | 96.063   | 0.490  | 1.776E-01 | 4.465E-01 | 81.045   | 0.708  | 4.663E-02 | 2.350E-01 |
| ENSG00000064651 | SLC12A2    | 101.854  | -0.516 | 1.779E-01 | 4.465E-01 | 82.090   | -0.491 | 1.582E-01 | 4.484E-01 |
| ENSG00000163933 | RFT1       | 211.523  | -0.400 | 1.786E-01 | 4.475E-01 | 171.526  | 0.504  | 7.612E-02 | 3.039E-01 |
| ENSG00000085998 | POMGNT1    | 64.044   | -0.501 | 1.791E-01 | 4.479E-01 | 76.840   | -0.271 | 4.098E-01 | 7.035E-01 |
| ENSG00000273456 | AC064836.3 | 35.538   | -0.592 | 1.796E-01 | 4.486E-01 | 55.295   | 0.069  | 8.518E-01 | 9.441E-01 |
| ENSG00000176532 | PRR15      | 47.700   | -0.589 | 1.795E-01 | 4.486E-01 | 77.702   | -0.007 | 9.847E-01 | 9.936E-01 |

|                 |         |         |        |           |           |         |        |           |           |
|-----------------|---------|---------|--------|-----------|-----------|---------|--------|-----------|-----------|
| ENSG00000120008 | WDR11   | 61.745  | -0.615 | 1.797E-01 | 4.487E-01 | 81.471  | -0.116 | 7.323E-01 | 8.888E-01 |
| ENSG00000103067 | ESRP2   | 77.950  | -0.561 | 1.804E-01 | 4.498E-01 | 123.204 | -0.095 | 7.488E-01 | 8.957E-01 |
| ENSG00000119723 | COQ6    | 102.450 | -0.505 | 1.816E-01 | 4.514E-01 | 89.586  | 0.095  | 7.976E-01 | 9.188E-01 |
| ENSG00000055208 | TAB2    | 253.352 | 0.427  | 1.818E-01 | 4.516E-01 | 245.785 | 0.820  | 1.955E-03 | 3.406E-02 |
| ENSG00000231607 | DLEU2   | 80.011  | -0.543 | 1.820E-01 | 4.519E-01 | 75.793  | 0.020  | 9.518E-01 | 9.821E-01 |
| ENSG00000183309 | ZNF623  | 33.838  | -0.611 | 1.825E-01 | 4.526E-01 | 28.643  | -0.719 | 8.019E-02 | 3.128E-01 |
| ENSG00000153989 | NUS1    | 105.232 | -0.512 | 1.833E-01 | 4.539E-01 | 60.545  | 0.679  | 5.546E-02 | 2.579E-01 |
| ENSG00000151576 | QTRT2   | 222.998 | 0.462  | 1.839E-01 | 4.547E-01 | 172.155 | 0.520  | 6.976E-02 | 2.892E-01 |
| ENSG00000145740 | SLC30A5 | 63.996  | -0.525 | 1.844E-01 | 4.557E-01 | 54.189  | 0.280  | 4.364E-01 | 7.203E-01 |
| ENSG00000188725 | SMIM15  | 330.508 | 0.401  | 1.851E-01 | 4.567E-01 | 279.454 | 0.589  | 1.894E-02 | 1.440E-01 |
| ENSG00000008323 | PLEKHG6 | 40.739  | -0.581 | 1.856E-01 | 4.575E-01 | 33.700  | 0.163  | 6.842E-01 | 8.648E-01 |
| ENSG00000023330 | ALAS1   | 125.645 | 0.464  | 1.861E-01 | 4.580E-01 | 86.068  | 0.662  | 3.242E-02 | 1.924E-01 |
| ENSG00000127870 | RNF6    | 75.295  | 0.471  | 1.864E-01 | 4.585E-01 | 97.828  | 0.553  | 7.011E-02 | 2.898E-01 |
| ENSG00000198898 | CAPZA2  | 274.335 | 0.404  | 1.865E-01 | 4.586E-01 | 196.485 | 0.537  | 4.993E-02 | 2.431E-01 |
| ENSG00000143771 | CNIH4   | 413.014 | 0.404  | 1.865E-01 | 4.586E-01 | 357.565 | 0.549  | 1.337E-02 | 1.160E-01 |
| ENSG00000154124 | OTULIN  | 173.720 | 0.396  | 1.876E-01 | 4.604E-01 | 144.897 | 0.542  | 5.177E-02 | 2.484E-01 |
| ENSG00000065970 | FOXJ2   | 97.221  | 0.465  | 1.877E-01 | 4.605E-01 | 101.208 | 0.847  | 6.939E-03 | 7.746E-02 |
| ENSG00000130810 | PPAN    | 91.635  | -0.518 | 1.888E-01 | 4.620E-01 | 74.894  | -0.405 | 2.298E-01 | 5.353E-01 |
| ENSG00000117625 | RCOR3   | 144.633 | 0.393  | 1.893E-01 | 4.625E-01 | 170.708 | 0.805  | 2.291E-03 | 3.793E-02 |
| ENSG00000167721 | TSR1    | 840.762 | 0.276  | 1.895E-01 | 4.626E-01 | 745.763 | 0.688  | 7.060E-04 | 1.785E-02 |
| ENSG00000197766 | CFD     | 56.037  | -0.524 | 1.896E-01 | 4.627E-01 | 82.836  | -0.453 | 1.951E-01 | 4.961E-01 |
| ENSG00000013573 | DDX11   | 58.077  | -0.503 | 1.899E-01 | 4.630E-01 | 59.020  | -0.373 | 2.885E-01 | 5.993E-01 |
| ENSG00000155034 | FBXL18  | 30.993  | -0.612 | 1.907E-01 | 4.641E-01 | 28.660  | 0.147  | 7.197E-01 | 8.832E-01 |
| ENSG00000105879 | CBLL1   | 79.837  | -0.502 | 1.912E-01 | 4.647E-01 | 67.981  | 0.065  | 8.645E-01 | 9.489E-01 |
| ENSG00000010278 | CD9     | 33.908  | -0.674 | 1.914E-01 | 4.649E-01 | 20.845  | 0.107  | 7.946E-01 | NA        |
| ENSG00000175893 | ZDHHC21 | 77.720  | -0.517 | 1.918E-01 | 4.651E-01 | 79.404  | -0.436 | 1.715E-01 | 4.669E-01 |

|                 |            |         |        |           |           |         |        |           |           |
|-----------------|------------|---------|--------|-----------|-----------|---------|--------|-----------|-----------|
| ENSG00000135473 | PAN2       | 35.072  | -0.609 | 1.922E-01 | 4.656E-01 | 39.078  | -0.270 | 5.093E-01 | 7.672E-01 |
| ENSG00000172354 | GNB2       | 226.223 | 0.490  | 1.929E-01 | 4.662E-01 | 127.203 | 0.985  | 7.877E-03 | 8.394E-02 |
| ENSG00000143919 | CAMKMT     | 53.569  | -0.570 | 1.937E-01 | 4.675E-01 | 61.349  | 0.626  | 1.034E-01 | 3.602E-01 |
| ENSG00000123191 | ATP7B      | 85.897  | -0.581 | 1.958E-01 | 4.703E-01 | 77.273  | -0.105 | 7.518E-01 | 8.973E-01 |
| ENSG00000164074 | ABHD18     | 78.080  | -0.514 | 1.960E-01 | 4.704E-01 | 56.761  | 0.209  | 5.699E-01 | 8.051E-01 |
| ENSG00000177854 | TMEM187    | 38.184  | -0.556 | 1.966E-01 | 4.713E-01 | 29.535  | -0.421 | 2.969E-01 | 6.071E-01 |
| ENSG00000187790 | FANCM      | 43.838  | -0.615 | 1.972E-01 | 4.719E-01 | 34.153  | -0.162 | 6.951E-01 | 8.696E-01 |
| ENSG00000163320 | CGGBP1     | 186.650 | 0.369  | 1.988E-01 | 4.739E-01 | 174.945 | 0.529  | 6.736E-02 | 2.850E-01 |
| ENSG00000169062 | UPF3A      | 358.678 | 0.293  | 1.995E-01 | 4.746E-01 | 281.428 | 0.564  | 2.019E-02 | 1.488E-01 |
| ENSG00000179041 | RRS1       | 284.436 | 0.372  | 1.993E-01 | 4.746E-01 | 185.186 | 0.815  | 3.279E-03 | 4.846E-02 |
| ENSG00000103657 | HERC1      | 155.490 | -0.519 | 2.000E-01 | 4.750E-01 | 182.062 | -0.350 | 1.889E-01 | 4.878E-01 |
| ENSG00000236255 | AC009404.1 | 44.357  | -0.548 | 2.010E-01 | 4.760E-01 | 37.103  | -0.290 | 4.612E-01 | 7.389E-01 |
| ENSG00000174791 | RIN1       | 48.611  | -0.518 | 2.019E-01 | 4.769E-01 | 49.678  | -0.130 | 7.327E-01 | 8.888E-01 |
| ENSG00000107362 | ABHD17B    | 107.111 | 0.462  | 2.022E-01 | 4.774E-01 | 82.851  | 0.773  | 2.666E-02 | 1.721E-01 |
| ENSG00000178445 | GLDC       | 134.190 | -0.677 | 2.027E-01 | 4.777E-01 | 76.467  | -0.054 | 8.817E-01 | 9.547E-01 |
| ENSG00000104177 | MYEF2      | 45.585  | -0.535 | 2.026E-01 | 4.777E-01 | 76.281  | -0.198 | 5.479E-01 | 7.916E-01 |
| ENSG00000144867 | SRPRB      | 812.183 | 0.258  | 2.032E-01 | 4.783E-01 | 682.858 | 0.775  | 3.006E-05 | 1.742E-03 |
| ENSG00000148057 | IDNK       | 33.068  | -0.579 | 2.034E-01 | 4.787E-01 | 34.542  | 0.105  | 7.955E-01 | 9.183E-01 |
| ENSG00000100154 | TTC28      | 70.089  | -0.529 | 2.035E-01 | 4.787E-01 | 72.350  | 0.115  | 7.477E-01 | 8.951E-01 |
| ENSG00000163170 | BOLA3      | 857.994 | 0.331  | 2.055E-01 | 4.814E-01 | 603.171 | 0.830  | 3.182E-03 | 4.749E-02 |
| ENSG00000156162 | DPY19L4    | 48.352  | -0.537 | 2.057E-01 | 4.816E-01 | 52.964  | -0.331 | 3.582E-01 | 6.640E-01 |
| ENSG00000198833 | UBE2J1     | 289.694 | 0.340  | 2.069E-01 | 4.835E-01 | 226.559 | 0.683  | 9.307E-03 | 9.357E-02 |
| ENSG00000135919 | SERPINE2   | 305.585 | 0.320  | 2.084E-01 | 4.858E-01 | 338.554 | 0.954  | 1.794E-05 | 1.142E-03 |
| ENSG00000161980 | POLR3K     | 360.833 | 0.291  | 2.087E-01 | 4.861E-01 | 255.384 | 0.606  | 9.546E-03 | 9.541E-02 |
| ENSG00000107140 | TESK1      | 33.683  | -0.598 | 2.089E-01 | 4.862E-01 | 15.366  | -0.498 | 2.257E-01 | NA        |
| ENSG00000048471 | SNX29      | 54.510  | -0.520 | 2.091E-01 | 4.862E-01 | 39.622  | -0.058 | 8.829E-01 | 9.550E-01 |



|                 |              |         |        |           |           |         |        |           |           |
|-----------------|--------------|---------|--------|-----------|-----------|---------|--------|-----------|-----------|
| ENSG00000116957 | TBCE         | 231.737 | 0.374  | 2.097E-01 | 4.867E-01 | 170.134 | 0.550  | 4.651E-02 | 2.346E-01 |
| ENSG00000107779 | BMPRI1A      | 52.002  | -0.526 | 2.113E-01 | 4.887E-01 | 40.236  | 0.240  | 5.393E-01 | 7.874E-01 |
| ENSG00000081014 | AP4E1        | 48.225  | -0.578 | 2.128E-01 | 4.911E-01 | 48.121  | 0.318  | 4.061E-01 | 7.017E-01 |
| ENSG00000279059 | AC007485.2   | 45.933  | -0.528 | 2.128E-01 | 4.911E-01 | 48.835  | -0.322 | 3.810E-01 | 6.812E-01 |
| ENSG00000240616 | RPS6P25      | 38.044  | -0.625 | 2.141E-01 | 4.923E-01 | 24.675  | -0.411 | 3.270E-01 | 6.352E-01 |
| ENSG00000148824 | MTG1         | 45.349  | -0.533 | 2.155E-01 | 4.943E-01 | 40.492  | -0.367 | 3.329E-01 | 6.406E-01 |
| ENSG00000159899 | NPR2         | 48.361  | -0.524 | 2.164E-01 | 4.955E-01 | 27.464  | -0.353 | 3.903E-01 | 6.889E-01 |
| ENSG00000069345 | DNAJA2       | 728.995 | 0.357  | 2.165E-01 | 4.955E-01 | 693.750 | 0.832  | 2.247E-05 | 1.382E-03 |
| ENSG00000184669 | OR7E14P      | 68.283  | 0.490  | 2.167E-01 | 4.959E-01 | 78.800  | 0.695  | 3.476E-02 | 2.003E-01 |
| ENSG00000179979 | CRIPAK       | 34.153  | -0.607 | 2.174E-01 | 4.968E-01 | 47.787  | -0.114 | 7.579E-01 | 9.010E-01 |
| ENSG00000164209 | SLC25A46     | 66.266  | -0.653 | 2.192E-01 | 4.997E-01 | 91.150  | -0.162 | 6.336E-01 | 8.411E-01 |
| ENSG00000275234 | AC010503.4   | 33.858  | -0.597 | 2.198E-01 | 5.006E-01 | 26.776  | -0.305 | 4.547E-01 | 7.336E-01 |
| ENSG00000166925 | TSC22D4      | 42.757  | -0.589 | 2.207E-01 | 5.014E-01 | 26.011  | -0.001 | 9.973E-01 | 9.993E-01 |
| ENSG00000085978 | ATG16L1      | 193.985 | 0.340  | 2.207E-01 | 5.014E-01 | 163.122 | 0.582  | 3.853E-02 | 2.117E-01 |
| ENSG00000007255 | TRAPPC6A     | 31.868  | -0.582 | 2.210E-01 | 5.017E-01 | 39.637  | -0.392 | 2.492E-01 | 5.582E-01 |
| ENSG00000186063 | AIDA         | 39.489  | -0.580 | 2.233E-01 | 5.051E-01 | 30.316  | 0.362  | 3.734E-01 | 6.761E-01 |
| ENSG00000156232 | WHAMM        | 189.600 | 0.381  | 2.243E-01 | 5.063E-01 | 194.070 | 0.556  | 2.538E-02 | 1.685E-01 |
| ENSG00000270172 | RP5-1024G6.8 | 44.798  | -0.567 | 2.255E-01 | 5.077E-01 | 33.542  | -0.046 | 9.071E-01 | 9.656E-01 |
| ENSG00000198040 | ZNF84        | 62.682  | -0.574 | 2.262E-01 | 5.085E-01 | 62.371  | -0.155 | 6.612E-01 | 8.536E-01 |
| ENSG00000120306 | CYSTM1       | 141.079 | 0.428  | 2.267E-01 | 5.091E-01 | 353.350 | 0.847  | 2.003E-03 | 3.462E-02 |
| ENSG00000091651 | ORC6         | 334.906 | 0.367  | 2.268E-01 | 5.093E-01 | 238.194 | 0.632  | 9.131E-03 | 9.207E-02 |
| ENSG00000259429 | UBE2Q2P2     | 29.168  | 0.586  | 2.277E-01 | 5.106E-01 | 37.813  | 0.916  | 2.905E-02 | 1.811E-01 |
| ENSG00000132623 | ANKEF1       | 31.275  | -0.629 | 2.287E-01 | 5.114E-01 | 26.065  | -0.775 | 6.019E-02 | 2.700E-01 |
| ENSG00000184307 | ZDHHC23      | 43.488  | -0.563 | 2.291E-01 | 5.117E-01 | 43.136  | -0.207 | 5.886E-01 | 8.153E-01 |
| ENSG00000165689 | SDCCAG3      | 263.967 | -0.392 | 2.291E-01 | 5.117E-01 | 391.143 | 0.545  | 1.013E-02 | 9.810E-02 |
| ENSG00000137075 | RNF38        | 79.944  | 0.418  | 2.295E-01 | 5.118E-01 | 106.553 | 0.844  | 4.642E-03 | 6.100E-02 |

|                 |            |          |        |           |           |          |        |           |           |
|-----------------|------------|----------|--------|-----------|-----------|----------|--------|-----------|-----------|
| ENSG00000136943 | CTSV       | 46.307   | -0.603 | 2.296E-01 | 5.120E-01 | 12.570   | 0.292  | 4.803E-01 | NA        |
| ENSG00000140743 | CDR2       | 252.248  | 0.413  | 2.303E-01 | 5.128E-01 | 266.181  | 0.934  | 7.243E-04 | 1.827E-02 |
| ENSG00000186908 | ZDHHHC17   | 83.207   | 0.409  | 2.308E-01 | 5.133E-01 | 71.696   | 0.755  | 2.616E-02 | 1.713E-01 |
| ENSG00000155975 | VPS37A     | 138.468  | 0.472  | 2.313E-01 | 5.140E-01 | 114.621  | 1.083  | 1.414E-03 | 2.741E-02 |
| ENSG00000164291 | ARSK       | 52.942   | -0.516 | 2.316E-01 | 5.145E-01 | 46.327   | 0.123  | 7.423E-01 | 8.930E-01 |
| ENSG00000152332 | UHKM1      | 153.647  | 0.381  | 2.321E-01 | 5.151E-01 | 182.360  | 0.587  | 2.275E-02 | 1.588E-01 |
| ENSG00000174365 | SNHG11     | 265.842  | 0.303  | 2.326E-01 | 5.155E-01 | 253.045  | 0.682  | 1.173E-02 | 1.074E-01 |
| ENSG00000054598 | FOXC1      | 199.891  | 0.436  | 2.334E-01 | 5.160E-01 | 236.648  | 0.669  | 1.025E-02 | 9.847E-02 |
| ENSG00000198912 | C1orf174   | 180.044  | 0.499  | 2.346E-01 | 5.173E-01 | 85.692   | 0.700  | 7.619E-02 | 3.039E-01 |
| ENSG00000204315 | FKBPL      | 32.642   | -0.559 | 2.361E-01 | 5.190E-01 | 30.583   | -0.378 | 3.643E-01 | 6.690E-01 |
| ENSG00000178105 | DDX10      | 632.072  | 0.334  | 2.377E-01 | 5.215E-01 | 510.425  | 0.694  | 1.306E-03 | 2.611E-02 |
| ENSG00000075188 | NUP37      | 249.170  | -0.409 | 2.389E-01 | 5.225E-01 | 171.439  | 0.541  | 6.088E-02 | 2.719E-01 |
| ENSG00000074842 | MYDGF      | 1638.703 | 0.227  | 2.389E-01 | 5.225E-01 | 1101.915 | 0.503  | 6.605E-03 | 7.511E-02 |
| ENSG00000104299 | INTS9      | 53.922   | -0.518 | 2.424E-01 | 5.272E-01 | 30.186   | -0.136 | 7.448E-01 | 8.937E-01 |
| ENSG00000176142 | TMEM39A    | 176.478  | 0.357  | 2.424E-01 | 5.272E-01 | 175.365  | 0.678  | 9.154E-03 | 9.221E-02 |
| ENSG00000245556 | SCAMP1-AS1 | 41.592   | -0.520 | 2.431E-01 | 5.283E-01 | 41.999   | -0.129 | 7.325E-01 | 8.888E-01 |
| ENSG00000091009 | RBM27      | 208.095  | 0.385  | 2.444E-01 | 5.297E-01 | 199.292  | 0.866  | 1.063E-03 | 2.363E-02 |
| ENSG00000090581 | GNPTG      | 100.405  | 0.489  | 2.452E-01 | 5.307E-01 | 76.560   | 0.935  | 7.025E-03 | 7.795E-02 |
| ENSG00000132522 | GPS2       | 111.554  | 0.429  | 2.455E-01 | 5.310E-01 | 132.919  | 0.730  | 1.600E-02 | 1.295E-01 |
| ENSG00000123268 | ATF1       | 162.339  | 0.349  | 2.472E-01 | 5.329E-01 | 130.615  | 0.758  | 1.981E-02 | 1.479E-01 |
| ENSG00000156973 | PDE6D      | 32.528   | -0.574 | 2.480E-01 | 5.332E-01 | 45.584   | -0.487 | 2.160E-01 | 5.213E-01 |
| ENSG00000100379 | KCTD17     | 73.388   | -0.510 | 2.485E-01 | 5.336E-01 | 56.266   | -0.476 | 2.111E-01 | 5.142E-01 |
| ENSG00000198901 | PRC1       | 529.588  | -0.258 | 2.498E-01 | 5.354E-01 | 699.665  | 0.571  | 1.304E-02 | 1.146E-01 |
| ENSG00000124222 | STX16      | 457.682  | 0.291  | 2.497E-01 | 5.354E-01 | 530.721  | 0.510  | 1.664E-02 | 1.322E-01 |
| ENSG00000138621 | PPCDC      | 67.632   | 0.438  | 2.503E-01 | 5.359E-01 | 37.850   | 0.931  | 1.694E-02 | 1.334E-01 |
| ENSG00000168060 | NAALADL1   | 32.351   | -0.600 | 2.516E-01 | 5.378E-01 | 18.501   | -0.729 | 8.099E-02 | NA        |

|                 |            |         |        |           |           |         |        |           |           |
|-----------------|------------|---------|--------|-----------|-----------|---------|--------|-----------|-----------|
| ENSG00000240771 | ARHGEF25   | 63.931  | -0.523 | 2.525E-01 | 5.388E-01 | 61.489  | -0.080 | 8.333E-01 | 9.345E-01 |
| ENSG00000145041 | DCAF1      | 151.504 | -0.425 | 2.526E-01 | 5.388E-01 | 116.706 | 0.662  | 5.970E-02 | 2.691E-01 |
| ENSG00000106853 | PTGR1      | 248.764 | 0.337  | 2.531E-01 | 5.394E-01 | 134.731 | 0.961  | 2.004E-03 | 3.462E-02 |
| ENSG00000137806 | NDUFAF1    | 50.335  | -0.552 | 2.535E-01 | 5.400E-01 | 52.407  | 0.164  | 6.542E-01 | 8.507E-01 |
| ENSG00000076864 | RAP1GAP    | 91.394  | 0.415  | 2.536E-01 | 5.400E-01 | 75.876  | 0.685  | 6.284E-02 | 2.750E-01 |
| ENSG00000103222 | ABCC1      | 144.427 | 0.426  | 2.537E-01 | 5.402E-01 | 94.503  | 0.546  | 1.036E-01 | 3.602E-01 |
| ENSG00000157107 | FCHO2      | 53.671  | 0.477  | 2.545E-01 | 5.415E-01 | 52.231  | 1.035  | 5.680E-03 | 6.885E-02 |
| ENSG00000272277 | AL031963.3 | 31.175  | -0.521 | 2.550E-01 | 5.421E-01 | 22.966  | 0.152  | 7.175E-01 | 8.827E-01 |
| ENSG00000007372 | PAX6       | 22.077  | 0.590  | 2.561E-01 | 5.434E-01 | 32.854  | 0.652  | 1.096E-01 | 3.702E-01 |
| ENSG00000155508 | CNOT8      | 216.157 | 0.306  | 2.565E-01 | 5.440E-01 | 161.886 | 0.843  | 3.706E-03 | 5.266E-02 |
| ENSG00000173409 | ARV1       | 41.701  | -0.538 | 2.595E-01 | 5.469E-01 | 47.618  | 0.011  | 9.773E-01 | 9.909E-01 |
| ENSG00000166886 | NAB2       | 68.169  | 0.454  | 2.598E-01 | 5.474E-01 | 58.600  | 0.528  | 1.567E-01 | 4.470E-01 |
| ENSG00000186871 | ERCC6L     | 33.431  | -0.539 | 2.629E-01 | 5.507E-01 | 32.186  | -0.135 | 7.306E-01 | 8.886E-01 |
| ENSG00000156795 | WDYHV1     | 55.422  | 0.440  | 2.630E-01 | 5.508E-01 | 42.054  | 0.919  | 1.708E-02 | 1.340E-01 |
| ENSG00000169955 | ZNF747     | 45.920  | -0.502 | 2.642E-01 | 5.526E-01 | 58.564  | -0.430 | 2.566E-01 | 5.668E-01 |
| ENSG00000089876 | DHX32      | 38.083  | -0.531 | 2.665E-01 | 5.555E-01 | 37.383  | 0.276  | 4.904E-01 | 7.553E-01 |
| ENSG00000177034 | MTX3       | 55.099  | 0.481  | 2.669E-01 | 5.557E-01 | 43.755  | 0.856  | 2.972E-02 | 1.829E-01 |
| ENSG00000235194 | PPP1R3E    | 57.544  | -0.501 | 2.675E-01 | 5.561E-01 | 101.228 | -0.130 | 6.707E-01 | 8.581E-01 |
| ENSG00000214367 | HAUS3      | 76.192  | 0.445  | 2.678E-01 | 5.565E-01 | 59.460  | 0.920  | 1.440E-02 | 1.209E-01 |
| ENSG00000040199 | PHLPP2     | 43.496  | -0.476 | 2.685E-01 | 5.573E-01 | 38.828  | 0.605  | 1.158E-01 | 3.816E-01 |
| ENSG00000168394 | TAP1       | 120.833 | 0.388  | 2.691E-01 | 5.578E-01 | 188.090 | 0.633  | 1.899E-02 | 1.440E-01 |
| ENSG00000213598 | AL049873.1 | 42.811  | 0.497  | 2.692E-01 | 5.578E-01 | 44.653  | 0.520  | 1.820E-01 | 4.805E-01 |
| ENSG00000169740 | ZNF32      | 41.882  | -0.538 | 2.700E-01 | 5.588E-01 | 23.599  | -0.623 | 1.290E-01 | 4.049E-01 |
| ENSG00000172345 | STARD5     | 30.512  | -0.509 | 2.716E-01 | 5.601E-01 | 33.991  | 0.869  | 3.196E-02 | 1.909E-01 |
| ENSG00000181031 | RPH3AL     | 34.960  | -0.509 | 2.716E-01 | 5.601E-01 | 33.714  | 0.038  | 9.234E-01 | 9.719E-01 |
| ENSG00000115641 | FHL2       | 66.098  | 0.465  | 2.721E-01 | 5.607E-01 | 57.455  | 0.647  | 6.095E-02 | 2.720E-01 |

|                 |          |          |        |           |           |          |        |           |           |
|-----------------|----------|----------|--------|-----------|-----------|----------|--------|-----------|-----------|
| ENSG00000221944 | TIGD1    | 44.930   | -0.530 | 2.730E-01 | 5.617E-01 | 49.015   | -0.349 | 3.475E-01 | 6.535E-01 |
| ENSG00000100567 | PSMA3    | 787.142  | 0.333  | 2.732E-01 | 5.617E-01 | 565.008  | 0.561  | 1.131E-02 | 1.049E-01 |
| ENSG00000166199 | ALKBH3   | 293.216  | 0.330  | 2.734E-01 | 5.619E-01 | 320.489  | 0.528  | 1.384E-02 | 1.183E-01 |
| ENSG00000236810 | ELOA-AS1 | 31.501   | -0.545 | 2.740E-01 | 5.623E-01 | 46.221   | 0.444  | 2.445E-01 | 5.531E-01 |
| ENSG00000141428 | C18orf21 | 90.773   | 0.435  | 2.740E-01 | 5.623E-01 | 83.550   | 0.871  | 1.574E-02 | 1.284E-01 |
| ENSG00000179454 | KLHL28   | 58.147   | 0.436  | 2.740E-01 | 5.623E-01 | 46.523   | 0.628  | 8.303E-02 | 3.185E-01 |
| ENSG00000121690 | DEPDC7   | 68.647   | 0.495  | 2.744E-01 | 5.626E-01 | 55.596   | 1.168  | 3.136E-03 | 4.702E-02 |
| ENSG00000151929 | BAG3     | 208.716  | 0.354  | 2.762E-01 | 5.647E-01 | 153.427  | 0.782  | 6.735E-03 | 7.592E-02 |
| ENSG00000164306 | PRIMPOL  | 31.822   | -0.508 | 2.768E-01 | 5.652E-01 | 43.750   | -0.290 | 4.691E-01 | 7.443E-01 |
| ENSG00000163608 | NEPRO    | 231.443  | 0.297  | 2.768E-01 | 5.652E-01 | 249.899  | 0.638  | 5.563E-03 | 6.799E-02 |
| ENSG00000158480 | SPATA2   | 309.570  | 0.335  | 2.778E-01 | 5.661E-01 | 211.363  | 0.535  | 4.479E-02 | 2.297E-01 |
| ENSG00000157110 | RBPMS    | 595.599  | 0.312  | 2.798E-01 | 5.687E-01 | 451.702  | 0.518  | 1.563E-02 | 1.278E-01 |
| ENSG00000106635 | BCL7B    | 95.958   | 0.453  | 2.805E-01 | 5.691E-01 | 93.464   | 0.745  | 3.489E-02 | 2.006E-01 |
| ENSG00000174109 | C16orf91 | 60.044   | 0.493  | 2.826E-01 | 5.710E-01 | 60.554   | 0.757  | 6.407E-02 | 2.782E-01 |
| ENSG00000130787 | HIP1R    | 29.749   | 0.514  | 2.826E-01 | 5.710E-01 | 31.484   | 1.112  | 5.967E-03 | 7.083E-02 |
| ENSG00000169131 | ZNF354A  | 26.479   | 0.527  | 2.830E-01 | 5.715E-01 | 34.743   | 0.817  | 3.715E-02 | 2.072E-01 |
| ENSG00000120963 | ZNF706   | 197.246  | 0.413  | 2.852E-01 | 5.742E-01 | 187.391  | 0.760  | 1.599E-02 | 1.295E-01 |
| ENSG00000107443 | CCNJ     | 85.144   | 0.435  | 2.866E-01 | 5.756E-01 | 135.385  | 0.533  | 5.726E-02 | 2.624E-01 |
| ENSG00000152520 | PAN3     | 67.005   | 0.421  | 2.878E-01 | 5.767E-01 | 92.271   | 0.841  | 9.384E-03 | 9.407E-02 |
| ENSG00000154059 | IMPACT   | 75.197   | 0.391  | 2.884E-01 | 5.771E-01 | 68.052   | 0.718  | 2.963E-02 | 1.825E-01 |
| ENSG00000120265 | PCMT1    | 1361.603 | 0.223  | 2.905E-01 | 5.791E-01 | 1002.720 | 0.521  | 3.549E-03 | 5.120E-02 |
| ENSG00000115364 | MRPL19   | 366.529  | -0.301 | 2.909E-01 | 5.794E-01 | 328.963  | 0.647  | 1.651E-02 | 1.314E-01 |
| ENSG00000121481 | RNF2     | 81.432   | 0.414  | 2.927E-01 | 5.811E-01 | 75.642   | 0.698  | 3.461E-02 | 2.001E-01 |
| ENSG00000248909 | HMGB1P21 | 44.277   | 0.480  | 2.953E-01 | 5.842E-01 | 46.962   | 0.839  | 2.653E-02 | 1.717E-01 |
| ENSG00000154889 | MPPE1    | 44.435   | 0.479  | 2.977E-01 | 5.869E-01 | 39.450   | 0.519  | 1.974E-01 | 4.986E-01 |
| ENSG00000157796 | WDR19    | 35.139   | -0.531 | 3.041E-01 | 5.939E-01 | 42.022   | -0.074 | 8.449E-01 | 9.404E-01 |

|                 |           |          |        |           |           |         |        |           |           |
|-----------------|-----------|----------|--------|-----------|-----------|---------|--------|-----------|-----------|
| ENSG00000106993 | CDC37L1   | 191.845  | 0.287  | 3.044E-01 | 5.940E-01 | 159.008 | 0.800  | 6.001E-03 | 7.099E-02 |
| ENSG00000254911 | SCARNA9   | 276.005  | -0.533 | 3.055E-01 | 5.953E-01 | 224.200 | -0.267 | 2.936E-01 | 6.034E-01 |
| ENSG00000037637 | FBXO42    | 59.527   | 0.422  | 3.057E-01 | 5.954E-01 | 78.077  | 0.539  | 1.035E-01 | 3.602E-01 |
| ENSG00000114784 | EIF1B     | 329.796  | 0.311  | 3.119E-01 | 6.017E-01 | 335.115 | 0.690  | 4.112E-03 | 5.648E-02 |
| ENSG00000132950 | ZMYM5     | 51.815   | 0.411  | 3.147E-01 | 6.045E-01 | 33.440  | 0.607  | 1.285E-01 | 4.041E-01 |
| ENSG00000124209 | RAB22A    | 229.363  | 0.286  | 3.154E-01 | 6.052E-01 | 245.254 | 0.581  | 1.904E-02 | 1.441E-01 |
| ENSG00000111832 | RWDD1     | 996.171  | 0.249  | 3.172E-01 | 6.066E-01 | 923.212 | 0.528  | 1.356E-02 | 1.171E-01 |
| ENSG00000042429 | MED17     | 128.801  | 0.311  | 3.179E-01 | 6.070E-01 | 101.821 | 0.588  | 4.969E-02 | 2.421E-01 |
| ENSG00000155744 | FAM126B   | 194.792  | 0.273  | 3.188E-01 | 6.080E-01 | 127.009 | 0.813  | 5.174E-03 | 6.535E-02 |
| ENSG00000080822 | CLDND1    | 89.198   | 0.424  | 3.191E-01 | 6.083E-01 | 59.723  | 1.224  | 5.678E-04 | 1.541E-02 |
| ENSG00000198799 | LRIG2     | 51.454   | 0.411  | 3.199E-01 | 6.092E-01 | 39.102  | 0.554  | 1.758E-01 | 4.715E-01 |
| ENSG00000166188 | ZNF319    | 34.483   | -0.509 | 3.212E-01 | 6.111E-01 | 38.043  | -0.292 | 4.649E-01 | 7.416E-01 |
| ENSG00000134569 | LRP4      | 42.318   | -0.460 | 3.227E-01 | 6.127E-01 | 64.302  | 0.500  | 1.706E-01 | 4.655E-01 |
| ENSG00000186352 | ANKRD37   | 31.621   | -0.514 | 3.268E-01 | 6.163E-01 | 18.434  | 0.246  | 5.569E-01 | NA        |
| ENSG00000010017 | RANBP9    | 144.362  | 0.420  | 3.287E-01 | 6.175E-01 | 119.572 | 0.846  | 1.644E-02 | 1.313E-01 |
| ENSG00000116954 | RRAGC     | 57.638   | 0.405  | 3.295E-01 | 6.179E-01 | 48.504  | 0.806  | 3.484E-02 | 2.006E-01 |
| ENSG00000100612 | DHRS7     | 147.104  | 0.367  | 3.303E-01 | 6.187E-01 | 133.388 | 0.646  | 5.753E-02 | 2.629E-01 |
| ENSG00000203791 | EEF1AKMT2 | 85.590   | -0.354 | 3.312E-01 | 6.195E-01 | 52.009  | 0.531  | 1.549E-01 | 4.433E-01 |
| ENSG00000189227 | C15orf61  | 270.987  | 0.271  | 3.319E-01 | 6.203E-01 | 216.771 | 0.602  | 1.679E-02 | 1.328E-01 |
| ENSG00000134758 | RNF138    | 123.766  | 0.429  | 3.325E-01 | 6.205E-01 | 77.129  | 1.174  | 8.729E-04 | 2.084E-02 |
| ENSG00000028528 | SNX1      | 546.219  | -0.258 | 3.341E-01 | 6.223E-01 | 384.531 | 0.657  | 2.540E-02 | 1.685E-01 |
| ENSG00000152256 | PDK1      | 142.117  | -0.311 | 3.354E-01 | 6.226E-01 | 129.924 | 0.874  | 3.418E-03 | 4.972E-02 |
| ENSG00000225470 | JPX       | 250.822  | 0.264  | 3.347E-01 | 6.226E-01 | 193.777 | 0.552  | 3.884E-02 | 2.127E-01 |
| ENSG00000008394 | MGST1     | 1118.340 | 0.288  | 3.359E-01 | 6.229E-01 | 586.403 | 0.740  | 3.593E-03 | 5.132E-02 |
| ENSG00000144744 | UBA3      | 81.225   | -0.375 | 3.370E-01 | 6.238E-01 | 81.118  | 0.715  | 3.873E-02 | 2.124E-01 |
| ENSG00000153037 | SRP19     | 202.925  | 0.394  | 3.388E-01 | 6.259E-01 | 122.331 | 0.553  | 8.794E-02 | 3.287E-01 |

|                 |         |         |        |           |           |         |       |           |           |
|-----------------|---------|---------|--------|-----------|-----------|---------|-------|-----------|-----------|
| ENSG00000145337 | PYURF   | 280.566 | 0.298  | 3.429E-01 | 6.293E-01 | 251.050 | 0.530 | 2.616E-02 | 1.713E-01 |
| ENSG00000074935 | TUBE1   | 38.788  | 0.436  | 3.449E-01 | 6.312E-01 | 46.888  | 1.019 | 7.580E-03 | 8.187E-02 |
| ENSG00000213339 | QTRT1   | 74.834  | 0.366  | 3.470E-01 | 6.329E-01 | 70.320  | 0.550 | 1.494E-01 | 4.367E-01 |
| ENSG00000101367 | MAPRE1  | 996.242 | 0.297  | 3.476E-01 | 6.334E-01 | 745.733 | 0.529 | 1.150E-02 | 1.058E-01 |
| ENSG00000143862 | ARL8A   | 355.687 | 0.292  | 3.483E-01 | 6.338E-01 | 508.614 | 0.779 | 4.136E-04 | 1.240E-02 |
| ENSG00000011198 | ABHD5   | 40.423  | 0.419  | 3.490E-01 | 6.338E-01 | 35.743  | 0.639 | 1.094E-01 | 3.701E-01 |
| ENSG00000164105 | SAP30   | 83.957  | 0.333  | 3.518E-01 | 6.355E-01 | 98.263  | 0.691 | 2.639E-02 | 1.714E-01 |
| ENSG00000166908 | PIP4K2C | 318.629 | -0.307 | 3.519E-01 | 6.355E-01 | 213.609 | 0.549 | 4.946E-02 | 2.417E-01 |
| ENSG00000205250 | E2F4    | 355.882 | 0.343  | 3.526E-01 | 6.363E-01 | 279.432 | 0.510 | 3.358E-02 | 1.964E-01 |
| ENSG00000196437 | ZNF569  | 51.052  | 0.391  | 3.544E-01 | 6.383E-01 | 35.427  | 0.558 | 1.645E-01 | 4.567E-01 |
| ENSG00000151239 | TWF1    | 64.523  | 0.388  | 3.573E-01 | 6.410E-01 | 76.978  | 0.760 | 4.009E-02 | 2.167E-01 |
| ENSG00000136940 | PDCL    | 134.139 | 0.313  | 3.589E-01 | 6.421E-01 | 124.611 | 0.832 | 6.908E-03 | 7.739E-02 |
| ENSG00000013561 | RNF14   | 118.040 | 0.341  | 3.598E-01 | 6.433E-01 | 103.997 | 0.663 | 7.017E-02 | 2.899E-01 |
| ENSG00000146574 | CCZ1B   | 94.722  | -0.373 | 3.616E-01 | 6.449E-01 | 81.948  | 0.625 | 8.437E-02 | 3.212E-01 |
| ENSG00000164916 | FOXK1   | 331.542 | 0.230  | 3.674E-01 | 6.512E-01 | 186.755 | 0.945 | 1.611E-03 | 2.983E-02 |
| ENSG00000244687 | UBE2V1  | 44.173  | 0.384  | 3.723E-01 | 6.564E-01 | 40.784  | 0.944 | 1.611E-02 | 1.300E-01 |
| ENSG00000087842 | PIR     | 177.896 | 0.303  | 3.731E-01 | 6.571E-01 | 179.200 | 0.569 | 2.627E-02 | 1.714E-01 |
| ENSG00000138802 | SEC24B  | 95.853  | 0.322  | 3.748E-01 | 6.586E-01 | 104.220 | 0.602 | 7.288E-02 | 2.959E-01 |
| ENSG00000153179 | RASSF3  | 218.204 | 0.341  | 3.747E-01 | 6.586E-01 | 82.668  | 0.816 | 4.146E-02 | 2.204E-01 |
| ENSG00000104671 | DCTN6   | 116.429 | 0.325  | 3.814E-01 | 6.641E-01 | 105.105 | 0.864 | 1.390E-02 | 1.187E-01 |
| ENSG00000110925 | CSRNP2  | 55.801  | 0.343  | 3.820E-01 | 6.649E-01 | 39.122  | 0.787 | 5.713E-02 | 2.622E-01 |
| ENSG00000064726 | BTBD1   | 46.925  | 0.366  | 3.823E-01 | 6.649E-01 | 40.188  | 0.684 | 9.433E-02 | 3.406E-01 |
| ENSG00000092871 | RFFL    | 224.578 | 0.240  | 3.844E-01 | 6.664E-01 | 152.627 | 0.619 | 2.273E-02 | 1.588E-01 |
| ENSG00000274211 | SOCS7   | 553.787 | -0.226 | 3.870E-01 | 6.686E-01 | 441.703 | 0.538 | 2.874E-02 | 1.799E-01 |
| ENSG00000223802 | CERS1   | 80.240  | 0.343  | 3.874E-01 | 6.688E-01 | 32.207  | 0.674 | 8.768E-02 | 3.282E-01 |
| ENSG00000169598 | DFFB    | 95.456  | -0.456 | 3.883E-01 | 6.694E-01 | 57.992  | 0.678 | 7.450E-02 | 3.000E-01 |

|                 |          |         |        |           |           |         |       |           |           |
|-----------------|----------|---------|--------|-----------|-----------|---------|-------|-----------|-----------|
| ENSG00000137936 | BCAR3    | 38.395  | 0.413  | 3.904E-01 | 6.714E-01 | 53.676  | 1.158 | 1.468E-03 | 2.810E-02 |
| ENSG00000273611 | ZNHIT3   | 285.436 | 0.285  | 3.906E-01 | 6.715E-01 | 225.368 | 0.810 | 2.356E-03 | 3.851E-02 |
| ENSG00000128590 | DNAJB9   | 164.491 | 0.455  | 3.920E-01 | 6.728E-01 | 91.618  | 1.088 | 1.600E-03 | 2.979E-02 |
| ENSG00000123297 | TSFM     | 312.704 | -0.303 | 3.931E-01 | 6.740E-01 | 170.936 | 0.751 | 3.055E-02 | 1.865E-01 |
| ENSG00000123094 | RASSF8   | 27.020  | 0.444  | 3.958E-01 | 6.764E-01 | 31.865  | 0.796 | 5.777E-02 | 2.634E-01 |
| ENSG00000112592 | TBP      | 120.127 | 0.312  | 3.965E-01 | 6.768E-01 | 86.559  | 0.645 | 5.917E-02 | 2.674E-01 |
| ENSG00000078487 | ZCWPW1   | 33.164  | 0.402  | 3.985E-01 | 6.783E-01 | 38.009  | 0.671 | 9.288E-02 | 3.381E-01 |
| ENSG00000179588 | ZFPM1    | 49.737  | 0.352  | 3.990E-01 | 6.790E-01 | 45.127  | 0.529 | 1.607E-01 | 4.510E-01 |
| ENSG00000038274 | MAT2B    | 161.605 | 0.258  | 3.992E-01 | 6.791E-01 | 136.733 | 0.561 | 5.478E-02 | 2.560E-01 |
| ENSG00000163932 | PRKCD    | 79.739  | 0.345  | 4.012E-01 | 6.800E-01 | 47.373  | 0.962 | 9.982E-03 | 9.753E-02 |
| ENSG00000165792 | METTTL17 | 265.302 | 0.286  | 4.083E-01 | 6.873E-01 | 204.236 | 0.760 | 7.004E-02 | 2.898E-01 |
| ENSG00000113716 | HMGXB3   | 57.301  | 0.331  | 4.097E-01 | 6.888E-01 | 92.810  | 0.943 | 6.210E-03 | 7.246E-02 |
| ENSG00000136997 | MYC      | 280.248 | 0.428  | 4.145E-01 | 6.920E-01 | 154.411 | 1.378 | 1.251E-04 | 5.375E-03 |
| ENSG00000136122 | BORA     | 73.749  | -0.366 | 4.162E-01 | 6.923E-01 | 80.202  | 0.560 | 1.202E-01 | 3.900E-01 |
| ENSG00000115128 | SF3B6    | 437.121 | 0.247  | 4.179E-01 | 6.929E-01 | 406.885 | 0.530 | 3.520E-02 | 2.016E-01 |
| ENSG00000108010 | GLRX3    | 547.351 | 0.220  | 4.191E-01 | 6.939E-01 | 392.653 | 0.538 | 2.320E-02 | 1.606E-01 |
| ENSG00000169299 | PGM2     | 82.925  | 0.292  | 4.194E-01 | 6.941E-01 | 86.961  | 0.672 | 4.933E-02 | 2.415E-01 |
| ENSG00000132603 | NIP7     | 271.602 | 0.228  | 4.240E-01 | 6.968E-01 | 212.080 | 0.528 | 4.239E-02 | 2.227E-01 |
| ENSG00000164086 | DUSP7    | 75.809  | -0.353 | 4.286E-01 | 6.999E-01 | 39.411  | 1.521 | 9.545E-05 | 4.435E-03 |
| ENSG00000134480 | CCNH     | 152.706 | 0.420  | 4.297E-01 | 7.007E-01 | 102.509 | 1.270 | 4.047E-04 | 1.221E-02 |
| ENSG00000067167 | TRAM1    | 668.689 | 0.216  | 4.314E-01 | 7.023E-01 | 500.020 | 0.520 | 2.077E-02 | 1.514E-01 |
| ENSG00000146963 | LUC7L2   | 444.772 | 0.226  | 4.355E-01 | 7.060E-01 | 355.221 | 0.854 | 9.351E-04 | 2.168E-02 |
| ENSG00000135002 | RFK      | 301.579 | 0.234  | 4.357E-01 | 7.063E-01 | 312.172 | 0.883 | 7.172E-03 | 7.879E-02 |
| ENSG00000105186 | ANKRD27  | 145.779 | -0.270 | 4.372E-01 | 7.075E-01 | 110.785 | 0.816 | 8.277E-03 | 8.712E-02 |
| ENSG00000088298 | EDEM2    | 120.508 | -0.307 | 4.430E-01 | 7.123E-01 | 118.625 | 0.582 | 6.138E-02 | 2.727E-01 |
| ENSG00000151689 | INPP1    | 154.733 | -0.232 | 4.439E-01 | 7.128E-01 | 128.948 | 0.618 | 3.952E-02 | 2.150E-01 |

|                 |           |          |        |           |           |          |       |           |           |
|-----------------|-----------|----------|--------|-----------|-----------|----------|-------|-----------|-----------|
| ENSG00000153044 | CENPH     | 200.453  | 0.216  | 4.456E-01 | 7.140E-01 | 135.978  | 0.661 | 2.705E-02 | 1.731E-01 |
| ENSG00000165669 | FAM204A   | 150.830  | 0.219  | 4.483E-01 | 7.165E-01 | 222.738  | 0.809 | 1.204E-03 | 2.514E-02 |
| ENSG00000159658 | EFCAB14   | 187.454  | -0.233 | 4.506E-01 | 7.180E-01 | 172.066  | 0.845 | 1.707E-03 | 3.100E-02 |
| ENSG00000204899 | MZT1      | 255.290  | 0.240  | 4.634E-01 | 7.277E-01 | 156.720  | 0.892 | 4.511E-03 | 5.989E-02 |
| ENSG00000111652 | COPS7A    | 236.941  | -0.372 | 4.687E-01 | 7.316E-01 | 149.770  | 0.544 | 1.425E-01 | 4.268E-01 |
| ENSG00000114850 | SSR3      | 2465.867 | -0.156 | 4.701E-01 | 7.327E-01 | 1842.821 | 0.519 | 8.468E-03 | 8.846E-02 |
| ENSG00000130772 | MED18     | 80.237   | 0.274  | 4.736E-01 | 7.354E-01 | 79.055   | 0.543 | 9.835E-02 | 3.493E-01 |
| ENSG00000174749 | FAM241A   | 50.621   | 0.280  | 4.774E-01 | 7.386E-01 | 42.306   | 1.084 | 3.809E-03 | 5.360E-02 |
| ENSG00000111711 | GOLT1B    | 90.240   | 0.266  | 4.797E-01 | 7.405E-01 | 122.972  | 0.572 | 5.543E-02 | 2.579E-01 |
| ENSG00000143384 | MCL1      | 1545.331 | 0.188  | 4.811E-01 | 7.421E-01 | 1292.565 | 0.534 | 7.769E-03 | 8.304E-02 |
| ENSG00000101391 | CDK5RAP1  | 270.188  | 0.179  | 4.833E-01 | 7.428E-01 | 272.129  | 0.580 | 1.326E-02 | 1.155E-01 |
| ENSG00000049860 | HEXB      | 453.779  | 0.205  | 4.892E-01 | 7.471E-01 | 299.229  | 0.542 | 3.435E-02 | 1.994E-01 |
| ENSG00000138050 | THUMPD2   | 66.866   | 0.308  | 4.921E-01 | 7.491E-01 | 74.064   | 0.584 | 1.211E-01 | 3.907E-01 |
| ENSG00000116752 | BCAS2     | 191.369  | 0.224  | 4.925E-01 | 7.494E-01 | 156.550  | 0.564 | 3.717E-02 | 2.072E-01 |
| ENSG00000251022 | THAP9-AS1 | 91.970   | 0.237  | 4.985E-01 | 7.545E-01 | 78.007   | 1.325 | 1.042E-04 | 4.675E-03 |
| ENSG00000135127 | BICDL1    | 62.688   | -0.259 | 5.059E-01 | 7.600E-01 | 35.827   | 1.069 | 9.278E-03 | 9.337E-02 |
| ENSG00000163866 | SMIM12    | 185.640  | -0.232 | 5.067E-01 | 7.605E-01 | 179.419  | 0.596 | 2.172E-02 | 1.544E-01 |
| ENSG00000196116 | TDRD7     | 59.990   | -0.347 | 5.102E-01 | 7.628E-01 | 35.231   | 0.971 | 1.858E-02 | 1.420E-01 |
| ENSG00000131507 | NDFIP1    | 267.524  | 0.187  | 5.109E-01 | 7.631E-01 | 277.959  | 0.542 | 3.677E-02 | 2.063E-01 |
| ENSG00000006704 | GTF2IRD1  | 206.030  | 0.197  | 5.106E-01 | 7.631E-01 | 189.062  | 0.649 | 1.658E-02 | 1.319E-01 |
| ENSG00000145979 | TBC1D7    | 134.129  | -0.241 | 5.113E-01 | 7.631E-01 | 79.404   | 0.500 | 1.379E-01 | 4.196E-01 |
| ENSG00000173540 | GMPPB     | 84.278   | 0.236  | 5.148E-01 | 7.654E-01 | 63.179   | 0.525 | 1.384E-01 | 4.202E-01 |
| ENSG00000091483 | FH        | 393.492  | 0.215  | 5.190E-01 | 7.691E-01 | 240.930  | 0.514 | 2.195E-01 | 5.248E-01 |
| ENSG00000166860 | ZBTB39    | 84.946   | -0.235 | 5.218E-01 | 7.718E-01 | 85.158   | 0.630 | 4.156E-02 | 2.205E-01 |
| ENSG00000138750 | NUP54     | 104.710  | 0.272  | 5.242E-01 | 7.737E-01 | 102.670  | 0.570 | 1.043E-01 | 3.614E-01 |
| ENSG00000026103 | FAS       | 44.994   | 0.289  | 5.254E-01 | 7.746E-01 | 51.691   | 1.009 | 8.968E-03 | 9.125E-02 |



|                 |            |          |        |           |           |          |       |           |           |
|-----------------|------------|----------|--------|-----------|-----------|----------|-------|-----------|-----------|
| ENSG00000163874 | ZC3H12A    | 123.643  | 0.209  | 5.271E-01 | 7.759E-01 | 98.836   | 1.045 | 7.756E-04 | 1.905E-02 |
| ENSG00000198382 | UVRAG      | 229.519  | 0.185  | 5.276E-01 | 7.761E-01 | 234.442  | 0.512 | 2.955E-02 | 1.823E-01 |
| ENSG00000139517 | LNx2       | 113.992  | 0.260  | 5.291E-01 | 7.769E-01 | 122.569  | 0.698 | 2.135E-02 | 1.534E-01 |
| ENSG00000233429 | HOTAIRM1   | 30.345   | 0.287  | 5.290E-01 | 7.769E-01 | 39.516   | 0.705 | 6.510E-02 | 2.793E-01 |
| ENSG00000164687 | FABP5      | 120.277  | 0.239  | 5.302E-01 | 7.774E-01 | 92.158   | 0.519 | 1.341E-01 | 4.136E-01 |
| ENSG00000141858 | SAMD1      | 950.222  | 0.200  | 5.316E-01 | 7.784E-01 | 849.659  | 0.734 | 6.282E-04 | 1.636E-02 |
| ENSG00000141452 | RMC1       | 61.364   | -0.297 | 5.326E-01 | 7.788E-01 | 36.875   | 0.768 | 5.836E-02 | 2.651E-01 |
| ENSG00000215421 | ZNF407     | 58.785   | -0.259 | 5.329E-01 | 7.791E-01 | 55.193   | 0.546 | 1.205E-01 | 3.905E-01 |
| ENSG00000133818 | RRAS2      | 207.287  | 0.181  | 5.348E-01 | 7.800E-01 | 245.023  | 0.530 | 2.910E-02 | 1.811E-01 |
| ENSG00000101193 | GID8       | 2605.757 | 0.149  | 5.376E-01 | 7.822E-01 | 2146.548 | 0.679 | 2.783E-03 | 4.311E-02 |
| ENSG00000112511 | PHF1       | 66.283   | 0.229  | 5.381E-01 | 7.823E-01 | 50.201   | 0.842 | 2.592E-02 | 1.704E-01 |
| ENSG00000050820 | BCAR1      | 262.488  | 0.181  | 5.393E-01 | 7.827E-01 | 301.028  | 0.520 | 1.960E-02 | 1.472E-01 |
| ENSG00000130173 | ANGPTL8    | 188.569  | 0.202  | 5.455E-01 | 7.871E-01 | 105.498  | 0.889 | 1.630E-02 | 1.308E-01 |
| ENSG00000186073 | C15orf41   | 50.772   | 0.259  | 5.492E-01 | 7.885E-01 | 32.076   | 0.781 | 4.575E-02 | 2.321E-01 |
| ENSG00000118242 | MREG       | 86.163   | 0.261  | 5.515E-01 | 7.892E-01 | 57.391   | 0.740 | 3.359E-02 | 1.964E-01 |
| ENSG00000240509 | RPL34P18   | 91.192   | 0.218  | 5.526E-01 | 7.894E-01 | 44.749   | 0.784 | 4.035E-02 | 2.176E-01 |
| ENSG00000124688 | MAD2L1BP   | 152.338  | 0.313  | 5.556E-01 | 7.895E-01 | 81.627   | 0.856 | 2.746E-02 | 1.743E-01 |
| ENSG00000162972 | MAIP1      | 185.834  | 0.222  | 5.559E-01 | 7.897E-01 | 113.795  | 0.792 | 1.314E-02 | 1.150E-01 |
| ENSG00000244038 | DDOST      | 524.350  | 0.136  | 5.596E-01 | 7.924E-01 | 458.276  | 0.539 | 2.640E-02 | 1.714E-01 |
| ENSG00000198074 | AKR1B10    | 166.583  | -0.246 | 5.624E-01 | 7.936E-01 | 62.084   | 1.149 | 4.294E-03 | 5.820E-02 |
| ENSG00000115170 | ACVR1      | 54.998   | 0.268  | 5.656E-01 | 7.952E-01 | 75.465   | 0.825 | 1.394E-02 | 1.188E-01 |
| ENSG00000172954 | LCLAT1     | 162.750  | 0.169  | 5.674E-01 | 7.960E-01 | 106.670  | 0.759 | 1.436E-02 | 1.209E-01 |
| ENSG00000115163 | CENPA      | 299.678  | 0.146  | 5.684E-01 | 7.967E-01 | 149.258  | 0.795 | 6.612E-03 | 7.511E-02 |
| ENSG00000168275 | COA6       | 314.885  | 0.281  | 5.700E-01 | 7.980E-01 | 214.537  | 0.804 | 3.789E-03 | 5.353E-02 |
| ENSG00000231940 | RPS7P3     | 66.577   | 0.227  | 5.741E-01 | 8.004E-01 | 34.667   | 0.702 | 7.721E-02 | 3.057E-01 |
| ENSG00000237190 | CDKN2AIPNL | 154.480  | 0.194  | 5.749E-01 | 8.005E-01 | 114.459  | 0.543 | 1.040E-01 | 3.609E-01 |

|                 |            |          |        |           |           |         |       |           |           |
|-----------------|------------|----------|--------|-----------|-----------|---------|-------|-----------|-----------|
| ENSG00000152382 | TADA1      | 145.021  | 0.166  | 5.814E-01 | 8.042E-01 | 100.600 | 0.602 | 4.253E-02 | 2.229E-01 |
| ENSG00000071282 | LMCD1      | 26.783   | -0.277 | 5.823E-01 | 8.047E-01 | 74.965  | 0.549 | 9.221E-02 | 3.372E-01 |
| ENSG00000214087 | ARL16      | 55.170   | 0.241  | 5.823E-01 | 8.047E-01 | 43.957  | 1.062 | 6.102E-03 | 7.178E-02 |
| ENSG00000255529 | POLR2M     | 120.330  | 0.201  | 5.827E-01 | 8.051E-01 | 97.110  | 0.520 | 1.210E-01 | 3.906E-01 |
| ENSG00000126249 | PDCD2L     | 164.370  | 0.197  | 5.842E-01 | 8.060E-01 | 135.946 | 1.169 | 7.363E-04 | 1.843E-02 |
| ENSG00000186481 | ANKRD20A5P | 16.011   | 0.281  | 5.868E-01 | 8.077E-01 | 47.151  | 0.597 | 1.120E-01 | 3.741E-01 |
| ENSG00000196636 | SDHAF3     | 45.848   | 0.254  | 5.927E-01 | 8.119E-01 | 48.586  | 0.644 | 7.369E-02 | 2.983E-01 |
| ENSG00000149564 | ESAM       | 63.357   | 0.230  | 5.928E-01 | 8.120E-01 | 42.654  | 0.838 | 3.141E-02 | 1.891E-01 |
| ENSG00000189143 | CLDN4      | 253.824  | 0.137  | 5.963E-01 | 8.142E-01 | 220.036 | 0.837 | 9.395E-04 | 2.172E-02 |
| ENSG00000132432 | SEC61G     | 1178.736 | 0.243  | 5.963E-01 | 8.142E-01 | 907.129 | 0.950 | 6.970E-06 | 5.063E-04 |
| ENSG00000181722 | ZBTB20     | 77.703   | 0.191  | 5.988E-01 | 8.157E-01 | 153.617 | 0.525 | 6.373E-02 | 2.773E-01 |
| ENSG00000131876 | SNRPA1     | 141.899  | 0.184  | 6.019E-01 | 8.184E-01 | 115.292 | 0.781 | 8.905E-03 | 9.112E-02 |
| ENSG00000203883 | SOX18      | 52.542   | 0.234  | 6.026E-01 | 8.184E-01 | 34.199  | 0.589 | 1.575E-01 | 4.479E-01 |
| ENSG00000233971 | RPS20P10   | 22.986   | 0.256  | 6.042E-01 | 8.192E-01 | 36.377  | 0.632 | 1.134E-01 | 3.767E-01 |
| ENSG00000166889 | PATL1      | 311.899  | -0.161 | 6.050E-01 | 8.197E-01 | 295.469 | 0.972 | 2.325E-04 | 8.299E-03 |
| ENSG00000231312 | AC007388.1 | 110.720  | -0.201 | 6.051E-01 | 8.197E-01 | 100.720 | 0.698 | 3.236E-02 | 1.922E-01 |
| ENSG00000179051 | RCC2       | 826.713  | 0.273  | 6.055E-01 | 8.200E-01 | 264.629 | 0.680 | 3.971E-02 | 2.156E-01 |
| ENSG00000137575 | SDCBP      | 354.052  | -0.169 | 6.074E-01 | 8.205E-01 | 338.513 | 0.693 | 2.667E-02 | 1.721E-01 |
| ENSG00000168538 | TRAPPC11   | 68.996   | 0.198  | 6.212E-01 | 8.290E-01 | 80.975  | 0.546 | 8.253E-02 | 3.178E-01 |
| ENSG00000198855 | FICD       | 77.375   | -0.181 | 6.244E-01 | 8.305E-01 | 53.439  | 0.594 | 9.975E-02 | 3.526E-01 |
| ENSG00000120526 | NUDCD1     | 112.645  | 0.193  | 6.250E-01 | 8.309E-01 | 91.256  | 0.508 | 9.202E-02 | 3.369E-01 |
| ENSG00000153391 | INO80C     | 67.135   | 0.208  | 6.285E-01 | 8.324E-01 | 66.997  | 0.926 | 8.773E-03 | 9.041E-02 |
| ENSG00000101413 | RPRD1B     | 319.010  | 0.128  | 6.297E-01 | 8.331E-01 | 225.682 | 0.553 | 2.484E-02 | 1.668E-01 |
| ENSG00000203485 | INF2       | 112.884  | 0.174  | 6.394E-01 | 8.389E-01 | 86.886  | 0.716 | 2.441E-02 | 1.656E-01 |
| ENSG00000157214 | STEAP2     | 86.526   | -0.172 | 6.401E-01 | 8.394E-01 | 73.645  | 0.535 | 1.057E-01 | 3.631E-01 |
| ENSG00000023318 | ERP44      | 355.081  | 0.151  | 6.411E-01 | 8.399E-01 | 256.559 | 0.518 | 5.659E-02 | 2.605E-01 |

|                 |           |          |        |           |           |          |       |           |           |
|-----------------|-----------|----------|--------|-----------|-----------|----------|-------|-----------|-----------|
| ENSG00000115233 | PSMD14    | 507.343  | 0.113  | 6.431E-01 | 8.409E-01 | 506.679  | 0.651 | 1.386E-03 | 2.708E-02 |
| ENSG00000130147 | SH3BP4    | 632.810  | 0.120  | 6.439E-01 | 8.412E-01 | 427.275  | 0.563 | 1.325E-02 | 1.155E-01 |
| ENSG00000185269 | NOTUM     | 590.526  | 0.243  | 6.453E-01 | 8.414E-01 | 386.892  | 0.750 | 7.295E-02 | 2.959E-01 |
| ENSG00000134419 | RPS15A    | 6558.310 | 0.131  | 6.470E-01 | 8.421E-01 | 6136.382 | 0.521 | 2.658E-03 | 4.173E-02 |
| ENSG00000164828 | SUN1      | 281.299  | -0.121 | 6.503E-01 | 8.441E-01 | 191.010  | 0.723 | 5.828E-03 | 6.970E-02 |
| ENSG00000150787 | PTS       | 128.380  | 0.164  | 6.508E-01 | 8.445E-01 | 91.974   | 1.134 | 1.678E-03 | 3.058E-02 |
| ENSG00000137767 | SQOR      | 132.451  | 0.139  | 6.552E-01 | 8.466E-01 | 105.090  | 0.601 | 6.475E-02 | 2.787E-01 |
| ENSG00000163374 | YY1AP1    | 219.735  | 0.114  | 6.559E-01 | 8.470E-01 | 261.366  | 0.603 | 1.008E-02 | 9.784E-02 |
| ENSG00000227036 | LINC00511 | 116.301  | 0.138  | 6.562E-01 | 8.471E-01 | 165.818  | 0.605 | 1.924E-02 | 1.452E-01 |
| ENSG00000129657 | SEC14L1   | 374.058  | -0.134 | 6.591E-01 | 8.480E-01 | 307.357  | 0.514 | 4.039E-02 | 2.177E-01 |
| ENSG00000073712 | FERMT2    | 840.832  | 0.104  | 6.597E-01 | 8.484E-01 | 512.105  | 0.681 | 1.418E-03 | 2.744E-02 |
| ENSG00000182117 | NOP10     | 1008.283 | 0.111  | 6.602E-01 | 8.484E-01 | 929.129  | 0.650 | 2.836E-03 | 4.365E-02 |
| ENSG00000112242 | E2F3      | 491.708  | 0.103  | 6.619E-01 | 8.492E-01 | 341.040  | 0.527 | 2.471E-02 | 1.666E-01 |
| ENSG00000110218 | PANX1     | 71.173   | 0.173  | 6.659E-01 | 8.515E-01 | 83.036   | 0.794 | 2.776E-02 | 1.754E-01 |
| ENSG00000076053 | RBM7      | 66.926   | 0.181  | 6.672E-01 | 8.520E-01 | 52.637   | 0.511 | 1.597E-01 | 4.505E-01 |
| ENSG00000066855 | MTFR1     | 146.305  | -0.163 | 6.727E-01 | 8.554E-01 | 159.341  | 0.711 | 8.725E-03 | 9.006E-02 |
| ENSG00000141068 | KSR1      | 102.360  | -0.164 | 6.755E-01 | 8.567E-01 | 140.318  | 0.561 | 4.605E-02 | 2.331E-01 |
| ENSG00000143811 | PYCR2     | 488.316  | 0.143  | 6.760E-01 | 8.571E-01 | 329.278  | 0.821 | 7.994E-03 | 8.492E-02 |
| ENSG00000119912 | IDE       | 181.752  | 0.117  | 6.788E-01 | 8.581E-01 | 186.045  | 0.549 | 4.004E-02 | 2.167E-01 |
| ENSG00000092445 | TYRO3     | 170.813  | 0.125  | 6.813E-01 | 8.594E-01 | 112.397  | 0.547 | 7.137E-02 | 2.925E-01 |
| ENSG00000110429 | FBXO3     | 107.415  | 0.130  | 6.816E-01 | 8.595E-01 | 93.532   | 0.521 | 8.969E-02 | 3.317E-01 |
| ENSG00000106701 | FSD1L     | 27.480   | 0.198  | 6.824E-01 | 8.600E-01 | 40.142   | 0.716 | 8.004E-02 | 3.127E-01 |
| ENSG00000092208 | GEMIN2    | 85.469   | -0.147 | 6.845E-01 | 8.610E-01 | 60.339   | 0.542 | 1.475E-01 | 4.342E-01 |
| ENSG00000198874 | TYW1      | 108.928  | 0.134  | 6.914E-01 | 8.655E-01 | 91.794   | 0.622 | 4.829E-02 | 2.389E-01 |
| ENSG00000131941 | RHPN2     | 85.718   | 0.177  | 6.937E-01 | 8.657E-01 | 56.672   | 0.732 | 4.173E-02 | 2.207E-01 |
| ENSG00000138617 | PARP16    | 48.156   | 0.172  | 6.947E-01 | 8.663E-01 | 44.099   | 0.573 | 1.538E-01 | 4.422E-01 |

|                 |            |         |        |           |           |         |       |           |           |
|-----------------|------------|---------|--------|-----------|-----------|---------|-------|-----------|-----------|
| ENSG00000106484 | MEST       | 165.752 | -0.163 | 6.969E-01 | 8.677E-01 | 109.565 | 0.504 | 1.799E-01 | 4.772E-01 |
| ENSG00000131759 | RARA       | 112.119 | 0.151  | 7.018E-01 | 8.699E-01 | 85.927  | 0.570 | 1.328E-01 | 4.114E-01 |
| ENSG00000144182 | LIPT1      | 18.537  | 0.195  | 7.042E-01 | 8.715E-01 | 35.098  | 0.569 | 1.412E-01 | 4.250E-01 |
| ENSG00000162676 | GFI1       | 24.716  | -0.191 | 7.094E-01 | 8.741E-01 | 44.738  | 0.652 | 1.012E-01 | 3.558E-01 |
| ENSG00000187118 | CMC1       | 136.277 | 0.137  | 7.101E-01 | 8.746E-01 | 120.450 | 0.767 | 1.163E-02 | 1.068E-01 |
| ENSG00000175104 | TRAF6      | 39.046  | 0.167  | 7.170E-01 | 8.786E-01 | 47.324  | 0.581 | 1.285E-01 | 4.041E-01 |
| ENSG00000269834 | ZNF528-AS1 | 53.066  | 0.154  | 7.228E-01 | 8.812E-01 | 42.812  | 0.816 | 3.335E-02 | 1.959E-01 |
| ENSG00000250317 | SMIM20     | 94.409  | -0.148 | 7.247E-01 | 8.827E-01 | 87.162  | 0.604 | 6.698E-02 | 2.842E-01 |
| ENSG00000164211 | STARD4     | 57.165  | 0.138  | 7.259E-01 | 8.835E-01 | 80.021  | 0.546 | 1.138E-01 | 3.778E-01 |
| ENSG00000167904 | TMEM68     | 55.282  | 0.145  | 7.259E-01 | 8.835E-01 | 42.957  | 0.524 | 1.704E-01 | 4.654E-01 |
| ENSG00000141198 | TOM1L1     | 134.274 | 0.106  | 7.271E-01 | 8.842E-01 | 128.235 | 0.549 | 6.881E-02 | 2.873E-01 |
| ENSG00000106537 | TSPAN13    | 35.108  | 0.158  | 7.280E-01 | 8.850E-01 | 30.436  | 0.571 | 1.628E-01 | 4.536E-01 |
| ENSG00000151151 | IPMK       | 142.824 | 0.106  | 7.352E-01 | 8.893E-01 | 77.811  | 0.545 | 1.141E-01 | 3.782E-01 |
| ENSG00000124641 | MED20      | 144.092 | -0.109 | 7.363E-01 | 8.903E-01 | 154.677 | 0.730 | 1.226E-02 | 1.104E-01 |
| ENSG00000132964 | CDK8       | 79.511  | 0.139  | 7.363E-01 | 8.903E-01 | 80.199  | 0.565 | 8.433E-02 | 3.212E-01 |
| ENSG00000167771 | RCOR2      | 99.003  | -0.151 | 7.370E-01 | 8.907E-01 | 63.884  | 1.029 | 1.135E-02 | 1.050E-01 |
| ENSG00000147889 | CDKN2A     | 52.532  | -0.145 | 7.371E-01 | 8.907E-01 | 32.075  | 0.862 | 3.488E-02 | 2.006E-01 |
| ENSG00000180488 | MIGA1      | 41.773  | 0.153  | 7.371E-01 | 8.907E-01 | 71.476  | 0.693 | 5.903E-02 | 2.669E-01 |
| ENSG00000147789 | ZNF7       | 60.027  | -0.135 | 7.406E-01 | 8.924E-01 | 58.918  | 0.693 | 5.568E-02 | 2.584E-01 |
| ENSG00000109861 | CTSC       | 263.991 | -0.118 | 7.420E-01 | 8.930E-01 | 154.569 | 0.767 | 2.143E-02 | 1.536E-01 |
| ENSG00000120686 | UFM1       | 208.154 | 0.125  | 7.425E-01 | 8.934E-01 | 233.043 | 0.701 | 5.908E-03 | 7.037E-02 |
| ENSG00000167543 | TP53I13    | 146.623 | 0.104  | 7.430E-01 | 8.934E-01 | 151.675 | 0.610 | 4.383E-02 | 2.276E-01 |
| ENSG00000130312 | MRPL34     | 718.469 | 0.105  | 7.459E-01 | 8.949E-01 | 619.742 | 0.518 | 2.809E-02 | 1.769E-01 |
| ENSG00000158079 | PTPDC1     | 58.150  | 0.131  | 7.469E-01 | 8.954E-01 | 79.846  | 0.597 | 8.596E-02 | 3.243E-01 |
| ENSG00000115514 | TXNDC9     | 162.646 | -0.110 | 7.473E-01 | 8.955E-01 | 154.457 | 0.600 | 3.821E-02 | 2.108E-01 |
| ENSG00000272886 | DCP1A      | 161.660 | 0.105  | 7.476E-01 | 8.957E-01 | 161.511 | 0.608 | 3.608E-02 | 2.038E-01 |

|                 |         |          |        |           |           |         |       |           |           |
|-----------------|---------|----------|--------|-----------|-----------|---------|-------|-----------|-----------|
| ENSG00000135047 | CTSL    | 184.078  | 0.166  | 7.489E-01 | 8.961E-01 | 121.644 | 0.559 | 1.215E-01 | 3.910E-01 |
| ENSG00000188612 | SUMO2   | 193.331  | -0.110 | 7.516E-01 | 8.970E-01 | 180.898 | 0.510 | 5.157E-02 | 2.481E-01 |
| ENSG00000102393 | GLA     | 57.543   | 0.142  | 7.530E-01 | 8.970E-01 | 60.533  | 0.755 | 3.760E-02 | 2.087E-01 |
| ENSG00000105290 | APLP1   | 35.689   | 0.143  | 7.533E-01 | 8.970E-01 | 37.346  | 0.634 | 1.093E-01 | 3.700E-01 |
| ENSG00000159433 | STARD9  | 69.576   | -0.125 | 7.563E-01 | 8.984E-01 | 69.643  | 0.558 | 1.094E-01 | 3.701E-01 |
| ENSG00000066583 | ISOC1   | 253.793  | -0.102 | 7.596E-01 | 8.995E-01 | 172.937 | 1.031 | 2.931E-03 | 4.474E-02 |
| ENSG00000170634 | ACYP2   | 48.862   | 0.122  | 7.652E-01 | 9.018E-01 | 46.545  | 0.518 | 1.876E-01 | 4.870E-01 |
| ENSG00000172071 | EIF2AK3 | 124.129  | 0.100  | 7.686E-01 | 9.032E-01 | 102.420 | 0.523 | 1.503E-01 | 4.377E-01 |
| ENSG00000096746 | HNRNPH3 | 930.146  | -0.136 | 7.697E-01 | 9.036E-01 | 531.762 | 0.677 | 1.096E-02 | 1.029E-01 |
| ENSG00000156374 | PCGF6   | 43.668   | 0.135  | 7.732E-01 | 9.054E-01 | 31.981  | 0.839 | 3.831E-02 | 2.112E-01 |
| ENSG00000070081 | NUCB2   | 491.570  | 0.072  | 7.739E-01 | 9.055E-01 | 426.274 | 0.608 | 8.329E-03 | 8.740E-02 |
| ENSG00000101452 | DHX35   | 83.964   | -0.115 | 7.744E-01 | 9.059E-01 | 85.923  | 0.550 | 9.385E-02 | 3.399E-01 |
| ENSG00000117650 | NEK2    | 187.159  | 0.080  | 7.750E-01 | 9.063E-01 | 174.757 | 0.660 | 2.498E-02 | 1.668E-01 |
| ENSG00000120685 | PROSER1 | 200.363  | 0.075  | 7.809E-01 | 9.092E-01 | 150.811 | 0.578 | 4.827E-02 | 2.389E-01 |
| ENSG00000237550 | RPL9P9  | 136.022  | 0.146  | 7.846E-01 | 9.116E-01 | 70.977  | 0.760 | 4.747E-02 | 2.374E-01 |
| ENSG00000099246 | RAB18   | 491.554  | 0.072  | 7.852E-01 | 9.119E-01 | 496.079 | 0.513 | 1.066E-02 | 1.011E-01 |
| ENSG00000090975 | PITPNM2 | 91.383   | 0.099  | 7.865E-01 | 9.128E-01 | 71.784  | 0.516 | 1.342E-01 | 4.137E-01 |
| ENSG00000136810 | TXN     | 1550.272 | 0.137  | 7.875E-01 | 9.131E-01 | 822.629 | 0.611 | 1.371E-01 | 4.182E-01 |
| ENSG00000175711 | B3GNTL1 | 41.780   | 0.119  | 7.878E-01 | 9.132E-01 | 44.620  | 0.515 | 1.805E-01 | 4.780E-01 |
| ENSG00000169902 | TPST1   | 74.358   | 0.107  | 7.892E-01 | 9.136E-01 | 60.801  | 0.600 | 1.050E-01 | 3.621E-01 |
| ENSG00000172732 | MUS81   | 86.752   | -0.106 | 7.936E-01 | 9.154E-01 | 78.728  | 0.797 | 2.350E-02 | 1.621E-01 |
| ENSG00000107566 | ERLIN1  | 625.612  | 0.089  | 7.953E-01 | 9.162E-01 | 343.846 | 0.518 | 9.349E-02 | 3.392E-01 |
| ENSG00000180228 | PRKRA   | 203.558  | 0.100  | 8.003E-01 | 9.181E-01 | 227.041 | 0.543 | 3.186E-02 | 1.907E-01 |
| ENSG00000116213 | WRAP73  | 151.726  | 0.097  | 8.069E-01 | 9.198E-01 | 123.662 | 0.602 | 9.519E-02 | 3.426E-01 |
| ENSG00000156026 | MCU     | 241.053  | 0.067  | 8.077E-01 | 9.202E-01 | 233.739 | 0.536 | 2.654E-02 | 1.717E-01 |
| ENSG00000158941 | CCAR2   | 61.303   | -0.096 | 8.128E-01 | 9.226E-01 | 57.886  | 0.566 | 1.089E-01 | 3.691E-01 |

|                  |         |          |        |           |           |         |       |           |           |
|------------------|---------|----------|--------|-----------|-----------|---------|-------|-----------|-----------|
| ENSG00000086065  | CHMP5   | 389.888  | 0.075  | 8.178E-01 | 9.247E-01 | 290.443 | 0.624 | 3.991E-02 | 2.163E-01 |
| ENSG00000027001  | MIPEP   | 94.555   | -0.085 | 8.235E-01 | 9.269E-01 | 75.002  | 0.877 | 1.193E-02 | 1.087E-01 |
| ENSG000000247844 | CCAT1   | 32.524   | -0.111 | 8.262E-01 | 9.280E-01 | 55.714  | 0.637 | 7.509E-02 | 3.015E-01 |
| ENSG000000147119 | CHST7   | 26.779   | -0.110 | 8.274E-01 | 9.286E-01 | 30.364  | 0.775 | 5.193E-02 | 2.487E-01 |
| ENSG000000141543 | EIF4A3  | 1009.095 | -0.068 | 8.303E-01 | 9.302E-01 | 910.886 | 0.508 | 7.322E-03 | 7.959E-02 |
| ENSG00000050130  | JKAMP   | 141.674  | -0.113 | 8.322E-01 | 9.310E-01 | 70.214  | 0.844 | 3.383E-02 | 1.976E-01 |
| ENSG000000131115 | ZNF227  | 73.124   | 0.104  | 8.325E-01 | 9.311E-01 | 37.723  | 0.996 | 1.403E-02 | 1.194E-01 |
| ENSG000000167977 | KCTD5   | 181.099  | 0.109  | 8.343E-01 | 9.317E-01 | 84.339  | 0.847 | 1.586E-02 | 1.290E-01 |
| ENSG000000178971 | CTC1    | 43.963   | -0.088 | 8.356E-01 | 9.327E-01 | 65.264  | 0.509 | 1.638E-01 | 4.550E-01 |
| ENSG000000125821 | DTD1    | 587.955  | 0.064  | 8.392E-01 | 9.345E-01 | 460.208 | 0.671 | 2.901E-02 | 1.811E-01 |
| ENSG000000166716 | ZNF592  | 69.614   | 0.074  | 8.421E-01 | 9.357E-01 | 64.634  | 0.573 | 1.057E-01 | 3.631E-01 |
| ENSG000000178202 | KDELC2  | 48.240   | 0.088  | 8.423E-01 | 9.357E-01 | 73.308  | 0.587 | 8.420E-02 | 3.209E-01 |
| ENSG000000204267 | TAP2    | 423.381  | -0.050 | 8.441E-01 | 9.368E-01 | 308.918 | 0.548 | 6.471E-02 | 2.787E-01 |
| ENSG000000123836 | PFKFB2  | 70.895   | 0.075  | 8.441E-01 | 9.368E-01 | 62.902  | 0.577 | 1.007E-01 | 3.546E-01 |
| ENSG000000213995 | NAXD    | 88.080   | -0.084 | 8.443E-01 | 9.369E-01 | 104.678 | 0.616 | 5.265E-02 | 2.509E-01 |
| ENSG000000104221 | BRF2    | 50.337   | -0.089 | 8.446E-01 | 9.371E-01 | 53.504  | 0.827 | 2.778E-02 | 1.754E-01 |
| ENSG000000175110 | MRPS22  | 273.427  | 0.070  | 8.461E-01 | 9.374E-01 | 170.033 | 0.872 | 1.460E-02 | 1.221E-01 |
| ENSG000000131871 | SELENOS | 632.083  | -0.040 | 8.479E-01 | 9.382E-01 | 460.160 | 0.569 | 1.252E-02 | 1.122E-01 |
| ENSG000000134996 | OSTF1   | 63.160   | -0.079 | 8.497E-01 | 9.391E-01 | 54.782  | 0.528 | 1.759E-01 | 4.715E-01 |
| ENSG000000106554 | CHCHD3  | 238.361  | 0.067  | 8.634E-01 | 9.450E-01 | 145.054 | 0.718 | 1.578E-02 | 1.285E-01 |
| ENSG000000132581 | SDF2    | 168.088  | -0.055 | 8.688E-01 | 9.470E-01 | 146.178 | 0.567 | 6.098E-02 | 2.721E-01 |
| ENSG000000130699 | TAF4    | 129.803  | 0.058  | 8.690E-01 | 9.470E-01 | 122.916 | 0.672 | 2.098E-02 | 1.522E-01 |
| ENSG000000167005 | NUDT21  | 888.799  | -0.042 | 8.705E-01 | 9.474E-01 | 623.795 | 0.578 | 2.639E-02 | 1.714E-01 |
| ENSG000000175376 | EIF1AD  | 147.283  | 0.054  | 8.734E-01 | 9.489E-01 | 86.607  | 0.623 | 7.243E-02 | 2.948E-01 |
| ENSG000000204335 | SP5     | 1812.173 | -0.076 | 8.800E-01 | 9.522E-01 | 750.313 | 0.525 | 1.816E-01 | 4.803E-01 |
| ENSG000000133731 | IMPA1   | 123.670  | -0.051 | 8.851E-01 | 9.538E-01 | 109.687 | 0.789 | 8.707E-03 | 9.006E-02 |

|                 |          |          |        |           |           |          |       |           |           |
|-----------------|----------|----------|--------|-----------|-----------|----------|-------|-----------|-----------|
| ENSG00000108671 | PSMD11   | 2053.869 | -0.037 | 8.872E-01 | 9.549E-01 | 1687.249 | 0.687 | 2.119E-04 | 7.749E-03 |
| ENSG00000101544 | ADNP2    | 404.761  | 0.036  | 8.949E-01 | 9.580E-01 | 407.375  | 0.586 | 1.271E-02 | 1.131E-01 |
| ENSG00000070761 | CFAP20   | 350.302  | 0.043  | 9.002E-01 | 9.606E-01 | 241.463  | 0.627 | 1.332E-01 | 4.121E-01 |
| ENSG00000198393 | ZNF26    | 53.807   | 0.051  | 9.004E-01 | 9.606E-01 | 45.942   | 0.642 | 8.699E-02 | 3.267E-01 |
| ENSG00000271601 | LIX1L    | 103.596  | -0.055 | 9.010E-01 | 9.606E-01 | 78.341   | 0.648 | 7.814E-02 | 3.075E-01 |
| ENSG00000122882 | ECD      | 234.320  | -0.039 | 9.018E-01 | 9.609E-01 | 181.523  | 0.655 | 2.096E-02 | 1.521E-01 |
| ENSG00000134056 | MRPS36   | 238.582  | 0.041  | 9.028E-01 | 9.609E-01 | 215.932  | 0.587 | 5.810E-02 | 2.643E-01 |
| ENSG00000075131 | TIPIN    | 99.499   | 0.043  | 9.029E-01 | 9.609E-01 | 58.533   | 0.519 | 1.542E-01 | 4.423E-01 |
| ENSG00000138495 | COX17    | 755.801  | 0.034  | 9.058E-01 | 9.624E-01 | 534.061  | 0.701 | 8.442E-03 | 8.831E-02 |
| ENSG00000105732 | ZNF574   | 57.745   | 0.048  | 9.090E-01 | 9.631E-01 | 91.821   | 0.796 | 2.163E-02 | 1.544E-01 |
| ENSG00000118197 | DDX59    | 72.055   | 0.049  | 9.103E-01 | 9.632E-01 | 73.099   | 0.677 | 5.405E-02 | 2.540E-01 |
| ENSG00000139343 | SNRPF    | 1385.009 | -0.033 | 9.131E-01 | 9.650E-01 | 869.751  | 0.507 | 5.251E-02 | 2.508E-01 |
| ENSG00000172932 | ANKRD13D | 49.695   | -0.042 | 9.176E-01 | 9.670E-01 | 69.127   | 0.708 | 4.892E-02 | 2.403E-01 |
| ENSG00000102471 | NDFIP2   | 126.079  | 0.035  | 9.182E-01 | 9.673E-01 | 107.853  | 0.656 | 4.275E-02 | 2.237E-01 |
| ENSG00000149923 | PPP4C    | 207.209  | 0.053  | 9.205E-01 | 9.674E-01 | 108.348  | 0.830 | 2.647E-02 | 1.716E-01 |
| ENSG00000076604 | TRAF4    | 375.093  | 0.024  | 9.238E-01 | 9.694E-01 | 313.746  | 0.559 | 1.551E-02 | 1.273E-01 |
| ENSG00000159399 | HK2      | 251.522  | 0.030  | 9.261E-01 | 9.704E-01 | 140.170  | 0.911 | 1.279E-02 | 1.132E-01 |
| ENSG00000170222 | ADPRM    | 23.995   | -0.041 | 9.330E-01 | 9.731E-01 | 34.633   | 0.546 | 1.696E-01 | 4.642E-01 |
| ENSG00000155959 | VBP1     | 194.026  | -0.023 | 9.334E-01 | 9.731E-01 | 183.655  | 0.513 | 4.075E-02 | 2.185E-01 |
| ENSG00000115840 | SLC25A12 | 39.395   | 0.040  | 9.327E-01 | 9.731E-01 | 38.706   | 0.506 | 1.906E-01 | 4.903E-01 |
| ENSG00000175606 | TMEM70   | 201.133  | 0.027  | 9.370E-01 | 9.744E-01 | 140.110  | 0.540 | 7.553E-02 | 3.023E-01 |
| ENSG00000088179 | PTPN4    | 65.533   | -0.032 | 9.373E-01 | 9.746E-01 | 78.349   | 0.579 | 7.295E-02 | 2.959E-01 |
| ENSG00000158158 | CNNM4    | 68.547   | 0.030  | 9.396E-01 | 9.756E-01 | 54.094   | 1.416 | 1.417E-04 | 5.756E-03 |
| ENSG00000143486 | EIF2D    | 231.790  | 0.027  | 9.431E-01 | 9.773E-01 | 150.654  | 0.516 | 1.302E-01 | 4.074E-01 |
| ENSG00000171723 | GPHN     | 75.869   | 0.027  | 9.458E-01 | 9.783E-01 | 85.877   | 0.621 | 5.689E-02 | 2.614E-01 |
| ENSG00000102580 | DNAJC3   | 484.963  | 0.014  | 9.496E-01 | 9.802E-01 | 352.466  | 0.645 | 8.490E-03 | 8.855E-02 |

|                 |            |         |        |           |           |         |       |           |           |
|-----------------|------------|---------|--------|-----------|-----------|---------|-------|-----------|-----------|
| ENSG00000213341 | CHUK       | 153.260 | -0.025 | 9.504E-01 | 9.803E-01 | 110.814 | 1.056 | 6.928E-04 | 1.759E-02 |
| ENSG00000158122 | AAED1      | 127.947 | -0.021 | 9.521E-01 | 9.809E-01 | 93.309  | 0.545 | 1.092E-01 | 3.698E-01 |
| ENSG00000253833 | AC022868.1 | 34.371  | 0.027  | 9.577E-01 | 9.832E-01 | 30.922  | 0.574 | 1.567E-01 | 4.470E-01 |
| ENSG00000247498 | GPRC5D-AS1 | 41.874  | -0.022 | 9.606E-01 | 9.834E-01 | 49.868  | 0.619 | 1.056E-01 | 3.631E-01 |
| ENSG00000140577 | CRTC3      | 145.636 | 0.017  | 9.600E-01 | 9.834E-01 | 176.339 | 0.565 | 6.053E-02 | 2.712E-01 |
| ENSG00000121579 | NAA50      | 934.373 | -0.010 | 9.636E-01 | 9.848E-01 | 779.877 | 0.507 | 1.481E-02 | 1.233E-01 |
| ENSG00000123728 | RAP2C      | 115.082 | -0.015 | 9.647E-01 | 9.852E-01 | 72.390  | 0.510 | 1.355E-01 | 4.159E-01 |
| ENSG00000179598 | PLD6       | 94.891  | -0.016 | 9.659E-01 | 9.858E-01 | 84.727  | 0.513 | 1.213E-01 | 3.907E-01 |
| ENSG00000114648 | KLHL18     | 105.686 | -0.014 | 9.661E-01 | 9.858E-01 | 98.167  | 0.722 | 3.107E-02 | 1.880E-01 |
| ENSG00000138785 | INTS12     | 87.601  | 0.013  | 9.746E-01 | 9.893E-01 | 132.789 | 0.513 | 1.012E-01 | 3.558E-01 |
| ENSG00000117519 | CNN3       | 593.714 | 0.010  | 9.753E-01 | 9.895E-01 | 366.364 | 0.715 | 8.227E-03 | 8.689E-02 |
| ENSG00000072401 | UBE2D1     | 111.484 | -0.012 | 9.763E-01 | 9.900E-01 | 107.278 | 0.503 | 1.163E-01 | 3.823E-01 |
| ENSG00000188215 | DCUN1D3    | 110.329 | 0.009  | 9.802E-01 | 9.915E-01 | 70.160  | 0.540 | 1.324E-01 | 4.108E-01 |
| ENSG00000139197 | PEX5       | 93.681  | -0.008 | 9.849E-01 | 9.934E-01 | 61.710  | 0.569 | 1.107E-01 | 3.722E-01 |
| ENSG00000140939 | NOL3       | 37.455  | 0.009  | 9.861E-01 | 9.938E-01 | 37.191  | 0.739 | 5.953E-02 | 2.688E-01 |
| ENSG00000127334 | DYRK2      | 95.611  | -0.003 | 9.923E-01 | 9.971E-01 | 140.054 | 0.532 | 5.347E-02 | 2.528E-01 |
| ENSG00000118046 | STK11      | 71.332  | -0.004 | 9.924E-01 | 9.971E-01 | 77.650  | 0.617 | 9.044E-02 | 3.336E-01 |
| ENSG00000205937 | RNPS1      | 643.478 | 0.002  | 9.946E-01 | 9.980E-01 | 609.989 | 0.596 | 1.449E-02 | 1.214E-01 |
| ENSG00000168994 | PXDC1      | 147.540 | -0.003 | 9.948E-01 | 9.980E-01 | 78.554  | 0.798 | 2.485E-02 | 1.668E-01 |
| ENSG00000077721 | UBE2A      | 289.691 | 0.000  | 9.994E-01 | 9.995E-01 | 238.164 | 0.528 | 2.733E-02 | 1.740E-01 |
| ENSG00000115009 | CCL20      | 204.771 | -1.168 | NA        | NA        | 42.286  | 0.448 | 2.795E-01 | 5.905E-01 |

(Direct) predicted  
targets



**Table S14.** STRING clusters analysis of targets down-regulated by miR-512-3p.

| Cluster number | Protein name |
|----------------|--------------|
| 1              | ABCG8        |
| 1              | ACVR1        |
| 1              | ACYP2        |
| 1              | AGFG2        |
| 1              | AHDC1        |
| 1              | ANAPC1       |
| 1              | ANKRD26      |
| 1              | ANKRD27      |
| 1              | ANKS1A       |
| 1              | AREL1        |
| 1              | ARHGAP1      |
| 1              | ARHGAP18     |
| 1              | ARHGAP19     |
| 1              | ARID3A       |
| 1              | ARL13B       |
| 1              | ARVCF        |
| 1              | ATAD5        |
| 1              | ATOH8        |
| 1              | ATXN7L3B     |
| 1              | BCL7B        |
| 1              | BIRC5        |
| 1              | BORA         |
| 1              | C18orf8      |
| 1              | C19orf25     |
| 1              | C21orf33     |
| 1              | C2orf48      |
| 1              | C4orf29      |
| 1              | C6orf120     |
| 1              | CAPZA2       |
| 1              | CAPZB        |
| 1              | CBLL1        |
| 1              | CBWD1        |
| 1              | CBX2         |
| 1              | CCDC138      |
| 1              | CCDC18       |
| 1              | CCDC64       |
| 1              | CCDC77       |
| 1              | CCDC85C      |
| 1              | CCNB1        |
| 1              | CCNF         |
| 1              | CCNY         |
| 1              | CCZ1B        |

|   |         |
|---|---------|
| 1 | CDCA3   |
| 1 | CDK19   |
| 1 | CENPA   |
| 1 | CENPF   |
| 1 | CENPH   |
| 1 | CENPJ   |
| 1 | CEP83   |
| 1 | CHMP5   |
| 1 | CHTF8   |
| 1 | CIT     |
| 1 | CNOT8   |
| 1 | COLCA2  |
| 1 | CORO2A  |
| 1 | CRIP3   |
| 1 | CRIPAK  |
| 1 | CSTF1   |
| 1 | DAB2IP  |
| 1 | DCAF16  |
| 1 | DCTN6   |
| 1 | DCUN1D1 |
| 1 | DDX11   |
| 1 | DEPDC1B |
| 1 | DHRS7   |
| 1 | DIAPH1  |
| 1 | DLGAP5  |
| 1 | DNAL4   |
| 1 | DSN1    |
| 1 | DYNLL1  |
| 1 | ELK1    |
| 1 | ELMOD2  |
| 1 | EME1    |
| 1 | ERCC6L  |
| 1 | ERV3-1  |
| 1 | ESCO2   |
| 1 | ESPL1   |
| 1 | FAM213B |
| 1 | FAM222A |
| 1 | FAM64A  |
| 1 | FAM83D  |
| 1 | FANCC   |
| 1 | FANCG   |
| 1 | FANCL   |
| 1 | FANCM   |
| 1 | FBXL18  |
| 1 | FBXO21  |

|   |          |
|---|----------|
| 1 | FBXO28   |
| 1 | FBXO3    |
| 1 | FBXO9    |
| 1 | FCHO2    |
| 1 | FEN1     |
| 1 | FGFR1OP  |
| 1 | FKBPL    |
| 1 | FOXK1    |
| 1 | FSD1L    |
| 1 | FZD4     |
| 1 | GIN51    |
| 1 | GIN53    |
| 1 | GPSM2    |
| 1 | GRTP1    |
| 1 | GTF2IRD1 |
| 1 | HAUS3    |
| 1 | HEATR2   |
| 1 | HEG1     |
| 1 | HEXIM2   |
| 1 | HIP1     |
| 1 | HPN      |
| 1 | IFT74    |
| 1 | IGF2BP3  |
| 1 | IKBIP    |
| 1 | INO80C   |
| 1 | INTS12   |
| 1 | INTS9    |
| 1 | ITPRIPL2 |
| 1 | KDELC2   |
| 1 | KDM2A    |
| 1 | KIAA0586 |
| 1 | KIF13B   |
| 1 | KIF18B   |
| 1 | KIF20A   |
| 1 | KIF7     |
| 1 | KIFC1    |
| 1 | KLHL26   |
| 1 | KLHL28   |
| 1 | KNSTRN   |
| 1 | KNTC1    |
| 1 | LGR4     |
| 1 | LIN52    |
| 1 | LIN54    |
| 1 | LLGL1    |
| 1 | LMCD1    |

|   |          |
|---|----------|
| 1 | LRRC45   |
| 1 | MAD2L1BP |
| 1 | MAPRE1   |
| 1 | MARCH8   |
| 1 | MARCH9   |
| 1 | MASTL    |
| 1 | MAU2     |
| 1 | MCM10    |
| 1 | MCM3     |
| 1 | MCPH1    |
| 1 | MED17    |
| 1 | MED18    |
| 1 | MED20    |
| 1 | MED29    |
| 1 | MIS18A   |
| 1 | MOB1A    |
| 1 | MON1B    |
| 1 | MRAS     |
| 1 | MYH10    |
| 1 | MYRF     |
| 1 | NAB2     |
| 1 | NDC80    |
| 1 | NDEL1    |
| 1 | NEK2     |
| 1 | NINL     |
| 1 | NOTUM    |
| 1 | NUP37    |
| 1 | OPN3     |
| 1 | ORC6     |
| 1 | OSTF1    |
| 1 | PBK      |
| 1 | PDLIM5   |
| 1 | PHF1     |
| 1 | PKD2     |
| 1 | PKN3     |
| 1 | PLEKHG6  |
| 1 | PPAPDC2  |
| 1 | PPP4C    |
| 1 | PRC1     |
| 1 | PRIM1    |
| 1 | PTPDC1   |
| 1 | RAB21    |
| 1 | RAB22A   |
| 1 | RAB31    |
| 1 | RABL2A   |

|   |          |
|---|----------|
| 1 | RABL2B   |
| 1 | RAD23B   |
| 1 | RAD51C   |
| 1 | RAP1GAP  |
| 1 | RAP2A    |
| 1 | RBBP7    |
| 1 | RCC2     |
| 1 | REEP6    |
| 1 | RFFL     |
| 1 | RFX5     |
| 1 | RHPN2    |
| 1 | RIN1     |
| 1 | RMI2     |
| 1 | RNF138   |
| 1 | RNF14    |
| 1 | RNF38    |
| 1 | RNF43    |
| 1 | RNF6     |
| 1 | RPA3     |
| 1 | RRAGC    |
| 1 | RRM2     |
| 1 | SAMD1    |
| 1 | SAP30    |
| 1 | SDCCAG3  |
| 1 | SEC14L1  |
| 1 | SGOL1    |
| 1 | SHKBP1   |
| 1 | SHROOM1  |
| 1 | SLC25A24 |
| 1 | SLC35E2B |
| 1 | SLC38A7  |
| 1 | SMARCA1  |
| 1 | SNTB1    |
| 1 | SNX14    |
| 1 | SPAG16   |
| 1 | SPG11    |
| 1 | STIL     |
| 1 | TADA1    |
| 1 | TAP2     |
| 1 | TBX2     |
| 1 | TESK1    |
| 1 | TMEM138  |
| 1 | TMEM45B  |
| 1 | TMEM50B  |
| 1 | TOP2B    |

|   |          |
|---|----------|
| 1 | TRAFD1   |
| 1 | TRIM37   |
| 1 | TRIM52   |
| 1 | TRIM66   |
| 1 | TRPV2    |
| 1 | TSC22D4  |
| 1 | TTC21B   |
| 1 | TUBA1B   |
| 1 | TUBE1    |
| 1 | TUBG1    |
| 1 | UBBP4    |
| 1 | UBE2T    |
| 1 | UBE4B    |
| 1 | UHMK1    |
| 1 | UHRF1    |
| 1 | UNC119B  |
| 1 | UVRAG    |
| 1 | VPRBP    |
| 1 | VWA9     |
| 1 | WDR19    |
| 1 | WDR27    |
| 1 | WDR42A   |
| 1 | WWC2     |
| 1 | ZBTB33   |
| 1 | ZBTB39   |
| 1 | ZBTB9    |
| 1 | ZCWPW1   |
| 1 | ZDHHC21  |
| 1 | ZDHHC23  |
| 1 | ZNF227   |
| 1 | ZNF32    |
| 1 | ZNF354A  |
| 1 | ZNF362   |
| 1 | ZNF572   |
| 1 | ZNF587B  |
| 1 | ZNF747   |
| 2 | AFP      |
| 2 | AGGF1    |
| 2 | AGO4     |
| 2 | ALB      |
| 2 | ALDH18A1 |
| 2 | AP3B1    |
| 2 | AP4E1    |
| 2 | APEX1    |
| 2 | ARF6     |

|   |            |
|---|------------|
| 2 | ASRGL1     |
| 2 | BACE1      |
| 2 | BCAR1      |
| 2 | BIRC3      |
| 2 | BPTF       |
| 2 | BRCA2      |
| 2 | BRD3       |
| 2 | CASP9      |
| 2 | CAT        |
| 2 | CCAR2      |
| 2 | CCDC58     |
| 2 | CCNH       |
| 2 | CD9        |
| 2 | CDK12      |
| 2 | CDK6       |
| 2 | CDK8       |
| 2 | CDKN1B     |
| 2 | CDKN2A     |
| 2 | CDKN2AIPNL |
| 2 | CDR2       |
| 2 | CHEK2      |
| 2 | CHKA       |
| 2 | CHUK       |
| 2 | CLN3       |
| 2 | COG2       |
| 2 | COPS7A     |
| 2 | CREB1      |
| 2 | CSRNP2     |
| 2 | CTTN       |
| 2 | CUL1       |
| 2 | CUL3       |
| 2 | CYP19A1    |
| 2 | DAD1       |
| 2 | DDHD1      |
| 2 | DGCR8      |
| 2 | DKK1       |
| 2 | DLG1       |
| 2 | DMAP1      |
| 2 | DNA2       |
| 2 | DNMT3A     |
| 2 | DUSP6      |
| 2 | E2F2       |
| 2 | E2F3       |
| 2 | E2F4       |
| 2 | E2F5       |

|   |         |
|---|---------|
| 2 | EEF1B2  |
| 2 | EIF2AK3 |
| 2 | EIF4E   |
| 2 | EPO     |
| 2 | ESRRA   |
| 2 | ETAA1   |
| 2 | EWSR1   |
| 2 | FADD    |
| 2 | FAS     |
| 2 | FERMT2  |
| 2 | FGFR1   |
| 2 | FH      |
| 2 | FHL2    |
| 2 | FMR1    |
| 2 | GFI1    |
| 2 | GGH     |
| 2 | GID4    |
| 2 | GLIS2   |
| 2 | GNB5    |
| 2 | GNPTG   |
| 2 | GOLPH3  |
| 2 | GPHN    |
| 2 | GPS2    |
| 2 | H2AFX   |
| 2 | HCFC1   |
| 2 | HIP1R   |
| 2 | HIPK2   |
| 2 | HK2     |
| 2 | HMGCR   |
| 2 | HOMER1  |
| 2 | HSPA8   |
| 2 | HTRA2   |
| 2 | ID1     |
| 2 | IDE     |
| 2 | IDH1    |
| 2 | IGF2BP1 |
| 2 | IGF2R   |
| 2 | INF2    |
| 2 | INSR    |
| 2 | INTS2   |
| 2 | IRS1    |
| 2 | KDELRL2 |
| 2 | KDM4A   |
| 2 | KDM5B   |
| 2 | KDM7A   |



|   |          |
|---|----------|
| 2 | KSR1     |
| 2 | LBR      |
| 2 | LCLAT1   |
| 2 | LONP2    |
| 2 | LOX      |
| 2 | MACF1    |
| 2 | MAP2K6   |
| 2 | MAP3K7   |
| 2 | MAPK3    |
| 2 | MAPKAPK5 |
| 2 | MAT2A    |
| 2 | MAT2B    |
| 2 | MCL1     |
| 2 | MED1     |
| 2 | METTL3   |
| 2 | MLXIPL   |
| 2 | MOCS3    |
| 2 | MORF4L2  |
| 2 | MTHFR    |
| 2 | MYC      |
| 2 | MYD88    |
| 2 | NCOA2    |
| 2 | NDRG1    |
| 2 | NES      |
| 2 | NKX3-1   |
| 2 | NR1H3    |
| 2 | NR1H4    |
| 2 | NR2F1    |
| 2 | NUP210   |
| 2 | PARVA    |
| 2 | PAX6     |
| 2 | PBRM1    |
| 2 | PCK1     |
| 2 | PDE3B    |
| 2 | PDK1     |
| 2 | PEX5     |
| 2 | PFN1     |
| 2 | PIK3C3   |
| 2 | PIK3CB   |
| 2 | PIM2     |
| 2 | PITHD1   |
| 2 | PLCB3    |
| 2 | PRKAR1A  |
| 2 | PRKCD    |
| 2 | PRKCI    |

|   |          |
|---|----------|
| 2 | PRNP     |
| 2 | PROM1    |
| 2 | PSAT1    |
| 2 | PSEN1    |
| 2 | PSMA3    |
| 2 | PSMA4    |
| 2 | PSMD11   |
| 2 | PSMD14   |
| 2 | RANBP9   |
| 2 | RARA     |
| 2 | RB1      |
| 2 | RBL1     |
| 2 | RBL2     |
| 2 | RCC1     |
| 2 | RNF123   |
| 2 | RNF126   |
| 2 | RNF2     |
| 2 | RPTOR    |
| 2 | RRAS2    |
| 2 | SDC1     |
| 2 | SDCBP    |
| 2 | SDHC     |
| 2 | SEN1     |
| 2 | SERPINE1 |
| 2 | SETD1B   |
| 2 | SIRT5    |
| 2 | SKP2     |
| 2 | SLC25A12 |
| 2 | SLC45A3  |
| 2 | SMAD2    |
| 2 | SMEK2    |
| 2 | SNX1     |
| 2 | SORL1    |
| 2 | SORT1    |
| 2 | SOX9     |
| 2 | SP4      |
| 2 | SREBF1   |
| 2 | SRSF1    |
| 2 | STK11    |
| 2 | STX16    |
| 2 | SUCLG2   |
| 2 | SUFU     |
| 2 | SUMO2    |
| 2 | SYNE2    |
| 2 | TAF1     |

|   |         |
|---|---------|
| 2 | TBP     |
| 2 | TCF7L1  |
| 2 | TFDP1   |
| 2 | TFPI    |
| 2 | TGOLN2  |
| 2 | TJP2    |
| 2 | TMEM209 |
| 2 | TMX1    |
| 2 | TOPBP1  |
| 2 | TRADD   |
| 2 | TRAF6   |
| 2 | TRIM25  |
| 2 | TXN     |
| 2 | TXNDC9  |
| 2 | UBA3    |
| 2 | UBE2A   |
| 2 | UBE2D1  |
| 2 | UBE2G2  |
| 2 | UBE2J1  |
| 2 | UBE2V1  |
| 2 | UBL4A   |
| 2 | UFM1    |
| 2 | USP22   |
| 2 | UTRN    |
| 2 | VPS26A  |
| 2 | VPS37A  |
| 2 | VPS41   |
| 2 | WAC     |
| 2 | WRAP73  |
| 2 | ZYG11B  |
| 3 | ABHD17B |
| 3 | AIDA    |
| 3 | AIF1L   |
| 3 | AK4     |
| 3 | ALKBH3  |
| 3 | ALKBH6  |
| 3 | ALMS1   |
| 3 | ANKRD37 |
| 3 | APBB2   |
| 3 | APEX2   |
| 3 | APLP1   |
| 3 | APOL2   |
| 3 | APPBP2  |
| 3 | AQR     |
| 3 | ARL16   |

|   |          |
|---|----------|
| 3 | ASB7     |
| 3 | ATE1     |
| 3 | ATF1     |
| 3 | ATP11A   |
| 3 | BCAS2    |
| 3 | BCORL1   |
| 3 | BRF2     |
| 3 | BYSL     |
| 3 | C10orf2  |
| 3 | C11orf30 |
| 3 | C11orf73 |
| 3 | C15orf61 |
| 3 | C18orf21 |
| 3 | C3orf17  |
| 3 | CAMKMT   |
| 3 | CCDC137  |
| 3 | CCDC28A  |
| 3 | CCDC86   |
| 3 | CCNJ     |
| 3 | CDC37L1  |
| 3 | CFAP20   |
| 3 | CGGBP1   |
| 3 | CGI-74   |
| 3 | CLEC16A  |
| 3 | CLK2     |
| 3 | CMC1     |
| 3 | CNN3     |
| 3 | COIL     |
| 3 | CREBL2   |
| 3 | CTC1     |
| 3 | CTDSPL   |
| 3 | DCP1A    |
| 3 | DCUN1D3  |
| 3 | DDX10    |
| 3 | DDX23    |
| 3 | DDX28    |
| 3 | DDX55    |
| 3 | DDX59    |
| 3 | DEPDC7   |
| 3 | DEXI     |
| 3 | DHX32    |
| 3 | DHX35    |
| 3 | DHX40    |
| 3 | DNAJA3   |
| 3 | DOCK4    |

|   |           |
|---|-----------|
| 3 | DQX1      |
| 3 | DTD1      |
| 3 | DTX4      |
| 3 | DTYMK     |
| 3 | DYRK2     |
| 3 | EFCAB11   |
| 3 | EFCAB14   |
| 3 | EIF1B     |
| 3 | EIF2D     |
| 3 | EIF3J     |
| 3 | EIF4A3    |
| 3 | EMILIN2   |
| 3 | ERCC4     |
| 3 | ESF1      |
| 3 | ESRP2     |
| 3 | EXOSC2    |
| 3 | FAM120AOS |
| 3 | FAM149B1  |
| 3 | FAM169A   |
| 3 | FAM178A   |
| 3 | FAM8A1    |
| 3 | FBXO42    |
| 3 | FBXW9     |
| 3 | FICD      |
| 3 | FNTB      |
| 3 | FRMD8     |
| 3 | FRYL      |
| 3 | GAS2      |
| 3 | GEMIN2    |
| 3 | GID8      |
| 3 | GMEB2     |
| 3 | GTF2H5    |
| 3 | GTF3C2    |
| 3 | HELZ      |
| 3 | HNRNPA3   |
| 3 | HNRNPH3   |
| 3 | HNRNPM    |
| 3 | IMP3      |
| 3 | ITM2B     |
| 3 | ITM2C     |
| 3 | JMJD4     |
| 3 | JRKL      |
| 3 | KANK2     |
| 3 | KATNAL1   |
| 3 | KIAA1147  |

|   |         |
|---|---------|
| 3 | LEMD2   |
| 3 | MDN1    |
| 3 | MEST    |
| 3 | METTL1  |
| 3 | METTL10 |
| 3 | METTL2B |
| 3 | METTL7B |
| 3 | MKI67   |
| 3 | MREG    |
| 3 | MTAP    |
| 3 | MTG1    |
| 3 | MUS81   |
| 3 | MYEF2   |
| 3 | MZT1    |
| 3 | NAA50   |
| 3 | NAV2    |
| 3 | NCOA5   |
| 3 | NGDN    |
| 3 | NHLRC3  |
| 3 | NIFK    |
| 3 | NIP7    |
| 3 | NME7    |
| 3 | NOL7    |
| 3 | NOLC1   |
| 3 | NOP10   |
| 3 | NPR2    |
| 3 | NPTXR   |
| 3 | NR2C2AP |
| 3 | NUDCD1  |
| 3 | NUDT16  |
| 3 | NUDT21  |
| 3 | NUP54   |
| 3 | OCEL1   |
| 3 | OMA1    |
| 3 | PAN2    |
| 3 | PAN3    |
| 3 | PARP16  |
| 3 | PASK    |
| 3 | PATL1   |
| 3 | PAXIP1  |
| 3 | PCGF6   |
| 3 | PDCD2L  |
| 3 | PDE6D   |
| 3 | PHF8    |
| 3 | PLD6    |

|   |         |
|---|---------|
| 3 | PNRC2   |
| 3 | POC1A   |
| 3 | POLR1A  |
| 3 | POLR2M  |
| 3 | POLR3A  |
| 3 | POLR3H  |
| 3 | POLR3K  |
| 3 | POP4    |
| 3 | PPA2    |
| 3 | PPAN    |
| 3 | PPIH    |
| 3 | PPIL2   |
| 3 | PRIMPOL |
| 3 | PRKRA   |
| 3 | PRMT6   |
| 3 | PRODH2  |
| 3 | PROSER1 |
| 3 | PRUNE   |
| 3 | PSMD10  |
| 3 | PTCD2   |
| 3 | PUS7L   |
| 3 | RANBP6  |
| 3 | RANGRF  |
| 3 | RBM10   |
| 3 | RBM27   |
| 3 | RBM41   |
| 3 | RBM7    |
| 3 | RBMXL1  |
| 3 | RCL1    |
| 3 | RCOR2   |
| 3 | RCOR3   |
| 3 | REPIN1  |
| 3 | RFWD3   |
| 3 | RIPPLY3 |
| 3 | RMDN1   |
| 3 | RMND5A  |
| 3 | RNPS1   |
| 3 | RPAP1   |
| 3 | RPF1    |
| 3 | RPL27   |
| 3 | RPL34   |
| 3 | RPP14   |
| 3 | RPP25L  |
| 3 | RPRD1B  |
| 3 | RPS15A  |

|   |          |
|---|----------|
| 3 | RQCD1    |
| 3 | RRP1B    |
| 3 | RRP7A    |
| 3 | RRS1     |
| 3 | RTCA     |
| 3 | RUFY1    |
| 3 | RUFY2    |
| 3 | S100A13  |
| 3 | SENP2    |
| 3 | SETD6    |
| 3 | SF3B6    |
| 3 | SLC23A2  |
| 3 | SLC25A16 |
| 3 | SLC25A42 |
| 3 | SLC25A46 |
| 3 | SLC2A4RG |
| 3 | SLC35E3  |
| 3 | SMG6     |
| 3 | SMIM12   |
| 3 | SMU1     |
| 3 | SNRPA1   |
| 3 | SNRPB2   |
| 3 | SNRPF    |
| 3 | SP5      |
| 3 | SPICE1   |
| 3 | SPTSSA   |
| 3 | SRBD1    |
| 3 | SRRD     |
| 3 | SSB      |
| 3 | SUN1     |
| 3 | SUPT16H  |
| 3 | TAF1B    |
| 3 | TAF4     |
| 3 | TAP1     |
| 3 | TARDBP   |
| 3 | TDP1     |
| 3 | TDRD7    |
| 3 | TENC1    |
| 3 | TIGD1    |
| 3 | TIPIN    |
| 3 | TM9SF4   |
| 3 | TMEM14A  |
| 3 | TMEM39A  |
| 3 | TMEM68   |
| 3 | TRIM26   |



|   |         |
|---|---------|
| 3 | TRIM4   |
| 3 | TRMT10C |
| 3 | TSR1    |
| 3 | TTLL12  |
| 3 | UBTD2   |
| 3 | UPF3A   |
| 3 | URI1    |
| 3 | UTP14C  |
| 3 | VWA8    |
| 3 | XPNPEP3 |
| 3 | YAE1D1  |
| 3 | ZBED5   |
| 3 | ZBTB25  |
| 3 | ZBTB37  |
| 3 | ZC3H11A |
| 3 | ZCCHC9  |
| 3 | ZFP36L1 |
| 3 | ZFPM1   |
| 3 | ZGRF1   |
| 3 | ZKSCAN2 |
| 3 | ZMYM1   |
| 3 | ZMYM4   |
| 3 | ZNF143  |
| 3 | ZNF395  |
| 3 | ZNF445  |
| 3 | ZNF514  |
| 3 | ZNF569  |
| 3 | ZNF623  |
| 3 | ZNF696  |
| 3 | ZNF7    |
| 3 | ZNF711  |
| 3 | ZNF76   |
| 3 | ZNF764  |
| 3 | ZNF84   |
| 3 | ZNHIT3  |
| 3 | ZNRD1   |
| 3 | ZSCAN21 |
| 3 | ZSWIM3  |
| 4 | ABHD5   |
| 4 | ACVR2B  |
| 4 | ADD1    |
| 4 | AGAP1   |
| 4 | AGPAT1  |
| 4 | AGT     |
| 4 | AKAP11  |

|   |           |
|---|-----------|
| 4 | ANK2      |
| 4 | ANTXR2    |
| 4 | ANXA4     |
| 4 | AP5S1     |
| 4 | ARHGEF10L |
| 4 | ARHGEF19  |
| 4 | ARHGEF25  |
| 4 | ARHGEF40  |
| 4 | ARPC1B    |
| 4 | ATG14     |
| 4 | ATG16L1   |
| 4 | ATP2B4    |
| 4 | BCAR3     |
| 4 | BCAS1     |
| 4 | BLOC1S3   |
| 4 | BMPR1A    |
| 4 | BNIP3L    |
| 4 | BRAT1     |
| 4 | BTBD1     |
| 4 | C14orf142 |
| 4 | CAPN7     |
| 4 | CASP10    |
| 4 | CCDC71    |
| 4 | CCL20     |
| 4 | CD276     |
| 4 | CD46      |
| 4 | CDS1      |
| 4 | CERS1     |
| 4 | CERS6     |
| 4 | CLDN4     |
| 4 | CLIC4     |
| 4 | CNIH4     |
| 4 | CNNM4     |
| 4 | COTL1     |
| 4 | CPN1      |
| 4 | CTSL      |
| 4 | CTSV      |
| 4 | CYB561    |
| 4 | DAPK1     |
| 4 | DCBLD2    |
| 4 | DDR1      |
| 4 | DFFB      |
| 4 | DUSP28    |
| 4 | DUSP7     |
| 4 | ECD       |

|   |          |
|---|----------|
| 4 | EFNA4    |
| 4 | ELOVL2   |
| 4 | ENOX2    |
| 4 | ESAM     |
| 4 | F11R     |
| 4 | FAM160B2 |
| 4 | FAM204A  |
| 4 | FAM21A   |
| 4 | FILIP1L  |
| 4 | FNIP2    |
| 4 | FOXC1    |
| 4 | FOXJ2    |
| 4 | FST      |
| 4 | GDPD5    |
| 4 | GIPC2    |
| 4 | GNA12    |
| 4 | GNB2     |
| 4 | GNG4     |
| 4 | GOLGA1   |
| 4 | GPR157   |
| 4 | GRK5     |
| 4 | GUCD1    |
| 4 | GXYLT2   |
| 4 | HEATR5B  |
| 4 | HERC1    |
| 4 | HIVEP2   |
| 4 | HPS6     |
| 4 | IL17RB   |
| 4 | IL22RA1  |
| 4 | IMPA1    |
| 4 | INPP1    |
| 4 | INPP4A   |
| 4 | INSIG2   |
| 4 | IPMK     |
| 4 | IQGAP2   |
| 4 | IRAK4    |
| 4 | IRF2     |
| 4 | ITFG2    |
| 4 | ITGA2    |
| 4 | ITGB2    |
| 4 | JKAMP    |
| 4 | KCTD10   |
| 4 | KCTD17   |
| 4 | KCTD5    |
| 4 | KLHL18   |

|   |          |
|---|----------|
| 4 | KLHL2    |
| 4 | KLHL36   |
| 4 | LAMA5    |
| 4 | LIFR     |
| 4 | LMBR1L   |
| 4 | LPGAT1   |
| 4 | LTB4R    |
| 4 | LYZ      |
| 4 | LZIC     |
| 4 | LZTS2    |
| 4 | MAPKAP1  |
| 4 | MICAL2   |
| 4 | MPDZ     |
| 4 | MPZL2    |
| 4 | MTMR1    |
| 4 | MX2      |
| 4 | MYO1D    |
| 4 | MYO9A    |
| 4 | N4BP1    |
| 4 | NAALADL1 |
| 4 | NCOA4    |
| 4 | NDFIP1   |
| 4 | NDFIP2   |
| 4 | NEDD9    |
| 4 | NOL3     |
| 4 | NRBF2    |
| 4 | NT5DC1   |
| 4 | NUCB2    |
| 4 | ONECUT1  |
| 4 | OTULIN   |
| 4 | PDXDC1   |
| 4 | PELI3    |
| 4 | PGAM5    |
| 4 | PHKA2    |
| 4 | PHLPP2   |
| 4 | PI4K2B   |
| 4 | PLAC8    |
| 4 | PLLP     |
| 4 | POGK     |
| 4 | PPP1R3E  |
| 4 | PPP1R9B  |
| 4 | PRR15    |
| 4 | PTGFRN   |
| 4 | PTPRF    |
| 4 | PVRL1    |

|   |          |
|---|----------|
| 4 | PVRL2    |
| 4 | RAB18    |
| 4 | RAB3D    |
| 4 | RAP2C    |
| 4 | RAPGEF5  |
| 4 | RASSF3   |
| 4 | RASSF8   |
| 4 | RBPM5    |
| 4 | RGP1     |
| 4 | RGS19    |
| 4 | RPH3AL   |
| 4 | RUNDC1   |
| 4 | SAYS1    |
| 4 | SERPIN9  |
| 4 | SERPINE2 |
| 4 | SGK2     |
| 4 | SH3BP4   |
| 4 | SHOC2    |
| 4 | SLC12A2  |
| 4 | SLC38A9  |
| 4 | SLC39A6  |
| 4 | SLC44A1  |
| 4 | SMIM15   |
| 4 | SMOC1    |
| 4 | SNAP47   |
| 4 | SOCS7    |
| 4 | SOS2     |
| 4 | SOX18    |
| 4 | SPATA2   |
| 4 | SPATA2L  |
| 4 | SPATC1L  |
| 4 | SPRYD7   |
| 4 | ST20     |
| 4 | STEAP3   |
| 4 | SYNJ2BP  |
| 4 | SYPL1    |
| 4 | TAB2     |
| 4 | TBC1D7   |
| 4 | TBC1D8   |
| 4 | TBCE     |
| 4 | TECPR1   |
| 4 | TGFBR3   |
| 4 | TGIF2    |
| 4 | THEM6    |
| 4 | TJP3     |

|   |           |
|---|-----------|
| 4 | TMEM104   |
| 4 | TMEM42    |
| 4 | TMEM98    |
| 4 | TNFRSF10D |
| 4 | TOLLIP    |
| 4 | TOM1L1    |
| 4 | TPST1     |
| 4 | TRAF3IP2  |
| 4 | TRAF4     |
| 4 | TRIM32    |
| 4 | TRIM38    |
| 4 | TSPAN14   |
| 4 | TTYH3     |
| 4 | TWF1      |
| 4 | UBR7      |
| 4 | VANGL1    |
| 4 | VPS54     |
| 4 | WHAMM     |
| 4 | WIP1      |
| 4 | WNK4      |
| 4 | ZBTB20    |
| 4 | ZHX2      |
| 4 | ZNF101    |
| 4 | ZNF253    |
| 4 | ZNF268    |
| 4 | ZNF37A    |
| 4 | ZNF480    |
| 4 | ZNF772    |
| 4 | ZXDC      |
| 5 | AAED1     |
| 5 | ABCC1     |
| 5 | ABCC6     |
| 5 | ABCD1     |
| 5 | ABCD3     |
| 5 | ACAT2     |
| 5 | ACOX2     |
| 5 | ACSL4     |
| 5 | ACSL5     |
| 5 | ACSM2B    |
| 5 | ADH4      |
| 5 | ADH5      |
| 5 | ADPRM     |
| 5 | AGMAT     |
| 5 | AHSG      |
| 5 | AKR1B10   |

|   |          |
|---|----------|
| 5 | AKR1D1   |
| 5 | ALAS1    |
| 5 | ALG2     |
| 5 | ANKRD16  |
| 5 | ANKRD36B |
| 5 | API5     |
| 5 | APOM     |
| 5 | ARAP1    |
| 5 | ARV1     |
| 5 | ATP7B    |
| 5 | ATRN     |
| 5 | BAG3     |
| 5 | BCAP29   |
| 5 | BHMT     |
| 5 | BPHL     |
| 5 | C15orf41 |
| 5 | C19orf80 |
| 5 | C2orf47  |
| 5 | C4orf3   |
| 5 | CA5A     |
| 5 | CAAP1    |
| 5 | CAPN1    |
| 5 | CBR1     |
| 5 | CD302    |
| 5 | CEACAM1  |
| 5 | CFD      |
| 5 | CLCN6    |
| 5 | CLDND1   |
| 5 | COA1     |
| 5 | COL1A1   |
| 5 | CPN2     |
| 5 | CRYZ     |
| 5 | CTAGE5   |
| 5 | CTSB     |
| 5 | CTSC     |
| 5 | CYSTM1   |
| 5 | DDOST    |
| 5 | DENND5B  |
| 5 | DERA     |
| 5 | DHCR24   |
| 5 | DHRS1    |
| 5 | DHRS2    |
| 5 | DNAJB11  |
| 5 | DNAJC3   |
| 5 | DOLK     |

|   |         |
|---|---------|
| 5 | DPYSL2  |
| 5 | EDEM2   |
| 5 | EDEM3   |
| 5 | ELMOD3  |
| 5 | ELOVL6  |
| 5 | EML4    |
| 5 | ERGIC1  |
| 5 | ERGIC2  |
| 5 | EXT2    |
| 5 | F5      |
| 5 | FABP5   |
| 5 | FAHD2A  |
| 5 | FAM101B |
| 5 | FAM126B |
| 5 | FAM73A  |
| 5 | GBAS    |
| 5 | GGT1    |
| 5 | GK      |
| 5 | GLDC    |
| 5 | GLOD4   |
| 5 | GLT8D1  |
| 5 | GLUL    |
| 5 | GMPPB   |
| 5 | GNS     |
| 5 | GOLGA3  |
| 5 | GOLGA8B |
| 5 | GOLT1B  |
| 5 | GPX3    |
| 5 | GSR     |
| 5 | GSTA1   |
| 5 | HAGH    |
| 5 | HECTD4  |
| 5 | HEPACAM |
| 5 | HEXB    |
| 5 | HP      |
| 5 | HS6ST1  |
| 5 | HSD17B2 |
| 5 | IGFBP1  |
| 5 | IMPA2   |
| 5 | IMPACT  |
| 5 | ISOC1   |
| 5 | KLF15   |
| 5 | LACTB2  |
| 5 | LANCL1  |
| 5 | LARP4B  |



|   |           |
|---|-----------|
| 5 | LGALS3    |
| 5 | LIPA      |
| 5 | LMAN2L    |
| 5 | LNK2      |
| 5 | LRP4      |
| 5 | LRRC42    |
| 5 | LRRC8E    |
| 5 | MAOB      |
| 5 | MAPK1IP1L |
| 5 | MASP2     |
| 5 | MAST2     |
| 5 | MCU       |
| 5 | MESDC1    |
| 5 | MESDC2    |
| 5 | MFI2      |
| 5 | MFSD3     |
| 5 | MGAT4A    |
| 5 | MGST1     |
| 5 | MGST2     |
| 5 | MGST3     |
| 5 | MINPP1    |
| 5 | MOGS      |
| 5 | MPV17L    |
| 5 | MSRB1     |
| 5 | NAGPA     |
| 5 | NCEH1     |
| 5 | NCF2      |
| 5 | NMRAL1    |
| 5 | NPAS2     |
| 5 | OLFML3    |
| 5 | OSBPL8    |
| 5 | OSTM1     |
| 5 | OXER1     |
| 5 | PAFAH2    |
| 5 | PALM      |
| 5 | PANX1     |
| 5 | PDCL      |
| 5 | PFKFB2    |
| 5 | PIP4K2B   |
| 5 | PIP4K2C   |
| 5 | PIR       |
| 5 | PISD      |
| 5 | PITPNM2   |
| 5 | PKDCC     |
| 5 | PLA2G12B  |

|   |           |
|---|-----------|
| 5 | PLA2G2A   |
| 5 | POMGNT1   |
| 5 | POMGNT2   |
| 5 | PPP1R12C  |
| 5 | PREB      |
| 5 | PTGR1     |
| 5 | PTPN4     |
| 5 | PTS       |
| 5 | PXDC1     |
| 5 | RDH10     |
| 5 | RFT1      |
| 5 | RILPL2    |
| 5 | RTN4IP1   |
| 5 | RWDD1     |
| 5 | SAMD4B    |
| 5 | SCML1     |
| 5 | SCP2      |
| 5 | SDF2      |
| 5 | SEC16A    |
| 5 | SEC24B    |
| 5 | SEMA4F    |
| 5 | SEPP1     |
| 5 | SERPINA10 |
| 5 | SERPINC1  |
| 5 | SFT2D3    |
| 5 | SGSH      |
| 5 | SIMC1     |
| 5 | SLC22A3   |
| 5 | SLC25A44  |
| 5 | SLC27A4   |
| 5 | SLC29A4   |
| 5 | SLC30A3   |
| 5 | SLC30A5   |
| 5 | SLC35B1   |
| 5 | SLC39A11  |
| 5 | SLC39A14  |
| 5 | SLCO4A1   |
| 5 | SMIM20    |
| 5 | SOAT1     |
| 5 | STARD4    |
| 5 | STARD5    |
| 5 | STARD9    |
| 5 | STEAP2    |
| 5 | SULT1A1   |
| 5 | TEF       |

|   |          |
|---|----------|
| 5 | TF       |
| 5 | TLDC1    |
| 5 | TMCC1    |
| 5 | TMEM150A |
| 5 | TMEM184B |
| 5 | TMEM187  |
| 5 | TMEM5    |
| 5 | TMEM86B  |
| 5 | TOMM40L  |
| 5 | TP53INP2 |
| 5 | TRAPPC11 |
| 5 | TRAPPC6A |
| 5 | TSPAN13  |
| 5 | TSPAN33  |
| 5 | TULP4    |
| 5 | TYRO3    |
| 5 | UGT2B7   |
| 5 | VASN     |
| 5 | XYLT2    |
| 5 | ZDHHC17  |
| 5 | ZNF200   |
| 5 | ZNF248   |
| 5 | ZNF260   |
| 5 | ZNF319   |
| 5 | ZNF557   |
| 5 | ZNF574   |
| 5 | ZNF592   |
| 5 | ZNF646   |
| 5 | ZNF687   |
| 6 | AASDH    |
| 6 | ABAT     |
| 6 | ACAD9    |
| 6 | ACADM    |
| 6 | ACN9     |
| 6 | ACP2     |
| 6 | ADAT2    |
| 6 | ADNP2    |
| 6 | AFMID    |
| 6 | AHSA2    |
| 6 | ALG14    |
| 6 | ALG6     |
| 6 | ALG8     |
| 6 | ANKEF1   |
| 6 | ANKRD13D |
| 6 | APOL1    |

|   |          |
|---|----------|
| 6 | APOOL    |
| 6 | ARL8A    |
| 6 | ARSB     |
| 6 | ARSK     |
| 6 | ASL      |
| 6 | ATP5L    |
| 6 | ATPAF1   |
| 6 | B3GNTL1  |
| 6 | B4GALT4  |
| 6 | B4GALT7  |
| 6 | BOLA3    |
| 6 | C10orf10 |
| 6 | C16orf91 |
| 6 | C19orf10 |
| 6 | C1GALT1  |
| 6 | C1orf174 |
| 6 | C1orf226 |
| 6 | C4orf32  |
| 6 | C6orf203 |
| 6 | CARKD    |
| 6 | CASD1    |
| 6 | CBR4     |
| 6 | CCBL1    |
| 6 | CCBL2    |
| 6 | CCDC115  |
| 6 | CDC42BPA |
| 6 | CDK5RAP1 |
| 6 | CDYL     |
| 6 | CEMIP    |
| 6 | CHCHD3   |
| 6 | CHPF2    |
| 6 | CHST13   |
| 6 | CHST14   |
| 6 | CHST15   |
| 6 | CHST7    |
| 6 | CHSY1    |
| 6 | CLNS1A   |
| 6 | CLPX     |
| 6 | CNPY4    |
| 6 | COA6     |
| 6 | COLGALT1 |
| 6 | COQ6     |
| 6 | COX17    |
| 6 | COX18    |
| 6 | CREB3L2  |

|   |         |
|---|---------|
| 6 | CRTC3   |
| 6 | CYB5A   |
| 6 | CYB5B   |
| 6 | DDC     |
| 6 | DLST    |
| 6 | DNAJA1  |
| 6 | DNAJA2  |
| 6 | DNAJB9  |
| 6 | DNAJC11 |
| 6 | DOK6    |
| 6 | DPY19L4 |
| 6 | EIF1AD  |
| 6 | ENPP3   |
| 6 | ERLIN1  |
| 6 | ERP44   |
| 6 | FAM120A |
| 6 | FAM184A |
| 6 | FKBP14  |
| 6 | FRMD3   |
| 6 | GALE    |
| 6 | GALK2   |
| 6 | GCAT    |
| 6 | GLA     |
| 6 | GLRX    |
| 6 | GLRX3   |
| 6 | GMCL1   |
| 6 | GOLT1A  |
| 6 | GYG2    |
| 6 | HADH    |
| 6 | HEMK1   |
| 6 | HIBCH   |
| 6 | HIF1AN  |
| 6 | HLF     |
| 6 | HMGXB3  |
| 6 | HOGA1   |
| 6 | HPCAL1  |
| 6 | IDNK    |
| 6 | IGFBP7  |
| 6 | ISCA2   |
| 6 | L2HGDH  |
| 6 | LIPT1   |
| 6 | LIX1L   |
| 6 | LRIG2   |
| 6 | MANEAL  |
| 6 | MARC1   |

|   |         |
|---|---------|
| 6 | MARC2   |
| 6 | METTL17 |
| 6 | MIPEP   |
| 6 | MMD     |
| 6 | MOCS1   |
| 6 | MOCS2   |
| 6 | MPPE1   |
| 6 | MRI1    |
| 6 | MRPL19  |
| 6 | MRPL32  |
| 6 | MRPL34  |
| 6 | MRPL45  |
| 6 | MRPL46  |
| 6 | MRPL49  |
| 6 | MRPL50  |
| 6 | MRPS22  |
| 6 | MRPS36  |
| 6 | MT-ND1  |
| 6 | MTFR1   |
| 6 | MTR     |
| 6 | MTX3    |
| 6 | N6AMT1  |
| 6 | NAA16   |
| 6 | NAAA    |
| 6 | NBPF11  |
| 6 | NCLN    |
| 6 | NDUFA8  |
| 6 | NDUFAF1 |
| 6 | NDUFAF4 |
| 6 | NEU3    |
| 6 | NFS1    |
| 6 | NHLRC2  |
| 6 | NUBPL   |
| 6 | NUS1    |
| 6 | OAF     |
| 6 | OGDH    |
| 6 | OXLD1   |
| 6 | P4HA1   |
| 6 | PANK3   |
| 6 | PAQR7   |
| 6 | PCMT1   |
| 6 | PDHB    |
| 6 | PDXK    |
| 6 | PEPD    |
| 6 | PFAS    |

|   |          |
|---|----------|
| 6 | PGAP3    |
| 6 | PGM1     |
| 6 | PGM2     |
| 6 | PIGB     |
| 6 | PIGF     |
| 6 | PIGK     |
| 6 | PIGO     |
| 6 | PIGV     |
| 6 | PIGW     |
| 6 | PIGZ     |
| 6 | PM20D2   |
| 6 | PPCDC    |
| 6 | PPP1R12B |
| 6 | PPTC7    |
| 6 | PROSC    |
| 6 | PYCR2    |
| 6 | PYURF    |
| 6 | QTRT1    |
| 6 | QTRTD1   |
| 6 | RBM17    |
| 6 | RFK      |
| 6 | RHBDL2   |
| 6 | RMND1    |
| 6 | RPIA     |
| 6 | RPUSD2   |
| 6 | SCAMP5   |
| 6 | SDHAF1   |
| 6 | SEC11C   |
| 6 | SEC61G   |
| 6 | SEPHS2   |
| 6 | SHMT1    |
| 6 | SLC26A2  |
| 6 | SLC35A2  |
| 6 | SLC35D1  |
| 6 | SLC35F5  |
| 6 | SLC35F6  |
| 6 | SLC5A9   |
| 6 | SNX29    |
| 6 | SORD     |
| 6 | SOX13    |
| 6 | SPRTN    |
| 6 | SQRDL    |
| 6 | SRP19    |
| 6 | SRPRB    |
| 6 | SSR3     |

|   |            |
|---|------------|
| 6 | ST3GAL6    |
| 6 | ST6GALNAC6 |
| 6 | SYAP1      |
| 6 | TCOF1      |
| 6 | THADA      |
| 6 | THAP5      |
| 6 | THUMPD2    |
| 6 | TIMM9      |
| 6 | TMEM129    |
| 6 | TMEM2      |
| 6 | TMEM230    |
| 6 | TMEM70     |
| 6 | TMTC4      |
| 6 | TNRC18     |
| 6 | TP53I13    |
| 6 | TPST2      |
| 6 | TRAM1      |
| 6 | TRIT1      |
| 6 | TRNAU1AP   |
| 6 | TSFM       |
| 6 | TTC28      |
| 6 | TTC31      |
| 6 | TTC7A      |
| 6 | TYW1       |
| 6 | UFL1       |
| 6 | UGGT2      |
| 6 | UMPS       |
| 6 | USP31      |
| 6 | VBP1       |
| 6 | VIMP       |
| 6 | WDR11      |
| 6 | WDYHV1     |
| 6 | YY1AP1     |
| 6 | ZBED3      |
| 6 | ZC3H12A    |
| 6 | ZCCHC24    |
| 6 | ZFYVE19    |
| 6 | ZMYM5      |
| 6 | ZNF232     |
| 6 | ZNF26      |
| 6 | ZNF407     |
| 6 | ZNF500     |
| 6 | ZNF561     |
| 6 | ZNF706     |
| 6 | ZNF740     |





**Table S15.** GO terms and KEGG pathways of STRING clusters of mRNAs regulated by miR-512-3p.

| STRING Cluster | Category                   | Term       | Description               | p-value  | Genes                                                                                                                                                                                                         |
|----------------|----------------------------|------------|---------------------------|----------|---------------------------------------------------------------------------------------------------------------------------------------------------------------------------------------------------------------|
| 1              | GO Term Biological Process | GO:0051301 | cell division             | 1.79E-11 | ERCC6L, SDCCAG3, CDCA3, CCNF, TUBA1B, DSN1, CCNB1, KNTC1, NEK2, FAM83D, CDK19, BORA, RCC2, HAUS3, MASTL, KNSTRN, NDC80, MAU2, CENPF, KIF18B, MIS18A, CCNY, KIFC1, CENPJ, BIRC5, FAM64A, MAPRE1, ANAPC1, NUP37 |
|                | GO Term Biological Process | GO:0007062 | sister chromatid cohesion | 3.09E-08 | ERCC6L, RCC2, DDX11, CENPA, NDC80, CENPF, DSN1, RAD51C, CENPH, BIRC5, KNTC1, MAPRE1, NUP37, NDEL1                                                                                                             |
|                | KEGG Pathway               | hsa03460   | Fanconi anemia pathway    | 7.22E-08 | RMI2, RAD51C, FANCM, EME1, FANCL, UBE2T, RPA3, FANCC, FANCG                                                                                                                                                   |

|  |                                           |            |                                      |          |                                                                                                                                     |
|--|-------------------------------------------|------------|--------------------------------------|----------|-------------------------------------------------------------------------------------------------------------------------------------|
|  | <b>GO Term<br/>Biological<br/>Process</b> | GO:0000070 | mitotic sister chromatid segregation | 1.47E-07 | DSN1, KIF18B, ESPL1, KIFC1, NEK2, KNSTRN, CENPA, NDC80                                                                              |
|  | <b>GO Term<br/>Biological<br/>Process</b> | GO:0007067 | mitotic nuclear division             | 4.41E-07 | ERCC6L, BORA, CDCA3, RCC2, CCNF, HAUS3, MASTL, NDC80, CENPF, MIS18A, PBK, BIRC5, KNTC1, FAM64A, NEK2, MAPRE1, FAM83D, ANAPC1, NUP37 |
|  | <b>GO Term<br/>Molecular<br/>Function</b> | GO:0061630 | ubiquitin protein ligase activity    | 1.87E-06 | RNF43, RNF14, UHRF1, FANCL, RNF38, RNF6, MARCH8, MED18, MED17, RNF138, UBE2T, MED20, TRIM37, RFFL, CBLL1                            |
|  | <b>GO Term<br/>Cellular<br/>Component</b> | GO:0000777 | condensed chromosome kinetochore     | 2.76E-06 | DCTN6, ERCC6L, CENPH, FBXO28, BIRC5, KNTC1, NEK2, KNSTRN, NDC80, NDEL1, NUP37                                                       |

|  |                                           |            |                                       |          |                                                                                                                                                                          |
|--|-------------------------------------------|------------|---------------------------------------|----------|--------------------------------------------------------------------------------------------------------------------------------------------------------------------------|
|  | <b>GO Term<br/>Biological<br/>Process</b> | GO:0000086 | G2/M transition of mitotic cell cycle | 7.17E-06 | BORA, HAUS3, MASTL, DYNLL1, TUBG1, CCNB1, CCNY, CENPJ, BIRC5, FGFR1OP, NEK2, MAPRE1, NINL                                                                                |
|  | <b>GO Term<br/>Cellular<br/>Component</b> | GO:0005813 | centrosome                            | 7.54E-06 | DCTN6, UVRAG, LRRC45, ANKRD26, ERCC6L, STIL, DDX11, HAUS3, MASTL, DYNLL1, TUBG1, IFT74, CENPF, CCNB1, ESPL1, KIAA0586, CENPJ, MCM3, FGFR1OP, NEK2, CCDC77, MAPRE1, NDEL1 |
|  | <b>GO Term<br/>Cellular<br/>Component</b> | GO:0005874 | microtubule                           | 1.02E-05 | RCC2, HAUS3, TUBE1, SHROOM1, DYNLL1, TUBG1, TUBA1B, KIF18B, KIFC1, CENPJ, KIF13B, BIRC5, NEK2, KIF20A, MAPRE1, NINL, DNAL4, NDEL1                                        |
|  | <b>GO Term<br/>Biological<br/>Process</b> | GO:0007059 | chromosome segregation                | 3.94E-05 | UVRAG, CENPF, DSN1, MIS18A, NEK2, ESCO2, KNSTRN, NDC80, NDEL1                                                                                                            |

|                                           |            |                                        |          |                                                                                                                           |
|-------------------------------------------|------------|----------------------------------------|----------|---------------------------------------------------------------------------------------------------------------------------|
| <b>GO Term<br/>Molecular<br/>Function</b> | GO:0004842 | ubiquitin-protein transferase activity | 4.54E-05 | RNF43, AREL1, RNF14, UHRF1, FANCL, KLHL26, RNF38, KLHL28, RNF6, MARCH8, FBXO21, UBE2T, FBXO3, BIRC5, TRIM37, CBLL1, FBXO9 |
| <b>GO Term<br/>Cellular<br/>Component</b> | GO:0000776 | kinetochore                            | 8.94E-05 | CENPF, CENPH, FBXO28, NEK2, DYNLL1, KNSTRN, NDC80, NDEL1, NUP37                                                           |
| <b>GO Term<br/>Cellular<br/>Component</b> | GO:0030496 | midbody                                | 1.10E-04 | UVRAG, CENPF, SDCCAG3, RAP2A, PRC1, RCC2, DDX11, BIRC5, NEK2, KIF20A, MYH10                                               |
| <b>GO Term<br/>Biological<br/>Process</b> | GO:0036297 | interstrand cross-link repair          | 1.43E-04 | FANCM, EME1, FANCL, UBE2T, RPA3, FANCC, FANCG                                                                             |
| <b>GO Term<br/>Cellular<br/>Component</b> | GO:0000922 | spindle pole                           | 1.51E-04 | GPSM2, CENPF, CCNB1, DSN1, PRC1, DDX11, PLEKHG6, KNTC1, NEK2, KNSTRN                                                      |

|  |                                           |            |                                                 |          |                                                                                                                             |
|--|-------------------------------------------|------------|-------------------------------------------------|----------|-----------------------------------------------------------------------------------------------------------------------------|
|  | <b>GO Term<br/>Cellular<br/>Component</b> | GO:0005819 | spindle                                         | 2.32E-04 | CENPF, KIFC1, PRC1, HAUS3,<br>MAD2L1BP, BIRC5, KIF20A, MAPRE1,<br>MYH10, NDEL1                                              |
|  | <b>GO Term<br/>Biological<br/>Process</b> | GO:0000132 | establishment of mitotic spindle<br>orientation | 3.82E-04 | GPSM2, CENPA, NDC80, MCPH1,<br>NDEL1                                                                                        |
|  | <b>GO Term<br/>Molecular<br/>Function</b> | GO:0016874 | ligase activity                                 | 3.87E-04 | RNF43, AREL1, RNF14, UHRF1,<br>FANCL, RNF38, MARCH9, RNF6,<br>UBE4B, MARCH8, RNF138, TRIM37,<br>RFFL, CBLL1                 |
|  | <b>GO Term<br/>Cellular<br/>Component</b> | GO:0000151 | ubiquitin ligase complex                        | 4.24E-04 | RNF14, MED20, DCUN1D1, UBE4B,<br>FBXO21, CBLL1, MED18, MED17,<br>FBXO9                                                      |
|  | <b>GO Term<br/>Biological<br/>Process</b> | GO:0016567 | protein ubiquitination                          | 4.71E-04 | RNF43, CDCA3, RNF14, KLHL26,<br>CCNF, RNF38, MARCH9, FBXO21,<br>MED18, MED17, DCAF16, RNF138,<br>MED20, BIRC5, CBLL1, FBXO9 |

|  |                                  |            |                 |          |                                                                                                                                                                                                                                                                                                                                                                                                                                                                                                                                                                                                                                                                                                                                                                                                                                                                                                                                                       |
|--|----------------------------------|------------|-----------------|----------|-------------------------------------------------------------------------------------------------------------------------------------------------------------------------------------------------------------------------------------------------------------------------------------------------------------------------------------------------------------------------------------------------------------------------------------------------------------------------------------------------------------------------------------------------------------------------------------------------------------------------------------------------------------------------------------------------------------------------------------------------------------------------------------------------------------------------------------------------------------------------------------------------------------------------------------------------------|
|  | GO Term<br>Molecular<br>Function | GO:0005515 | protein binding | 5.36E-04 | ZNF572, ERCC6L, NAB2, CCNF, FBXO28, TESK1, ELK1, EME1, FBXO3, KNTC1, NEK2, OSTF1, ANKS1A, FBXO9, ACVR1, RNF43, ABCG8, KDM2A, BORA, FKBPL, DDX11, TAP2, TRAFD1, ACYP2, ZBTB33, KNSTRN, SAP30, UHMK1, MAU2, CCNY, RRAGC, RFX5, FAM64A, KIF20A, RIN1, CBLL1, LLGL1, CDCA3, HPN, DCUN1D1, RAP1GAP, DSN1, CCNB1, ORC6, PPP4C, SEC14L1, CSTF1, SLC38A7, FAM83D, MYH10, HEXIM2, UVRAG, STIL, ANKRD27, FANCM, FANCL, FZD4, RCC2, CBX2, MAD2L1BP, ZNF32, FANCC, SMARCA1, FANCG, NDC80, ZBTB9, DIAPH1, MOB1A, KIF18B, FGFR1OP, CEP83, CRIPAK, REEP6, CNOT8, INTS9, DNAL4, MON1B, INTS12, LIN54, GPSM2, FEN1, HIP1, RNF14, PHF1, ARHGAP1, MCM10, PKD2, MED18, RAB22A, MED17, TUBA1B, BCL7B, KIF13B, PBK, SPG11, NINL, DLGAP5, NDEL1, IKBIP, TSC22D4, LRRC45, PLEKHG6, HAUS3, TUBG1, KIF7, DYNLL1, RAD23B, MED29, RAP2A, RAD51C, MRAS, ESPL1, MED20, MCM3, C19ORF25, BIRC5, MAPRE1, MCPH1, CHMP5, WDR27, SDCCAG3, UHRF1, PKN3, RNF6, FOXK1, CENPA, RAB21, DCAF16, |
|--|----------------------------------|------------|-----------------|----------|-------------------------------------------------------------------------------------------------------------------------------------------------------------------------------------------------------------------------------------------------------------------------------------------------------------------------------------------------------------------------------------------------------------------------------------------------------------------------------------------------------------------------------------------------------------------------------------------------------------------------------------------------------------------------------------------------------------------------------------------------------------------------------------------------------------------------------------------------------------------------------------------------------------------------------------------------------|

|  |  |  |  |  |                                                                                                                                                                                                    |
|--|--|--|--|--|----------------------------------------------------------------------------------------------------------------------------------------------------------------------------------------------------|
|  |  |  |  |  | ARVCF, ARL13B, RNF138, FCHO2,<br>ZNF747, ZNF227, IGF2BP3, RBBP7,<br>RFFL, PDLIM5, RRM2, DAB2IP,<br>ARID3A, TBX2, CENPF, MIS18A,<br>CENPH, PRC1, CENPJ, SHKBP1, RPA3,<br>TRIM37, LGR4, SNTB1, NUP37 |
|--|--|--|--|--|----------------------------------------------------------------------------------------------------------------------------------------------------------------------------------------------------|



|  |                                           |            |                           |          |                                                                                                                     |
|--|-------------------------------------------|------------|---------------------------|----------|---------------------------------------------------------------------------------------------------------------------|
|  | <b>GO Term<br/>Biological<br/>Process</b> | GO:0060271 | cilium morphogenesis      | 5.58E-04 | SPAG16, IFT74, ARL13B, TMEM138,<br>KIAA0586, TTC21B, WDR19, CEP83,<br>DYNLL1, PTPDC1                                |
|  | <b>GO Term<br/>Molecular<br/>Function</b> | GO:0005096 | GTPase activator activity | 6.51E-04 | ANKRD27, GRTP1, ELMOD2,<br>PLEKHG6, DAB2IP, ARHGAP1,<br>ARHGAP19, ARHGAP18, RAP1GAP,<br>DEPDC1B, RIN1, AGFG2, LLGL1 |
|  | <b>GO Term<br/>Molecular<br/>Function</b> | GO:0003924 | GTPase activity           | 7.81E-04 | RAB21, RAP2A, TUBA1B, RAB31,<br>MRAS, RRAGC, RABL2A, RABL2B,<br>TUBE1, TUBG1, RAP1GAP, RAB22A                       |

|  |                                  |            |             |            |                                                                                                                                                                                                                                                                                                                                                                                                                                                                                                     |
|--|----------------------------------|------------|-------------|------------|-----------------------------------------------------------------------------------------------------------------------------------------------------------------------------------------------------------------------------------------------------------------------------------------------------------------------------------------------------------------------------------------------------------------------------------------------------------------------------------------------------|
|  | GO Term<br>Cellular<br>Component | GO:0005654 | nucleoplasm | 0.00123047 | <p>INTS12, LIN54, ERCC6L, FEN1, PHF1, MCM10, ELK1, PTPDC1, MED17, EME1, FBXO3, ANKS1A, LMCD1, TRIM66, LIN52, LRRC45, RMI2, KDM2A, DDX11, HAUS3, ESCO2, ZBTB33, MASTL, RAD23B, MED29, SAP30, VWA9, MAU2, RAD51C, MED20, MCM3, BIRC5, KIF20A, ANAPC1, MCPH1, WDR27, PRIM1, RNF38, RNF6, CENPA, CCNB1, PPP4C, ORC6, CSTF1, RHPN2, RBBP7, RFFL, GINS1, HEXIM2, RRM2, FANCM, FANCL, GINS3, CBX2, WDR19, FANCC, ARID3A, FANCG, CENPF, MIS18A, CENPH, PRC1, UBE2T, RPA3, TADA1, GTF2IRD1, INTS9, NUP37</p> |
|--|----------------------------------|------------|-------------|------------|-----------------------------------------------------------------------------------------------------------------------------------------------------------------------------------------------------------------------------------------------------------------------------------------------------------------------------------------------------------------------------------------------------------------------------------------------------------------------------------------------------|

|  |                                           |            |                                 |            |                                                                                   |
|--|-------------------------------------------|------------|---------------------------------|------------|-----------------------------------------------------------------------------------|
|  | <b>GO Term<br/>Biological<br/>Process</b> | GO:0032006 | regulation of TOR signaling     | 0.00128459 | RRAGC, RFFL, FAM83D, FBXO9                                                        |
|  | <b>GO Term<br/>Cellular<br/>Component</b> | GO:0005871 | kinesin complex                 | 0.00136946 | KIF18B, KIFC1, KIF13B, KIF20A, KIF7, NDEL1                                        |
|  | <b>GO Term<br/>Cellular<br/>Component</b> | GO:0043240 | Fanconi anaemia nuclear complex | 0.00165187 | FANCM, FANCL, FANCC, FANCG                                                        |
|  | <b>GO Term<br/>Biological<br/>Process</b> | GO:0006260 | DNA replication                 | 0.00177909 | FEN1, RMI2, RRM2, CHTF8, ORC6, GINS3, RPA3, MCM3, MCM10, RBBP7                    |
|  | <b>GO Term<br/>Biological<br/>Process</b> | GO:0006281 | DNA repair                      | 0.0027396  | INO80C, UVRAG, FEN1, RAD51C, EME1, FANCL, UHRF1, UBE2T, RPA3, DDX11, FANCC, FANCG |
|  | <b>GO Term<br/>Molecular<br/>Function</b> | GO:0003697 | single-stranded DNA binding     | 0.00314569 | RAD51C, RNF138, PRIM1, RPA3, DDX11, MCM10, RAD23B                                 |
|  | <b>GO Term<br/>Cellular<br/>Component</b> | GO:0000775 | chromosome, centromeric region  | 0.00342417 | UVRAG, CENPF, MIS18A, BIRC5, CENPA, NDC80                                         |
|  | <b>GO Term<br/>Biological<br/>Process</b> | GO:0007224 | smoothened signaling pathway    | 0.0036904  | STIL, ARL13B, KIAA0586, TTC21B, CENPJ, PTPDC1                                     |

|                                           |            |                                                                                        |            |                                                                                                             |
|-------------------------------------------|------------|----------------------------------------------------------------------------------------|------------|-------------------------------------------------------------------------------------------------------------|
| <b>GO Term<br/>Biological<br/>Process</b> | GO:0042787 | protein ubiquitination involved in<br>ubiquitin-dependent protein<br>catabolic process | 0.00440525 | RNF43, CCNB1, AREL1, RNF14,<br>UHRF1, KLHL28, UBE4B, RFFL,<br>ANAPC1                                        |
| <b>GO Term<br/>Biological<br/>Process</b> | GO:0007264 | small GTPase mediated signal<br>transduction                                           | 0.00481253 | RAB21, RAP2A, RAB31, MRAS,<br>RRAGC, ARL13B, RABL2A, ARHGAP1,<br>RABL2B, ARHGAP18, RAB22A                   |
| <b>GO Term<br/>Molecular<br/>Function</b> | GO:0008017 | microtubule binding                                                                    | 0.00531502 | KIF18B, KIFC1, PRC1, RCC2, KIF13B,<br>BIRC5, KIF20A, FAM83D, KIF7, NDEL1                                    |
| <b>GO Term<br/>Molecular<br/>Function</b> | GO:0019901 | protein kinase binding                                                                 | 0.00647089 | BORA, RCC2, DAB2IP, CCNB1, CCNY,<br>RNF138, PRC1, CENPJ, KIF13B,<br>FGFR1OP, KIF20A, FAM83D, RFFL,<br>LLGL1 |
| <b>GO Term<br/>Molecular<br/>Function</b> | GO:0003777 | microtubule motor activity                                                             | 0.00653846 | KIF18B, KIFC1, KIF13B, KIF20A, KIF7,<br>DNAL4                                                               |
| <b>GO Term<br/>Cellular<br/>Component</b> | GO:0072686 | mitotic spindle                                                                        | 0.00664357 | DIAPH1, ESPL1, PKD2, DYNLL1,<br>KNSTRN                                                                      |

|                                           |            |                                       |            |                                                                          |
|-------------------------------------------|------------|---------------------------------------|------------|--------------------------------------------------------------------------|
| <b>GO Term<br/>Cellular<br/>Component</b> | GO:0005929 | cilium                                | 0.00700748 | IFT74, ARL13B, TMEM138, TTC21B,<br>WDR19, KIF7, PKD2, DNAL4              |
| <b>GO Term<br/>Cellular<br/>Component</b> | GO:0097542 | ciliary tip                           | 0.00725484 | IFT74, TTC21B, WDR19, KIF7, DYNLL1                                       |
| <b>KEGG<br/>Pathway</b>                   | hsa03030   | DNA replication                       | 0.00807608 | FEN1, PRIM1, RPA3, MCM3                                                  |
| <b>GO Term<br/>Biological<br/>Process</b> | GO:0007018 | microtubule-based movement            | 0.00854452 | KIF18B, KIFC1, KIF13B, KIF20A, KIF7,<br>DNAL4                            |
| <b>GO Term<br/>Biological<br/>Process</b> | GO:0000082 | G1/S transition of mitotic cell cycle | 0.00864605 | ACVR1, RRM2, ORC6, PRIM1, RPA3,<br>MCM3, MCM10                           |
| <b>GO Term<br/>Biological<br/>Process</b> | GO:0035721 | intraciliary retrograde transport     | 0.00920343 | TTC21B, WDR19, DYNLL1                                                    |
| <b>GO Term<br/>Cellular<br/>Component</b> | GO:0030424 | axon                                  | 0.00951969 | DAB2IP, SLC38A7, KIF13B, RNF6,<br>SPG11, MYH10, RAP1GAP, LLGL1,<br>UHMK1 |
| <b>GO Term<br/>Biological<br/>Process</b> | GO:0051310 | metaphase plate congression           | 0.01168684 | CENPF, FAM83D, NDC80                                                     |
| <b>GO Term<br/>Cellular<br/>Component</b> | GO:0005814 | centriole                             | 0.01215083 | STIL, KIAA0586, CENPJ, CCNF, BIRC5,<br>CEP83, TUBG1                      |

|  |                                  |            |         |            |                                                                                                                                                                                                                                                                                                                                                                                                                                                                                                                                                                                                                                                                                                                                     |
|--|----------------------------------|------------|---------|------------|-------------------------------------------------------------------------------------------------------------------------------------------------------------------------------------------------------------------------------------------------------------------------------------------------------------------------------------------------------------------------------------------------------------------------------------------------------------------------------------------------------------------------------------------------------------------------------------------------------------------------------------------------------------------------------------------------------------------------------------|
|  | GO Term<br>Cellular<br>Component | GO:0005634 | nucleus | 0.01385545 | <p>ZNF572, NAB2, CCNF, ELK1, PTPDC1, EME1, KNTC1, NEK2, ZBTB39, AREL1, KDM2A, DDX11, UBE4B, ZBTB33, ESCO2, KNSTRN, UHMK1, MAU2, CCNY, RRAGC, RFX5, FAM64A, DCUN1D1, ARHGAP19, DSN1, CCNB1, ORC6, CHTF8, PPP4C, CSTF1, MYH10, HEXIM2, CDK19, RCC2, CBX2, MAD2L1BP, ZNF32, FANCC, SMARCA1, NDC80, ZBTB9, KIF18B, UBE2T, FGFR1OP, CRIPAK, GTF2IRD1, REEP6, CNOT8, SPAG16, FEN1, HIP1, RNF14, PHF1, MCM10, MED17, PBK, LMCD1, DLGAP5, ZNF587B, TSC22D4, RMI2, ZNF362, MASTL, DYNLL1, RAD23B, RAD51C, ESPL1, KIFC1, MCM3, BIRC5, CHMP5, MYRF, UHRF1, PKN3, RNF38, RNF6, FOXK1, CENPA, IFT74, ARVCF, RNF138, ATOH8, ZNF227, IGF2BP3, RBBP7, GINS1, RRM2, ATAD5, GINS3, ARID3A, TBX2, CENPF, MIS18A, CENPH, PRC1, RPA3, ZNF354A, NUP37</p> |
|--|----------------------------------|------------|---------|------------|-------------------------------------------------------------------------------------------------------------------------------------------------------------------------------------------------------------------------------------------------------------------------------------------------------------------------------------------------------------------------------------------------------------------------------------------------------------------------------------------------------------------------------------------------------------------------------------------------------------------------------------------------------------------------------------------------------------------------------------|

|                                           |            |                                |            |                                                             |
|-------------------------------------------|------------|--------------------------------|------------|-------------------------------------------------------------|
| <b>GO Term<br/>Cellular<br/>Component</b> | GO:0016235 | aggresome                      | 0.01391293 | ORC6, CCZ1B, TRIM37, TRIM66                                 |
| <b>GO Term<br/>Cellular<br/>Component</b> | GO:0005815 | microtubule organizing center  | 0.0151727  | DIAPH1, PPP4C, KIFC1, PHF1,<br>FGFR1OP, NINL, DLGAP5, MCPH1 |
| <b>GO Term<br/>Molecular<br/>Function</b> | GO:0003688 | DNA replication origin binding | 0.01632257 | ORC6, DDX11, MCM10                                          |
| <b>GO Term<br/>Biological<br/>Process</b> | GO:0007052 | mitotic spindle organization   | 0.01686299 | GPSM2, STIL, CCNB1, NDC80                                   |
| <b>GO Term<br/>Biological<br/>Process</b> | GO:0051382 | kinetochore assembly           | 0.01741763 | CENPF, CENPH, CENPA                                         |
| <b>GO Term<br/>Cellular<br/>Component</b> | GO:0031514 | motile cilium                  | 0.01761233 | SPAG16, IFT74, ARL13B, WDR19, PKD2                          |
| <b>GO Term<br/>Biological<br/>Process</b> | GO:0006270 | DNA replication initiation     | 0.01848136 | ORC6, PRIM1, MCM3, MCM10                                    |
| <b>GO Term<br/>Biological<br/>Process</b> | GO:0051726 | regulation of cell cycle       | 0.01926393 | LIN54, CENPF, CDK19, CCNB1, CCNF,<br>MASTL, LIN52           |
| <b>GO Term<br/>Biological<br/>Process</b> | GO:0042384 | cilium assembly                | 0.02003498 | SPAG16, IFT74, ARL13B, TMEM138,<br>KIAA0586, WDR19, CEP83   |

|                                           |            |                                                   |            |                                                                                        |
|-------------------------------------------|------------|---------------------------------------------------|------------|----------------------------------------------------------------------------------------|
| <b>GO Term<br/>Biological<br/>Process</b> | GO:0007017 | microtubule-based process                         | 0.02018297 | TUBA1B, TUBE1, DYNLL1, DNAL4                                                           |
| <b>GO Term<br/>Molecular<br/>Function</b> | GO:0005525 | GTP binding                                       | 0.02119777 | RAB21, RAP2A, TUBA1B, RAB31, MRAS, RRAGC, ARL13B, RABL2A, RABL2B, TUBE1, TUBG1, RAB22A |
| <b>GO Term<br/>Biological<br/>Process</b> | GO:0000722 | telomere maintenance via recombination            | 0.021968   | FEN1, RAD51C, PRIM1, RPA3                                                              |
| <b>GO Term<br/>Cellular<br/>Component</b> | GO:0016592 | mediator complex                                  | 0.02389909 | MED20, MED29, MED18, MED17                                                             |
| <b>GO Term<br/>Biological<br/>Process</b> | GO:0006271 | DNA strand elongation involved in DNA replication | 0.03165054 | GIN51, GINS3, PRIM1                                                                    |
| <b>GO Term<br/>Cellular<br/>Component</b> | GO:0035098 | ESC/E(Z) complex                                  | 0.03170424 | PHF1, TRIM37, RBBP7                                                                    |
| <b>GO Term<br/>Biological<br/>Process</b> | GO:0034080 | CENP-A containing nucleosome assembly             | 0.03214305 | MIS18A, CENPH, RBBP7, CENPA                                                            |
| <b>GO Term<br/>Cellular<br/>Component</b> | GO:0031513 | nonmotile primary cilium                          | 0.04006704 | WDR19, TUBG1, PKD2                                                                     |
| <b>GO Term<br/>Cellular<br/>Component</b> | GO:0035371 | microtubule plus-end                              | 0.04006704 | KIF18B, MAPRE1, KNSTRN                                                                 |



|                                   |            |                                      |            |                                      |
|-----------------------------------|------------|--------------------------------------|------------|--------------------------------------|
| <b>KEGG Pathway</b>               | hsa03440   | Homologous recombination             | 0.04129865 | RAD51C, EME1, RPA3                   |
| <b>GO Term Cellular Component</b> | GO:0072372 | primary cilium                       | 0.04315604 | IFT74, ARL13B, TTC21B, WDR19, DYNLL1 |
| <b>GO Term Biological Process</b> | GO:0000910 | cytokinesis                          | 0.04437272 | ESPL1, PRC1, BIRC5, KIF20A           |
| <b>GO Term Biological Process</b> | GO:0071539 | protein localization to centrosome   | 0.04445261 | STIL, CEP83, MCPH1                   |
| <b>GO Term Biological Process</b> | GO:0007020 | microtubule nucleation               | 0.04445261 | CENPJ, TUBG1, NDEL1                  |
| <b>GO Term Cellular Component</b> | GO:0032154 | cleavage furrow                      | 0.04448127 | RAB21, PLEKHG6, MASTL, MYH10         |
| <b>KEGG Pathway</b>               | hsa04110   | Cell cycle                           | 0.04478949 | CCNB1, ORC6, ESPL1, MCM3, ANAPC1     |
| <b>GO Term Biological Process</b> | GO:0007368 | determination of left/right symmetry | 0.04705919 | ACVR1, IFT74, STIL, PKD2             |
| <b>GO Term Biological Process</b> | GO:0001947 | heart looping                        | 0.0498241  | STIL, ARL13B, PKD2, TBX2             |
| <b>GO Term Cellular Component</b> | GO:0005881 | cytoplasmic microtubule              | 0.04994405 | TUBA1B, BIRC5, TUBG1, MAPRE1         |

|   |                                  |            |             |          |                                                                                                                                                                                                                                                                                                                                                                                                                                                                                                                                                                                                                                                                 |
|---|----------------------------------|------------|-------------|----------|-----------------------------------------------------------------------------------------------------------------------------------------------------------------------------------------------------------------------------------------------------------------------------------------------------------------------------------------------------------------------------------------------------------------------------------------------------------------------------------------------------------------------------------------------------------------------------------------------------------------------------------------------------------------|
| 2 | GO Term<br>Cellular<br>Component | GO:0005654 | nucleoplasm | 6.69E-15 | RB1, KDM5B, CDKN1B, CCNH, FMR1, FHL2, UBE2D1, IDE, BRCA2, SYNE2, CCAR2, RPTOR, STK11, MYC, CHEK2, SUFU, SUMO2, RCC1, SOX9, TOPBP1, SKP2, NCOA2, SREBF1, MED1, PBRM1, TBP, CHUK, METTL3, H2AFX, PRKCD, DNMT3A, VPS37A, PAX6, DUSP6, SENP1, HCFC1, RBL2, PSMA3, PLCB3, RBL1, PSMA4, CREB1, TFDP1, MORF4L2, RARA, WAC, MAPKAPK5, DNA2, UTRN, KDM7A, BIRC3, PSMD11, PSMD14, CUL3, SRSF1, CUL1, GPS2, COPS7A, TXN, RNF2, TGOLN2, E2F2, E2F3, E2F4, DMAP1, E2F5, BPTF, MCL1, MAPK3, MAP2K6, ESRRB, SMAD2, KDM4A, HSPA8, TCF7L1, CDKN2A, SETD1B, INTS2, NR2F1, NR1H4, NR1H3, HIPK2, CDK8, MLXIPL, GOLPH3, CDK6, CDKN2AIPNL, SP4, APEX1, ID1, CDK12, FERMT2, TJP2, TAF1 |
|---|----------------------------------|------------|-------------|----------|-----------------------------------------------------------------------------------------------------------------------------------------------------------------------------------------------------------------------------------------------------------------------------------------------------------------------------------------------------------------------------------------------------------------------------------------------------------------------------------------------------------------------------------------------------------------------------------------------------------------------------------------------------------------|

|  |                                  |            |                 |          |                                                                                                                                                                                                                                                                                                                                                                                                                                                                                                                                                                                                                                                                                                                                                                                                                                                                                                                                                                                                                                                                                                 |
|--|----------------------------------|------------|-----------------|----------|-------------------------------------------------------------------------------------------------------------------------------------------------------------------------------------------------------------------------------------------------------------------------------------------------------------------------------------------------------------------------------------------------------------------------------------------------------------------------------------------------------------------------------------------------------------------------------------------------------------------------------------------------------------------------------------------------------------------------------------------------------------------------------------------------------------------------------------------------------------------------------------------------------------------------------------------------------------------------------------------------------------------------------------------------------------------------------------------------|
|  | GO Term<br>Molecular<br>Function | GO:0005515 | protein binding | 6.41E-14 | RB1, EPO, IRS1, CCNH, FMR1, GFI1,<br>SERPINE1, UBE2D1, LCLAT1, CCAR2,<br>EEF1B2, STK11, MYC, CHEK2, RCC1,<br>SOX9, PIM2, SKP2, MAP3K7, PDK1,<br>MED1, PRKCI, PRKCD, COG2, DKK1,<br>HCFC1, RNF126, LOX, EWSR1,<br>PRKAR1A, MORF4L2, MAPKAPK5,<br>UBE2V1, DNA2, PFN1, UTRN, MACF1,<br>PSMD11, TXNDC9, PSMD14, CUL3,<br>CUL1, HTRA2, VPS26A, COPS7A,<br>PSEN1, TXN, NDRG1, GLIS2, TGOLN2,<br>SDCBP, SNX1, FADD, DMAP1, PROM1,<br>CDR2, MCL1, BPTF, MAP2K6, ESRRA,<br>SMAD2, HSPA8, PRNP, HOMER1,<br>SETD1B, INSR, INTS2, NR2F1,<br>EIF2AK3, PARVA, UBE2A, IGF2R,<br>CDK8, DLG1, CDK6, AGO4, SP4, ID1,<br>ALB, UBA3, SDC1, CDK12, GNB5,<br>ALDH18A1, MYD88, FERMT2, FGFR1,<br>KDM5B, CSRNP2, CDKN1B, MOCS3,<br>TRADD, PDE3B, FHL2, IDE, PIK3CB,<br>BRCA2, GPHN, HK2, SYNE2, CASP9,<br>RPTOR, SUFU, SUMO2, TOPBP1, LBR,<br>NKX3-1, BRD3, NCOA2, SREBF1,<br>PBRM1, TBP, CHUK, KSR1, H2AFX,<br>DNMT3A, RRAS2, VPS37A, PAX6,<br>SENP1, RBL2, BACE1, WRAP73,<br>PSMA3, RBL1, PSMA4, CREB1, TFDP1,<br>CTTN, TRAF6, PEX5, RARA, WAC,<br>PIK3C3, BIRC3, ARF6, FH, STX16,<br>SRSF1, GPS2, MAT2B, HMGCR, AFP, |
|--|----------------------------------|------------|-----------------|----------|-------------------------------------------------------------------------------------------------------------------------------------------------------------------------------------------------------------------------------------------------------------------------------------------------------------------------------------------------------------------------------------------------------------------------------------------------------------------------------------------------------------------------------------------------------------------------------------------------------------------------------------------------------------------------------------------------------------------------------------------------------------------------------------------------------------------------------------------------------------------------------------------------------------------------------------------------------------------------------------------------------------------------------------------------------------------------------------------------|

|  |  |  |  |  |                                                                                                                                                                                                                   |
|--|--|--|--|--|-------------------------------------------------------------------------------------------------------------------------------------------------------------------------------------------------------------------|
|  |  |  |  |  | RNF2, CLN3, MAT2A, IGF2BP1, E2F2, E2F3, E2F4, E2F5, EIF4E, MAPK3, UBL4A, KDM4A, CDKN2A, SORT1, USP22, HIP1R, NR1H4, RANBP9, NR1H3, UBE2G2, SORL1, HIPK2, GOLPH3, APEX1, VPS41, AGGF1, FAS, CD9, BCAR1, TJP2, TAF1 |
|--|--|--|--|--|-------------------------------------------------------------------------------------------------------------------------------------------------------------------------------------------------------------------|

|  |                                           |            |         |          |                                                                                                                                                                                                                                                                                                                                                                                                                                                                                                                                                                                                                                                                                                                                                                                                                                      |
|--|-------------------------------------------|------------|---------|----------|--------------------------------------------------------------------------------------------------------------------------------------------------------------------------------------------------------------------------------------------------------------------------------------------------------------------------------------------------------------------------------------------------------------------------------------------------------------------------------------------------------------------------------------------------------------------------------------------------------------------------------------------------------------------------------------------------------------------------------------------------------------------------------------------------------------------------------------|
|  | <b>GO Term<br/>Cellular<br/>Component</b> | GO:0005634 | nucleus | 2.79E-10 | RB1, IRS1, CCNH, FMR1, GFI1, CCAR2, EEF1B2, STK11, MYC, RCC1, SOX9, SKP2, MAP3K7, MED1, PRKCI, METTL3, PRKCD, ASRGL1, HCFC1, RNF126, LOX, EWSR1, MORF4L2, SUCLG2, MAPKAPK5, UBE2V1, DNA2, PFN1, PSMD11, TXNDC9, PSMD14, CUL3, HTRA2, PSEN1, TXN, NDRG1, GLIS2, SDCBP, DMAP1, MCL1, BPTF, ESRRA, SMAD2, HSPA8, PRNP, SETD1B, NR2F1, GGH, PARVA, CDK8, MLXIPL, DLG1, CDK6, AGO4, SP4, ID1, ALB, UBA3, CDK12, GNB5, MYD88, FERMT2, FGFR1, KDM5B, CSRNP2, CDKN1B, TRADD, FHL2, IDE, PIK3CB, BRCA2, SYNE2, CASP9, SUFU, SUMO2, TOPBP1, NKX3-1, BRD3, NCOA2, SREBF1, TBP, H2AFX, DNMT3A, SIRT5, PAX6, SENP1, RBL2, PSMA3, RBL1, PSMA4, CREB1, TFDP1, TRAF6, RARA, WAC, KDM7A, BIRC3, SRSF1, MAT2B, RNF2, CLN3, IGF2BP1, E2F3, E2F4, E2F5, MAPK3, UBL4A, KDM4A, TCF7L1, CDKN2A, NR1H4, RANBP9, NR1H3, HIPK2, UFM1, PITHD1, APEX1, FAS, TAF1 |
|--|-------------------------------------------|------------|---------|----------|--------------------------------------------------------------------------------------------------------------------------------------------------------------------------------------------------------------------------------------------------------------------------------------------------------------------------------------------------------------------------------------------------------------------------------------------------------------------------------------------------------------------------------------------------------------------------------------------------------------------------------------------------------------------------------------------------------------------------------------------------------------------------------------------------------------------------------------|

|  |                                  |            |                                                                         |          |                                                                                                                                                                                                                                                    |
|--|----------------------------------|------------|-------------------------------------------------------------------------|----------|----------------------------------------------------------------------------------------------------------------------------------------------------------------------------------------------------------------------------------------------------|
|  | GO Term<br>Biological<br>Process | GO:0000122 | negative regulation of transcription<br>from RNA polymerase II promoter | 3.72E-10 | RB1, EPO, CUL3, GFI1, FHL2, UBE2D1,<br>GPS2, PSEN1, TXN, RNF2, GLIS2, MYC,<br>SUFU, DMAP1, BPTF, ESRRA, SMAD2,<br>SREBF1, NCOA2, MED1, DNMT3A,<br>NR2F1, NR1H4, NR1H3, PAX6, DKK1,<br>HIPK2, HCFC1, MLXIPL, DLG1, RBL1,<br>TRAF6, ID1, RARA, FGFR1 |
|  | GO Term<br>Biological<br>Process | GO:0045893 | positive regulation of transcription,<br>DNA-templated                  | 7.67E-10 | RB1, EPO, FHL2, PSEN1, BRCA2,<br>GLIS2, CHEK2, MYC, E2F3, SOX9,<br>PIM2, BPTF, NKX3-1, MAPK3, SMAD2,<br>MED1, TBP, CDKN2A, USP22, INSR,<br>NR1H3, PAX6, HIPK2, MLXIPL, CREB1,<br>RARA, WAC, UBE2V1, KDM7A                                          |

|  |                                  |            |         |          |                                                                                                                                                                                                                                                                                                                                                                                                                                                                                                                                                                                                                                                                                                       |
|--|----------------------------------|------------|---------|----------|-------------------------------------------------------------------------------------------------------------------------------------------------------------------------------------------------------------------------------------------------------------------------------------------------------------------------------------------------------------------------------------------------------------------------------------------------------------------------------------------------------------------------------------------------------------------------------------------------------------------------------------------------------------------------------------------------------|
|  | GO Term<br>Cellular<br>Component | GO:0005829 | cytosol | 9.29E-10 | CDKN1B, MOCS3, IRS1, TRADD,<br>PDE3B, UBE2D1, PIK3CB, IDE, HK2,<br>EEF1B2, RPTOR, CASP9, STK11, MYC,<br>SUFU, SKP2, MAP3K7, SREBF1, PRKCI,<br>KSR1, CHUK, PRKCD, COG2, SIRT5,<br>ASRGL1, DUSP6, PSMA3, PLCB3,<br>RNF126, PSMA4, PRKAR1A, TRAF6,<br>PEX5, CAT, PIK3C3, MAPKAPK5,<br>UBE2V1, PFN1, BIRC3, FH, PSMD11,<br>PSMD14, STX16, CUL3, CUL1, HTRA2,<br>VPS26A, MAT2B, TXN, NDRG1,<br>TGOLN2, SDCBP, SNX1, MAT2A,<br>IGF2BP1, FADD, PCK1, EIF4E, MCL1,<br>MAPK3, MAP2K6, UBL4A, SMAD2,<br>HSPA8, CHKA, SORT1, CDKN2A,<br>IDH1, GGH, MTHFR, RANBP9,<br>PARVA, UBE2A, UBE2G2, DDHD1,<br>MLXIPL, DLG1, GOLPH3, CDK6,<br>PSAT1, AGO4, VPS41, UBA3, FAS,<br>GNB5, MYD88, BCAR1, FERMT2, TJP2,<br>FGFR1 |
|--|----------------------------------|------------|---------|----------|-------------------------------------------------------------------------------------------------------------------------------------------------------------------------------------------------------------------------------------------------------------------------------------------------------------------------------------------------------------------------------------------------------------------------------------------------------------------------------------------------------------------------------------------------------------------------------------------------------------------------------------------------------------------------------------------------------|

|  |                                           |            |                                                                      |          |                                                                                                                                                                                                                                                           |
|--|-------------------------------------------|------------|----------------------------------------------------------------------|----------|-----------------------------------------------------------------------------------------------------------------------------------------------------------------------------------------------------------------------------------------------------------|
|  | <b>GO Term<br/>Molecular<br/>Function</b> | GO:0008134 | transcription factor binding                                         | 7.58E-09 | RB1, SMAD2, NCOA2, MED1, TBP, CDKN2A, FHL2, PAX6, MLXIPL, RBL1, TFDP1, MYC, SUFU, ID1, RARA, E2F2, E2F4, E2F5, BPTF, TAF1, NKX3-1                                                                                                                         |
|  | <b>GO Term<br/>Biological<br/>Process</b> | GO:0045944 | positive regulation of transcription from RNA polymerase II promoter | 1.68E-08 | RB1, CSRN2, CCNH, SERPINE1, GLIS2, MYC, SUMO2, FADD, SOX9, E2F4, E2F5, NKX3-1, MAPK3, ESRRA, SMAD2, SREBF1, NCOA2, MED1, CHUK, CDKN2A, NR2F1, NR1H4, NR1H3, PAX6, HIPK2, SENP1, HCFC1, CDK8, MLXIPL, CREB1, RBL1, TFDP1, TRAF6, MORF4L2, RARA, PFN1, TAF1 |



|  |                                           |            |                                          |          |                                                                                                                                                             |
|--|-------------------------------------------|------------|------------------------------------------|----------|-------------------------------------------------------------------------------------------------------------------------------------------------------------|
|  | <b>GO Term<br/>Biological<br/>Process</b> | GO:0043066 | negative regulation of apoptotic process | 1.07E-07 | PRNP, MED1, PRKCI, CDKN1B, FHL2, NR1H4, PSEN1, CLN3, GOLPH3, DAD1, AGO4, MYC, TRAF6, ID1, CAT, ALB, RARA, FAS, PIM2, SOX9, MYD88, MCL1, BIRC3               |
|  | <b>GO Term<br/>Cellular<br/>Component</b> | GO:0043234 | protein complex                          | 1.42E-07 | SREBF1, PRKCI, CDKN1B, KSR1, CDKN2A, UBE2D1, PSEN1, BRCA2, CDK8, SNX1, PLCB3, PRKAR1A, MYC, TRAF6, PEX5, ALB, SDC1, SOX9, UBE2V1, UTRN, MYD88, BIRC3, MAPK3 |
|  | <b>GO Term<br/>Biological<br/>Process</b> | GO:0050852 | T cell receptor signaling pathway        | 1.55E-07 | PSMD11, PSMD14, CHUK, CUL1, UBE2D1, PIK3CB, PSEN1, STK11, PSMA3, PSMA4, TRAF6, UBE2V1, MAP3K7, BCAR1                                                        |

|  |                         |          |            |          |                                                                                                                    |
|--|-------------------------|----------|------------|----------|--------------------------------------------------------------------------------------------------------------------|
|  | <b>KEGG<br/>Pathway</b> | hsa04110 | Cell cycle | 3.29E-07 | RB1, SMAD2, CDKN1B, CDKN2A,<br>CCNH, CUL1, RBL2, RBL1, TFDP1,<br>CDK6, CHEK2, MYC, E2F2, E2F3, E2F4,<br>SKP2, E2F5 |
|--|-------------------------|----------|------------|----------|--------------------------------------------------------------------------------------------------------------------|

|  |                                  |            |           |          |                                                                                                                                                                                                                                                                                                                                                                                                                                                                                                                                                                                                                                                                                                                                                             |
|--|----------------------------------|------------|-----------|----------|-------------------------------------------------------------------------------------------------------------------------------------------------------------------------------------------------------------------------------------------------------------------------------------------------------------------------------------------------------------------------------------------------------------------------------------------------------------------------------------------------------------------------------------------------------------------------------------------------------------------------------------------------------------------------------------------------------------------------------------------------------------|
|  | GO Term<br>Cellular<br>Component | GO:0005737 | cytoplasm | 1.06E-06 | IRS1, FMR1, UBE2D1, CCAR2, EEF1B2, STK11, RCC1, PIM2, SKP2, MAP3K7, PRKCI, PRKCD, ASRGL1, HCFC1, RNF123, RNF126, EWSR1, PRKAR1A, MAPKAPK5, UBE2V1, PFN1, UTRN, MACF1, TXNDC9, COPS7A, TXN, NDRG1, UBE2J1, GLIS2, SDCBP, SNX1, FADD, DMAP1, PCK1, CDR2, MCL1, BPTF, MAP2K6, SMAD2, PRNP, SETD1B, IDH1, EIF2AK3, PARVA, UBE2A, IGF2R, MLXIPL, DLG1, CDK6, AGO4, SP4, SDC1, ALDH18A1, NES, MYD88, FERMT2, KDM5B, CDKN1B, TRADD, IDE, BRCA2, GPHN, SYNE2, RPTOR, SUFU, TOPBP1, NCOA2, SREBF1, TBP, CHUK, DNMT3A, VPS37A, PAX6, DUSP6, SENP1, RBL2, PSMA3, PSMA4, CTTN, TRAF6, PEX5, RARA, BIRC3, FH, STX16, SRSF1, AFP, CLN3, IGF2BP1, E2F3, E2F5, EIF4E, UBL4A, KDM4A, CDKN2A, HIP1R, RANBP9, DDHD1, HIPK2, ETAA1, UFM1, PSAT1, APEX1, AGGF1, FAS, BCAR1, TJP2 |
|--|----------------------------------|------------|-----------|----------|-------------------------------------------------------------------------------------------------------------------------------------------------------------------------------------------------------------------------------------------------------------------------------------------------------------------------------------------------------------------------------------------------------------------------------------------------------------------------------------------------------------------------------------------------------------------------------------------------------------------------------------------------------------------------------------------------------------------------------------------------------------|

|                                           |            |                                                      |          |                                                                                                                                                                         |
|-------------------------------------------|------------|------------------------------------------------------|----------|-------------------------------------------------------------------------------------------------------------------------------------------------------------------------|
| <b>KEGG<br/>Pathway</b>                   | hsa05200   | Pathways in cancer                                   | 2.25E-06 | RB1, FH, CDKN1B, PIK3CB, BRCA2, CASP9, MYC, SUFU, E2F2, E2F3, FADD, SKP2, NKX3-1, MAPK3, SMAD2, TCF7L1, CHUK, CDKN2A, PLCB3, CDK6, TRAF6, RARA, FAS, GNB5, BIRC3, FGFR1 |
| <b>GO Term<br/>Biological<br/>Process</b> | GO:0002223 | stimulatory C-type lectin receptor signaling pathway | 4.25E-06 | PSMA3, PSMA4, PSMD11, PSMD14, CHUK, TRAF6, PRKCD, CUL1, UBE2D1, UBE2V1, MAP3K7                                                                                          |
| <b>GO Term<br/>Biological<br/>Process</b> | GO:0038095 | Fc-epsilon receptor signaling pathway                | 5.30E-06 | PSMA3, PSMA4, PSMD11, PSMD14, CHUK, TRAF6, CUL1, UBE2D1, UBE2V1, PIK3CB, MAP3K7, MAPK3                                                                                  |
| <b>GO Term<br/>Biological<br/>Process</b> | GO:0051726 | regulation of cell cycle                             | 5.30E-06 | RB1, RBL2, CDK8, HSPA8, MED1, RBL1, UBA3, E2F2, CDK12, E2F5, SKP2, HIPK2                                                                                                |

|                                   |            |                                       |          |                                                                                                                            |
|-----------------------------------|------------|---------------------------------------|----------|----------------------------------------------------------------------------------------------------------------------------|
| <b>KEGG Pathway</b>               | hsa05222   | Small cell lung cancer                | 6.03E-06 | RB1, CASP9, CDKN1B, CDK6, CHUK, MYC, TRAF6, E2F2, E2F3, PIK3CB, SKP2, BIRC3                                                |
| <b>GO Term Biological Process</b> | GO:0032147 | activation of protein kinase activity | 6.24E-06 | RPTOR, STK11, DLG1, EPO, TRAF6, INSR, PRKCD, NKX3-1                                                                        |
| <b>GO Term Biological Process</b> | GO:0000082 | G1/S transition of mitotic cell cycle | 6.99E-06 | RB1, CDKN1B, CDK6, CDKN2A, CCNH, CUL3, CUL1, RCC1, PIM2, SKP2, EIF4E                                                       |
| <b>GO Term Molecular Function</b> | GO:0019899 | enzyme binding                        | 1.00E-05 | HSPA8, TBP, SORT1, USP22, H2AFX, PRKCD, EIF2AK3, RANBP9, MAT2B, CCAR2, IGF2R, BACE1, GOLPH3, CREB1, PEX5, CAT, RARA, EIF4E |
| <b>KEGG Pathway</b>               | hsa05212   | Pancreatic cancer                     | 1.08E-05 | RB1, SMAD2, CASP9, CDK6, CHUK, CDKN2A, E2F2, E2F3, PIK3CB, BRCA2, MAPK3                                                    |

|  |                                           |            |                            |          |                                                                                                                                                                                                          |
|--|-------------------------------------------|------------|----------------------------|----------|----------------------------------------------------------------------------------------------------------------------------------------------------------------------------------------------------------|
|  | <b>GO Term<br/>Biological<br/>Process</b> | GO:0000209 | protein polyubiquitination | 1.27E-05 | PSMD11, PSMD14, CDKN2A, CUL3,<br>CUL1, UBE2D1, UBE2A, RNF126,<br>PSMA3, PSMA4, TRAF6, UBE2V1,<br>SKP2, TAF1                                                                                              |
|  | <b>GO Term<br/>Biological<br/>Process</b> | GO:0016032 | viral process              | 1.78E-05 | RB1, HSPA8, KDM4A, TBP, NUP210,<br>GFI1, H2AFX, CUL1, DLG1, PSMA3,<br>CREB1, RBL1, PSMA4, RCC1, EIF4E,<br>TAF1, MAPK3                                                                                    |
|  | <b>KEGG<br/>Pathway</b>                   | hsa05215   | Prostate cancer            | 1.79E-05 | RB1, CASP9, TCF7L1, CDKN1B, CREB1,<br>CHUK, E2F2, E2F3, PIK3CB, FGFR1,<br>NKX3-1, MAPK3                                                                                                                  |
|  | <b>GO Term<br/>Molecular<br/>Function</b> | GO:0042802 | identical protein binding  | 1.81E-05 | RB1, TRADD, FMR1, FHL2, SDCBP,<br>SNX1, MAT2A, CHEK2, TOPBP1,<br>FADD, SKP2, PRNP, DNMT3A,<br>EIF2AK3, UBE2G2, IGF2R, HCFC1,<br>CREB1, EWSR1, TRAF6, VPS41, ALB,<br>UBA3, FAS, ALDH18A1, MYD88,<br>FGFR1 |

|                                           |            |                                                                                        |          |                                                                                                    |
|-------------------------------------------|------------|----------------------------------------------------------------------------------------|----------|----------------------------------------------------------------------------------------------------|
| <b>GO Term<br/>Biological<br/>Process</b> | GO:0006367 | transcription initiation from RNA<br>polymerase II promoter                            | 1.91E-05 | ESRRA, CDK8, MED1, TBP, CCNH,<br>NR2F1, NR1H4, RARA, E2F2, NR1H3,<br>E2F3, TAF1                    |
| <b>KEGG<br/>Pathway</b>                   | hsa05161   | Hepatitis B                                                                            | 4.04E-05 | RB1, CDKN1B, CHUK, PIK3CB, CASP9,<br>CREB1, CDK6, MYC, FAS, E2F2, E2F3,<br>FADD, MYD88, MAPK3      |
| <b>GO Term<br/>Biological<br/>Process</b> | GO:0006974 | cellular response to DNA damage<br>stimulus                                            | 4.11E-05 | FMR1, H2AFX, PSEN1, CCAR2, CASP9,<br>STK11, PITHD1, CHEK2, MYC, TRAF6,<br>WAC, TOPBP1, TAF1, MAPK3 |
| <b>GO Term<br/>Biological<br/>Process</b> | GO:0006919 | activation of cysteine-type<br>endopeptidase activity involved in<br>apoptotic process | 4.75E-05 | CDKN1B, CDKN2A, TRADD, HIP1R,<br>EIF2AK3, FAS, FADD, SENP1, NKX3-1                                 |
| <b>GO Term<br/>Cellular<br/>Component</b> | GO:0005667 | transcription factor complex                                                           | 5.38E-05 | SMAD2, RBL2, MLXIPL, TCF7L1,<br>TFDP1, RBL1, APEX1, E2F2, E2F3, E2F4,<br>E2F5, TAF1                |

|                                           |            |                                              |          |                                                                                                                                     |
|-------------------------------------------|------------|----------------------------------------------|----------|-------------------------------------------------------------------------------------------------------------------------------------|
| <b>GO Term<br/>Molecular<br/>Function</b> | GO:0004672 | protein kinase activity                      | 7.14E-05 | PRKCI, KSR1, CHUK, PRKCD,<br>EIF2AK3, HIPK2, CDK8, STK11,<br>CHEK2, MAPKAPK5, PIK3C3, PIM2,<br>SOX9, CDK12, MAP3K7, MAP2K6,<br>PDK1 |
| <b>GO Term<br/>Biological<br/>Process</b> | GO:0007050 | cell cycle arrest                            | 8.45E-05 | RPTOR, RB1, PRNP, STK11, CDKN1B,<br>CDK6, CDKN2A, MYC, CUL3, CUL1,<br>MAP2K6                                                        |
| <b>GO Term<br/>Biological<br/>Process</b> | GO:0008284 | positive regulation of cell<br>proliferation | 9.65E-05 | CDKN1B, EPO, IRS1, CUL3, INSR,<br>UBE2A, HIPK2, MLXIPL, SDCBP,<br>DLG1, MYC, RARA, E2F3, SOX9,<br>FGFR1, TAF1, NKX3-1               |
| <b>GO Term<br/>Molecular<br/>Function</b> | GO:0003713 | transcription coactivator activity           | 1.06E-04 | RB1, NCOA2, MED1, USP22, FHL2,<br>NR2F1, NR1H4, NR1H3, HCFC1,<br>TFDP1, APEX1, SP4, RARA, TAF1                                      |
| <b>GO Term<br/>Biological<br/>Process</b> | GO:0038061 | NIK/NF-kappaB signaling                      | 1.18E-04 | PSMA3, PSMA4, PSMD11, PSMD14,<br>CHUK, CUL1, UBA3, BIRC3                                                                            |



|  |                                           |            |                        |          |                                                                                                                               |
|--|-------------------------------------------|------------|------------------------|----------|-------------------------------------------------------------------------------------------------------------------------------|
|  | <b>GO Term<br/>Cellular<br/>Component</b> | GO:0005925 | focal adhesion         | 1.25E-04 | HSPA8, STX16, FHL2, RRAS2, PARVA,<br>SYNE2, IGF2R, SENP1, SDCBP, CTTN,<br>CAT, CD9, SDC1, PFN1, FERMT2,<br>BCAR1, MAPK3, ARF6 |
|  | <b>GO Term<br/>Biological<br/>Process</b> | GO:0000165 | MAPK cascade           | 1.50E-04 | PSMD11, PSMD14, KSR1, IRS1, CUL3,<br>DUSP6, PSMA3, PSMA4, MYC,<br>MAPKAPK5, MAP2K6, FGFR1, MAPK3                              |
|  | <b>GO Term<br/>Cellular<br/>Component</b> | GO:0000790 | nuclear chromatin      | 1.50E-04 | SMAD2, CREB1, TBP, H2AFX, RARA,<br>RCC1, NR1H3, PAX6, E2F4, UBE2A,<br>CCAR2, TAF1                                             |
|  | <b>GO Term<br/>Biological<br/>Process</b> | GO:0032355 | response to estradiol  | 1.59E-04 | ESRRA, CASP9, CDKN1B, MYC,<br>DNMT3A, CAT, RARA, TFPI                                                                         |
|  | <b>KEGG<br/>Pathway</b>                   | hsa04068   | FoxO signaling pathway | 1.62E-04 | SMAD2, CDKN1B, HOMER1, CHUK,<br>IRS1, INSR, PIK3CB, RBL2, STK11, CAT,<br>SKP2, PCK1, MAPK3                                    |

|  |                                           |            |                                  |          |                                                                                                                                |
|--|-------------------------------------------|------------|----------------------------------|----------|--------------------------------------------------------------------------------------------------------------------------------|
|  | <b>GO Term<br/>Molecular<br/>Function</b> | GO:0031625 | ubiquitin protein ligase binding | 1.67E-04 | RB1, SMAD2, HSPA8, KDM4A, CUL3, CUL1, PAX6, UBE2A, UBE2G2, UBE2J1, PRKAR1A, CHEK2, TRAF6, SUMO2, UBE2V1                        |
|  | <b>GO Term<br/>Biological<br/>Process</b> | GO:0006468 | protein phosphorylation          | 1.73E-04 | SMAD2, PRKCI, CHUK, CCNH, PRKCD, EIF2AK3, HIPK2, CDK8, STK11, CREB1, CDK6, CHEK2, RARA, PIK3C3, PIM2, PDK1, FGFR1, TAF1, MAPK3 |
|  | <b>GO Term<br/>Biological<br/>Process</b> | GO:0007568 | aging                            | 1.85E-04 | CASP9, SREBF1, CREB1, EPO, APEX1, DNMT3A, CAT, HTRA2, HMGCR, PCK1                                                              |
|  | <b>KEGG<br/>Pathway</b>                   | hsa05220   | Chronic myeloid leukemia         | 1.95E-04 | RB1, CDKN1B, CDK6, CHUK, CDKN2A, MYC, E2F2, E2F3, PIK3CB, MAPK3                                                                |
|  | <b>GO Term<br/>Biological<br/>Process</b> | GO:0045471 | response to ethanol              | 2.12E-04 | EEF1B2, PSMD14, MYC, CAT, RARA, GGH, HMGCR, DMAP1                                                                              |

|  |                                           |            |                              |          |                                                                                                                                    |
|--|-------------------------------------------|------------|------------------------------|----------|------------------------------------------------------------------------------------------------------------------------------------|
|  | <b>GO Term<br/>Biological<br/>Process</b> | GO:0042493 | response to drug             | 2.16E-04 | SREBF1, CDKN1B, CHUK, DNMT3A,<br>GGH, MTHFR, DUSP6, CREB1, LOX,<br>DAD1, MYC, APEX1, CAT, MAP2K6                                   |
|  | <b>KEGG<br/>Pathway</b>                   | hsa05169   | Epstein-Barr virus infection | 2.26E-04 | RB1, CDKN1B, PSMD11, PSMD14,<br>CHUK, MYC, TRAF6, TRADD, PIK3CB,<br>SKP2, MAP3K7, MAP2K6                                           |
|  | <b>KEGG<br/>Pathway</b>                   | hsa04151   | PI3K-Akt signaling pathway   | 2.27E-04 | CDKN1B, CHUK, EPO, IRS1, INSR,<br>PIK3CB, CASP9, RBL2, RPTOR, STK11,<br>CREB1, CDK6, MYC, GNB5, PCK1,<br>EIF4E, MCL1, FGFR1, MAPK3 |
|  | <b>GO Term<br/>Biological<br/>Process</b> | GO:0000187 | activation of MAPK activity  | 2.32E-04 | TRAF6, INSR, MAPKAPK5, PIK3CB,<br>MAP3K7, DUSP6, MAP2K6, MAPK3                                                                     |

|  |                                           |            |                                                                                                                  |          |                                                                                                                                            |
|--|-------------------------------------------|------------|------------------------------------------------------------------------------------------------------------------|----------|--------------------------------------------------------------------------------------------------------------------------------------------|
|  | <b>GO Term<br/>Biological<br/>Process</b> | GO:0045892 | negative regulation of<br>transcription, DNA-templated                                                           | 2.46E-04 | RB1, SMAD2, KDM5B, HSPA8,<br>KDM4A, CDKN1B, CDKN2A, GFI1,<br>FHL2, CCAR2, GLIS2, MLXIPL, TRAF6,<br>ID1, UBA3, RARA, SOX9, DMAP1,<br>NKX3-1 |
|  | <b>GO Term<br/>Biological<br/>Process</b> | GO:0006511 | ubiquitin-dependent protein<br>catabolic process                                                                 | 2.88E-04 | PSMA3, PSMA4, PSMD11, PSMD14,<br>CUL3, USP22, CUL1, UBE2D1, UBE2A,<br>UBE2G2, SKP2                                                         |
|  | <b>GO Term<br/>Biological<br/>Process</b> | GO:2000059 | negative regulation of protein<br>ubiquitination involved in<br>ubiquitin-dependent protein<br>catabolic process | 3.01E-04 | CDKN2A, SUFU, PSEN1, TAF1                                                                                                                  |

|  |                                           |            |                                              |          |                                                                                                                                                                                                                                                                                                                                                      |
|--|-------------------------------------------|------------|----------------------------------------------|----------|------------------------------------------------------------------------------------------------------------------------------------------------------------------------------------------------------------------------------------------------------------------------------------------------------------------------------------------------------|
|  | <b>GO Term<br/>Biological<br/>Process</b> | GO:0006351 | transcription, DNA-templated                 | 3.85E-04 | RB1, KDM5B, CCNH, GFI1, FHL2, TXN,<br>CCAR2, RNF2, CHEK2, E2F3, E2F4,<br>DMAP1, E2F5, MAP3K7, BPTF, NKX3-1,<br>MAPK3, MAP2K6, BRD3, ESRRA,<br>SMAD2, NCOA2, KDM4A, HSPA8,<br>PBRM1, TCF7L1, CDKN2A, SETD1B,<br>USP22, NR2F1, NR1H4, NR1H3, PAX6,<br>HIPK2, RBL2, MLXIPL, RBL1, TFDP1,<br>EWSR1, APEX1, SP4, MORF4L2, ID1,<br>RARA, WAC, KDM7A, FGFR1 |
|  | <b>KEGG<br/>Pathway</b>                   | hsa05142   | Chagas disease (American<br>trypanosomiasis) | 4.58E-04 | SMAD2, PLCB3, CHUK, TRAF6,<br>SERPINE1, FAS, FADD, PIK3CB,<br>MYD88, MAPK3                                                                                                                                                                                                                                                                           |

|                                   |            |                                                                                                               |          |                                                                            |
|-----------------------------------|------------|---------------------------------------------------------------------------------------------------------------|----------|----------------------------------------------------------------------------|
| <b>GO Term Molecular Function</b> | GO:0001077 | transcriptional activator activity, RNA polymerase II core promoter proximal region sequence-specific binding | 5.39E-04 | ESRRA, SMAD2, SREBF1, CREB1, MYC, NR1H4, NR1H3, PAX6, E2F4, SOX9, GLIS2    |
| <b>KEGG Pathway</b>               | hsa05218   | Melanoma                                                                                                      | 5.61E-04 | RB1, CDK6, CDKN2A, E2F2, E2F3, PIK3CB, FGFR1, MAPK3                        |
| <b>GO Term Biological Process</b> | GO:0010942 | positive regulation of cell death                                                                             | 5.79E-04 | CDKN1B, DNMT3A, HTRA2, DUSP6, NKX3-1                                       |
| <b>GO Term Biological Process</b> | GO:2001022 | positive regulation of response to DNA damage stimulus                                                        | 6.29E-04 | MYC, FMR1, PRKCD, NKX3-1                                                   |
| <b>GO Term Biological Process</b> | GO:0034162 | toll-like receptor 9 signaling pathway                                                                        | 6.29E-04 | TRAF6, NR1H4, PIK3C3, MYD88                                                |
| <b>KEGG Pathway</b>               | hsa05223   | Non-small cell lung cancer                                                                                    | 6.38E-04 | RB1, CASP9, CDK6, CDKN2A, E2F2, E2F3, PIK3CB, MAPK3                        |
| <b>GO Term Molecular Function</b> | GO:0061630 | ubiquitin protein ligase activity                                                                             | 6.53E-04 | MED1, RNF126, CUL3, TRAF6, CUL1, UBE2A, UBE2V1, UBE2G2, SKP2, RNF2, UBE2J1 |
| <b>GO Term Biological Process</b> | GO:0018105 | peptidyl-serine phosphorylation                                                                               | 6.84E-04 | PRKCI, EPO, CHEK2, PRKCD, EIF2AK3, MAPKAPK5, HIPK2, TAF1, MAPK3            |

|  |                                           |            |                                                                              |          |                                                                                                                                                                                      |
|--|-------------------------------------------|------------|------------------------------------------------------------------------------|----------|--------------------------------------------------------------------------------------------------------------------------------------------------------------------------------------|
|  | <b>GO Term<br/>Biological<br/>Process</b> | GO:0070423 | nucleotide-binding oligomerization<br>domain containing signaling<br>pathway | 6.91E-04 | CHUK, TRAF6, UBE2V1, MAP3K7,<br>MAP2K6                                                                                                                                               |
|  | <b>GO Term<br/>Biological<br/>Process</b> | GO:0007049 | cell cycle                                                                   | 7.07E-04 | RBL2, RBL1, USP22, PRKCD, GPS2,<br>E2F2, E2F3, CCAR2, TAF1, MAPK3,<br>ARF6, HCFC1                                                                                                    |
|  | <b>GO Term<br/>Molecular<br/>Function</b> | GO:0043422 | protein kinase B binding                                                     | 7.92E-04 | TRAF6, PDE3B, SRSF1, RARA                                                                                                                                                            |
|  | <b>GO Term<br/>Biological<br/>Process</b> | GO:0050680 | negative regulation of epithelial<br>cell proliferation                      | 7.97E-04 | RB1, DLG1, CDK6, PAX6, SOX9, NKX3-<br>1                                                                                                                                              |
|  | <b>GO Term<br/>Cellular<br/>Component</b> | GO:0005794 | Golgi apparatus                                                              | 8.83E-04 | MACF1, STX16, CUL3, PDE3B, PSEN1,<br>TGOLN2, CLN3, SNX1, CHEK2,<br>TOPBP1, MAPK3, PRNP, SORT1,<br>AP3B1, SORL1, BACE1, GNPTG, DLG1,<br>GOLPH3, CTTN, ID1, CAT, ALB,<br>KDELRL2, ARF6 |

|  |                                           |            |                                                     |            |                                                                                                   |
|--|-------------------------------------------|------------|-----------------------------------------------------|------------|---------------------------------------------------------------------------------------------------|
|  | <b>GO Term<br/>Molecular<br/>Function</b> | GO:0016301 | kinase activity                                     | 9.77E-04   | STK11, CDKN1B, CHKA, CDKN2A,<br>PRKAR1A, CCNH, PIK3C3, PIK3CB,<br>SKP2, TAF1, PDK1, MAPK3         |
|  | <b>KEGG<br/>Pathway</b>                   | hsa04910   | Insulin signaling pathway                           | 0.00100436 | RPTOR, SREBF1, PRKCI, IRS1,<br>PRKAR1A, INSR, PDE3B, PIK3CB,<br>PCK1, EIF4E, HK2, MAPK3           |
|  | <b>GO Term<br/>Molecular<br/>Function</b> | GO:0098641 | cadherin binding involved in cell-<br>cell adhesion | 0.00105497 | MACF1, HSPA8, TXNDC9, IDH1,<br>PARVA, NDRG1, HCFC1, SDCBP,<br>DLG1, SNX1, PLCB3, CTTN, PFN1, TJP2 |



|                                           |            |                              |            |                                                                                                                                                                                                                                                                   |
|-------------------------------------------|------------|------------------------------|------------|-------------------------------------------------------------------------------------------------------------------------------------------------------------------------------------------------------------------------------------------------------------------|
| <b>GO Term<br/>Molecular<br/>Function</b> | GO:0005524 | ATP binding                  | 0.00110779 | MOCS3, UBE2D1, IDE, PIK3CB, GPHN, HK2, UBE2J1, STK11, MAT2A, CHEK2, PIM2, MAP3K7, MAPK3, MAP2K6, PDK1, HSPA8, PRKCI, KSR1, CHKA, CHUK, INSR, PRKCD, EIF2AK3, UBE2A, UBE2G2, HIPK2, CDK8, CDK6, UBA3, SUCLG2, MAPKAPK5, PIK3C3, ALDH18A1, DNA2, CDK12, FGFR1, TAF1 |
| <b>GO Term<br/>Biological<br/>Process</b> | GO:0070555 | response to interleukin-1    | 0.00111821 | PRKCI, EPO, TRAF6, MTHFR, MYD88                                                                                                                                                                                                                                   |
| <b>GO Term<br/>Biological<br/>Process</b> | GO:0097284 | hepatocyte apoptotic process | 0.00112234 | RB1, DNMT3A, FAS, ARF6                                                                                                                                                                                                                                            |
| <b>KEGG<br/>Pathway</b>                   | hsa04350   | TGF-beta signaling pathway   | 0.00120688 | SMAD2, TFDP1, RBL1, MYC, ID1, CUL1, E2F4, E2F5, MAPK3                                                                                                                                                                                                             |
| <b>GO Term<br/>Cellular<br/>Component</b> | GO:0045121 | membrane raft                | 0.00122209 | BACE1, CLN3, SDCBP, PRNP, DLG1, TRADD, FAS, FADD, PSEN1, BIRC3                                                                                                                                                                                                    |

|                                   |            |                                                              |            |                                                                                                                                                                          |
|-----------------------------------|------------|--------------------------------------------------------------|------------|--------------------------------------------------------------------------------------------------------------------------------------------------------------------------|
| <b>KEGG Pathway</b>               | hsa04668   | TNF signaling pathway                                        | 0.0012382  | CREB1, CHUK, TRADD, FAS, FADD, PIK3CB, MAP3K7, MAP2K6, BIRC3, MAPK3                                                                                                      |
| <b>GO Term Molecular Function</b> | GO:0003700 | transcription factor activity, sequence-specific DNA binding | 0.00131143 | RB1, KDM5B, CSRNP2, MYC, E2F2, E2F3, SOX9, E2F4, E2F5, NKX3-1, ESRRA, SMAD2, SREBF1, TCF7L1, TBP, NR2F1, NR1H4, NR1H3, PAX6, HCFC1, MLXIPL, CREB1, TFDP1, SP4, ID1, RARA |
| <b>GO Term Cellular Component</b> | GO:0010008 | endosome membrane                                            | 0.00134005 | BACE1, SNX1, SORT1, TRAF6, INSR, VPS41, VPS37A, VPS26A, MAP3K7, MYD88                                                                                                    |
| <b>GO Term Biological Process</b> | GO:0033189 | response to vitamin A                                        | 0.00143977 | EPO, DNMT3A, CAT, RARA                                                                                                                                                   |
| <b>GO Term Biological Process</b> | GO:0001657 | ureteric bud development                                     | 0.00148901 | SMAD2, CAT, RARA, SDC1, FGFR1                                                                                                                                            |

|  |                                           |            |                                             |            |                                                                                                |
|--|-------------------------------------------|------------|---------------------------------------------|------------|------------------------------------------------------------------------------------------------|
|  | <b>GO Term<br/>Biological<br/>Process</b> | GO:0043488 | regulation of mRNA stability                | 0.00151024 | HSPA8, PSMA3, PSMA4, PSMD11,<br>PSMD14, APEX1, FMR1, PRKCD                                     |
|  | <b>GO Term<br/>Biological<br/>Process</b> | GO:0043065 | positive regulation of apoptotic<br>process | 0.00154647 | CDKN2A, TRADD, HIP1R, HTRA2,<br>PSEN1, CCAR2, DUSP6, IGF2R, CREB1,<br>TRAF6, FAS, FADD, MAP2K6 |
|  | <b>GO Term<br/>Molecular<br/>Function</b> | GO:0061631 | ubiquitin conjugating enzyme<br>activity    | 0.00155023 | UBE2D1, UBE2A, UBE2G2, TAF1,<br>UBE2J1                                                         |
|  | <b>KEGG<br/>Pathway</b>                   | hsa05162   | Measles                                     | 0.00157718 | HSPA8, CDKN1B, CDK6, CHUK,<br>TRAF6, EIF2AK3, FAS, PIK3CB,<br>MAP3K7, MYD88                    |
|  | <b>GO Term<br/>Biological<br/>Process</b> | GO:0050821 | protein stabilization                       | 0.00160797 | CREB1, CDKN2A, CHEK2, PRKCD,<br>HIP1R, PIM2, PFN1, TAF1, HCFC1                                 |

|  |                                           |            |                                        |            |                                                                                                                                                               |
|--|-------------------------------------------|------------|----------------------------------------|------------|---------------------------------------------------------------------------------------------------------------------------------------------------------------|
|  | <b>GO Term<br/>Cellular<br/>Component</b> | GO:0005783 | endoplasmic reticulum                  | 0.001761   | SREBF1, PRNP, KSR1, PRKCD, PDE3B, EIF2AK3, HTRA2, RRAS2, HMGCR, PSEN1, UBE2G2, TFPI, CYP19A1, SORL1, EEF1B2, CLN3, DLG1, TMX1, APEX1, CAT, ALB, KDELR2, PROM1 |
|  | <b>GO Term<br/>Cellular<br/>Component</b> | GO:0005913 | cell-cell adherens junction            | 0.0019542  | MACF1, HSPA8, TXNDC9, IDH1, PARVA, NDRG1, HCFC1, SDCBP, DLG1, SNX1, PLCB3, CTTN, PFN1, TJP2                                                                   |
|  | <b>GO Term<br/>Biological<br/>Process</b> | GO:0042593 | glucose homeostasis                    | 0.00197913 | MLXIPL, STK11, IRS1, INSR, NR1H4, PAX6, PCK1                                                                                                                  |
|  | <b>GO Term<br/>Biological<br/>Process</b> | GO:0010629 | negative regulation of gene expression | 0.00203707 | RB1, SMAD2, RBL2, KDM4A, CREB1, RBL1, TAF1, NKX3-1                                                                                                            |
|  | <b>KEGG<br/>Pathway</b>                   | hsa05206   | MicroRNAs in cancer                    | 0.00205779 | RPTOR, CDKN1B, SLC45A3, CDK6, IRS1, CDKN2A, MYC, DNMT3A, IGF2BP1, E2F2, E2F3, MCL1                                                                            |

|                                   |            |                                         |            |                                                                                                   |
|-----------------------------------|------------|-----------------------------------------|------------|---------------------------------------------------------------------------------------------------|
| <b>KEGG Pathway</b>               | hsa04066   | HIF-1 signaling pathway                 | 0.00206539 | CDKN1B, EPO, INSR, SERPINE1, PIK3CB, EIF4E, HK2, PDK1, MAPK3                                      |
| <b>GO Term Molecular Function</b> | GO:0046982 | protein heterodimerization activity     | 0.00217227 | SMAD2, CHUK, CUL3, FMR1, H2AFX, METTL3, MLXIPL, SDCBP, SNX1, UBA3, RARA, SUCLG2, SOX9, MCL1, TAF1 |
| <b>GO Term Molecular Function</b> | GO:0046983 | protein dimerization activity           | 0.00221102 | SREBF1, NCOA2, NUP210, MYC, E2F2, E2F3, E2F4, E2F5                                                |
| <b>GO Term Biological Process</b> | GO:0010628 | positive regulation of gene expression  | 0.00221678 | KDM4A, KDM5B, MED1, CDK6, MYC, ID1, EIF2AK3, PAX6, PIK3CB, NKX3-1, HCFC1                          |
| <b>KEGG Pathway</b>               | hsa05145   | Toxoplasmosis                           | 0.0022463  | CASP9, HSPA8, CHUK, TRAF6, MAP3K7, MYD88, MAP2K6, BIRC3, MAPK3                                    |
| <b>GO Term Biological Process</b> | GO:0071222 | cellular response to lipopolysaccharide | 0.00227266 | GFI1, TRAF6, SERPINE1, NR1H4, RARA, NR1H3, TFPI                                                   |
| <b>GO Term Biological Process</b> | GO:0007623 | circadian rhythm                        | 0.00235698 | SREBF1, CREB1, METTL3, ID1, SERPINE1, FAS                                                         |

|                                   |            |                                                                                    |            |                                                                               |
|-----------------------------------|------------|------------------------------------------------------------------------------------|------------|-------------------------------------------------------------------------------|
| <b>GO Term Biological Process</b> | GO:0031145 | anaphase-promoting complex-dependent catabolic process                             | 0.00243116 | PSMA3, PSMA4, PSMD11, PSMD14, CUL3, UBE2D1, SKP2                              |
| <b>GO Term Biological Process</b> | GO:0045787 | positive regulation of cell cycle                                                  | 0.0024724  | CDKN1B, MYC, RARA, FGFR1, HCFC1                                               |
| <b>GO Term Biological Process</b> | GO:0046777 | protein autophosphorylation                                                        | 0.00251856 | STK11, CHEK2, INSR, EIF2AK3, MAPKAPK5, PIM2, CDK12, FGFR1, TAF1               |
| <b>GO Term Biological Process</b> | GO:0006338 | chromatin remodeling                                                               | 0.00259785 | RB1, PBRM1, MYC, MORF4L2, SOX9, DMAP1, BPTF                                   |
| <b>KEGG Pathway</b>               | hsa05168   | Herpes simplex infection                                                           | 0.00261402 | TBP, CHUK, TRAF6, SRSF1, CUL1, EIF2AK3, FAS, FADD, SKP2, MAP3K7, MYD88, HCFC1 |
| <b>GO Term Biological Process</b> | GO:0051092 | positive regulation of NF-kappaB transcription factor activity                     | 0.00269611 | PRKCI, CHUK, TRAF6, TRADD, CAT, UBE2V1, MAP3K7, MYD88                         |
| <b>GO Term Biological Process</b> | GO:0043123 | positive regulation of I-kappaB kinase/NF-kappaB signaling                         | 0.00276712 | CHUK, TRAF6, TRADD, PIM2, FADD, UBE2V1, MAP3K7, MYD88, BIRC3                  |
| <b>GO Term Biological Process</b> | GO:0043433 | negative regulation of sequence-specific DNA binding transcription factor activity | 0.00278616 | RB1, PRNP, SUFU, ID1, RNF2, GLIS2                                             |

|                                   |            |                                          |            |                                                                                                                        |
|-----------------------------------|------------|------------------------------------------|------------|------------------------------------------------------------------------------------------------------------------------|
| <b>KEGG Pathway</b>               | hsa04930   | Type II diabetes mellitus                | 0.00298516 | IRS1, INSR, PRKCD, PIK3CB, HK2, MAPK3                                                                                  |
| <b>GO Term Biological Process</b> | GO:0006915 | apoptotic process                        | 0.003029   | RB1, CSRNP2, CDKN2A, EPO, TRADD, PRKCD, HIP1R, CUL1, CASP9, DAD1, FAS, PIM2, FADD, MAP3K7, MYD88, MAP2K6, BIRC3, MAPK3 |
| <b>GO Term Biological Process</b> | GO:0030522 | intracellular receptor signaling pathway | 0.00310046 | ESRRA, NCOA2, NR2F1, NR1H4, NR1H3                                                                                      |
| <b>GO Term Biological Process</b> | GO:0043550 | regulation of lipid kinase activity      | 0.00311241 | RB1, RBL2, RBL1                                                                                                        |
| <b>KEGG Pathway</b>               | hsa04620   | Toll-like receptor signaling pathway     | 0.00344038 | CHUK, TRAF6, FADD, PIK3CB, MAP3K7, MYD88, MAP2K6, MAPK3                                                                |
| <b>GO Term Biological Process</b> | GO:0000278 | mitotic cell cycle                       | 0.00345188 | TFDP1, CUL3, DNMT3A, E2F4, RNF2                                                                                        |
| <b>KEGG Pathway</b>               | hsa05221   | Acute myeloid leukemia                   | 0.00388989 | TCF7L1, CHUK, MYC, RARA, PIM2, PIK3CB, MAPK3                                                                           |
| <b>KEGG Pathway</b>               | hsa04210   | Apoptosis                                | 0.00429955 | CASP9, CHUK, TRADD, FAS, FADD, PIK3CB, BIRC3                                                                           |

|                                           |            |                                                                                                   |            |                                                                                                 |
|-------------------------------------------|------------|---------------------------------------------------------------------------------------------------|------------|-------------------------------------------------------------------------------------------------|
| <b>GO Term<br/>Biological<br/>Process</b> | GO:0060770 | negative regulation of epithelial<br>cell proliferation involved in<br>prostate gland development | 0.00461335 | STK11, CDKN1B, NKX3-1                                                                           |
| <b>GO Term<br/>Molecular<br/>Function</b> | GO:0003682 | chromatin binding                                                                                 | 0.00463125 | BRD3, SMAD2, SREBF1, NCOA2,<br>MED1, PBRM1, FMR1, DNMT3A, PAX6,<br>RNF2, HCFC1, WAC, RCC1, SOX9 |
| <b>GO Term<br/>Cellular<br/>Component</b> | GO:0005856 | cytoskeleton                                                                                      | 0.00464619 | MACF1, TRADD, HIP1R, HTRA2,<br>PARVA, GPHN, SDCBP, CTTN, PFN1,<br>UTRN, FERMT2, MAP2K6, MAPK3   |
| <b>KEGG<br/>Pathway</b>                   | hsa04152   | AMPK signaling pathway                                                                            | 0.00484507 | RPTOR, SREBF1, STK11, CREB1, IRS1,<br>INSR, HMGCR, PIK3CB, PCK1,<br>MAP3K7                      |
| <b>GO Term<br/>Molecular<br/>Function</b> | GO:0016922 | ligand-dependent nuclear receptor<br>binding                                                      | 0.00486972 | NCOA2, MED1, NR1H4, UBA3                                                                        |
| <b>GO Term<br/>Molecular<br/>Function</b> | GO:0000978 | RNA polymerase II core promoter<br>proximal region sequence-specific<br>DNA binding               | 0.00491181 | ESRRA, SMAD2, SREBF1, NCOA2,<br>MED1, MLXIPL, CREB1, TBP, MYC,<br>NR1H3, PAX6, E2F4             |



|                                   |            |                                                                                  |            |                                                                                      |
|-----------------------------------|------------|----------------------------------------------------------------------------------|------------|--------------------------------------------------------------------------------------|
| <b>GO Term Biological Process</b> | GO:1901796 | regulation of signal transduction by p53 class mediator                          | 0.0049419  | STK11, TBP, CHEK2, MAPKAPK5, TOPBP1, DNA2, HIPK2, TAF1                               |
| <b>GO Term Biological Process</b> | GO:0008285 | negative regulation of cell proliferation                                        | 0.00520422 | RB1, SMAD2, PBRM1, CDKN1B, CDKN2A, CUL1, NDRG1, STK11, CDK6, RARA, CD9, PIM2, NKX3-1 |
| <b>GO Term Biological Process</b> | GO:0033209 | tumor necrosis factor-mediated signaling pathway                                 | 0.00562965 | PSMA3, PSMA4, PSMD11, PSMD14, TRADD, FAS, BIRC3                                      |
| <b>KEGG Pathway</b>               | hsa05214   | Glioma                                                                           | 0.00572027 | RB1, CDK6, CDKN2A, E2F2, E2F3, PIK3CB, MAPK3                                         |
| <b>GO Term Biological Process</b> | GO:0007265 | Ras protein signal transduction                                                  | 0.00581351 | RB1, SDCBP, KSR1, CDKN2A, RRAS2, MAPKAPK5                                            |
| <b>GO Term Cellular Component</b> | GO:0031264 | death-inducing signaling complex                                                 | 0.00588087 | TRADD, FAS, FADD                                                                     |
| <b>GO Term Biological Process</b> | GO:1900182 | positive regulation of protein localization to nucleus                           | 0.0060222  | STK11, CDKN2A, EIF2AK3, GLIS2                                                        |
| <b>GO Term Biological Process</b> | GO:0032435 | negative regulation of proteasomal ubiquitin-dependent protein catabolic process | 0.0060222  | SDCBP, WAC, CCAR2, SENP1                                                             |
| <b>KEGG Pathway</b>               | hsa05219   | Bladder cancer                                                                   | 0.00625155 | RB1, CDKN2A, MYC, E2F2, E2F3, MAPK3                                                  |

|  |                                           |            |                                    |            |                                                                                                                                                                                                                                                                                                                 |
|--|-------------------------------------------|------------|------------------------------------|------------|-----------------------------------------------------------------------------------------------------------------------------------------------------------------------------------------------------------------------------------------------------------------------------------------------------------------|
|  | <b>GO Term<br/>Molecular<br/>Function</b> | GO:0003707 | steroid hormone receptor activity  | 0.00665594 | ESRRA, NR2F1, NR1H4, RARA, NR1H3                                                                                                                                                                                                                                                                                |
|  | <b>GO Term<br/>Biological<br/>Process</b> | GO:0098609 | cell-cell adhesion                 | 0.00666275 | HSPA8, SDCBP, MACF1, SNX1, PLCB3, TXNDC9, CTTN, IDH1, PFN1, NDRG1, TJP2, HCFC1                                                                                                                                                                                                                                  |
|  | <b>GO Term<br/>Biological<br/>Process</b> | GO:0071347 | cellular response to interleukin-1 | 0.00669213 | MYC, SOX9, PCK1, TFPI, NKX3-1                                                                                                                                                                                                                                                                                   |
|  | <b>GO Term<br/>Cellular<br/>Component</b> | GO:0016020 | membrane                           | 0.00687469 | PSMD11, STX16, CUL3, FMR1, PDE3B, HTRA2, PSEN1, CYP19A1, LCLAT1, HK2, CLN3, SDCBP, STK11, SNX1, LBR, MCL1, UBL4A, MED1, HSPA8, KSR1, NUP210, INSR, PRKCD, INTS2, COG2, EIF2AK3, RRAS2, AP3B1, SDHC, SORL1, IGF2R, HCFC1, PLCB3, DAD1, PRKAR1A, AGO4, VPS41, PEX5, CAT, CD9, FAS, SDC1, PIK3C3, PFN1, UTRN, ARF6 |

|                                   |            |                                       |            |                                                                                         |
|-----------------------------------|------------|---------------------------------------|------------|-----------------------------------------------------------------------------------------|
| <b>KEGG Pathway</b>               | hsa05166   | HTLV-I infection                      | 0.0068758  | RB1, SMAD2, TBP, CHUK, CDKN2A, RRAS2, GPS2, PIK3CB, DLG1, CREB1, CHEK2, MYC, E2F2, E2F3 |
| <b>KEGG Pathway</b>               | hsa05203   | Viral carcinogenesis                  | 0.00692377 | RB1, CDKN1B, TBP, CDKN2A, TRADD, PIK3CB, RBL2, DLG1, CREB1, RBL1, CDK6, SKP2, MAPK3     |
| <b>GO Term Molecular Function</b> | GO:0004871 | signal transducer activity            | 0.0072138  | PLCB3, CHKA, IRS1, SUFU, TRADD, FAS, GNB5, DKK1, BCAR1                                  |
| <b>GO Term Biological Process</b> | GO:0032869 | cellular response to insulin stimulus | 0.00750318 | PRKCI, IRS1, MYC, INSR, PDE3B, PCK1                                                     |
| <b>GO Term Cellular Component</b> | GO:0031985 | Golgi cisterna                        | 0.00775238 | GOLPH3, STX16, SORL1                                                                    |
| <b>GO Term Biological Process</b> | GO:0009636 | response to toxic substance           | 0.00797383 | CHUK, CHKA, DNMT3A, FAS, SDC1, MAPK3                                                    |
| <b>GO Term Molecular Function</b> | GO:0030295 | protein kinase activator activity     | 0.00821258 | RPTOR, STK11, EPO, NKX3-1                                                               |
| <b>GO Term Molecular Function</b> | GO:0050661 | NADP binding                          | 0.00821258 | IDH1, CAT, MTHFR, HMGCR                                                                 |

|  |                                           |            |                                                     |            |                                                                                                                           |
|--|-------------------------------------------|------------|-----------------------------------------------------|------------|---------------------------------------------------------------------------------------------------------------------------|
|  | <b>GO Term<br/>Biological<br/>Process</b> | GO:0006975 | DNA damage induced protein phosphorylation          | 0.00840934 | CHEK2, MAP2K6, MAPK3                                                                                                      |
|  | <b>GO Term<br/>Biological<br/>Process</b> | GO:0071300 | cellular response to retinoic acid                  | 0.00854393 | MYC, RARA, HTRA2, SOX9, PCK1                                                                                              |
|  | <b>GO Term<br/>Biological<br/>Process</b> | GO:0043401 | steroid hormone mediated signaling pathway          | 0.00854393 | ESRRA, NR2F1, NR1H4, RARA, NR1H3                                                                                          |
|  | <b>KEGG<br/>Pathway</b>                   | hsa04931   | Insulin resistance                                  | 0.00869408 | SREBF1, MLXIPL, CREB1, IRS1, INSR, PRKCD, NR1H3, PIK3CB, PCK1                                                             |
|  | <b>GO Term<br/>Cellular<br/>Component</b> | GO:0009986 | cell surface                                        | 0.0092191  | PRNP, SORT1, EPO, IDE, PSEN1, TFPI, IGF2R, BACE1, RARA, FAS, SDC1, PROM1, FERMT2                                          |
|  | <b>GO Term<br/>Molecular<br/>Function</b> | GO:0042803 | protein homodimerization activity                   | 0.00951849 | SMAD2, CHUK, CHKA, CUL3, IDH1, FMR1, HIP1R, EIF2AK3, HMGCR, IDE, MLXIPL, SDCBP, GNPTG, SNX1, CHEK2, ID1, CAT, MCL1, FGFR1 |
|  | <b>GO Term<br/>Biological<br/>Process</b> | GO:0035666 | TRIF-dependent toll-like receptor signaling pathway | 0.00987968 | CHUK, UBE2D1, FADD, BIRC3                                                                                                 |

|                                           |            |                                                                                                                            |            |                                                                                                        |
|-------------------------------------------|------------|----------------------------------------------------------------------------------------------------------------------------|------------|--------------------------------------------------------------------------------------------------------|
| <b>GO Term<br/>Biological<br/>Process</b> | GO:0048661 | positive regulation of smooth<br>muscle cell proliferation                                                                 | 0.0099478  | MYC, TRAF6, HMGCR, SKP2, MYD88                                                                         |
| <b>GO Term<br/>Cellular<br/>Component</b> | GO:0005768 | endosome                                                                                                                   | 0.00998355 | BACE1, TGOLN2, PRKCI, GOLPH3,<br>CDKN1B, VPS26A, SORL1, IGF2R,<br>ARF6                                 |
| <b>GO Term<br/>Biological<br/>Process</b> | GO:0051437 | positive regulation of ubiquitin-<br>protein ligase activity involved in<br>regulation of mitotic cell cycle<br>transition | 0.01006179 | PSMA3, PSMA4, PSMD11, PSMD14,<br>CUL1, UBE2D1                                                          |
| <b>GO Term<br/>Molecular<br/>Function</b> | GO:0048027 | mRNA 5'-UTR binding                                                                                                        | 0.01017059 | FMR1, IGF2BP1, RARA                                                                                    |
| <b>GO Term<br/>Molecular<br/>Function</b> | GO:0016303 | 1-phosphatidylinositol-3-kinase<br>activity                                                                                | 0.0102827  | IRS1, PIK3C3, PIK3CB, FGFR1                                                                            |
| <b>GO Term<br/>Molecular<br/>Function</b> | GO:0004674 | protein serine/threonine kinase<br>activity                                                                                | 0.01087825 | PRKCI, PRKCD, EIF2AK3, HIPK2,<br>CDK8, STK11, CHEK2, MAPKAPK5,<br>PIM2, MAP3K7, MAP2K6, TAF1,<br>MAPK3 |
| <b>GO Term<br/>Biological<br/>Process</b> | GO:0043967 | histone H4 acetylation                                                                                                     | 0.01102248 | MORF4L2, USP22, DMAP1, BRCA2                                                                           |
| <b>KEGG<br/>Pathway</b>                   | hsa00020   | Citrate cycle (TCA cycle)                                                                                                  | 0.01104425 | FH, IDH1, SUCLG2, SDHC, PCK1                                                                           |

|                                           |            |                                                                                               |            |                                                                                                |
|-------------------------------------------|------------|-----------------------------------------------------------------------------------------------|------------|------------------------------------------------------------------------------------------------|
| <b>GO Term<br/>Biological<br/>Process</b> | GO:0042981 | regulation of apoptotic process                                                               | 0.01105491 | CASP9, FAS, FADD, SOX9, SKP2,<br>NDRG1, BCAR1, MCL1, BIRC3                                     |
| <b>GO Term<br/>Biological<br/>Process</b> | GO:0032868 | response to insulin                                                                           | 0.01149332 | SORT1, IRS1, CAT, GGH, PCK1                                                                    |
| <b>GO Term<br/>Molecular<br/>Function</b> | GO:0019901 | protein kinase binding                                                                        | 0.01188889 | SREBF1, CDKN2A, PRKCD, PAX6,<br>CASP9, RPTOR, DLG1, CHEK2, SUFU,<br>TRAF6, UTRN, BCAR1, MAP2K6 |
| <b>GO Term<br/>Biological<br/>Process</b> | GO:1902042 | negative regulation of extrinsic<br>apoptotic signaling pathway via<br>death domain receptors | 0.01223849 | TRADD, SERPINE1, FAS, FADD                                                                     |
| <b>GO Term<br/>Biological<br/>Process</b> | GO:0097192 | extrinsic apoptotic signaling<br>pathway in absence of ligand                                 | 0.01223849 | CASP9, FAS, FADD, MCL1                                                                         |
| <b>GO Term<br/>Biological<br/>Process</b> | GO:0045931 | positive regulation of mitotic cell<br>cycle                                                  | 0.01223849 | USP22, BRCA2, EIF4E, NKX3-1                                                                    |
| <b>GO Term<br/>Biological<br/>Process</b> | GO:0007249 | I-kappaB kinase/NF-kappaB<br>signaling                                                        | 0.01232074 | CHUK, TRAF6, TRADD, MAP3K7,<br>BIRC3                                                           |
| <b>GO Term<br/>Molecular<br/>Function</b> | GO:0043560 | insulin receptor substrate binding                                                            | 0.0125674  | INSR, PRKCD, PIK3CB                                                                            |

|                                           |            |                                                        |            |                                                                                                                      |
|-------------------------------------------|------------|--------------------------------------------------------|------------|----------------------------------------------------------------------------------------------------------------------|
| <b>GO Term<br/>Cellular<br/>Component</b> | GO:0048471 | perinuclear region of cytoplasm                        | 0.01303172 | SORT1, STX16, FMR1, PRKCD, HIP1R, EIF2AK3, NDRG1, IGF2R, DLG1, INF2, APEX1, TRAF6, IGF2BP1, RARA, AGGF1, EIF4E, BPTF |
| <b>GO Term<br/>Biological<br/>Process</b> | GO:0045821 | positive regulation of glycolytic process              | 0.01319855 | MLXIPL, MYC, INSR                                                                                                    |
| <b>GO Term<br/>Biological<br/>Process</b> | GO:0045723 | positive regulation of fatty acid biosynthetic process | 0.01319855 | MLXIPL, SLC45A3, NR1H3                                                                                               |
| <b>GO Term<br/>Biological<br/>Process</b> | GO:0006099 | tricarboxylic acid cycle                               | 0.01352843 | FH, IDH1, SUCLG2, SDHC                                                                                               |
| <b>GO Term<br/>Molecular<br/>Function</b> | GO:0001047 | core promoter binding                                  | 0.01379464 | RB1, MED1, E2F2, E2F3, NKX3-1                                                                                        |
| <b>GO Term<br/>Molecular<br/>Function</b> | GO:0043565 | sequence-specific DNA binding                          | 0.0139103  | ESRRA, TCF7L1, CSRN2, NR2F1, NR1H4, NR1H3, PAX6, CREB1, MYC, RARA, BPTF, TAF1, NKX3-1                                |
| <b>GO Term<br/>Biological<br/>Process</b> | GO:0051291 | protein heterooligomerization                          | 0.01408772 | MAT2A, TRADD, FADD, IDE, BIRC3                                                                                       |

|  |                                           |            |                                                                                                       |            |                                                     |
|--|-------------------------------------------|------------|-------------------------------------------------------------------------------------------------------|------------|-----------------------------------------------------|
|  | <b>GO Term<br/>Biological<br/>Process</b> | GO:0007179 | transforming growth factor beta<br>receptor signaling pathway                                         | 0.01456664 | SMAD2, CREB1, ID1, MAP3K7,<br>FERMT2, HIPK2         |
|  | <b>GO Term<br/>Cellular<br/>Component</b> | GO:0005802 | trans-Golgi network                                                                                   | 0.01463195 | BACE1, TGOLN2, CLN3, GOLPH3,<br>STX16, SORL1, IGF2R |
|  | <b>GO Term<br/>Cellular<br/>Component</b> | GO:0001741 | XY body                                                                                               | 0.01471797 | H2AFX, DNMT3A, UBE2A                                |
|  | <b>GO Term<br/>Cellular<br/>Component</b> | GO:0035631 | CD40 receptor complex                                                                                 | 0.01471797 | CHUK, TRAF6, HTRA2                                  |
|  | <b>GO Term<br/>Molecular<br/>Function</b> | GO:0004879 | RNA polymerase II transcription<br>factor activity, ligand-activated<br>sequence-specific DNA binding | 0.01525628 | ESRRA, NR2F1, NR1H4, NR1H3                          |
|  | <b>GO Term<br/>Biological<br/>Process</b> | GO:0035729 | cellular response to hepatocyte<br>growth factor stimulus                                             | 0.015942   | MED1, CREB1, BCAR1                                  |
|  | <b>GO Term<br/>Biological<br/>Process</b> | GO:0030837 | negative regulation of actin<br>filament polymerization                                               | 0.015942   | PRKCD, HIP1R, PFN1                                  |
|  | <b>GO Term<br/>Biological<br/>Process</b> | GO:0071260 | cellular response to mechanical<br>stimulus                                                           | 0.01600772 | FAS, FADD, SOX9, MYD88, MAPK3                       |
|  | <b>KEGG<br/>Pathway</b>                   | hsa04150   | mTOR signaling pathway                                                                                | 0.0162279  | RPTOR, STK11, IRS1, PIK3CB, EIF4E,<br>MAPK3         |



|                                           |            |                                                          |            |                                                                                                                                                                          |
|-------------------------------------------|------------|----------------------------------------------------------|------------|--------------------------------------------------------------------------------------------------------------------------------------------------------------------------|
| <b>GO Term<br/>Molecular<br/>Function</b> | GO:0032403 | protein complex binding                                  | 0.01670111 | RPTOR, SREBF1, CDKN1B, MYC,<br>APEX1, TRADD, COG2, MTHFR, FADD                                                                                                           |
| <b>KEGG<br/>Pathway</b>                   | hsa04120   | Ubiquitin mediated proteolysis                           | 0.01749836 | CUL3, TRAF6, CUL1, UBA3, UBE2D1,<br>UBE2A, UBE2G2, SKP2, UBE2J1, BIRC3                                                                                                   |
| <b>GO Term<br/>Biological<br/>Process</b> | GO:0007165 | signal transduction                                      | 0.01750524 | CHKA, EPO, IRS1, TRADD, PRKCD,<br>PDE3B, NR2F1, NR1H4, PIK3CB, TXN,<br>SORL1, IGF2R, CREB1, CDKN2AIPNL,<br>SUFU, RARA, FAS, MAPKAPK5,<br>FADD, SOX9, GNB5, MYD88, MAP2K6 |
| <b>KEGG<br/>Pathway</b>                   | hsa05230   | Central carbon metabolism in<br>cancer                   | 0.01759879 | MYC, PIK3CB, HK2, FGFR1, PDK1,<br>MAPK3                                                                                                                                  |
| <b>GO Term<br/>Biological<br/>Process</b> | GO:0036092 | phosphatidylinositol-3-phosphate<br>biosynthetic process | 0.01784717 | IRS1, PIK3C3, PIK3CB, FGFR1                                                                                                                                              |
| <b>GO Term<br/>Biological<br/>Process</b> | GO:0060070 | canonical Wnt signaling pathway                          | 0.01808455 | STK11, TCF7L1, MYC, SDC1, PSEN1                                                                                                                                          |

|                                   |            |                                                                                            |            |                                                         |
|-----------------------------------|------------|--------------------------------------------------------------------------------------------|------------|---------------------------------------------------------|
| <b>KEGG Pathway</b>               | hsa04380   | Osteoclast differentiation                                                                 | 0.01855482 | CREB1, CHUK, TRAF6, FHL2, PIK3CB, MAP3K7, MAP2K6, MAPK3 |
| <b>GO Term Cellular Component</b> | GO:0009898 | cytoplasmic side of plasma membrane                                                        | 0.01890374 | DLG1, CHUK, TRAF6, HTRA2                                |
| <b>GO Term Biological Process</b> | GO:0048009 | insulin-like growth factor receptor signaling pathway                                      | 0.01890593 | IRS1, EIF2AK3, IGF2R                                    |
| <b>GO Term Biological Process</b> | GO:0097296 | activation of cysteine-type endopeptidase activity involved in apoptotic signaling pathway | 0.01890593 | TRADD, FAS, FADD                                        |
| <b>GO Term Biological Process</b> | GO:0051262 | protein tetramerization                                                                    | 0.01943767 | FH, PEX5, CAT, HMGCR                                    |
| <b>GO Term Molecular Function</b> | GO:0008022 | protein C-terminus binding                                                                 | 0.02007318 | SDCBP, DLG1, KSR1, ID1, PEX5, SDC1, TOPBP1, BRCA2       |

|                                           |            |                                                                        |            |                                                                                                                                                                                                                                   |
|-------------------------------------------|------------|------------------------------------------------------------------------|------------|-----------------------------------------------------------------------------------------------------------------------------------------------------------------------------------------------------------------------------------|
| <b>GO Term<br/>Cellular<br/>Component</b> | GO:0005739 | mitochondrion                                                          | 0.02051707 | FH, HTRA2, IDE, PSEN1, MAT2B, TXN,<br>SYNE2, CASP9, CLN3, STK11, MYC,<br>MCL1, MAPK3, PDK1, PRNP,<br>CDKN2A, CCDC58, IDH1, HIP1R,<br>SIRT5, SDHC, HCFC1, GOLPH3,<br>TFDP1, APEX1, TRAF6, PEX5, CAT,<br>SUCLG2, ALDH18A1, SLC25A12 |
| <b>GO Term<br/>Biological<br/>Process</b> | GO:1901215 | negative regulation of neuron<br>death                                 | 0.02110401 | CREB1, EPO, HTRA2, SORL1                                                                                                                                                                                                          |
| <b>GO Term<br/>Biological<br/>Process</b> | GO:0071363 | cellular response to growth factor<br>stimulus                         | 0.02110401 | INSR, CAT, HTRA2, PFN1                                                                                                                                                                                                            |
| <b>GO Term<br/>Biological<br/>Process</b> | GO:0071364 | cellular response to epidermal<br>growth factor stimulus               | 0.02110401 | MED1, MYC, ID1, SOX9                                                                                                                                                                                                              |
| <b>GO Term<br/>Biological<br/>Process</b> | GO:0008625 | extrinsic apoptotic signaling<br>pathway via death domain<br>receptors | 0.02110401 | SORT1, TRADD, FAS, FADD                                                                                                                                                                                                           |
| <b>GO Term<br/>Biological<br/>Process</b> | GO:0030838 | positive regulation of actin<br>filament polymerization                | 0.02110401 | DLG1, CTTN, PFN1, ARF6                                                                                                                                                                                                            |

|  |                                   |            |                                                                                                                 |            |                                                                                      |
|--|-----------------------------------|------------|-----------------------------------------------------------------------------------------------------------------|------------|--------------------------------------------------------------------------------------|
|  | <b>GO Term Biological Process</b> | GO:0006977 | DNA damage response, signal transduction by p53 class mediator resulting in cell cycle arrest                   | 0.02150113 | RBL2, CDKN1B, TFDP1, CHEK2, E2F4                                                     |
|  | <b>KEGG Pathway</b>               | hsa05152   | Tuberculosis                                                                                                    | 0.02174839 | CASP9, CREB1, KSR1, TRAF6, TRADD, PIK3C3, FADD, MYD88, MAPK3                         |
|  | <b>GO Term Biological Process</b> | GO:0044257 | cellular protein catabolic process                                                                              | 0.0220816  | CHEK2, HTRA2, UBE2G2                                                                 |
|  | <b>GO Term Biological Process</b> | GO:0006978 | DNA damage response, signal transduction by p53 class mediator resulting in transcription of p21 class mediator | 0.0220816  | CHEK2, BRCA2, HIPK2                                                                  |
|  | <b>GO Term Biological Process</b> | GO:0007219 | Notch signaling pathway                                                                                         | 0.02211821 | CDKN1B, CDK6, MYC, NR1H4, SOX9, PSEN1                                                |
|  | <b>GO Term Biological Process</b> | GO:0070534 | protein K63-linked ubiquitination                                                                               | 0.02284629 | RNF126, CDKN2A, TRAF6, UBE2V1                                                        |
|  | <b>GO Term Biological Process</b> | GO:0043161 | proteasome-mediated ubiquitin-dependent protein catabolic process                                               | 0.02290821 | PSMA3, RNF126, PSMA4, PSMD11, PSMD14, CUL3, CUL1, UBE2D1, UBE2A                      |
|  | <b>GO Term Biological Process</b> | GO:0006357 | regulation of transcription from RNA polymerase II promoter                                                     | 0.02319085 | RB1, BRD3, SREBF1, TCF7L1, EPO, FHL2, RBL2, MLXIPL, CREB1, RBL1, TFDP1, PRKAR1A, SP4 |

|  |                                   |            |                                                           |            |                                                                                                                                                         |
|--|-----------------------------------|------------|-----------------------------------------------------------|------------|---------------------------------------------------------------------------------------------------------------------------------------------------------|
|  | <b>GO Term Cellular Component</b> | GO:0030140 | trans-Golgi network transport vesicle                     | 0.02353955 | TGOLN2, SORT1, IGF2R                                                                                                                                    |
|  | <b>GO Term Molecular Function</b> | GO:0004842 | ubiquitin-protein transferase activity                    | 0.023824   | ZYG11B, CUL3, TRAF6, CUL1, UBE2D1, PAX6, UBE2A, UBE2G2, SKP2, RNF2, BIRC3                                                                               |
|  | <b>GO Term Molecular Function</b> | GO:0008353 | RNA polymerase II carboxy-terminal domain kinase activity | 0.02427189 | CDK8, CCNH, CDK12                                                                                                                                       |
|  | <b>GO Term Molecular Function</b> | GO:0043621 | protein self-association                                  | 0.0248574  | VPS41, ID1, MYD88, NKX3-1                                                                                                                               |
|  | <b>GO Term Biological Process</b> | GO:0006898 | receptor-mediated endocytosis                             | 0.0251096  | CLN3, CTTN, ALB, HIP1R, SORL1, IGF2R                                                                                                                    |
|  | <b>GO Term Biological Process</b> | GO:0045879 | negative regulation of smoothened signaling pathway       | 0.02546049 | RB1, SUFU, GLIS2                                                                                                                                        |
|  | <b>GO Term Cellular Component</b> | GO:0005730 | nucleolus                                                 | 0.025801   | ESRRA, HSPA8, KDM4A, MED1, CDKN2A, FMR1, PIK3CB, RBL2, CDK8, CDKN2AIPNL, TMX1, EWSR1, MYC, APEX1, MORF4L2, TRAF6, CDK12, SKP2, E2F5, KDM7A, BCAR1, TAF1 |

|                                           |            |                                        |            |                                                        |
|-------------------------------------------|------------|----------------------------------------|------------|--------------------------------------------------------|
| <b>GO Term<br/>Biological<br/>Process</b> | GO:0007346 | regulation of mitotic cell cycle       | 0.02655861 | RB1, SDCBP, MYC, PIM2                                  |
| <b>GO Term<br/>Biological<br/>Process</b> | GO:0032526 | response to retinoic acid              | 0.02655861 | SREBF1, RARA, DKK1, IGF2R                              |
| <b>GO Term<br/>Cellular<br/>Component</b> | GO:0031527 | filopodium membrane                    | 0.02685659 | UTRN, SYNE2, ARF6                                      |
| <b>GO Term<br/>Molecular<br/>Function</b> | GO:0003714 | transcription corepressor activity     | 0.0269059  | KDM5B, SUFU, APEX1, NR1H4, RARA,<br>GPS2, DMAP1, HIPK2 |
| <b>GO Term<br/>Cellular<br/>Component</b> | GO:0032588 | trans-Golgi network membrane           | 0.02707113 | TGOLN2, STX16, AP4E1, COG2, IGF2R                      |
| <b>KEGG<br/>Pathway</b>                   | hsa01200   | Carbon metabolism                      | 0.0282973  | FH, PSAT1, IDH1, CAT, SUCLG2,<br>MTHFR, SDHC, HK2      |
| <b>GO Term<br/>Biological<br/>Process</b> | GO:0030521 | androgen receptor signaling<br>pathway | 0.02852843 | RB1, MED1, FHL2, NKX3-1                                |
| <b>GO Term<br/>Biological<br/>Process</b> | GO:0071398 | cellular response to fatty acid        | 0.02903433 | SREBF1, CREB1, NR1H4                                   |

|                                   |            |                                                                                |            |                                                                                    |
|-----------------------------------|------------|--------------------------------------------------------------------------------|------------|------------------------------------------------------------------------------------|
| <b>KEGG Pathway</b>               | hsa04010   | MAPK signaling pathway                                                         | 0.02926787 | HSPA8, CHUK, MYC, TRAF6, RRAS2, FAS, MAPKAPK5, MAP3K7, DUSP6, FGFR1, MAP2K6, MAPK3 |
| <b>GO Term Cellular Component</b> | GO:0005782 | peroxisomal matrix                                                             | 0.02937749 | IDH1, PEX5, CAT, IDE                                                               |
| <b>KEGG Pathway</b>               | hsa05010   | Alzheimer's disease                                                            | 0.03035267 | BACE1, CASP9, PLCB3, EIF2AK3, FAS, SDHC, FADD, IDE, PSEN1, MAPK3                   |
| <b>KEGG Pathway</b>               | hsa05210   | Colorectal cancer                                                              | 0.03136693 | SMAD2, CASP9, TCF7L1, MYC, PIK3CB, MAPK3                                           |
| <b>GO Term Biological Process</b> | GO:0034644 | cellular response to UV                                                        | 0.03269424 | CASP9, MYC, FMR1, TAF1                                                             |
| <b>GO Term Biological Process</b> | GO:0007254 | JNK cascade                                                                    | 0.03269424 | TRAF6, GPS2, MAP3K7, MYD88                                                         |
| <b>GO Term Biological Process</b> | GO:0001894 | tissue homeostasis                                                             | 0.03279509 | RB1, STK11, SOX9                                                                   |
| <b>GO Term Biological Process</b> | GO:1902041 | regulation of extrinsic apoptotic signaling pathway via death domain receptors | 0.03279509 | TRADD, FAS, FADD                                                                   |

|                                   |            |                                                                         |            |                                                      |
|-----------------------------------|------------|-------------------------------------------------------------------------|------------|------------------------------------------------------|
| <b>GO Term Biological Process</b> | GO:0070371 | ERK1 and ERK2 cascade                                                   | 0.03279509 | MED1, SOX9, MAPK3                                    |
| <b>GO Term Cellular Component</b> | GO:0045171 | intercellular bridge                                                    | 0.03342417 | ESRRA, PRKCI, SP4, PIK3CB                            |
| <b>GO Term Molecular Function</b> | GO:0044212 | transcription regulatory region DNA binding                             | 0.0335031  | TCF7L1, CREB1, TBP, GFI1, NR1H3, GLIS2, TAF1, NKX3-1 |
| <b>GO Term Cellular Component</b> | GO:0048269 | methionine adenosyltransferase complex                                  | 0.03422257 | MAT2A, MAT2B                                         |
| <b>GO Term Molecular Function</b> | GO:0051087 | chaperone binding                                                       | 0.03438657 | UBL4A, PRNP, CDKN1B, ALB, GNB5                       |
| <b>GO Term Molecular Function</b> | GO:0032810 | sterol response element binding                                         | 0.03478727 | SREBF1, NR1H3                                        |
| <b>GO Term Molecular Function</b> | GO:0008798 | beta-aspartyl-peptidase activity                                        | 0.03478727 | BACE1, ASRGL1                                        |
| <b>GO Term Molecular Function</b> | GO:0016890 | site-specific endodeoxyribonuclease activity, specific for altered base | 0.03478727 | APEX1, DNA2                                          |
| <b>GO Term Molecular Function</b> | GO:1990841 | promoter-specific chromatin binding                                     | 0.03505098 | RBL2, RBL1, E2F4                                     |
| <b>GO Term Molecular Function</b> | GO:0045296 | cadherin binding                                                        | 0.03505098 | PSEN1, PROM1, NDRG1                                  |



|                                   |            |                                                                                         |            |                                                |
|-----------------------------------|------------|-----------------------------------------------------------------------------------------|------------|------------------------------------------------|
| <b>GO Term Biological Process</b> | GO:0071456 | cellular response to hypoxia                                                            | 0.03560084 | DNMT3A, PCK1, NDRG1, HIPK2, NKX3-1             |
| <b>GO Term Biological Process</b> | GO:0048015 | phosphatidylinositol-mediated signaling                                                 | 0.03560084 | IRS1, AGO4, PIK3C3, PIK3CB, FGFR1              |
| <b>GO Term Biological Process</b> | GO:0030858 | positive regulation of epithelial cell differentiation                                  | 0.03568395 | PAX6, SOX9                                     |
| <b>GO Term Biological Process</b> | GO:0097049 | motor neuron apoptotic process                                                          | 0.03568395 | FAS, FADD                                      |
| <b>GO Term Biological Process</b> | GO:0090090 | negative regulation of canonical Wnt signaling pathway                                  | 0.03626885 | PSMA3, PSMA4, PSMD11, PSMD14, CUL3, SOX9, DKK1 |
| <b>GO Term Biological Process</b> | GO:0030901 | midbrain development                                                                    | 0.03673493 | KDM7A, FGFR1, TAF1                             |
| <b>GO Term Biological Process</b> | GO:0015721 | bile acid and bile salt transport                                                       | 0.03673493 | NCOA2, ALB, NR1H4                              |
| <b>GO Term Biological Process</b> | GO:0045861 | negative regulation of proteolysis                                                      | 0.03673493 | CLN3, NR1H3, IDE                               |
| <b>GO Term Molecular Function</b> | GO:0019902 | phosphatase binding                                                                     | 0.0370441  | SMAD2, DLG1, CSRNP2, MAPK3                     |
| <b>GO Term Biological Process</b> | GO:0051436 | negative regulation of ubiquitin-protein ligase activity involved in mitotic cell cycle | 0.03724546 | PSMA3, PSMA4, PSMD11, PSMD14, UBE2D1           |

|                                           |            |                                                                 |            |                                               |
|-------------------------------------------|------------|-----------------------------------------------------------------|------------|-----------------------------------------------|
| <b>GO Term<br/>Biological<br/>Process</b> | GO:0008286 | insulin receptor signaling pathway                              | 0.03724546 | SREBF1, IRS1, INSR, IDE, BCAR1                |
| <b>GO Term<br/>Cellular<br/>Component</b> | GO:0031594 | neuromuscular junction                                          | 0.03774518 | DLG1, PRKAR1A, PSEN1, UTRN                    |
| <b>KEGG<br/>Pathway</b>                   | hsa04115   | p53 signaling pathway                                           | 0.03788823 | CASP9, CDK6, CDKN2A, CHEK2, SERPINE1, FAS     |
| <b>KEGG<br/>Pathway</b>                   | hsa04621   | NOD-like receptor signaling pathway                             | 0.0383861  | CHUK, TRAF6, MAP3K7, BIRC3, MAPK3             |
| <b>GO Term<br/>Molecular<br/>Function</b> | GO:0030332 | cyclin binding                                                  | 0.03898526 | CDK6, CUL3, CDK12                             |
| <b>GO Term<br/>Biological<br/>Process</b> | GO:0008630 | intrinsic apoptotic signaling pathway in response to DNA damage | 0.03950291 | CASP9, CHEK2, HTRA2, MCL1                     |
| <b>GO Term<br/>Biological<br/>Process</b> | GO:0016569 | covalent chromatin modification                                 | 0.03960883 | BRD3, RB1, RBL2, PBRM1, RBL1, BPTF            |
| <b>GO Term<br/>Biological<br/>Process</b> | GO:0042127 | regulation of cell proliferation                                | 0.03968142 | ESRRA, RNF126, CDKN1B, FAS, E2F4, SOX9, NDRG1 |
| <b>GO Term<br/>Biological<br/>Process</b> | GO:0007420 | brain development                                               | 0.03968142 | MED1, ID1, CD9, FAS, BRCA2, NES, BPTF         |
| <b>GO Term<br/>Cellular<br/>Component</b> | GO:0005901 | caveola                                                         | 0.04000754 | CLN3, IRS1, INSR, MAPK3                       |

|                                           |            |                                                                      |            |                                                                          |
|-------------------------------------------|------------|----------------------------------------------------------------------|------------|--------------------------------------------------------------------------|
| <b>GO Term<br/>Cellular<br/>Component</b> | GO:0016607 | nuclear speck                                                        | 0.0407748  | APEX1, SETD1B, METTL3, SRSF1,<br>WAC, AGGF1, CDK12, GLIS2                |
| <b>GO Term<br/>Biological<br/>Process</b> | GO:0045930 | negative regulation of mitotic cell<br>cycle                         | 0.04084626 | DLG1, CDKN1B, NKX3-1                                                     |
| <b>KEGG<br/>Pathway</b>                   | hsa04015   | Rap1 signaling pathway                                               | 0.04094735 | PRKCI, PLCB3, INSR, ID1, PIK3CB,<br>PFN1, BCAR1, FGFR1, MAP2K6,<br>MAPK3 |
| <b>GO Term<br/>Biological<br/>Process</b> | GO:1900034 | regulation of cellular response to<br>heat                           | 0.04243812 | RPTOR, HSPA8, NUP210, CCAR2,<br>MAPK3                                    |
| <b>KEGG<br/>Pathway</b>                   | hsa04932   | Non-alcoholic fatty liver disease<br>(NAFLD)                         | 0.04318813 | SREBF1, MLXIPL, IRS1, INSR, EIF2AK3,<br>FAS, NR1H3, SDHC, PIK3CB         |
| <b>GO Term<br/>Biological<br/>Process</b> | GO:0016477 | cell migration                                                       | 0.04329173 | PRKCI, GOLPH3, CUL3, SDC1, PIK3CB,<br>BCAR1, FGFR1                       |
| <b>GO Term<br/>Biological<br/>Process</b> | GO:0070936 | protein K48-linked ubiquitination                                    | 0.04440963 | RNF126, UBE2D1, UBE2A, UBE2G2                                            |
| <b>GO Term<br/>Biological<br/>Process</b> | GO:0014068 | positive regulation of<br>phosphatidylinositol 3-kinase<br>signaling | 0.04440963 | CAT, SOX9, FGFR1, NKX3-1                                                 |
| <b>GO Term<br/>Biological<br/>Process</b> | GO:0008637 | apoptotic mitochondrial changes                                      | 0.0451217  | CDKN2A, HK2, MCL1                                                        |

|                                   |            |                                           |            |                                                       |
|-----------------------------------|------------|-------------------------------------------|------------|-------------------------------------------------------|
| <b>GO Term Biological Process</b> | GO:0008015 | blood circulation                         | 0.0451217  | EPO, MTHFR, E2F4                                      |
| <b>GO Term Biological Process</b> | GO:0016055 | Wnt signaling pathway                     | 0.04580966 | MACF1, TCF7L1, CUL3, CUL1, VPS26A, FERMT2, CCAR2      |
| <b>GO Term Cellular Component</b> | GO:0005770 | late endosome                             | 0.04595512 | BACE1, HSPA8, CLN3, PIK3C3, IGF2R, MAPK3              |
| <b>GO Term Biological Process</b> | GO:0010468 | regulation of gene expression             | 0.04611564 | CLN3, CDK6, SORT1, MYC, DNMT3A                        |
| <b>GO Term Biological Process</b> | GO:0010467 | gene expression                           | 0.04697147 | GOLPH3, METTL3, IGF2BP1, FAS                          |
| <b>GO Term Molecular Function</b> | GO:0005164 | tumor necrosis factor receptor binding    | 0.04732389 | TRAF6, TRADD, FADD                                    |
| <b>GO Term Cellular Component</b> | GO:0005769 | early endosome                            | 0.04770735 | CLN3, SORT1, VPS41, VPS26A, SORL1, IGF2R, MAPK3, ARF6 |
| <b>KEGG Pathway</b>               | hsa04960   | Aldosterone-regulated sodium reabsorption | 0.04810584 | IRS1, INSR, PIK3CB, MAPK3                             |
| <b>GO Term Biological Process</b> | GO:0002088 | lens development in camera-type eye       | 0.04955405 | MED1, DLG1, PAX6                                      |
| <b>GO Term Biological Process</b> | GO:0090398 | cellular senescence                       | 0.04955405 | CDKN2A, H2AFX, PRKCD                                  |

|  |                                           |            |                                                                                     |            |                              |
|--|-------------------------------------------|------------|-------------------------------------------------------------------------------------|------------|------------------------------|
|  | <b>GO Term<br/>Biological<br/>Process</b> | GO:0002053 | positive regulation of<br>mesenchymal cell proliferation                            | 0.04955405 | MYC, SOX9, FGFR1             |
|  | <b>GO Term<br/>Biological<br/>Process</b> | GO:0000083 | regulation of transcription<br>involved in G1/S transition of<br>mitotic cell cycle | 0.04955405 | RB1, GFI1, E2F4              |
|  | <b>GO Term<br/>Biological<br/>Process</b> | GO:0010212 | response to ionizing radiation                                                      | 0.0496047  | STK11, H2AFX, DNMT3A, TOPBP1 |

|   |                                  |            |                     |          |                                                                                                                                                                                                                                                                                                                                                                                                                 |
|---|----------------------------------|------------|---------------------|----------|-----------------------------------------------------------------------------------------------------------------------------------------------------------------------------------------------------------------------------------------------------------------------------------------------------------------------------------------------------------------------------------------------------------------|
| 3 | GO Term<br>Molecular<br>Function | GO:0044822 | poly(A) RNA binding | 1.17E-11 | RBM27, DQX1, RTCA, EIF4A3, PPAN, MKI67, RBM7, SUPT16H, AQR, NCOA5, IMP3, DDX55, NGDN, DDX10, PATL1, RPP25L, DHX40, ZC3H11A, CCDC86, RPL27, SNRPA1, HNRNPH3, EIF1B, DDX28, SF3B6, NIP7, ZCCHC9, DDX23, NOL7, NOLC1, RPF1, ZFP36L1, RRP7A, REPIN1, RPS15A, DHX32, DHX35, RRS1, CFAP20, RBM10, TRMT10C, PTC2, SSB, MYEF2, NIFK, CCDC137, HELZ, RRP1B, BYSL, NUDT21, HNRNPM, PAN3, PRKRA, TSR1, ESF1, RNPS1, TARDBP |
|---|----------------------------------|------------|---------------------|----------|-----------------------------------------------------------------------------------------------------------------------------------------------------------------------------------------------------------------------------------------------------------------------------------------------------------------------------------------------------------------------------------------------------------------|

|  |                                           |            |                 |          |                                                                                                                                                                                                                                                                                             |
|--|-------------------------------------------|------------|-----------------|----------|---------------------------------------------------------------------------------------------------------------------------------------------------------------------------------------------------------------------------------------------------------------------------------------------|
|  | <b>GO Term<br/>Cellular<br/>Component</b> | GO:0005730 | nucleolus       | 1.90E-08 | MUS81, DDX28, RPL34, GEMIN2, NIP7, DDX23, ZCCHC9, NOL7, PPAN, NOLC1, MKI67, RPF1, PHF8, SMG6, COIL, ZNRD1, RRS1, SNRPB2, NUDT16, RPP14, EXOSC2, MDN1, BCAS2, UTP14C, NIFK, METTL1, CCDC137, IMP3, NGDN, APEX2, RRP1B, GTF2H5, BYSL, DHX40, RCL1, HNRNPM, POLR1A, TSR1, CCDC86, ESF1, POLR3K |
|  | <b>GO Term<br/>Biological<br/>Process</b> | GO:0006364 | rRNA processing | 4.39E-07 | IMP3, RPL34, POP4, EIF4A3, NOLC1, RRP1B, GTF2H5, BYSL, RRP7A, RCL1, RPS15A, TSR1, CCDC86, RPL27, RPP14, EXOSC2, MDN1, UTP14C                                                                                                                                                                |

|  |                                           |            |                                     |          |                                                                                                                                                                                      |
|--|-------------------------------------------|------------|-------------------------------------|----------|--------------------------------------------------------------------------------------------------------------------------------------------------------------------------------------|
|  | <b>GO Term<br/>Molecular<br/>Function</b> | GO:0004004 | ATP-dependent RNA helicase activity | 2.31E-06 | DHX40, DDX28, DDX59, DHX32, DDX55, DHX35, DQX1, DDX23, EIF4A3, DDX10                                                                                                                 |
|  | <b>GO Term<br/>Biological<br/>Process</b> | GO:0000398 | mRNA splicing, via spliceosome      | 2.97E-06 | AQR, DQX1, SF3B6, DDX23, EIF4A3, NUDT21, HNRNPM, DHX32, DHX35, RBM41, PPIH, SNRPA1, SNRPB2, RNPS1, SNRPF, HNRNPH3, BCAS2                                                             |
|  | <b>GO Term<br/>Molecular<br/>Function</b> | GO:0003723 | RNA binding                         | 5.27E-06 | RPL34, POP4, RTCA, NIP7, SRBD1, RPF1, RPS15A, EIF2D, RPP14, EXOSC2, DDX59, SSB, NIFK, DDX55, DDX10, UPF3A, PUS7L, PATL1, RCL1, NUDT21, HNRNPM, RBMXL1, RNPS1, SNRPF, HNRNPH3, TARDBP |
|  | <b>KEGG<br/>Pathway</b>                   | hsa03040   | Spliceosome                         | 6.45E-06 | HNRNPM, AQR, RBMXL1, SF3B6, DDX23, EIF4A3, PPIH, SNRPA1, SNRPB2, SNRPF, BCAS2                                                                                                        |



|  |                                           |            |                                         |          |                                                                                     |
|--|-------------------------------------------|------------|-----------------------------------------|----------|-------------------------------------------------------------------------------------|
|  | <b>GO Term<br/>Cellular<br/>Component</b> | GO:0030687 | preribosome, large subunit<br>precursor | 7.43E-06 | NIP7, PPAN, RRS1, CCDC86, RRP1B,<br>MDN1, RPF1                                      |
|  | <b>GO Term<br/>Cellular<br/>Component</b> | GO:0005681 | spliceosomal complex                    | 1.24E-05 | HNRNPM, AQR, DHX32, GEMIN2,<br>DQX1, PPIH, SNRPA1, SNRPB2,<br>HNRNPH3, SNRPF, BCAS2 |

|  |                                  |            |             |          |                                                                                                                                                                                                                                                                                                                                                                                                                                                                                                                                                                                                                                                    |
|--|----------------------------------|------------|-------------|----------|----------------------------------------------------------------------------------------------------------------------------------------------------------------------------------------------------------------------------------------------------------------------------------------------------------------------------------------------------------------------------------------------------------------------------------------------------------------------------------------------------------------------------------------------------------------------------------------------------------------------------------------------------|
|  | GO Term<br>Cellular<br>Component | GO:0005654 | nucleoplasm | 1.25E-05 | MUS81, ATF1, GMEB2, DYRK2,<br>ZBTB25, POP4, GEMIN2, RTCA,<br>EIF4A3, PHF8, ALKBH3, COIL,<br>ZMYM1, ZNRD1, ZMYM4, NUDT16,<br>RBM7, BCAS2, PRMT6, TIPIN,<br>SUPT16H, AQR, METTL1, IMP3, NAV2,<br>SENP2, POLR1A, ZC3H11A, PPIH,<br>SNRPA1, SNRPF, HNRNPH3, BCORL1,<br>ZFPM1, CGGBP1, PSMD10, GTF3C2,<br>PAXIP1, SF3B6, DDX23, NOLC1,<br>RRP7A, RPS15A, TAF1B, SNRPB2,<br>RPRD1B, RPP14, CFAP20, EXOSC2,<br>ZBED5, RBM10, NR2C2AP, ZNF143,<br>TRMT10C, PPIL2, MYEF2, BRF2, NIFK,<br>UPF3A, GTF2H5, CLK2, BYSL, RCL1,<br>NUDT21, HNRNPM, POLR3A, ERCC4,<br>PRKRA, RFWD3, GID8, TSR1,<br>RANGRF, ESF1, RNPS1, POLR3H,<br>TARDBP, POLR3K, SLC2A4RG, NOP10 |
|--|----------------------------------|------------|-------------|----------|----------------------------------------------------------------------------------------------------------------------------------------------------------------------------------------------------------------------------------------------------------------------------------------------------------------------------------------------------------------------------------------------------------------------------------------------------------------------------------------------------------------------------------------------------------------------------------------------------------------------------------------------------|

|  |                         |          |               |          |                                                                                     |
|--|-------------------------|----------|---------------|----------|-------------------------------------------------------------------------------------|
|  | <b>KEGG<br/>Pathway</b> | hsa03013 | RNA transport | 2.85E-05 | POP4, GEMIN2, EIF3J, EIF4A3, UPF3A,<br>RNPS1, NUP54, RPP14, SENP2, EIF1B,<br>RPP25L |
|--|-------------------------|----------|---------------|----------|-------------------------------------------------------------------------------------|

|  |                                  |            |         |          |                                                                                                                                                                                                                                                                                                                                                                                                                                                                                                                                                                                                                                                                                                                                                                                                                                                                               |
|--|----------------------------------|------------|---------|----------|-------------------------------------------------------------------------------------------------------------------------------------------------------------------------------------------------------------------------------------------------------------------------------------------------------------------------------------------------------------------------------------------------------------------------------------------------------------------------------------------------------------------------------------------------------------------------------------------------------------------------------------------------------------------------------------------------------------------------------------------------------------------------------------------------------------------------------------------------------------------------------|
|  | GO Term<br>Cellular<br>Component | GO:0005634 | nucleus | 3.57E-05 | <p>ATF1, ANKRD37, CCNJ, GEMIN2, RTCA, PPAN, MKI67, ALKBH6, ALKBH3, ZNF84, ZNF569, EIF2D, SLC25A42, NUDT16, ZNF445, TIPIN, SUPT16H, METTL1, IMP3, ZBTB37, PASK, RPP25L, CAMKMT, RUFY1, MTAP, RBMXL1, KATNAL1, RUFY2, ZSCAN21, CCDC86, RPL27, ZNF711, ZFPM1, CGGBP1, PSMD10, URI1, ZNF395, PAXIP1, CREBL2, RPAP1, ZFP36L1, S100A13, RRS1, ZKSCAN2, RPRD1B, RBM10, MDN1, CTC1, UPF3A, HELZ, CLK2, SMU1, PAN2, APPBP2, TDP1, SP5, RNPS1, RCOR3, DCP1A, RCOR2, SLC2A4RG, NOP10, MUS81, GMEB2, DYRK2, SETD6, JRKL, PHF8, SMG6, COIL, NUDCD1, ZNF764, RBM7, BCAS2, PRMT6, DDX59, NCOA5, CTDSPL, RIPPLY3, POLR1A, ZNF514, HNRNPH3, DDX28, DTYMK, NIP7, DDX23, NOL7, ZNF7, PRIMPOL, REPIN1, RMND5A, TAF1B, APBB2, ZNF623, RPP14, DTD1, EXOSC2, ATE1, PCGF6, SSB, MYEF2, PPIL2, APEX2, ZNF76, RRP1B, PNRC2, BYSL, NUDT21, ERCC4, RFWD3, DNAJA3, ALMS1, TSR1, RANGRF, TARDBP, ZNF696</p> |
|--|----------------------------------|------------|---------|----------|-------------------------------------------------------------------------------------------------------------------------------------------------------------------------------------------------------------------------------------------------------------------------------------------------------------------------------------------------------------------------------------------------------------------------------------------------------------------------------------------------------------------------------------------------------------------------------------------------------------------------------------------------------------------------------------------------------------------------------------------------------------------------------------------------------------------------------------------------------------------------------|

|  |                                   |            |                                      |          |                                                                                                                  |
|--|-----------------------------------|------------|--------------------------------------|----------|------------------------------------------------------------------------------------------------------------------|
|  | <b>KEGG Pathway</b>               | hsa03008   | Ribosome biogenesis in eukaryotes    | 4.01E-05 | RCL1, RRP7A, IMP3, POP4, NOP10, MDN1, RPP25L, UTP14C                                                             |
|  | <b>GO Term Cellular Component</b> | GO:0071013 | catalytic step 2 spliceosome         | 5.51E-05 | HNRNPM, AQR, DHX35, SF3B6, DDX23, EIF4A3, SNRPA1, SNRPB2, SNRPF, BCAS2                                           |
|  | <b>GO Term Molecular Function</b> | GO:0003899 | DNA-directed RNA polymerase activity | 7.80E-05 | POLR2M, ZNRD1, POLR3A, POLR1A, POLR3H, RPAP1, POLR3K                                                             |
|  | <b>KEGG Pathway</b>               | hsa00230   | Purine metabolism                    | 9.33E-05 | ZNRD1, POLR3A, NME7, POLR1A, NPR2, PDE6D, POLR3H, AK4, NUDT16, POLR3K                                            |
|  | <b>GO Term Molecular Function</b> | GO:0000166 | nucleotide binding                   | 4.90E-04 | RBM27, MYEF2, SSB, NIFK, SF3B6, UPF3A, RRP7A, HNRNPM, RBMXL1, RBM41, SNRPB2, RNPS1, HNRNPH3, RBM7, TARDBP, RBM10 |
|  | <b>GO Term Biological Process</b> | GO:0008380 | RNA splicing                         | 5.34E-04 | RBMXL1, GEMIN2, DDX23, EIF4A3, SNRPA1, RNPS1, HNRNPH3, SNRPF, TARDBP, RBM10, BCAS2                               |

|  |                                           |            |                                            |          |                                                                                                                                                                                                                                                           |
|--|-------------------------------------------|------------|--------------------------------------------|----------|-----------------------------------------------------------------------------------------------------------------------------------------------------------------------------------------------------------------------------------------------------------|
|  | <b>GO Term<br/>Biological<br/>Process</b> | GO:0006397 | mRNA processing                            | 5.34E-04 | PAN2, RBM27, NUDT21, PTCD2,<br>RBMXL1, PAN3, GEMIN2, TARDBP,<br>RBM10, BCAS2, ZFP36L1                                                                                                                                                                     |
|  | <b>GO Term<br/>Cellular<br/>Component</b> | GO:0030529 | intracellular ribonucleoprotein<br>complex | 6.00E-04 | HNRNPM, RBMXL1, SSB, DYRK2,<br>EIF4A3, SNRPA1, SNRPB2, RPL27,<br>HNRNPH3, ZFP36L1                                                                                                                                                                         |
|  | <b>KEGG<br/>Pathway</b>                   | hsa03020   | RNA polymerase                             | 6.78E-04 | ZNRD1, POLR3A, POLR1A, POLR3H,<br>POLR3K                                                                                                                                                                                                                  |
|  | <b>GO Term<br/>Molecular<br/>Function</b> | GO:0003676 | nucleic acid binding                       | 8.62E-04 | DDX23, ZCCHC9, EIF4A3, ZNF7,<br>REPIN1, ZMYM1, ZNRD1, DHX35,<br>ZNF84, ZNF569, ZNF623, RBM7,<br>ZNF764, ZNF445, RBM10, ZNF143,<br>DDX59, MYEF2, NIFK, DDX55, ZBTB37,<br>ZNF76, PAN2, DHX40, ZSCAN21,<br>ZNF514, RNPS1, HNRNPH3, TARDBP,<br>POLR3K, ZNF696 |

|                                   |            |                                                                     |            |                                                                |
|-----------------------------------|------------|---------------------------------------------------------------------|------------|----------------------------------------------------------------|
| <b>GO Term Biological Process</b> | GO:0010501 | RNA secondary structure unwinding                                   | 8.98E-04   | DDX28, DDX59, DDX55, DDX23, EIF4A3, DDX10                      |
| <b>GO Term Biological Process</b> | GO:0006139 | nucleobase-containing compound metabolic process                    | 0.00113234 | SLC23A2, MTAP, ZNRD1, SRBD1, POLR3H, AK4                       |
| <b>GO Term Molecular Function</b> | GO:0004386 | helicase activity                                                   | 0.0011929  | DHX40, DHX32, DDX55, DDX23, EIF4A3, DDX10, HELZ, NAV2          |
| <b>KEGG Pathway</b>               | hsa00240   | Pyrimidine metabolism                                               | 0.00133878 | DTYMK, ZNRD1, POLR3A, NME7, POLR1A, POLR3H, POLR3K             |
| <b>GO Term Biological Process</b> | GO:0000184 | nuclear-transcribed mRNA catabolic process, nonsense-mediated decay | 0.00152671 | RPS15A, RPL34, EIF4A3, UPF3A, RNPS1, RPL27, DCP1A, SMG6, PNRC2 |
| <b>GO Term Cellular Component</b> | GO:0019013 | viral nucleocapsid                                                  | 0.00185693 | HNRNPM, SNRPA1, SNRPB2, HNRNPH3, UTP14C                        |
| <b>KEGG Pathway</b>               | hsa03018   | RNA degradation                                                     | 0.00253956 | PAN2, PAN3, NUDT16, DCP1A, EXOSC2, PATL1                       |
| <b>GO Term Biological Process</b> | GO:0006383 | transcription from RNA polymerase III promoter                      | 0.00327865 | GTF3C2, ZNF143, POLR3A, POLR3H, POLR3K                         |

|  |                                           |            |                                                                     |            |                                             |
|--|-------------------------------------------|------------|---------------------------------------------------------------------|------------|---------------------------------------------|
|  | <b>GO Term<br/>Cellular<br/>Component</b> | GO:0035145 | exon-exon junction complex                                          | 0.00789149 | EIF4A3, UPF3A, RNPS1, SMG6                  |
|  | <b>GO Term<br/>Biological<br/>Process</b> | GO:0006264 | mitochondrial DNA replication                                       | 0.01241257 | DNAJA3, C10ORF2, PRIMPOL                    |
|  | <b>GO Term<br/>Biological<br/>Process</b> | GO:0000290 | deadenylation-dependent<br>decapping of nuclear-transcribed<br>mRNA | 0.01241257 | PAN3, DCP1A, PATL1                          |
|  | <b>GO Term<br/>Cellular<br/>Component</b> | GO:0000932 | cytoplasmic mRNA processing<br>body                                 | 0.01408671 | PAN2, PAN3, DCP1A, PATL1,<br>ZFP36L1, PNRC2 |



|  |                                  |            |                                                            |            |                                                                                                                                                                                                                                                                                                                                                                |
|--|----------------------------------|------------|------------------------------------------------------------|------------|----------------------------------------------------------------------------------------------------------------------------------------------------------------------------------------------------------------------------------------------------------------------------------------------------------------------------------------------------------------|
|  | GO Term<br>Biological<br>Process | GO:0006351 | transcription, DNA-templated                               | 0.01625527 | KANK2, GTF3C2, URI1, ZNF395,<br>PAXIP1, ZBTB25, ZCCHC9, CREBL2,<br>ZNF7, PHF8, ZNRD1, TAF1B, ZNF84,<br>ZKSCAN2, ZNF569, ZNF623, ZNF764,<br>ZNF445, PRMT6, PCGF6, MYEF2,<br>NCOA5, ZBTB37, ZNF76, PNRC2,<br>RIPPLY3, POLR3A, POLR1A,<br>ZSCAN21, SP5, ZNF514, ESF1, ZNF711,<br>RNPS1, POLR3H, RCOR3, BCORL1,<br>ZFPM1, RCOR2, ZNF696, FRYL,<br>SLC2A4RG, CGGBP1 |
|  | GO Term<br>Biological<br>Process | GO:0006362 | transcription elongation from RNA<br>polymerase I promoter | 0.01666432 | ZNRD1, TAF1B, POLR1A, GTF2H5                                                                                                                                                                                                                                                                                                                                   |

|  |                                           |            |                                               |            |                                                                                                                                                                                                                                                                                                      |
|--|-------------------------------------------|------------|-----------------------------------------------|------------|------------------------------------------------------------------------------------------------------------------------------------------------------------------------------------------------------------------------------------------------------------------------------------------------------|
|  | <b>GO Term<br/>Molecular<br/>Function</b> | GO:0003677 | DNA binding                                   | 0.01754684 | MUS81, GTF3C2, ZNF395, GMEB2, ZBTB25, JRKL, MKI67, RPAP1, ZNF7, ZFP36L1, REPIN1, ZMYM1, ZMYM4, ZNF84, ZKSCAN2, ZNF569, ZNF623, TRIM26, ZNF764, ZNF445, DTD1, ZBED5, ZNF143, PCGF6, TIPIN, MYEF2, ZBTB37, ZNF76, APEX2, POLR3A, ERCC4, POLR1A, ZNF514, ZNF711, POLR3H, RCOR3, RCOR2, ZNF696, SLC2A4RG |
|  | <b>GO Term<br/>Biological<br/>Process</b> | GO:0006363 | termination of RNA polymerase I transcription | 0.01832562 | ZNRD1, TAF1B, POLR1A, GTF2H5                                                                                                                                                                                                                                                                         |
|  | <b>GO Term<br/>Molecular<br/>Function</b> | GO:0003729 | mRNA binding                                  | 0.01939812 | NUDT21, SSB, EIF4A3, TDRD7, NUDT16, DCP1A, ZFP36L1                                                                                                                                                                                                                                                   |
|  | <b>KEGG<br/>Pathway</b>                   | hsa03015   | mRNA surveillance pathway                     | 0.01983604 | NUDT21, EIF4A3, UPF3A, RNPS1, SMG6                                                                                                                                                                                                                                                                   |

|                                   |            |                                                              |            |                                        |
|-----------------------------------|------------|--------------------------------------------------------------|------------|----------------------------------------|
| <b>GO Term Biological Process</b> | GO:0006359 | regulation of transcription from RNA polymerase III promoter | 0.02190012 | ZNF143, BRF2, ZNF76                    |
| <b>GO Term Biological Process</b> | GO:0006361 | transcription initiation from RNA polymerase I promoter      | 0.02191451 | ZNRD1, TAF1B, POLR1A, GTF2H5           |
| <b>GO Term Biological Process</b> | GO:0042254 | ribosome biogenesis                                          | 0.02585911 | RCL1, MTG1, RPL34, TSR1                |
| <b>GO Term Biological Process</b> | GO:0006396 | RNA processing                                               | 0.02726236 | DHX40, RCL1, SSB, DHX35, RTCA, HNRNPH3 |
| <b>GO Term Biological Process</b> | GO:0006369 | termination of RNA polymerase II transcription               | 0.03078621 | NUDT21, ZC3H11A, EIF4A3, RNPS1, SNRPF  |
| <b>GO Term Molecular Function</b> | GO:0004521 | endoribonuclease activity                                    | 0.03640158 | RCL1, PLD6, SMG6                       |
| <b>GO Term Biological Process</b> | GO:0014070 | response to organic cyclic compound                          | 0.03726759 | ATF1, FNTB, EIF4A3, MKI67              |
| <b>GO Term Cellular Component</b> | GO:0031251 | PAN complex                                                  | 0.0393125  | PAN2, PAN3                             |
| <b>GO Term Molecular Function</b> | GO:0003963 | RNA-3'-phosphate cyclase activity                            | 0.04030276 | RCL1, RTCA                             |
| <b>GO Term Biological Process</b> | GO:0010923 | negative regulation of phosphatase activity                  | 0.04795323 | URI1, NIFK, ZCCHC9, RRP1B              |

|   |                                           |            |                                         |            |                                                                                                                                                                                                             |
|---|-------------------------------------------|------------|-----------------------------------------|------------|-------------------------------------------------------------------------------------------------------------------------------------------------------------------------------------------------------------|
|   | <b>GO Term<br/>Cellular<br/>Component</b> | GO:0005666 | DNA-directed RNA polymerase III complex | 0.04873867 | POLR3A, POLR3H, POLR3K                                                                                                                                                                                      |
| 4 | <b>GO Term<br/>Biological<br/>Process</b> | GO:0007165 | signal transduction                     | 8.40E-05   | CDS1, BCAR3, INPP1, NEDD9, IQGAP2, RASSF3, IMPA1, HIVEP2, NDFIP2, NDFIP1, DAPK1, CCL20, FST, ANXA4, RASSF8, ANK2, IRAK4, ACVR2B, MYO9A, TNFRSF10D, INPP4A, TOM1L1, CLDN4, TRAF4, TOLLIP, SMOC1, GNB2, PGAM5 |

|  |                                           |            |                                    |          |                                                                                                                                                                                                                                             |
|--|-------------------------------------------|------------|------------------------------------|----------|---------------------------------------------------------------------------------------------------------------------------------------------------------------------------------------------------------------------------------------------|
|  | <b>GO Term<br/>Cellular<br/>Component</b> | GO:0005622 | intracellular                      | 1.17E-04 | BCAR3, CLIC4, TRAF3IP2, POGK, AGAP1, TWF1, CAPN7, GOLGA1, COTL1, ZNF268, SOCS7, ZNF101, DFFB, RPH3AL, ZNF480, CCL20, TBC1D8, SERPINB9, ANK2, IRAK4, MYO9A, RAP2C, TOM1L1, TRAF4, RAB18, RUNDC1, TRIM38, RAPGEF5, TRIM32, SGK2, SOS2, ZNF772 |
|  | <b>GO Term<br/>Cellular<br/>Component</b> | GO:0005923 | bicellular tight junction          | 6.06E-04 | RAP2C, CLDN4, TRAF4, WNK4, ESAM, F11R, MPDZ, TJP3                                                                                                                                                                                           |
|  | <b>GO Term<br/>Cellular<br/>Component</b> | GO:0031463 | Cul3-RING ubiquitin ligase complex | 7.07E-04 | KLHL18, KLHL36, KCTD10, KLHL2, KCTD17, KCTD5                                                                                                                                                                                                |

|  |                                  |            |                                       |            |                                                                                                                                                                                                                                                                                                                                                                                                        |
|--|----------------------------------|------------|---------------------------------------|------------|--------------------------------------------------------------------------------------------------------------------------------------------------------------------------------------------------------------------------------------------------------------------------------------------------------------------------------------------------------------------------------------------------------|
|  | GO Term<br>Cellular<br>Component | GO:0005886 | plasma membrane                       | 0.00126123 | LMBR1L, CLIC4, SLC44A1, RAB3D, ITGB2, ANTXR2, F11R, PTPRF, LTB4R, PPP1R9B, RASSF3, SLC39A6, FAM21A, PTGFRN, ZHX2, DAPK1, ANXA4, ITGA2, LIFR, ANK2, IRAK4, PHKA2, IL17RB, RAP2C, CLDN4, TRAF4, CD46, MTMR1, SNAP47, TTYH3, ARHGEF25, MAPKAP1, EFNA4, ADD1, GRK5, GNG4, GNA12, FNIP2, SOCS7, GPR157, SLC12A2, RPH3AL, ATP2B4, ACVR2B, TNFRSF10D, IL22RA1, TSPAN14, GNB2, RAB18, ESAM, TAB2, TJP3, BMPR1A |
|  | KEGG<br>Pathway                  | hsa04070   | Phosphatidylinositol signaling system | 0.00185515 | CDS1, INPP4A, PI4K2B, MTMR1, IMPA1, INPP1, IPMK                                                                                                                                                                                                                                                                                                                                                        |

|                                           |            |                                                               |            |                                                                                                              |
|-------------------------------------------|------------|---------------------------------------------------------------|------------|--------------------------------------------------------------------------------------------------------------|
| <b>GO Term<br/>Cellular<br/>Component</b> | GO:0009897 | external side of plasma membrane                              | 0.00261591 | TGFBR3, ENOX2, ITGA2, CTSV,<br>ANTXR2, BMPR1A, CD276                                                         |
| <b>GO Term<br/>Cellular<br/>Component</b> | GO:0000421 | autophagosome membrane                                        | 0.00298956 | ATG16L1, WIPI1, ATG14, TECPR1                                                                                |
| <b>KEGG<br/>Pathway</b>                   | hsa00562   | Inositol phosphate metabolism                                 | 0.00299647 | INPP4A, PI4K2B, MTMR1, IMPA1,<br>INPP1, IPMK                                                                 |
| <b>GO Term<br/>Cellular<br/>Component</b> | GO:0009986 | cell surface                                                  | 0.00412544 | CLIC4, ANXA4, ITGA2, ITGB2,<br>IQGAP2, SYNJ2BP, IL17RB, DCBLD2,<br>TGFBR3, TSPAN14, SLC39A6, PTGFRN,<br>CD46 |
| <b>GO Term<br/>Biological<br/>Process</b> | GO:0001654 | eye development                                               | 0.0051309  | FOXC1, SMOC1, BLOC1S3, RAB18                                                                                 |
| <b>GO Term<br/>Biological<br/>Process</b> | GO:0001974 | blood vessel remodeling                                       | 0.00583102 | FOXC1, NOL3, ACVR2B, AGT                                                                                     |
| <b>GO Term<br/>Biological<br/>Process</b> | GO:0043123 | positive regulation of I-kappaB<br>kinase/NF-kappaB signaling | 0.00586131 | NDFIP2, NDFIP1, TRAF3IP2, CASP10,<br>TAB2, TRIM38, IRAK4, TRIM32                                             |

|                                           |            |                                              |            |                                                                                                                              |
|-------------------------------------------|------------|----------------------------------------------|------------|------------------------------------------------------------------------------------------------------------------------------|
| <b>GO Term<br/>Biological<br/>Process</b> | GO:0042981 | regulation of apoptotic process              | 0.00600241 | BNIP3L, STEAP3, RASSF3, TRAF4,<br>CASP10, DAPK1, NOL3, SGK2,<br>TNFRSF10D                                                    |
| <b>KEGG<br/>Pathway</b>                   | hsa04060   | Cytokine-cytokine receptor<br>interaction    | 0.00658788 | IL22RA1, CCL20, LIFR, ACVR2B,<br>IL17RB, BMPR1A, TNFRSF10D                                                                   |
| <b>GO Term<br/>Biological<br/>Process</b> | GO:0043547 | positive regulation of GTPase<br>activity    | 0.00789689 | BCAR3, RGS19, ARHGEF25, CCL20,<br>ARHGEF19, AGAP1, ARHGEF10L,<br>F11R, MYO9A, RGP1, HERC1, PGAM5,<br>RAPGEF5, ARHGEF40, SOS2 |
| <b>GO Term<br/>Biological<br/>Process</b> | GO:0006661 | phosphatidylinositol biosynthetic<br>process | 0.0079989  | CDS1, INPP4A, PI4K2B, MTMR1,<br>IMPA1                                                                                        |
| <b>GO Term<br/>Molecular<br/>Function</b> | GO:0048185 | activin binding                              | 0.00852788 | TGFBR3, FST, ACVR2B                                                                                                          |
| <b>KEGG<br/>Pathway</b>                   | hsa04514   | Cell adhesion molecules (CAMs)               | 0.0087646  | CLDN4, ITGB2, ESAM, F11R, PTPRF,<br>CD276                                                                                    |
| <b>GO Term<br/>Molecular<br/>Function</b> | GO:0032403 | protein complex binding                      | 0.01005956 | ITGA2, GNB2, ITGB2, TWF1, PGAM5,<br>CTSV, KCTD17, KCTD5, PTPRF                                                               |



|  |                                           |            |                                                   |            |                                                               |
|--|-------------------------------------------|------------|---------------------------------------------------|------------|---------------------------------------------------------------|
|  | <b>GO Term<br/>Molecular<br/>Function</b> | GO:0004871 | signal transducer activity                        | 0.01447995 | NDFIP2, NDFIP1, GNG4, FST, TOLLIP,<br>GNB2, GNA12, TRIM38     |
|  | <b>GO Term<br/>Molecular<br/>Function</b> | GO:0005089 | Rho guanyl-nucleotide exchange<br>factor activity | 0.01635439 | ARHGEF25, ARHGEF19, ARHGEF10L,<br>ARHGEF40, SOS2              |
|  | <b>GO Term<br/>Biological<br/>Process</b> | GO:0019221 | cytokine-mediated signaling<br>pathway            | 0.01889625 | IL22RA1, LIFR, IRAK4, SOCS7, IL17RB                           |
|  | <b>GO Term<br/>Biological<br/>Process</b> | GO:0030308 | negative regulation of cell growth                | 0.01895537 | SERPINE2, GNG4, SH3BP4, AGT,<br>DCBLD2, PPP1R9B               |
|  | <b>GO Term<br/>Molecular<br/>Function</b> | GO:0008157 | protein phosphatase 1 binding                     | 0.02045439 | AKAP11, SHOC2, PPP1R9B                                        |
|  | <b>GO Term<br/>Biological<br/>Process</b> | GO:0035023 | regulation of Rho protein signal<br>transduction  | 0.02095275 | ARHGEF25, ARHGEF19, ARHGEF10L,<br>ARHGEF40, SOS2              |
|  | <b>GO Term<br/>Cellular<br/>Component</b> | GO:0034045 | pre-autophagosomal structure<br>membrane          | 0.02213296 | ATG16L1, WIPI1, ATG14                                         |
|  | <b>GO Term<br/>Cellular<br/>Component</b> | GO:0015629 | actin cytoskeleton                                | 0.02563809 | CLIC4, DAPK1, ARPC1B, KLHL2,<br>TWF1, IQGAP2, ZNF268, PPP1R9B |

|                                           |            |                                            |            |                                                                            |
|-------------------------------------------|------------|--------------------------------------------|------------|----------------------------------------------------------------------------|
| <b>GO Term<br/>Biological<br/>Process</b> | GO:0043647 | inositol phosphate metabolic process       | 0.02663284 | INPP4A, IMPA1, INPP1, IPMK                                                 |
| <b>GO Term<br/>Cellular<br/>Component</b> | GO:0010008 | endosome membrane                          | 0.03235503 | TOM1L1, STEAP3, NDFIP1, WIPI1, TAB2, IRAK4, ANTXR2                         |
| <b>GO Term<br/>Cellular<br/>Component</b> | GO:0005834 | heterotrimeric G-protein complex           | 0.03807341 | RGS19, GNG4, GNA12                                                         |
| <b>GO Term<br/>Molecular<br/>Function</b> | GO:0030742 | GTP-dependent protein binding              | 0.04011866 | RAB3D, HPS6, RAPGEF5                                                       |
| <b>GO Term<br/>Biological<br/>Process</b> | GO:0006821 | chloride transport                         | 0.04094232 | CLIC4, TTYH3, WNK4                                                         |
| <b>GO Term<br/>Biological<br/>Process</b> | GO:0007264 | small GTPase mediated signal transduction  | 0.04460741 | RAP2C, BCAR3, RGS19, RAB3D, RAB18, AGAP1, RAPGEF5, SOS2                    |
| <b>GO Term<br/>Biological<br/>Process</b> | GO:0035556 | intracellular signal transduction          | 0.04475663 | TGFBR3, AKAP11, TRAF3IP2, DAPK1, TOLLIP, WNK4, RAPGEF5, SOCS7, MYO9A, SGK2 |
| <b>GO Term<br/>Biological<br/>Process</b> | GO:0030501 | positive regulation of bone mineralization | 0.04478003 | ACVR2B, BMPR1A, CD276                                                      |
| <b>GO Term<br/>Biological<br/>Process</b> | GO:0043086 | negative regulation of catalytic activity  | 0.04703281 | ANXA4, CD46, FNIP2, PPP1R9B                                                |

|   |                                           |            |                                                 |            |                                                                                                                                                                                                                                                                                                                         |
|---|-------------------------------------------|------------|-------------------------------------------------|------------|-------------------------------------------------------------------------------------------------------------------------------------------------------------------------------------------------------------------------------------------------------------------------------------------------------------------------|
|   | <b>GO Term<br/>Biological<br/>Process</b> | GO:0006954 | inflammatory response                           | 0.04818316 | TPST1, CCL20, TOLLIP, ITGB2, F11R,<br>LYZ, LTB4R, TNFRSF10D                                                                                                                                                                                                                                                             |
|   | <b>GO Term<br/>Biological<br/>Process</b> | GO:0007186 | G-protein coupled receptor<br>signaling pathway | 0.04896973 | RGS19, GNG4, CCL20, GNB2, GNA12,<br>AGT, LTB4R, GPR157                                                                                                                                                                                                                                                                  |
| 5 | <b>GO Term<br/>Cellular<br/>Component</b> | GO:0005789 | endoplasmic reticulum membrane                  | 2.70E-11   | LMAN2L, MGST3, XYLT2, MGST1,<br>MGST2, PANX1, ARV1, RDH10,<br>HSD17B2, MFSD3, BCAP29, PIP4K2B,<br>SDF2, LRRC8E, OSBPL8, SEC24B,<br>SEC16A, PLA2G2A, ABCC6, ALG2,<br>ACSL5, ACSL4, ELOVL6, MOGS,<br>DHCR24, DOLK, POMGNT2, DDOST,<br>EXT2, NCEH1, SOAT1, RFT1, TYRO3,<br>PREB, TMCC1, ERGIC2, UGT2B7,<br>ERGIC1, SLC27A4 |

|  |                                  |            |                                |          |                                                                                                                                                                                                                                                                                                                                                                                                                                                                                                                                                                                                                                                                             |
|--|----------------------------------|------------|--------------------------------|----------|-----------------------------------------------------------------------------------------------------------------------------------------------------------------------------------------------------------------------------------------------------------------------------------------------------------------------------------------------------------------------------------------------------------------------------------------------------------------------------------------------------------------------------------------------------------------------------------------------------------------------------------------------------------------------------|
|  | GO Term<br>Cellular<br>Component | GO:0016021 | integral component of membrane | 6.38E-09 | ABCD3, SFT2D3, GOLT1B, DENND5B, SLC35B1, MPV17L, XYLT2, NAGPA, HS6ST1, ACSM2B, TMEM187, PANX1, ARV1, ATP7B, OXER1, BCAP29, GGT1, SLC25A44, ABCD1, ABCC1, SLC30A3, SLC30A5, ABCC6, SLC39A11, ALG2, ACSL5, ACSL4, MOGS, ELOVL6, POMGNT2, POMGNT1, SLC39A14, ZDHHC17, DDOST, ATRN, CEACAM1, SOAT1, SLCO4A1, PITPNM2, TMEM5, RFT1, TYRO3, SLC29A4, PREB, CD302, ADPRM, SMIM20, ERGIC2, STEAP2, ERGIC1, UGT2B7, SLC27A4, SLC22A3, CLDND1, LMAN2L, MAOB, HEPACAM, MGST3, GLT8D1, MGST1, MGST2, LRP4, SULT1A1, RDH10, HSD17B2, LRRC8E, OSBPL8, TMEM86B, COA1, TMEM184B, SEMA4F, DHCR24, DOLK, VASN, COL1A1, CLCN6, EXT2, TSPAN13, NCEH1, OSTM1, MGAT4A, C4ORF3, CYSTM1, TMCC1, MCU |
|--|----------------------------------|------------|--------------------------------|----------|-----------------------------------------------------------------------------------------------------------------------------------------------------------------------------------------------------------------------------------------------------------------------------------------------------------------------------------------------------------------------------------------------------------------------------------------------------------------------------------------------------------------------------------------------------------------------------------------------------------------------------------------------------------------------------|

|  |                                  |            |          |          |                                                                                                                                                                                                                                                                                                                                                                                                                                                                                                  |
|--|----------------------------------|------------|----------|----------|--------------------------------------------------------------------------------------------------------------------------------------------------------------------------------------------------------------------------------------------------------------------------------------------------------------------------------------------------------------------------------------------------------------------------------------------------------------------------------------------------|
|  | GO Term<br>Cellular<br>Component | GO:0016020 | membrane | 1.60E-07 | ABCD3, SFT2D3, GOLT1B, DENND5B,<br>HEXB, XYLT2, PANX1, GOLGA3,<br>LGALS3, ATP7B, SCP2, DPYSL2,<br>PALM, BCAP29, CAPN1, PIP4K2C,<br>SDF2, ABCD1, CTSC, ABCC1, SLC30A3,<br>SLC30A5, SLC39A11, ALG2, ACSL5,<br>ACSL4, MOGS, LARP4B, DDOST, F5,<br>EML4, DNAJC3, CEACAM1, RILPL2,<br>SOAT1, DNAJB11, PREB, CD302,<br>ERGIC2, ERGIC1, UGT2B7, SLC27A4,<br>SLC22A3, LMAN2L, MGST3, GLT8D1,<br>EDEM3, OSBPL8, SEC24B, TMEM86B,<br>API5, EDEM2, SEMA4F, DHCR24,<br>GBAS, EXT2, TSPAN13, NCEH1,<br>MGAT4A |
|--|----------------------------------|------------|----------|----------|--------------------------------------------------------------------------------------------------------------------------------------------------------------------------------------------------------------------------------------------------------------------------------------------------------------------------------------------------------------------------------------------------------------------------------------------------------------------------------------------------|

|  |                         |                                               |  |          |                                                                                                                                                                                                                                                                                                             |
|--|-------------------------|-----------------------------------------------|--|----------|-------------------------------------------------------------------------------------------------------------------------------------------------------------------------------------------------------------------------------------------------------------------------------------------------------------|
|  | <b>KEGG<br/>Pathway</b> | hsa05204:Chemical<br>carcinogenesis           |  | 7.76E-07 | SULT1A1, CBR1, ADH4, MGST3,<br>GSTA1, MGST1, MGST2, ADH5,<br>UGT2B7                                                                                                                                                                                                                                         |
|  | <b>KEGG<br/>Pathway</b> | hsa00982:Drug metabolism -<br>cytochrome P450 |  | 1.39E-06 | ADH4, MAOB, MGST3, GSTA1,<br>MGST1, MGST2, ADH5, UGT2B7                                                                                                                                                                                                                                                     |
|  | <b>KEGG<br/>Pathway</b> | hsa01100:Metabolic<br>pathways                |  | 1.42E-06 | ALAS1, MAOB, GLDC, HEXB,<br>AKR1D1, XYLT2, GNS, ADH5, ACAT2,<br>PTS, ACSM2B, SGSH, GMPPB, ADH4,<br>SCP2, IMPA2, RDH10, HSD17B2, GGT1,<br>GLUL, CBR1, PLA2G12B, GK,<br>PLA2G2A, ALG2, ACSL5, ACSL4,<br>MOGS, DHCR24, DOLK, DDOST,<br>PAFAH2, AGMAT, EXT2, MINPP1,<br>BHMT, AKR1B10, ACOX2, MGAT4A,<br>UGT2B7 |

|  |                                           |                                                             |                                 |          |                                                                                                                                                                                                                                       |
|--|-------------------------------------------|-------------------------------------------------------------|---------------------------------|----------|---------------------------------------------------------------------------------------------------------------------------------------------------------------------------------------------------------------------------------------|
|  | <b>GO Term<br/>Biological<br/>Process</b> | GO:0098869                                                  | cellular oxidant detoxification | 3.06E-06 | AAED1, APOM, GPX3, MGST3, GSR,<br>GSTA1, MGST1, HP, MGST2                                                                                                                                                                             |
|  | <b>KEGG<br/>Pathway</b>                   | hsa00980:Metabolism of<br>xenobiotics by cytochrome<br>P450 |                                 | 5.97E-06 | CBR1, ADH4, MGST3, GSTA1, MGST1,<br>MGST2, ADH5, UGT2B7                                                                                                                                                                               |
|  | <b>GO Term<br/>Cellular<br/>Component</b> | GO:0005783                                                  | endoplasmic reticulum           | 1.74E-05 | GOLT1B, MGST3, MGST1, MGST2,<br>PANX1, BCAP29, EDEM3, MESDC2,<br>OSBPL8, PLA2G2A, EDEM2, ACSL5,<br>SEMA4F, ELOVL6, MOGS, DHCR24,<br>POMGNT2, DHRS1, SLC39A14,<br>DDOST, DNAJC3, EXT2, MINPP1,<br>TRAPPC6A, SOAT1, DNAJB11,<br>SLC27A4 |

|  |                                  |            |                              |          |                                                                                                                                                                                                                                                                                                                                                                                                                      |
|--|----------------------------------|------------|------------------------------|----------|----------------------------------------------------------------------------------------------------------------------------------------------------------------------------------------------------------------------------------------------------------------------------------------------------------------------------------------------------------------------------------------------------------------------|
|  | GO Term<br>Cellular<br>Component | GO:0070062 | extracellular exosome        | 2.70E-05 | HEXB, SERPINA10, HP, LIPA, SGSH, GMPPB, LGALS3, SCP2, DPYSL2, CAPN1, PIP4K2C, GGT1, GLUL, CTSC, CTSB, CBR1, ABCC1, GPX3, AHSG, LANCL1, ACSL4, MOGS, PTGR1, DNAJC3, ATRN, MINPP1, CEACAM1, RILPL2, MASP2, HAGH, UGT2B7, CFD, MAOB, SERPINC1, MGST3, AKR1D1, BPHL, GNS, ADH5, ACAT2, CPN2, CRYZ, APOM, ISOC1, GK, PLA2G2A, GSR, DHRS2, VASN, AGMAT, DERA, EXT2, TF, BHMT, AKR1B10, FABP5, MGAT4A, GLOD4, GSTA1, CYSTM1 |
|  | GO Term<br>Biological<br>Process | GO:0006805 | xenobiotic metabolic process | 3.59E-05 | SULT1A1, NCEH1, MGST3, MGST1, MGST2, GGT1, BPHL, ACSM2B                                                                                                                                                                                                                                                                                                                                                              |



|  |                                           |                                    |                                           |          |                                                                                                                                                              |
|--|-------------------------------------------|------------------------------------|-------------------------------------------|----------|--------------------------------------------------------------------------------------------------------------------------------------------------------------|
|  | <b>GO Term<br/>Molecular<br/>Function</b> | GO:0008375                         | acetylglucosaminyltransferase<br>activity | 4.69E-05 | EXT2, HEXB, XYLT2, POMGNT2,<br>POMGNT1                                                                                                                       |
|  | <b>GO Term<br/>Biological<br/>Process</b> | GO:0008152                         | metabolic process                         | 6.03E-05 | NCEH1, SCP2, PITPNM2, GSTA1,<br>STARD9, ISOC1, ACSL4, FAHD2A,<br>UGT2B7, ACSM2B, SGSH                                                                        |
|  | <b>GO Term<br/>Biological<br/>Process</b> | GO:0055114                         | oxidation-reduction process               | 8.33E-05 | AAED1, CBR1, MAOB, GLDC, NCF2,<br>GPX3, GSR, AKR1D1, MGST1, DHCR24,<br>PTGR1, DHRS1, DHRS2, CRYZ,<br>AKR1B10, RDH10, HSD17B2, PIR,<br>RTN4IP1, STEAP2, MSRB1 |
|  | <b>KEGG<br/>Pathway</b>                   | hsa00480:Glutathione<br>metabolism |                                           | 1.12E-04 | GPX3, MGST3, GSR, GSTA1, MGST1,<br>MGST2, GGT1                                                                                                               |
|  | <b>GO Term<br/>Molecular<br/>Function</b> | GO:0004602                         | glutathione peroxidase activity           | 1.15E-04 | GPX3, MGST3, GSTA1, MGST1, MGST2                                                                                                                             |

|  |                                   |                                 |                                       |          |                                                                                                                                                                                                     |
|--|-----------------------------------|---------------------------------|---------------------------------------|----------|-----------------------------------------------------------------------------------------------------------------------------------------------------------------------------------------------------|
|  | <b>GO Term Cellular Component</b> | GO:0005887                      | integral component of plasma membrane | 4.50E-04 | SLC22A3, NAGPA, HS6ST1, TSPAN33, APOM, ATP7B, PALM, MFSD3, BCAP29, LRRC8E, ABCC1, TMEM150A, SLC30A3, SLC30A5, LANCL1, SEMA4F, GBAS, SLC39A14, ATRN, CEACAM1, TSPAN13, SLCO4A1, TMEM5, TYRO3, STEAP2 |
|  | <b>KEGG Pathway</b>               | hsa03320:PPAR signaling pathway |                                       | 5.80E-04 | ACOX2, GK, SCP2, FABP5, ACSL5, ACSL4, SLC27A4                                                                                                                                                       |
|  | <b>GO Term Cellular Component</b> | GO:0000139                      | Golgi membrane                        | 7.25E-04 | SEC24B, GOLT1B, LMAN2L, SEC16A, XYLT2, DHCR24, POMGNT1, HS6ST1, ZDHHC17, F5, GOLGA3, EXT2, TRAPPC6A, ATP7B, MGAT4A, TMEM5, PREB, ERGIC1, CTSC                                                       |
|  | <b>GO Term Molecular Function</b> | GO:0005215                      | transporter activity                  | 7.67E-04 | GOLGA3, SLC22A3, SEC24B, ABCC1, TMEM184B, FABP5, SLCO4A1, ABCC6, STEAP2, ABCD1                                                                                                                      |

|                                           |                     |                                                 |            |                                                                                                                                                |
|-------------------------------------------|---------------------|-------------------------------------------------|------------|------------------------------------------------------------------------------------------------------------------------------------------------|
| <b>GO Term<br/>Molecular<br/>Function</b> | GO:0015485          | cholesterol binding                             | 0.00207146 | OSBPL8, STARD4, STARD5, SCP2,<br>SOAT1                                                                                                         |
| <b>KEGG<br/>Pathway</b>                   | hsa04146:Peroxisome |                                                 | 0.00224239 | ABCD3, ACOX2, SCP2, MPV17L,<br>ACSL5, ACSL4, ABCD1                                                                                             |
| <b>GO Term<br/>Cellular<br/>Component</b> | GO:0043231          | intracellular membrane-bounded<br>organelle     | 0.00224418 | ABCD3, MGST3, SLC35B1, MPV17L,<br>MGST2, BPHL, ZDHHC17, DDOST,<br>OSTM1, SCP2, ACOX2, RDH10,<br>PITPNM2, PALM, STEAP2, ERGIC2,<br>UGT2B7, CTSB |
| <b>GO Term<br/>Biological<br/>Process</b> | GO:0071577          | zinc II ion transmembrane<br>transport          | 0.00225676 | SLC30A3, SLC30A5, SLC39A11,<br>SLC39A14                                                                                                        |
| <b>GO Term<br/>Biological<br/>Process</b> | GO:1901687          | glutathione derivative biosynthetic<br>process  | 0.00225676 | MGST3, GSTA1, MGST1, MGST2                                                                                                                     |
| <b>GO Term<br/>Biological<br/>Process</b> | GO:0042760          | very long-chain fatty acid catabolic<br>process | 0.00274258 | ABCD3, ABCD1, SLC27A4                                                                                                                          |

|                                           |                                      |                         |            |                                                                                                                                                                                                                         |
|-------------------------------------------|--------------------------------------|-------------------------|------------|-------------------------------------------------------------------------------------------------------------------------------------------------------------------------------------------------------------------------|
| <b>GO Term<br/>Cellular<br/>Component</b> | GO:0005739                           | mitochondrion           | 0.00284884 | ALAS1, MAOB, GLDC, MPV17L, MGST1, BPHL, ADH5, ACAT2, PTS, ACSM2B, GMPPB, ATP7B, SCP2, CA5A, DPYSL2, CAPN1, GLUL, ABCD1, CTSB, STARD4, COA1, STARD5, GK, GSR, ACSL5, GBAS, DHRS2, VASN, AGMAT, ACOX2, LACTB2, GLOD4, MCU |
| <b>GO Term<br/>Biological<br/>Process</b> | GO:0048208                           | COPII vesicle coating   | 0.00289325 | TRAPPC6A, SEC24B, SEC16A, PREB, CTSC, F5                                                                                                                                                                                |
| <b>GO Term<br/>Biological<br/>Process</b> | GO:0006629                           | lipid metabolic process | 0.00315851 | FABP5, MGST3, ACSL4, LIPA, UGT2B7, ACAT2, PAFAH2, SLC27A4                                                                                                                                                               |
| <b>KEGG<br/>Pathway</b>                   | hsa00590:Arachidonic acid metabolism |                         | 0.00381021 | CBR1, PLA2G12B, GPX3, PLA2G2A, GGT1                                                                                                                                                                                     |
| <b>KEGG<br/>Pathway</b>                   | hsa00071:Fatty acid degradation      |                         | 0.00470031 | ADH4, ACSL5, ACSL4, ADH5, ACAT2                                                                                                                                                                                         |

|                                           |                                                         |                                                       |            |                                                                       |
|-------------------------------------------|---------------------------------------------------------|-------------------------------------------------------|------------|-----------------------------------------------------------------------|
| <b>GO Term<br/>Molecular<br/>Function</b> | GO:0004364                                              | glutathione transferase activity                      | 0.00550645 | MGST3, GSTA1, MGST1, MGST2                                            |
| <b>GO Term<br/>Molecular<br/>Function</b> | GO:0016491                                              | oxidoreductase activity                               | 0.00607712 | MAOB, GSR, HSD17B2, RTN4IP1,<br>PTGR1, DHRS1, DHRS2, ADH5, CRYZ       |
| <b>GO Term<br/>Biological<br/>Process</b> | GO:0001523                                              | retinoid metabolic process                            | 0.00631386 | ADH4, APOM, AKR1B10, RDH10,<br>ADH5                                   |
| <b>GO Term<br/>Molecular<br/>Function</b> | GO:0016757                                              | transferase activity, transferring<br>glycosyl groups | 0.00646279 | EXT2, ALG2, GLT8D1, POMGNT2,<br>DDOST                                 |
| <b>GO Term<br/>Cellular<br/>Component</b> | GO:0005778                                              | peroxisomal membrane                                  | 0.00816829 | ABCD3, MPV17L, MGST1, ACSL4,<br>ABCD1                                 |
| <b>GO Term<br/>Cellular<br/>Component</b> | GO:0005788                                              | endoplasmic reticulum lumen                           | 0.00857925 | EDEM3, DNAJC3, COL1A1, MINPP1,<br>EDEM2, DNAJB11, CTSC, F5            |
| <b>GO Term<br/>Biological<br/>Process</b> | GO:0016042                                              | lipid catabolic process                               | 0.00859035 | NCEH1, PLA2G12B, PLA2G2A, LIPA,<br>PAFAH2                             |
| <b>KEGG<br/>Pathway</b>                   | hsa04141:Protein processing<br>in endoplasmic reticulum |                                                       | 0.00901497 | EDEM3, DNAJC3, SEC24B, EDEM2,<br>DNAJB11, MOGS, PREB, CAPN1,<br>DDOST |

|                                   |                                |                                                                  |            |                                                          |
|-----------------------------------|--------------------------------|------------------------------------------------------------------|------------|----------------------------------------------------------|
| <b>KEGG Pathway</b>               | hsa00510:N-Glycan biosynthesis |                                                                  | 0.01042918 | MGAT4A, ALG2, MOGS, DOLK, DDOST                          |
| <b>GO Term Molecular Function</b> | GO:0009055                     | electron carrier activity                                        | 0.0111149  | MAOB, ACOX2, NCF2, GLDC, GSR, ADH5                       |
| <b>GO Term Biological Process</b> | GO:0006888                     | ER to Golgi vesicle-mediated transport                           | 0.0114774  | TRAPPC6A, SEC24B, LMAN2L, BCAP29, PREB, CTSC, ERGIC1, F5 |
| <b>GO Term Biological Process</b> | GO:0010243                     | response to organonitrogen compound                              | 0.01167361 | MGST3, MGST1, MGST2                                      |
| <b>GO Term Molecular Function</b> | GO:0004467                     | long-chain fatty acid-CoA ligase activity                        | 0.01367883 | ACSL5, ACSL4, SLC27A4                                    |
| <b>GO Term Biological Process</b> | GO:0006691                     | leukotriene metabolic process                                    | 0.01411049 | ABCC1, PTGR1, GGT1                                       |
| <b>GO Term Cellular Component</b> | GO:0005777                     | peroxisome                                                       | 0.01436315 | ABCD3, ACOX2, SCP2, MPV17L, ISOC1, ABCD1                 |
| <b>GO Term Molecular Function</b> | GO:0042626                     | ATPase activity, coupled to transmembrane movement of substances | 0.01441151 | ABCC1, ABCD3, ABCC6, ABCD1                               |
| <b>GO Term Biological Process</b> | GO:0033540                     | fatty acid beta-oxidation using acyl-CoA oxidase                 | 0.01674622 | ACOX2, SCP2, ABCD1                                       |

|                                   |                                 |                                    |            |                                              |
|-----------------------------------|---------------------------------|------------------------------------|------------|----------------------------------------------|
| <b>KEGG Pathway</b>               | hsa00565:Ether lipid metabolism |                                    | 0.01748894 | TMEM86B, PLA2G12B, PLA2G2A, PAFAH2           |
| <b>GO Term Cellular Component</b> | GO:0005741                      | mitochondrial outer membrane       | 0.01825511 | MAOB, GK, MGST1, ACSL5, ACSL4, RTN4IP1, BPHL |
| <b>KEGG Pathway</b>               | hsa00830:Retinol metabolism     |                                    | 0.01916691 | ADH4, RDH10, ADH5, UGT2B7                    |
| <b>GO Term Biological Process</b> | GO:0006882                      | cellular zinc ion homeostasis      | 0.01957346 | ATP7B, SLC30A5, SLC39A14                     |
| <b>KEGG Pathway</b>               | hsa04142:Lysosome               |                                    | 0.02083955 | HEXB, NAGPA, LIPA, GNS, CTSC, SGSH, CTSB     |
| <b>GO Term Cellular Component</b> | GO:1903561                      | extracellular vesicle              | 0.02203176 | DNAJC3, CBR1, OLFML3, F5                     |
| <b>GO Term Biological Process</b> | GO:0006750                      | glutathione biosynthetic process   | 0.02258506 | MGST2, HAGH, GGT1                            |
| <b>KEGG Pathway</b>               | hsa02010:ABC transporters       |                                    | 0.0227817  | ABCC1, ABCD3, ABCC6, ABCD1                   |
| <b>GO Term Biological Process</b> | GO:0006749                      | glutathione metabolic process      | 0.02417616 | GSR, GSTA1, MGST1, GGT1                      |
| <b>GO Term Molecular Function</b> | GO:0004252                      | serine-type endopeptidase activity | 0.02543915 | CFD, HP, MASP2, CTSC, CTSB, F5               |

|                                   |                                                   |                                          |            |                                                               |
|-----------------------------------|---------------------------------------------------|------------------------------------------|------------|---------------------------------------------------------------|
| <b>GO Term Biological Process</b> | GO:0006635                                        | fatty acid beta-oxidation                | 0.02593013 | ABCD3, ACOX2, ABCD1, ACAT2                                    |
| <b>KEGG Pathway</b>               | hsa00260:Glycine, serine and threonine metabolism |                                          | 0.02674213 | BHMT, ALAS1, MAOB, GLDC                                       |
| <b>GO Term Biological Process</b> | GO:0035269                                        | protein O-linked mannosylation           | 0.02913368 | TMEM5, SDF2, POMGNT2                                          |
| <b>GO Term Biological Process</b> | GO:0007031                                        | peroxisome organization                  | 0.02913368 | ABCD3, SCP2, ABCD1                                            |
| <b>GO Term Biological Process</b> | GO:0006491                                        | N-glycan processing                      | 0.02913368 | EDEM3, MGAT4A, EDEM2                                          |
| <b>GO Term Cellular Component</b> | GO:0005764                                        | lysosome                                 | 0.03028525 | TMEM150A, AKR1B10, CAPN1, LIPA, GNS, CTSC, SGSH, CTSB         |
| <b>GO Term Biological Process</b> | GO:0055085                                        | transmembrane transport                  | 0.03054357 | SLC22A3, ABCC1, ABCD3, SLC35B1, ABCC6, MFSD3, ABCD1, SLC25A44 |
| <b>KEGG Pathway</b>               | hsa00531:Glycosaminoglycan degradation            |                                          | 0.03260796 | HEXB, GNS, SGSH                                               |
| <b>GO Term Biological Process</b> | GO:0008207                                        | C21-steroid hormone metabolic process    | 0.03348328 | AKR1D1, DHRS2                                                 |
| <b>GO Term Biological Process</b> | GO:0015910                                        | peroxisomal long-chain fatty acid import | 0.03348328 | ABCD3, ABCD1                                                  |



|                                   |                                         |                                             |            |                                                                                                                                     |
|-----------------------------------|-----------------------------------------|---------------------------------------------|------------|-------------------------------------------------------------------------------------------------------------------------------------|
| <b>GO Term Cellular Component</b> | GO:0005615                              | extracellular space                         | 0.03367298 | CFD, IGFBP1, AHSG, SERPINC1, GPX3, HEXB, PLA2G2A, SERPINA10, HP, SEMA4F, VASN, F5, COL1A1, ATRN, LGALS3, TF, SDF2, GGT1, CTSC, CTSB |
| <b>GO Term Molecular Function</b> | GO:0005385                              | zinc ion transmembrane transporter activity | 0.03527053 | SLC30A5, SLC39A11, SLC39A14                                                                                                         |
| <b>GO Term Biological Process</b> | GO:0001676                              | long-chain fatty acid metabolic process     | 0.03633849 | ACSL5, ACSL4, SLC27A4                                                                                                               |
| <b>KEGG Pathway</b>               | hsa00120:Primary bile acid biosynthesis |                                             | 0.03680793 | ACOX2, SCP2, AKR1D1                                                                                                                 |
| <b>GO Term Molecular Function</b> | GO:0016209                              | antioxidant activity                        | 0.03899721 | AAED1, APOM, HP                                                                                                                     |
| <b>GO Term Biological Process</b> | GO:0098656                              | anion transmembrane transport               | 0.04017098 | ABCC1, ABCC6, LRRC8E                                                                                                                |
| <b>GO Term Biological Process</b> | GO:0006699                              | bile acid biosynthetic process              | 0.04017098 | ACOX2, SCP2, AKR1D1                                                                                                                 |
| <b>GO Term Biological Process</b> | GO:0006486                              | protein glycosylation                       | 0.04109547 | EXT2, SDF2, NAGPA, POMGNT1, DDOST                                                                                                   |

|  |                                   |                                                                     |                                                      |            |                             |
|--|-----------------------------------|---------------------------------------------------------------------|------------------------------------------------------|------------|-----------------------------|
|  | <b>KEGG Pathway</b>               | hsa00534:Glycosaminoglycan biosynthesis - heparan sulfate / heparin |                                                      | 0.04120341 | EXT2, XYLT2, HS6ST1         |
|  | <b>KEGG Pathway</b>               | hsa01212:Fatty acid metabolism                                      |                                                      | 0.04600085 | ACSL5, ACSL4, ELOVL6, ACAT2 |
|  | <b>GO Term Molecular Function</b> | GO:0004022                                                          | alcohol dehydrogenase (NAD) activity                 | 0.04901067 | ADH4, ADH5                  |
|  | <b>GO Term Molecular Function</b> | GO:0016309                                                          | 1-phosphatidylinositol-5-phosphate 4-kinase activity | 0.04901067 | PIP4K2B, PIP4K2C            |

|   |                 |          |                    |          |                                                                                                                                                                                                                                                                                                                                                                                                  |
|---|-----------------|----------|--------------------|----------|--------------------------------------------------------------------------------------------------------------------------------------------------------------------------------------------------------------------------------------------------------------------------------------------------------------------------------------------------------------------------------------------------|
| 6 | KEGG<br>Pathway | hsa01100 | Metabolic pathways | 7.96E-17 | MOCS2, PANK3, PIGO, ABAT, MTR,<br>PIGW, PFAS, PIGV, PPCDC, RFK,<br>PGM2, ACADM, ENPP3, HADH,<br>SEPHS2, HIBCH, PGM1, ALG8, ALG6,<br>CHPF2, ALG14, SORD, HOGA1, PIGB,<br>PIGK, IDNK, UMP5, B4GALT7, PIGF,<br>MOCS1, B4GALT4, ST6GALNAC6,<br>LIPT1, DDC, COX17, MRI1, DLST,<br>PDHB, ATP5L, NFS1, CHSY1, AFMID,<br>ST3GAL6, ASL, ARSB, NDUFA8,<br>C1GALT1, TRIT1, COQ6, RPIA, GALE,<br>P4HA1, OGDH |
|---|-----------------|----------|--------------------|----------|--------------------------------------------------------------------------------------------------------------------------------------------------------------------------------------------------------------------------------------------------------------------------------------------------------------------------------------------------------------------------------------------------|

|  |                                  |            |               |          |                                                                                                                                                                                                                                                                                                                                                                                                                                                                                                                                            |
|--|----------------------------------|------------|---------------|----------|--------------------------------------------------------------------------------------------------------------------------------------------------------------------------------------------------------------------------------------------------------------------------------------------------------------------------------------------------------------------------------------------------------------------------------------------------------------------------------------------------------------------------------------------|
|  | GO Term<br>Cellular<br>Component | GO:0005739 | mitochondrion | 1.98E-14 | <p> MIPEP, SLC35F6, SRP19, ISCA2,<br/> RMND1, ABAT, MRPL34, MRPL32,<br/> PROSC, CHCHD3, RFK, CDK5RAP1,<br/> ACADM, HADH, COA6, HIBCH,<br/> METTL17, HEMK1, TSFM, PPTC7,<br/> MRPS22, ACAD9, C10ORF10, MRPL49,<br/> HOGA1, MRPL45, MRPL46, GCAT,<br/> CLPX, PYURF, OXLD1, RPUSD2,<br/> SDHAF1, MTFR1, L2HGDH, ATPAF1,<br/> LIPT1, MRPS36, TIMM9, COX17, DLST,<br/> GLRX, PDHB, TMEM70, ATP5L, NFS1,<br/> MARC2, C6ORF203, MARC1, TNRC18,<br/> ARSB, NDUFA8, APOOL, NUBPL,<br/> DNAJC11, TRIT1, COQ6, DNAJA1,<br/> P4HA1, NDUFAF4, OGDH </p> |
|--|----------------------------------|------------|---------------|----------|--------------------------------------------------------------------------------------------------------------------------------------------------------------------------------------------------------------------------------------------------------------------------------------------------------------------------------------------------------------------------------------------------------------------------------------------------------------------------------------------------------------------------------------------|

|  |                                           |            |                                                                               |          |                                                                                                                                                                                                                                         |
|--|-------------------------------------------|------------|-------------------------------------------------------------------------------|----------|-----------------------------------------------------------------------------------------------------------------------------------------------------------------------------------------------------------------------------------------|
|  | <b>GO Term<br/>Cellular<br/>Component</b> | GO:0005743 | mitochondrial inner membrane                                                  | 3.36E-09 | MRPS36, TIMM9, MRPL19, SQRDL,<br>MRPL34, MRPL32, TMEM70, ATP5L,<br>CHCHD3, MARC2, MARC1, HADH,<br>RHBDL2, CYB5B, NDUFA8, MRPS22,<br>ACAD9, MRPL49, DNAJC11, MRPL45,<br>MRPL46, CLPX, GCAT, COQ6,<br>MRPL50, NDUFAF4, L2HGDH,<br>NDUFAF1 |
|  | <b>GO Term<br/>Biological<br/>Process</b> | GO:0006506 | GPI anchor biosynthetic process                                               | 3.48E-09 | PIGB, PYURF, PIGO, PGAP3, PIGZ,<br>MPPE1, PIGW, PIGF, PIGV                                                                                                                                                                              |
|  | <b>KEGG<br/>Pathway</b>                   | hsa00532   | Glycosaminoglycan biosynthesis -<br>chondroitin sulfate / dermatan<br>sulfate | 1.68E-07 | CHST7, CHSY1, CHPF2, CHST15,<br>CHST13, CHST14, B4GALT7                                                                                                                                                                                 |
|  | <b>KEGG<br/>Pathway</b>                   | hsa00563   | Glycosylphosphatidylinositol(GPI)-<br>anchor biosynthesis                     | 2.53E-06 | PIGB, PIGO, PIGK, PIGZ, PIGW, PIGF,<br>PIGV                                                                                                                                                                                             |
|  | <b>GO Term<br/>Biological<br/>Process</b> | GO:0070125 | mitochondrial translational<br>elongation                                     | 1.19E-05 | TSFM, MRPL50, MRPS36, MRPS22,<br>MRPL19, MRPL49, MRPL34, MRPL45,<br>MRPL46, MRPL32                                                                                                                                                      |

|  |                                           |            |                                             |          |                                                                                                                        |
|--|-------------------------------------------|------------|---------------------------------------------|----------|------------------------------------------------------------------------------------------------------------------------|
|  | <b>GO Term<br/>Biological<br/>Process</b> | GO:0030206 | chondroitin sulfate biosynthetic<br>process | 1.28E-05 | CHST7, SLC35D1, CHSY1, CHPF2,<br>CHST15, CHST13                                                                        |
|  | <b>GO Term<br/>Molecular<br/>Function</b> | GO:0016740 | transferase activity                        | 3.81E-05 | ALG8, CHST15, CDK5RAP1, DLST,<br>GLRX, CASD1, UMPS, PFAS, TRIT1                                                        |
|  | <b>GO Term<br/>Biological<br/>Process</b> | GO:0070126 | mitochondrial translational<br>termination  | 1.02E-04 | MRPL50, MRPS36, MRPS22, MRPL19,<br>MRPL49, MRPL34, MRPL45, MRPL46,<br>MRPL32                                           |
|  | <b>GO Term<br/>Cellular<br/>Component</b> | GO:0005759 | mitochondrial matrix                        | 1.07E-04 | MIPEP, ISCA2, LIPT1, TSFM, NUBPL,<br>DLST, ABAT, PDHB, TRIT1, CLPX,<br>NFS1, SDHAF1, OGDH, ACADM,<br>HADH, HIBCH, CBR4 |
|  | <b>GO Term<br/>Molecular<br/>Function</b> | GO:0030170 | pyridoxal phosphate binding                 | 1.27E-04 | PROSC, DDC, NFS1, MARC2, MARC1,<br>ABAT, GCAT                                                                          |
|  | <b>GO Term<br/>Molecular<br/>Function</b> | GO:0051536 | iron-sulfur cluster binding                 | 1.70E-04 | NFS1, GLRX3, TYW1, CDK5RAP1,<br>ABAT                                                                                   |

|  |                                           |            |                                |          |                                                                                                                                                                                                          |
|--|-------------------------------------------|------------|--------------------------------|----------|----------------------------------------------------------------------------------------------------------------------------------------------------------------------------------------------------------|
|  | <b>GO Term<br/>Cellular<br/>Component</b> | GO:0005789 | endoplasmic reticulum membrane | 2.20E-04 | TRAM1, SLC35D1, PIGO, FKBP14,<br>PIGZ, PIGW, PIGV, UFL1, NCLN,<br>SEC61G, TMEM129, CREB3L2, DNAJB9,<br>SEC11C, NUS1, CYB5A, ALG8, ALG6,<br>SSR3, ALG14, ERLIN1, PYURF, PIGB,<br>ERP44, PIGK, SRPRB, PIGF |
|  | <b>GO Term<br/>Molecular<br/>Function</b> | GO:0003824 | catalytic activity             | 4.87E-04 | NFS1, AASDH, MARC2, MARC1,<br>TYW1, CDK5RAP1, CDYL, MOCS1,<br>GLA, GCAT, PPCDC                                                                                                                           |

|  |                                  |            |                                |          |                                                                                                                                                                                                                                                                                                                                                                                                                                                                                                                                                                                                                               |
|--|----------------------------------|------------|--------------------------------|----------|-------------------------------------------------------------------------------------------------------------------------------------------------------------------------------------------------------------------------------------------------------------------------------------------------------------------------------------------------------------------------------------------------------------------------------------------------------------------------------------------------------------------------------------------------------------------------------------------------------------------------------|
|  | GO Term<br>Cellular<br>Component | GO:0016021 | integral component of membrane | 5.18E-04 | SLC35F6, TRAM1, PIGO, PGAP3,<br>GOLT1A, SLC35F5, PIGZ, PIGW, PIGV,<br>SCAMP5, PCMT1, SEC61G, CREB3L2,<br>ACP2, ENPP3, ALG8, CHST7, PAQR7,<br>ALG6, CHPF2, MMD, SSR3, ALG14,<br>HOGA1, MANEAL, CDYL, CASD1,<br>TPST2, FRMD3, PIGB, TMEM2,<br>SLC5A9, L2HGDH, MPPE1, PPP1R12B,<br>B4GALT7, PIGF, B4GALT4,<br>ST6GALNAC6, SLC26A2, TP53I13,<br>SLC35D1, AASDH, COX18, THADA,<br>C4ORF32, TMTC4, NCLN, CHSY1,<br>C16ORF91, MARC2, TMEM129, ARSK,<br>MARC1, CHST15, TYW1, ST3GAL6,<br>CHST13, LRIG2, CHST14, APOL1,<br>RHBDL2, SEC11C, CYB5B, SLC35A2,<br>NUS1, CYB5A, C1GALT1, ERLIN1,<br>TMEM230, WDR11, RPIA, DPY19L4,<br>SRPRB |
|--|----------------------------------|------------|--------------------------------|----------|-------------------------------------------------------------------------------------------------------------------------------------------------------------------------------------------------------------------------------------------------------------------------------------------------------------------------------------------------------------------------------------------------------------------------------------------------------------------------------------------------------------------------------------------------------------------------------------------------------------------------------|



|  |                                   |            |                                                    |            |                                                                  |
|--|-----------------------------------|------------|----------------------------------------------------|------------|------------------------------------------------------------------|
|  | <b>GO Term Biological Process</b> | GO:0097502 | mannosylation                                      | 5.29E-04   | PIGB, ALG8, PIGZ, PIGV                                           |
|  | <b>GO Term Biological Process</b> | GO:0046487 | glyoxylate metabolic process                       | 7.69E-04   | LIPT1, OGDH, DLST, HOGA1, PDHB                                   |
|  | <b>GO Term Molecular Function</b> | GO:0000030 | mannosyltransferase activity                       | 9.85E-04   | PIGB, DPY19L4, PIGZ, PIGV                                        |
|  | <b>GO Term Molecular Function</b> | GO:0016757 | transferase activity, transferring glycosyl groups | 0.00100242 | PIGB, PIGZ, GYG2, B4GALT7, B3GNTL1, B4GALT4                      |
|  | <b>KEGG Pathway</b>               | hsa01130   | Biosynthesis of antibiotics                        | 0.00107115 | RPIA, OGDH, PGM2, DLST, ASL, IDNK, ACADM, PDHB, HADH, PFAS, PGM1 |
|  | <b>GO Term Cellular Component</b> | GO:0005762 | mitochondrial large ribosomal subunit              | 0.00151651 | MRPL50, MRPL19, MRPL49, MRPL34, MRPL46, MRPL32                   |
|  | <b>GO Term Biological Process</b> | GO:0016254 | preassembly of GPI anchor in ER membrane           | 0.0018838  | PIGB, PIGW, PIGF, PIGV                                           |
|  | <b>GO Term Biological Process</b> | GO:0006687 | glycosphingolipid metabolic process                | 0.00309808 | NEU3, ARSK, GLA, ARSB, ST6GALNAC6                                |
|  | <b>GO Term Molecular Function</b> | GO:0051539 | 4 iron, 4 sulfur cluster binding                   | 0.00397377 | ISCA2, NUBPL, TYW1, CDK5RAP1, MOCS1                              |

|                                   |            |                                                |            |                                                                                                                     |
|-----------------------------------|------------|------------------------------------------------|------------|---------------------------------------------------------------------------------------------------------------------|
| <b>GO Term Biological Process</b> | GO:0019388 | galactose catabolic process                    | 0.00410899 | GALE, PGM2, PGM1                                                                                                    |
| <b>GO Term Biological Process</b> | GO:0032324 | molybdopterin cofactor biosynthetic process    | 0.00410899 | MOCS2, NFS1, MOCS1                                                                                                  |
| <b>GO Term Biological Process</b> | GO:0006777 | Mo-molybdopterin cofactor biosynthetic process | 0.00410899 | MOCS2, NFS1, MOCS1                                                                                                  |
| <b>GO Term Biological Process</b> | GO:0055114 | oxidation-reduction process                    | 0.00457042 | CYB5B, CYB5A, NDUFA8, GLRX3, MRPS36, SORD, GLRX, COQ6, P4HA1, MARC2, MARC1, TYW1, ACADM, L2HGDH, HIF1AN, PIGF, CBR4 |
| <b>GO Term Biological Process</b> | GO:0005975 | carbohydrate metabolic process                 | 0.00516097 | NEU3, PGM2, IDNK, B4GALT7, GLA, PGM1, GALK2, B4GALT4                                                                |
| <b>GO Term Biological Process</b> | GO:0005978 | glycogen biosynthetic process                  | 0.00584322 | PGM2, ACADM, GYG2, PGM1                                                                                             |
| <b>KEGG Pathway</b>               | hsa00052   | Galactose metabolism                           | 0.00628912 | GALE, PGM2, GLA, PGM1                                                                                               |
| <b>KEGG Pathway</b>               | hsa01200   | Carbon metabolism                              | 0.00670813 | RPIA, OGDH, DLST, IDNK, ACADM, PDHB, HIBCH                                                                          |

|                                   |            |                                       |            |                                                                                                                                            |
|-----------------------------------|------------|---------------------------------------|------------|--------------------------------------------------------------------------------------------------------------------------------------------|
| <b>KEGG Pathway</b>               | hsa03060   | Protein export                        | 0.00714202 | SRP19, SEC61G, SRPRB, SEC11C                                                                                                               |
| <b>GO Term Biological Process</b> | GO:0006012 | galactose metabolic process           | 0.0075003  | SLC35A2, GALE, GALK2                                                                                                                       |
| <b>KEGG Pathway</b>               | hsa00030   | Pentose phosphate pathway             | 0.00904505 | RPIA, PGM2, IDNK, PGM1                                                                                                                     |
| <b>GO Term Biological Process</b> | GO:0006400 | tRNA modification                     | 0.00938754 | QTRT1, CDK5RAP1, TRIT1, ADAT2                                                                                                              |
| <b>GO Term Cellular Component</b> | GO:0000139 | Golgi membrane                        | 0.00981268 | SLC35A2, CHST7, GOLT1A, CHPF2, PGAP3, C1GALT1, MANEAL, SCAMP5, TPST2, CHSY1, CHST15, ST3GAL6, CHST13, CHST14, B4GALT7, B4GALT4, ST6GALNAC6 |
| <b>GO Term Cellular Component</b> | GO:0005761 | mitochondrial ribosome                | 0.01163487 | MRPS22, MRPL49, MRPL34, MRPL32                                                                                                             |
| <b>GO Term Biological Process</b> | GO:0008535 | respiratory chain complex IV assembly | 0.01178791 | COX18, COA6, METTL17                                                                                                                       |
| <b>KEGG Pathway</b>               | hsa04122   | Sulfur relay system                   | 0.0124701  | MOCS2, NFS1, MOCS1                                                                                                                         |

|                                   |            |                                                      |            |                                                                 |
|-----------------------------------|------------|------------------------------------------------------|------------|-----------------------------------------------------------------|
| <b>GO Term Cellular Component</b> | GO:0005788 | endoplasmic reticulum lumen                          | 0.01301724 | ERP44, P4HA1, FKBP14, ARSK, DNAJB9, UGGT2, COLGALT1, ARSB       |
| <b>KEGG Pathway</b>               | hsa00380   | Tryptophan metabolism                                | 0.01786815 | DDC, AFMID, OGDH, HADH                                          |
| <b>GO Term Biological Process</b> | GO:0032981 | mitochondrial respiratory chain complex I assembly   | 0.02088426 | NDUFA8, NUBPL, NDUFAF4, ACAD9, NDUFAF1                          |
| <b>GO Term Molecular Function</b> | GO:0051082 | unfolded protein binding                             | 0.02114161 | DNAJA1, CCDC115, DNAJA2, NDUFAF1, UGGT2, CLPX                   |
| <b>GO Term Biological Process</b> | GO:0008152 | metabolic process                                    | 0.02180758 | AASDH, AFMID, ARSK, DLST, HOGA1, CDYL, ARSB                     |
| <b>GO Term Cellular Component</b> | GO:0005840 | ribosome                                             | 0.02210142 | MRPL50, MRPS22, MRPL19, MRPL49, MRPL34, MRPL45, MRPL32, METTL17 |
| <b>GO Term Biological Process</b> | GO:0006488 | dolichol-linked oligosaccharide biosynthetic process | 0.02601909 | ALG8, ALG6, ALG14                                               |
| <b>KEGG Pathway</b>               | hsa00770   | Pantothenate and CoA biosynthesis                    | 0.02749518 | PANK3, ENPP3, PPCDC                                             |
| <b>GO Term Biological Process</b> | GO:0009311 | oligosaccharide metabolic process                    | 0.029409   | ST3GAL6, GLA, ST6GALNAC6                                        |

|  |                                           |            |                                  |            |                                                                                                                                                                                                                                                                                             |
|--|-------------------------------------------|------------|----------------------------------|------------|---------------------------------------------------------------------------------------------------------------------------------------------------------------------------------------------------------------------------------------------------------------------------------------------|
|  | <b>GO Term<br/>Molecular<br/>Function</b> | GO:0046872 | metal ion binding                | 0.0302646  | ZNF232, MIPEP, TIMM9, ABAT, PFAS, ZNF26, NFS1, CHSY1, ZNF706, ZNF407, RFK, TMEM129, ARSK, CDK5RAP1, TYW1, ADNP2, ENPP3, ZNF500, ZNF740, ARSB, ZBED3, CYB5B, ZNF561, CYB5A, GLRX3, PPTC7, NUBPL, C1GALT1, CDC42BPA, CLPX, QTRT1, DNAJA1, THAP5, ZFYVE19, DNAJA2, SPRTN, OGDH, MOCS1, B4GALT4 |
|  | <b>GO Term<br/>Cellular<br/>Component</b> | GO:0043202 | lysosomal lumen                  | 0.03205868 | NAAA, ACP2, GYG2, GLA, ARSB                                                                                                                                                                                                                                                                 |
|  | <b>GO Term<br/>Molecular<br/>Function</b> | GO:0051087 | chaperone binding                | 0.03233565 | DNAJA1, TIMM9, DNAJA2, OGDH, AHSA2                                                                                                                                                                                                                                                          |
|  | <b>GO Term<br/>Biological<br/>Process</b> | GO:0006103 | 2-oxoglutarate metabolic process | 0.03296408 | MRPS36, OGDH, L2HGDH                                                                                                                                                                                                                                                                        |

|                                   |            |                                                                           |            |                          |
|-----------------------------------|------------|---------------------------------------------------------------------------|------------|--------------------------|
| <b>GO Term Biological Process</b> | GO:0070900 | mitochondrial tRNA modification                                           | 0.03365266 | CDK5RAP1, TRIT1          |
| <b>GO Term Biological Process</b> | GO:0051410 | detoxification of nitrogen compound                                       | 0.03365266 | MARC2, MARC1             |
| <b>GO Term Biological Process</b> | GO:0006490 | oligosaccharide-lipid intermediate biosynthetic process                   | 0.03365266 | ALG8, ALG6               |
| <b>GO Term Biological Process</b> | GO:0006505 | GPI anchor metabolic process                                              | 0.03365266 | PGAP3, PIGW              |
| <b>GO Term Biological Process</b> | GO:0042126 | nitrate metabolic process                                                 | 0.03365266 | MARC2, MARC1             |
| <b>GO Term Molecular Function</b> | GO:0008940 | nitrate reductase activity                                                | 0.03411766 | MARC2, MARC1             |
| <b>GO Term Molecular Function</b> | GO:0042281 | dolichyl pyrophosphate Man9GlcNAc2 alpha-1,3-glucosyltransferase activity | 0.03411766 | ALG8, ALG6               |
| <b>GO Term Molecular Function</b> | GO:0004376 | glycolipid mannosyltransferase activity                                   | 0.03411766 | PIGB, PIGV               |
| <b>GO Term Cellular Component</b> | GO:0019008 | molybdopterin synthase complex                                            | 0.03501875 | MOCS2, MOCS1             |
| <b>KEGG Pathway</b>               | hsa00280   | Valine, leucine and isoleucine degradation                                | 0.0459559  | ABAT, ACADM, HADH, HIBCH |

|  |                                           |            |                            |            |                      |
|--|-------------------------------------------|------------|----------------------------|------------|----------------------|
|  | <b>GO Term<br/>Biological<br/>Process</b> | GO:0005980 | glycogen catabolic process | 0.04870827 | PGM2, GYG2, PGM1     |
|  | <b>GO Term<br/>Biological<br/>Process</b> | GO:0006479 | protein methylation        | 0.04870827 | N6AMT1, HEMK1, PCMT1 |
